# Supplementary material
Source: PubMed Central journal article supplement (PMC5535754)
Supplement: NIHMS884641-supplement-Supplementary_Table_1.pdf [file NIHMS884641-supplement-Supplementary_Table_1.pdf]

**Supplementary Table 1: Significantly Differentially Expressed Genes by Illumina Microarray**

| Illumina_ID  | Gene      | logFC | AveExpr | t      | P.Value  | adj.P.Val | B     |
|--------------|-----------|-------|---------|--------|----------|-----------|-------|
| ILMN_1651958 | MGP       | 2.22  | 9.50    | 15.91  | 8.73E-29 | 1.51E-24  | 54.65 |
| ILMN_2071809 | MGP       | 2.16  | 9.62    | 15.95  | 5.39E-29 | 1.51E-24  | 55.13 |
| ILMN_2132982 | IGFBP5    | 1.90  | 10.02   | 15.51  | 3.90E-28 | 4.48E-24  | 53.22 |
| ILMN_1772612 | ANGPTL2   | 1.26  | 8.21    | 13.26  | 1.36E-23 | 1.17E-19  | 43.05 |
| ILMN_1675268 | LRP4      | -0.86 | 7.39    | -12.88 | 8.36E-23 | 5.77E-19  | 41.28 |
| ILMN_1712636 | NVL       | -0.66 | 7.68    | -12.74 | 1.62E-22 | 9.30E-19  | 40.63 |
| ILMN_1678842 | THBS2     | 1.33  | 7.32    | 12.55  | 4.08E-22 | 1.65E-18  | 39.73 |
| ILMN_1693014 | CEBPB     | 1.40  | 10.08   | 12.55  | 4.09E-22 | 1.65E-18  | 39.73 |
| ILMN_1701875 | ZYX       | 1.00  | 8.60    | 12.54  | 4.30E-22 | 1.65E-18  | 39.68 |
| ILMN_1701461 | TIMP3     | 1.24  | 8.03    | 12.43  | 7.46E-22 | 2.57E-18  | 39.14 |
| ILMN_1748124 | TSC22D3   | 1.73  | 9.66    | 12.34  | 1.16E-21 | 3.64E-18  | 38.71 |
| ILMN_1722898 | SFRP2     | 1.20  | 7.01    | 12.17  | 2.64E-21 | 7.57E-18  | 37.91 |
| ILMN_2391512 | NAAA      | -1.02 | 8.11    | -12.03 | 5.08E-21 | 1.35E-17  | 37.27 |
| ILMN_2376403 | TSC22D3   | 1.84  | 8.52    | 11.97  | 6.96E-21 | 1.71E-17  | 36.96 |
| ILMN_1687306 | LGALS2    | -1.43 | 8.44    | -11.93 | 8.44E-21 | 1.78E-17  | 36.77 |
| ILMN_1771599 | PLOD2     | -1.08 | 10.52   | -11.93 | 8.65E-21 | 1.78E-17  | 36.75 |
| ILMN_1790689 | CRISPLD2  | 1.58  | 9.24    | 11.92  | 8.78E-21 | 1.78E-17  | 36.73 |
| ILMN_1687848 | C7        | 1.01  | 7.28    | 11.79  | 1.64E-20 | 3.15E-17  | 36.12 |
| ILMN_1795251 | SPARCL1   | 1.10  | 9.91    | 11.76  | 1.96E-20 | 3.55E-17  | 35.95 |
| ILMN_1676563 | HTRA1     | 0.92  | 8.24    | 11.72  | 2.38E-20 | 4.10E-17  | 35.76 |
| ILMN_1668605 | NAAA      | -1.02 | 8.48    | -11.67 | 3.01E-20 | 4.95E-17  | 35.53 |
| ILMN_1654370 | TESK2     | -0.56 | 7.33    | -11.59 | 4.53E-20 | 6.79E-17  | 35.13 |
| ILMN_1788874 | SERPINA3  | 1.53  | 7.70    | 11.59  | 4.43E-20 | 6.79E-17  | 35.15 |
| ILMN_2050911 | SLC22A4   | -0.49 | 7.01    | -11.57 | 5.03E-20 | 7.23E-17  | 35.03 |
| ILMN_1651496 | HIST1H2BD | -1.28 | 9.34    | -11.55 | 6.32E-20 | 8.07E-17  | 34.80 |
| ILMN_1696657 | LRRN2     | -1.46 | 8.00    | -11.52 | 6.27E-20 | 8.07E-17  | 34.81 |
| ILMN_1723847 | CILP      | 1.29  | 7.41    | 11.57  | 5.87E-20 | 8.07E-17  | 34.88 |
| ILMN_2371169 | ZYX       | 0.71  | 7.72    | 11.51  | 6.57E-20 | 8.09E-17  | 34.77 |
| ILMN_1696434 | LAMA1     | -1.35 | 7.96    | -11.49 | 7.46E-20 | 8.87E-17  | 34.64 |
| ILMN_1759818 | SORL1     | -0.76 | 8.83    | -11.46 | 8.61E-20 | 9.90E-17  | 34.50 |
| ILMN_1717934 | SYT11     | 0.79  | 8.15    | 11.41  | 1.10E-19 | 1.22E-16  | 34.26 |
| ILMN_1791580 | FXSD3     | -1.32 | 8.60    | -11.38 | 1.25E-19 | 1.35E-16  | 34.14 |
| ILMN_1752965 | GREM1     | 1.90  | 8.85    | 11.38  | 1.29E-19 | 1.35E-16  | 34.10 |
| ILMN_1684982 | PDK4      | 1.40  | 9.20    | 11.30  | 1.88E-19 | 1.91E-16  | 33.74 |
| ILMN_1758623 | HIST1H2BD | -0.95 | 8.15    | -11.29 | 2.28E-19 | 2.20E-16  | 33.55 |
| ILMN_1759670 | AMACR     | -0.89 | 7.64    | -11.29 | 2.30E-19 | 2.20E-16  | 33.54 |
| ILMN_1673566 | ADAMTS1   | 1.64  | 7.87    | 11.25  | 2.43E-19 | 2.23E-16  | 33.49 |
| ILMN_1806733 | COL18A1   | 0.88  | 7.82    | 11.25  | 2.46E-19 | 2.23E-16  | 33.47 |
| ILMN_1719236 | CDH5      | 0.64  | 7.29    | 11.22  | 2.76E-19 | 2.44E-16  | 33.36 |
| ILMN_1709486 | SRPX      | 1.16  | 7.89    | 11.24  | 2.90E-19 | 2.50E-16  | 33.32 |
| ILMN_1684210 | NIPAL3    | -0.51 | 7.88    | -11.20 | 3.05E-19 | 2.56E-16  | 33.27 |
| ILMN_1712066 | EXPH5     | -0.79 | 7.42    | -11.11 | 4.75E-19 | 3.90E-16  | 32.83 |
| ILMN_1782050 | CEBPD     | 1.20  | 9.81    | 11.07  | 5.92E-19 | 4.75E-16  | 32.62 |
| ILMN_1680652 | SELENBP1  | -1.93 | 9.97    | -11.01 | 1.02E-18 | 7.48E-16  | 32.09 |
| ILMN_1685433 | COL8A1    | 0.75  | 6.94    | 10.97  | 9.55E-19 | 7.48E-16  | 32.15 |
| ILMN_1715508 | NNMT      | 1.04  | 7.29    | 10.96  | 1.01E-18 | 7.48E-16  | 32.09 |

|              |          |       |       |        |          |          |       |
|--------------|----------|-------|-------|--------|----------|----------|-------|
| ILMN_2112638 | SVEP1    | 1.15  | 7.95  | 10.97  | 9.87E-19 | 7.48E-16 | 32.12 |
| ILMN_1774602 | FBLN2    | 1.10  | 8.03  | 10.97  | 1.12E-18 | 8.03E-16 | 32.00 |
| ILMN_1808114 | LYVE1    | 1.11  | 7.27  | 10.91  | 1.32E-18 | 9.30E-16 | 31.83 |
| ILMN_1801491 | SLC26A2  | -1.86 | 8.67  | -10.89 | 1.40E-18 | 9.68E-16 | 31.77 |
| ILMN_1715715 | CEBPA    | -0.73 | 8.94  | -10.86 | 1.64E-18 | 1.11E-15 | 31.62 |
| ILMN_1766169 | BCAT1    | 0.66  | 7.07  | 10.82  | 1.99E-18 | 1.27E-15 | 31.43 |
| ILMN_1778523 | KLF9     | 0.90  | 10.03 | 10.83  | 1.93E-18 | 1.27E-15 | 31.46 |
| ILMN_2390919 | FBLN2    | 1.06  | 7.64  | 10.82  | 2.00E-18 | 1.27E-15 | 31.43 |
| ILMN_1662619 | TFPI     | 0.78  | 7.92  | 10.82  | 2.07E-18 | 1.30E-15 | 31.39 |
| ILMN_1814296 | TRPM6    | -2.15 | 9.11  | -10.79 | 2.37E-18 | 1.46E-15 | 31.26 |
| ILMN_1671295 | CCDC3    | 0.59  | 6.94  | 10.78  | 2.46E-18 | 1.49E-15 | 31.22 |
| ILMN_1807042 | MARCKS   | -0.51 | 11.33 | -10.77 | 2.58E-18 | 1.53E-15 | 31.18 |
| ILMN_1661599 | DDIT4    | 1.31  | 8.56  | 10.76  | 2.67E-18 | 1.56E-15 | 31.14 |
| ILMN_1715991 | SDPR     | 0.78  | 7.88  | 10.73  | 3.14E-18 | 1.81E-15 | 30.98 |
| ILMN_1736178 | AEBP1    | 0.94  | 8.50  | 10.73  | 3.22E-18 | 1.82E-15 | 30.96 |
| ILMN_1778681 | EBF1     | 0.79  | 7.29  | 10.71  | 3.52E-18 | 1.96E-15 | 30.87 |
| ILMN_1738578 | FILIP1L  | 1.06  | 8.02  | 10.70  | 3.65E-18 | 2.00E-15 | 30.84 |
| ILMN_1759097 | MLLT11   | 0.66  | 6.88  | 10.66  | 4.44E-18 | 2.39E-15 | 30.65 |
| ILMN_1773389 | PLTP     | 1.14  | 8.16  | 10.64  | 4.90E-18 | 2.60E-15 | 30.55 |
| ILMN_1786598 | COL14A1  | 0.66  | 7.17  | 10.63  | 5.15E-18 | 2.65E-15 | 30.50 |
| ILMN_2311674 | ADCY6    | -0.56 | 7.89  | -10.63 | 5.14E-18 | 2.65E-15 | 30.50 |
| ILMN_2307861 | COL6A3   | 1.38  | 9.37  | 10.62  | 5.43E-18 | 2.75E-15 | 30.45 |
| ILMN_2094952 | NUAK2    | -0.59 | 7.35  | -10.59 | 6.31E-18 | 3.15E-15 | 30.30 |
| ILMN_1767481 | ATP23    | -0.69 | 8.06  | -10.58 | 6.59E-18 | 3.21E-15 | 30.26 |
| ILMN_2184184 | ANXA1    | 1.52  | 9.59  | 10.58  | 6.62E-18 | 3.21E-15 | 30.26 |
| ILMN_2355831 | FHL2     | 0.66  | 10.89 | 10.57  | 6.88E-18 | 3.30E-15 | 30.22 |
| ILMN_1722713 | FBLN1    | 0.78  | 7.52  | 10.57  | 7.17E-18 | 3.38E-15 | 30.18 |
| ILMN_1707124 | TFPI     | 0.82  | 8.20  | 10.54  | 8.00E-18 | 3.68E-15 | 30.07 |
| ILMN_1773395 | NA       | -0.69 | 7.83  | -10.55 | 7.95E-18 | 3.68E-15 | 30.08 |
| ILMN_2098743 | ACOT13   | -0.82 | 8.71  | -10.56 | 8.16E-18 | 3.70E-15 | 30.05 |
| ILMN_1771403 | PWWP2A   | -0.37 | 7.38  | -10.52 | 8.95E-18 | 4.01E-15 | 29.96 |
| ILMN_1653504 | S1PR1    | 0.67  | 7.32  | 10.46  | 1.23E-17 | 5.41E-15 | 29.65 |
| ILMN_1803988 | MCL1     | 0.82  | 9.40  | 10.46  | 1.24E-17 | 5.41E-15 | 29.64 |
| ILMN_1723522 | APOLD1   | 1.07  | 7.38  | 10.47  | 1.28E-17 | 5.50E-15 | 29.61 |
| ILMN_2096719 | GRK5     | 0.82  | 8.68  | 10.41  | 1.55E-17 | 6.58E-15 | 29.43 |
| ILMN_2346997 | RAB23    | 0.66  | 8.67  | 10.41  | 1.58E-17 | 6.63E-15 | 29.41 |
| ILMN_1725090 | CTHRC1   | 0.87  | 7.35  | 10.41  | 1.60E-17 | 6.65E-15 | 29.39 |
| ILMN_1813846 | P2RX4    | -0.79 | 8.27  | -10.40 | 1.63E-17 | 6.71E-15 | 29.37 |
| ILMN_1706511 | TEF      | -0.67 | 7.25  | -10.40 | 1.69E-17 | 6.84E-15 | 29.34 |
| ILMN_2210753 | LYVE1    | 0.63  | 6.67  | 10.39  | 1.74E-17 | 6.97E-15 | 29.31 |
| ILMN_1733270 | CD163    | 0.81  | 7.15  | 10.37  | 1.87E-17 | 7.40E-15 | 29.24 |
| ILMN_2218208 | SPARCL1  | 1.00  | 10.16 | 10.37  | 1.91E-17 | 7.49E-15 | 29.22 |
| ILMN_1698732 | PALLD    | 0.68  | 10.03 | 10.35  | 2.08E-17 | 7.95E-15 | 29.14 |
| ILMN_3227263 | SLC22A23 | -0.67 | 8.61  | -10.35 | 2.07E-17 | 7.95E-15 | 29.14 |
| ILMN_1732831 | CHST7    | 0.53  | 7.47  | 10.34  | 2.23E-17 | 8.44E-15 | 29.07 |
| ILMN_1766657 | STOM     | 1.00  | 10.01 | 10.33  | 2.32E-17 | 8.69E-15 | 29.03 |
| ILMN_2201678 | FSTL1    | 1.00  | 8.18  | 10.33  | 2.34E-17 | 8.69E-15 | 29.02 |
| ILMN_1665372 | FXD3     | -1.23 | 8.46  | -10.32 | 2.40E-17 | 8.79E-15 | 29.00 |

|              |          |       |       |        |          |          |       |
|--------------|----------|-------|-------|--------|----------|----------|-------|
| ILMN_1672536 | FBLN1    | 1.09  | 10.46 | 10.29  | 2.80E-17 | 1.01E-14 | 28.85 |
| ILMN_2149226 | CAV1     | 1.06  | 9.61  | 10.28  | 2.93E-17 | 1.05E-14 | 28.80 |
| ILMN_1682147 | HOOK2    | -0.51 | 7.89  | -10.24 | 3.59E-17 | 1.26E-14 | 28.60 |
| ILMN_1752755 | VWF      | 0.91  | 9.64  | 10.27  | 3.58E-17 | 1.26E-14 | 28.61 |
| ILMN_1722438 | MGAT4B   | -0.65 | 7.36  | -10.23 | 3.79E-17 | 1.31E-14 | 28.55 |
| ILMN_1722622 | CD163    | 1.32  | 7.98  | 10.25  | 3.81E-17 | 1.31E-14 | 28.55 |
| ILMN_1657679 | VAV3     | -1.04 | 8.74  | -10.22 | 3.96E-17 | 1.35E-14 | 28.51 |
| ILMN_1762033 | NAPEPLD  | -0.46 | 7.35  | -10.22 | 4.08E-17 | 1.36E-14 | 28.47 |
| ILMN_1803217 | GPRIN2   | -0.70 | 7.33  | -10.22 | 4.04E-17 | 1.36E-14 | 28.49 |
| ILMN_2391150 | FILIP1L  | 0.94  | 7.84  | 10.22  | 4.10E-17 | 1.36E-14 | 28.47 |
| ILMN_1667966 | FAM129A  | 0.93  | 8.35  | 10.21  | 4.17E-17 | 1.37E-14 | 28.45 |
| ILMN_1729455 | EML1     | 0.94  | 7.65  | 10.20  | 4.37E-17 | 1.42E-14 | 28.41 |
| ILMN_1726589 | CD248    | 0.86  | 7.51  | 10.20  | 4.54E-17 | 1.46E-14 | 28.37 |
| ILMN_2342835 | P2RY14   | 0.58  | 6.92  | 10.19  | 4.61E-17 | 1.47E-14 | 28.36 |
| ILMN_1681983 | RSPO3    | 0.84  | 7.39  | 10.20  | 4.98E-17 | 1.57E-14 | 28.28 |
| ILMN_1695290 | FERMT2   | 0.98  | 8.79  | 10.18  | 5.03E-17 | 1.58E-14 | 28.27 |
| ILMN_1730487 | CALD1    | 1.00  | 10.01 | 10.17  | 5.11E-17 | 1.59E-14 | 28.26 |
| ILMN_1672042 | DOLPP1   | -0.51 | 7.82  | -10.17 | 5.23E-17 | 1.61E-14 | 28.23 |
| ILMN_1757552 | PTRF     | 1.02  | 9.92  | 10.16  | 5.49E-17 | 1.67E-14 | 28.19 |
| ILMN_1660691 | RAB31    | 1.06  | 9.11  | 10.13  | 6.28E-17 | 1.88E-14 | 28.05 |
| ILMN_1792679 | ITGA5    | 1.20  | 7.53  | 10.13  | 6.24E-17 | 1.88E-14 | 28.06 |
| ILMN_1706643 | COL6A3   | 1.35  | 10.24 | 10.11  | 6.82E-17 | 2.03E-14 | 27.97 |
| ILMN_1679051 | PTPRR    | -1.15 | 7.86  | -10.09 | 7.68E-17 | 2.26E-14 | 27.86 |
| ILMN_1682717 | IER3     | 1.38  | 9.83  | 10.08  | 8.24E-17 | 2.37E-14 | 27.79 |
| ILMN_1764723 | SH3PXD2B | 0.54  | 7.02  | 10.08  | 8.24E-17 | 2.37E-14 | 27.79 |
| ILMN_2060115 | SORL1    | -0.81 | 8.29  | -10.08 | 8.11E-17 | 2.37E-14 | 27.80 |
| ILMN_1700541 | FBLN1    | 0.93  | 9.03  | 10.07  | 8.38E-17 | 2.39E-14 | 27.77 |
| ILMN_2171481 | NXPE1    | -1.15 | 8.08  | -10.06 | 8.99E-17 | 2.54E-14 | 27.70 |
| ILMN_1756071 | MFGE8    | 0.76  | 9.75  | 10.06  | 9.12E-17 | 2.56E-14 | 27.69 |
| ILMN_2041788 | PLS3     | 0.56  | 8.83  | 10.05  | 9.62E-17 | 2.67E-14 | 27.64 |
| ILMN_2082273 | RGS5     | 0.93  | 7.97  | 10.04  | 1.01E-16 | 2.79E-14 | 27.58 |
| ILMN_1701933 | SNCA     | 0.51  | 6.97  | 9.99   | 1.29E-16 | 3.49E-14 | 27.35 |
| ILMN_1730906 | FILIP1L  | 0.97  | 7.84  | 9.99   | 1.29E-16 | 3.49E-14 | 27.35 |
| ILMN_1687315 | RXRA     | -0.64 | 9.35  | -9.98  | 1.34E-16 | 3.60E-14 | 27.32 |
| ILMN_1801307 | TNFSF10  | -0.83 | 9.24  | -9.98  | 1.36E-16 | 3.64E-14 | 27.29 |
| ILMN_1737314 | BCL6     | 1.14  | 8.34  | 9.97   | 1.40E-16 | 3.72E-14 | 27.27 |
| ILMN_1788267 | PPP1R14D | -0.93 | 8.31  | -9.96  | 1.49E-16 | 3.93E-14 | 27.21 |
| ILMN_1721876 | TIMP2    | 0.87  | 10.14 | 9.95   | 1.58E-16 | 4.10E-14 | 27.15 |
| ILMN_1819608 | ARRB1    | -0.57 | 8.06  | -9.95  | 1.58E-16 | 4.10E-14 | 27.15 |
| ILMN_1736700 | ALDOA    | -0.69 | 11.00 | -9.94  | 1.61E-16 | 4.13E-14 | 27.13 |
| ILMN_1696643 | TLN1     | 0.42  | 7.87  | 9.94   | 1.65E-16 | 4.21E-14 | 27.11 |
| ILMN_2337263 | PKIB     | -1.37 | 8.74  | -9.93  | 1.69E-16 | 4.28E-14 | 27.08 |
| ILMN_1805842 | FHL1     | 1.24  | 8.79  | 9.91   | 1.87E-16 | 4.70E-14 | 26.99 |
| ILMN_1715748 | FLNC     | 1.34  | 7.92  | 9.90   | 1.99E-16 | 4.98E-14 | 26.92 |
| ILMN_1721770 | PAPPA    | 0.86  | 7.35  | 9.90   | 2.04E-16 | 5.06E-14 | 26.90 |
| ILMN_1735157 | GALNT12  | -1.09 | 8.81  | -9.88  | 2.20E-16 | 5.39E-14 | 26.82 |
| ILMN_1776516 | ITPKA    | -1.01 | 9.01  | -9.88  | 2.19E-16 | 5.39E-14 | 26.83 |
| ILMN_1797557 | PLEKHA6  | -0.64 | 7.97  | -9.87  | 2.27E-16 | 5.52E-14 | 26.79 |

|              |          |       |       |       |          |          |       |
|--------------|----------|-------|-------|-------|----------|----------|-------|
| ILMN_1716988 | OPN3     | -0.64 | 7.69  | -9.86 | 2.42E-16 | 5.77E-14 | 26.73 |
| ILMN_1796925 | CXADR    | -0.84 | 9.56  | -9.86 | 2.42E-16 | 5.77E-14 | 26.73 |
| ILMN_2055156 | PAG1     | -0.62 | 8.43  | -9.88 | 2.42E-16 | 5.77E-14 | 26.73 |
| ILMN_1705116 | SLC22A23 | -0.73 | 9.26  | -9.86 | 2.45E-16 | 5.77E-14 | 26.72 |
| ILMN_2081682 | SMAP2    | 1.09  | 9.77  | 9.87  | 2.51E-16 | 5.88E-14 | 26.70 |
| ILMN_1671478 | CKB      | -1.95 | 10.73 | -9.85 | 2.54E-16 | 5.92E-14 | 26.69 |
| ILMN_1704446 | SLC6A10P | -0.99 | 8.58  | -9.85 | 2.56E-16 | 5.93E-14 | 26.68 |
| ILMN_1704730 | CD93     | 1.05  | 8.79  | 9.85  | 2.59E-16 | 5.95E-14 | 26.67 |
| ILMN_1672591 | SCN9A    | -0.55 | 7.07  | -9.84 | 2.74E-16 | 6.24E-14 | 26.61 |
| ILMN_1677402 | C11orf96 | 1.86  | 9.03  | 9.84  | 2.75E-16 | 6.24E-14 | 26.61 |
| ILMN_2199389 | VIPR1    | -1.20 | 9.30  | -9.83 | 2.83E-16 | 6.38E-14 | 26.58 |
| ILMN_2379599 | CD163    | 1.39  | 7.99  | 9.82  | 2.93E-16 | 6.56E-14 | 26.55 |
| ILMN_1672504 | PDXK     | -0.63 | 9.68  | -9.82 | 3.01E-16 | 6.70E-14 | 26.52 |
| ILMN_1784287 | TGFBR3   | 1.00  | 8.73  | 9.81  | 3.07E-16 | 6.78E-14 | 26.50 |
| ILMN_1653028 | COL4A1   | 1.17  | 10.04 | 9.76  | 3.97E-16 | 8.73E-14 | 26.25 |
| ILMN_1764571 | ARHGAP23 | 0.54  | 7.33  | 9.75  | 4.12E-16 | 9.00E-14 | 26.21 |
| ILMN_2347145 | DCN      | 1.35  | 11.40 | 9.75  | 4.22E-16 | 9.15E-14 | 26.19 |
| ILMN_1664283 | TPRN     | -0.57 | 7.63  | -9.74 | 4.40E-16 | 9.48E-14 | 26.15 |
| ILMN_1717599 | CNTN3    | -0.49 | 6.77  | -9.73 | 4.61E-16 | 9.88E-14 | 26.10 |
| ILMN_1656011 | RGS1     | 1.92  | 8.50  | 9.72  | 4.80E-16 | 1.02E-13 | 26.06 |
| ILMN_1779882 | SOWAHA   | -0.92 | 7.95  | -9.72 | 4.83E-16 | 1.02E-13 | 26.06 |
| ILMN_2128750 | PTTG1IP  | -0.42 | 11.40 | -9.72 | 4.87E-16 | 1.02E-13 | 26.05 |
| ILMN_2367753 | ATP2B4   | 0.63  | 8.15  | 9.72  | 4.96E-16 | 1.04E-13 | 26.03 |
| ILMN_1663648 | MTUS1    | 0.37  | 6.69  | 9.70  | 5.36E-16 | 1.11E-13 | 25.96 |
| ILMN_1803528 | LRRC31   | -0.95 | 8.77  | -9.70 | 5.40E-16 | 1.11E-13 | 25.95 |
| ILMN_1727194 | CALU     | 0.69  | 8.17  | 9.69  | 5.71E-16 | 1.17E-13 | 25.89 |
| ILMN_1779185 | SPECC1L  | -0.63 | 9.68  | -9.68 | 5.88E-16 | 1.19E-13 | 25.86 |
| ILMN_3292448 | BTNL8    | -0.71 | 7.31  | -9.68 | 5.88E-16 | 1.19E-13 | 25.86 |
| ILMN_2129161 | LRRC32   | 0.55  | 7.74  | 9.65  | 6.98E-16 | 1.41E-13 | 25.70 |
| ILMN_1670638 | PITPNC1  | 0.62  | 7.37  | 9.66  | 7.14E-16 | 1.43E-13 | 25.68 |
| ILMN_2283772 | HEPACAM2 | -0.69 | 6.92  | -9.64 | 7.19E-16 | 1.43E-13 | 25.67 |
| ILMN_1679262 | DPYSL3   | 0.96  | 9.32  | 9.63  | 7.85E-16 | 1.55E-13 | 25.58 |
| ILMN_1751346 | ERBB3    | -0.99 | 9.20  | -9.62 | 8.21E-16 | 1.62E-13 | 25.54 |
| ILMN_3244176 | MIR100HG | 0.87  | 7.62  | 9.61  | 8.32E-16 | 1.63E-13 | 25.52 |
| ILMN_2066151 | TEK      | 0.53  | 7.62  | 9.59  | 9.28E-16 | 1.81E-13 | 25.42 |
| ILMN_1758939 | RIPK2    | 0.67  | 7.67  | 9.58  | 9.65E-16 | 1.87E-13 | 25.38 |
| ILMN_2411745 | EML1     | 0.58  | 7.09  | 9.58  | 9.75E-16 | 1.88E-13 | 25.37 |
| ILMN_3251409 | PDE6A    | -0.57 | 6.89  | -9.57 | 1.05E-15 | 2.02E-13 | 25.29 |
| ILMN_1782538 | VIM      | 1.07  | 10.99 | 9.57  | 1.06E-15 | 2.02E-13 | 25.28 |
| ILMN_1770338 | TM4SF1   | 1.20  | 10.67 | 9.57  | 1.13E-15 | 2.15E-13 | 25.22 |
| ILMN_1794638 | VIP      | 1.81  | 8.31  | 9.55  | 1.14E-15 | 2.15E-13 | 25.21 |
| ILMN_2228938 | ECM2     | 0.50  | 7.00  | 9.57  | 1.16E-15 | 2.18E-13 | 25.20 |
| ILMN_1731714 | CREB5    | 0.46  | 6.99  | 9.54  | 1.23E-15 | 2.29E-13 | 25.14 |
| ILMN_1783276 | NEXN     | 0.81  | 7.67  | 9.53  | 1.25E-15 | 2.31E-13 | 25.13 |
| ILMN_2058251 | VIM      | 1.15  | 10.10 | 9.53  | 1.28E-15 | 2.35E-13 | 25.11 |
| ILMN_1689518 | PECAM1   | 0.87  | 8.37  | 9.52  | 1.31E-15 | 2.40E-13 | 25.08 |
| ILMN_1700690 | VAT1     | 0.50  | 7.68  | 9.51  | 1.38E-15 | 2.50E-13 | 25.03 |
| ILMN_1730670 | FSTL3    | 0.48  | 6.85  | 9.51  | 1.38E-15 | 2.50E-13 | 25.03 |

|              |          |       |       |       |          |          |       |
|--------------|----------|-------|-------|-------|----------|----------|-------|
| ILMN_1799015 | PXMP2    | -1.00 | 8.88  | -9.51 | 1.38E-15 | 2.50E-13 | 25.03 |
| ILMN_1680579 | ATP2B4   | 0.59  | 8.25  | 9.50  | 1.46E-15 | 2.59E-13 | 24.97 |
| ILMN_1734190 | TCEAL3   | 0.68  | 8.63  | 9.50  | 1.46E-15 | 2.59E-13 | 24.97 |
| ILMN_1737025 | PLCL2    | -0.50 | 8.62  | -9.50 | 1.46E-15 | 2.59E-13 | 24.97 |
| ILMN_2078592 | ADTRP    | -1.34 | 9.02  | -9.50 | 1.46E-15 | 2.59E-13 | 24.98 |
| ILMN_1810559 | RHOQ     | 0.81  | 9.48  | 9.50  | 1.48E-15 | 2.60E-13 | 24.96 |
| ILMN_1721626 | ARID5B   | 1.00  | 9.22  | 9.48  | 1.60E-15 | 2.81E-13 | 24.88 |
| ILMN_3248551 | C2CD4B   | 1.03  | 7.43  | 9.48  | 1.63E-15 | 2.84E-13 | 24.86 |
| ILMN_1679797 | ADARB1   | 0.66  | 8.30  | 9.47  | 1.68E-15 | 2.92E-13 | 24.83 |
| ILMN_1736441 | PDXP     | -0.68 | 8.83  | -9.49 | 1.71E-15 | 2.95E-13 | 24.82 |
| ILMN_1674908 | HOXB5    | -1.10 | 9.67  | -9.45 | 1.86E-15 | 3.14E-13 | 24.74 |
| ILMN_1770811 | PELO     | 0.51  | 8.48  | 9.47  | 1.85E-15 | 3.14E-13 | 24.75 |
| ILMN_1788538 | NCALD    | 0.58  | 7.62  | 9.45  | 1.86E-15 | 3.14E-13 | 24.74 |
| ILMN_2285568 | NAAA     | -0.72 | 7.71  | -9.47 | 1.86E-15 | 3.14E-13 | 24.74 |
| ILMN_1750101 | S100A11  | 0.93  | 8.39  | 9.45  | 1.87E-15 | 3.15E-13 | 24.73 |
| ILMN_2376723 | CDKN2B   | -1.24 | 9.25  | -9.44 | 1.99E-15 | 3.33E-13 | 24.67 |
| ILMN_1788942 | GGT6     | -0.82 | 8.70  | -9.42 | 2.17E-15 | 3.61E-13 | 24.59 |
| ILMN_1712786 | AHCYL2   | -0.95 | 9.86  | -9.40 | 2.45E-15 | 4.02E-13 | 24.47 |
| ILMN_1736510 | FOXN2    | 0.48  | 8.75  | 9.40  | 2.45E-15 | 4.02E-13 | 24.47 |
| ILMN_1749478 | TCEAL3   | 0.59  | 7.76  | 9.40  | 2.46E-15 | 4.02E-13 | 24.46 |
| ILMN_1755657 | RASIP1   | 0.50  | 7.36  | 9.40  | 2.43E-15 | 4.02E-13 | 24.48 |
| ILMN_2370241 | TEX11    | -0.90 | 7.47  | -9.41 | 2.49E-15 | 4.05E-13 | 24.45 |
| ILMN_1756701 | DHRS11   | -1.31 | 9.80  | -9.39 | 2.53E-15 | 4.09E-13 | 24.44 |
| ILMN_2124585 | GREM1    | 0.82  | 7.09  | 9.38  | 2.63E-15 | 4.23E-13 | 24.40 |
| ILMN_1666444 | RBMS1    | 0.80  | 7.88  | 9.38  | 2.75E-15 | 4.41E-13 | 24.35 |
| ILMN_1727087 | GJA1     | 0.99  | 8.21  | 9.35  | 3.17E-15 | 5.05E-13 | 24.22 |
| ILMN_1803392 | NA       | -0.63 | 9.77  | -9.34 | 3.24E-15 | 5.15E-13 | 24.19 |
| ILMN_1672080 | NR2F6    | -0.69 | 9.07  | -9.34 | 3.29E-15 | 5.20E-13 | 24.18 |
| ILMN_1729801 | S100A8   | 2.01  | 7.92  | 9.34  | 3.30E-15 | 5.20E-13 | 24.17 |
| ILMN_1687652 | TGFB3    | 0.44  | 6.99  | 9.33  | 3.43E-15 | 5.38E-13 | 24.14 |
| ILMN_1725750 | NA       | -1.03 | 8.68  | -9.33 | 3.52E-15 | 5.49E-13 | 24.11 |
| ILMN_1654696 | C15orf48 | -1.12 | 9.13  | -9.32 | 3.60E-15 | 5.60E-13 | 24.09 |
| ILMN_2115125 | CTGF     | 1.43  | 9.20  | 9.35  | 3.68E-15 | 5.69E-13 | 24.07 |
| ILMN_1744937 | PTPRM    | 0.47  | 7.57  | 9.31  | 3.74E-15 | 5.75E-13 | 24.05 |
| ILMN_1776905 | TMEM236  | -1.60 | 9.06  | -9.31 | 3.83E-15 | 5.87E-13 | 24.03 |
| ILMN_1729216 | CRYAB    | 0.98  | 7.96  | 9.31  | 3.90E-15 | 5.96E-13 | 24.01 |
| ILMN_1664362 | SGIP1    | 0.51  | 6.78  | 9.30  | 3.94E-15 | 5.98E-13 | 24.00 |
| ILMN_1736901 | ZDHHC23  | -0.72 | 8.27  | -9.30 | 4.00E-15 | 6.04E-13 | 23.99 |
| ILMN_3245630 | ECSCR    | 0.50  | 7.15  | 9.29  | 4.23E-15 | 6.36E-13 | 23.93 |
| ILMN_1653278 | MUC20    | -0.97 | 8.56  | -9.28 | 4.34E-15 | 6.50E-13 | 23.91 |
| ILMN_1651950 | TPST1    | 0.53  | 6.95  | 9.28  | 4.36E-15 | 6.51E-13 | 23.90 |
| ILMN_1755954 | CPEB3    | -0.42 | 7.73  | -9.27 | 4.56E-15 | 6.77E-13 | 23.86 |
| ILMN_1658494 | RGCC     | 0.98  | 8.95  | 9.27  | 4.61E-15 | 6.82E-13 | 23.85 |
| ILMN_1752526 | RNF144B  | 0.47  | 7.00  | 9.27  | 4.68E-15 | 6.89E-13 | 23.83 |
| ILMN_1802251 | PTTG1IP  | -0.60 | 10.08 | -9.25 | 5.11E-15 | 7.49E-13 | 23.75 |
| ILMN_1651554 | RGS5     | 0.92  | 8.30  | 9.25  | 5.18E-15 | 7.50E-13 | 23.73 |
| ILMN_1685709 | TMEM125  | -0.61 | 8.43  | -9.25 | 5.17E-15 | 7.50E-13 | 23.74 |
| ILMN_1764109 | C1R      | 0.75  | 7.64  | 9.25  | 5.16E-15 | 7.50E-13 | 23.74 |

|              |           |       |       |       |          |          |       |
|--------------|-----------|-------|-------|-------|----------|----------|-------|
| ILMN_2344216 | STX2      | 0.51  | 7.36  | 9.24  | 5.29E-15 | 7.64E-13 | 23.71 |
| ILMN_1804593 | HEPACAM2  | -1.21 | 8.86  | -9.24 | 5.43E-15 | 7.80E-13 | 23.69 |
| ILMN_1707748 | PIM3      | 0.53  | 7.45  | 9.23  | 5.75E-15 | 8.16E-13 | 23.63 |
| ILMN_1769575 | JAM3      | 0.64  | 8.72  | 9.23  | 5.73E-15 | 8.16E-13 | 23.63 |
| ILMN_1794863 | CAMK2N1   | -0.89 | 11.58 | -9.23 | 5.71E-15 | 8.16E-13 | 23.64 |
| ILMN_1674135 | RALGPS1   | -0.60 | 8.19  | -9.22 | 5.90E-15 | 8.33E-13 | 23.61 |
| ILMN_1813295 | LMO3      | 0.76  | 7.00  | 9.22  | 6.01E-15 | 8.46E-13 | 23.59 |
| ILMN_1750974 | S100A9    | 1.87  | 8.17  | 9.21  | 6.26E-15 | 8.78E-13 | 23.55 |
| ILMN_1752810 | LARP6     | 0.42  | 6.85  | 9.20  | 6.58E-15 | 9.18E-13 | 23.50 |
| ILMN_1769299 | MTMR11    | -0.98 | 10.54 | -9.20 | 6.63E-15 | 9.21E-13 | 23.49 |
| ILMN_1717639 | SIK1      | 1.07  | 7.32  | 9.20  | 6.71E-15 | 9.30E-13 | 23.48 |
| ILMN_1792455 | TMEM158   | 1.17  | 8.89  | 9.19  | 7.05E-15 | 9.73E-13 | 23.43 |
| ILMN_1758895 | CTSK      | 0.98  | 8.96  | 9.17  | 7.53E-15 | 1.03E-12 | 23.37 |
| ILMN_1815319 | CMTM4     | -0.86 | 9.87  | -9.17 | 7.57E-15 | 1.04E-12 | 23.36 |
| ILMN_1789641 | ABCG2     | -0.76 | 6.98  | -9.17 | 7.77E-15 | 1.06E-12 | 23.34 |
| ILMN_2052863 | RNF5P1    | -0.34 | 7.29  | -9.15 | 8.34E-15 | 1.13E-12 | 23.27 |
| ILMN_2384241 | TGFBR2    | 0.67  | 9.99  | 9.15  | 8.41E-15 | 1.14E-12 | 23.26 |
| ILMN_1781626 | C1S       | 0.94  | 9.46  | 9.15  | 8.50E-15 | 1.14E-12 | 23.25 |
| ILMN_1785821 | TDP2      | -0.63 | 7.44  | -9.15 | 8.66E-15 | 1.16E-12 | 23.23 |
| ILMN_2290618 | SEC22C    | 0.49  | 7.78  | 9.16  | 8.83E-15 | 1.18E-12 | 23.22 |
| ILMN_1664176 | FBLN5     | 0.39  | 7.02  | 9.15  | 8.99E-15 | 1.20E-12 | 23.20 |
| ILMN_1714197 | ACSS2     | -0.90 | 10.96 | -9.14 | 9.13E-15 | 1.21E-12 | 23.18 |
| ILMN_1780170 | APOD      | 1.33  | 7.85  | 9.15  | 9.19E-15 | 1.21E-12 | 23.18 |
| ILMN_1667711 | PLA2G16   | 0.82  | 7.68  | 9.13  | 9.47E-15 | 1.25E-12 | 23.14 |
| ILMN_1748899 | TMED6     | -0.57 | 7.18  | -9.13 | 9.52E-15 | 1.25E-12 | 23.14 |
| ILMN_1765076 | APPL2     | -0.84 | 9.95  | -9.12 | 9.70E-15 | 1.26E-12 | 23.12 |
| ILMN_2120695 | TSPAN7    | -0.86 | 9.87  | -9.12 | 9.67E-15 | 1.26E-12 | 23.12 |
| ILMN_2370336 | MS4A4A    | 0.53  | 6.91  | 9.12  | 9.82E-15 | 1.27E-12 | 23.11 |
| ILMN_1721283 | HSPB6     | 0.78  | 7.13  | 9.12  | 9.86E-15 | 1.27E-12 | 23.10 |
| ILMN_1688633 | CLCN2     | -0.57 | 7.17  | -9.13 | 1.01E-14 | 1.29E-12 | 23.08 |
| ILMN_1729453 | TSPAN9    | 0.43  | 8.80  | 9.12  | 1.01E-14 | 1.29E-12 | 23.08 |
| ILMN_1808590 | GUCY1A3   | 0.79  | 7.72  | 9.11  | 1.02E-14 | 1.30E-12 | 23.07 |
| ILMN_1729117 | COL5A2    | 0.96  | 8.99  | 9.11  | 1.02E-14 | 1.30E-12 | 23.07 |
| ILMN_1753954 | OLFM4     | 1.80  | 8.40  | 9.11  | 1.06E-14 | 1.34E-12 | 23.03 |
| ILMN_1784967 | EPB41L4B  | -0.89 | 8.03  | -9.11 | 1.06E-14 | 1.34E-12 | 23.04 |
| ILMN_1735930 | KLF2      | 0.91  | 10.28 | 9.09  | 1.12E-14 | 1.41E-12 | 22.98 |
| ILMN_1685057 | SLC22A4   | -0.32 | 6.87  | -9.09 | 1.14E-14 | 1.43E-12 | 22.96 |
| ILMN_1778941 | NA        | -0.35 | 6.68  | -9.09 | 1.15E-14 | 1.44E-12 | 22.95 |
| ILMN_1664738 | C11orf54  | -0.43 | 7.54  | -9.08 | 1.22E-14 | 1.52E-12 | 22.89 |
| ILMN_2142185 | CLEC14A   | 0.53  | 7.53  | 9.08  | 1.22E-14 | 1.52E-12 | 22.89 |
| ILMN_1745994 | GAS7      | 0.45  | 7.32  | 9.07  | 1.24E-14 | 1.53E-12 | 22.88 |
| ILMN_1679133 | SERPINB1  | 0.72  | 10.01 | 9.06  | 1.36E-14 | 1.67E-12 | 22.79 |
| ILMN_1690125 | PDLIM7    | 0.39  | 6.76  | 9.06  | 1.36E-14 | 1.67E-12 | 22.79 |
| ILMN_1880280 | FOXP1-IT1 | -0.59 | 8.22  | -9.05 | 1.40E-14 | 1.71E-12 | 22.76 |
| ILMN_1808356 | FAM3A     | -0.43 | 9.81  | -9.04 | 1.45E-14 | 1.77E-12 | 22.73 |
| ILMN_2410421 | NBPF1     | -0.46 | 7.09  | -9.03 | 1.51E-14 | 1.84E-12 | 22.69 |
| ILMN_2185984 | SASH1     | 0.64  | 8.22  | 9.03  | 1.55E-14 | 1.87E-12 | 22.66 |
| ILMN_1754103 | CLDN11    | 0.49  | 6.98  | 9.03  | 1.58E-14 | 1.90E-12 | 22.64 |

|              |          |       |       |       |          |          |       |
|--------------|----------|-------|-------|-------|----------|----------|-------|
| ILMN_1654392 | KHNYN    | -0.37 | 7.79  | -9.02 | 1.64E-14 | 1.97E-12 | 22.61 |
| ILMN_1760347 | SRGN     | 1.65  | 10.00 | 9.01  | 1.68E-14 | 2.01E-12 | 22.58 |
| ILMN_1683194 | DCN      | 1.23  | 8.26  | 9.01  | 1.73E-14 | 2.06E-12 | 22.56 |
| ILMN_1691942 | CCNI     | 0.33  | 11.79 | 9.01  | 1.74E-14 | 2.06E-12 | 22.55 |
| ILMN_1815023 | PIM1     | 0.81  | 7.89  | 9.01  | 1.74E-14 | 2.06E-12 | 22.55 |
| ILMN_2302716 | ALDH18A1 | -0.62 | 8.85  | -9.01 | 1.74E-14 | 2.06E-12 | 22.55 |
| ILMN_1713764 | NA       | -1.02 | 8.92  | -9.00 | 1.77E-14 | 2.08E-12 | 22.53 |
| ILMN_2052373 | RAB17    | -0.98 | 8.72  | -9.01 | 1.82E-14 | 2.13E-12 | 22.51 |
| ILMN_3245983 | NEURL1B  | -0.94 | 8.59  | -9.01 | 1.82E-14 | 2.13E-12 | 22.51 |
| ILMN_1739813 | HYAL1    | 1.21  | 8.37  | 9.00  | 1.83E-14 | 2.13E-12 | 22.50 |
| ILMN_2059689 | TMEM54   | -0.85 | 10.27 | -8.99 | 1.89E-14 | 2.19E-12 | 22.47 |
| ILMN_1810915 | FAAH     | -0.60 | 7.63  | -8.99 | 1.92E-14 | 2.22E-12 | 22.45 |
| ILMN_2118229 | NAPEPLD  | -0.64 | 8.18  | -9.00 | 1.94E-14 | 2.23E-12 | 22.45 |
| ILMN_1826471 | NA       | -0.54 | 7.52  | -8.98 | 1.97E-14 | 2.27E-12 | 22.43 |
| ILMN_1675612 | BLCAP    | -0.51 | 8.40  | -8.98 | 2.00E-14 | 2.29E-12 | 22.41 |
| ILMN_1679401 | TRPM4    | -0.81 | 9.75  | -8.97 | 2.04E-14 | 2.33E-12 | 22.39 |
| ILMN_1665696 | EFNA4    | -0.31 | 7.13  | -8.97 | 2.07E-14 | 2.36E-12 | 22.38 |
| ILMN_1671791 | PCK2     | -0.76 | 9.01  | -8.97 | 2.09E-14 | 2.36E-12 | 22.37 |
| ILMN_1683598 | ACSL4    | 1.08  | 8.33  | 8.99  | 2.08E-14 | 2.36E-12 | 22.38 |
| ILMN_1720606 | LRCH2    | 0.53  | 6.98  | 8.97  | 2.12E-14 | 2.39E-12 | 22.35 |
| ILMN_1810725 | FAM129A  | 0.88  | 8.06  | 8.96  | 2.15E-14 | 2.41E-12 | 22.34 |
| ILMN_1694432 | CRIP2    | 0.62  | 7.61  | 8.95  | 2.26E-14 | 2.53E-12 | 22.29 |
| ILMN_1785272 | COL1A2   | 1.23  | 10.20 | 8.97  | 2.28E-14 | 2.55E-12 | 22.29 |
| ILMN_1685156 | ADCY6    | -0.65 | 8.56  | -8.95 | 2.34E-14 | 2.60E-12 | 22.26 |
| ILMN_1792456 | CFAP36   | 0.32  | 7.52  | 8.95  | 2.34E-14 | 2.60E-12 | 22.26 |
| ILMN_2136147 | BCAS1    | -0.89 | 9.59  | -8.94 | 2.47E-14 | 2.73E-12 | 22.20 |
| ILMN_1691436 | BLVRA    | 0.72  | 8.20  | 8.92  | 2.66E-14 | 2.92E-12 | 22.13 |
| ILMN_3244114 | DHRS11   | -1.23 | 8.89  | -8.92 | 2.70E-14 | 2.97E-12 | 22.12 |
| ILMN_2295987 | NBPF1    | -0.38 | 6.79  | -8.92 | 2.73E-14 | 2.99E-12 | 22.11 |
| ILMN_3307906 | PALMD    | 0.41  | 6.84  | 8.90  | 2.89E-14 | 3.15E-12 | 22.05 |
| ILMN_1781468 | SMAP2    | 0.79  | 7.72  | 8.90  | 2.90E-14 | 3.16E-12 | 22.05 |
| ILMN_1716616 | MARVELD3 | -0.69 | 7.90  | -8.90 | 3.00E-14 | 3.25E-12 | 22.02 |
| ILMN_1661777 | NR3C2    | -0.62 | 8.00  | -8.89 | 3.08E-14 | 3.33E-12 | 21.99 |
| ILMN_1735045 | A4GALT   | 0.39  | 6.70  | 8.89  | 3.14E-14 | 3.38E-12 | 21.97 |
| ILMN_1670385 | TUBAL3   | -1.03 | 8.27  | -8.88 | 3.19E-14 | 3.43E-12 | 21.96 |
| ILMN_1747775 | STX2     | 0.45  | 7.34  | 8.88  | 3.27E-14 | 3.50E-12 | 21.93 |
| ILMN_1697548 | ADGRL2   | 0.59  | 7.92  | 8.88  | 3.33E-14 | 3.55E-12 | 21.91 |
| ILMN_1772910 | GAS1     | 0.61  | 6.96  | 8.89  | 3.39E-14 | 3.60E-12 | 21.90 |
| ILMN_1722869 | PDZD3    | -1.07 | 8.60  | -8.87 | 3.42E-14 | 3.62E-12 | 21.89 |
| ILMN_2188264 | CYR61    | 1.74  | 8.25  | 8.87  | 3.43E-14 | 3.62E-12 | 21.89 |
| ILMN_1703123 | CSRN1    | 0.94  | 8.55  | 8.87  | 3.47E-14 | 3.66E-12 | 21.87 |
| ILMN_1720113 | PTPRO    | -0.89 | 7.72  | -8.88 | 3.48E-14 | 3.66E-12 | 21.87 |
| ILMN_1748625 | TCEAL4   | 0.65  | 9.60  | 8.87  | 3.50E-14 | 3.67E-12 | 21.86 |
| ILMN_1670305 | SERPING1 | 0.72  | 7.82  | 8.86  | 3.53E-14 | 3.68E-12 | 21.86 |
| ILMN_1670490 | PDPN     | 0.93  | 7.60  | 8.86  | 3.53E-14 | 3.68E-12 | 21.86 |
| ILMN_1784176 | ABCA5    | -0.45 | 7.05  | -8.85 | 3.73E-14 | 3.87E-12 | 21.80 |
| ILMN_2206746 | BGN      | 1.11  | 9.58  | 8.85  | 3.75E-14 | 3.89E-12 | 21.80 |
| ILMN_1791576 | CHSY1    | 0.78  | 8.99  | 8.85  | 3.78E-14 | 3.90E-12 | 21.79 |

|              |           |       |       |       |          |          |       |
|--------------|-----------|-------|-------|-------|----------|----------|-------|
| ILMN_1711566 | TIMP1     | 1.17  | 10.89 | 8.85  | 3.82E-14 | 3.94E-12 | 21.78 |
| ILMN_1768110 | ZAK       | 0.95  | 8.64  | 8.85  | 3.84E-14 | 3.94E-12 | 21.77 |
| ILMN_1792689 | HIST1H2AC | -0.76 | 8.05  | -8.84 | 3.88E-14 | 3.97E-12 | 21.76 |
| ILMN_3245591 | DIO3OS    | -0.59 | 7.09  | -8.84 | 3.90E-14 | 3.98E-12 | 21.76 |
| ILMN_1694589 | PAQR8     | -0.89 | 9.70  | -8.84 | 3.98E-14 | 4.03E-12 | 21.74 |
| ILMN_1794588 | DYRK2     | -0.61 | 8.92  | -8.85 | 3.97E-14 | 4.03E-12 | 21.74 |
| ILMN_1713688 | DHX32     | -0.46 | 9.38  | -8.84 | 4.01E-14 | 4.05E-12 | 21.73 |
| ILMN_1808238 | RBPM52    | 0.82  | 7.42  | 8.84  | 4.01E-14 | 4.05E-12 | 21.73 |
| ILMN_1717046 | MOB3B     | -0.58 | 7.98  | -8.84 | 4.03E-14 | 4.05E-12 | 21.73 |
| ILMN_1734478 | PIP5K1B   | -0.44 | 7.41  | -8.83 | 4.14E-14 | 4.14E-12 | 21.70 |
| ILMN_1666004 | WASL      | -0.47 | 10.37 | -8.83 | 4.23E-14 | 4.22E-12 | 21.68 |
| ILMN_1789166 | SHD       | -0.51 | 7.10  | -8.83 | 4.23E-14 | 4.22E-12 | 21.68 |
| ILMN_3245057 | ASAP1     | 0.62  | 8.98  | 8.83  | 4.27E-14 | 4.24E-12 | 21.67 |
| ILMN_2094875 | NA        | -1.10 | 7.91  | -8.82 | 4.32E-14 | 4.28E-12 | 21.66 |
| ILMN_2083567 | PHLPP2    | -0.91 | 8.11  | -8.82 | 4.41E-14 | 4.35E-12 | 21.64 |
| ILMN_1665510 | ERRFI1    | 1.16  | 9.13  | 8.82  | 4.45E-14 | 4.38E-12 | 21.63 |
| ILMN_2223941 | FBLN5     | 0.44  | 7.32  | 8.82  | 4.47E-14 | 4.39E-12 | 21.63 |
| ILMN_1771734 | GMPS      | 0.42  | 8.68  | 8.81  | 4.53E-14 | 4.43E-12 | 21.61 |
| ILMN_2173004 | RAB8B     | 0.77  | 8.44  | 8.81  | 4.59E-14 | 4.48E-12 | 21.60 |
| ILMN_1704353 | IGSF3     | -0.69 | 8.33  | -8.81 | 4.62E-14 | 4.50E-12 | 21.59 |
| ILMN_1762718 | CMTM4     | -0.72 | 8.61  | -8.81 | 4.67E-14 | 4.54E-12 | 21.58 |
| ILMN_1672878 | ABR       | -0.55 | 10.55 | -8.81 | 4.69E-14 | 4.54E-12 | 21.58 |
| ILMN_1660806 | CSRP2     | 0.65  | 7.91  | 8.80  | 4.74E-14 | 4.57E-12 | 21.57 |
| ILMN_1789400 | FOXD2     | -1.12 | 8.73  | -8.82 | 4.74E-14 | 4.57E-12 | 21.57 |
| ILMN_1760490 | ACVR1     | 0.46  | 8.54  | 8.80  | 4.78E-14 | 4.59E-12 | 21.56 |
| ILMN_3246401 | AIF1L     | 0.59  | 8.37  | 8.80  | 4.93E-14 | 4.72E-12 | 21.53 |
| ILMN_1785356 | DENND5A   | 0.62  | 7.85  | 8.79  | 5.04E-14 | 4.81E-12 | 21.51 |
| ILMN_1771467 | TMIGD1    | -1.76 | 8.99  | -8.80 | 5.27E-14 | 5.02E-12 | 21.47 |
| ILMN_1748591 | ODC1      | 0.93  | 9.63  | 8.78  | 5.35E-14 | 5.08E-12 | 21.45 |
| ILMN_1718718 | MKKS      | -0.48 | 8.83  | -8.79 | 5.42E-14 | 5.14E-12 | 21.44 |
| ILMN_1666536 | VSIG2     | -1.21 | 10.45 | -8.78 | 5.44E-14 | 5.14E-12 | 21.43 |
| ILMN_2149164 | SFRP1     | 1.34  | 7.87  | 8.77  | 5.53E-14 | 5.21E-12 | 21.42 |
| ILMN_2314417 | HYAL1     | 0.70  | 7.04  | 8.77  | 5.56E-14 | 5.22E-12 | 21.41 |
| ILMN_1799280 | BDH1      | -0.57 | 7.46  | -8.77 | 5.59E-14 | 5.23E-12 | 21.41 |
| ILMN_1659544 | STX3      | -0.61 | 9.08  | -8.77 | 5.62E-14 | 5.25E-12 | 21.40 |
| ILMN_2336595 | ACSS2     | -0.92 | 10.82 | -8.76 | 5.80E-14 | 5.41E-12 | 21.37 |
| ILMN_2142353 | GRTP1     | -0.65 | 8.05  | -8.76 | 6.02E-14 | 5.59E-12 | 21.33 |
| ILMN_1667239 | INPP1     | 0.69  | 9.19  | 8.76  | 6.04E-14 | 5.59E-12 | 21.33 |
| ILMN_1738401 | FOXC1     | 0.66  | 7.16  | 8.76  | 6.22E-14 | 5.75E-12 | 21.30 |
| ILMN_1801767 | ABHD3     | -0.78 | 8.97  | -8.74 | 6.51E-14 | 6.00E-12 | 21.26 |
| ILMN_1656369 | C8orf4    | 1.36  | 8.66  | 8.74  | 6.60E-14 | 6.07E-12 | 21.24 |
| ILMN_1656111 | MYLIP     | -0.58 | 9.34  | -8.73 | 6.75E-14 | 6.19E-12 | 21.22 |
| ILMN_1774334 | HIGD2A    | -0.41 | 10.29 | -8.73 | 6.95E-14 | 6.36E-12 | 21.19 |
| ILMN_2345898 | SLA       | 0.82  | 7.94  | 8.74  | 6.97E-14 | 6.36E-12 | 21.19 |
| ILMN_1662419 | COX7A1    | 0.63  | 7.70  | 8.72  | 7.16E-14 | 6.51E-12 | 21.16 |
| ILMN_2150654 | ZSWIM4    | 0.47  | 7.66  | 8.72  | 7.19E-14 | 6.52E-12 | 21.16 |
| ILMN_2210934 | NR3C2     | -0.78 | 9.60  | -8.72 | 7.21E-14 | 6.52E-12 | 21.16 |
| ILMN_1712075 | SYNM      | 1.23  | 8.14  | 8.72  | 7.26E-14 | 6.55E-12 | 21.15 |



|              |           |       |       |       |          |          |       |
|--------------|-----------|-------|-------|-------|----------|----------|-------|
| ILMN_1675062 | MYL9      | 0.96  | 7.74  | 8.72  | 7.29E-14 | 6.56E-12 | 21.15 |
| ILMN_1665884 | REP15     | -0.90 | 8.42  | -8.74 | 7.64E-14 | 6.86E-12 | 21.11 |
| ILMN_1733042 | BCAS1     | -0.85 | 9.25  | -8.71 | 7.74E-14 | 6.93E-12 | 21.09 |
| ILMN_2111237 | MN1       | 0.37  | 6.82  | 8.70  | 7.91E-14 | 7.07E-12 | 21.07 |
| ILMN_1756898 | COQ9      | -0.51 | 9.31  | -8.70 | 8.01E-14 | 7.13E-12 | 21.05 |
| ILMN_2397028 | SERPINB8  | 0.42  | 6.83  | 8.70  | 8.07E-14 | 7.17E-12 | 21.05 |
| ILMN_1737993 | ERBB3     | -0.45 | 7.22  | -8.69 | 8.33E-14 | 7.38E-12 | 21.02 |
| ILMN_1781010 | ARHGEF3   | 0.50  | 8.65  | 8.69  | 8.56E-14 | 7.57E-12 | 20.99 |
| ILMN_1702125 | HOXB7     | -0.59 | 8.54  | -8.68 | 8.69E-14 | 7.66E-12 | 20.97 |
| ILMN_1659895 | MSN       | 0.93  | 9.20  | 8.68  | 8.81E-14 | 7.75E-12 | 20.96 |
| ILMN_1726245 | TGFBR2    | 0.67  | 9.72  | 8.68  | 8.88E-14 | 7.79E-12 | 20.95 |
| ILMN_2167758 | CILP      | 0.58  | 6.81  | 8.68  | 8.97E-14 | 7.85E-12 | 20.94 |
| ILMN_1760593 | CRY1      | 0.51  | 7.51  | 8.67  | 9.09E-14 | 7.93E-12 | 20.93 |
| ILMN_1912185 | GPC6      | 0.74  | 8.06  | 8.67  | 9.10E-14 | 7.93E-12 | 20.93 |
| ILMN_1736112 | ARHGAP10  | 0.34  | 6.71  | 8.67  | 9.21E-14 | 7.98E-12 | 20.92 |
| ILMN_1803348 | EHBP1     | 0.45  | 8.28  | 8.67  | 9.20E-14 | 7.98E-12 | 20.92 |
| ILMN_1893697 | NA        | 0.40  | 7.00  | 8.67  | 9.30E-14 | 8.03E-12 | 20.91 |
| ILMN_1751561 | CAMK1D    | -0.52 | 7.44  | -8.67 | 9.46E-14 | 8.16E-12 | 20.89 |
| ILMN_1768925 | C1QTNF3   | 0.30  | 6.57  | 8.66  | 9.66E-14 | 8.31E-12 | 20.87 |
| ILMN_1731349 | HOXA13    | -0.56 | 7.76  | -8.66 | 9.75E-14 | 8.36E-12 | 20.86 |
| ILMN_1701877 | AXL       | 0.71  | 8.07  | 8.66  | 9.84E-14 | 8.42E-12 | 20.85 |
| ILMN_3239643 | LOC389332 | -0.55 | 7.18  | -8.65 | 9.98E-14 | 8.52E-12 | 20.84 |
| ILMN_1741003 | ANXA5     | 0.87  | 9.70  | 8.65  | 1.01E-13 | 8.56E-12 | 20.83 |
| ILMN_1674009 | TKTL1     | -0.60 | 7.34  | -8.67 | 1.01E-13 | 8.60E-12 | 20.83 |
| ILMN_1708107 | DPT       | 0.78  | 7.41  | 8.65  | 1.03E-13 | 8.76E-12 | 20.80 |
| ILMN_1793990 | ID2       | -0.73 | 9.07  | -8.64 | 1.05E-13 | 8.87E-12 | 20.79 |
| ILMN_1794399 | SNRK      | 0.52  | 8.53  | 8.64  | 1.09E-13 | 9.16E-12 | 20.76 |
| ILMN_2308849 | MYADM     | 0.77  | 10.49 | 8.64  | 1.10E-13 | 9.23E-12 | 20.75 |
| ILMN_1682799 | STAMBPL1  | 0.44  | 9.15  | 8.63  | 1.11E-13 | 9.31E-12 | 20.74 |
| ILMN_1793829 | TMCO1     | -0.52 | 11.00 | -8.63 | 1.12E-13 | 9.37E-12 | 20.73 |
| ILMN_1702065 | MFSD5     | -0.36 | 7.86  | -8.63 | 1.13E-13 | 9.43E-12 | 20.72 |
| ILMN_2380163 | PTPRF     | -0.79 | 10.96 | -8.64 | 1.14E-13 | 9.52E-12 | 20.71 |
| ILMN_1704294 | CDH3      | 0.78  | 6.86  | 8.62  | 1.18E-13 | 9.81E-12 | 20.67 |
| ILMN_2075603 | MRGPRF    | 0.38  | 6.73  | 8.63  | 1.18E-13 | 9.81E-12 | 20.68 |
| ILMN_1778337 | HNF1B     | -0.48 | 7.38  | -8.63 | 1.22E-13 | 1.01E-11 | 20.64 |
| ILMN_1699489 | TUBB6     | 0.66  | 7.35  | 8.61  | 1.23E-13 | 1.01E-11 | 20.64 |
| ILMN_1778668 | TAGLN     | 1.22  | 11.25 | 8.61  | 1.25E-13 | 1.03E-11 | 20.62 |
| ILMN_1784884 | LILRB3    | 0.63  | 7.07  | 8.62  | 1.26E-13 | 1.04E-11 | 20.61 |
| ILMN_1728785 | ADGRF5    | 0.62  | 8.18  | 8.61  | 1.27E-13 | 1.04E-11 | 20.60 |
| ILMN_1785646 | PMP22     | 1.02  | 10.12 | 8.60  | 1.31E-13 | 1.07E-11 | 20.58 |
| ILMN_1759948 | RNF5P1    | -0.59 | 8.99  | -8.60 | 1.34E-13 | 1.09E-11 | 20.55 |
| ILMN_1677108 | CAPN13    | -1.34 | 8.65  | -8.59 | 1.40E-13 | 1.14E-11 | 20.51 |
| ILMN_2279961 | LAMP2     | 0.47  | 9.25  | 8.58  | 1.43E-13 | 1.16E-11 | 20.49 |
| ILMN_2234187 | CDO1      | 0.31  | 6.54  | 8.59  | 1.44E-13 | 1.16E-11 | 20.48 |
| ILMN_1798081 | PTPRF     | -0.75 | 9.17  | -8.58 | 1.48E-13 | 1.19E-11 | 20.46 |
| ILMN_1794074 | MXI1      | -0.59 | 7.23  | -8.57 | 1.50E-13 | 1.21E-11 | 20.44 |
| ILMN_1704500 | STAP2     | -0.63 | 7.71  | -8.57 | 1.53E-13 | 1.23E-11 | 20.42 |
| ILMN_1704173 | AIFM3     | -0.51 | 6.96  | -8.57 | 1.55E-13 | 1.24E-11 | 20.41 |

|              |          |       |       |       |          |          |       |
|--------------|----------|-------|-------|-------|----------|----------|-------|
| ILMN_2138589 | MERTK    | 0.64  | 7.73  | 8.56  | 1.56E-13 | 1.25E-11 | 20.40 |
| ILMN_1733453 | RHOQ     | 0.61  | 7.47  | 8.56  | 1.57E-13 | 1.26E-11 | 20.39 |
| ILMN_1796106 | MGAT4B   | -0.57 | 8.25  | -8.56 | 1.63E-13 | 1.30E-11 | 20.36 |
| ILMN_1771376 | PEA15    | 0.62  | 9.09  | 8.55  | 1.72E-13 | 1.37E-11 | 20.31 |
| ILMN_1781700 | IL18R1   | 0.65  | 7.31  | 8.54  | 1.73E-13 | 1.37E-11 | 20.30 |
| ILMN_2186061 | PFKFB3   | 1.19  | 8.99  | 8.54  | 1.76E-13 | 1.39E-11 | 20.28 |
| ILMN_1744293 | CDHR5    | -0.83 | 8.32  | -8.54 | 1.78E-13 | 1.40E-11 | 20.28 |
| ILMN_1682910 | SLC35B3  | -0.36 | 8.28  | -8.53 | 1.88E-13 | 1.48E-11 | 20.22 |
| ILMN_1803180 | PRDX6    | -0.76 | 11.50 | -8.54 | 1.88E-13 | 1.48E-11 | 20.22 |
| ILMN_1728009 | TMEM171  | -0.86 | 8.11  | -8.52 | 1.90E-13 | 1.49E-11 | 20.21 |
| ILMN_1786396 | ZZEF1    | -0.55 | 9.00  | -8.52 | 1.94E-13 | 1.52E-11 | 20.19 |
| ILMN_1767470 | SCPEP1   | 0.57  | 8.23  | 8.52  | 1.98E-13 | 1.54E-11 | 20.17 |
| ILMN_2367113 | CASP6    | -0.55 | 8.06  | -8.52 | 1.98E-13 | 1.54E-11 | 20.17 |
| ILMN_1776993 | COG2     | -0.33 | 8.25  | -8.51 | 2.02E-13 | 1.56E-11 | 20.15 |
| ILMN_1802192 | C10orf99 | -1.75 | 10.19 | -8.53 | 2.01E-13 | 1.56E-11 | 20.16 |
| ILMN_1759023 | WFS1     | 0.48  | 7.95  | 8.51  | 2.04E-13 | 1.58E-11 | 20.14 |
| ILMN_1779735 | LAMTOR4  | -0.73 | 9.80  | -8.50 | 2.10E-13 | 1.62E-11 | 20.11 |
| ILMN_1656560 | PARM1    | -0.75 | 11.16 | -8.50 | 2.13E-13 | 1.64E-11 | 20.10 |
| ILMN_1809291 | TSPAN7   | -0.79 | 8.63  | -8.51 | 2.17E-13 | 1.66E-11 | 20.08 |
| ILMN_1864685 | NA       | 0.42  | 6.94  | 8.50  | 2.17E-13 | 1.66E-11 | 20.08 |
| ILMN_1765557 | OLFML2B  | 0.38  | 6.62  | 8.50  | 2.20E-13 | 1.68E-11 | 20.06 |
| ILMN_1787526 | C2orf88  | -1.18 | 9.38  | -8.51 | 2.22E-13 | 1.69E-11 | 20.06 |
| ILMN_3256325 | CYB561D1 | -0.52 | 8.74  | -8.49 | 2.23E-13 | 1.69E-11 | 20.05 |
| ILMN_1666122 | HEG1     | 0.43  | 7.75  | 8.49  | 2.27E-13 | 1.72E-11 | 20.04 |
| ILMN_1695299 | PDLIM3   | 0.72  | 7.61  | 8.49  | 2.28E-13 | 1.73E-11 | 20.03 |
| ILMN_1693941 | IGSF9    | -0.71 | 7.45  | -8.49 | 2.29E-13 | 1.73E-11 | 20.03 |
| ILMN_1690963 | ASAP1    | 0.59  | 8.42  | 8.48  | 2.34E-13 | 1.76E-11 | 20.01 |
| ILMN_1792508 | TMEM59   | -0.49 | 12.28 | -8.48 | 2.36E-13 | 1.77E-11 | 20.00 |
| ILMN_1746359 | RERG     | 0.49  | 7.10  | 8.47  | 2.45E-13 | 1.84E-11 | 19.96 |
| ILMN_2364971 | PPP2R5C  | 0.57  | 7.98  | 8.47  | 2.49E-13 | 1.87E-11 | 19.94 |
| ILMN_1677239 | CCDC14   | -0.57 | 10.09 | -8.47 | 2.50E-13 | 1.87E-11 | 19.94 |
| ILMN_1654385 | ASB13    | -0.38 | 7.36  | -8.47 | 2.55E-13 | 1.90E-11 | 19.92 |
| ILMN_1798528 | SULT1A2  | -0.75 | 7.49  | -8.47 | 2.55E-13 | 1.90E-11 | 19.92 |
| ILMN_1876924 | WNK1     | 0.34  | 8.62  | 8.46  | 2.61E-13 | 1.94E-11 | 19.90 |
| ILMN_1656482 | OSBPL2   | -0.34 | 8.66  | -8.45 | 2.69E-13 | 1.99E-11 | 19.87 |
| ILMN_1703433 | NA       | 0.58  | 8.86  | 8.45  | 2.81E-13 | 2.08E-11 | 19.83 |
| ILMN_2128770 | CDR2L    | 0.64  | 7.43  | 8.45  | 2.82E-13 | 2.08E-11 | 19.82 |
| ILMN_1664931 | GTF2E2   | 0.45  | 9.59  | 8.44  | 2.86E-13 | 2.10E-11 | 19.81 |
| ILMN_1752968 | LAMB2    | 0.48  | 7.49  | 8.44  | 2.88E-13 | 2.11E-11 | 19.80 |
| ILMN_2197365 | RGS2     | 1.10  | 9.66  | 8.44  | 2.88E-13 | 2.11E-11 | 19.80 |
| ILMN_1812581 | RNF14    | -0.86 | 7.59  | -8.44 | 2.93E-13 | 2.14E-11 | 19.79 |
| ILMN_1795561 | CAMK1D   | -0.46 | 7.28  | -8.44 | 2.95E-13 | 2.15E-11 | 19.78 |
| ILMN_1750312 | SLC51B   | -1.15 | 7.93  | -8.42 | 3.14E-13 | 2.29E-11 | 19.72 |
| ILMN_2230566 | RAB40B   | -0.66 | 8.89  | -8.42 | 3.23E-13 | 2.35E-11 | 19.69 |
| ILMN_1714891 | OR2A14   | -0.51 | 7.11  | -8.42 | 3.25E-13 | 2.36E-11 | 19.68 |
| ILMN_1815057 | PDGFRB   | 0.83  | 8.42  | 8.41  | 3.30E-13 | 2.39E-11 | 19.67 |
| ILMN_2110908 | MYC      | 0.67  | 7.99  | 8.41  | 3.39E-13 | 2.45E-11 | 19.64 |
| ILMN_2136455 | EOGT     | 0.41  | 7.73  | 8.41  | 3.41E-13 | 2.46E-11 | 19.64 |

|              |          |       |       |       |          |          |       |
|--------------|----------|-------|-------|-------|----------|----------|-------|
| ILMN_1789196 | TPM2     | 1.13  | 10.32 | 8.41  | 3.42E-13 | 2.46E-11 | 19.63 |
| ILMN_1671583 | MKRN1    | -0.51 | 11.05 | -8.40 | 3.46E-13 | 2.49E-11 | 19.62 |
| ILMN_1906187 | CAMK1D   | -0.75 | 8.33  | -8.40 | 3.61E-13 | 2.59E-11 | 19.58 |
| ILMN_1679949 | SLC25A23 | -0.78 | 9.65  | -8.39 | 3.67E-13 | 2.63E-11 | 19.56 |
| ILMN_1702487 | SGK1     | 1.12  | 10.61 | 8.39  | 3.70E-13 | 2.64E-11 | 19.56 |
| ILMN_2285802 | SEC14L1  | 0.51  | 7.14  | 8.39  | 3.78E-13 | 2.69E-11 | 19.54 |
| ILMN_2415179 | CLSTN1   | -0.52 | 10.58 | -8.39 | 3.79E-13 | 2.70E-11 | 19.53 |
| ILMN_1700081 | FST      | 0.67  | 6.78  | 8.38  | 3.88E-13 | 2.75E-11 | 19.51 |
| ILMN_1652456 | TMEM98   | -0.57 | 7.58  | -8.39 | 3.93E-13 | 2.78E-11 | 19.50 |
| ILMN_2254962 | ACSS2    | -0.34 | 6.74  | -8.38 | 3.93E-13 | 2.78E-11 | 19.50 |
| ILMN_1706498 | DSE      | 0.56  | 8.09  | 8.38  | 3.95E-13 | 2.78E-11 | 19.49 |
| ILMN_2388263 | HEPACAM2 | -1.15 | 8.84  | -8.37 | 4.10E-13 | 2.88E-11 | 19.46 |
| ILMN_1777906 | MAP7D1   | 0.43  | 9.46  | 8.37  | 4.17E-13 | 2.92E-11 | 19.44 |
| ILMN_2330341 | TCEAL4   | 0.50  | 7.51  | 8.37  | 4.17E-13 | 2.92E-11 | 19.44 |
| ILMN_1773963 | GNA15    | 0.54  | 7.12  | 8.37  | 4.19E-13 | 2.92E-11 | 19.44 |
| ILMN_3240117 | AIDA     | 0.33  | 9.66  | 8.37  | 4.19E-13 | 2.92E-11 | 19.44 |
| ILMN_1794742 | HES5     | -0.51 | 6.99  | -8.36 | 4.25E-13 | 2.96E-11 | 19.42 |
| ILMN_1782419 | GNG11    | 0.61  | 8.42  | 8.36  | 4.28E-13 | 2.98E-11 | 19.41 |
| ILMN_1670672 | TMEM37   | -0.66 | 7.31  | -8.36 | 4.37E-13 | 3.03E-11 | 19.40 |
| ILMN_2368318 | FGR      | 0.81  | 7.48  | 8.35  | 4.45E-13 | 3.08E-11 | 19.38 |
| ILMN_1748840 | CALB2    | 0.57  | 6.88  | 8.35  | 4.48E-13 | 3.09E-11 | 19.37 |
| ILMN_2094061 | IMPA2    | -0.63 | 9.27  | -8.35 | 4.52E-13 | 3.12E-11 | 19.36 |
| ILMN_1757440 | FAM69B   | 0.28  | 6.62  | 8.35  | 4.53E-13 | 3.12E-11 | 19.36 |
| ILMN_1661895 | PI15     | 0.69  | 7.09  | 8.35  | 4.56E-13 | 3.13E-11 | 19.35 |
| ILMN_1706687 | KLHL5    | 0.77  | 8.03  | 8.34  | 4.67E-13 | 3.20E-11 | 19.33 |
| ILMN_1735415 | NUDT16L1 | -0.43 | 7.75  | -8.34 | 4.82E-13 | 3.30E-11 | 19.30 |
| ILMN_1756595 | SH3TC1   | 0.40  | 6.78  | 8.33  | 4.92E-13 | 3.36E-11 | 19.28 |
| ILMN_2169152 | SRGN     | 1.64  | 9.80  | 8.33  | 5.02E-13 | 3.42E-11 | 19.26 |
| ILMN_1657683 | C1orf198 | 0.32  | 7.41  | 8.33  | 5.07E-13 | 3.45E-11 | 19.25 |
| ILMN_1702501 | RPS6KA2  | 0.53  | 7.86  | 8.34  | 5.15E-13 | 3.50E-11 | 19.24 |
| ILMN_1657631 | STAP2    | -0.60 | 7.85  | -8.32 | 5.17E-13 | 3.50E-11 | 19.23 |
| ILMN_1680037 | FAM65A   | 0.49  | 7.80  | 8.32  | 5.18E-13 | 3.50E-11 | 19.23 |
| ILMN_1694240 | MAP2K1   | 0.42  | 8.91  | 8.32  | 5.25E-13 | 3.54E-11 | 19.22 |
| ILMN_1719759 | TNC      | 1.17  | 8.11  | 8.32  | 5.26E-13 | 3.54E-11 | 19.21 |
| ILMN_2331087 | MS4A7    | 0.65  | 7.54  | 8.31  | 5.61E-13 | 3.77E-11 | 19.15 |
| ILMN_1681754 | GGH      | -0.81 | 8.96  | -8.30 | 5.69E-13 | 3.82E-11 | 19.14 |
| ILMN_2340259 | PDE4B    | 0.94  | 7.52  | 8.30  | 5.70E-13 | 3.82E-11 | 19.13 |
| ILMN_1762207 | SGSM1    | -0.48 | 7.20  | -8.30 | 5.75E-13 | 3.84E-11 | 19.13 |
| ILMN_1695157 | CA4      | -2.10 | 10.80 | -8.30 | 5.77E-13 | 3.85E-11 | 19.12 |
| ILMN_2266595 | LILRA5   | 0.60  | 6.97  | 8.31  | 5.85E-13 | 3.90E-11 | 19.11 |
| ILMN_1751576 | TEK      | 0.49  | 7.48  | 8.29  | 6.00E-13 | 3.98E-11 | 19.08 |
| ILMN_1765021 | TOP3B    | -0.31 | 7.47  | -8.29 | 5.99E-13 | 3.98E-11 | 19.09 |
| ILMN_1803813 | ASTE1    | -0.34 | 7.47  | -8.29 | 6.10E-13 | 4.03E-11 | 19.07 |
| ILMN_1804737 | RAVER2   | -0.81 | 9.06  | -8.29 | 6.11E-13 | 4.03E-11 | 19.07 |
| ILMN_1717477 | PSD3     | -0.38 | 7.55  | -8.29 | 6.17E-13 | 4.07E-11 | 19.06 |
| ILMN_1668283 | HYAL2    | 0.38  | 7.18  | 8.30  | 6.28E-13 | 4.13E-11 | 19.04 |
| ILMN_1713462 | AQP8     | -3.11 | 10.71 | -8.28 | 6.52E-13 | 4.28E-11 | 19.00 |
| ILMN_1767816 | APH1B    | 0.46  | 7.08  | 8.28  | 6.53E-13 | 4.28E-11 | 19.00 |

|              |           |       |       |       |          |          |       |
|--------------|-----------|-------|-------|-------|----------|----------|-------|
| ILMN_2100815 | TMEM9B    | -0.42 | 9.59  | -8.27 | 6.58E-13 | 4.31E-11 | 18.99 |
| ILMN_2074477 | GPR4      | 0.25  | 6.47  | 8.27  | 6.65E-13 | 4.34E-11 | 18.98 |
| ILMN_1691076 | TEX11     | -0.55 | 6.99  | -8.27 | 6.74E-13 | 4.39E-11 | 18.97 |
| ILMN_1809099 | IL33      | 0.76  | 7.40  | 8.27  | 6.79E-13 | 4.41E-11 | 18.96 |
| ILMN_1793267 | ETHE1     | -0.53 | 7.57  | -8.28 | 6.83E-13 | 4.43E-11 | 18.96 |
| ILMN_1737089 | CAPN5     | -0.75 | 10.38 | -8.26 | 7.01E-13 | 4.54E-11 | 18.93 |
| ILMN_1801833 | ARHGAP24  | 0.36  | 7.11  | 8.26  | 7.03E-13 | 4.54E-11 | 18.93 |
| ILMN_1674034 | H2AFY     | -0.39 | 8.55  | -8.26 | 7.11E-13 | 4.59E-11 | 18.92 |
| ILMN_2104141 | FGD5      | 0.38  | 7.06  | 8.25  | 7.45E-13 | 4.79E-11 | 18.87 |
| ILMN_2381296 | GSTZ1     | -0.30 | 7.25  | -8.25 | 7.44E-13 | 4.79E-11 | 18.87 |
| ILMN_1802205 | RHOB      | 0.92  | 8.11  | 8.25  | 7.49E-13 | 4.81E-11 | 18.87 |
| ILMN_1686370 | PHYKPL    | -0.32 | 6.99  | -8.25 | 7.55E-13 | 4.83E-11 | 18.86 |
| ILMN_1713505 | NPC1      | 0.52  | 8.09  | 8.25  | 7.56E-13 | 4.83E-11 | 18.86 |
| ILMN_2072568 | CLDN8     | -2.53 | 8.99  | -8.25 | 7.55E-13 | 4.83E-11 | 18.86 |
| ILMN_2384237 | STAP2     | -0.65 | 7.75  | -8.23 | 8.00E-13 | 5.10E-11 | 18.80 |
| ILMN_3191756 | SATB2-AS1 | -0.92 | 7.13  | -8.23 | 8.03E-13 | 5.11E-11 | 18.80 |
| ILMN_1781231 | SLC25A38  | -0.36 | 7.45  | -8.23 | 8.09E-13 | 5.14E-11 | 18.79 |
| ILMN_1760556 | NA        | -0.52 | 9.22  | -8.23 | 8.17E-13 | 5.18E-11 | 18.78 |
| ILMN_3187462 | TMEM253   | -0.72 | 8.07  | -8.23 | 8.18E-13 | 5.18E-11 | 18.78 |
| ILMN_1754894 | C1orf162  | 0.88  | 8.70  | 8.23  | 8.33E-13 | 5.26E-11 | 18.76 |
| ILMN_1669550 | MAD2L2    | 0.51  | 7.74  | 8.22  | 8.40E-13 | 5.28E-11 | 18.76 |
| ILMN_2285817 | FAM89A    | 0.48  | 7.29  | 8.22  | 8.40E-13 | 5.28E-11 | 18.76 |
| ILMN_1777644 | INPP5J    | -0.62 | 7.53  | -8.22 | 8.43E-13 | 5.28E-11 | 18.75 |
| ILMN_2410924 | PLOD2     | -0.73 | 8.09  | -8.22 | 8.42E-13 | 5.28E-11 | 18.75 |
| ILMN_1681777 | SHROOM2   | -0.40 | 6.83  | -8.22 | 8.59E-13 | 5.37E-11 | 18.73 |
| ILMN_1713892 | SMIM14    | -0.48 | 10.99 | -8.22 | 8.68E-13 | 5.42E-11 | 18.72 |
| ILMN_1738552 | SLC1A3    | 0.43  | 6.81  | 8.22  | 8.70E-13 | 5.42E-11 | 18.72 |
| ILMN_2213297 | C11orf54  | -0.51 | 8.83  | -8.23 | 8.75E-13 | 5.45E-11 | 18.72 |
| ILMN_2324002 | CALD1     | 0.79  | 8.07  | 8.22  | 8.77E-13 | 5.45E-11 | 18.71 |
| ILMN_1794951 | SLC39A5   | -1.13 | 8.96  | -8.21 | 8.93E-13 | 5.53E-11 | 18.70 |
| ILMN_1746676 | CLDN8     | -2.27 | 8.82  | -8.21 | 8.96E-13 | 5.54E-11 | 18.69 |
| ILMN_2357730 | CDK20     | -0.41 | 7.39  | -8.22 | 9.13E-13 | 5.64E-11 | 18.68 |
| ILMN_1813604 | NDUFB7    | -0.52 | 9.98  | -8.21 | 9.22E-13 | 5.69E-11 | 18.66 |
| ILMN_1735578 | GUCA2B    | -1.81 | 8.99  | -8.20 | 9.34E-13 | 5.73E-11 | 18.65 |
| ILMN_1811303 | NR5A2     | -0.70 | 8.08  | -8.20 | 9.33E-13 | 5.73E-11 | 18.65 |
| ILMN_2412214 | LGALS9    | -0.43 | 8.07  | -8.20 | 9.34E-13 | 5.73E-11 | 18.65 |
| ILMN_1814856 | CACFD1    | -0.43 | 7.34  | -8.20 | 9.46E-13 | 5.79E-11 | 18.64 |
| ILMN_1701244 | ITFG2     | -0.31 | 8.20  | -8.19 | 9.74E-13 | 5.95E-11 | 18.61 |
| ILMN_2343097 | NCALD     | 0.52  | 7.73  | 8.19  | 9.86E-13 | 6.02E-11 | 18.60 |
| ILMN_1782305 | NR4A2     | 1.50  | 8.00  | 8.19  | 9.96E-13 | 6.06E-11 | 18.59 |
| ILMN_1812968 | SOX18     | 0.70  | 8.21  | 8.18  | 1.05E-12 | 6.36E-11 | 18.54 |
| ILMN_1815154 | MYH10     | 0.55  | 7.90  | 8.18  | 1.05E-12 | 6.36E-11 | 18.54 |
| ILMN_1659913 | ISG20     | 1.03  | 9.87  | 8.18  | 1.06E-12 | 6.40E-11 | 18.53 |
| ILMN_1684086 | BDKRB2    | -0.76 | 7.83  | -8.18 | 1.06E-12 | 6.41E-11 | 18.53 |
| ILMN_1674706 | MTHFD2    | 0.49  | 7.92  | 8.17  | 1.07E-12 | 6.48E-11 | 18.52 |
| ILMN_1745954 | CORO1C    | 0.42  | 7.64  | 8.17  | 1.09E-12 | 6.59E-11 | 18.50 |
| ILMN_3243185 | RERGL     | 0.88  | 7.04  | 8.17  | 1.11E-12 | 6.66E-11 | 18.49 |
| ILMN_1720829 | ZFP36     | 0.96  | 10.66 | 8.17  | 1.12E-12 | 6.74E-11 | 18.47 |

|              |           |       |       |       |          |          |       |
|--------------|-----------|-------|-------|-------|----------|----------|-------|
| ILMN_1744517 | GNS       | 0.32  | 10.85 | 8.17  | 1.12E-12 | 6.74E-11 | 18.47 |
| ILMN_1793476 | PRKCDBP   | 0.62  | 7.96  | 8.16  | 1.16E-12 | 6.93E-11 | 18.44 |
| ILMN_1772731 | HAGH      | -0.37 | 8.78  | -8.16 | 1.18E-12 | 7.04E-11 | 18.42 |
| ILMN_2371280 | CSF3R     | 0.80  | 7.14  | 8.16  | 1.18E-12 | 7.04E-11 | 18.42 |
| ILMN_1667050 | PRPS1     | 0.49  | 7.94  | 8.15  | 1.22E-12 | 7.24E-11 | 18.39 |
| ILMN_1801421 | EMD       | 0.43  | 9.00  | 8.16  | 1.25E-12 | 7.41E-11 | 18.37 |
| ILMN_2329735 | ECM1      | 0.54  | 7.56  | 8.14  | 1.25E-12 | 7.41E-11 | 18.37 |
| ILMN_1788019 | LAMA2     | 0.39  | 6.85  | 8.14  | 1.29E-12 | 7.63E-11 | 18.34 |
| ILMN_2062714 | PTGDR     | -0.78 | 7.43  | -8.14 | 1.29E-12 | 7.66E-11 | 18.33 |
| ILMN_1739496 | PRRX1     | 0.71  | 7.45  | 8.14  | 1.30E-12 | 7.68E-11 | 18.33 |
| ILMN_2062468 | IGFBP7    | 0.90  | 9.99  | 8.13  | 1.32E-12 | 7.78E-11 | 18.31 |
| ILMN_1737988 | PRNP      | 0.64  | 10.33 | 8.13  | 1.33E-12 | 7.78E-11 | 18.31 |
| ILMN_1812995 | CTSL      | 0.91  | 9.60  | 8.13  | 1.32E-12 | 7.78E-11 | 18.31 |
| ILMN_1738652 | BAD       | -0.37 | 7.48  | -8.13 | 1.33E-12 | 7.79E-11 | 18.31 |
| ILMN_1745607 | A2M       | 0.70  | 9.76  | 8.13  | 1.34E-12 | 7.86E-11 | 18.30 |
| ILMN_1668411 | FHL2      | 0.69  | 10.05 | 8.13  | 1.35E-12 | 7.89E-11 | 18.29 |
| ILMN_1768940 | COL15A1   | 0.65  | 7.87  | 8.13  | 1.37E-12 | 8.01E-11 | 18.28 |
| ILMN_1682929 | SYTL2     | -0.72 | 9.51  | -8.12 | 1.38E-12 | 8.05E-11 | 18.27 |
| ILMN_1666546 | DUSP14    | 0.45  | 7.07  | 8.12  | 1.42E-12 | 8.27E-11 | 18.24 |
| ILMN_1699206 | FHDC1     | -0.42 | 7.31  | -8.12 | 1.43E-12 | 8.30E-11 | 18.23 |
| ILMN_1674817 | C1orf115  | -0.79 | 8.92  | -8.12 | 1.43E-12 | 8.31E-11 | 18.23 |
| ILMN_1676895 | BTNL8     | -0.74 | 7.58  | -8.11 | 1.47E-12 | 8.52E-11 | 18.21 |
| ILMN_2104356 | COL1A2    | 1.19  | 9.90  | 8.11  | 1.50E-12 | 8.67E-11 | 18.19 |
| ILMN_1680925 | SLC9A3R1  | -0.74 | 9.74  | -8.11 | 1.51E-12 | 8.69E-11 | 18.18 |
| ILMN_1713952 | C1orf106  | -0.77 | 9.96  | -8.11 | 1.51E-12 | 8.69E-11 | 18.18 |
| ILMN_3235853 | S1PR1     | 0.46  | 6.87  | 8.10  | 1.53E-12 | 8.78E-11 | 18.17 |
| ILMN_1742859 | ACSS2     | -0.34 | 6.84  | -8.10 | 1.56E-12 | 8.94E-11 | 18.15 |
| ILMN_1748751 | C2CD4B    | 0.87  | 7.34  | 8.10  | 1.58E-12 | 9.07E-11 | 18.14 |
| ILMN_1789283 | PPP2R5C   | 0.46  | 7.93  | 8.09  | 1.63E-12 | 9.29E-11 | 18.11 |
| ILMN_2222074 | PTPN12    | 0.43  | 8.39  | 8.08  | 1.68E-12 | 9.59E-11 | 18.08 |
| ILMN_1692962 | CTDSP2    | -0.43 | 9.98  | -8.08 | 1.69E-12 | 9.62E-11 | 18.07 |
| ILMN_1789364 | ZNF789    | -0.45 | 7.84  | -8.07 | 1.77E-12 | 1.01E-10 | 18.02 |
| ILMN_2337941 | COPS8     | 0.40  | 8.46  | 8.07  | 1.81E-12 | 1.03E-10 | 18.00 |
| ILMN_1714438 | MUTYH     | -0.35 | 7.99  | -8.07 | 1.82E-12 | 1.03E-10 | 18.00 |
| ILMN_1789653 | PBLD      | -0.47 | 7.12  | -8.07 | 1.83E-12 | 1.04E-10 | 17.99 |
| ILMN_3235647 | SIK1      | 0.75  | 6.94  | 8.06  | 1.86E-12 | 1.05E-10 | 17.98 |
| ILMN_2352131 | ERBB2     | -0.61 | 9.61  | -8.06 | 1.87E-12 | 1.05E-10 | 17.97 |
| ILMN_1658995 | ACOT9     | 0.49  | 7.58  | 8.06  | 1.88E-12 | 1.06E-10 | 17.97 |
| ILMN_2180885 | CWH43     | -0.89 | 7.49  | -8.06 | 1.88E-12 | 1.06E-10 | 17.97 |
| ILMN_2357542 | VIP       | 0.92  | 7.07  | 8.06  | 1.91E-12 | 1.07E-10 | 17.95 |
| ILMN_3244065 | C9orf69   | -0.43 | 8.39  | -8.05 | 1.97E-12 | 1.10E-10 | 17.92 |
| ILMN_1690040 | TM7SF2    | -0.41 | 7.42  | -8.05 | 2.00E-12 | 1.12E-10 | 17.91 |
| ILMN_1682727 | JAZF1     | 0.46  | 7.33  | 8.05  | 2.02E-12 | 1.13E-10 | 17.90 |
| ILMN_1706021 | TMPRSS4   | -0.41 | 7.20  | -8.05 | 2.03E-12 | 1.13E-10 | 17.89 |
| ILMN_2405521 | MTHFD2    | 0.68  | 8.10  | 8.06  | 2.03E-12 | 1.13E-10 | 17.90 |
| ILMN_2276952 | TSC22D3   | 0.41  | 6.54  | 8.04  | 2.05E-12 | 1.14E-10 | 17.89 |
| ILMN_3249281 | HOXA11-AS | -0.78 | 7.97  | -8.04 | 2.05E-12 | 1.14E-10 | 17.88 |
| ILMN_1740170 | CHCHD10   | -0.56 | 10.56 | -8.04 | 2.07E-12 | 1.14E-10 | 17.87 |

|              |          |       |       |       |          |          |       |
|--------------|----------|-------|-------|-------|----------|----------|-------|
| ILMN_1789505 | ITPR1    | 0.54  | 7.59  | 8.04  | 2.07E-12 | 1.14E-10 | 17.88 |
| ILMN_1807493 | ACVRL1   | -0.34 | 7.48  | -8.04 | 2.08E-12 | 1.15E-10 | 17.87 |
| ILMN_2383229 | A1CF     | -0.80 | 8.56  | -8.04 | 2.10E-12 | 1.16E-10 | 17.86 |
| ILMN_1742390 | FRMD1    | -0.47 | 6.76  | -8.04 | 2.11E-12 | 1.16E-10 | 17.86 |
| ILMN_1720158 | ETS2     | 0.50  | 10.00 | 8.04  | 2.13E-12 | 1.17E-10 | 17.85 |
| ILMN_1702396 | PACSIN2  | -0.38 | 10.18 | -8.04 | 2.14E-12 | 1.17E-10 | 17.84 |
| ILMN_1755974 | ALDOC    | -0.72 | 8.08  | -8.03 | 2.16E-12 | 1.18E-10 | 17.83 |
| ILMN_1796737 | NA       | -0.80 | 8.37  | -8.03 | 2.18E-12 | 1.19E-10 | 17.82 |
| ILMN_1767448 | LHFP     | 0.55  | 8.08  | 8.03  | 2.20E-12 | 1.20E-10 | 17.81 |
| ILMN_1775708 | SLC2A3   | 1.43  | 8.88  | 8.04  | 2.21E-12 | 1.20E-10 | 17.81 |
| ILMN_3216017 | BTNL8    | -0.44 | 6.84  | -8.01 | 2.36E-12 | 1.28E-10 | 17.75 |
| ILMN_1713964 | BTBD3    | -0.53 | 8.39  | -8.01 | 2.38E-12 | 1.29E-10 | 17.74 |
| ILMN_1722294 | CPNE8    | -0.71 | 8.17  | -8.01 | 2.38E-12 | 1.29E-10 | 17.74 |
| ILMN_1813561 | SCIN     | -0.83 | 8.16  | -8.01 | 2.40E-12 | 1.30E-10 | 17.73 |
| ILMN_1807095 | MRPS36   | -0.31 | 7.38  | -8.01 | 2.46E-12 | 1.33E-10 | 17.71 |
| ILMN_2373779 | COPS8    | 0.27  | 6.97  | 8.01  | 2.46E-12 | 1.33E-10 | 17.70 |
| ILMN_1672503 | DPYSL2   | 0.55  | 10.54 | 8.00  | 2.52E-12 | 1.36E-10 | 17.68 |
| ILMN_1770610 | MERTK    | 0.30  | 7.02  | 8.00  | 2.57E-12 | 1.39E-10 | 17.66 |
| ILMN_1849186 | ZNF704   | -0.59 | 7.90  | -8.00 | 2.58E-12 | 1.39E-10 | 17.66 |
| ILMN_1803429 | CD44     | 0.76  | 10.92 | 7.99  | 2.61E-12 | 1.40E-10 | 17.65 |
| ILMN_1705522 | SPAG1    | -0.35 | 6.65  | -7.99 | 2.66E-12 | 1.43E-10 | 17.63 |
| ILMN_1753613 | HOXA5    | -0.94 | 9.09  | -7.99 | 2.66E-12 | 1.43E-10 | 17.63 |
| ILMN_1700652 | CHAD     | -0.28 | 6.57  | -7.99 | 2.68E-12 | 1.43E-10 | 17.62 |
| ILMN_1656501 | DUSP5    | 1.09  | 8.83  | 7.99  | 2.73E-12 | 1.45E-10 | 17.60 |
| ILMN_1778843 | TMEM253  | -0.57 | 7.40  | -7.98 | 2.74E-12 | 1.46E-10 | 17.60 |
| ILMN_1810420 | DYSF     | 0.45  | 7.03  | 7.98  | 2.74E-12 | 1.46E-10 | 17.60 |
| ILMN_3245564 | ARHGAP44 | -1.02 | 9.29  | -7.98 | 2.75E-12 | 1.46E-10 | 17.60 |
| ILMN_1687303 | ACAD10   | -0.38 | 7.40  | -7.98 | 2.76E-12 | 1.46E-10 | 17.59 |
| ILMN_1712673 | SASH1    | 0.58  | 7.90  | 7.99  | 2.80E-12 | 1.48E-10 | 17.58 |
| ILMN_2129234 | TMEM47   | 0.67  | 7.87  | 7.98  | 2.82E-12 | 1.49E-10 | 17.57 |
| ILMN_1687824 | SEPHS2   | -0.52 | 8.78  | -7.98 | 2.83E-12 | 1.50E-10 | 17.57 |
| ILMN_2175317 | CYP4X1   | 0.46  | 6.90  | 7.98  | 2.85E-12 | 1.50E-10 | 17.56 |
| ILMN_3245413 | DENND5A  | 0.44  | 7.23  | 7.98  | 2.85E-12 | 1.50E-10 | 17.56 |
| ILMN_1790098 | OGN      | 0.63  | 7.18  | 7.97  | 2.90E-12 | 1.52E-10 | 17.55 |
| ILMN_1743836 | MXRA7    | 0.55  | 7.54  | 7.97  | 2.93E-12 | 1.54E-10 | 17.53 |
| ILMN_1800642 | RELN     | 0.34  | 6.74  | 7.97  | 2.95E-12 | 1.54E-10 | 17.53 |
| ILMN_2105919 | FGF2     | 0.54  | 6.97  | 7.97  | 2.95E-12 | 1.54E-10 | 17.53 |
| ILMN_1727479 | TPRG1L   | -0.52 | 9.93  | -7.97 | 2.99E-12 | 1.56E-10 | 17.51 |
| ILMN_1723123 | FGFR3    | -1.12 | 8.94  | -7.96 | 3.03E-12 | 1.58E-10 | 17.50 |
| ILMN_1795158 | FGR      | 0.60  | 7.27  | 7.96  | 3.05E-12 | 1.59E-10 | 17.50 |
| ILMN_2379920 | NXPE4    | -1.17 | 8.95  | -7.96 | 3.09E-12 | 1.61E-10 | 17.48 |
| ILMN_1655117 | WDR19    | 0.35  | 7.49  | 7.97  | 3.10E-12 | 1.61E-10 | 17.48 |
| ILMN_1665331 | AMT      | -0.48 | 8.25  | -7.96 | 3.10E-12 | 1.61E-10 | 17.48 |
| ILMN_1657495 | MLEC     | -0.48 | 10.72 | -7.96 | 3.16E-12 | 1.63E-10 | 17.46 |
| ILMN_1710075 | FAM89A   | 0.51  | 7.50  | 7.95  | 3.21E-12 | 1.65E-10 | 17.44 |
| ILMN_1723706 | GRAMD4   | -0.56 | 8.53  | -7.95 | 3.21E-12 | 1.65E-10 | 17.44 |
| ILMN_2107991 | HABP4    | 0.34  | 6.77  | 7.95  | 3.20E-12 | 1.65E-10 | 17.45 |
| ILMN_3305938 | SGK1     | 1.10  | 10.07 | 7.95  | 3.20E-12 | 1.65E-10 | 17.45 |

|              |          |       |       |       |          |          |       |
|--------------|----------|-------|-------|-------|----------|----------|-------|
| ILMN_2402817 | ZBTB16   | 0.62  | 6.76  | 7.95  | 3.28E-12 | 1.69E-10 | 17.42 |
| ILMN_1744725 | BTBD6    | -0.29 | 9.26  | -7.95 | 3.31E-12 | 1.70E-10 | 17.41 |
| ILMN_1866337 | NA       | -0.33 | 7.02  | -7.94 | 3.35E-12 | 1.71E-10 | 17.40 |
| ILMN_2319952 | VDR      | -0.50 | 7.51  | -7.94 | 3.34E-12 | 1.71E-10 | 17.41 |
| ILMN_2183409 | SCARB1   | -0.41 | 7.59  | -7.94 | 3.44E-12 | 1.76E-10 | 17.38 |
| ILMN_2367883 | GEM      | 1.03  | 7.29  | 7.94  | 3.44E-12 | 1.76E-10 | 17.38 |
| ILMN_1738657 | SATB2    | -1.06 | 9.74  | -7.93 | 3.54E-12 | 1.80E-10 | 17.35 |
| ILMN_1676893 | ADCY3    | 0.50  | 9.17  | 7.93  | 3.56E-12 | 1.81E-10 | 17.34 |
| ILMN_1764764 | MUM1     | -0.44 | 8.24  | -7.93 | 3.57E-12 | 1.82E-10 | 17.34 |
| ILMN_1652722 | C14orf2  | -0.37 | 8.46  | -7.93 | 3.64E-12 | 1.85E-10 | 17.32 |
| ILMN_1720461 | SLC17A4  | -0.80 | 7.53  | -7.92 | 3.67E-12 | 1.86E-10 | 17.31 |
| ILMN_1663866 | TGFBI    | 0.98  | 10.48 | 7.92  | 3.72E-12 | 1.88E-10 | 17.30 |
| ILMN_1670452 | NA       | -0.52 | 7.07  | -7.93 | 3.72E-12 | 1.88E-10 | 17.30 |
| ILMN_2124361 | LEAP2    | -0.59 | 7.38  | -7.92 | 3.76E-12 | 1.90E-10 | 17.29 |
| ILMN_1694759 | SMIM7    | -0.31 | 8.31  | -7.92 | 3.83E-12 | 1.92E-10 | 17.27 |
| ILMN_1703205 | EDN3     | -0.83 | 7.89  | -7.92 | 3.84E-12 | 1.92E-10 | 17.27 |
| ILMN_1798706 | GPR183   | 1.11  | 8.14  | 7.92  | 3.83E-12 | 1.92E-10 | 17.27 |
| ILMN_1666894 | CSPG4    | 0.42  | 6.90  | 7.91  | 3.87E-12 | 1.94E-10 | 17.26 |
| ILMN_1748844 | CNKSR3   | -0.56 | 8.43  | -7.91 | 3.91E-12 | 1.95E-10 | 17.25 |
| ILMN_1700896 | SAP30    | 0.44  | 7.28  | 7.91  | 3.97E-12 | 1.99E-10 | 17.24 |
| ILMN_1770800 | PODN     | 0.60  | 7.29  | 7.90  | 4.10E-12 | 2.04E-10 | 17.21 |
| ILMN_1811330 | FAM134B  | -0.57 | 7.97  | -7.90 | 4.20E-12 | 2.09E-10 | 17.18 |
| ILMN_3258356 | RPSAP52  | -0.37 | 7.33  | -7.90 | 4.22E-12 | 2.10E-10 | 17.18 |
| ILMN_1768004 | PDCD4    | -0.64 | 8.26  | -7.89 | 4.27E-12 | 2.12E-10 | 17.17 |
| ILMN_1779071 | FEZ1     | 0.43  | 7.42  | 7.89  | 4.30E-12 | 2.13E-10 | 17.16 |
| ILMN_1779228 | CDH2     | 0.34  | 6.89  | 7.89  | 4.38E-12 | 2.17E-10 | 17.14 |
| ILMN_1785252 | SLC26A6  | -0.62 | 9.42  | -7.89 | 4.46E-12 | 2.20E-10 | 17.12 |
| ILMN_1704369 | LIMA1    | -0.49 | 10.15 | -7.88 | 4.51E-12 | 2.23E-10 | 17.11 |
| ILMN_1811593 | NIPAL1   | -0.57 | 7.37  | -7.88 | 4.66E-12 | 2.30E-10 | 17.08 |
| ILMN_2121408 | HBEGF    | 1.22  | 8.34  | 7.87  | 4.72E-12 | 2.33E-10 | 17.07 |
| ILMN_1705750 | TGM2     | 0.70  | 8.33  | 7.87  | 4.86E-12 | 2.39E-10 | 17.04 |
| ILMN_1738921 | ACAA1    | -0.65 | 8.79  | -7.87 | 4.88E-12 | 2.40E-10 | 17.03 |
| ILMN_1671058 | CDX2     | -1.17 | 9.31  | -7.87 | 4.89E-12 | 2.40E-10 | 17.03 |
| ILMN_2124471 | SLC36A1  | -0.63 | 7.65  | -7.86 | 4.97E-12 | 2.44E-10 | 17.02 |
| ILMN_1743104 | RBM4B    | -0.27 | 7.95  | -7.86 | 5.01E-12 | 2.45E-10 | 17.01 |
| ILMN_1777190 | CFD      | 1.24  | 10.35 | 7.86  | 5.05E-12 | 2.46E-10 | 17.00 |
| ILMN_2320888 | CXCR4    | 0.89  | 7.32  | 7.86  | 5.16E-12 | 2.51E-10 | 16.98 |
| ILMN_1676891 | CDK19    | -0.40 | 8.50  | -7.85 | 5.18E-12 | 2.52E-10 | 16.98 |
| ILMN_2056087 | IGF1     | 0.39  | 6.70  | 7.85  | 5.25E-12 | 2.55E-10 | 16.96 |
| ILMN_1683175 | RPP25L   | -0.38 | 8.32  | -7.85 | 5.30E-12 | 2.57E-10 | 16.95 |
| ILMN_2367010 | ADGRG6   | 0.61  | 7.33  | 7.85  | 5.33E-12 | 2.58E-10 | 16.95 |
| ILMN_3235709 | HNF1B    | -0.50 | 7.51  | -7.85 | 5.35E-12 | 2.59E-10 | 16.95 |
| ILMN_1806710 | ESPN     | -0.50 | 7.05  | -7.85 | 5.36E-12 | 2.59E-10 | 16.94 |
| ILMN_1708337 | NOXO1    | -0.56 | 7.46  | -7.84 | 5.47E-12 | 2.64E-10 | 16.92 |
| ILMN_1655225 | C19orf25 | -0.27 | 7.03  | -7.84 | 5.58E-12 | 2.69E-10 | 16.90 |
| ILMN_1811050 | CCDC88A  | 0.25  | 6.67  | 7.84  | 5.59E-12 | 2.69E-10 | 16.90 |
| ILMN_2312709 | LCMT1    | -0.44 | 9.40  | -7.84 | 5.58E-12 | 2.69E-10 | 16.90 |
| ILMN_2364521 | AXL      | 0.64  | 7.97  | 7.84  | 5.61E-12 | 2.69E-10 | 16.90 |

|              |          |       |       |       |          |          |       |
|--------------|----------|-------|-------|-------|----------|----------|-------|
| ILMN_1733341 | FAM227A  | -0.44 | 6.71  | -7.84 | 5.64E-12 | 2.71E-10 | 16.89 |
| ILMN_1653718 | ZFAND2B  | -0.39 | 8.52  | -7.83 | 5.84E-12 | 2.79E-10 | 16.86 |
| ILMN_2049303 | ECI1     | -0.44 | 8.06  | -7.83 | 5.89E-12 | 2.81E-10 | 16.85 |
| ILMN_1692464 | TTC38    | -0.60 | 8.96  | -7.82 | 6.07E-12 | 2.90E-10 | 16.82 |
| ILMN_1810584 | IL1R1    | 0.65  | 7.22  | 7.82  | 6.25E-12 | 2.97E-10 | 16.79 |
| ILMN_2125374 | CMAS     | -0.51 | 9.73  | -7.83 | 6.24E-12 | 2.97E-10 | 16.80 |
| ILMN_1735877 | EFEMP1   | 0.70  | 8.03  | 7.81  | 6.33E-12 | 3.01E-10 | 16.78 |
| ILMN_1794056 | DNAJB5   | 0.36  | 6.79  | 7.81  | 6.40E-12 | 3.04E-10 | 16.77 |
| ILMN_1870111 | NA       | 0.39  | 6.94  | 7.81  | 6.55E-12 | 3.11E-10 | 16.75 |
| ILMN_1733110 | RASSF7   | -0.63 | 10.08 | -7.80 | 6.66E-12 | 3.16E-10 | 16.73 |
| ILMN_3243705 | PDXDC1   | -0.36 | 10.61 | -7.80 | 6.67E-12 | 3.16E-10 | 16.73 |
| ILMN_2092118 | FPR1     | 0.65  | 6.85  | 7.80  | 6.76E-12 | 3.19E-10 | 16.72 |
| ILMN_2207419 | INTS6L   | -0.29 | 6.98  | -7.80 | 6.80E-12 | 3.21E-10 | 16.71 |
| ILMN_3260715 | CRTC3    | 0.40  | 8.40  | 7.80  | 6.81E-12 | 3.21E-10 | 16.71 |
| ILMN_1655796 | 3-Mar    | -0.42 | 8.72  | -7.80 | 6.90E-12 | 3.25E-10 | 16.70 |
| ILMN_1710644 | MARVELD3 | -0.67 | 8.84  | -7.79 | 7.01E-12 | 3.29E-10 | 16.68 |
| ILMN_1780236 | PMM1     | -0.61 | 8.78  | -7.79 | 7.06E-12 | 3.31E-10 | 16.67 |
| ILMN_1806349 | SLC6A8   | -0.61 | 7.43  | -7.79 | 7.14E-12 | 3.35E-10 | 16.66 |
| ILMN_1651557 | KDELC2   | 0.42  | 8.25  | 7.79  | 7.27E-12 | 3.40E-10 | 16.65 |
| ILMN_3246962 | SPECC1L  | -0.41 | 7.55  | -7.79 | 7.27E-12 | 3.40E-10 | 16.65 |
| ILMN_1711888 | COBL     | -0.63 | 9.08  | -7.78 | 7.32E-12 | 3.41E-10 | 16.64 |
| ILMN_1796336 | MAP1S    | 0.23  | 7.37  | 7.78  | 7.31E-12 | 3.41E-10 | 16.64 |
| ILMN_1780058 | DEGS1    | 0.51  | 9.17  | 7.78  | 7.37E-12 | 3.43E-10 | 16.63 |
| ILMN_1740523 | KTN1     | -0.58 | 7.65  | -7.78 | 7.44E-12 | 3.46E-10 | 16.62 |
| ILMN_1783337 | DECR2    | -0.57 | 8.05  | -7.78 | 7.48E-12 | 3.46E-10 | 16.62 |
| ILMN_1799139 | PLOD2    | -0.27 | 6.87  | -7.78 | 7.46E-12 | 3.46E-10 | 16.62 |
| ILMN_2374036 | CTSL     | 0.84  | 9.89  | 7.80  | 7.47E-12 | 3.46E-10 | 16.63 |
| ILMN_2243308 | ACVR1B   | -0.65 | 9.26  | -7.77 | 7.92E-12 | 3.66E-10 | 16.56 |
| ILMN_2413615 | LLGL2    | -0.43 | 7.03  | -7.76 | 8.05E-12 | 3.72E-10 | 16.55 |
| ILMN_2352563 | CLDND1   | 0.41  | 9.21  | 7.76  | 8.14E-12 | 3.75E-10 | 16.54 |
| ILMN_1763540 | PSME4    | 0.45  | 9.06  | 7.76  | 8.18E-12 | 3.76E-10 | 16.53 |
| ILMN_1655595 | SERPINE2 | 0.98  | 9.57  | 7.76  | 8.23E-12 | 3.78E-10 | 16.52 |
| ILMN_2199439 | CA2      | -1.05 | 11.53 | -7.76 | 8.23E-12 | 3.78E-10 | 16.52 |
| ILMN_1699357 | SLC22A5  | -0.82 | 8.11  | -7.76 | 8.27E-12 | 3.79E-10 | 16.52 |
| ILMN_1717793 | C19orf33 | -0.76 | 9.69  | -7.76 | 8.27E-12 | 3.79E-10 | 16.52 |
| ILMN_1687301 | VCAN     | 0.70  | 8.12  | 7.76  | 8.28E-12 | 3.79E-10 | 16.52 |
| ILMN_2148847 | AKIRIN2  | 0.43  | 8.51  | 7.76  | 8.31E-12 | 3.80E-10 | 16.51 |
| ILMN_1810054 | CNN1     | 0.96  | 7.41  | 7.76  | 8.35E-12 | 3.81E-10 | 16.51 |
| ILMN_1684836 | AKAP12   | 0.56  | 7.17  | 7.76  | 8.41E-12 | 3.83E-10 | 16.50 |
| ILMN_1687978 | PHLDA1   | 1.48  | 8.03  | 7.75  | 8.52E-12 | 3.87E-10 | 16.49 |
| ILMN_1736806 | PAG1     | -0.48 | 7.61  | -7.75 | 8.62E-12 | 3.92E-10 | 16.48 |
| ILMN_2375992 | SPINT1   | -0.54 | 7.91  | -7.75 | 8.66E-12 | 3.93E-10 | 16.47 |
| ILMN_1691290 | CELSR3   | 0.50  | 7.07  | 7.75  | 8.69E-12 | 3.94E-10 | 16.47 |
| ILMN_1680874 | TUBB2B   | 0.66  | 7.41  | 7.74  | 8.87E-12 | 4.01E-10 | 16.45 |
| ILMN_1726928 | TCEA3    | -0.75 | 10.56 | -7.74 | 8.87E-12 | 4.01E-10 | 16.45 |
| ILMN_1667295 | VASN     | 0.67  | 7.53  | 7.74  | 8.90E-12 | 4.01E-10 | 16.45 |
| ILMN_1790529 | LUM      | 1.29  | 10.66 | 7.74  | 8.91E-12 | 4.01E-10 | 16.45 |
| ILMN_1741148 | ALDOA    | -0.37 | 10.45 | -7.74 | 8.94E-12 | 4.03E-10 | 16.44 |



|              |          |       |       |       |          |          |       |
|--------------|----------|-------|-------|-------|----------|----------|-------|
| ILMN_2065022 | ARHGAP44 | -0.94 | 8.84  | -7.74 | 8.95E-12 | 4.03E-10 | 16.44 |
| ILMN_1690982 | DDT      | -0.46 | 10.73 | -7.74 | 9.12E-12 | 4.09E-10 | 16.42 |
| ILMN_1779875 | THY1     | 0.84  | 7.75  | 7.74  | 9.13E-12 | 4.09E-10 | 16.42 |
| ILMN_1671703 | ACTA2    | 0.88  | 11.99 | 7.74  | 9.25E-12 | 4.14E-10 | 16.41 |
| ILMN_2366714 | UQCR10   | -0.36 | 7.84  | -7.73 | 9.33E-12 | 4.17E-10 | 16.40 |
| ILMN_1663519 | SLC24A3  | 0.36  | 7.41  | 7.73  | 9.38E-12 | 4.19E-10 | 16.40 |
| ILMN_1734897 | SLC4A4   | -1.12 | 9.89  | -7.73 | 9.64E-12 | 4.30E-10 | 16.37 |
| ILMN_1669362 | IGFBP6   | 0.82  | 7.62  | 7.73  | 9.72E-12 | 4.33E-10 | 16.36 |
| ILMN_1802397 | GNA11    | -0.66 | 9.23  | -7.72 | 9.84E-12 | 4.38E-10 | 16.35 |
| ILMN_1669788 | NUDT14   | -0.42 | 8.19  | -7.72 | 9.90E-12 | 4.40E-10 | 16.34 |
| ILMN_1658847 | NRARP    | -0.88 | 9.93  | -7.72 | 9.94E-12 | 4.41E-10 | 16.34 |
| ILMN_1654324 | HEYL     | 0.47  | 7.14  | 7.72  | 1.00E-11 | 4.45E-10 | 16.33 |
| ILMN_2400372 | SULT1A2  | -0.74 | 8.70  | -7.72 | 1.02E-11 | 4.51E-10 | 16.31 |
| ILMN_1663716 | CDHR1    | -0.92 | 7.52  | -7.71 | 1.03E-11 | 4.57E-10 | 16.30 |
| ILMN_2289849 | FCGR2A   | 0.59  | 7.07  | 7.71  | 1.05E-11 | 4.65E-10 | 16.28 |
| ILMN_1793888 | SERPINB5 | 1.85  | 8.45  | 7.71  | 1.06E-11 | 4.66E-10 | 16.28 |
| ILMN_1775762 | GNAI2    | 0.56  | 8.68  | 7.71  | 1.06E-11 | 4.66E-10 | 16.28 |
| ILMN_1761560 | PHF13    | 0.36  | 8.29  | 7.71  | 1.07E-11 | 4.72E-10 | 16.27 |
| ILMN_1791280 | HSPB8    | 0.51  | 6.88  | 7.70  | 1.09E-11 | 4.78E-10 | 16.25 |
| ILMN_1706764 | GOLPH3L  | -0.43 | 8.60  | -7.70 | 1.10E-11 | 4.83E-10 | 16.24 |
| ILMN_1767113 | AOX1     | 0.44  | 6.57  | 7.71  | 1.11E-11 | 4.86E-10 | 16.24 |
| ILMN_1740571 | OCLN     | -0.46 | 7.83  | -7.70 | 1.11E-11 | 4.86E-10 | 16.23 |
| ILMN_2400935 | TAGLN    | 1.13  | 8.67  | 7.70  | 1.12E-11 | 4.91E-10 | 16.22 |
| ILMN_1757387 | UCHL1    | 0.37  | 6.74  | 7.69  | 1.13E-11 | 4.94E-10 | 16.21 |
| ILMN_1703330 | FEM1C    | 0.34  | 9.04  | 7.69  | 1.13E-11 | 4.94E-10 | 16.21 |
| ILMN_3180557 | CYB561D1 | -0.36 | 7.37  | -7.69 | 1.16E-11 | 5.04E-10 | 16.19 |
| ILMN_1692938 | PSAT1    | 0.64  | 7.23  | 7.69  | 1.17E-11 | 5.08E-10 | 16.18 |
| ILMN_2367215 | PRCP     | 0.40  | 8.36  | 7.68  | 1.21E-11 | 5.25E-10 | 16.15 |
| ILMN_2402392 | COL8A1   | 0.42  | 6.82  | 7.68  | 1.22E-11 | 5.30E-10 | 16.14 |
| ILMN_1748281 | MAPK10   | 0.33  | 7.12  | 7.68  | 1.23E-11 | 5.33E-10 | 16.13 |
| ILMN_1881081 | NA       | -0.33 | 7.07  | -7.68 | 1.23E-11 | 5.33E-10 | 16.13 |
| ILMN_2329914 | SPRY1    | 0.73  | 9.46  | 7.67  | 1.25E-11 | 5.39E-10 | 16.12 |
| ILMN_1800540 | CD55     | 1.35  | 7.95  | 7.70  | 1.26E-11 | 5.44E-10 | 16.12 |
| ILMN_2140059 | LAMA4    | 0.44  | 7.60  | 7.67  | 1.27E-11 | 5.47E-10 | 16.10 |
| ILMN_1770963 | NAALADL1 | -0.64 | 7.36  | -7.68 | 1.29E-11 | 5.56E-10 | 16.09 |
| ILMN_2387952 | FAM134B  | -0.62 | 9.08  | -7.66 | 1.31E-11 | 5.62E-10 | 16.07 |
| ILMN_1769158 | ISOC2    | -0.29 | 7.77  | -7.66 | 1.32E-11 | 5.67E-10 | 16.06 |
| ILMN_1809931 | NDRG1    | -0.60 | 10.53 | -7.66 | 1.32E-11 | 5.67E-10 | 16.06 |
| ILMN_1803889 | CCDC64B  | -0.47 | 7.47  | -7.65 | 1.37E-11 | 5.89E-10 | 16.02 |
| ILMN_1733937 | MMD      | 0.55  | 8.74  | 7.65  | 1.39E-11 | 5.93E-10 | 16.01 |
| ILMN_2304404 | PBLD     | -0.36 | 6.76  | -7.65 | 1.39E-11 | 5.93E-10 | 16.01 |
| ILMN_1680973 | FOXF1    | 0.40  | 7.31  | 7.64  | 1.44E-11 | 6.15E-10 | 15.98 |
| ILMN_2371055 | EFNA1    | -0.83 | 9.64  | -7.64 | 1.45E-11 | 6.18E-10 | 15.97 |
| ILMN_1733443 | SULT1B1  | -0.45 | 7.53  | -7.64 | 1.46E-11 | 6.20E-10 | 15.97 |
| ILMN_2123521 | SYCP3    | -0.28 | 6.82  | -7.64 | 1.46E-11 | 6.20E-10 | 15.97 |
| ILMN_1713037 | PFKL     | -0.46 | 7.95  | -7.64 | 1.48E-11 | 6.27E-10 | 15.95 |
| ILMN_1812070 | ABCB1    | -1.22 | 8.65  | -7.64 | 1.49E-11 | 6.33E-10 | 15.94 |
| ILMN_1703284 | SPIRE2   | -0.63 | 8.01  | -7.64 | 1.51E-11 | 6.36E-10 | 15.93 |

|              |           |       |       |       |          |          |       |
|--------------|-----------|-------|-------|-------|----------|----------|-------|
| ILMN_1715612 | OTOP2     | -0.65 | 6.80  | -7.64 | 1.50E-11 | 6.36E-10 | 15.93 |
| ILMN_1750674 | SDSL      | -0.41 | 7.74  | -7.64 | 1.51E-11 | 6.36E-10 | 15.93 |
| ILMN_1811997 | RNF115    | 0.35  | 8.36  | 7.65  | 1.50E-11 | 6.36E-10 | 15.94 |
| ILMN_2216157 | GNA12     | 0.34  | 7.48  | 7.63  | 1.51E-11 | 6.38E-10 | 15.93 |
| ILMN_1720771 | STX11     | 0.51  | 6.75  | 7.63  | 1.52E-11 | 6.40E-10 | 15.92 |
| ILMN_2389151 | UGP2      | -0.55 | 10.99 | -7.63 | 1.54E-11 | 6.49E-10 | 15.91 |
| ILMN_1655429 | TNFAIP1   | 0.40  | 8.32  | 7.63  | 1.55E-11 | 6.52E-10 | 15.90 |
| ILMN_1677363 | TMEM253   | -0.52 | 7.59  | -7.62 | 1.59E-11 | 6.66E-10 | 15.88 |
| ILMN_2366654 | NR5A2     | -0.62 | 7.92  | -7.62 | 1.59E-11 | 6.66E-10 | 15.88 |
| ILMN_1805192 | ITPRIP    | 0.68  | 7.70  | 7.62  | 1.61E-11 | 6.74E-10 | 15.87 |
| ILMN_1750689 | MPP5      | -0.43 | 8.13  | -7.63 | 1.61E-11 | 6.74E-10 | 15.87 |
| ILMN_1802053 | ZNF91     | -0.54 | 8.39  | -7.62 | 1.63E-11 | 6.80E-10 | 15.86 |
| ILMN_1729905 | GAL3ST1   | -0.32 | 6.72  | -7.62 | 1.66E-11 | 6.93E-10 | 15.84 |
| ILMN_1672264 | NA        | -0.56 | 7.43  | -7.63 | 1.67E-11 | 6.94E-10 | 15.84 |
| ILMN_2347789 | C4BPB     | 0.67  | 7.01  | 7.61  | 1.67E-11 | 6.96E-10 | 15.83 |
| ILMN_1795298 | GPER1     | -0.76 | 7.44  | -7.61 | 1.71E-11 | 7.10E-10 | 15.81 |
| ILMN_3223826 | SPNS2     | 0.39  | 6.91  | 7.61  | 1.71E-11 | 7.11E-10 | 15.81 |
| ILMN_1700257 | C4orf32   | 0.34  | 7.23  | 7.60  | 1.76E-11 | 7.29E-10 | 15.78 |
| ILMN_1785265 | PLS3      | 0.51  | 7.69  | 7.60  | 1.76E-11 | 7.29E-10 | 15.78 |
| ILMN_2336186 | LCMT1     | -0.42 | 8.40  | -7.60 | 1.77E-11 | 7.31E-10 | 15.78 |
| ILMN_1805999 | MYO1D     | -0.74 | 9.39  | -7.60 | 1.78E-11 | 7.34E-10 | 15.77 |
| ILMN_1656822 | DNM2      | -0.46 | 8.36  | -7.60 | 1.79E-11 | 7.36E-10 | 15.77 |
| ILMN_1808258 | HTR4      | -0.47 | 6.89  | -7.60 | 1.79E-11 | 7.36E-10 | 15.77 |
| ILMN_1720433 | FAM3D     | -0.95 | 10.70 | -7.60 | 1.79E-11 | 7.37E-10 | 15.76 |
| ILMN_1740010 | PCNX1     | 0.51  | 8.07  | 7.60  | 1.80E-11 | 7.39E-10 | 15.76 |
| ILMN_1663399 | TIMP4     | 0.39  | 6.82  | 7.60  | 1.82E-11 | 7.49E-10 | 15.75 |
| ILMN_1703531 | S1PR3     | 0.50  | 6.89  | 7.59  | 1.86E-11 | 7.64E-10 | 15.73 |
| ILMN_1778964 | CLIC5     | -0.80 | 8.59  | -7.59 | 1.87E-11 | 7.65E-10 | 15.72 |
| ILMN_1670926 | CHST15    | 0.78  | 8.34  | 7.59  | 1.88E-11 | 7.70E-10 | 15.72 |
| ILMN_1745497 | METTL25   | -0.31 | 7.63  | -7.58 | 1.94E-11 | 7.94E-10 | 15.68 |
| ILMN_1699354 | EPHA2     | 0.49  | 7.12  | 7.58  | 1.96E-11 | 7.98E-10 | 15.68 |
| ILMN_1761911 | GORAB     | -0.35 | 7.91  | -7.58 | 1.97E-11 | 8.02E-10 | 15.67 |
| ILMN_1680618 | MYC       | 0.69  | 8.92  | 7.58  | 1.99E-11 | 8.09E-10 | 15.66 |
| ILMN_1808777 | EHD2      | 0.33  | 7.01  | 7.58  | 1.99E-11 | 8.09E-10 | 15.66 |
| ILMN_2215824 | NA        | -0.78 | 8.36  | -7.58 | 2.00E-11 | 8.12E-10 | 15.66 |
| ILMN_1784553 | SDC2      | 0.36  | 7.18  | 7.58  | 2.02E-11 | 8.21E-10 | 15.65 |
| ILMN_1653429 | SLC35A3   | -0.50 | 10.09 | -7.57 | 2.03E-11 | 8.21E-10 | 15.64 |
| ILMN_1754529 | SPG7      | -0.46 | 9.59  | -7.57 | 2.04E-11 | 8.25E-10 | 15.64 |
| ILMN_2339955 | NR4A2     | 1.22  | 7.37  | 7.57  | 2.05E-11 | 8.30E-10 | 15.63 |
| ILMN_1811468 | IRX3      | 0.60  | 6.82  | 7.57  | 2.06E-11 | 8.30E-10 | 15.63 |
| ILMN_2387105 | OGN       | 0.64  | 7.19  | 7.57  | 2.10E-11 | 8.47E-10 | 15.61 |
| ILMN_1676005 | KPNA1     | 0.31  | 7.96  | 7.56  | 2.17E-11 | 8.74E-10 | 15.58 |
| ILMN_1712613 | PNLIPRP2  | -0.65 | 6.80  | -7.56 | 2.19E-11 | 8.80E-10 | 15.57 |
| ILMN_1699265 | TNFRSF10B | 0.43  | 8.62  | 7.56  | 2.22E-11 | 8.93E-10 | 15.55 |
| ILMN_1790549 | TSPAN3    | -0.57 | 11.52 | -7.56 | 2.22E-11 | 8.93E-10 | 15.55 |
| ILMN_1723684 | ACKR1     | 0.82  | 8.25  | 7.56  | 2.23E-11 | 8.93E-10 | 15.55 |
| ILMN_1711986 | MAP1LC3A  | -0.33 | 6.93  | -7.55 | 2.26E-11 | 9.05E-10 | 15.54 |
| ILMN_1783120 | SLMAP     | 0.44  | 9.71  | 7.55  | 2.27E-11 | 9.07E-10 | 15.53 |

|              |           |       |       |       |          |          |       |
|--------------|-----------|-------|-------|-------|----------|----------|-------|
| ILMN_1724350 | TRIM36    | -0.51 | 7.21  | -7.55 | 2.27E-11 | 9.08E-10 | 15.53 |
| ILMN_1651799 | SLC38A2   | 0.55  | 9.14  | 7.55  | 2.33E-11 | 9.28E-10 | 15.51 |
| ILMN_1685703 | ACOX2     | -0.58 | 8.00  | -7.55 | 2.33E-11 | 9.28E-10 | 15.51 |
| ILMN_2282641 | TBXAS1    | 0.53  | 7.84  | 7.55  | 2.33E-11 | 9.28E-10 | 15.51 |
| ILMN_1683148 | PRICKLE2  | 0.50  | 7.91  | 7.54  | 2.34E-11 | 9.31E-10 | 15.50 |
| ILMN_1697440 | PRPF4     | 0.27  | 8.40  | 7.54  | 2.34E-11 | 9.31E-10 | 15.50 |
| ILMN_1763129 | DCTPP1    | -0.41 | 9.18  | -7.54 | 2.37E-11 | 9.40E-10 | 15.49 |
| ILMN_1763749 | GUCA2A    | -1.92 | 11.37 | -7.54 | 2.40E-11 | 9.49E-10 | 15.48 |
| ILMN_1689004 | TNFRSF12A | 0.79  | 7.10  | 7.54  | 2.41E-11 | 9.53E-10 | 15.47 |
| ILMN_1795118 | SIDT1     | -0.41 | 7.39  | -7.55 | 2.41E-11 | 9.53E-10 | 15.48 |
| ILMN_2068435 | ZNF700    | -0.35 | 8.76  | -7.54 | 2.41E-11 | 9.53E-10 | 15.48 |
| ILMN_1838863 | CCDC85C   | -0.51 | 8.52  | -7.54 | 2.43E-11 | 9.58E-10 | 15.47 |
| ILMN_1786353 | CNGA1     | -0.46 | 6.76  | -7.54 | 2.44E-11 | 9.62E-10 | 15.46 |
| ILMN_1743933 | TSHZ3     | 0.40  | 7.30  | 7.53  | 2.50E-11 | 9.83E-10 | 15.44 |
| ILMN_1669273 | PPT1      | 0.59  | 9.84  | 7.53  | 2.51E-11 | 9.85E-10 | 15.44 |
| ILMN_2191822 | ALG14     | -0.30 | 7.02  | -7.53 | 2.54E-11 | 9.98E-10 | 15.42 |
| ILMN_1666932 | FCGR2A    | 0.88  | 7.89  | 7.53  | 2.58E-11 | 1.01E-09 | 15.41 |
| ILMN_1676088 | MSRB3     | 0.71  | 7.73  | 7.52  | 2.59E-11 | 1.01E-09 | 15.41 |
| ILMN_1814074 | PHKA2     | -0.35 | 7.90  | -7.52 | 2.59E-11 | 1.01E-09 | 15.40 |
| ILMN_2384152 | EPS8L3    | -0.61 | 8.23  | -7.52 | 2.62E-11 | 1.02E-09 | 15.39 |
| ILMN_1661695 | IRAK3     | 0.44  | 7.02  | 7.52  | 2.68E-11 | 1.04E-09 | 15.37 |
| ILMN_1757604 | TPM2      | 1.09  | 9.68  | 7.52  | 2.68E-11 | 1.04E-09 | 15.37 |
| ILMN_1654322 | ATP1B3    | -0.65 | 8.68  | -7.52 | 2.68E-11 | 1.05E-09 | 15.37 |
| ILMN_1792660 | CAMSAP2   | 0.43  | 7.59  | 7.52  | 2.70E-11 | 1.05E-09 | 15.36 |
| ILMN_1701204 | VEGFC     | 0.32  | 6.82  | 7.51  | 2.72E-11 | 1.06E-09 | 15.36 |
| ILMN_1726893 | EPN3      | -0.38 | 6.99  | -7.51 | 2.72E-11 | 1.06E-09 | 15.36 |
| ILMN_1712628 | GTF2IRD1  | 0.25  | 6.83  | 7.51  | 2.75E-11 | 1.07E-09 | 15.35 |
| ILMN_1655469 | TSPAN3    | -0.72 | 10.69 | -7.51 | 2.77E-11 | 1.07E-09 | 15.34 |
| ILMN_1774930 | CDC14A    | -0.37 | 7.38  | -7.51 | 2.77E-11 | 1.07E-09 | 15.34 |
| ILMN_1655611 | TSHZ2     | 0.39  | 7.00  | 7.52  | 2.78E-11 | 1.07E-09 | 15.34 |
| ILMN_1727740 | SYNCRIP   | 0.43  | 8.65  | 7.51  | 2.82E-11 | 1.09E-09 | 15.32 |
| ILMN_3240520 | ADGRL4    | 0.34  | 6.93  | 7.51  | 2.83E-11 | 1.09E-09 | 15.32 |
| ILMN_2082209 | TOX2      | 0.66  | 8.81  | 7.51  | 2.83E-11 | 1.09E-09 | 15.32 |
| ILMN_1658800 | BRPF3     | -0.44 | 9.35  | -7.50 | 2.88E-11 | 1.11E-09 | 15.30 |
| ILMN_2230892 | IL10RB    | -0.41 | 10.52 | -7.50 | 2.89E-11 | 1.11E-09 | 15.30 |
| ILMN_3300663 | NA        | -0.36 | 10.66 | -7.50 | 2.94E-11 | 1.13E-09 | 15.28 |
| ILMN_1851063 | NA        | -0.24 | 6.84  | -7.50 | 2.95E-11 | 1.13E-09 | 15.28 |
| ILMN_1815673 | DKK3      | 0.69  | 9.01  | 7.49  | 3.00E-11 | 1.15E-09 | 15.26 |
| ILMN_1812262 | DDR1      | -0.45 | 9.00  | -7.49 | 3.03E-11 | 1.16E-09 | 15.25 |
| ILMN_1785900 | CXADR     | -0.50 | 7.88  | -7.49 | 3.04E-11 | 1.16E-09 | 15.25 |
| ILMN_2361768 | CHRNA1    | -0.32 | 6.55  | -7.49 | 3.05E-11 | 1.17E-09 | 15.24 |
| ILMN_1662795 | CA2       | -0.96 | 12.39 | -7.49 | 3.06E-11 | 1.17E-09 | 15.24 |
| ILMN_1666471 | UQCRQ     | -0.35 | 11.98 | -7.49 | 3.07E-11 | 1.17E-09 | 15.24 |
| ILMN_2388142 | CD99L2    | 0.35  | 8.78  | 7.49  | 3.07E-11 | 1.17E-09 | 15.24 |
| ILMN_1704537 | PHGDH     | 0.67  | 8.07  | 7.49  | 3.07E-11 | 1.17E-09 | 15.24 |
| ILMN_2202637 | CRY1      | 0.50  | 7.46  | 7.50  | 3.08E-11 | 1.17E-09 | 15.24 |
| ILMN_1796177 | GIPC1     | -0.63 | 10.52 | -7.48 | 3.22E-11 | 1.22E-09 | 15.19 |
| ILMN_2086095 | ID2       | -0.57 | 9.20  | -7.48 | 3.28E-11 | 1.24E-09 | 15.17 |

|              |          |       |       |       |          |          |       |
|--------------|----------|-------|-------|-------|----------|----------|-------|
| ILMN_1732609 | FAM214B  | 0.45  | 7.65  | 7.47  | 3.29E-11 | 1.24E-09 | 15.17 |
| ILMN_3251550 | PHLDA1   | 0.55  | 6.92  | 7.47  | 3.29E-11 | 1.25E-09 | 15.17 |
| ILMN_1771233 | CHMP4B   | -0.39 | 9.26  | -7.47 | 3.32E-11 | 1.25E-09 | 15.16 |
| ILMN_1700967 | MB21D2   | 0.41  | 7.35  | 7.47  | 3.36E-11 | 1.27E-09 | 15.15 |
| ILMN_1809537 | MASP1    | 0.55  | 6.73  | 7.47  | 3.37E-11 | 1.27E-09 | 15.15 |
| ILMN_1786444 | LPL      | 0.51  | 6.88  | 7.46  | 3.49E-11 | 1.31E-09 | 15.11 |
| ILMN_3229324 | SGK1     | 1.10  | 9.89  | 7.46  | 3.52E-11 | 1.32E-09 | 15.11 |
| ILMN_1733756 | COL12A1  | 0.55  | 7.21  | 7.46  | 3.57E-11 | 1.34E-09 | 15.09 |
| ILMN_1681437 | DCXR     | -0.36 | 8.25  | -7.46 | 3.58E-11 | 1.34E-09 | 15.09 |
| ILMN_1674032 | ABCD3    | -0.41 | 8.05  | -7.46 | 3.61E-11 | 1.35E-09 | 15.08 |
| ILMN_1740759 | MAMDC4   | -0.38 | 6.83  | -7.44 | 3.86E-11 | 1.44E-09 | 15.02 |
| ILMN_1765355 | NOX1     | -0.44 | 7.21  | -7.44 | 3.85E-11 | 1.44E-09 | 15.02 |
| ILMN_1708143 | FAM127A  | 0.39  | 8.30  | 7.43  | 4.01E-11 | 1.50E-09 | 14.98 |
| ILMN_1801216 | S100P    | 1.11  | 11.46 | 7.43  | 4.05E-11 | 1.51E-09 | 14.97 |
| ILMN_1751097 | CREB3L2  | 0.58  | 9.52  | 7.43  | 4.11E-11 | 1.53E-09 | 14.95 |
| ILMN_2064898 | COA3     | -0.48 | 10.50 | -7.43 | 4.16E-11 | 1.55E-09 | 14.94 |
| ILMN_1736911 | TMOD1    | 0.47  | 6.80  | 7.43  | 4.18E-11 | 1.55E-09 | 14.94 |
| ILMN_1664464 | PTGDS    | 1.29  | 8.44  | 7.42  | 4.23E-11 | 1.57E-09 | 14.92 |
| ILMN_1677534 | SCAP     | -0.31 | 9.51  | -7.42 | 4.27E-11 | 1.58E-09 | 14.92 |
| ILMN_2064150 | PRRG2    | -0.56 | 8.47  | -7.42 | 4.27E-11 | 1.58E-09 | 14.92 |
| ILMN_1682600 | NA       | -0.35 | 6.64  | -7.42 | 4.28E-11 | 1.58E-09 | 14.91 |
| ILMN_2139970 | ALDH1A3  | 0.72  | 8.06  | 7.42  | 4.28E-11 | 1.58E-09 | 14.91 |
| ILMN_1760778 | ENG      | 0.43  | 7.42  | 7.42  | 4.35E-11 | 1.61E-09 | 14.90 |
| ILMN_1750321 | TRANK1   | -0.41 | 7.88  | -7.42 | 4.36E-11 | 1.61E-09 | 14.90 |
| ILMN_2174369 | ELOVL5   | 0.70  | 7.45  | 7.42  | 4.36E-11 | 1.61E-09 | 14.90 |
| ILMN_2048607 | ANKRD9   | -0.61 | 9.80  | -7.41 | 4.41E-11 | 1.62E-09 | 14.89 |
| ILMN_1808202 | R3HDM4   | 0.40  | 9.10  | 7.41  | 4.45E-11 | 1.64E-09 | 14.88 |
| ILMN_1779448 | EFHD1    | 0.51  | 7.13  | 7.41  | 4.50E-11 | 1.66E-09 | 14.86 |
| ILMN_1710326 | CLDND1   | 0.39  | 9.10  | 7.41  | 4.54E-11 | 1.67E-09 | 14.86 |
| ILMN_1787648 | NA       | -0.65 | 8.25  | -7.41 | 4.54E-11 | 1.67E-09 | 14.86 |
| ILMN_1657111 | AHNAK2   | 0.59  | 7.37  | 7.41  | 4.56E-11 | 1.67E-09 | 14.85 |
| ILMN_1713496 | ST3GALS5 | 0.44  | 7.39  | 7.41  | 4.56E-11 | 1.67E-09 | 14.85 |
| ILMN_1656373 | BNC2     | 0.30  | 6.87  | 7.41  | 4.60E-11 | 1.68E-09 | 14.84 |
| ILMN_1683328 | IP6K2    | -0.33 | 7.23  | -7.40 | 4.68E-11 | 1.71E-09 | 14.83 |
| ILMN_1750062 | PPARGC1A | -0.83 | 8.10  | -7.40 | 4.73E-11 | 1.73E-09 | 14.82 |
| ILMN_1652777 | CDC42EP2 | 0.31  | 6.84  | 7.40  | 4.76E-11 | 1.73E-09 | 14.81 |
| ILMN_1718771 | CCDC24   | -0.52 | 7.76  | -7.40 | 4.76E-11 | 1.73E-09 | 14.81 |
| ILMN_1753426 | KIAA0556 | -0.31 | 8.24  | -7.40 | 4.78E-11 | 1.74E-09 | 14.81 |
| ILMN_2169761 | CPNE8    | -0.69 | 8.27  | -7.40 | 4.80E-11 | 1.74E-09 | 14.80 |
| ILMN_1673529 | PHYKPL   | -0.34 | 7.82  | -7.40 | 4.83E-11 | 1.75E-09 | 14.80 |
| ILMN_1704861 | MYO1A    | -0.80 | 9.36  | -7.39 | 4.85E-11 | 1.76E-09 | 14.79 |
| ILMN_1761275 | FUT6     | -0.38 | 7.26  | -7.39 | 4.86E-11 | 1.76E-09 | 14.79 |
| ILMN_1670134 | FADS1    | 0.38  | 6.78  | 7.39  | 4.90E-11 | 1.77E-09 | 14.78 |
| ILMN_1720623 | SYTL3    | 0.41  | 6.89  | 7.39  | 4.90E-11 | 1.77E-09 | 14.78 |
| ILMN_1795442 | LAMA4    | 0.45  | 7.86  | 7.39  | 4.94E-11 | 1.78E-09 | 14.77 |
| ILMN_1652065 | KCNMB1   | 0.74  | 7.61  | 7.39  | 4.99E-11 | 1.80E-09 | 14.76 |
| ILMN_1696119 | SRI      | -0.38 | 6.89  | -7.39 | 4.99E-11 | 1.80E-09 | 14.76 |
| ILMN_1769282 | FRMD6    | 0.53  | 7.64  | 7.39  | 5.01E-11 | 1.80E-09 | 14.76 |

|              |          |       |       |       |          |          |       |
|--------------|----------|-------|-------|-------|----------|----------|-------|
| ILMN_1752927 | FAM160B1 | 0.33  | 8.55  | 7.40  | 5.06E-11 | 1.82E-09 | 14.76 |
| ILMN_1753547 | STAT5A   | 0.46  | 8.04  | 7.39  | 5.07E-11 | 1.82E-09 | 14.75 |
| ILMN_1713178 | DENND6A  | 0.34  | 7.85  | 7.38  | 5.09E-11 | 1.83E-09 | 14.74 |
| ILMN_1666633 | NA       | -0.29 | 7.05  | -7.38 | 5.13E-11 | 1.84E-09 | 14.74 |
| ILMN_1816925 | NA       | -0.64 | 7.56  | -7.38 | 5.13E-11 | 1.84E-09 | 14.74 |
| ILMN_1748303 | NA       | 1.69  | 7.67  | 7.38  | 5.14E-11 | 1.84E-09 | 14.74 |
| ILMN_1652207 | COX4I1   | -0.34 | 12.56 | -7.38 | 5.15E-11 | 1.84E-09 | 14.73 |
| ILMN_1767365 | PAK1     | -0.37 | 8.33  | -7.38 | 5.14E-11 | 1.84E-09 | 14.73 |
| ILMN_2352090 | GPRC5C   | -0.47 | 8.43  | -7.38 | 5.16E-11 | 1.84E-09 | 14.73 |
| ILMN_1659766 | BAG3     | 0.64  | 8.60  | 7.38  | 5.21E-11 | 1.86E-09 | 14.72 |
| ILMN_1886092 | FAM189A1 | -0.56 | 7.42  | -7.38 | 5.26E-11 | 1.87E-09 | 14.71 |
| ILMN_1661137 | SH3RF2   | -0.50 | 8.22  | -7.38 | 5.30E-11 | 1.88E-09 | 14.71 |
| ILMN_1691860 | SPRY1    | 0.67  | 8.44  | 7.37  | 5.40E-11 | 1.92E-09 | 14.69 |
| ILMN_1707312 | NFIL3    | 0.74  | 7.86  | 7.38  | 5.47E-11 | 1.94E-09 | 14.68 |
| ILMN_2120273 | AP1S2    | 0.63  | 8.50  | 7.38  | 5.50E-11 | 1.95E-09 | 14.67 |
| ILMN_1797744 | TPPP3    | 0.39  | 6.72  | 7.37  | 5.62E-11 | 1.99E-09 | 14.65 |
| ILMN_2339266 | LAMA2    | 0.32  | 6.86  | 7.36  | 5.65E-11 | 2.00E-09 | 14.64 |
| ILMN_1758049 | NFIA     | 0.37  | 7.95  | 7.36  | 5.76E-11 | 2.04E-09 | 14.62 |
| ILMN_1800659 | PGM1     | -0.57 | 10.24 | -7.36 | 5.79E-11 | 2.04E-09 | 14.62 |
| ILMN_1669023 | FHL5     | 0.35  | 6.49  | 7.36  | 5.84E-11 | 2.06E-09 | 14.61 |
| ILMN_2320349 | BACE1    | 0.24  | 6.76  | 7.35  | 5.99E-11 | 2.11E-09 | 14.59 |
| ILMN_2132599 | ANKRD22  | 0.59  | 8.47  | 7.35  | 6.02E-11 | 2.12E-09 | 14.58 |
| ILMN_1677877 | UBE2L3   | -0.37 | 7.92  | -7.35 | 6.11E-11 | 2.15E-09 | 14.57 |
| ILMN_1741389 | B3GNT8   | -0.40 | 7.18  | -7.35 | 6.14E-11 | 2.16E-09 | 14.56 |
| ILMN_2233366 | ASAP1    | 0.38  | 7.23  | 7.34  | 6.29E-11 | 2.21E-09 | 14.54 |
| ILMN_2370882 | ACSL5    | -0.62 | 9.20  | -7.34 | 6.43E-11 | 2.25E-09 | 14.52 |
| ILMN_1689456 | ZBTB20   | 0.31  | 7.71  | 7.33  | 6.48E-11 | 2.27E-09 | 14.51 |
| ILMN_2332553 | MSRB3    | 0.49  | 7.12  | 7.33  | 6.56E-11 | 2.29E-09 | 14.50 |
| ILMN_1755850 | ZNF350   | -0.21 | 6.77  | -7.33 | 6.65E-11 | 2.32E-09 | 14.48 |
| ILMN_1667453 | HINFP    | -0.31 | 7.35  | -7.33 | 6.70E-11 | 2.34E-09 | 14.48 |
| ILMN_2363450 | NOXO1    | -0.45 | 7.33  | -7.33 | 6.70E-11 | 2.34E-09 | 14.48 |
| ILMN_1735220 | CAV2     | 0.49  | 7.21  | 7.33  | 6.72E-11 | 2.34E-09 | 14.47 |
| ILMN_1806310 | A1CF     | -0.78 | 9.11  | -7.33 | 6.74E-11 | 2.34E-09 | 14.47 |
| ILMN_1690802 | TRMT112  | 0.51  | 9.74  | 7.33  | 6.78E-11 | 2.36E-09 | 14.46 |
| ILMN_1691717 | RHBDF2   | 0.60  | 8.16  | 7.32  | 6.79E-11 | 2.36E-09 | 14.46 |
| ILMN_1652431 | CA1      | -1.74 | 11.93 | -7.32 | 6.89E-11 | 2.39E-09 | 14.45 |
| ILMN_1696031 | HMG2P46  | -0.24 | 6.60  | -7.32 | 6.90E-11 | 2.39E-09 | 14.45 |
| ILMN_1776363 | ANK2     | 0.32  | 6.77  | 7.32  | 6.91E-11 | 2.39E-09 | 14.45 |
| ILMN_3238269 | NDUFA6   | -0.41 | 8.65  | -7.32 | 7.00E-11 | 2.42E-09 | 14.43 |
| ILMN_2358540 | RBMS1    | 0.57  | 7.37  | 7.32  | 7.11E-11 | 2.46E-09 | 14.42 |
| ILMN_1717052 | STARD10  | -0.89 | 9.99  | -7.31 | 7.12E-11 | 2.46E-09 | 14.42 |
| ILMN_1764596 | MPST     | -0.62 | 8.27  | -7.31 | 7.18E-11 | 2.48E-09 | 14.41 |
| ILMN_1699644 | 3-Mar    | -0.43 | 8.59  | -7.31 | 7.27E-11 | 2.50E-09 | 14.40 |
| ILMN_1656900 | NA       | -0.78 | 9.47  | -7.31 | 7.38E-11 | 2.54E-09 | 14.38 |
| ILMN_1805410 | C15orf48 | -0.87 | 12.29 | -7.31 | 7.47E-11 | 2.57E-09 | 14.37 |
| ILMN_1726466 | HDHD3    | -0.52 | 8.67  | -7.30 | 7.48E-11 | 2.57E-09 | 14.37 |
| ILMN_1809695 | CAMK2G   | -0.41 | 8.18  | -7.30 | 7.48E-11 | 2.57E-09 | 14.37 |
| ILMN_1682015 | GAL      | 0.27  | 6.44  | 7.30  | 7.50E-11 | 2.57E-09 | 14.37 |

|              |            |       |       |       |          |          |       |
|--------------|------------|-------|-------|-------|----------|----------|-------|
| ILMN_2234956 | LEPR       | 0.37  | 7.18  | 7.30  | 7.54E-11 | 2.58E-09 | 14.36 |
| ILMN_1795499 | MAML3      | -0.23 | 6.70  | -7.30 | 7.57E-11 | 2.59E-09 | 14.36 |
| ILMN_1783636 | COX6A1     | -0.39 | 10.35 | -7.30 | 7.63E-11 | 2.61E-09 | 14.35 |
| ILMN_1901304 | NA         | -0.27 | 6.99  | -7.30 | 7.64E-11 | 2.61E-09 | 14.35 |
| ILMN_2316878 | PTPRO      | -0.71 | 7.39  | -7.29 | 7.86E-11 | 2.68E-09 | 14.32 |
| ILMN_2313901 | PAM        | 0.56  | 10.50 | 7.29  | 7.90E-11 | 2.69E-09 | 14.32 |
| ILMN_1742901 | NA         | -0.34 | 6.84  | -7.30 | 7.97E-11 | 2.71E-09 | 14.31 |
| ILMN_1662949 | FAM132A    | -0.40 | 6.95  | -7.29 | 7.98E-11 | 2.71E-09 | 14.31 |
| ILMN_2165354 | DCLK1      | 0.36  | 7.03  | 7.29  | 8.07E-11 | 2.74E-09 | 14.30 |
| ILMN_2184373 | CXCL8      | 1.92  | 8.14  | 7.29  | 8.13E-11 | 2.76E-09 | 14.29 |
| ILMN_1795838 | C4orf19    | -0.47 | 7.87  | -7.29 | 8.14E-11 | 2.76E-09 | 14.29 |
| ILMN_2216838 | DKFZP586I1 | -0.29 | 7.72  | -7.29 | 8.16E-11 | 2.77E-09 | 14.28 |
| ILMN_1740441 | CYB5R3     | 0.32  | 7.97  | 7.29  | 8.18E-11 | 2.77E-09 | 14.28 |
| ILMN_1747223 | FRYL       | -0.57 | 9.36  | -7.29 | 8.21E-11 | 2.78E-09 | 14.28 |
| ILMN_1714861 | CD68       | 0.59  | 10.28 | 7.28  | 8.29E-11 | 2.80E-09 | 14.27 |
| ILMN_1788213 | FRAT2      | -0.43 | 8.94  | -7.28 | 8.36E-11 | 2.82E-09 | 14.26 |
| ILMN_1726030 | GPX7       | 0.50  | 7.17  | 7.28  | 8.42E-11 | 2.84E-09 | 14.25 |
| ILMN_2107184 | SNRK       | 0.45  | 9.39  | 7.28  | 8.58E-11 | 2.89E-09 | 14.23 |
| ILMN_1690464 | SLC35G1    | -0.77 | 7.71  | -7.27 | 8.75E-11 | 2.94E-09 | 14.22 |
| ILMN_1812902 | CYYR1      | 0.36  | 7.21  | 7.27  | 8.82E-11 | 2.96E-09 | 14.21 |
| ILMN_1673896 | MAP3K13    | -0.21 | 6.77  | -7.27 | 8.98E-11 | 3.02E-09 | 14.19 |
| ILMN_1789793 | NUAK2      | -0.34 | 6.87  | -7.26 | 9.06E-11 | 3.04E-09 | 14.18 |
| ILMN_1657547 | CCDC34     | -0.67 | 8.33  | -7.26 | 9.08E-11 | 3.04E-09 | 14.18 |
| ILMN_1669172 | PTPRR      | -0.27 | 6.78  | -7.26 | 9.08E-11 | 3.04E-09 | 14.18 |
| ILMN_1807529 | PADI4      | 0.36  | 6.65  | 7.26  | 9.28E-11 | 3.10E-09 | 14.16 |
| ILMN_1810628 | PRUNE2     | 0.69  | 8.43  | 7.26  | 9.30E-11 | 3.11E-09 | 14.16 |
| ILMN_1704753 | EPAS1      | 0.35  | 9.88  | 7.25  | 9.54E-11 | 3.18E-09 | 14.13 |
| ILMN_1791226 | NXN        | 0.28  | 6.85  | 7.25  | 9.62E-11 | 3.21E-09 | 14.12 |
| ILMN_1674985 | TMEM51     | -0.25 | 9.40  | -7.25 | 9.66E-11 | 3.22E-09 | 14.12 |
| ILMN_1787919 | PARVB      | 0.38  | 7.11  | 7.26  | 9.73E-11 | 3.24E-09 | 14.12 |
| ILMN_3239181 | ITPRIP     | 0.60  | 7.59  | 7.25  | 9.73E-11 | 3.24E-09 | 14.11 |
| ILMN_2232177 | ACTN1      | 0.52  | 9.11  | 7.25  | 9.78E-11 | 3.25E-09 | 14.11 |
| ILMN_1783131 | SAMD13     | -0.37 | 7.08  | -7.25 | 9.82E-11 | 3.26E-09 | 14.10 |
| ILMN_1720373 | SLC7A5     | 0.80  | 7.35  | 7.25  | 9.84E-11 | 3.26E-09 | 14.10 |
| ILMN_1716925 | FSIP1      | -0.31 | 6.84  | -7.24 | 9.99E-11 | 3.30E-09 | 14.09 |
| ILMN_1784320 | ELMO1      | 0.48  | 7.34  | 7.24  | 9.99E-11 | 3.30E-09 | 14.09 |
| ILMN_1717909 | ANO1       | 0.54  | 7.31  | 7.25  | 1.00E-10 | 3.32E-09 | 14.09 |
| ILMN_1795181 | DDX60      | -0.66 | 8.29  | -7.24 | 1.00E-10 | 3.32E-09 | 14.08 |
| ILMN_2141482 | SERPINF1   | 0.46  | 7.16  | 7.24  | 1.01E-10 | 3.34E-09 | 14.08 |
| ILMN_3307688 | NXPE2      | -0.35 | 6.94  | -7.24 | 1.02E-10 | 3.35E-09 | 14.07 |
| ILMN_1730523 | FAM195A    | -0.54 | 7.94  | -7.23 | 1.06E-10 | 3.48E-09 | 14.03 |
| ILMN_1699887 | ST14       | -0.58 | 8.96  | -7.23 | 1.07E-10 | 3.54E-09 | 14.02 |
| ILMN_1674759 | LPCAT4     | -0.28 | 7.35  | -7.23 | 1.08E-10 | 3.55E-09 | 14.01 |
| ILMN_1732398 | SCGB2A1    | -1.00 | 8.43  | -7.23 | 1.09E-10 | 3.58E-09 | 14.00 |
| ILMN_3251629 | NA         | 0.50  | 9.52  | 7.23  | 1.10E-10 | 3.59E-09 | 14.00 |
| ILMN_1815392 | ACTRT1     | -0.39 | 7.45  | -7.22 | 1.10E-10 | 3.62E-09 | 13.99 |
| ILMN_2167805 | LUM        | 0.53  | 6.94  | 7.22  | 1.12E-10 | 3.66E-09 | 13.98 |
| ILMN_1685978 | ATPIF1     | -0.35 | 7.75  | -7.22 | 1.13E-10 | 3.70E-09 | 13.97 |

|              |           |       |       |       |          |          |       |
|--------------|-----------|-------|-------|-------|----------|----------|-------|
| ILMN_2380418 | BICD2     | 0.39  | 7.65  | 7.21  | 1.16E-10 | 3.78E-09 | 13.94 |
| ILMN_1676213 | SRPX2     | 0.30  | 6.70  | 7.21  | 1.17E-10 | 3.80E-09 | 13.94 |
| ILMN_1673352 | IFITM2    | 0.81  | 10.92 | 7.21  | 1.17E-10 | 3.81E-09 | 13.93 |
| ILMN_2089073 | ATP9A     | -0.47 | 10.68 | -7.21 | 1.18E-10 | 3.83E-09 | 13.93 |
| ILMN_1759117 | XK        | -0.58 | 8.51  | -7.21 | 1.18E-10 | 3.83E-09 | 13.93 |
| ILMN_2294784 | PRDM1     | 0.26  | 6.68  | 7.21  | 1.18E-10 | 3.83E-09 | 13.92 |
| ILMN_2358886 | EDN3      | -0.89 | 8.18  | -7.21 | 1.18E-10 | 3.83E-09 | 13.92 |
| ILMN_3185709 | IP6K2     | -0.36 | 7.28  | -7.21 | 1.18E-10 | 3.83E-09 | 13.93 |
| ILMN_1785413 | ATP2C2    | -0.62 | 8.41  | -7.22 | 1.19E-10 | 3.87E-09 | 13.92 |
| ILMN_1764522 | LMBR1     | 0.27  | 7.90  | 7.21  | 1.20E-10 | 3.90E-09 | 13.90 |
| ILMN_1709237 | EPHX2     | -0.83 | 9.03  | -7.20 | 1.21E-10 | 3.91E-09 | 13.90 |
| ILMN_1773307 | NAP1L5    | 0.28  | 6.88  | 7.20  | 1.21E-10 | 3.91E-09 | 13.90 |
| ILMN_1689445 | POLR2H    | -0.34 | 10.71 | -7.20 | 1.22E-10 | 3.93E-09 | 13.90 |
| ILMN_2336133 | NA        | -0.72 | 9.39  | -7.20 | 1.22E-10 | 3.94E-09 | 13.89 |
| ILMN_1706056 | ENTPD8    | -0.48 | 7.17  | -7.20 | 1.23E-10 | 3.97E-09 | 13.88 |
| ILMN_2138765 | PLIN2     | 0.69  | 9.04  | 7.21  | 1.25E-10 | 4.02E-09 | 13.87 |
| ILMN_1775501 | IL1B      | 1.16  | 7.47  | 7.20  | 1.25E-10 | 4.02E-09 | 13.87 |
| ILMN_1652825 | IL10RA    | 0.63  | 7.31  | 7.20  | 1.25E-10 | 4.02E-09 | 13.87 |
| ILMN_2100000 | DHX36     | 0.28  | 7.39  | 7.20  | 1.26E-10 | 4.05E-09 | 13.86 |
| ILMN_1710619 | LINC00483 | -0.44 | 7.31  | -7.19 | 1.27E-10 | 4.08E-09 | 13.85 |
| ILMN_1668345 | OAF       | -0.59 | 9.68  | -7.19 | 1.27E-10 | 4.08E-09 | 13.85 |
| ILMN_1731287 | ARFGAP3   | 0.62  | 8.81  | 7.19  | 1.27E-10 | 4.08E-09 | 13.85 |
| ILMN_2394561 | IRF2BP2   | -0.45 | 9.27  | -7.19 | 1.28E-10 | 4.11E-09 | 13.84 |
| ILMN_1764082 | MBOAT1    | -0.45 | 8.41  | -7.19 | 1.29E-10 | 4.13E-09 | 13.83 |
| ILMN_1801766 | CCDC109B  | 0.63  | 8.63  | 7.19  | 1.29E-10 | 4.13E-09 | 13.83 |
| ILMN_2108823 | FZD7      | -0.26 | 7.37  | -7.19 | 1.29E-10 | 4.13E-09 | 13.83 |
| ILMN_1714082 | CMAS      | -0.52 | 9.80  | -7.19 | 1.30E-10 | 4.15E-09 | 13.83 |
| ILMN_1801584 | CXCR4     | 1.05  | 7.89  | 7.19  | 1.31E-10 | 4.16E-09 | 13.83 |
| ILMN_1674265 | AVIL      | -0.30 | 6.83  | -7.18 | 1.35E-10 | 4.30E-09 | 13.79 |
| ILMN_2206722 | FER1L4    | 0.77  | 7.41  | 7.17  | 1.42E-10 | 4.51E-09 | 13.75 |
| ILMN_1843932 | SAP30L    | -0.35 | 7.86  | -7.17 | 1.42E-10 | 4.52E-09 | 13.74 |
| ILMN_1812031 | PALM      | 0.35  | 7.19  | 7.17  | 1.44E-10 | 4.56E-09 | 13.73 |
| ILMN_2120210 | RCAN2     | 0.59  | 8.52  | 7.16  | 1.47E-10 | 4.65E-09 | 13.71 |
| ILMN_1706960 | KIAA1217  | -0.39 | 7.70  | -7.16 | 1.47E-10 | 4.66E-09 | 13.71 |
| ILMN_1692072 | CENPBD1   | -0.23 | 7.76  | -7.16 | 1.47E-10 | 4.67E-09 | 13.71 |
| ILMN_1755350 | PIWIL2    | -0.23 | 6.57  | -7.16 | 1.52E-10 | 4.80E-09 | 13.68 |
| ILMN_1660413 | SGK2      | -0.36 | 6.79  | -7.16 | 1.53E-10 | 4.83E-09 | 13.67 |
| ILMN_1804955 | CTSF      | 0.27  | 7.07  | 7.16  | 1.53E-10 | 4.83E-09 | 13.67 |
| ILMN_1748908 | PROSC     | -0.33 | 9.47  | -7.15 | 1.55E-10 | 4.87E-09 | 13.66 |
| ILMN_1709153 | PRR16     | 0.26  | 6.63  | 7.15  | 1.57E-10 | 4.94E-09 | 13.65 |
| ILMN_1790508 | KCNA5     | 0.22  | 6.61  | 7.15  | 1.59E-10 | 5.00E-09 | 13.63 |
| ILMN_1656145 | GOT1      | -0.47 | 9.97  | -7.15 | 1.60E-10 | 5.05E-09 | 13.62 |
| ILMN_2107613 | RHOJ      | 0.31  | 6.93  | 7.14  | 1.65E-10 | 5.19E-09 | 13.60 |
| ILMN_1736077 | LIAS      | -0.36 | 7.74  | -7.14 | 1.66E-10 | 5.22E-09 | 13.59 |
| ILMN_1728083 | EIF4EBP2  | -0.38 | 8.70  | -7.14 | 1.67E-10 | 5.22E-09 | 13.59 |
| ILMN_1746888 | PCOLCE2   | 0.62  | 6.84  | 7.14  | 1.67E-10 | 5.25E-09 | 13.58 |
| ILMN_1761058 | NA        | 0.28  | 7.91  | 7.14  | 1.69E-10 | 5.28E-09 | 13.58 |
| ILMN_3301749 | SPNS2     | 0.64  | 7.46  | 7.13  | 1.71E-10 | 5.34E-09 | 13.56 |

|              |           |       |       |       |          |          |       |
|--------------|-----------|-------|-------|-------|----------|----------|-------|
| ILMN_2380237 | C1QTNF1   | 0.58  | 7.89  | 7.13  | 1.71E-10 | 5.35E-09 | 13.56 |
| ILMN_2415235 | CSNK1E    | 0.34  | 9.16  | 7.13  | 1.71E-10 | 5.35E-09 | 13.56 |
| ILMN_1661363 | NA        | 0.32  | 6.96  | 7.13  | 1.72E-10 | 5.38E-09 | 13.56 |
| ILMN_2044927 | RNF5      | -0.31 | 7.36  | -7.13 | 1.74E-10 | 5.44E-09 | 13.54 |
| ILMN_1651826 | BASP1     | 1.12  | 9.42  | 7.13  | 1.75E-10 | 5.45E-09 | 13.54 |
| ILMN_1757872 | SGK223    | -0.41 | 7.98  | -7.13 | 1.77E-10 | 5.50E-09 | 13.53 |
| ILMN_3309468 | FOXD2-AS1 | -0.28 | 6.85  | -7.13 | 1.77E-10 | 5.50E-09 | 13.53 |
| ILMN_1687768 | NCOA7     | 0.67  | 9.51  | 7.12  | 1.78E-10 | 5.52E-09 | 13.52 |
| ILMN_1737715 | OSR2      | 0.28  | 6.65  | 7.12  | 1.78E-10 | 5.54E-09 | 13.52 |
| ILMN_1766264 | PI16      | 0.54  | 6.79  | 7.12  | 1.79E-10 | 5.54E-09 | 13.52 |
| ILMN_2094266 | HES2      | -0.59 | 7.53  | -7.12 | 1.79E-10 | 5.55E-09 | 13.52 |
| ILMN_1705258 | CPZ       | 0.24  | 6.46  | 7.12  | 1.82E-10 | 5.64E-09 | 13.50 |
| ILMN_2136635 | ISCA2     | -0.20 | 6.96  | -7.12 | 1.83E-10 | 5.66E-09 | 13.50 |
| ILMN_1687501 | MOXD1     | 0.49  | 7.37  | 7.12  | 1.85E-10 | 5.70E-09 | 13.49 |
| ILMN_1689578 | TLR3      | -0.26 | 6.84  | -7.12 | 1.86E-10 | 5.73E-09 | 13.48 |
| ILMN_1774272 | ESRRA     | -0.46 | 8.22  | -7.11 | 1.86E-10 | 5.73E-09 | 13.48 |
| ILMN_2377900 | MAP1B     | 0.58  | 7.56  | 7.11  | 1.86E-10 | 5.74E-09 | 13.48 |
| ILMN_1713744 | C14orf132 | 0.39  | 7.46  | 7.11  | 1.86E-10 | 5.74E-09 | 13.48 |
| ILMN_2148913 | TMEM45A   | 0.31  | 6.89  | 7.11  | 1.87E-10 | 5.75E-09 | 13.48 |
| ILMN_1810486 | RAB34     | 0.31  | 7.04  | 7.11  | 1.88E-10 | 5.78E-09 | 13.47 |
| ILMN_2398159 | DKK3      | 0.72  | 9.27  | 7.11  | 1.89E-10 | 5.81E-09 | 13.46 |
| ILMN_1677092 | GEM       | 0.86  | 7.25  | 7.11  | 1.92E-10 | 5.87E-09 | 13.45 |
| ILMN_1782429 | TMEM56    | -0.50 | 7.02  | -7.11 | 1.93E-10 | 5.90E-09 | 13.45 |
| ILMN_1911042 | PIP4K2A   | 0.64  | 9.98  | 7.11  | 1.94E-10 | 5.94E-09 | 13.44 |
| ILMN_1676248 | SEMA4G    | -0.42 | 7.40  | -7.10 | 1.95E-10 | 5.97E-09 | 13.43 |
| ILMN_1696675 | CES2      | -0.73 | 11.23 | -7.11 | 2.00E-10 | 6.11E-09 | 13.41 |
| ILMN_1678678 | SLC37A4   | -0.57 | 9.42  | -7.11 | 2.02E-10 | 6.16E-09 | 13.41 |
| ILMN_1764380 | GLTP      | -0.45 | 10.67 | -7.10 | 2.03E-10 | 6.18E-09 | 13.40 |
| ILMN_3243381 | MLEC      | -0.40 | 9.52  | -7.10 | 2.03E-10 | 6.18E-09 | 13.40 |
| ILMN_2405254 | GRB7      | -0.35 | 7.11  | -7.09 | 2.04E-10 | 6.23E-09 | 13.39 |
| ILMN_2382942 | CA12      | -0.79 | 8.22  | -7.09 | 2.05E-10 | 6.25E-09 | 13.38 |
| ILMN_2180371 | FAM216A   | 0.24  | 6.75  | 7.09  | 2.06E-10 | 6.25E-09 | 13.38 |
| ILMN_1670844 | OPN3      | -0.22 | 6.61  | -7.09 | 2.08E-10 | 6.30E-09 | 13.37 |
| ILMN_1753016 | MRPL35    | -0.37 | 7.65  | -7.09 | 2.07E-10 | 6.30E-09 | 13.37 |
| ILMN_1656951 | APCDD1    | 0.45  | 7.25  | 7.09  | 2.14E-10 | 6.50E-09 | 13.34 |
| ILMN_1732534 | CHMP5     | -0.34 | 9.41  | -7.08 | 2.22E-10 | 6.73E-09 | 13.31 |
| ILMN_2083469 | IRS2      | 0.59  | 8.32  | 7.08  | 2.23E-10 | 6.76E-09 | 13.30 |
| ILMN_2371053 | EFNA1     | -0.61 | 7.65  | -7.08 | 2.25E-10 | 6.80E-09 | 13.30 |
| ILMN_1754969 | LMCD1     | 0.81  | 7.50  | 7.07  | 2.27E-10 | 6.87E-09 | 13.28 |
| ILMN_1712046 | CPXM1     | 0.42  | 7.06  | 7.08  | 2.28E-10 | 6.88E-09 | 13.29 |
| ILMN_3197097 | TSTD1     | -0.36 | 7.64  | -7.07 | 2.28E-10 | 6.89E-09 | 13.28 |
| ILMN_1710544 | PCDH7     | 0.22  | 6.64  | 7.07  | 2.29E-10 | 6.90E-09 | 13.28 |
| ILMN_1808047 | PHC2      | 0.32  | 7.12  | 7.07  | 2.30E-10 | 6.92E-09 | 13.27 |
| ILMN_2097858 | CIPC      | -0.51 | 9.04  | -7.07 | 2.33E-10 | 7.02E-09 | 13.26 |
| ILMN_1736042 | ME1       | 0.77  | 7.83  | 7.07  | 2.34E-10 | 7.03E-09 | 13.26 |
| ILMN_1751276 | BDNF      | 0.21  | 6.52  | 7.06  | 2.38E-10 | 7.13E-09 | 13.24 |
| ILMN_1754738 | AP1M1     | 0.35  | 8.02  | 7.06  | 2.38E-10 | 7.13E-09 | 13.24 |
| ILMN_2305407 | ZBTB16    | 0.77  | 7.13  | 7.06  | 2.38E-10 | 7.13E-09 | 13.24 |



|              |           |       |       |       |          |          |       |
|--------------|-----------|-------|-------|-------|----------|----------|-------|
| ILMN_3242205 | GMPS      | 0.30  | 7.80  | 7.06  | 2.38E-10 | 7.13E-09 | 13.24 |
| ILMN_1682176 | CLEC3B    | 0.49  | 7.37  | 7.06  | 2.40E-10 | 7.17E-09 | 13.23 |
| ILMN_1799589 | NOXA1     | -0.43 | 7.70  | -7.07 | 2.43E-10 | 7.26E-09 | 13.22 |
| ILMN_2364384 | PPARG     | -0.60 | 8.31  | -7.06 | 2.43E-10 | 7.27E-09 | 13.22 |
| ILMN_1727402 | HCLS1     | 0.95  | 8.91  | 7.06  | 2.46E-10 | 7.35E-09 | 13.21 |
| ILMN_1699585 | BHLHE22   | 0.45  | 7.10  | 7.05  | 2.51E-10 | 7.48E-09 | 13.19 |
| ILMN_1799535 | GJB1      | -0.43 | 6.87  | -7.05 | 2.51E-10 | 7.48E-09 | 13.19 |
| ILMN_1678095 | SMPDL3B   | -0.42 | 7.66  | -7.05 | 2.52E-10 | 7.51E-09 | 13.18 |
| ILMN_2386982 | PRKCZ     | -0.45 | 8.42  | -7.05 | 2.54E-10 | 7.55E-09 | 13.18 |
| ILMN_2416019 | ENTPD8    | -0.61 | 7.49  | -7.05 | 2.55E-10 | 7.59E-09 | 13.17 |
| ILMN_1697652 | PLEKHB2   | -0.34 | 7.48  | -7.05 | 2.56E-10 | 7.60E-09 | 13.17 |
| ILMN_1662886 | KLHL34    | -0.24 | 6.54  | -7.05 | 2.57E-10 | 7.61E-09 | 13.17 |
| ILMN_1844408 | PLXNA2    | -0.36 | 7.37  | -7.05 | 2.57E-10 | 7.61E-09 | 13.17 |
| ILMN_2200917 | SLC4A7    | 0.41  | 8.82  | 7.04  | 2.62E-10 | 7.75E-09 | 13.15 |
| ILMN_2369756 | CEP112    | 0.24  | 6.70  | 7.04  | 2.63E-10 | 7.78E-09 | 13.14 |
| ILMN_3177285 | HNRNPR    | 0.31  | 10.15 | 7.04  | 2.64E-10 | 7.79E-09 | 13.14 |
| ILMN_1788347 | CIPC      | -0.54 | 8.65  | -7.04 | 2.65E-10 | 7.84E-09 | 13.13 |
| ILMN_1772261 | GLG1      | 0.27  | 10.05 | 7.04  | 2.68E-10 | 7.92E-09 | 13.12 |
| ILMN_1694426 | ROR2      | 0.28  | 6.72  | 7.05  | 2.69E-10 | 7.93E-09 | 13.13 |
| ILMN_1780334 | KCNJ2     | -0.54 | 7.64  | -7.05 | 2.69E-10 | 7.93E-09 | 13.12 |
| ILMN_1656826 | SH3RF1    | -0.32 | 7.74  | -7.04 | 2.70E-10 | 7.96E-09 | 13.12 |
| ILMN_2384056 | GPER1     | -0.73 | 7.43  | -7.04 | 2.76E-10 | 8.11E-09 | 13.10 |
| ILMN_1660086 | MYH11     | 1.02  | 11.32 | 7.03  | 2.77E-10 | 8.13E-09 | 13.09 |
| ILMN_1707649 | MPDZ      | 0.31  | 7.03  | 7.03  | 2.80E-10 | 8.23E-09 | 13.08 |
| ILMN_1695110 | BCAT2     | -0.43 | 7.96  | -7.03 | 2.81E-10 | 8.25E-09 | 13.08 |
| ILMN_1667417 | RAB23     | 0.38  | 7.27  | 7.04  | 2.83E-10 | 8.29E-09 | 13.08 |
| ILMN_1779034 | NADSYN1   | -0.48 | 8.44  | -7.03 | 2.83E-10 | 8.29E-09 | 13.07 |
| ILMN_1702633 | RETSAT    | -0.74 | 9.23  | -7.03 | 2.84E-10 | 8.32E-09 | 13.07 |
| ILMN_1722900 | NA        | 0.36  | 11.91 | 7.03  | 2.90E-10 | 8.49E-09 | 13.05 |
| ILMN_3236637 | PIP4K2A   | 0.65  | 8.98  | 7.02  | 2.95E-10 | 8.62E-09 | 13.03 |
| ILMN_1682775 | EDN1      | -0.65 | 8.19  | -7.02 | 2.96E-10 | 8.64E-09 | 13.03 |
| ILMN_2405305 | ARNTL     | 0.36  | 7.08  | 7.02  | 2.96E-10 | 8.64E-09 | 13.03 |
| ILMN_1714586 | VGLL3     | 0.31  | 6.54  | 7.02  | 2.99E-10 | 8.72E-09 | 13.02 |
| ILMN_1803338 | CCDC80    | 0.24  | 6.54  | 7.01  | 3.01E-10 | 8.77E-09 | 13.01 |
| ILMN_1727815 | CFI       | 0.73  | 7.51  | 7.01  | 3.02E-10 | 8.77E-09 | 13.01 |
| ILMN_1764609 | PWWP2B    | -0.41 | 7.81  | -7.01 | 3.04E-10 | 8.84E-09 | 13.00 |
| ILMN_1706268 | PTGDR     | -0.43 | 6.87  | -7.01 | 3.08E-10 | 8.93E-09 | 12.99 |
| ILMN_1668039 | GYPC      | 0.71  | 7.57  | 7.01  | 3.09E-10 | 8.96E-09 | 12.99 |
| ILMN_1769394 | PLCD1     | -0.50 | 7.43  | -7.00 | 3.14E-10 | 9.12E-09 | 12.97 |
| ILMN_1712305 | CYBRD1    | 0.71  | 9.25  | 7.01  | 3.15E-10 | 9.13E-09 | 12.97 |
| ILMN_1675956 | LYST      | 0.28  | 7.19  | 7.00  | 3.17E-10 | 9.18E-09 | 12.96 |
| ILMN_1808779 | CSTF3     | 0.22  | 8.07  | 7.00  | 3.18E-10 | 9.19E-09 | 12.96 |
| ILMN_1728478 | CXCL16    | 0.59  | 9.00  | 7.01  | 3.23E-10 | 9.35E-09 | 12.95 |
| ILMN_1800837 | CFDP1     | -0.87 | 8.97  | -7.00 | 3.25E-10 | 9.39E-09 | 12.94 |
| ILMN_1691341 | NA        | 1.00  | 8.78  | 7.00  | 3.27E-10 | 9.43E-09 | 12.93 |
| ILMN_1756928 | RTN1      | 0.29  | 6.77  | 7.00  | 3.27E-10 | 9.43E-09 | 12.93 |
| ILMN_1692219 | RAB11FIP1 | -0.53 | 10.80 | -6.99 | 3.31E-10 | 9.52E-09 | 12.92 |
| ILMN_1813671 | SLC25A1   | -0.42 | 7.93  | -6.99 | 3.31E-10 | 9.52E-09 | 12.92 |

|              |          |       |       |       |          |          |       |
|--------------|----------|-------|-------|-------|----------|----------|-------|
| ILMN_1782439 | CNN3     | 0.45  | 10.33 | 6.99  | 3.32E-10 | 9.54E-09 | 12.92 |
| ILMN_1687358 | TMPRSS4  | -0.34 | 7.08  | -6.99 | 3.40E-10 | 9.75E-09 | 12.89 |
| ILMN_2323087 | RBPMS    | 0.33  | 6.88  | 6.99  | 3.41E-10 | 9.79E-09 | 12.89 |
| ILMN_1795429 | VCL      | 0.38  | 11.12 | 6.99  | 3.43E-10 | 9.83E-09 | 12.88 |
| ILMN_1702775 | LRP5     | -0.37 | 8.51  | -6.98 | 3.45E-10 | 9.89E-09 | 12.88 |
| ILMN_2216637 | STK32B   | 0.20  | 6.56  | 6.99  | 3.45E-10 | 9.89E-09 | 12.88 |
| ILMN_1774982 | CDC42EP5 | -0.50 | 10.76 | -6.98 | 3.54E-10 | 1.01E-08 | 12.85 |
| ILMN_3269775 | TMEM251  | -0.32 | 8.15  | -6.98 | 3.60E-10 | 1.03E-08 | 12.84 |
| ILMN_2251225 | WDR78    | -0.30 | 6.64  | -6.98 | 3.64E-10 | 1.04E-08 | 12.83 |
| ILMN_1791296 | DPY19L1  | 0.41  | 8.19  | 6.97  | 3.69E-10 | 1.05E-08 | 12.81 |
| ILMN_1680453 | ITM2C    | -0.65 | 12.27 | -6.97 | 3.70E-10 | 1.06E-08 | 12.81 |
| ILMN_1683313 | ST3GAL1  | 0.42  | 7.44  | 6.97  | 3.74E-10 | 1.07E-08 | 12.80 |
| ILMN_1765578 | TIPARP   | 0.52  | 8.66  | 6.97  | 3.76E-10 | 1.07E-08 | 12.79 |
| ILMN_1787705 | ATP6V1B2 | 0.30  | 10.17 | 6.97  | 3.77E-10 | 1.07E-08 | 12.79 |
| ILMN_1679184 | NA       | -0.38 | 6.81  | -6.97 | 3.79E-10 | 1.08E-08 | 12.79 |
| ILMN_1795325 | ACTG2    | 1.35  | 11.23 | 6.97  | 3.79E-10 | 1.08E-08 | 12.79 |
| ILMN_1718629 | NRIP1    | -0.33 | 9.26  | -6.96 | 3.86E-10 | 1.09E-08 | 12.77 |
| ILMN_3268165 | RNF7     | -0.35 | 9.44  | -6.96 | 3.86E-10 | 1.09E-08 | 12.77 |
| ILMN_1800697 | LDB2     | 0.49  | 8.64  | 6.96  | 3.91E-10 | 1.11E-08 | 12.75 |
| ILMN_1790338 | PRRX2    | 0.40  | 6.87  | 6.96  | 3.94E-10 | 1.12E-08 | 12.75 |
| ILMN_1707475 | UBE2E2   | 0.45  | 7.44  | 6.96  | 3.97E-10 | 1.12E-08 | 12.75 |
| ILMN_1700001 | TCTA     | -0.32 | 7.58  | -6.96 | 3.98E-10 | 1.12E-08 | 12.74 |
| ILMN_2328835 | IP6K2    | -0.33 | 7.07  | -6.96 | 3.98E-10 | 1.12E-08 | 12.74 |
| ILMN_1815039 | RRP36    | 0.25  | 8.62  | 6.95  | 3.99E-10 | 1.13E-08 | 12.74 |
| ILMN_1656248 | CLMP     | 0.37  | 7.08  | 6.96  | 4.00E-10 | 1.13E-08 | 12.74 |
| ILMN_2113333 | LGALS9B  | -0.26 | 6.77  | -6.95 | 4.01E-10 | 1.13E-08 | 12.73 |
| ILMN_1693410 | NA       | -0.41 | 9.06  | -6.95 | 4.01E-10 | 1.13E-08 | 12.73 |
| ILMN_1766411 | AP1S2    | 0.60  | 8.27  | 6.95  | 4.14E-10 | 1.16E-08 | 12.70 |
| ILMN_1699603 | MRPL12   | -0.40 | 8.21  | -6.95 | 4.15E-10 | 1.17E-08 | 12.70 |
| ILMN_1795228 | ZFAND5   | 0.30  | 11.09 | 6.95  | 4.15E-10 | 1.17E-08 | 12.70 |
| ILMN_1790859 | PLAC9    | 0.51  | 7.15  | 6.94  | 4.21E-10 | 1.18E-08 | 12.68 |
| ILMN_1765044 | CUTC     | 0.30  | 7.64  | 6.95  | 4.23E-10 | 1.19E-08 | 12.68 |
| ILMN_1659678 | GABRA2   | -0.23 | 6.45  | -6.93 | 4.43E-10 | 1.24E-08 | 12.63 |
| ILMN_1686623 | CSF1R    | 0.92  | 9.04  | 6.94  | 4.44E-10 | 1.24E-08 | 12.64 |
| ILMN_1832879 | NA       | -0.32 | 7.58  | -6.93 | 4.56E-10 | 1.27E-08 | 12.61 |
| ILMN_2334350 | BTBD3    | -0.46 | 8.64  | -6.93 | 4.56E-10 | 1.27E-08 | 12.61 |
| ILMN_1773006 | FABP4    | 1.20  | 7.52  | 6.93  | 4.67E-10 | 1.30E-08 | 12.59 |
| ILMN_1764709 | MAFB     | 0.76  | 8.30  | 6.92  | 4.72E-10 | 1.32E-08 | 12.57 |
| ILMN_2117330 | NDUFB2   | -0.36 | 11.04 | -6.92 | 4.76E-10 | 1.33E-08 | 12.56 |
| ILMN_1814494 | SEMA6D   | -0.28 | 6.84  | -6.92 | 4.77E-10 | 1.33E-08 | 12.56 |
| ILMN_1775380 | SMOX     | 0.33  | 6.88  | 6.92  | 4.79E-10 | 1.33E-08 | 12.56 |
| ILMN_1799848 | ANKRD22  | 0.55  | 7.76  | 6.92  | 4.80E-10 | 1.33E-08 | 12.56 |
| ILMN_1731062 | NPY      | -0.45 | 6.83  | -6.91 | 4.84E-10 | 1.35E-08 | 12.55 |
| ILMN_1687821 | C16orf45 | 0.23  | 6.64  | 6.91  | 4.86E-10 | 1.35E-08 | 12.54 |
| ILMN_1665775 | 2-Mar    | -0.31 | 7.55  | -6.91 | 4.88E-10 | 1.35E-08 | 12.54 |
| ILMN_1714349 | GLCE     | -0.37 | 8.46  | -6.91 | 4.91E-10 | 1.36E-08 | 12.53 |
| ILMN_2352190 | CLIP2    | -0.33 | 7.49  | -6.91 | 4.93E-10 | 1.36E-08 | 12.53 |
| ILMN_1702636 | TUBB6    | 0.40  | 6.89  | 6.91  | 4.98E-10 | 1.38E-08 | 12.52 |

|              |          |       |       |       |          |          |       |
|--------------|----------|-------|-------|-------|----------|----------|-------|
| ILMN_1813704 | CEMIP    | 1.13  | 7.19  | 6.91  | 4.99E-10 | 1.38E-08 | 12.52 |
| ILMN_1748983 | RTN4     | -0.33 | 7.10  | -6.91 | 5.01E-10 | 1.38E-08 | 12.51 |
| ILMN_1686985 | MTM1     | -0.58 | 7.97  | -6.91 | 5.03E-10 | 1.39E-08 | 12.51 |
| ILMN_1782057 | ATP8B2   | 0.50  | 7.41  | 6.90  | 5.06E-10 | 1.40E-08 | 12.50 |
| ILMN_2389501 | HSD11B1  | 0.21  | 6.52  | 6.90  | 5.09E-10 | 1.40E-08 | 12.50 |
| ILMN_1698995 | DES      | 0.92  | 7.31  | 6.90  | 5.14E-10 | 1.41E-08 | 12.49 |
| ILMN_1733603 | NDUFC1   | -0.24 | 8.58  | -6.90 | 5.14E-10 | 1.41E-08 | 12.49 |
| ILMN_1743635 | ALG14    | -0.31 | 7.37  | -6.90 | 5.15E-10 | 1.42E-08 | 12.49 |
| ILMN_1741459 | CDK10    | -0.61 | 9.16  | -6.91 | 5.22E-10 | 1.43E-08 | 12.48 |
| ILMN_1660986 | PER3     | -0.39 | 7.11  | -6.90 | 5.26E-10 | 1.44E-08 | 12.47 |
| ILMN_1655011 | NA       | -0.50 | 8.62  | -6.89 | 5.32E-10 | 1.46E-08 | 12.46 |
| ILMN_1806533 | PDE7B    | 0.33  | 7.40  | 6.89  | 5.32E-10 | 1.46E-08 | 12.46 |
| ILMN_3246902 | ABCC6P1  | -0.26 | 6.72  | -6.89 | 5.32E-10 | 1.46E-08 | 12.46 |
| ILMN_2249920 | FYN      | 0.62  | 7.42  | 6.89  | 5.36E-10 | 1.47E-08 | 12.45 |
| ILMN_3243156 | AHNAK2   | 0.44  | 6.98  | 6.88  | 5.57E-10 | 1.52E-08 | 12.41 |
| ILMN_1783672 | SLC30A10 | -0.36 | 6.79  | -6.88 | 5.58E-10 | 1.52E-08 | 12.41 |
| ILMN_2139100 | SHISA5   | 0.35  | 9.20  | 6.88  | 5.58E-10 | 1.52E-08 | 12.41 |
| ILMN_1656378 | NMT2     | -0.28 | 7.77  | -6.88 | 5.62E-10 | 1.53E-08 | 12.40 |
| ILMN_1798700 | CHRNA1   | -0.30 | 6.67  | -6.88 | 5.66E-10 | 1.54E-08 | 12.39 |
| ILMN_2117508 | CTHRC1   | 0.36  | 6.71  | 6.88  | 5.72E-10 | 1.56E-08 | 12.39 |
| ILMN_1789733 | CLIP3    | 0.51  | 7.97  | 6.88  | 5.73E-10 | 1.56E-08 | 12.38 |
| ILMN_1766914 | MFAP4    | 0.77  | 9.72  | 6.87  | 5.90E-10 | 1.60E-08 | 12.35 |
| ILMN_1780153 | QTRT1    | -0.44 | 7.72  | -6.87 | 5.90E-10 | 1.60E-08 | 12.36 |
| ILMN_1758457 | TBC1D16  | 0.25  | 7.08  | 6.88  | 5.93E-10 | 1.61E-08 | 12.36 |
| ILMN_1802654 | GLT8D2   | 0.32  | 7.42  | 6.87  | 5.94E-10 | 1.61E-08 | 12.35 |
| ILMN_1704196 | DSG2     | -0.53 | 8.43  | -6.87 | 6.04E-10 | 1.64E-08 | 12.33 |
| ILMN_1805827 | PPA1     | 0.36  | 11.28 | 6.87  | 6.07E-10 | 1.65E-08 | 12.33 |
| ILMN_1668063 | FCN1     | 0.66  | 7.02  | 6.86  | 6.10E-10 | 1.65E-08 | 12.32 |
| ILMN_1701441 | LPAR1    | 0.37  | 8.85  | 6.86  | 6.16E-10 | 1.67E-08 | 12.31 |
| ILMN_2087692 | CYBRD1   | 0.70  | 9.55  | 6.86  | 6.28E-10 | 1.70E-08 | 12.29 |
| ILMN_1683888 | SRP72    | 0.32  | 8.19  | 6.86  | 6.30E-10 | 1.70E-08 | 12.29 |
| ILMN_1809495 | COX8A    | -0.34 | 11.92 | -6.86 | 6.32E-10 | 1.70E-08 | 12.29 |
| ILMN_1804522 | CCDC47   | -0.28 | 7.71  | -6.86 | 6.35E-10 | 1.71E-08 | 12.28 |
| ILMN_2230862 | GYG1     | 0.40  | 8.88  | 6.85  | 6.41E-10 | 1.73E-08 | 12.27 |
| ILMN_1760649 | PCK2     | -0.34 | 6.98  | -6.85 | 6.44E-10 | 1.73E-08 | 12.27 |
| ILMN_1715068 | AQP9     | 0.85  | 6.83  | 6.85  | 6.48E-10 | 1.74E-08 | 12.26 |
| ILMN_1770803 | BNIP2    | 0.32  | 8.42  | 6.85  | 6.52E-10 | 1.75E-08 | 12.26 |
| ILMN_1674941 | ANO6     | 0.48  | 7.88  | 6.85  | 6.64E-10 | 1.78E-08 | 12.24 |
| ILMN_1677396 | NDFIP2   | -0.43 | 10.28 | -6.85 | 6.64E-10 | 1.78E-08 | 12.24 |
| ILMN_1763260 | HIF1A    | 0.55  | 7.69  | 6.85  | 6.63E-10 | 1.78E-08 | 12.24 |
| ILMN_1813775 | GAK      | -0.43 | 10.32 | -6.85 | 6.64E-10 | 1.78E-08 | 12.24 |
| ILMN_3254481 | NA       | -0.40 | 7.15  | -6.85 | 6.65E-10 | 1.78E-08 | 12.24 |
| ILMN_1667831 | HOXB6    | -0.20 | 6.83  | -6.84 | 6.72E-10 | 1.80E-08 | 12.23 |
| ILMN_1750158 | ACOX1    | -0.67 | 8.84  | -6.84 | 6.74E-10 | 1.80E-08 | 12.22 |
| ILMN_2364674 | TRPT1    | -0.35 | 9.69  | -6.84 | 6.78E-10 | 1.81E-08 | 12.22 |
| ILMN_1738632 | PRKAR1A  | 0.41  | 10.49 | 6.84  | 6.80E-10 | 1.82E-08 | 12.22 |
| ILMN_1752665 | ELMO3    | -0.46 | 7.80  | -6.84 | 6.89E-10 | 1.84E-08 | 12.20 |
| ILMN_1753411 | ADCY10P1 | -0.24 | 6.96  | -6.84 | 6.94E-10 | 1.85E-08 | 12.20 |

|              |          |       |       |       |          |          |       |
|--------------|----------|-------|-------|-------|----------|----------|-------|
| ILMN_1689160 | DPEP2    | 0.31  | 6.90  | 6.83  | 7.04E-10 | 1.87E-08 | 12.18 |
| ILMN_1715113 | HARS2    | -0.26 | 9.45  | -6.84 | 7.08E-10 | 1.88E-08 | 12.18 |
| ILMN_1698404 | NA       | 0.58  | 7.46  | 6.83  | 7.15E-10 | 1.90E-08 | 12.17 |
| ILMN_1810864 | PMP22    | 0.59  | 7.19  | 6.83  | 7.22E-10 | 1.92E-08 | 12.16 |
| ILMN_1758281 | CALCRL   | 0.25  | 6.73  | 6.83  | 7.28E-10 | 1.93E-08 | 12.15 |
| ILMN_1839665 | NA       | -0.25 | 6.83  | -6.83 | 7.28E-10 | 1.93E-08 | 12.15 |
| ILMN_2177832 | TOR2A    | -0.24 | 6.86  | -6.83 | 7.28E-10 | 1.93E-08 | 12.15 |
| ILMN_1726547 | MAP3K5   | 0.36  | 8.64  | 6.83  | 7.35E-10 | 1.94E-08 | 12.15 |
| ILMN_1780898 | PRKCH    | 0.54  | 8.11  | 6.83  | 7.35E-10 | 1.94E-08 | 12.14 |
| ILMN_1775486 | SSPN     | 0.34  | 7.58  | 6.83  | 7.36E-10 | 1.95E-08 | 12.14 |
| ILMN_1722726 | ARHGAP32 | -0.43 | 9.08  | -6.82 | 7.41E-10 | 1.96E-08 | 12.13 |
| ILMN_1810100 | PBX3     | 0.44  | 8.24  | 6.83  | 7.46E-10 | 1.97E-08 | 12.13 |
| ILMN_2166457 | HPGD     | -0.78 | 9.59  | -6.82 | 7.50E-10 | 1.98E-08 | 12.12 |
| ILMN_1696749 | LMNA     | 0.59  | 8.95  | 6.83  | 7.53E-10 | 1.98E-08 | 12.12 |
| ILMN_2170949 | SNX10    | 0.37  | 7.06  | 6.82  | 7.66E-10 | 2.02E-08 | 12.10 |
| ILMN_2233878 | NA       | -0.37 | 7.52  | -6.81 | 7.74E-10 | 2.04E-08 | 12.09 |
| ILMN_2100437 | HBB      | 1.51  | 10.47 | 6.81  | 7.74E-10 | 2.04E-08 | 12.09 |
| ILMN_1667796 | NA       | 1.55  | 9.89  | 6.81  | 7.82E-10 | 2.05E-08 | 12.08 |
| ILMN_1671442 | WDR43    | 0.26  | 7.13  | 6.81  | 7.83E-10 | 2.06E-08 | 12.08 |
| ILMN_2388800 | PLPP3    | 0.60  | 9.35  | 6.81  | 7.87E-10 | 2.07E-08 | 12.07 |
| ILMN_1796349 | SMPDL3A  | -0.81 | 10.21 | -6.81 | 7.93E-10 | 2.08E-08 | 12.07 |
| ILMN_2412192 | CFH      | 0.59  | 8.02  | 6.81  | 7.92E-10 | 2.08E-08 | 12.07 |
| ILMN_1858624 | NA       | 0.28  | 6.64  | 6.81  | 7.94E-10 | 2.08E-08 | 12.07 |
| ILMN_2330307 | SLC43A3  | 0.25  | 6.79  | 6.81  | 7.96E-10 | 2.08E-08 | 12.06 |
| ILMN_1778236 | PTPN11   | 0.29  | 9.29  | 6.80  | 8.10E-10 | 2.12E-08 | 12.05 |
| ILMN_1814282 | AEN      | 0.44  | 7.89  | 6.80  | 8.18E-10 | 2.14E-08 | 12.04 |
| ILMN_1691572 | TST      | -0.76 | 12.07 | -6.80 | 8.25E-10 | 2.15E-08 | 12.03 |
| ILMN_1791726 | TUBB3    | 0.25  | 6.54  | 6.80  | 8.26E-10 | 2.15E-08 | 12.03 |
| ILMN_1713529 | SEMA6A   | -0.65 | 9.47  | -6.80 | 8.30E-10 | 2.16E-08 | 12.02 |
| ILMN_2398432 | BRMS1    | -0.30 | 9.57  | -6.80 | 8.33E-10 | 2.17E-08 | 12.02 |
| ILMN_1659350 | CASP6    | -0.29 | 7.01  | -6.79 | 8.57E-10 | 2.23E-08 | 11.99 |
| ILMN_1731688 | KLB      | -0.21 | 6.77  | -6.79 | 8.59E-10 | 2.23E-08 | 11.99 |
| ILMN_1671568 | ECHDC2   | -0.49 | 10.57 | -6.79 | 8.61E-10 | 2.24E-08 | 11.99 |
| ILMN_1747839 | NA       | -0.38 | 6.83  | -6.79 | 8.66E-10 | 2.25E-08 | 11.98 |
| ILMN_1724805 | CDHR5    | -0.39 | 6.99  | -6.79 | 8.72E-10 | 2.26E-08 | 11.97 |
| ILMN_1788283 | COTL1    | 0.39  | 7.11  | 6.79  | 8.94E-10 | 2.32E-08 | 11.96 |
| ILMN_2189859 | TMEM192  | -0.34 | 7.71  | -6.78 | 9.09E-10 | 2.36E-08 | 11.93 |
| ILMN_1710136 | PUDP     | -0.45 | 7.79  | -6.78 | 9.11E-10 | 2.36E-08 | 11.93 |
| ILMN_1758731 | CYP2J2   | -0.73 | 9.77  | -6.78 | 9.20E-10 | 2.38E-08 | 11.92 |
| ILMN_2059211 | TMEM94   | -0.34 | 7.29  | -6.78 | 9.21E-10 | 2.38E-08 | 11.92 |
| ILMN_1774071 | CD177    | -0.64 | 6.99  | -6.78 | 9.29E-10 | 2.40E-08 | 11.91 |
| ILMN_1658464 | GTF3A    | 0.41  | 9.76  | 6.78  | 9.31E-10 | 2.40E-08 | 11.91 |
| ILMN_1722858 | PPP2CA   | 0.25  | 11.11 | 6.77  | 9.35E-10 | 2.41E-08 | 11.91 |
| ILMN_1685493 | TMCC3    | -0.41 | 7.31  | -6.78 | 9.41E-10 | 2.42E-08 | 11.91 |
| ILMN_2394571 | FBXW11   | 0.24  | 8.78  | 6.77  | 9.41E-10 | 2.42E-08 | 11.90 |
| ILMN_1723662 | ABHD2    | 0.31  | 7.08  | 6.79  | 9.47E-10 | 2.44E-08 | 11.90 |
| ILMN_1776953 | MYL9     | 0.82  | 7.58  | 6.77  | 9.53E-10 | 2.45E-08 | 11.89 |
| ILMN_2319664 | NOX1     | -0.45 | 7.12  | -6.77 | 9.54E-10 | 2.45E-08 | 11.89 |

|              |           |       |       |       |          |          |       |
|--------------|-----------|-------|-------|-------|----------|----------|-------|
| ILMN_2350574 | MYADM     | 0.58  | 7.26  | 6.77  | 9.54E-10 | 2.45E-08 | 11.89 |
| ILMN_1728710 | ZNF816    | -0.29 | 7.86  | -6.77 | 9.58E-10 | 2.46E-08 | 11.88 |
| ILMN_1697115 | CEBPA-AS1 | -0.31 | 7.17  | -6.77 | 9.66E-10 | 2.47E-08 | 11.88 |
| ILMN_1682928 | CPVL      | 0.69  | 7.78  | 6.77  | 9.67E-10 | 2.48E-08 | 11.87 |
| ILMN_2359287 | ITGA6     | 0.49  | 7.95  | 6.77  | 9.69E-10 | 2.48E-08 | 11.87 |
| ILMN_3251317 | RER1      | -0.47 | 7.88  | -6.77 | 9.72E-10 | 2.48E-08 | 11.87 |
| ILMN_1705813 | CFTR      | -0.69 | 8.97  | -6.77 | 9.74E-10 | 2.49E-08 | 11.87 |
| ILMN_1799106 | 1-Mar     | -0.41 | 7.50  | -6.76 | 9.92E-10 | 2.53E-08 | 11.85 |
| ILMN_2348788 | CD44      | 0.70  | 8.38  | 6.76  | 9.94E-10 | 2.54E-08 | 11.85 |
| ILMN_1723481 | CHST3     | 0.34  | 7.00  | 6.76  | 9.96E-10 | 2.54E-08 | 11.85 |
| ILMN_1709479 | YAP1      | 0.44  | 8.26  | 6.76  | 9.97E-10 | 2.54E-08 | 11.84 |
| ILMN_2278518 | NFATC2IP  | -0.34 | 7.00  | -6.76 | 1.00E-09 | 2.55E-08 | 11.84 |
| ILMN_1668743 | RILPL2    | 0.39  | 7.21  | 6.76  | 1.02E-09 | 2.60E-08 | 11.82 |
| ILMN_1807397 | NDUFB5    | -0.30 | 11.14 | -6.76 | 1.02E-09 | 2.60E-08 | 11.82 |
| ILMN_1747318 | PATJ      | -0.24 | 6.94  | -6.75 | 1.03E-09 | 2.61E-08 | 11.81 |
| ILMN_1801710 | APBB1IP   | 0.53  | 7.58  | 6.75  | 1.03E-09 | 2.61E-08 | 11.81 |
| ILMN_1803811 | TRIB1     | 0.56  | 10.26 | 6.75  | 1.03E-09 | 2.61E-08 | 11.81 |
| ILMN_2360415 | PRNP      | 0.67  | 8.43  | 6.75  | 1.03E-09 | 2.61E-08 | 11.81 |
| ILMN_2071446 | PI15      | 0.35  | 7.02  | 6.75  | 1.04E-09 | 2.64E-08 | 11.80 |
| ILMN_1772359 | LAPTM5    | 0.85  | 8.28  | 6.75  | 1.04E-09 | 2.64E-08 | 11.80 |
| ILMN_1771223 | PADI2     | -0.24 | 6.83  | -6.75 | 1.06E-09 | 2.68E-08 | 11.78 |
| ILMN_1654685 | MCTP1     | 0.26  | 6.59  | 6.75  | 1.07E-09 | 2.69E-08 | 11.78 |
| ILMN_2403446 | ABHD2     | 0.26  | 6.79  | 6.74  | 1.07E-09 | 2.71E-08 | 11.77 |
| ILMN_1667257 | SDHB      | -0.35 | 10.63 | -6.74 | 1.08E-09 | 2.73E-08 | 11.76 |
| ILMN_1756355 | NDUFS3    | -0.40 | 10.68 | -6.74 | 1.08E-09 | 2.73E-08 | 11.76 |
| ILMN_1694223 | DGCR8     | -0.29 | 7.70  | -6.74 | 1.10E-09 | 2.77E-08 | 11.75 |
| ILMN_1809245 | PITPNB    | 0.26  | 7.24  | 6.74  | 1.10E-09 | 2.77E-08 | 11.75 |
| ILMN_1659610 | TJP3      | -0.67 | 9.43  | -6.75 | 1.11E-09 | 2.78E-08 | 11.75 |
| ILMN_2094166 | CHMP5     | -0.43 | 8.98  | -6.74 | 1.11E-09 | 2.78E-08 | 11.74 |
| ILMN_1752027 | UBE3B     | -0.28 | 7.51  | -6.74 | 1.11E-09 | 2.80E-08 | 11.74 |
| ILMN_1674698 | AARS2     | -0.24 | 7.52  | -6.74 | 1.12E-09 | 2.81E-08 | 11.73 |
| ILMN_2052891 | PKD2      | 0.39  | 8.02  | 6.74  | 1.12E-09 | 2.81E-08 | 11.73 |
| ILMN_2410523 | DDR2      | 0.52  | 7.49  | 6.74  | 1.12E-09 | 2.81E-08 | 11.73 |
| ILMN_1743663 | POMT1     | -0.23 | 7.32  | -6.73 | 1.13E-09 | 2.83E-08 | 11.72 |
| ILMN_1708482 | TMEM80    | -0.33 | 7.46  | -6.73 | 1.14E-09 | 2.85E-08 | 11.71 |
| ILMN_1705247 | ACSL5     | -0.58 | 10.72 | -6.73 | 1.15E-09 | 2.88E-08 | 11.70 |
| ILMN_1662587 | PNPLA7    | -0.61 | 8.45  | -6.73 | 1.16E-09 | 2.89E-08 | 11.70 |
| ILMN_1805750 | IFITM3    | 0.74  | 10.45 | 6.73  | 1.16E-09 | 2.90E-08 | 11.70 |
| ILMN_1759870 | NA        | -0.20 | 6.97  | -6.73 | 1.17E-09 | 2.92E-08 | 11.69 |
| ILMN_1661631 | LILRA3    | 0.35  | 6.53  | 6.73  | 1.18E-09 | 2.94E-08 | 11.68 |
| ILMN_1656621 | CHMP2A    | -0.39 | 8.00  | -6.72 | 1.19E-09 | 2.98E-08 | 11.67 |
| ILMN_1738572 | USP48     | 0.32  | 7.21  | 6.72  | 1.20E-09 | 2.98E-08 | 11.67 |
| ILMN_2408946 | PDE8A     | -0.29 | 7.04  | -6.72 | 1.23E-09 | 3.07E-08 | 11.64 |
| ILMN_1678493 | CHN1      | 0.44  | 7.08  | 6.71  | 1.24E-09 | 3.08E-08 | 11.63 |
| ILMN_1761083 | HNRNPA3   | 0.40  | 7.63  | 6.71  | 1.24E-09 | 3.09E-08 | 11.63 |
| ILMN_1764410 | GUCD1     | -0.37 | 9.87  | -6.71 | 1.24E-09 | 3.09E-08 | 11.63 |
| ILMN_1785175 | SWAP70    | 0.52  | 8.59  | 6.71  | 1.25E-09 | 3.11E-08 | 11.62 |
| ILMN_1681890 | DYNLT3    | 0.31  | 8.64  | 6.71  | 1.26E-09 | 3.12E-08 | 11.62 |

|              |          |       |       |       |          |          |       |
|--------------|----------|-------|-------|-------|----------|----------|-------|
| ILMN_1667893 | TNS3     | -0.34 | 9.80  | -6.71 | 1.26E-09 | 3.13E-08 | 11.61 |
| ILMN_1672350 | JAM2     | 0.32  | 7.31  | 6.71  | 1.28E-09 | 3.17E-08 | 11.60 |
| ILMN_1749009 | REXO2    | 0.32  | 9.99  | 6.71  | 1.29E-09 | 3.19E-08 | 11.59 |
| ILMN_1701918 | KLHDC9   | -0.31 | 7.11  | -6.71 | 1.29E-09 | 3.19E-08 | 11.59 |
| ILMN_1695945 | MEIS2    | 0.45  | 7.10  | 6.70  | 1.30E-09 | 3.20E-08 | 11.59 |
| ILMN_2373062 | RHBDF2   | 0.42  | 7.44  | 6.71  | 1.31E-09 | 3.22E-08 | 11.59 |
| ILMN_1718982 | BEST1    | 0.19  | 6.69  | 6.70  | 1.31E-09 | 3.23E-08 | 11.58 |
| ILMN_2103761 | TLE4     | 0.31  | 7.97  | 6.71  | 1.31E-09 | 3.23E-08 | 11.58 |
| ILMN_1739840 | LRRRC8A  | 0.34  | 7.24  | 6.70  | 1.31E-09 | 3.24E-08 | 11.57 |
| ILMN_1780060 | FCN3     | 0.39  | 6.63  | 6.70  | 1.31E-09 | 3.24E-08 | 11.58 |
| ILMN_1730998 | TSPAN6   | -0.66 | 8.90  | -6.70 | 1.33E-09 | 3.27E-08 | 11.56 |
| ILMN_2120022 | ARL5B    | 0.35  | 7.41  | 6.70  | 1.34E-09 | 3.29E-08 | 11.56 |
| ILMN_3263575 | NA       | -0.83 | 8.18  | -6.70 | 1.34E-09 | 3.29E-08 | 11.56 |
| ILMN_1794470 | ANKFY1   | -0.24 | 8.58  | -6.70 | 1.34E-09 | 3.29E-08 | 11.55 |
| ILMN_1741465 | PTPRH    | -0.57 | 8.19  | -6.70 | 1.34E-09 | 3.30E-08 | 11.55 |
| ILMN_1679719 | NA       | -0.45 | 6.79  | -6.69 | 1.36E-09 | 3.34E-08 | 11.54 |
| ILMN_1663538 | CLYBL    | -0.50 | 8.65  | -6.69 | 1.37E-09 | 3.36E-08 | 11.53 |
| ILMN_2341229 | CD34     | 0.47  | 8.34  | 6.69  | 1.40E-09 | 3.43E-08 | 11.51 |
| ILMN_2143795 | NA       | 0.72  | 8.92  | 6.69  | 1.42E-09 | 3.48E-08 | 11.50 |
| ILMN_1701308 | COL1A1   | 1.01  | 8.89  | 6.68  | 1.42E-09 | 3.48E-08 | 11.50 |
| ILMN_1719250 | SLC44A4  | -0.57 | 10.17 | -6.68 | 1.43E-09 | 3.49E-08 | 11.49 |
| ILMN_1733627 | NEDD4L   | -0.70 | 8.60  | -6.68 | 1.44E-09 | 3.52E-08 | 11.48 |
| ILMN_1741422 | FUT8     | 0.58  | 7.55  | 6.68  | 1.44E-09 | 3.52E-08 | 11.48 |
| ILMN_1696419 | STOM     | 0.49  | 7.50  | 6.68  | 1.45E-09 | 3.54E-08 | 11.48 |
| ILMN_3253456 | FNDC3B   | 0.34  | 9.26  | 6.68  | 1.45E-09 | 3.54E-08 | 11.48 |
| ILMN_1759991 | NOL12    | -0.39 | 9.08  | -6.68 | 1.46E-09 | 3.56E-08 | 11.47 |
| ILMN_3178302 | FNDC3B   | 0.36  | 9.22  | 6.68  | 1.46E-09 | 3.56E-08 | 11.47 |
| ILMN_1806165 | NA       | 0.68  | 7.47  | 6.68  | 1.47E-09 | 3.56E-08 | 11.47 |
| ILMN_1811364 | NA       | -0.60 | 9.89  | -6.68 | 1.47E-09 | 3.57E-08 | 11.47 |
| ILMN_1690484 | KIAA0895 | 0.22  | 6.70  | 6.68  | 1.47E-09 | 3.58E-08 | 11.46 |
| ILMN_1763322 | CCR3     | 0.27  | 6.52  | 6.68  | 1.48E-09 | 3.59E-08 | 11.46 |
| ILMN_2351241 | RNF14    | -0.29 | 7.99  | -6.67 | 1.51E-09 | 3.66E-08 | 11.44 |
| ILMN_1740949 | LRRRC19  | -0.59 | 7.96  | -6.67 | 1.52E-09 | 3.68E-08 | 11.43 |
| ILMN_1742025 | OLFM1    | 0.56  | 7.72  | 6.67  | 1.52E-09 | 3.69E-08 | 11.43 |
| ILMN_1855746 | NA       | -0.32 | 7.80  | -6.68 | 1.53E-09 | 3.71E-08 | 11.43 |
| ILMN_1749131 | ENPP3    | -0.47 | 6.97  | -6.67 | 1.54E-09 | 3.72E-08 | 11.42 |
| ILMN_1682864 | SPSB3    | -0.34 | 9.07  | -6.66 | 1.57E-09 | 3.80E-08 | 11.40 |
| ILMN_1704477 | COX5A    | -0.39 | 12.11 | -6.66 | 1.58E-09 | 3.82E-08 | 11.39 |
| ILMN_2109489 | GZMB     | 0.42  | 6.67  | 6.66  | 1.59E-09 | 3.83E-08 | 11.39 |
| ILMN_1901947 | NA       | -0.24 | 7.20  | -6.66 | 1.59E-09 | 3.84E-08 | 11.39 |
| ILMN_1704557 | RPS6KB1  | 0.28  | 8.70  | 6.66  | 1.60E-09 | 3.85E-08 | 11.38 |
| ILMN_2342437 | KLHL5    | 0.35  | 6.80  | 6.67  | 1.61E-09 | 3.87E-08 | 11.38 |
| ILMN_2308950 | AKAP12   | 0.38  | 6.85  | 6.66  | 1.61E-09 | 3.88E-08 | 11.38 |
| ILMN_1685387 | PIGR     | -0.75 | 12.41 | -6.66 | 1.62E-09 | 3.90E-08 | 11.38 |
| ILMN_1872457 | NA       | 0.30  | 6.65  | 6.67  | 1.63E-09 | 3.91E-08 | 11.38 |
| ILMN_2184966 | ZHX2     | 0.34  | 7.32  | 6.65  | 1.65E-09 | 3.97E-08 | 11.35 |
| ILMN_1655077 | PRDM1    | 0.64  | 8.46  | 6.66  | 1.68E-09 | 4.03E-08 | 11.34 |
| ILMN_1675448 | ZFP36L1  | 0.57  | 8.68  | 6.65  | 1.69E-09 | 4.04E-08 | 11.33 |

|              |          |       |       |       |          |          |       |
|--------------|----------|-------|-------|-------|----------|----------|-------|
| ILMN_1800733 | MANBA    | 0.28  | 7.87  | 6.64  | 1.74E-09 | 4.16E-08 | 11.30 |
| ILMN_1765446 | EMP3     | 0.74  | 8.68  | 6.64  | 1.74E-09 | 4.17E-08 | 11.30 |
| ILMN_1746801 | CGN      | -0.93 | 10.08 | -6.64 | 1.75E-09 | 4.18E-08 | 11.30 |
| ILMN_1761764 | ALKBH7   | -0.34 | 7.80  | -6.64 | 1.75E-09 | 4.18E-08 | 11.30 |
| ILMN_1745849 | ENTPD5   | -0.59 | 7.77  | -6.64 | 1.75E-09 | 4.19E-08 | 11.29 |
| ILMN_1693388 | NOXO1    | -0.28 | 6.80  | -6.64 | 1.75E-09 | 4.19E-08 | 11.29 |
| ILMN_1774062 | SLC25A5  | -0.28 | 13.02 | -6.64 | 1.76E-09 | 4.19E-08 | 11.29 |
| ILMN_2155998 | PSMD6    | 0.22  | 10.31 | 6.64  | 1.77E-09 | 4.23E-08 | 11.28 |
| ILMN_1811972 | MYCBP2   | 0.39  | 8.41  | 6.63  | 1.81E-09 | 4.31E-08 | 11.26 |
| ILMN_1705663 | DMXL2    | -0.27 | 7.27  | -6.63 | 1.85E-09 | 4.41E-08 | 11.24 |
| ILMN_1722533 | KATNAL1  | 0.28  | 7.16  | 6.63  | 1.85E-09 | 4.41E-08 | 11.24 |
| ILMN_1766010 | YARS     | 0.36  | 8.96  | 6.63  | 1.86E-09 | 4.42E-08 | 11.24 |
| ILMN_2367258 | SMOX     | 0.39  | 6.69  | 6.63  | 1.86E-09 | 4.42E-08 | 11.24 |
| ILMN_1908918 | SDIM1    | 0.29  | 6.60  | 6.63  | 1.87E-09 | 4.44E-08 | 11.23 |
| ILMN_1781943 | FAM83D   | 0.57  | 7.09  | 6.63  | 1.87E-09 | 4.44E-08 | 11.23 |
| ILMN_1708934 | ADM      | 0.81  | 10.40 | 6.63  | 1.87E-09 | 4.44E-08 | 11.23 |
| ILMN_1678919 | YOD1     | 0.40  | 7.81  | 6.62  | 1.89E-09 | 4.47E-08 | 11.22 |
| ILMN_1811551 | DERA     | -0.36 | 10.17 | -6.63 | 1.90E-09 | 4.50E-08 | 11.22 |
| ILMN_1683980 | PLEKHM2  | 0.26  | 8.55  | 6.62  | 1.91E-09 | 4.52E-08 | 11.21 |
| ILMN_1692754 | VMP1     | 0.37  | 9.73  | 6.62  | 1.92E-09 | 4.55E-08 | 11.20 |
| ILMN_2379788 | HIF1A    | 0.51  | 7.84  | 6.62  | 1.94E-09 | 4.58E-08 | 11.20 |
| ILMN_1839719 | NA       | -0.31 | 8.24  | -6.62 | 1.97E-09 | 4.64E-08 | 11.18 |
| ILMN_2060145 | GRHL2    | -0.30 | 7.10  | -6.62 | 1.97E-09 | 4.64E-08 | 11.18 |
| ILMN_1762106 | MMP2     | 0.20  | 6.57  | 6.62  | 1.97E-09 | 4.65E-08 | 11.18 |
| ILMN_1663035 | SREBF1   | -0.36 | 7.67  | -6.61 | 1.98E-09 | 4.66E-08 | 11.18 |
| ILMN_1724333 | TOR1B    | -0.33 | 8.05  | -6.61 | 1.98E-09 | 4.67E-08 | 11.17 |
| ILMN_1701940 | FAM73B   | -0.31 | 7.53  | -6.61 | 2.00E-09 | 4.69E-08 | 11.17 |
| ILMN_2355033 | KIAA1147 | -0.35 | 9.90  | -6.61 | 2.00E-09 | 4.69E-08 | 11.17 |
| ILMN_2052163 | YIPF1    | -0.25 | 9.42  | -6.61 | 2.02E-09 | 4.76E-08 | 11.15 |
| ILMN_2336609 | SYTL2    | -0.64 | 10.97 | -6.60 | 2.09E-09 | 4.90E-08 | 11.13 |
| ILMN_1705849 | SPR      | -0.74 | 7.86  | -6.60 | 2.11E-09 | 4.96E-08 | 11.11 |
| ILMN_1733415 | MFAP5    | 0.95  | 8.27  | 6.60  | 2.11E-09 | 4.96E-08 | 11.11 |
| ILMN_1765860 | DOCK11   | 0.63  | 8.02  | 6.61  | 2.12E-09 | 4.97E-08 | 11.11 |
| ILMN_2189675 | HRCT1    | -0.65 | 7.12  | -6.60 | 2.12E-09 | 4.97E-08 | 11.11 |
| ILMN_2358541 | RBMS1    | 0.30  | 6.86  | 6.61  | 2.18E-09 | 5.11E-08 | 11.09 |
| ILMN_1812777 | MRPL35   | -0.49 | 8.35  | -6.59 | 2.20E-09 | 5.15E-08 | 11.07 |
| ILMN_1678300 | NA       | 0.29  | 7.47  | 6.59  | 2.22E-09 | 5.18E-08 | 11.07 |
| ILMN_1800225 | PPARG    | -0.50 | 9.87  | -6.59 | 2.23E-09 | 5.21E-08 | 11.06 |
| ILMN_3306730 | RBM47    | -0.53 | 11.10 | -6.60 | 2.23E-09 | 5.21E-08 | 11.06 |
| ILMN_1671895 | ZNF613   | -0.40 | 7.84  | -6.59 | 2.25E-09 | 5.24E-08 | 11.05 |
| ILMN_1770787 | DDAH2    | -0.36 | 7.33  | -6.59 | 2.25E-09 | 5.25E-08 | 11.05 |
| ILMN_1692731 | TTYH3    | 0.46  | 7.68  | 6.59  | 2.26E-09 | 5.26E-08 | 11.05 |
| ILMN_1729170 | GPA33    | -0.73 | 10.83 | -6.58 | 2.30E-09 | 5.36E-08 | 11.03 |
| ILMN_2344204 | PRR13    | -0.34 | 12.65 | -6.58 | 2.30E-09 | 5.36E-08 | 11.03 |
| ILMN_3238680 | C7orf55  | -0.51 | 8.80  | -6.58 | 2.31E-09 | 5.38E-08 | 11.02 |
| ILMN_1710078 | TMEM181  | -0.30 | 10.18 | -6.58 | 2.32E-09 | 5.38E-08 | 11.02 |
| ILMN_1770085 | BTG2     | 0.65  | 8.61  | 6.58  | 2.32E-09 | 5.38E-08 | 11.02 |
| ILMN_1710523 | ATP8B1   | -0.37 | 7.31  | -6.58 | 2.32E-09 | 5.38E-08 | 11.02 |

|              |          |       |       |       |          |          |       |
|--------------|----------|-------|-------|-------|----------|----------|-------|
| ILMN_2308582 | CYB5R3   | 0.26  | 11.19 | 6.58  | 2.36E-09 | 5.47E-08 | 11.00 |
| ILMN_1669057 | NA       | -0.27 | 6.88  | -6.58 | 2.36E-09 | 5.47E-08 | 11.00 |
| ILMN_2101278 | RGS18    | 0.38  | 6.98  | 6.57  | 2.38E-09 | 5.51E-08 | 11.00 |
| ILMN_1781285 | DUSP1    | 1.14  | 10.57 | 6.57  | 2.44E-09 | 5.65E-08 | 10.97 |
| ILMN_1718988 | DAZAP2   | -0.25 | 11.94 | -6.57 | 2.47E-09 | 5.70E-08 | 10.96 |
| ILMN_1663975 | CNNM2    | -0.28 | 6.82  | -6.57 | 2.47E-09 | 5.72E-08 | 10.96 |
| ILMN_1695645 | CETN2    | 0.33  | 9.50  | 6.57  | 2.49E-09 | 5.75E-08 | 10.95 |
| ILMN_1766408 | CBFB     | 0.40  | 8.18  | 6.57  | 2.49E-09 | 5.75E-08 | 10.96 |
| ILMN_1714278 | MSANTD3  | 0.29  | 7.16  | 6.56  | 2.53E-09 | 5.83E-08 | 10.94 |
| ILMN_1669928 | ARHGEF16 | -0.56 | 9.13  | -6.56 | 2.54E-09 | 5.86E-08 | 10.93 |
| ILMN_1765109 | TNFRSF25 | -0.59 | 8.11  | -6.56 | 2.59E-09 | 5.96E-08 | 10.91 |
| ILMN_2068104 | TFPI2    | 0.39  | 6.69  | 6.56  | 2.59E-09 | 5.97E-08 | 10.91 |
| ILMN_1761789 | CA7      | -0.95 | 7.45  | -6.55 | 2.70E-09 | 6.22E-08 | 10.87 |
| ILMN_1761260 | COBLL1   | 0.33  | 9.08  | 6.55  | 2.73E-09 | 6.27E-08 | 10.86 |
| ILMN_1755710 | EFNA4    | -0.31 | 7.19  | -6.55 | 2.74E-09 | 6.29E-08 | 10.87 |
| ILMN_1748831 | PPP1R13B | -0.40 | 8.24  | -6.55 | 2.75E-09 | 6.30E-08 | 10.86 |
| ILMN_1657554 | TSPYL2   | 0.32  | 7.04  | 6.54  | 2.77E-09 | 6.36E-08 | 10.85 |
| ILMN_1724994 | COL4A2   | 0.46  | 7.48  | 6.56  | 2.78E-09 | 6.37E-08 | 10.86 |
| ILMN_1744006 | GFOD2    | -0.23 | 7.16  | -6.54 | 2.79E-09 | 6.39E-08 | 10.84 |
| ILMN_1723978 | LGALS1   | 0.77  | 10.17 | 6.54  | 2.80E-09 | 6.40E-08 | 10.84 |
| ILMN_1719498 | EPHX4    | 0.35  | 6.79  | 6.54  | 2.82E-09 | 6.44E-08 | 10.83 |
| ILMN_1866887 | NA       | -0.24 | 8.31  | -6.54 | 2.82E-09 | 6.44E-08 | 10.83 |
| ILMN_2351298 | WIPF1    | 0.52  | 7.24  | 6.54  | 2.85E-09 | 6.52E-08 | 10.82 |
| ILMN_1769702 | GPAA1    | -0.42 | 7.57  | -6.54 | 2.86E-09 | 6.53E-08 | 10.82 |
| ILMN_1807981 | SIGIRR   | -0.36 | 8.16  | -6.53 | 2.87E-09 | 6.54E-08 | 10.82 |
| ILMN_1654861 | ACO2     | -0.40 | 8.68  | -6.53 | 2.89E-09 | 6.59E-08 | 10.81 |
| ILMN_1683992 | OXSM     | -0.20 | 7.14  | -6.53 | 2.89E-09 | 6.59E-08 | 10.81 |
| ILMN_1751425 | ERMP1    | -0.49 | 8.50  | -6.53 | 2.90E-09 | 6.60E-08 | 10.81 |
| ILMN_1697491 | PRR5L    | -0.69 | 8.56  | -6.53 | 2.91E-09 | 6.63E-08 | 10.80 |
| ILMN_1686804 | CDK20    | -0.26 | 7.07  | -6.53 | 2.95E-09 | 6.70E-08 | 10.79 |
| ILMN_1686555 | FYN      | 0.58  | 7.62  | 6.53  | 2.97E-09 | 6.75E-08 | 10.78 |
| ILMN_1849013 | IL6ST    | 0.55  | 9.66  | 6.53  | 2.99E-09 | 6.80E-08 | 10.77 |
| ILMN_2327860 | MAL      | 0.51  | 8.05  | 6.53  | 2.99E-09 | 6.80E-08 | 10.77 |
| ILMN_1802411 | ITGA1    | 0.33  | 6.92  | 6.52  | 3.01E-09 | 6.82E-08 | 10.77 |
| ILMN_1810910 | CFH      | 0.54  | 7.75  | 6.52  | 3.02E-09 | 6.84E-08 | 10.77 |
| ILMN_1746788 | TRIM10   | -0.32 | 7.23  | -6.52 | 3.04E-09 | 6.89E-08 | 10.76 |
| ILMN_2374244 | DYRK2    | -0.48 | 10.47 | -6.52 | 3.07E-09 | 6.94E-08 | 10.75 |
| ILMN_1811921 | CSRP1    | 0.57  | 10.00 | 6.52  | 3.09E-09 | 6.99E-08 | 10.74 |
| ILMN_1667315 | NA       | -0.31 | 7.78  | -6.52 | 3.10E-09 | 7.01E-08 | 10.74 |
| ILMN_2183216 | TDP2     | -0.34 | 6.94  | -6.52 | 3.10E-09 | 7.01E-08 | 10.74 |
| ILMN_1678899 | ERN2     | -0.45 | 7.90  | -6.52 | 3.14E-09 | 7.09E-08 | 10.73 |
| ILMN_1673640 | PAG1     | -0.19 | 6.58  | -6.51 | 3.16E-09 | 7.14E-08 | 10.72 |
| ILMN_1808789 | MYO5C    | -0.39 | 9.68  | -6.51 | 3.17E-09 | 7.14E-08 | 10.72 |
| ILMN_2347068 | MKMK2    | -0.43 | 10.19 | -6.51 | 3.19E-09 | 7.18E-08 | 10.71 |
| ILMN_1720998 | CA12     | -0.91 | 10.47 | -6.51 | 3.21E-09 | 7.23E-08 | 10.70 |
| ILMN_1710408 | LGR4     | -0.41 | 7.54  | -6.51 | 3.22E-09 | 7.24E-08 | 10.70 |
| ILMN_1744059 | DCTN6    | 0.32  | 8.38  | 6.51  | 3.22E-09 | 7.25E-08 | 10.70 |
| ILMN_1688780 | S100A4   | 0.87  | 10.22 | 6.51  | 3.23E-09 | 7.26E-08 | 10.70 |



|              |           |       |       |       |          |          |       |
|--------------|-----------|-------|-------|-------|----------|----------|-------|
| ILMN_2127842 | HBA2      | 1.48  | 9.50  | 6.51  | 3.23E-09 | 7.26E-08 | 10.70 |
| ILMN_3278170 | LOC441455 | -0.39 | 7.08  | -6.51 | 3.23E-09 | 7.26E-08 | 10.70 |
| ILMN_1728199 | POLE      | -0.30 | 7.26  | -6.51 | 3.24E-09 | 7.26E-08 | 10.70 |
| ILMN_1696485 | HNRNPAB   | -0.33 | 8.87  | -6.51 | 3.25E-09 | 7.27E-08 | 10.69 |
| ILMN_1671191 | UQCRC1    | -0.46 | 10.36 | -6.51 | 3.26E-09 | 7.30E-08 | 10.69 |
| ILMN_1669497 | OSBPL10   | 0.33  | 7.79  | 6.50  | 3.33E-09 | 7.46E-08 | 10.67 |
| ILMN_2318638 | TGIF1     | 0.46  | 8.82  | 6.50  | 3.35E-09 | 7.50E-08 | 10.66 |
| ILMN_2348268 | IFFO1     | 0.38  | 8.40  | 6.50  | 3.36E-09 | 7.51E-08 | 10.66 |
| ILMN_1677765 | LRP8      | 0.34  | 6.81  | 6.50  | 3.41E-09 | 7.63E-08 | 10.65 |
| ILMN_1728887 | PAK4      | -0.31 | 7.99  | -6.50 | 3.44E-09 | 7.68E-08 | 10.64 |
| ILMN_1698605 | TMEM43    | 0.37  | 9.07  | 6.50  | 3.44E-09 | 7.68E-08 | 10.64 |
| ILMN_1676611 | PHPT1     | -0.36 | 9.15  | -6.50 | 3.45E-09 | 7.69E-08 | 10.64 |
| ILMN_1712360 | WISP3     | 0.63  | 6.72  | 6.49  | 3.51E-09 | 7.83E-08 | 10.62 |
| ILMN_1695432 | TPST2     | 0.44  | 7.49  | 6.50  | 3.52E-09 | 7.85E-08 | 10.62 |
| ILMN_1683146 | FTH1      | -0.57 | 10.32 | -6.49 | 3.55E-09 | 7.89E-08 | 10.61 |
| ILMN_1844593 | NA        | 0.60  | 7.41  | 6.49  | 3.59E-09 | 7.98E-08 | 10.60 |
| ILMN_2072541 | RAB11FIP2 | 0.29  | 7.90  | 6.49  | 3.59E-09 | 7.98E-08 | 10.60 |
| ILMN_1800078 | LMO2      | 0.45  | 7.39  | 6.49  | 3.61E-09 | 8.03E-08 | 10.59 |
| ILMN_1703969 | PDXDC1    | -0.32 | 7.21  | -6.49 | 3.65E-09 | 8.10E-08 | 10.59 |
| ILMN_2396571 | GPR108    | -0.30 | 7.52  | -6.48 | 3.66E-09 | 8.12E-08 | 10.58 |
| ILMN_1763891 | SSC5D     | 0.37  | 7.09  | 6.48  | 3.70E-09 | 8.20E-08 | 10.57 |
| ILMN_1715662 | CCDC80    | 0.24  | 6.44  | 6.49  | 3.72E-09 | 8.25E-08 | 10.57 |
| ILMN_2231020 | TMEM185B  | 0.28  | 7.48  | 6.48  | 3.72E-09 | 8.25E-08 | 10.56 |
| ILMN_1782788 | YBX3      | 0.39  | 10.96 | 6.48  | 3.73E-09 | 8.26E-08 | 10.56 |
| ILMN_2273911 | ACSL5     | -0.51 | 7.39  | -6.48 | 3.74E-09 | 8.27E-08 | 10.56 |
| ILMN_1753064 | TTC13     | -0.29 | 7.63  | -6.48 | 3.75E-09 | 8.29E-08 | 10.55 |
| ILMN_1657744 | FAM219B   | -0.28 | 8.05  | -6.48 | 3.76E-09 | 8.30E-08 | 10.55 |
| ILMN_1682812 | C21orf33  | -0.36 | 7.64  | -6.48 | 3.76E-09 | 8.30E-08 | 10.55 |
| ILMN_1669281 | CLN3      | -0.40 | 7.86  | -6.48 | 3.77E-09 | 8.30E-08 | 10.55 |
| ILMN_2414826 | VPS13A    | -0.33 | 7.57  | -6.48 | 3.77E-09 | 8.30E-08 | 10.55 |
| ILMN_1729112 | CHPT1     | -0.52 | 9.40  | -6.48 | 3.77E-09 | 8.31E-08 | 10.55 |
| ILMN_1730620 | ARRB1     | -0.29 | 7.51  | -6.48 | 3.77E-09 | 8.31E-08 | 10.55 |
| ILMN_1690844 | DNAJB6    | 0.31  | 10.41 | 6.47  | 3.80E-09 | 8.34E-08 | 10.54 |
| ILMN_1748473 | GIMAP4    | 0.61  | 8.66  | 6.47  | 3.80E-09 | 8.34E-08 | 10.54 |
| ILMN_1757406 | HIST1H1C  | -0.66 | 9.19  | -6.48 | 3.80E-09 | 8.34E-08 | 10.55 |
| ILMN_3239445 | ZBTB42    | -0.29 | 7.81  | -6.47 | 3.80E-09 | 8.34E-08 | 10.54 |
| ILMN_1814998 | POTEKP    | 0.55  | 10.96 | 6.47  | 3.81E-09 | 8.36E-08 | 10.54 |
| ILMN_1707232 | EBF3      | 0.18  | 6.48  | 6.47  | 3.90E-09 | 8.55E-08 | 10.52 |
| ILMN_1694106 | GPD1L     | -0.55 | 10.35 | -6.47 | 3.91E-09 | 8.58E-08 | 10.52 |
| ILMN_1776936 | KANK4     | -0.35 | 6.91  | -6.47 | 3.93E-09 | 8.61E-08 | 10.51 |
| ILMN_1744381 | SERPINE1  | 0.72  | 7.03  | 6.46  | 3.98E-09 | 8.70E-08 | 10.50 |
| ILMN_1707464 | NA        | -1.24 | 8.44  | -6.46 | 3.99E-09 | 8.72E-08 | 10.49 |
| ILMN_1659054 | NA        | -0.25 | 7.55  | -6.46 | 3.99E-09 | 8.72E-08 | 10.49 |
| ILMN_1780671 | PLEKHG3   | -0.32 | 8.28  | -6.46 | 4.02E-09 | 8.79E-08 | 10.49 |
| ILMN_1815115 | CYC1      | -0.37 | 10.40 | -6.46 | 4.04E-09 | 8.82E-08 | 10.48 |
| ILMN_1812824 | SST       | -1.05 | 7.37  | -6.46 | 4.06E-09 | 8.86E-08 | 10.48 |
| ILMN_1710937 | IFI16     | 0.68  | 8.47  | 6.47  | 4.07E-09 | 8.87E-08 | 10.48 |
| ILMN_1728197 | CLDN5     | 0.49  | 7.67  | 6.46  | 4.09E-09 | 8.91E-08 | 10.47 |

|              |           |       |       |       |          |          |       |
|--------------|-----------|-------|-------|-------|----------|----------|-------|
| ILMN_1878029 | NA        | 0.33  | 8.65  | 6.46  | 4.09E-09 | 8.91E-08 | 10.47 |
| ILMN_1775677 | TYSND1    | -0.32 | 8.38  | -6.46 | 4.11E-09 | 8.94E-08 | 10.47 |
| ILMN_1692651 | PHB       | -0.37 | 8.97  | -6.46 | 4.12E-09 | 8.95E-08 | 10.46 |
| ILMN_2374687 | PTPN13    | 0.24  | 6.78  | 6.46  | 4.13E-09 | 8.98E-08 | 10.46 |
| ILMN_1800897 | NRDC      | 0.25  | 9.49  | 6.46  | 4.14E-09 | 9.00E-08 | 10.46 |
| ILMN_1745620 | KRCC1     | -0.38 | 9.39  | -6.45 | 4.20E-09 | 9.11E-08 | 10.44 |
| ILMN_1800787 | RFTN1     | 0.78  | 9.23  | 6.45  | 4.20E-09 | 9.11E-08 | 10.44 |
| ILMN_1678490 | RILPL2    | 0.35  | 7.03  | 6.46  | 4.22E-09 | 9.15E-08 | 10.44 |
| ILMN_2195319 | PDE6A     | -0.27 | 6.66  | -6.45 | 4.24E-09 | 9.19E-08 | 10.43 |
| ILMN_1779279 | MAPK1IP1L | 0.29  | 8.90  | 6.45  | 4.26E-09 | 9.23E-08 | 10.43 |
| ILMN_1784292 | ANKMY2    | -0.30 | 8.20  | -6.45 | 4.28E-09 | 9.25E-08 | 10.43 |
| ILMN_1852151 | NA        | -0.30 | 6.75  | -6.45 | 4.28E-09 | 9.25E-08 | 10.43 |
| ILMN_1770725 | AIF1L     | 0.22  | 6.64  | 6.45  | 4.31E-09 | 9.32E-08 | 10.42 |
| ILMN_1809566 | ZSCAN16   | -0.23 | 7.70  | -6.45 | 4.33E-09 | 9.35E-08 | 10.42 |
| ILMN_1809613 | NGEF      | -0.30 | 7.10  | -6.45 | 4.34E-09 | 9.37E-08 | 10.41 |
| ILMN_1781400 | SLC7A2    | 0.47  | 7.02  | 6.45  | 4.34E-09 | 9.37E-08 | 10.41 |
| ILMN_1684368 | SMIM3     | 0.26  | 6.76  | 6.45  | 4.35E-09 | 9.38E-08 | 10.41 |
| ILMN_1811754 | NDUFB10   | -0.38 | 10.04 | -6.45 | 4.35E-09 | 9.38E-08 | 10.41 |
| ILMN_1811779 | MGC24103  | 0.26  | 7.17  | 6.44  | 4.36E-09 | 9.40E-08 | 10.41 |
| ILMN_1821517 | NA        | -0.40 | 13.15 | -6.44 | 4.37E-09 | 9.40E-08 | 10.41 |
| ILMN_3240222 | SGK223    | -0.45 | 9.09  | -6.44 | 4.43E-09 | 9.52E-08 | 10.39 |
| ILMN_1785732 | TNFAIP6   | 0.71  | 7.00  | 6.44  | 4.44E-09 | 9.55E-08 | 10.39 |
| ILMN_3309739 | MIRLET7D  | -0.26 | 6.84  | -6.44 | 4.52E-09 | 9.71E-08 | 10.37 |
| ILMN_1732151 | COL6A1    | 0.62  | 8.83  | 6.44  | 4.54E-09 | 9.75E-08 | 10.37 |
| ILMN_2410406 | AKAP7     | -0.24 | 6.59  | -6.43 | 4.56E-09 | 9.78E-08 | 10.36 |
| ILMN_1809384 | CYP4F12   | -0.72 | 8.97  | -6.43 | 4.56E-09 | 9.79E-08 | 10.36 |
| ILMN_1733176 | LIMS1     | 0.50  | 8.94  | 6.43  | 4.57E-09 | 9.79E-08 | 10.36 |
| ILMN_2400759 | CPVL      | 0.97  | 8.71  | 6.43  | 4.58E-09 | 9.81E-08 | 10.36 |
| ILMN_2063586 | CLIC4     | 0.51  | 9.63  | 6.43  | 4.60E-09 | 9.84E-08 | 10.36 |
| ILMN_1771026 | GARS      | 0.33  | 9.78  | 6.43  | 4.62E-09 | 9.88E-08 | 10.35 |
| ILMN_1698100 | ANXA2P1   | 0.55  | 7.83  | 6.43  | 4.70E-09 | 1.01E-07 | 10.33 |
| ILMN_1726666 | GPX3      | 0.81  | 8.13  | 6.43  | 4.73E-09 | 1.01E-07 | 10.33 |
| ILMN_3245103 | RNU11     | 0.67  | 6.91  | 6.42  | 4.78E-09 | 1.02E-07 | 10.32 |
| ILMN_1675656 | PPFIBP2   | -0.39 | 9.03  | -6.42 | 4.79E-09 | 1.02E-07 | 10.32 |
| ILMN_1778374 | BSG       | -0.61 | 10.37 | -6.43 | 4.82E-09 | 1.03E-07 | 10.31 |
| ILMN_1729281 | SPHK2     | -0.44 | 8.88  | -6.42 | 4.83E-09 | 1.03E-07 | 10.31 |
| ILMN_1780861 | NA        | -0.30 | 9.78  | -6.42 | 4.83E-09 | 1.03E-07 | 10.31 |
| ILMN_3240144 | NA        | 1.42  | 8.60  | 6.42  | 4.84E-09 | 1.03E-07 | 10.31 |
| ILMN_2059505 | ARPP19    | 0.36  | 8.82  | 6.42  | 4.89E-09 | 1.04E-07 | 10.30 |
| ILMN_1857897 | NA        | -0.36 | 7.43  | -6.42 | 4.89E-09 | 1.04E-07 | 10.30 |
| ILMN_1742677 | HOXB13    | -0.80 | 7.70  | -6.42 | 4.91E-09 | 1.04E-07 | 10.29 |
| ILMN_1718960 | SERPINB8  | 0.37  | 7.07  | 6.42  | 4.92E-09 | 1.05E-07 | 10.29 |
| ILMN_1810782 | SH3KBP1   | -0.36 | 10.07 | -6.42 | 4.95E-09 | 1.05E-07 | 10.28 |
| ILMN_1735779 | KCNJ8     | 0.33  | 6.86  | 6.42  | 4.98E-09 | 1.06E-07 | 10.28 |
| ILMN_2255256 | MARVELD3  | -0.43 | 7.28  | -6.42 | 5.00E-09 | 1.06E-07 | 10.28 |
| ILMN_1660446 | BTNL3     | -0.60 | 7.25  | -6.41 | 5.02E-09 | 1.06E-07 | 10.27 |
| ILMN_1770466 | ATP5G3    | -0.32 | 7.23  | -6.41 | 5.08E-09 | 1.07E-07 | 10.26 |
| ILMN_1763638 | BCAR3     | -0.40 | 8.64  | -6.41 | 5.13E-09 | 1.08E-07 | 10.25 |

|              |            |       |       |       |          |          |       |
|--------------|------------|-------|-------|-------|----------|----------|-------|
| ILMN_2156982 | IMP4       | 0.29  | 9.35  | 6.41  | 5.13E-09 | 1.08E-07 | 10.25 |
| ILMN_1735438 | GPM6B      | 0.36  | 6.77  | 6.41  | 5.15E-09 | 1.09E-07 | 10.25 |
| ILMN_1761762 | NA         | 0.41  | 7.08  | 6.42  | 5.16E-09 | 1.09E-07 | 10.25 |
| ILMN_1766918 | KCNK5      | -0.35 | 7.41  | -6.41 | 5.16E-09 | 1.09E-07 | 10.24 |
| ILMN_1724376 | ERLEC1     | 0.30  | 9.47  | 6.40  | 5.27E-09 | 1.11E-07 | 10.22 |
| ILMN_3191393 | CCDC80     | 0.30  | 6.66  | 6.40  | 5.27E-09 | 1.11E-07 | 10.22 |
| ILMN_1655614 | DSP        | -0.40 | 8.71  | -6.40 | 5.29E-09 | 1.11E-07 | 10.22 |
| ILMN_1702247 | CCNDBP1    | -0.26 | 10.38 | -6.40 | 5.30E-09 | 1.12E-07 | 10.22 |
| ILMN_2067269 | RECK       | 0.34  | 7.40  | 6.40  | 5.30E-09 | 1.12E-07 | 10.22 |
| ILMN_2091310 | ANO1       | 0.60  | 7.79  | 6.40  | 5.31E-09 | 1.12E-07 | 10.22 |
| ILMN_1792672 | POLR2D     | 0.21  | 7.18  | 6.40  | 5.31E-09 | 1.12E-07 | 10.22 |
| ILMN_1678215 | RHOJ       | 0.27  | 7.02  | 6.40  | 5.34E-09 | 1.12E-07 | 10.21 |
| ILMN_2382990 | HK1        | 0.30  | 10.53 | 6.40  | 5.34E-09 | 1.12E-07 | 10.21 |
| ILMN_1738322 | SHROOM1    | -0.30 | 6.69  | -6.39 | 5.49E-09 | 1.15E-07 | 10.18 |
| ILMN_1813350 | HSD11B2    | -0.87 | 9.67  | -6.39 | 5.50E-09 | 1.15E-07 | 10.18 |
| ILMN_1732575 | SEC14L1    | 0.24  | 6.87  | 6.39  | 5.51E-09 | 1.15E-07 | 10.18 |
| ILMN_1737611 | VAMP1      | 0.44  | 7.75  | 6.39  | 5.52E-09 | 1.16E-07 | 10.18 |
| ILMN_1682332 | GYPC       | 0.58  | 7.34  | 6.39  | 5.56E-09 | 1.16E-07 | 10.17 |
| ILMN_1760647 | HOXA3      | -0.53 | 7.26  | -6.39 | 5.57E-09 | 1.16E-07 | 10.17 |
| ILMN_1749792 | SORBS1     | 0.70  | 8.34  | 6.39  | 5.63E-09 | 1.18E-07 | 10.16 |
| ILMN_2386205 | C21orf33   | -0.30 | 7.36  | -6.39 | 5.66E-09 | 1.18E-07 | 10.15 |
| ILMN_3248443 | SNHG6      | 0.47  | 9.58  | 6.39  | 5.69E-09 | 1.19E-07 | 10.15 |
| ILMN_1714083 | KLHL8      | -0.33 | 7.55  | -6.38 | 5.77E-09 | 1.20E-07 | 10.13 |
| ILMN_1723874 | MRPS6      | -0.27 | 10.38 | -6.38 | 5.77E-09 | 1.20E-07 | 10.13 |
| ILMN_2169439 | ITGAV      | 0.43  | 9.28  | 6.38  | 5.78E-09 | 1.20E-07 | 10.13 |
| ILMN_1778951 | C6orf203   | -0.23 | 7.14  | -6.38 | 5.80E-09 | 1.21E-07 | 10.13 |
| ILMN_2079786 | NUAK1      | 0.30  | 7.29  | 6.39  | 5.81E-09 | 1.21E-07 | 10.13 |
| ILMN_1770663 | KRT24      | 0.50  | 6.71  | 6.38  | 5.83E-09 | 1.21E-07 | 10.13 |
| ILMN_1677292 | C5orf30    | -0.55 | 8.39  | -6.38 | 5.85E-09 | 1.22E-07 | 10.12 |
| ILMN_2167426 | ASPHD2     | 0.23  | 6.90  | 6.38  | 5.86E-09 | 1.22E-07 | 10.12 |
| ILMN_2401878 | DUSP10     | 0.24  | 6.72  | 6.38  | 5.88E-09 | 1.22E-07 | 10.12 |
| ILMN_2393544 | PRMT2      | -0.25 | 7.64  | -6.38 | 5.89E-09 | 1.22E-07 | 10.12 |
| ILMN_1784847 | CREBZF     | 0.29  | 7.45  | 6.38  | 5.98E-09 | 1.24E-07 | 10.10 |
| ILMN_1757845 | SPIRE1     | 0.45  | 8.20  | 6.38  | 5.98E-09 | 1.24E-07 | 10.10 |
| ILMN_1712684 | FAM20C     | 0.45  | 7.49  | 6.37  | 6.06E-09 | 1.25E-07 | 10.09 |
| ILMN_1715625 | SLX4IP     | -0.33 | 7.90  | -6.37 | 6.13E-09 | 1.27E-07 | 10.08 |
| ILMN_1773959 | ST6GALNAC! | 0.19  | 6.36  | 6.37  | 6.13E-09 | 1.27E-07 | 10.08 |
| ILMN_1707627 | TPI1       | -0.37 | 10.84 | -6.37 | 6.14E-09 | 1.27E-07 | 10.07 |
| ILMN_1745573 | TTC13      | -0.36 | 8.90  | -6.37 | 6.16E-09 | 1.27E-07 | 10.07 |
| ILMN_1741406 | HOOK1      | -0.54 | 8.85  | -6.37 | 6.19E-09 | 1.28E-07 | 10.07 |
| ILMN_1656902 | HECTD3     | -0.32 | 7.78  | -6.37 | 6.21E-09 | 1.28E-07 | 10.06 |
| ILMN_1666453 | STK3       | 0.34  | 8.28  | 6.37  | 6.22E-09 | 1.28E-07 | 10.06 |
| ILMN_1701514 | TRAF3IP2   | -0.32 | 9.19  | -6.37 | 6.22E-09 | 1.28E-07 | 10.06 |
| ILMN_1727271 | WARS       | 0.67  | 8.53  | 6.37  | 6.24E-09 | 1.29E-07 | 10.06 |
| ILMN_1712545 | S100A3     | 0.23  | 6.46  | 6.37  | 6.26E-09 | 1.29E-07 | 10.06 |
| ILMN_1694548 | ANXA3      | 0.64  | 8.43  | 6.37  | 6.27E-09 | 1.29E-07 | 10.05 |
| ILMN_1731194 | STRAP      | 0.26  | 9.54  | 6.37  | 6.28E-09 | 1.29E-07 | 10.05 |
| ILMN_1778173 | AK3        | -0.34 | 10.10 | -6.37 | 6.29E-09 | 1.29E-07 | 10.05 |

|              |            |       |       |       |          |          |       |
|--------------|------------|-------|-------|-------|----------|----------|-------|
| ILMN_2350634 | EFEMP1     | 0.89  | 8.67  | 6.36  | 6.36E-09 | 1.31E-07 | 10.04 |
| ILMN_1775444 | NA         | -0.25 | 7.51  | -6.36 | 6.38E-09 | 1.31E-07 | 10.04 |
| ILMN_2316918 | PANK1      | -0.67 | 8.53  | -6.37 | 6.39E-09 | 1.31E-07 | 10.04 |
| ILMN_1735495 | TBC1D8     | 0.40  | 7.41  | 6.36  | 6.46E-09 | 1.32E-07 | 10.03 |
| ILMN_1809139 | AHCTF1     | 0.25  | 8.01  | 6.36  | 6.46E-09 | 1.32E-07 | 10.03 |
| ILMN_1691175 | ADH6       | -0.20 | 6.68  | -6.36 | 6.50E-09 | 1.33E-07 | 10.02 |
| ILMN_2092756 | TMEM109    | 0.28  | 8.09  | 6.36  | 6.50E-09 | 1.33E-07 | 10.02 |
| ILMN_2066124 | AFG3L2     | -0.43 | 9.73  | -6.36 | 6.58E-09 | 1.35E-07 | 10.01 |
| ILMN_1718607 | TSPAN4     | 0.37  | 8.20  | 6.35  | 6.65E-09 | 1.36E-07 | 10.00 |
| ILMN_1733930 | PREB       | 0.25  | 7.65  | 6.35  | 6.66E-09 | 1.36E-07 | 10.00 |
| ILMN_3268914 | NA         | 0.49  | 10.27 | 6.36  | 6.72E-09 | 1.37E-07 | 9.99  |
| ILMN_1714522 | CLMN       | -0.25 | 7.04  | -6.35 | 6.79E-09 | 1.39E-07 | 9.98  |
| ILMN_1678652 | TCTN3      | -0.28 | 7.49  | -6.35 | 6.81E-09 | 1.39E-07 | 9.97  |
| ILMN_1712430 | ATP5G1     | -0.60 | 7.84  | -6.35 | 6.83E-09 | 1.39E-07 | 9.98  |
| ILMN_1674560 | GBA2       | -0.31 | 7.93  | -6.34 | 6.91E-09 | 1.41E-07 | 9.96  |
| ILMN_1768534 | BHLHE40    | 0.76  | 9.78  | 6.34  | 6.93E-09 | 1.41E-07 | 9.96  |
| ILMN_1701052 | TUBG2      | 0.23  | 6.97  | 6.34  | 6.98E-09 | 1.42E-07 | 9.95  |
| ILMN_1695316 | SLC39A8    | -0.51 | 8.67  | -6.34 | 7.04E-09 | 1.43E-07 | 9.94  |
| ILMN_1800739 | SPINT2     | -0.53 | 11.52 | -6.34 | 7.05E-09 | 1.43E-07 | 9.94  |
| ILMN_1757644 | UBE2H      | 0.26  | 7.91  | 6.34  | 7.05E-09 | 1.43E-07 | 9.94  |
| ILMN_3241758 | POTEF      | 0.41  | 12.39 | 6.34  | 7.05E-09 | 1.43E-07 | 9.94  |
| ILMN_1735367 | HSD17B11   | -0.56 | 10.38 | -6.34 | 7.06E-09 | 1.43E-07 | 9.94  |
| ILMN_2380801 | FYN        | 0.33  | 6.97  | 6.34  | 7.08E-09 | 1.43E-07 | 9.94  |
| ILMN_1765574 | TFAP2A     | 0.63  | 6.92  | 6.34  | 7.08E-09 | 1.43E-07 | 9.94  |
| ILMN_1791912 | SIDT2      | -0.42 | 9.88  | -6.60 | 7.11E-09 | 1.44E-07 | 10.10 |
| ILMN_3226181 | NUDT7      | -0.41 | 8.15  | -6.34 | 7.13E-09 | 1.44E-07 | 9.93  |
| ILMN_1845086 | NA         | 0.30  | 8.05  | 6.34  | 7.14E-09 | 1.44E-07 | 9.93  |
| ILMN_1718972 | MFSD3      | -0.46 | 8.45  | -6.34 | 7.18E-09 | 1.45E-07 | 9.92  |
| ILMN_1814686 | BCO1       | -0.47 | 7.40  | -6.34 | 7.22E-09 | 1.46E-07 | 9.92  |
| ILMN_1664750 | TMBIM4     | -0.24 | 11.28 | -6.33 | 7.24E-09 | 1.46E-07 | 9.91  |
| ILMN_3250067 | ANGPT2     | 0.24  | 6.84  | 6.33  | 7.23E-09 | 1.46E-07 | 9.92  |
| ILMN_1698225 | MYO5A      | 0.30  | 6.79  | 6.33  | 7.31E-09 | 1.47E-07 | 9.91  |
| ILMN_2399893 | RPS24      | 0.34  | 7.91  | 6.33  | 7.30E-09 | 1.47E-07 | 9.91  |
| ILMN_1790985 | CSGALNACT: | 0.34  | 7.07  | 6.33  | 7.37E-09 | 1.48E-07 | 9.90  |
| ILMN_1733579 | EVI2A      | 0.52  | 7.48  | 6.33  | 7.45E-09 | 1.50E-07 | 9.89  |
| ILMN_2402341 | MAPK3      | -0.40 | 9.33  | -6.33 | 7.46E-09 | 1.50E-07 | 9.89  |
| ILMN_1767111 | ANO10      | -0.30 | 7.40  | -6.33 | 7.47E-09 | 1.50E-07 | 9.88  |
| ILMN_2117323 | PIK3C2B    | -0.34 | 8.56  | -6.33 | 7.51E-09 | 1.51E-07 | 9.88  |
| ILMN_1706434 | YBX3P1     | 0.44  | 8.52  | 6.33  | 7.56E-09 | 1.52E-07 | 9.87  |
| ILMN_1693338 | CYP1B1     | 0.60  | 6.93  | 6.32  | 7.63E-09 | 1.53E-07 | 9.86  |
| ILMN_2151281 | GABARAPL1  | 0.42  | 8.24  | 6.32  | 7.65E-09 | 1.53E-07 | 9.86  |
| ILMN_1678579 | CPT2       | -0.48 | 9.06  | -6.32 | 7.66E-09 | 1.54E-07 | 9.86  |
| ILMN_1795338 | YPEL1      | -0.28 | 7.47  | -6.33 | 7.75E-09 | 1.55E-07 | 9.85  |
| ILMN_1755405 | PGAP2      | -0.29 | 8.47  | -6.32 | 7.77E-09 | 1.56E-07 | 9.85  |
| ILMN_3247821 | TMEM206    | 0.26  | 6.93  | 6.32  | 7.77E-09 | 1.56E-07 | 9.85  |
| ILMN_2214910 | EPHB4      | 0.28  | 7.53  | 6.32  | 7.84E-09 | 1.57E-07 | 9.84  |
| ILMN_1709043 | PLGRKT     | -0.36 | 9.67  | -6.32 | 7.87E-09 | 1.57E-07 | 9.83  |
| ILMN_1752478 | DHRS3      | -0.40 | 8.78  | -6.32 | 7.87E-09 | 1.57E-07 | 9.84  |

|              |            |       |       |       |          |          |      |
|--------------|------------|-------|-------|-------|----------|----------|------|
| ILMN_2124352 | DCUN1D5    | 0.27  | 7.50  | 6.32  | 7.88E-09 | 1.57E-07 | 9.83 |
| ILMN_1781374 | TUFT1      | -0.42 | 8.71  | -6.32 | 7.90E-09 | 1.58E-07 | 9.83 |
| ILMN_3235171 | CCDC64B    | -0.39 | 7.22  | -6.32 | 7.93E-09 | 1.58E-07 | 9.83 |
| ILMN_1670383 | PCDH7      | 0.23  | 6.56  | 6.31  | 7.96E-09 | 1.59E-07 | 9.82 |
| ILMN_1687583 | CAV1       | 0.36  | 7.05  | 6.31  | 7.97E-09 | 1.59E-07 | 9.82 |
| ILMN_1778734 | FAN1       | -0.33 | 8.89  | -6.31 | 8.03E-09 | 1.60E-07 | 9.81 |
| ILMN_2407346 | LDHD       | -0.60 | 7.40  | -6.31 | 8.04E-09 | 1.60E-07 | 9.81 |
| ILMN_1738491 | SNX30      | -0.44 | 7.99  | -6.32 | 8.06E-09 | 1.60E-07 | 9.81 |
| ILMN_1805643 | RILPL1     | 0.29  | 7.34  | 6.31  | 8.06E-09 | 1.60E-07 | 9.81 |
| ILMN_2382505 | SLC22A18   | -0.58 | 9.17  | -6.31 | 8.19E-09 | 1.63E-07 | 9.80 |
| ILMN_1805543 | ADAMTS9    | 0.57  | 7.12  | 6.31  | 8.21E-09 | 1.63E-07 | 9.79 |
| ILMN_1697510 | ACSS2      | -0.23 | 6.81  | -6.31 | 8.22E-09 | 1.63E-07 | 9.79 |
| ILMN_3284429 | NA         | -0.35 | 7.66  | -6.31 | 8.24E-09 | 1.63E-07 | 9.79 |
| ILMN_1724832 | OVOL2      | -0.50 | 8.56  | -6.30 | 8.36E-09 | 1.66E-07 | 9.77 |
| ILMN_2319326 | ADARB1     | 0.23  | 6.79  | 6.31  | 8.47E-09 | 1.68E-07 | 9.77 |
| ILMN_1800721 | VPS13A     | -0.23 | 7.14  | -6.30 | 8.59E-09 | 1.70E-07 | 9.75 |
| ILMN_1724533 | LY96       | 0.80  | 8.48  | 6.30  | 8.62E-09 | 1.70E-07 | 9.75 |
| ILMN_1741253 | UBR5       | 0.24  | 7.82  | 6.30  | 8.67E-09 | 1.71E-07 | 9.74 |
| ILMN_1724789 | CD59       | 0.53  | 7.91  | 6.29  | 8.73E-09 | 1.73E-07 | 9.73 |
| ILMN_1698554 | AACS       | -0.21 | 7.10  | -6.29 | 8.81E-09 | 1.74E-07 | 9.72 |
| ILMN_2336130 | NA         | -0.46 | 8.71  | -6.29 | 8.82E-09 | 1.74E-07 | 9.72 |
| ILMN_2392189 | CTDSPL     | -0.42 | 9.00  | -6.29 | 8.85E-09 | 1.74E-07 | 9.72 |
| ILMN_1815937 | TMEM184A   | -0.37 | 6.86  | -6.29 | 8.86E-09 | 1.75E-07 | 9.72 |
| ILMN_1769245 | GLIPR1     | 0.46  | 7.11  | 6.29  | 8.89E-09 | 1.75E-07 | 9.71 |
| ILMN_1698323 | PLEKHB2    | -0.45 | 8.03  | -6.29 | 8.91E-09 | 1.75E-07 | 9.71 |
| ILMN_1709634 | CMBL       | -0.61 | 10.20 | -6.29 | 8.95E-09 | 1.76E-07 | 9.71 |
| ILMN_2401873 | DUSP10     | 0.24  | 6.84  | 6.29  | 8.99E-09 | 1.77E-07 | 9.70 |
| ILMN_3231638 | FAM160B1   | 0.32  | 8.83  | 6.29  | 9.01E-09 | 1.77E-07 | 9.70 |
| ILMN_1769520 | UBE2L6     | 0.65  | 9.55  | 6.29  | 9.05E-09 | 1.78E-07 | 9.70 |
| ILMN_2145670 | TNC        | 0.61  | 8.26  | 6.29  | 9.06E-09 | 1.78E-07 | 9.70 |
| ILMN_1785852 | NABP1      | 0.53  | 8.74  | 6.28  | 9.18E-09 | 1.80E-07 | 9.68 |
| ILMN_1706959 | TIMM22     | -0.28 | 8.16  | -6.28 | 9.23E-09 | 1.81E-07 | 9.68 |
| ILMN_1815619 | CDX1       | -0.62 | 10.42 | -6.28 | 9.25E-09 | 1.81E-07 | 9.68 |
| ILMN_1663575 | NA         | 0.39  | 8.20  | 6.28  | 9.30E-09 | 1.82E-07 | 9.67 |
| ILMN_1768097 | RPGR       | 0.23  | 7.31  | 6.28  | 9.30E-09 | 1.82E-07 | 9.67 |
| ILMN_1702835 | SH3BGRL    | 0.45  | 9.68  | 6.28  | 9.35E-09 | 1.83E-07 | 9.67 |
| ILMN_2410516 | PPM1A      | -0.33 | 7.43  | -6.28 | 9.38E-09 | 1.83E-07 | 9.66 |
| ILMN_2402600 | GLIS3      | 0.45  | 7.35  | 6.28  | 9.43E-09 | 1.84E-07 | 9.66 |
| ILMN_3236694 | LOC1001339 | 0.17  | 6.65  | 6.28  | 9.43E-09 | 1.84E-07 | 9.66 |
| ILMN_2096116 | HSP90B1    | 0.34  | 11.49 | 6.28  | 9.44E-09 | 1.84E-07 | 9.66 |
| ILMN_1728049 | S100A16    | 0.58  | 9.17  | 6.27  | 9.56E-09 | 1.86E-07 | 9.64 |
| ILMN_1735151 | EIF5A2     | 0.21  | 6.90  | 6.27  | 9.56E-09 | 1.86E-07 | 9.64 |
| ILMN_1781623 | TEX264     | -0.28 | 7.67  | -6.27 | 9.56E-09 | 1.86E-07 | 9.64 |
| ILMN_1676393 | ATP5G1     | -0.46 | 10.06 | -6.27 | 9.59E-09 | 1.87E-07 | 9.64 |
| ILMN_1714523 | HEPH       | -0.41 | 9.38  | -6.27 | 9.71E-09 | 1.89E-07 | 9.63 |
| ILMN_1788394 | TTLL6      | -0.45 | 7.30  | -6.27 | 9.74E-09 | 1.90E-07 | 9.63 |
| ILMN_2158003 | KIAA1683   | -0.38 | 7.11  | -6.27 | 9.81E-09 | 1.91E-07 | 9.62 |
| ILMN_1788192 | ARMCX1     | 0.31  | 7.30  | 6.27  | 9.83E-09 | 1.91E-07 | 9.62 |

|              |         |       |       |       |          |          |      |
|--------------|---------|-------|-------|-------|----------|----------|------|
| ILMN_1718907 | TSHZ1   | -0.26 | 7.82  | -6.27 | 9.95E-09 | 1.93E-07 | 9.61 |
| ILMN_1725510 | DHCR24  | -0.52 | 8.44  | -6.27 | 9.97E-09 | 1.93E-07 | 9.60 |
| ILMN_1764769 | VWA5A   | -0.44 | 8.68  | -6.27 | 9.97E-09 | 1.93E-07 | 9.60 |
| ILMN_2366041 | ITM2C   | -0.67 | 12.32 | -6.27 | 9.96E-09 | 1.93E-07 | 9.60 |
| ILMN_1664167 | RPF2    | 0.35  | 8.92  | 6.26  | 1.01E-08 | 1.95E-07 | 9.60 |
| ILMN_1672717 | TMEM254 | -0.33 | 8.25  | -6.26 | 1.01E-08 | 1.95E-07 | 9.60 |
| ILMN_1693311 | TMBIM6  | -0.31 | 12.06 | -6.26 | 1.00E-08 | 1.95E-07 | 9.60 |
| ILMN_1774207 | ANGPT2  | 0.23  | 6.58  | 6.26  | 1.00E-08 | 1.95E-07 | 9.60 |
| ILMN_2396546 | IGSF3   | -0.35 | 7.11  | -6.26 | 1.01E-08 | 1.95E-07 | 9.59 |
| ILMN_1759787 | THBD    | 0.28  | 6.61  | 6.26  | 1.01E-08 | 1.95E-07 | 9.59 |
| ILMN_2059886 | TTC38   | -0.52 | 9.10  | -6.26 | 1.03E-08 | 1.99E-07 | 9.57 |
| ILMN_1667430 | DEGS1   | 0.42  | 7.64  | 6.26  | 1.03E-08 | 2.00E-07 | 9.57 |
| ILMN_1705464 | MRPL41  | -0.46 | 9.14  | -6.26 | 1.04E-08 | 2.01E-07 | 9.56 |
| ILMN_1756402 | TMEM177 | -0.28 | 7.48  | -6.26 | 1.04E-08 | 2.01E-07 | 9.56 |
| ILMN_1671149 | MEG3    | 0.24  | 6.88  | 6.25  | 1.05E-08 | 2.01E-07 | 9.56 |
| ILMN_1783709 | RRAGA   | 0.18  | 9.94  | 6.25  | 1.05E-08 | 2.01E-07 | 9.56 |
| ILMN_1709674 | GFPT2   | 0.38  | 6.59  | 6.25  | 1.05E-08 | 2.02E-07 | 9.55 |
| ILMN_2374683 | PTPN13  | 0.23  | 6.58  | 6.25  | 1.05E-08 | 2.02E-07 | 9.55 |
| ILMN_1704195 | FUK     | -0.30 | 8.14  | -6.25 | 1.06E-08 | 2.03E-07 | 9.55 |
| ILMN_1744614 | PLEKHG6 | -0.49 | 7.72  | -6.25 | 1.06E-08 | 2.03E-07 | 9.55 |
| ILMN_1800425 | SLC9A1  | -0.44 | 9.90  | -6.25 | 1.06E-08 | 2.03E-07 | 9.55 |
| ILMN_1803018 | KIFC2   | -0.45 | 8.12  | -6.25 | 1.06E-08 | 2.04E-07 | 9.54 |
| ILMN_2341548 | MYO5B   | -0.47 | 8.50  | -6.25 | 1.07E-08 | 2.06E-07 | 9.53 |
| ILMN_2078334 | CNOT10  | -0.18 | 7.22  | -6.25 | 1.08E-08 | 2.06E-07 | 9.54 |
| ILMN_1664012 | CANT1   | -0.42 | 9.76  | -6.25 | 1.08E-08 | 2.06E-07 | 9.53 |
| ILMN_1803277 | MVP     | -0.51 | 9.77  | -6.25 | 1.08E-08 | 2.06E-07 | 9.53 |
| ILMN_2121816 | GPR137B | 0.38  | 7.56  | 6.25  | 1.08E-08 | 2.06E-07 | 9.53 |
| ILMN_1661500 | B4GALT4 | -0.34 | 8.78  | -6.25 | 1.08E-08 | 2.07E-07 | 9.53 |
| ILMN_2339377 | DNM2    | -0.34 | 7.55  | -6.24 | 1.11E-08 | 2.12E-07 | 9.50 |
| ILMN_2108357 | RPL39L  | 0.34  | 7.42  | 6.24  | 1.12E-08 | 2.13E-07 | 9.49 |
| ILMN_1768784 | PSMC2   | 0.31  | 9.74  | 6.24  | 1.13E-08 | 2.15E-07 | 9.48 |
| ILMN_1674719 | NID1    | 0.24  | 6.79  | 6.24  | 1.14E-08 | 2.17E-07 | 9.48 |
| ILMN_2328986 | SREBF1  | -0.22 | 6.92  | -6.24 | 1.14E-08 | 2.17E-07 | 9.47 |
| ILMN_1740717 | ADH1C   | -1.45 | 9.94  | -6.24 | 1.14E-08 | 2.18E-07 | 9.47 |
| ILMN_1711087 | NA      | -0.46 | 8.15  | -6.23 | 1.15E-08 | 2.20E-07 | 9.46 |
| ILMN_1823533 | NA      | -0.18 | 6.90  | -6.23 | 1.15E-08 | 2.20E-07 | 9.46 |
| ILMN_2189406 | ARPIN   | -0.27 | 7.12  | -6.23 | 1.16E-08 | 2.21E-07 | 9.45 |
| ILMN_1915188 | MID2    | 0.29  | 7.11  | 6.23  | 1.17E-08 | 2.22E-07 | 9.45 |
| ILMN_1738346 | MICU2   | -0.21 | 9.44  | -6.23 | 1.17E-08 | 2.22E-07 | 9.45 |
| ILMN_1692664 | PRR5    | -0.27 | 7.48  | -6.24 | 1.17E-08 | 2.23E-07 | 9.45 |
| ILMN_1651429 | SELM    | 0.51  | 8.26  | 6.23  | 1.17E-08 | 2.23E-07 | 9.44 |
| ILMN_1752351 | LAMP2   | 0.42  | 8.75  | 6.23  | 1.18E-08 | 2.23E-07 | 9.44 |
| ILMN_1766650 | FOXA1   | -0.50 | 9.05  | -6.23 | 1.18E-08 | 2.23E-07 | 9.44 |
| ILMN_1688775 | NA      | -0.30 | 8.90  | -6.23 | 1.19E-08 | 2.26E-07 | 9.43 |
| ILMN_1702124 | LNX2    | -0.33 | 8.09  | -6.23 | 1.19E-08 | 2.26E-07 | 9.43 |
| ILMN_3237961 | ANO1    | 0.46  | 7.33  | 6.23  | 1.20E-08 | 2.26E-07 | 9.43 |
| ILMN_2381899 | OPTN    | -0.37 | 8.98  | -6.22 | 1.20E-08 | 2.27E-07 | 9.42 |
| ILMN_1679176 | CLCA4   | -1.52 | 11.20 | -6.22 | 1.21E-08 | 2.28E-07 | 9.42 |

|              |         |       |       |       |          |          |      |
|--------------|---------|-------|-------|-------|----------|----------|------|
| ILMN_1715789 | DOCK1   | -0.33 | 7.64  | -6.22 | 1.21E-08 | 2.29E-07 | 9.42 |
| ILMN_1717990 | CALD1   | 0.57  | 7.83  | 6.22  | 1.21E-08 | 2.29E-07 | 9.41 |
| ILMN_3259146 | BST2    | 0.47  | 7.67  | 6.23  | 1.22E-08 | 2.30E-07 | 9.41 |
| ILMN_1728218 | RBPM5   | 0.25  | 6.70  | 6.22  | 1.23E-08 | 2.32E-07 | 9.40 |
| ILMN_1697268 | EMILIN2 | 0.32  | 7.91  | 6.22  | 1.24E-08 | 2.33E-07 | 9.40 |
| ILMN_1724700 | RIOK3   | -0.37 | 10.65 | -6.22 | 1.25E-08 | 2.35E-07 | 9.39 |
| ILMN_1688639 | FBXL2   | 0.19  | 6.66  | 6.22  | 1.25E-08 | 2.36E-07 | 9.38 |
| ILMN_1789913 | SMPDL3B | -0.22 | 6.80  | -6.22 | 1.25E-08 | 2.36E-07 | 9.38 |
| ILMN_2111932 | SERINC2 | -0.48 | 8.48  | -6.22 | 1.25E-08 | 2.36E-07 | 9.38 |
| ILMN_1651354 | SPP1    | 0.55  | 7.03  | 6.21  | 1.28E-08 | 2.40E-07 | 9.36 |
| ILMN_1657864 | TMUB2   | -0.22 | 7.61  | -6.21 | 1.28E-08 | 2.41E-07 | 9.36 |
| ILMN_1689953 | CD81    | 0.41  | 12.12 | 6.21  | 1.28E-08 | 2.41E-07 | 9.36 |
| ILMN_2328378 | OSBPL3  | 0.32  | 7.22  | 6.21  | 1.28E-08 | 2.41E-07 | 9.36 |
| ILMN_1707727 | ANGPTL4 | 0.68  | 7.39  | 6.21  | 1.30E-08 | 2.44E-07 | 9.35 |
| ILMN_1751362 | FASTKD1 | -0.39 | 8.36  | -6.21 | 1.30E-08 | 2.44E-07 | 9.35 |
| ILMN_1708130 | EHF     | -0.63 | 8.92  | -6.21 | 1.30E-08 | 2.44E-07 | 9.35 |
| ILMN_1769259 | ANO9    | -0.50 | 7.87  | -6.20 | 1.32E-08 | 2.48E-07 | 9.33 |
| ILMN_1772981 | EPN1    | -0.31 | 10.89 | -6.20 | 1.32E-08 | 2.48E-07 | 9.33 |
| ILMN_2390853 | CTSH    | 0.72  | 9.58  | 6.20  | 1.33E-08 | 2.50E-07 | 9.32 |
| ILMN_1787897 | CXCL1   | 0.96  | 7.73  | 6.20  | 1.34E-08 | 2.50E-07 | 9.32 |
| ILMN_1767523 | IL17RB  | -0.50 | 7.88  | -6.20 | 1.34E-08 | 2.51E-07 | 9.31 |
| ILMN_1734198 | RNGTT   | 0.32  | 8.41  | 6.20  | 1.35E-08 | 2.52E-07 | 9.31 |
| ILMN_2054297 | PTGS2   | 1.10  | 7.99  | 6.20  | 1.35E-08 | 2.52E-07 | 9.31 |
| ILMN_3193306 | TMEM251 | -0.28 | 8.75  | -6.20 | 1.36E-08 | 2.55E-07 | 9.30 |
| ILMN_1713301 | DGCR2   | -0.30 | 7.94  | -6.20 | 1.37E-08 | 2.56E-07 | 9.29 |
| ILMN_1700310 | NA      | -0.62 | 8.55  | -6.19 | 1.38E-08 | 2.57E-07 | 9.29 |
| ILMN_2368530 | IL32    | -0.53 | 8.86  | -6.19 | 1.39E-08 | 2.58E-07 | 9.28 |
| ILMN_1705064 | NDEL1   | 0.32  | 9.97  | 6.19  | 1.39E-08 | 2.58E-07 | 9.28 |
| ILMN_1813400 | CBR4    | -0.28 | 7.98  | -6.19 | 1.39E-08 | 2.60E-07 | 9.28 |
| ILMN_2116877 | OLFM4   | 1.57  | 11.84 | 6.20  | 1.40E-08 | 2.61E-07 | 9.28 |
| ILMN_1797367 | TSC1    | -0.24 | 7.54  | -6.19 | 1.40E-08 | 2.61E-07 | 9.27 |
| ILMN_1802105 | STYK1   | -0.29 | 7.09  | -6.19 | 1.41E-08 | 2.62E-07 | 9.27 |
| ILMN_2152131 | ACTB    | 0.30  | 13.39 | 6.19  | 1.41E-08 | 2.62E-07 | 9.27 |
| ILMN_1715760 | LGALS9  | -0.25 | 7.04  | -6.19 | 1.41E-08 | 2.62E-07 | 9.27 |
| ILMN_2352295 | PRDM10  | -0.22 | 7.09  | -6.19 | 1.42E-08 | 2.63E-07 | 9.26 |
| ILMN_1768101 | HOXB6   | -0.23 | 6.91  | -6.19 | 1.42E-08 | 2.64E-07 | 9.26 |
| ILMN_2232430 | NMD3    | 0.30  | 8.23  | 6.19  | 1.42E-08 | 2.64E-07 | 9.26 |
| ILMN_1681780 | MKX     | 0.27  | 6.62  | 6.19  | 1.42E-08 | 2.64E-07 | 9.26 |
| ILMN_1669617 | GRB10   | 0.28  | 7.28  | 6.19  | 1.43E-08 | 2.65E-07 | 9.25 |
| ILMN_1696276 | ZNF653  | -0.18 | 7.24  | -6.18 | 1.44E-08 | 2.67E-07 | 9.25 |
| ILMN_1655930 | ELL2    | 0.48  | 7.51  | 6.18  | 1.44E-08 | 2.67E-07 | 9.24 |
| ILMN_1798679 | ANO9    | -0.46 | 7.44  | -6.18 | 1.45E-08 | 2.68E-07 | 9.24 |
| ILMN_1678454 | CASP4   | 0.47  | 8.55  | 6.19  | 1.46E-08 | 2.69E-07 | 9.24 |
| ILMN_1704290 | SPTLC2  | -0.23 | 7.29  | -6.18 | 1.46E-08 | 2.69E-07 | 9.24 |
| ILMN_1743367 | FZD4    | 0.29  | 7.54  | 6.18  | 1.46E-08 | 2.69E-07 | 9.24 |
| ILMN_1798256 | UPP1    | 0.53  | 8.86  | 6.18  | 1.47E-08 | 2.72E-07 | 9.22 |
| ILMN_2107068 | HOXA2   | -0.27 | 6.87  | -6.18 | 1.48E-08 | 2.72E-07 | 9.23 |
| ILMN_1693293 | NA      | -0.42 | 7.65  | -6.18 | 1.48E-08 | 2.73E-07 | 9.22 |

|              |          |       |       |       |          |          |      |
|--------------|----------|-------|-------|-------|----------|----------|------|
| ILMN_2110167 | POLR1E   | 0.35  | 7.90  | 6.18  | 1.48E-08 | 2.73E-07 | 9.22 |
| ILMN_1809850 | RCN3     | -0.34 | 7.24  | -6.19 | 1.49E-08 | 2.75E-07 | 9.22 |
| ILMN_3237946 | PXDN     | 0.51  | 9.60  | 6.18  | 1.50E-08 | 2.75E-07 | 9.21 |
| ILMN_1673363 | ADGRE5   | 0.37  | 10.25 | 6.18  | 1.50E-08 | 2.75E-07 | 9.21 |
| ILMN_2049766 | NFE2L3   | 0.47  | 8.07  | 6.18  | 1.50E-08 | 2.76E-07 | 9.21 |
| ILMN_1680353 | NSF      | -0.19 | 10.28 | -6.17 | 1.51E-08 | 2.77E-07 | 9.20 |
| ILMN_1783497 | PANK1    | -0.37 | 7.12  | -6.17 | 1.54E-08 | 2.84E-07 | 9.18 |
| ILMN_1658926 | NOTCH3   | 0.37  | 7.22  | 6.17  | 1.55E-08 | 2.85E-07 | 9.17 |
| ILMN_1737394 | LMNA     | 0.56  | 8.55  | 6.17  | 1.56E-08 | 2.86E-07 | 9.17 |
| ILMN_1693452 | GAL3ST4  | -0.42 | 7.45  | -6.17 | 1.56E-08 | 2.87E-07 | 9.17 |
| ILMN_1738971 | USP54    | -0.24 | 6.89  | -6.17 | 1.57E-08 | 2.88E-07 | 9.16 |
| ILMN_1703412 | LATS2    | 0.21  | 6.63  | 6.17  | 1.57E-08 | 2.88E-07 | 9.17 |
| ILMN_1792951 | ZHX2     | 0.29  | 7.13  | 6.16  | 1.57E-08 | 2.88E-07 | 9.16 |
| ILMN_2142979 | PTBP2    | 0.31  | 7.59  | 6.16  | 1.59E-08 | 2.91E-07 | 9.15 |
| ILMN_1723969 | PLCB1    | 0.32  | 6.87  | 6.16  | 1.62E-08 | 2.96E-07 | 9.13 |
| ILMN_1745699 | METTL2A  | -0.21 | 6.85  | -6.16 | 1.64E-08 | 3.01E-07 | 9.12 |
| ILMN_1731529 | MS4A12   | -1.69 | 10.16 | -6.15 | 1.65E-08 | 3.02E-07 | 9.11 |
| ILMN_1720241 | TRIP12   | 0.31  | 8.91  | 6.16  | 1.67E-08 | 3.05E-07 | 9.11 |
| ILMN_2187727 | NOC3L    | 0.36  | 7.83  | 6.16  | 1.68E-08 | 3.06E-07 | 9.10 |
| ILMN_2062701 | GAS1     | 0.25  | 6.67  | 6.15  | 1.68E-08 | 3.06E-07 | 9.10 |
| ILMN_1681886 | ADAMTS5  | 0.25  | 6.53  | 6.15  | 1.69E-08 | 3.09E-07 | 9.09 |
| ILMN_1793615 | ME3      | -0.36 | 7.50  | -6.15 | 1.70E-08 | 3.10E-07 | 9.08 |
| ILMN_1740620 | NA       | -0.17 | 6.89  | -6.15 | 1.72E-08 | 3.13E-07 | 9.08 |
| ILMN_1651347 | SERTAD2  | 0.34  | 9.26  | 6.15  | 1.72E-08 | 3.13E-07 | 9.07 |
| ILMN_1752668 | DAAM2    | 0.33  | 7.04  | 6.14  | 1.73E-08 | 3.15E-07 | 9.07 |
| ILMN_1669966 | NDUFS7   | -0.31 | 9.42  | -6.14 | 1.74E-08 | 3.16E-07 | 9.06 |
| ILMN_1714602 | CD86     | 0.55  | 7.53  | 6.14  | 1.75E-08 | 3.17E-07 | 9.06 |
| ILMN_1695959 | EVA1C    | 0.24  | 7.18  | 6.14  | 1.75E-08 | 3.18E-07 | 9.06 |
| ILMN_1727532 | OLFML3   | 0.34  | 7.33  | 6.14  | 1.76E-08 | 3.19E-07 | 9.05 |
| ILMN_1781001 | SOCS3    | 0.58  | 6.95  | 6.14  | 1.76E-08 | 3.19E-07 | 9.05 |
| ILMN_2211122 | TRAPPC2B | 0.22  | 6.81  | 6.14  | 1.77E-08 | 3.21E-07 | 9.05 |
| ILMN_1672006 | SSB      | 0.27  | 9.00  | 6.14  | 1.77E-08 | 3.21E-07 | 9.04 |
| ILMN_2086077 | JUNB     | 0.51  | 7.41  | 6.14  | 1.78E-08 | 3.23E-07 | 9.04 |
| ILMN_1802441 | REG1A    | 1.85  | 7.90  | 6.14  | 1.78E-08 | 3.23E-07 | 9.04 |
| ILMN_2396991 | HCST     | 0.27  | 6.68  | 6.14  | 1.79E-08 | 3.24E-07 | 9.04 |
| ILMN_2377496 | ERCC1    | 0.25  | 7.89  | 6.14  | 1.79E-08 | 3.24E-07 | 9.03 |
| ILMN_1701621 | SCO2     | -0.33 | 8.44  | -6.14 | 1.80E-08 | 3.26E-07 | 9.03 |
| ILMN_1692861 | UGT2A3   | -0.98 | 8.00  | -6.13 | 1.81E-08 | 3.28E-07 | 9.02 |
| ILMN_1816342 | MTRNR2L1 | -0.76 | 9.34  | -6.13 | 1.82E-08 | 3.28E-07 | 9.02 |
| ILMN_1800008 | ACAT1    | -0.62 | 10.06 | -6.13 | 1.84E-08 | 3.32E-07 | 9.01 |
| ILMN_1781752 | CLEC16A  | -0.23 | 8.53  | -6.13 | 1.88E-08 | 3.39E-07 | 8.99 |
| ILMN_1821473 | NA       | -0.24 | 6.78  | -6.12 | 1.90E-08 | 3.42E-07 | 8.98 |
| ILMN_1775587 | STX19    | -0.58 | 9.45  | -6.12 | 1.90E-08 | 3.42E-07 | 8.98 |
| ILMN_1808487 | PLA2G12B | -0.39 | 6.98  | -6.12 | 1.90E-08 | 3.43E-07 | 8.98 |
| ILMN_1708025 | RBPMS    | 0.39  | 6.91  | 6.13  | 1.91E-08 | 3.43E-07 | 8.98 |
| ILMN_2081087 | HSPA12A  | 0.46  | 7.54  | 6.13  | 1.91E-08 | 3.44E-07 | 8.98 |
| ILMN_2330787 | FRMD6    | 0.36  | 7.17  | 6.12  | 1.92E-08 | 3.45E-07 | 8.97 |
| ILMN_1730201 | DTNA     | 0.30  | 6.77  | 6.12  | 1.92E-08 | 3.46E-07 | 8.97 |



|              |         |       |       |       |          |          |      |
|--------------|---------|-------|-------|-------|----------|----------|------|
| ILMN_1718712 | FAM217B | -0.30 | 7.56  | -6.12 | 1.93E-08 | 3.46E-07 | 8.96 |
| ILMN_2411915 | ATG4B   | -0.33 | 7.73  | -6.12 | 1.93E-08 | 3.46E-07 | 8.96 |
| ILMN_1660277 | NA      | -0.36 | 7.55  | -6.12 | 1.94E-08 | 3.47E-07 | 8.96 |
| ILMN_1674402 | TMEM71  | 0.31  | 6.86  | 6.12  | 1.94E-08 | 3.48E-07 | 8.96 |
| ILMN_1721762 | IL18RAP | 0.42  | 7.14  | 6.12  | 1.94E-08 | 3.48E-07 | 8.96 |
| ILMN_1785618 | SMTN    | 0.45  | 7.67  | 6.12  | 1.95E-08 | 3.50E-07 | 8.95 |
| ILMN_1699545 | PCSK7   | -0.34 | 9.03  | -6.12 | 1.96E-08 | 3.51E-07 | 8.95 |
| ILMN_1661264 | SHMT2   | 0.35  | 9.09  | 6.12  | 1.97E-08 | 3.53E-07 | 8.94 |
| ILMN_1730491 | FMNL2   | 0.27  | 7.29  | 6.11  | 1.99E-08 | 3.56E-07 | 8.93 |
| ILMN_1684306 | S100A4  | 0.75  | 9.81  | 6.11  | 2.00E-08 | 3.57E-07 | 8.93 |
| ILMN_1681591 | PTPN1   | 0.45  | 9.20  | 6.11  | 2.00E-08 | 3.58E-07 | 8.93 |
| ILMN_1852022 | PLIN4   | 0.39  | 6.79  | 6.12  | 2.01E-08 | 3.58E-07 | 8.93 |
| ILMN_3249501 | ZNF697  | 0.16  | 6.62  | 6.11  | 2.01E-08 | 3.60E-07 | 8.92 |
| ILMN_1778104 | ACADM   | -0.46 | 9.01  | -6.11 | 2.03E-08 | 3.63E-07 | 8.91 |
| ILMN_1673788 | CDV3    | 0.38  | 9.13  | 6.11  | 2.06E-08 | 3.67E-07 | 8.90 |
| ILMN_3259176 | NA      | -0.31 | 7.06  | -6.11 | 2.06E-08 | 3.68E-07 | 8.90 |
| ILMN_1657892 | TLR8    | 0.33  | 6.83  | 6.10  | 2.08E-08 | 3.70E-07 | 8.89 |
| ILMN_1701603 | ALPL    | 0.52  | 7.16  | 6.10  | 2.07E-08 | 3.70E-07 | 8.89 |
| ILMN_1755352 | TUB     | 0.19  | 6.57  | 6.10  | 2.08E-08 | 3.70E-07 | 8.89 |
| ILMN_2404688 | NUPR1   | -0.67 | 8.17  | -6.10 | 2.10E-08 | 3.74E-07 | 8.88 |
| ILMN_1713249 | PHF19   | 0.26  | 7.33  | 6.10  | 2.13E-08 | 3.78E-07 | 8.87 |
| ILMN_3240901 | ZBTB7C  | -0.43 | 7.51  | -6.10 | 2.13E-08 | 3.78E-07 | 8.87 |
| ILMN_1751615 | COQ10B  | 0.27  | 9.45  | 6.10  | 2.14E-08 | 3.79E-07 | 8.86 |
| ILMN_2387799 | PDPK1   | -0.23 | 8.97  | -6.10 | 2.16E-08 | 3.84E-07 | 8.86 |
| ILMN_1803033 | MGST1   | -0.21 | 6.89  | -6.10 | 2.17E-08 | 3.84E-07 | 8.86 |
| ILMN_1796417 | ASNS    | 0.33  | 8.46  | 6.09  | 2.18E-08 | 3.87E-07 | 8.84 |
| ILMN_1761113 | GNL2    | 0.25  | 9.44  | 6.09  | 2.19E-08 | 3.88E-07 | 8.84 |
| ILMN_3232894 | CNRIP1  | 0.44  | 8.14  | 6.09  | 2.20E-08 | 3.90E-07 | 8.83 |
| ILMN_1736965 | SIGIRR  | -0.21 | 7.01  | -6.09 | 2.21E-08 | 3.92E-07 | 8.83 |
| ILMN_2368971 | PSMD12  | 0.31  | 8.25  | 6.09  | 2.22E-08 | 3.93E-07 | 8.83 |
| ILMN_1803686 | ADA     | 0.42  | 7.07  | 6.09  | 2.23E-08 | 3.94E-07 | 8.82 |
| ILMN_2312719 | EXOSC9  | 0.24  | 7.49  | 6.09  | 2.23E-08 | 3.95E-07 | 8.83 |
| ILMN_2357134 | SPHK1   | 0.35  | 6.55  | 6.09  | 2.24E-08 | 3.96E-07 | 8.82 |
| ILMN_1760087 | SLC26A3 | -0.73 | 12.89 | -6.09 | 2.25E-08 | 3.97E-07 | 8.81 |
| ILMN_1768812 | FXYP6   | 0.32  | 6.91  | 6.09  | 2.25E-08 | 3.98E-07 | 8.81 |
| ILMN_2353697 | HINFP   | -0.22 | 6.97  | -6.08 | 2.28E-08 | 4.03E-07 | 8.80 |
| ILMN_1703228 | AGFG2   | -0.26 | 6.94  | -6.09 | 2.29E-08 | 4.04E-07 | 8.80 |
| ILMN_1704376 | GLDN    | -1.12 | 7.96  | -6.08 | 2.35E-08 | 4.14E-07 | 8.77 |
| ILMN_2342903 | GIPC1   | -0.27 | 6.95  | -6.08 | 2.35E-08 | 4.14E-07 | 8.77 |
| ILMN_1784447 | PLCE1   | -0.47 | 8.36  | -6.08 | 2.35E-08 | 4.15E-07 | 8.77 |
| ILMN_1716237 | ACOT2   | -0.23 | 6.92  | -6.08 | 2.36E-08 | 4.16E-07 | 8.76 |
| ILMN_2338963 | SLC29A1 | 0.19  | 6.74  | 6.08  | 2.36E-08 | 4.16E-07 | 8.77 |
| ILMN_1793017 | DGKQ    | -0.44 | 9.07  | -6.07 | 2.37E-08 | 4.17E-07 | 8.76 |
| ILMN_1901419 | RNU11   | 0.55  | 6.81  | 6.07  | 2.38E-08 | 4.18E-07 | 8.76 |
| ILMN_1681135 | SPATA2  | -0.26 | 7.20  | -6.07 | 2.39E-08 | 4.19E-07 | 8.76 |
| ILMN_2235851 | NEURL3  | -0.26 | 6.69  | -6.07 | 2.39E-08 | 4.19E-07 | 8.76 |
| ILMN_1803423 | ARHGEF6 | 0.58  | 8.66  | 6.07  | 2.41E-08 | 4.23E-07 | 8.75 |
| ILMN_1774261 | DOK4    | -0.45 | 8.38  | -6.07 | 2.43E-08 | 4.25E-07 | 8.74 |

|              |          |       |       |       |          |          |      |
|--------------|----------|-------|-------|-------|----------|----------|------|
| ILMN_1807277 | IFI30    | 0.53  | 7.60  | 6.07  | 2.43E-08 | 4.25E-07 | 8.74 |
| ILMN_1734744 | CDH19    | 0.31  | 6.74  | 6.07  | 2.43E-08 | 4.26E-07 | 8.74 |
| ILMN_1731596 | NA       | -0.26 | 7.04  | -6.07 | 2.44E-08 | 4.27E-07 | 8.73 |
| ILMN_1739450 | NFE2L1   | -0.32 | 8.66  | -6.07 | 2.45E-08 | 4.29E-07 | 8.73 |
| ILMN_1764794 | PSMB2    | 0.26  | 9.10  | 6.07  | 2.46E-08 | 4.30E-07 | 8.73 |
| ILMN_1689431 | APCDD1L  | 0.26  | 6.66  | 6.07  | 2.47E-08 | 4.32E-07 | 8.72 |
| ILMN_1803147 | NA       | -0.20 | 6.89  | -6.07 | 2.47E-08 | 4.32E-07 | 8.72 |
| ILMN_2114568 | GBP5     | 0.47  | 6.95  | 6.06  | 2.49E-08 | 4.36E-07 | 8.71 |
| ILMN_1807767 | GSE1     | -0.30 | 8.42  | -6.06 | 2.50E-08 | 4.37E-07 | 8.71 |
| ILMN_1667114 | RPSAP58  | -0.28 | 6.78  | -6.06 | 2.50E-08 | 4.37E-07 | 8.71 |
| ILMN_1726603 | ATP5I    | -0.26 | 12.02 | -6.06 | 2.51E-08 | 4.38E-07 | 8.71 |
| ILMN_1718132 | ECHS1    | -0.54 | 9.93  | -6.07 | 2.54E-08 | 4.42E-07 | 8.70 |
| ILMN_1709265 | RNF170   | -0.32 | 7.32  | -6.06 | 2.54E-08 | 4.43E-07 | 8.69 |
| ILMN_1689868 | TMEM80   | -0.28 | 7.23  | -6.06 | 2.55E-08 | 4.43E-07 | 8.69 |
| ILMN_2041236 | RAP1GAP2 | -0.37 | 8.09  | -6.06 | 2.55E-08 | 4.43E-07 | 8.69 |
| ILMN_1782257 | METT17   | -0.29 | 8.38  | -6.05 | 2.60E-08 | 4.53E-07 | 8.67 |
| ILMN_1672605 | MTURN    | 0.45  | 8.46  | 6.06  | 2.62E-08 | 4.56E-07 | 8.67 |
| ILMN_2168217 | GPR183   | 0.69  | 7.42  | 6.05  | 2.62E-08 | 4.56E-07 | 8.66 |
| ILMN_1761072 | AIDA     | 0.23  | 7.14  | 6.05  | 2.64E-08 | 4.58E-07 | 8.66 |
| ILMN_1803941 | TBC1D15  | 0.28  | 8.17  | 6.05  | 2.65E-08 | 4.59E-07 | 8.66 |
| ILMN_1764043 | TTL      | 0.36  | 7.99  | 6.05  | 2.65E-08 | 4.60E-07 | 8.65 |
| ILMN_1723971 | SLC29A1  | 0.29  | 7.03  | 6.05  | 2.66E-08 | 4.62E-07 | 8.65 |
| ILMN_1698487 | SDHD     | -0.33 | 9.74  | -6.05 | 2.67E-08 | 4.63E-07 | 8.65 |
| ILMN_1658289 | WDR54    | 0.36  | 7.80  | 6.05  | 2.68E-08 | 4.64E-07 | 8.64 |
| ILMN_1790603 | ATPAF1   | -0.39 | 8.61  | -6.05 | 2.70E-08 | 4.68E-07 | 8.64 |
| ILMN_1797191 | KIAA0040 | 0.22  | 6.77  | 6.04  | 2.72E-08 | 4.71E-07 | 8.63 |
| ILMN_1908274 | NA       | -0.21 | 7.02  | -6.04 | 2.72E-08 | 4.71E-07 | 8.63 |
| ILMN_1660462 | MCOLN2   | -1.04 | 9.42  | -6.04 | 2.73E-08 | 4.71E-07 | 8.63 |
| ILMN_2376263 | SMARCA1  | 0.37  | 7.23  | 6.04  | 2.73E-08 | 4.71E-07 | 8.63 |
| ILMN_1761808 | MCFD2    | 0.34  | 7.80  | 6.04  | 2.73E-08 | 4.72E-07 | 8.62 |
| ILMN_1880012 | SEMA5A   | -0.35 | 7.41  | -6.04 | 2.74E-08 | 4.73E-07 | 8.62 |
| ILMN_1772929 | ATP5J    | -0.26 | 11.61 | -6.04 | 2.76E-08 | 4.76E-07 | 8.61 |
| ILMN_1691570 | METT15   | 0.26  | 8.75  | 6.04  | 2.77E-08 | 4.78E-07 | 8.61 |
| ILMN_1810334 | COMMD7   | -0.25 | 9.68  | -6.05 | 2.77E-08 | 4.78E-07 | 8.62 |
| ILMN_1806502 | ZNF165   | 0.27  | 7.35  | 6.04  | 2.78E-08 | 4.78E-07 | 8.61 |
| ILMN_2315979 | LBH      | 0.45  | 7.84  | 6.04  | 2.78E-08 | 4.78E-07 | 8.61 |
| ILMN_2389876 | TGFB111  | 0.37  | 7.65  | 6.04  | 2.78E-08 | 4.78E-07 | 8.61 |
| ILMN_2391912 | SEC14L1  | 0.21  | 6.74  | 6.04  | 2.79E-08 | 4.80E-07 | 8.60 |
| ILMN_1816582 | NA       | -0.28 | 6.83  | -6.04 | 2.80E-08 | 4.81E-07 | 8.61 |
| ILMN_1737396 | PSMD14   | 0.31  | 8.92  | 6.04  | 2.81E-08 | 4.82E-07 | 8.60 |
| ILMN_1864900 | MIAT     | 0.45  | 6.91  | 6.04  | 2.83E-08 | 4.86E-07 | 8.59 |
| ILMN_2307455 | UBE2A    | -0.33 | 9.59  | -6.04 | 2.84E-08 | 4.87E-07 | 8.59 |
| ILMN_1750722 | RPS7     | 0.27  | 7.73  | 6.03  | 2.85E-08 | 4.89E-07 | 8.58 |
| ILMN_2404135 | RIOK3    | -0.37 | 9.62  | -6.04 | 2.90E-08 | 4.97E-07 | 8.57 |
| ILMN_1897310 | LETM1    | -0.55 | 8.93  | -6.03 | 2.94E-08 | 5.04E-07 | 8.55 |
| ILMN_1685176 | SGMS2    | 0.24  | 6.74  | 6.03  | 2.95E-08 | 5.05E-07 | 8.55 |
| ILMN_1709590 | PGM5     | 0.72  | 8.33  | 6.03  | 2.96E-08 | 5.07E-07 | 8.55 |
| ILMN_1807439 | ALDH1A3  | 0.46  | 7.61  | 6.02  | 2.99E-08 | 5.12E-07 | 8.54 |

|              |           |       |       |       |          |          |      |
|--------------|-----------|-------|-------|-------|----------|----------|------|
| ILMN_1762531 | FGF9      | -0.41 | 7.22  | -6.02 | 3.00E-08 | 5.14E-07 | 8.53 |
| ILMN_1684873 | ARSD      | -0.65 | 8.95  | -6.02 | 3.06E-08 | 5.24E-07 | 8.51 |
| ILMN_1799598 | SIRT5     | -0.19 | 6.93  | -6.02 | 3.07E-08 | 5.24E-07 | 8.51 |
| ILMN_1740875 | FPR2      | 0.29  | 6.50  | 6.02  | 3.10E-08 | 5.30E-07 | 8.50 |
| ILMN_1679600 | ACOT8     | -0.26 | 6.95  | -6.01 | 3.11E-08 | 5.31E-07 | 8.50 |
| ILMN_2094396 | LRRC8C    | 0.19  | 6.51  | 6.01  | 3.12E-08 | 5.33E-07 | 8.49 |
| ILMN_1722309 | ENDOG     | -0.26 | 7.17  | -6.01 | 3.14E-08 | 5.36E-07 | 8.49 |
| ILMN_1740772 | APBB3     | -0.33 | 8.74  | -6.01 | 3.16E-08 | 5.40E-07 | 8.48 |
| ILMN_1782743 | LETMD1    | -0.27 | 8.30  | -6.01 | 3.17E-08 | 5.41E-07 | 8.48 |
| ILMN_3240365 | MNX1      | -0.36 | 7.28  | -6.01 | 3.18E-08 | 5.41E-07 | 8.48 |
| ILMN_1796210 | PPRC1     | 0.39  | 8.05  | 6.01  | 3.19E-08 | 5.43E-07 | 8.47 |
| ILMN_1683562 | SNRPG     | 0.28  | 11.36 | 6.01  | 3.22E-08 | 5.48E-07 | 8.46 |
| ILMN_2077094 | VPS51     | -0.30 | 9.39  | -6.01 | 3.22E-08 | 5.48E-07 | 8.46 |
| ILMN_1722286 | ABCA5     | -0.20 | 6.63  | -6.01 | 3.24E-08 | 5.51E-07 | 8.46 |
| ILMN_1797875 | ALOX5AP   | 0.78  | 9.19  | 6.00  | 3.34E-08 | 5.68E-07 | 8.43 |
| ILMN_1660629 | NBEAL2    | 0.35  | 7.58  | 6.00  | 3.35E-08 | 5.68E-07 | 8.43 |
| ILMN_1760849 | NETO2     | -0.64 | 7.25  | -6.00 | 3.35E-08 | 5.68E-07 | 8.43 |
| ILMN_3305849 | LINC01137 | -0.26 | 7.32  | -6.00 | 3.38E-08 | 5.74E-07 | 8.42 |
| ILMN_2219683 | NEU4      | -0.83 | 7.92  | -6.00 | 3.39E-08 | 5.75E-07 | 8.42 |
| ILMN_1664294 | P3H1      | 0.21  | 6.94  | 5.99  | 3.42E-08 | 5.80E-07 | 8.41 |
| ILMN_1700380 | ATP6V0A2  | -0.25 | 7.85  | -5.99 | 3.43E-08 | 5.81E-07 | 8.41 |
| ILMN_1721035 | MS4A6A    | 0.84  | 9.11  | 5.99  | 3.44E-08 | 5.82E-07 | 8.40 |
| ILMN_1806825 | CEP128    | 0.25  | 6.73  | 5.99  | 3.44E-08 | 5.82E-07 | 8.40 |
| ILMN_2276811 | METTL17   | -0.29 | 7.42  | -5.99 | 3.46E-08 | 5.85E-07 | 8.40 |
| ILMN_1663640 | MAOA      | -0.59 | 11.48 | -5.99 | 3.47E-08 | 5.87E-07 | 8.39 |
| ILMN_2148469 | RASL11B   | 0.22  | 6.68  | 5.99  | 3.49E-08 | 5.90E-07 | 8.39 |
| ILMN_1675669 | IBTK      | 0.36  | 8.61  | 5.99  | 3.50E-08 | 5.91E-07 | 8.38 |
| ILMN_1729142 | CENPV     | -0.49 | 8.51  | -5.99 | 3.50E-08 | 5.92E-07 | 8.38 |
| ILMN_2202940 | CHPT1     | -0.46 | 9.04  | -5.99 | 3.51E-08 | 5.92E-07 | 8.38 |
| ILMN_1759419 | ILVBL     | -0.38 | 8.42  | -5.99 | 3.52E-08 | 5.93E-07 | 8.38 |
| ILMN_2246661 | FAHD1     | -0.51 | 9.76  | -5.99 | 3.55E-08 | 5.99E-07 | 8.37 |
| ILMN_1772798 | ARPP19    | 0.21  | 7.53  | 5.99  | 3.55E-08 | 5.99E-07 | 8.37 |
| ILMN_1802257 | PCTP      | -0.25 | 7.44  | -5.98 | 3.56E-08 | 6.00E-07 | 8.37 |
| ILMN_1880983 | NA        | 0.24  | 6.88  | 5.98  | 3.59E-08 | 6.03E-07 | 8.36 |
| ILMN_2164081 | KLHL12    | -0.28 | 8.82  | -5.98 | 3.59E-08 | 6.03E-07 | 8.36 |
| ILMN_1846249 | NA        | -0.29 | 6.90  | -5.98 | 3.61E-08 | 6.06E-07 | 8.36 |
| ILMN_1737298 | MAT2A     | 0.34  | 10.99 | 5.98  | 3.63E-08 | 6.10E-07 | 8.35 |
| ILMN_1656310 | IDO1      | 0.49  | 6.84  | 5.98  | 3.65E-08 | 6.13E-07 | 8.34 |
| ILMN_1677511 | PTGS2     | 0.90  | 7.27  | 5.98  | 3.69E-08 | 6.19E-07 | 8.34 |
| ILMN_1805448 | EPB41L2   | 0.39  | 8.32  | 5.98  | 3.69E-08 | 6.19E-07 | 8.33 |
| ILMN_1715273 | PICALM    | 0.33  | 9.80  | 5.98  | 3.70E-08 | 6.20E-07 | 8.33 |
| ILMN_1679495 | ULK3      | -0.23 | 6.92  | -5.98 | 3.71E-08 | 6.22E-07 | 8.33 |
| ILMN_1687035 | ADAMTSL4  | 0.18  | 6.72  | 5.97  | 3.72E-08 | 6.24E-07 | 8.32 |
| ILMN_1803312 | DIMT1     | 0.28  | 9.20  | 5.97  | 3.75E-08 | 6.28E-07 | 8.32 |
| ILMN_1701457 | FAHD1     | -0.44 | 7.67  | -5.97 | 3.75E-08 | 6.28E-07 | 8.32 |
| ILMN_1909886 | NA        | -0.48 | 8.07  | -5.97 | 3.75E-08 | 6.28E-07 | 8.32 |
| ILMN_2209238 | MFSD4A    | -0.41 | 6.97  | -5.98 | 3.75E-08 | 6.28E-07 | 8.32 |
| ILMN_2344373 | MVP       | -0.40 | 8.29  | -5.97 | 3.77E-08 | 6.31E-07 | 8.31 |

|              |          |       |       |       |          |          |      |
|--------------|----------|-------|-------|-------|----------|----------|------|
| ILMN_1778977 | TYROBP   | 1.00  | 9.03  | 5.97  | 3.79E-08 | 6.34E-07 | 8.31 |
| ILMN_1811278 | RNF186   | -0.53 | 7.95  | -5.97 | 3.82E-08 | 6.38E-07 | 8.30 |
| ILMN_1718071 | AGTPBP1  | 0.24  | 7.56  | 5.97  | 3.84E-08 | 6.40E-07 | 8.30 |
| ILMN_1722662 | RAD23B   | 0.29  | 7.85  | 5.97  | 3.83E-08 | 6.40E-07 | 8.30 |
| ILMN_3262348 | IP6K2    | -0.30 | 7.15  | -5.97 | 3.85E-08 | 6.42E-07 | 8.29 |
| ILMN_1720270 | CDR2     | 0.31  | 8.52  | 5.97  | 3.86E-08 | 6.43E-07 | 8.29 |
| ILMN_2403994 | RALY     | -0.33 | 8.38  | -5.97 | 3.88E-08 | 6.47E-07 | 8.28 |
| ILMN_1711069 | YPEL5    | 0.26  | 9.56  | 5.96  | 3.92E-08 | 6.53E-07 | 8.27 |
| ILMN_2317581 | SHANK3   | 0.43  | 7.69  | 5.96  | 3.99E-08 | 6.65E-07 | 8.26 |
| ILMN_1682599 | GPRC5A   | 0.60  | 7.51  | 5.96  | 4.04E-08 | 6.72E-07 | 8.25 |
| ILMN_1726839 | DCUN1D5  | 0.37  | 8.14  | 5.95  | 4.07E-08 | 6.78E-07 | 8.24 |
| ILMN_2337923 | TPD52L1  | 0.36  | 7.06  | 5.96  | 4.11E-08 | 6.83E-07 | 8.23 |
| ILMN_2365528 | HAUS8    | -0.17 | 6.89  | -5.95 | 4.11E-08 | 6.83E-07 | 8.23 |
| ILMN_1740938 | APOE     | 0.78  | 8.97  | 5.95  | 4.11E-08 | 6.83E-07 | 8.23 |
| ILMN_2342579 | IL7R     | 0.66  | 7.93  | 5.95  | 4.16E-08 | 6.90E-07 | 8.22 |
| ILMN_2192032 | SRP19    | 0.28  | 8.70  | 5.95  | 4.16E-08 | 6.91E-07 | 8.22 |
| ILMN_1677038 | CPED1    | 0.48  | 8.48  | 5.95  | 4.17E-08 | 6.92E-07 | 8.21 |
| ILMN_1737588 | C21orf33 | -0.40 | 9.90  | -5.95 | 4.18E-08 | 6.93E-07 | 8.21 |
| ILMN_1799836 | HOXA2    | -0.27 | 6.83  | -5.95 | 4.19E-08 | 6.94E-07 | 8.21 |
| ILMN_1806386 | NXPE4    | -1.07 | 10.26 | -5.95 | 4.20E-08 | 6.95E-07 | 8.21 |
| ILMN_1700432 | ITPKB    | 0.28  | 7.08  | 5.95  | 4.21E-08 | 6.97E-07 | 8.20 |
| ILMN_2109994 | NA       | -0.25 | 7.23  | -5.95 | 4.21E-08 | 6.97E-07 | 8.21 |
| ILMN_1656869 | NA       | -0.20 | 6.99  | -5.95 | 4.22E-08 | 6.97E-07 | 8.20 |
| ILMN_1716265 | PGM2L1   | 0.25  | 7.26  | 5.95  | 4.24E-08 | 7.01E-07 | 8.20 |
| ILMN_1670172 | WDR33    | 0.33  | 8.91  | 5.94  | 4.27E-08 | 7.06E-07 | 8.19 |
| ILMN_2073604 | EBP      | -0.47 | 8.31  | -5.94 | 4.28E-08 | 7.06E-07 | 8.19 |
| ILMN_2083334 | NA       | -0.30 | 7.84  | -5.94 | 4.28E-08 | 7.06E-07 | 8.19 |
| ILMN_1730977 | SLC44A4  | -0.51 | 10.03 | -5.94 | 4.30E-08 | 7.10E-07 | 8.18 |
| ILMN_1693136 | VTI1B    | -0.22 | 7.79  | -5.94 | 4.34E-08 | 7.16E-07 | 8.18 |
| ILMN_1813117 | ITGA9    | 0.27  | 6.98  | 5.94  | 4.36E-08 | 7.19E-07 | 8.17 |
| ILMN_2129572 | F3       | 0.57  | 8.31  | 5.94  | 4.38E-08 | 7.22E-07 | 8.17 |
| ILMN_2321416 | DIAPH1   | 0.39  | 8.77  | 5.94  | 4.42E-08 | 7.28E-07 | 8.16 |
| ILMN_1674038 | CTSD     | -0.37 | 8.89  | -5.94 | 4.44E-08 | 7.31E-07 | 8.15 |
| ILMN_1764788 | TNFRSF1B | 0.49  | 8.83  | 5.94  | 4.45E-08 | 7.31E-07 | 8.15 |
| ILMN_1680130 | DYM      | 0.20  | 8.08  | 5.93  | 4.47E-08 | 7.35E-07 | 8.15 |
| ILMN_1789338 | SORBS3   | -0.37 | 7.75  | -5.93 | 4.47E-08 | 7.35E-07 | 8.15 |
| ILMN_1770084 | TACC1    | 0.30  | 10.74 | 5.93  | 4.49E-08 | 7.37E-07 | 8.14 |
| ILMN_3298423 | TOX2     | 0.32  | 7.13  | 5.94  | 4.49E-08 | 7.37E-07 | 8.15 |
| ILMN_1741711 | DOPEY2   | -0.32 | 7.69  | -5.93 | 4.50E-08 | 7.38E-07 | 8.14 |
| ILMN_2214355 | RAB30    | 0.32  | 6.83  | 5.93  | 4.51E-08 | 7.39E-07 | 8.14 |
| ILMN_1777971 | RNF126P1 | 0.60  | 6.83  | 5.93  | 4.51E-08 | 7.39E-07 | 8.14 |
| ILMN_1683969 | FKBP1A   | -0.34 | 8.58  | -5.93 | 4.51E-08 | 7.40E-07 | 8.14 |
| ILMN_1730794 | SERTAD4  | -0.27 | 7.03  | -5.93 | 4.53E-08 | 7.41E-07 | 8.14 |
| ILMN_2278984 | NXPE4    | -0.83 | 8.86  | -5.93 | 4.55E-08 | 7.44E-07 | 8.13 |
| ILMN_2297765 | KCNMA1   | 0.46  | 8.69  | 5.93  | 4.57E-08 | 7.47E-07 | 8.13 |
| ILMN_1805519 | CD24     | -0.70 | 9.16  | -5.93 | 4.57E-08 | 7.48E-07 | 8.12 |
| ILMN_1781819 | PAPSS1   | 0.32  | 8.52  | 5.93  | 4.59E-08 | 7.51E-07 | 8.12 |
| ILMN_1707634 | CMC1     | -0.26 | 7.69  | -5.93 | 4.62E-08 | 7.54E-07 | 8.12 |

|              |          |       |       |       |          |          |      |
|--------------|----------|-------|-------|-------|----------|----------|------|
| ILMN_2212590 | TMEM170A | -0.26 | 7.41  | -5.93 | 4.62E-08 | 7.54E-07 | 8.12 |
| ILMN_1746864 | CYTIP    | 0.61  | 7.68  | 5.93  | 4.64E-08 | 7.57E-07 | 8.12 |
| ILMN_1688722 | IL13RA2  | 0.52  | 6.73  | 5.92  | 4.66E-08 | 7.60E-07 | 8.11 |
| ILMN_2335669 | ZC3H14   | -0.26 | 7.90  | -5.92 | 4.67E-08 | 7.61E-07 | 8.11 |
| ILMN_2332105 | WRNIP1   | -0.18 | 9.43  | -5.92 | 4.68E-08 | 7.62E-07 | 8.10 |
| ILMN_1661078 | PHGR1    | -0.61 | 13.09 | -5.92 | 4.70E-08 | 7.66E-07 | 8.10 |
| ILMN_2359601 | CAMK2G   | -0.24 | 7.07  | -5.92 | 4.73E-08 | 7.70E-07 | 8.09 |
| ILMN_1791447 | CXCL12   | 0.62  | 8.91  | 5.92  | 4.74E-08 | 7.72E-07 | 8.09 |
| ILMN_1809467 | VAMP5    | 0.34  | 8.22  | 5.92  | 4.75E-08 | 7.73E-07 | 8.09 |
| ILMN_1763491 | CKMT1B   | -0.50 | 8.81  | -5.92 | 4.76E-08 | 7.73E-07 | 8.09 |
| ILMN_1781388 | PGM5     | 0.77  | 8.45  | 5.93  | 4.76E-08 | 7.73E-07 | 8.09 |
| ILMN_1796235 | UTP4     | 0.34  | 8.58  | 5.92  | 4.77E-08 | 7.74E-07 | 8.08 |
| ILMN_1653115 | ECH1     | -0.46 | 10.27 | -5.93 | 4.80E-08 | 7.80E-07 | 8.09 |
| ILMN_1795257 | GPT      | -0.59 | 8.29  | -5.92 | 4.81E-08 | 7.81E-07 | 8.08 |
| ILMN_1690282 | CRADD    | -0.19 | 7.66  | -5.92 | 4.82E-08 | 7.82E-07 | 8.07 |
| ILMN_1782560 | CD86     | 0.41  | 7.03  | 5.92  | 4.85E-08 | 7.87E-07 | 8.07 |
| ILMN_1792972 | ZNF439   | -0.29 | 7.33  | -5.91 | 4.87E-08 | 7.89E-07 | 8.06 |
| ILMN_1814917 | TLE2     | -0.38 | 7.29  | -5.91 | 4.92E-08 | 7.96E-07 | 8.05 |
| ILMN_2143566 | SLC39A6  | 0.21  | 6.68  | 5.91  | 4.94E-08 | 8.00E-07 | 8.05 |
| ILMN_1685077 | SNX7     | -0.24 | 7.47  | -5.91 | 4.95E-08 | 8.02E-07 | 8.05 |
| ILMN_1727150 | DHRS9    | -0.25 | 6.81  | -5.91 | 4.98E-08 | 8.06E-07 | 8.04 |
| ILMN_2240221 | SYTL2    | -0.36 | 7.49  | -5.91 | 4.98E-08 | 8.06E-07 | 8.04 |
| ILMN_2329679 | TPST2    | 0.47  | 8.24  | 5.91  | 4.99E-08 | 8.07E-07 | 8.04 |
| ILMN_1800958 | TMEM237  | 0.26  | 7.27  | 5.91  | 5.01E-08 | 8.09E-07 | 8.04 |
| ILMN_2397602 | ERBB3    | -0.20 | 6.74  | -5.91 | 5.06E-08 | 8.17E-07 | 8.03 |
| ILMN_2071682 | FAM196A  | -0.23 | 7.00  | -5.91 | 5.08E-08 | 8.19E-07 | 8.02 |
| ILMN_3249949 | C11orf58 | 0.26  | 8.05  | 5.91  | 5.08E-08 | 8.20E-07 | 8.02 |
| ILMN_3248649 | MYO15B   | -0.64 | 9.12  | -5.90 | 5.09E-08 | 8.22E-07 | 8.02 |
| ILMN_1710427 | VPS37B   | -0.34 | 8.60  | -5.90 | 5.12E-08 | 8.26E-07 | 8.01 |
| ILMN_2311537 | HMGA1    | 0.40  | 8.67  | 5.90  | 5.18E-08 | 8.34E-07 | 8.00 |
| ILMN_1697820 | HINT2    | -0.34 | 8.47  | -5.90 | 5.22E-08 | 8.40E-07 | 8.00 |
| ILMN_3243890 | NDUFA2   | -0.31 | 10.50 | -5.90 | 5.26E-08 | 8.46E-07 | 7.99 |
| ILMN_1712088 | CLYBL    | -0.40 | 8.06  | -5.90 | 5.26E-08 | 8.47E-07 | 7.99 |
| ILMN_1710740 | C2       | 0.36  | 7.04  | 5.90  | 5.30E-08 | 8.52E-07 | 7.98 |
| ILMN_1896012 | NA       | 0.23  | 6.54  | 5.90  | 5.30E-08 | 8.52E-07 | 7.98 |
| ILMN_1779670 | A1CF     | -0.23 | 6.67  | -5.89 | 5.35E-08 | 8.59E-07 | 7.97 |
| ILMN_1721989 | ATP5F1   | -0.27 | 11.45 | -5.89 | 5.36E-08 | 8.61E-07 | 7.97 |
| ILMN_2219466 | APOBEC3B | -0.38 | 6.84  | -5.89 | 5.40E-08 | 8.67E-07 | 7.96 |
| ILMN_1795906 | PCBD1    | -0.35 | 8.17  | -5.89 | 5.43E-08 | 8.71E-07 | 7.96 |
| ILMN_1811327 | MRPL27   | -0.51 | 8.48  | -5.89 | 5.43E-08 | 8.71E-07 | 7.96 |
| ILMN_2380999 | RECQL    | 0.32  | 7.73  | 5.89  | 5.45E-08 | 8.73E-07 | 7.96 |
| ILMN_1680948 | LMOD1    | 0.28  | 6.66  | 5.89  | 5.46E-08 | 8.74E-07 | 7.95 |
| ILMN_1652806 | ATP5J    | -0.29 | 9.41  | -5.89 | 5.53E-08 | 8.85E-07 | 7.94 |
| ILMN_1789436 | DENND1B  | -0.33 | 9.12  | -5.89 | 5.55E-08 | 8.89E-07 | 7.94 |
| ILMN_1805636 | PGAP3    | -0.53 | 8.62  | -5.89 | 5.61E-08 | 8.98E-07 | 7.93 |
| ILMN_2102693 | NUFIP2   | 0.27  | 8.13  | 5.88  | 5.62E-08 | 8.99E-07 | 7.92 |
| ILMN_1769926 | DBN1     | 0.27  | 7.26  | 5.88  | 5.65E-08 | 9.03E-07 | 7.92 |
| ILMN_2231911 | AUH      | -0.28 | 7.49  | -5.88 | 5.66E-08 | 9.05E-07 | 7.92 |

|              |          |       |       |       |          |          |      |
|--------------|----------|-------|-------|-------|----------|----------|------|
| ILMN_1789457 | GNL1     | 0.21  | 7.59  | 5.88  | 5.69E-08 | 9.09E-07 | 7.91 |
| ILMN_1664833 | MRPL50   | 0.30  | 8.54  | 5.88  | 5.71E-08 | 9.10E-07 | 7.91 |
| ILMN_1694268 | HES6     | -0.51 | 8.60  | -5.88 | 5.70E-08 | 9.10E-07 | 7.91 |
| ILMN_1745223 | CDC42EP4 | -0.27 | 9.96  | -5.88 | 5.73E-08 | 9.13E-07 | 7.91 |
| ILMN_1670079 | OMA1     | -0.27 | 8.01  | -5.88 | 5.73E-08 | 9.14E-07 | 7.91 |
| ILMN_1729514 | CMTM4    | -0.18 | 6.64  | -5.88 | 5.75E-08 | 9.15E-07 | 7.90 |
| ILMN_1734184 | PLBD2    | 0.21  | 6.84  | 5.88  | 5.80E-08 | 9.24E-07 | 7.89 |
| ILMN_1803745 | SUOX     | -0.36 | 8.35  | -5.88 | 5.81E-08 | 9.25E-07 | 7.89 |
| ILMN_2329429 | GIMAP6   | 0.34  | 7.32  | 5.87  | 5.85E-08 | 9.30E-07 | 7.89 |
| ILMN_1808157 | RUNDC3B  | -0.44 | 7.39  | -5.87 | 5.90E-08 | 9.39E-07 | 7.88 |
| ILMN_1798971 | FZD5     | -0.37 | 7.36  | -5.87 | 5.91E-08 | 9.39E-07 | 7.88 |
| ILMN_1780533 | RNASE6   | 0.41  | 7.24  | 5.87  | 5.92E-08 | 9.41E-07 | 7.87 |
| ILMN_1651282 | COL17A1  | -0.73 | 10.48 | -5.87 | 5.93E-08 | 9.42E-07 | 7.87 |
| ILMN_1700915 | NA       | 0.33  | 9.09  | 5.87  | 5.94E-08 | 9.43E-07 | 7.87 |
| ILMN_1714461 | RNF14    | -0.29 | 9.14  | -5.87 | 5.97E-08 | 9.46E-07 | 7.87 |
| ILMN_1781745 | C9orf152 | -0.56 | 10.35 | -5.87 | 5.97E-08 | 9.47E-07 | 7.87 |
| ILMN_1689189 | ZBTB3    | -0.22 | 6.98  | -5.87 | 5.98E-08 | 9.49E-07 | 7.87 |
| ILMN_1758164 | STC1     | 0.95  | 7.13  | 5.87  | 6.02E-08 | 9.53E-07 | 7.86 |
| ILMN_2363658 | PXDN     | 0.46  | 8.03  | 5.87  | 6.02E-08 | 9.53E-07 | 7.86 |
| ILMN_2389506 | HSD11B1  | 0.17  | 6.41  | 5.87  | 6.02E-08 | 9.53E-07 | 7.86 |
| ILMN_1803838 | CNFN     | -0.24 | 7.00  | -5.87 | 6.04E-08 | 9.56E-07 | 7.85 |
| ILMN_1685441 | ASAP3    | -0.40 | 8.35  | -5.86 | 6.10E-08 | 9.64E-07 | 7.85 |
| ILMN_2347193 | GSDMB    | -0.52 | 9.03  | -5.86 | 6.12E-08 | 9.67E-07 | 7.84 |
| ILMN_1748970 | PRR15L   | -0.66 | 10.25 | -5.86 | 6.17E-08 | 9.75E-07 | 7.84 |
| ILMN_1747451 | PLCXD1   | 0.60  | 8.00  | 5.86  | 6.20E-08 | 9.79E-07 | 7.83 |
| ILMN_1689817 | LCOR     | -0.31 | 8.74  | -5.86 | 6.23E-08 | 9.84E-07 | 7.82 |
| ILMN_1691376 | JAG1     | 0.27  | 8.55  | 5.86  | 6.24E-08 | 9.84E-07 | 7.82 |
| ILMN_1652333 | FN3KRP   | -0.43 | 8.78  | -5.86 | 6.31E-08 | 9.95E-07 | 7.82 |
| ILMN_1669259 | ANKRD49  | -0.23 | 7.96  | -5.86 | 6.31E-08 | 9.95E-07 | 7.81 |
| ILMN_3272227 | PLEKHA6  | -0.19 | 6.66  | -5.86 | 6.32E-08 | 9.96E-07 | 7.81 |
| ILMN_1748283 | PIM2     | 0.93  | 8.58  | 5.86  | 6.33E-08 | 9.98E-07 | 7.81 |
| ILMN_1782459 | OSBPL8   | 0.39  | 8.01  | 5.86  | 6.34E-08 | 9.99E-07 | 7.81 |
| ILMN_1695509 | PTPN12   | 0.29  | 8.17  | 5.86  | 6.36E-08 | 1.00E-06 | 7.81 |
| ILMN_1832656 | NA       | -0.15 | 6.61  | -5.85 | 6.36E-08 | 1.00E-06 | 7.80 |
| ILMN_3249669 | HEATR5A  | -0.22 | 7.18  | -5.85 | 6.42E-08 | 1.01E-06 | 7.80 |
| ILMN_1809456 | CNTFR    | -0.39 | 6.85  | -5.85 | 6.47E-08 | 1.02E-06 | 7.79 |
| ILMN_1764228 | DAB2     | 0.45  | 8.91  | 5.85  | 6.55E-08 | 1.03E-06 | 7.78 |
| ILMN_1668417 | WIPF1    | 0.54  | 7.49  | 5.85  | 6.65E-08 | 1.04E-06 | 7.76 |
| ILMN_1769118 | 9-Sep    | 0.24  | 11.52 | 5.84  | 6.66E-08 | 1.05E-06 | 7.76 |
| ILMN_1697267 | PRKCZ    | -0.38 | 7.50  | -5.84 | 6.67E-08 | 1.05E-06 | 7.76 |
| ILMN_2123743 | FCER1G   | 0.87  | 8.34  | 5.84  | 6.74E-08 | 1.06E-06 | 7.75 |
| ILMN_1724480 | AXIN2    | -0.54 | 8.66  | -5.84 | 6.80E-08 | 1.07E-06 | 7.74 |
| ILMN_1798360 | ACKR3    | 0.73  | 8.44  | 5.84  | 6.80E-08 | 1.07E-06 | 7.74 |
| ILMN_1731745 | NINJ2    | 0.27  | 7.16  | 5.83  | 6.96E-08 | 1.09E-06 | 7.72 |
| ILMN_2236440 | GLOD5    | -0.24 | 6.74  | -5.83 | 6.97E-08 | 1.09E-06 | 7.72 |
| ILMN_2396956 | AKAP13   | 0.27  | 9.17  | 5.83  | 7.04E-08 | 1.10E-06 | 7.71 |
| ILMN_1713182 | C3       | 0.63  | 7.41  | 5.83  | 7.05E-08 | 1.10E-06 | 7.71 |
| ILMN_1779558 | GAS6     | -0.45 | 9.35  | -5.83 | 7.06E-08 | 1.10E-06 | 7.70 |

|              |           |       |       |       |          |          |      |
|--------------|-----------|-------|-------|-------|----------|----------|------|
| ILMN_1719599 | SYTL4     | -0.34 | 8.40  | -5.83 | 7.08E-08 | 1.11E-06 | 7.70 |
| ILMN_1702363 | SULF1     | 0.56  | 7.92  | 5.83  | 7.10E-08 | 1.11E-06 | 7.70 |
| ILMN_1755024 | IKBKE     | -0.21 | 7.01  | -5.83 | 7.13E-08 | 1.11E-06 | 7.69 |
| ILMN_1687711 | ZNF576    | -0.19 | 7.14  | -5.83 | 7.17E-08 | 1.12E-06 | 7.69 |
| ILMN_1674394 | APMAP     | 0.26  | 8.11  | 5.83  | 7.19E-08 | 1.12E-06 | 7.69 |
| ILMN_1783753 | TXNDC12   | -0.25 | 10.11 | -5.82 | 7.30E-08 | 1.14E-06 | 7.67 |
| ILMN_1805853 | PHLDB3    | -0.27 | 6.83  | -5.82 | 7.35E-08 | 1.15E-06 | 7.67 |
| ILMN_1856533 | CDKL2     | -0.22 | 6.74  | -5.82 | 7.36E-08 | 1.15E-06 | 7.66 |
| ILMN_1656186 | SLC41A1   | 0.19  | 6.56  | 5.82  | 7.38E-08 | 1.15E-06 | 7.66 |
| ILMN_2320330 | MAL       | 0.21  | 6.71  | 5.82  | 7.40E-08 | 1.15E-06 | 7.66 |
| ILMN_1653871 | NAMPT     | 0.71  | 7.79  | 5.82  | 7.44E-08 | 1.16E-06 | 7.65 |
| ILMN_2124187 | TSC22D2   | 0.45  | 8.28  | 5.82  | 7.46E-08 | 1.16E-06 | 7.65 |
| ILMN_1689251 | ATL1      | -0.23 | 7.08  | -5.82 | 7.52E-08 | 1.17E-06 | 7.64 |
| ILMN_1787691 | CITED4    | 0.14  | 6.53  | 5.82  | 7.53E-08 | 1.17E-06 | 7.64 |
| ILMN_1898723 | NA        | 0.43  | 7.26  | 5.82  | 7.57E-08 | 1.18E-06 | 7.64 |
| ILMN_1792800 | LCN6      | 0.20  | 6.37  | 5.81  | 7.61E-08 | 1.18E-06 | 7.63 |
| ILMN_1663407 | SURF1     | -0.24 | 8.00  | -5.81 | 7.71E-08 | 1.20E-06 | 7.62 |
| ILMN_1832425 | NA        | -0.24 | 7.19  | -5.81 | 7.78E-08 | 1.21E-06 | 7.61 |
| ILMN_1764036 | P2RY14    | 0.19  | 6.48  | 5.81  | 7.89E-08 | 1.22E-06 | 7.60 |
| ILMN_1814859 | DDX47     | 0.28  | 9.24  | 5.80  | 7.98E-08 | 1.24E-06 | 7.59 |
| ILMN_2370872 | GRINA     | 0.46  | 7.70  | 5.80  | 7.99E-08 | 1.24E-06 | 7.58 |
| ILMN_3200717 | LOC643387 | 0.22  | 7.89  | 5.80  | 8.09E-08 | 1.25E-06 | 7.57 |
| ILMN_2168992 | FBXO30    | 0.19  | 6.83  | 5.80  | 8.12E-08 | 1.26E-06 | 7.57 |
| ILMN_1756806 | MCL1      | 0.52  | 7.82  | 5.80  | 8.16E-08 | 1.26E-06 | 7.56 |
| ILMN_1656415 | CDKN2C    | 0.27  | 6.80  | 5.80  | 8.16E-08 | 1.26E-06 | 7.56 |
| ILMN_1807710 | HINT1     | -0.23 | 11.73 | -5.80 | 8.16E-08 | 1.26E-06 | 7.56 |
| ILMN_2325168 | ARRB1     | -0.33 | 7.57  | -5.80 | 8.24E-08 | 1.27E-06 | 7.55 |
| ILMN_1725675 | ABCC6     | -0.22 | 6.66  | -5.80 | 8.26E-08 | 1.27E-06 | 7.55 |
| ILMN_2404085 | CLIP1     | 0.34  | 9.12  | 5.79  | 8.34E-08 | 1.29E-06 | 7.54 |
| ILMN_2371152 | KLC4      | -0.17 | 6.55  | -5.79 | 8.34E-08 | 1.29E-06 | 7.54 |
| ILMN_1842850 | NA        | -0.39 | 7.22  | -5.79 | 8.36E-08 | 1.29E-06 | 7.54 |
| ILMN_2087646 | HLX       | 0.30  | 7.10  | 5.79  | 8.36E-08 | 1.29E-06 | 7.54 |
| ILMN_1725338 | CLDN23    | -0.64 | 10.49 | -5.79 | 8.37E-08 | 1.29E-06 | 7.54 |
| ILMN_2220403 | GINM1     | -0.26 | 7.31  | -5.79 | 8.43E-08 | 1.30E-06 | 7.53 |
| ILMN_1680860 | LEMD2     | -0.20 | 7.85  | -5.79 | 8.51E-08 | 1.31E-06 | 7.52 |
| ILMN_1709044 | TGIF2     | 0.30  | 7.02  | 5.79  | 8.55E-08 | 1.32E-06 | 7.52 |
| ILMN_1663664 | MRPS10    | 0.23  | 9.20  | 5.79  | 8.58E-08 | 1.32E-06 | 7.51 |
| ILMN_1784706 | GABRE     | 0.38  | 7.34  | 5.82  | 8.60E-08 | 1.32E-06 | 7.55 |
| ILMN_1669703 | TNK2      | 0.50  | 8.59  | 5.79  | 8.62E-08 | 1.32E-06 | 7.51 |
| ILMN_1751368 | HNRNPD    | 0.30  | 11.14 | 5.78  | 8.72E-08 | 1.34E-06 | 7.50 |
| ILMN_1683462 | GSS       | -0.29 | 7.99  | -5.78 | 8.74E-08 | 1.34E-06 | 7.50 |
| ILMN_1691339 | CLEC1A    | 0.23  | 6.71  | 5.78  | 8.75E-08 | 1.34E-06 | 7.50 |
| ILMN_1724686 | CLDN1     | 0.59  | 6.93  | 5.78  | 8.79E-08 | 1.35E-06 | 7.49 |
| ILMN_2067408 | CLRN3     | -0.50 | 10.66 | -5.78 | 8.88E-08 | 1.36E-06 | 7.49 |
| ILMN_3248591 | LTBP2     | 0.37  | 7.17  | 5.78  | 8.97E-08 | 1.37E-06 | 7.47 |
| ILMN_2109708 | TYMP      | 0.67  | 9.83  | 5.78  | 8.98E-08 | 1.37E-06 | 7.48 |
| ILMN_2097793 | ZBTB4     | 0.29  | 9.19  | 5.77  | 9.09E-08 | 1.39E-06 | 7.46 |
| ILMN_1688452 | LCMT1     | -0.27 | 7.61  | -5.77 | 9.10E-08 | 1.39E-06 | 7.46 |

|              |           |       |       |       |          |          |      |
|--------------|-----------|-------|-------|-------|----------|----------|------|
| ILMN_1720430 | PPDPF     | -0.27 | 7.78  | -5.77 | 9.12E-08 | 1.39E-06 | 7.46 |
| ILMN_1776188 | MAP1LC3A  | -0.31 | 9.58  | -5.77 | 9.15E-08 | 1.40E-06 | 7.45 |
| ILMN_1750969 | FAM120AOS | -0.28 | 8.14  | -5.77 | 9.17E-08 | 1.40E-06 | 7.45 |
| ILMN_1719906 | HADH      | -0.46 | 10.51 | -5.77 | 9.23E-08 | 1.41E-06 | 7.44 |
| ILMN_1665736 | NA        | 0.48  | 8.96  | 5.77  | 9.31E-08 | 1.42E-06 | 7.44 |
| ILMN_3307827 | DNAJC4    | -0.24 | 7.87  | -5.77 | 9.32E-08 | 1.42E-06 | 7.43 |
| ILMN_1783304 | ATP1B3    | -0.36 | 10.57 | -5.77 | 9.34E-08 | 1.42E-06 | 7.43 |
| ILMN_2229032 | NME6      | -0.18 | 7.28  | -5.77 | 9.34E-08 | 1.42E-06 | 7.43 |
| ILMN_1727633 | NECTIN3   | -0.51 | 8.78  | -5.77 | 9.41E-08 | 1.43E-06 | 7.43 |
| ILMN_1798826 | MRPS25    | -0.27 | 8.75  | -5.78 | 9.41E-08 | 1.43E-06 | 7.44 |
| ILMN_2323338 | NR1I2     | -0.46 | 8.03  | -5.77 | 9.46E-08 | 1.44E-06 | 7.42 |
| ILMN_1654915 | MLLT4     | -0.29 | 8.59  | -5.76 | 9.50E-08 | 1.44E-06 | 7.42 |
| ILMN_1756220 | DDX18     | 0.26  | 9.36  | 5.76  | 9.49E-08 | 1.44E-06 | 7.42 |
| ILMN_1669323 | BACE2     | 0.49  | 8.17  | 5.76  | 9.53E-08 | 1.45E-06 | 7.41 |
| ILMN_1803647 | FAM162A   | -0.35 | 7.73  | -5.76 | 9.53E-08 | 1.45E-06 | 7.41 |
| ILMN_1734205 | RASSF1    | 0.28  | 7.62  | 5.76  | 9.55E-08 | 1.45E-06 | 7.41 |
| ILMN_3235176 | TRABD2A   | -0.59 | 8.58  | -5.76 | 9.56E-08 | 1.45E-06 | 7.41 |
| ILMN_1711124 | NA        | -0.42 | 8.62  | -5.76 | 9.58E-08 | 1.45E-06 | 7.41 |
| ILMN_1752639 | SLC25A24  | -0.31 | 7.23  | -5.76 | 9.60E-08 | 1.46E-06 | 7.41 |
| ILMN_3246608 | CENPV     | -0.31 | 7.78  | -5.76 | 9.68E-08 | 1.47E-06 | 7.40 |
| ILMN_2361862 | VLDLR     | -0.51 | 7.07  | -5.76 | 9.75E-08 | 1.48E-06 | 7.39 |
| ILMN_1760160 | STX1A     | 0.28  | 6.88  | 5.76  | 9.78E-08 | 1.48E-06 | 7.39 |
| ILMN_1671557 | PHLDA2    | 0.37  | 7.17  | 5.76  | 9.82E-08 | 1.49E-06 | 7.38 |
| ILMN_1759628 | ATP1B3    | -0.36 | 9.80  | -5.76 | 9.82E-08 | 1.49E-06 | 7.38 |
| ILMN_1773125 | ENTPD1    | 0.41  | 7.28  | 5.76  | 9.82E-08 | 1.49E-06 | 7.38 |
| ILMN_1664168 | SLC25A11  | -0.22 | 7.16  | -5.76 | 9.85E-08 | 1.49E-06 | 7.38 |
| ILMN_2228463 | DDC       | -0.60 | 8.31  | -5.75 | 9.96E-08 | 1.51E-06 | 7.37 |
| ILMN_2157435 | DYNLRB1   | -0.23 | 9.32  | -5.75 | 9.97E-08 | 1.51E-06 | 7.37 |
| ILMN_1735461 | DDX21     | 0.58  | 9.21  | 5.75  | 1.01E-07 | 1.52E-06 | 7.36 |
| ILMN_1766184 | NA        | -0.22 | 6.95  | -5.75 | 1.03E-07 | 1.56E-06 | 7.34 |
| ILMN_1699254 | PLEKHH1   | -0.42 | 8.30  | -5.75 | 1.04E-07 | 1.56E-06 | 7.33 |
| ILMN_1711862 | RNF7      | -0.24 | 10.73 | -5.74 | 1.04E-07 | 1.57E-06 | 7.33 |
| ILMN_1726516 | SCRIB     | -0.27 | 8.35  | -5.74 | 1.04E-07 | 1.57E-06 | 7.33 |
| ILMN_1713990 | TRIP6     | 0.29  | 8.10  | 5.74  | 1.04E-07 | 1.57E-06 | 7.33 |
| ILMN_2200836 | HSPB7     | 0.39  | 6.56  | 5.74  | 1.04E-07 | 1.57E-06 | 7.33 |
| ILMN_1651610 | SPRY1     | 0.40  | 8.48  | 5.74  | 1.05E-07 | 1.57E-06 | 7.32 |
| ILMN_1670420 | METAP2    | 0.21  | 9.90  | 5.75  | 1.05E-07 | 1.57E-06 | 7.33 |
| ILMN_1778625 | CD44      | 0.20  | 6.88  | 5.74  | 1.05E-07 | 1.58E-06 | 7.32 |
| ILMN_1689968 | PLEKHO2   | 0.29  | 6.96  | 5.74  | 1.05E-07 | 1.58E-06 | 7.32 |
| ILMN_1812557 | CDK5RAP3  | -0.43 | 9.10  | -5.74 | 1.05E-07 | 1.59E-06 | 7.32 |
| ILMN_1659027 | SLC2A1    | 0.54  | 8.70  | 5.74  | 1.06E-07 | 1.59E-06 | 7.31 |
| ILMN_1760682 | NA        | -0.26 | 7.28  | -5.74 | 1.06E-07 | 1.59E-06 | 7.31 |
| ILMN_2195482 | CACNB3    | -0.24 | 8.02  | -5.74 | 1.06E-07 | 1.60E-06 | 7.31 |
| ILMN_1801077 | PLIN2     | 0.42  | 7.67  | 5.74  | 1.07E-07 | 1.60E-06 | 7.30 |
| ILMN_1656691 | FBXO4     | 0.20  | 7.03  | 5.74  | 1.08E-07 | 1.61E-06 | 7.30 |
| ILMN_1732197 | MN1       | 0.19  | 6.80  | 5.74  | 1.08E-07 | 1.61E-06 | 7.30 |
| ILMN_2352293 | PRDM10    | -0.25 | 7.62  | -5.73 | 1.09E-07 | 1.63E-06 | 7.28 |
| ILMN_1788786 | GLRA2     | -0.56 | 6.93  | -5.73 | 1.09E-07 | 1.63E-06 | 7.28 |



|              |           |       |       |       |          |          |      |
|--------------|-----------|-------|-------|-------|----------|----------|------|
| ILMN_1719998 | MIR600HG  | -0.26 | 7.39  | -5.74 | 1.10E-07 | 1.64E-06 | 7.28 |
| ILMN_1680856 | MAMLD1    | 0.25  | 6.85  | 5.73  | 1.10E-07 | 1.64E-06 | 7.28 |
| ILMN_1691291 | PIGS      | -0.29 | 7.86  | -5.73 | 1.10E-07 | 1.65E-06 | 7.27 |
| ILMN_1784459 | MMP3      | 0.95  | 7.37  | 5.73  | 1.10E-07 | 1.65E-06 | 7.27 |
| ILMN_1801383 | SMG1      | -0.29 | 9.21  | -5.73 | 1.11E-07 | 1.65E-06 | 7.27 |
| ILMN_1660723 | RDH13     | -0.30 | 7.80  | -5.73 | 1.11E-07 | 1.65E-06 | 7.27 |
| ILMN_2391900 | SLC26A6   | -0.30 | 7.12  | -5.73 | 1.12E-07 | 1.67E-06 | 7.26 |
| ILMN_1762260 | C3        | 0.50  | 7.08  | 5.73  | 1.12E-07 | 1.67E-06 | 7.26 |
| ILMN_2401978 | STAT3     | 0.37  | 9.63  | 5.73  | 1.12E-07 | 1.68E-06 | 7.25 |
| ILMN_1712705 | RAB40C    | -0.35 | 9.44  | -5.73 | 1.13E-07 | 1.68E-06 | 7.25 |
| ILMN_1853876 | TMEM64    | 0.26  | 7.36  | 5.73  | 1.13E-07 | 1.68E-06 | 7.26 |
| ILMN_1661021 | NA        | -0.19 | 6.55  | -5.73 | 1.14E-07 | 1.69E-06 | 7.25 |
| ILMN_3244117 | STMN3     | 0.48  | 8.26  | 5.72  | 1.14E-07 | 1.70E-06 | 7.24 |
| ILMN_1707070 | PCOLCE    | 0.49  | 7.71  | 5.72  | 1.16E-07 | 1.72E-06 | 7.23 |
| ILMN_1685834 | AMPH      | 0.21  | 6.67  | 5.72  | 1.17E-07 | 1.74E-06 | 7.22 |
| ILMN_1703511 | PDZRN3    | 0.24  | 6.85  | 5.72  | 1.17E-07 | 1.74E-06 | 7.22 |
| ILMN_1742577 | GTPBP4    | 0.35  | 9.46  | 5.72  | 1.17E-07 | 1.74E-06 | 7.21 |
| ILMN_1661750 | VIL1      | -0.61 | 8.37  | -5.72 | 1.17E-07 | 1.74E-06 | 7.21 |
| ILMN_1698934 | CMTM7     | 0.62  | 8.95  | 5.72  | 1.18E-07 | 1.75E-06 | 7.21 |
| ILMN_1737011 | GOLM1     | -0.23 | 6.75  | -5.71 | 1.18E-07 | 1.76E-06 | 7.20 |
| ILMN_1726659 | THOP1     | -0.37 | 7.63  | -5.71 | 1.19E-07 | 1.76E-06 | 7.20 |
| ILMN_2070072 | RPS7      | 0.30  | 7.33  | 5.71  | 1.19E-07 | 1.77E-06 | 7.20 |
| ILMN_1799367 | TMX2      | -0.23 | 9.75  | -5.71 | 1.20E-07 | 1.78E-06 | 7.19 |
| ILMN_2348093 | ATP5J     | -0.28 | 11.70 | -5.71 | 1.20E-07 | 1.78E-06 | 7.19 |
| ILMN_1790106 | PLP1      | 0.22  | 7.27  | 5.71  | 1.21E-07 | 1.79E-06 | 7.19 |
| ILMN_1669502 | E2F3      | 0.28  | 8.25  | 5.71  | 1.21E-07 | 1.79E-06 | 7.18 |
| ILMN_1778924 | PDE1A     | 0.26  | 6.85  | 5.70  | 1.24E-07 | 1.83E-06 | 7.16 |
| ILMN_1727462 | ARSE      | -0.24 | 6.82  | -5.70 | 1.25E-07 | 1.85E-06 | 7.15 |
| ILMN_1768115 | TSPAN12   | -0.23 | 7.01  | -5.70 | 1.25E-07 | 1.85E-06 | 7.15 |
| ILMN_1707240 | PTBP2     | 0.30  | 7.84  | 5.70  | 1.26E-07 | 1.86E-06 | 7.14 |
| ILMN_1707077 | SORT1     | -0.34 | 8.63  | -5.70 | 1.27E-07 | 1.88E-06 | 7.13 |
| ILMN_1760027 | WAS       | 0.71  | 8.53  | 5.70  | 1.28E-07 | 1.89E-06 | 7.13 |
| ILMN_1717229 | AAED1     | 0.28  | 6.90  | 5.70  | 1.29E-07 | 1.90E-06 | 7.13 |
| ILMN_2152581 | STK38     | -0.31 | 9.03  | -5.69 | 1.30E-07 | 1.92E-06 | 7.11 |
| ILMN_1763487 | CTLA4     | 0.71  | 7.27  | 5.69  | 1.31E-07 | 1.93E-06 | 7.11 |
| ILMN_1696316 | CPT1A     | -0.28 | 7.15  | -5.69 | 1.32E-07 | 1.95E-06 | 7.10 |
| ILMN_1676844 | NR1D2     | -0.29 | 7.03  | -5.69 | 1.34E-07 | 1.98E-06 | 7.08 |
| ILMN_1768194 | BIRC2     | -0.25 | 7.87  | -5.69 | 1.35E-07 | 1.98E-06 | 7.08 |
| ILMN_1719286 | CTSA      | -0.50 | 9.10  | -5.69 | 1.35E-07 | 1.98E-06 | 7.08 |
| ILMN_1804822 | SRXN1     | 0.37  | 7.73  | 5.68  | 1.36E-07 | 2.00E-06 | 7.07 |
| ILMN_1768595 | DLG4      | 0.18  | 6.68  | 5.68  | 1.36E-07 | 2.01E-06 | 7.07 |
| ILMN_3235379 | CALB2     | 0.23  | 6.61  | 5.68  | 1.37E-07 | 2.01E-06 | 7.06 |
| ILMN_2318643 | TGIF1     | 0.34  | 8.02  | 5.68  | 1.37E-07 | 2.02E-06 | 7.06 |
| ILMN_1683059 | SIRT5     | -0.25 | 7.71  | -5.68 | 1.38E-07 | 2.03E-06 | 7.05 |
| ILMN_2371458 | ACKR3     | 0.56  | 7.20  | 5.68  | 1.38E-07 | 2.03E-06 | 7.05 |
| ILMN_1801905 | ATG4D     | -0.19 | 6.94  | -5.68 | 1.39E-07 | 2.04E-06 | 7.05 |
| ILMN_1685781 | C14orf142 | -0.30 | 8.25  | -5.68 | 1.39E-07 | 2.04E-06 | 7.05 |
| ILMN_2126239 | SMG5      | -0.27 | 8.31  | -5.68 | 1.39E-07 | 2.04E-06 | 7.05 |

|              |            |       |       |       |          |          |      |
|--------------|------------|-------|-------|-------|----------|----------|------|
| ILMN_1675186 | ME2        | -0.31 | 8.70  | -5.68 | 1.40E-07 | 2.05E-06 | 7.04 |
| ILMN_1759743 | SLC38A10   | 0.29  | 7.18  | 5.68  | 1.40E-07 | 2.05E-06 | 7.04 |
| ILMN_2195703 | PPARGC1B   | -0.42 | 7.29  | -5.68 | 1.41E-07 | 2.06E-06 | 7.04 |
| ILMN_1758173 | TMEM99     | -0.29 | 7.70  | -5.68 | 1.42E-07 | 2.07E-06 | 7.04 |
| ILMN_1688848 | TMEM44     | -0.37 | 8.03  | -5.67 | 1.42E-07 | 2.08E-06 | 7.02 |
| ILMN_1810560 | NUPR1      | -0.50 | 7.46  | -5.67 | 1.42E-07 | 2.08E-06 | 7.02 |
| ILMN_1743456 | ZCCHC14    | -0.28 | 7.97  | -5.67 | 1.43E-07 | 2.09E-06 | 7.02 |
| ILMN_1700695 | SLC44A1    | -0.37 | 11.69 | -5.67 | 1.43E-07 | 2.09E-06 | 7.02 |
| ILMN_1709683 | RASSF2     | 0.64  | 8.41  | 5.67  | 1.43E-07 | 2.09E-06 | 7.02 |
| ILMN_1695719 | AGO2       | 0.34  | 8.98  | 5.67  | 1.44E-07 | 2.10E-06 | 7.02 |
| ILMN_1736654 | PIP5K1B    | -0.26 | 7.29  | -5.67 | 1.44E-07 | 2.11E-06 | 7.01 |
| ILMN_1697817 | PANX1      | 0.24  | 6.87  | 5.67  | 1.45E-07 | 2.11E-06 | 7.01 |
| ILMN_1803673 | NA         | -0.27 | 7.15  | -5.67 | 1.45E-07 | 2.12E-06 | 7.01 |
| ILMN_1811682 | CLIP2      | -0.30 | 7.40  | -5.67 | 1.45E-07 | 2.12E-06 | 7.01 |
| ILMN_1750178 | NA         | -0.27 | 7.39  | -5.67 | 1.45E-07 | 2.12E-06 | 7.00 |
| ILMN_3179038 | LOC1001279 | -0.39 | 7.63  | -5.67 | 1.46E-07 | 2.13E-06 | 7.00 |
| ILMN_1727199 | KLC4       | -0.22 | 6.70  | -5.67 | 1.48E-07 | 2.15E-06 | 7.00 |
| ILMN_1777106 | LRRCS7     | -0.21 | 7.28  | -5.66 | 1.48E-07 | 2.15E-06 | 6.99 |
| ILMN_1671969 | UGP2       | -0.60 | 8.73  | -5.67 | 1.49E-07 | 2.17E-06 | 6.99 |
| ILMN_2338323 | CDC25B     | 0.47  | 8.18  | 5.66  | 1.50E-07 | 2.18E-06 | 6.98 |
| ILMN_1751904 | EDNRB      | 0.31  | 7.38  | 5.66  | 1.51E-07 | 2.20E-06 | 6.97 |
| ILMN_1682034 | HEY2       | 0.16  | 6.46  | 5.66  | 1.52E-07 | 2.20E-06 | 6.97 |
| ILMN_1750563 | CERCAM     | 0.23  | 6.71  | 5.66  | 1.52E-07 | 2.20E-06 | 6.96 |
| ILMN_1681283 | HIF1A      | 0.30  | 7.07  | 5.66  | 1.52E-07 | 2.20E-06 | 6.96 |
| ILMN_1656420 | CLUHP3     | -0.20 | 7.21  | -5.66 | 1.52E-07 | 2.21E-06 | 6.96 |
| ILMN_1774733 | SOCS1      | 0.24  | 6.73  | 5.66  | 1.52E-07 | 2.21E-06 | 6.96 |
| ILMN_1695404 | LY6E       | 0.45  | 8.29  | 5.66  | 1.53E-07 | 2.22E-06 | 6.96 |
| ILMN_1783448 | DYNC1L1I2  | -0.23 | 10.92 | -5.66 | 1.53E-07 | 2.22E-06 | 6.95 |
| ILMN_3224290 | NA         | 0.30  | 7.61  | 5.65  | 1.55E-07 | 2.24E-06 | 6.95 |
| ILMN_1707236 | HCCS       | -0.27 | 7.76  | -5.65 | 1.55E-07 | 2.24E-06 | 6.94 |
| ILMN_2330267 | ABCE1      | 0.32  | 8.33  | 5.65  | 1.56E-07 | 2.26E-06 | 6.94 |
| ILMN_1771019 | MTMR4      | -0.30 | 8.84  | -5.65 | 1.56E-07 | 2.26E-06 | 6.94 |
| ILMN_1776519 | RAP1GAP    | -0.59 | 9.59  | -5.65 | 1.56E-07 | 2.26E-06 | 6.94 |
| ILMN_2394381 | CLN3       | -0.34 | 7.56  | -5.65 | 1.56E-07 | 2.26E-06 | 6.93 |
| ILMN_2051972 | GPC3       | 0.16  | 6.42  | 5.65  | 1.57E-07 | 2.26E-06 | 6.93 |
| ILMN_1717138 | CLSTN1     | -0.23 | 6.96  | -5.65 | 1.57E-07 | 2.27E-06 | 6.93 |
| ILMN_2351611 | UBQLN1     | 0.32  | 7.80  | 5.65  | 1.57E-07 | 2.27E-06 | 6.93 |
| ILMN_2316236 | HOPX       | 0.46  | 7.27  | 5.65  | 1.59E-07 | 2.29E-06 | 6.92 |
| ILMN_2214144 | TWSG1      | 0.38  | 9.26  | 5.65  | 1.60E-07 | 2.31E-06 | 6.91 |
| ILMN_1693650 | FES        | 0.25  | 7.22  | 5.65  | 1.61E-07 | 2.32E-06 | 6.91 |
| ILMN_2203588 | MYL5       | -0.34 | 7.27  | -5.64 | 1.61E-07 | 2.32E-06 | 6.90 |
| ILMN_1703471 | ATF6       | 0.24  | 8.80  | 5.64  | 1.62E-07 | 2.33E-06 | 6.90 |
| ILMN_2393341 | LIAS       | -0.24 | 7.03  | -5.64 | 1.62E-07 | 2.34E-06 | 6.90 |
| ILMN_1791222 | GLYCTK     | -0.25 | 7.05  | -5.64 | 1.64E-07 | 2.37E-06 | 6.89 |
| ILMN_1806634 | NNT        | -0.30 | 9.07  | -5.64 | 1.65E-07 | 2.37E-06 | 6.89 |
| ILMN_2350114 | TRIM13     | -0.24 | 7.41  | -5.64 | 1.64E-07 | 2.37E-06 | 6.89 |
| ILMN_2305721 | POMT1      | -0.26 | 7.55  | -5.64 | 1.65E-07 | 2.37E-06 | 6.88 |
| ILMN_1745365 | PKNOX1     | -0.23 | 7.39  | -5.64 | 1.65E-07 | 2.37E-06 | 6.88 |

|              |          |       |       |       |          |          |      |
|--------------|----------|-------|-------|-------|----------|----------|------|
| ILMN_3300313 | P4HTM    | -0.55 | 8.12  | -5.64 | 1.65E-07 | 2.37E-06 | 6.88 |
| ILMN_2381476 | ATL1     | -0.28 | 7.39  | -5.64 | 1.66E-07 | 2.39E-06 | 6.87 |
| ILMN_2328813 | DMAP1    | -0.28 | 8.19  | -5.64 | 1.67E-07 | 2.39E-06 | 6.87 |
| ILMN_1751956 | MGST3    | -0.34 | 11.39 | -5.64 | 1.68E-07 | 2.41E-06 | 6.87 |
| ILMN_1705685 | MEIS1    | 0.33  | 7.58  | 5.63  | 1.69E-07 | 2.42E-06 | 6.86 |
| ILMN_1693891 | MOGAT2   | -0.23 | 6.83  | -5.63 | 1.69E-07 | 2.43E-06 | 6.86 |
| ILMN_2221784 | LRRC75A  | -0.30 | 7.12  | -5.63 | 1.70E-07 | 2.43E-06 | 6.86 |
| ILMN_1661337 | SRM      | 0.29  | 7.26  | 5.63  | 1.70E-07 | 2.43E-06 | 6.85 |
| ILMN_1740671 | ATOH1    | -0.34 | 7.03  | -5.63 | 1.70E-07 | 2.43E-06 | 6.85 |
| ILMN_2188521 | NECTIN3  | -0.51 | 9.56  | -5.63 | 1.71E-07 | 2.45E-06 | 6.85 |
| ILMN_3224926 | RBM47    | -0.40 | 11.04 | -5.63 | 1.71E-07 | 2.45E-06 | 6.85 |
| ILMN_1694603 | SMARCC1  | 0.23  | 8.66  | 5.63  | 1.72E-07 | 2.46E-06 | 6.84 |
| ILMN_1803772 | POLD4    | -0.27 | 7.67  | -5.63 | 1.72E-07 | 2.46E-06 | 6.84 |
| ILMN_1901934 | NA       | -0.19 | 6.89  | -5.63 | 1.72E-07 | 2.46E-06 | 6.84 |
| ILMN_1665865 | IGFBP4   | 0.47  | 9.10  | 5.64  | 1.74E-07 | 2.49E-06 | 6.84 |
| ILMN_1775235 | AFF3     | 0.36  | 7.04  | 5.63  | 1.75E-07 | 2.49E-06 | 6.83 |
| ILMN_1806106 | GNL3     | 0.31  | 8.83  | 5.63  | 1.75E-07 | 2.50E-06 | 6.83 |
| ILMN_2215545 | CMSS1    | 0.36  | 7.68  | 5.63  | 1.76E-07 | 2.51E-06 | 6.82 |
| ILMN_1750181 | TESC     | 0.41  | 7.07  | 5.62  | 1.76E-07 | 2.51E-06 | 6.82 |
| ILMN_1796629 | EDNRA    | 0.26  | 6.82  | 5.62  | 1.76E-07 | 2.51E-06 | 6.82 |
| ILMN_2115340 | NA       | -0.20 | 6.82  | -5.62 | 1.76E-07 | 2.51E-06 | 6.82 |
| ILMN_2289924 | TRAK1    | -0.31 | 8.87  | -5.62 | 1.77E-07 | 2.53E-06 | 6.81 |
| ILMN_1814726 | SCARB2   | -0.22 | 11.52 | -5.62 | 1.78E-07 | 2.54E-06 | 6.81 |
| ILMN_1726448 | MMP1     | 0.56  | 6.90  | 5.62  | 1.79E-07 | 2.55E-06 | 6.80 |
| ILMN_2254635 | ITGAX    | 0.54  | 7.09  | 5.62  | 1.81E-07 | 2.57E-06 | 6.79 |
| ILMN_2205896 | MEIS3P1  | 0.30  | 8.11  | 5.62  | 1.82E-07 | 2.59E-06 | 6.79 |
| ILMN_1773885 | DMAP1    | -0.34 | 8.43  | -5.62 | 1.82E-07 | 2.59E-06 | 6.79 |
| ILMN_1769013 | ASGR1    | 0.21  | 6.73  | 5.62  | 1.85E-07 | 2.63E-06 | 6.78 |
| ILMN_1854469 | NA       | 0.34  | 7.53  | 5.61  | 1.86E-07 | 2.64E-06 | 6.77 |
| ILMN_1741712 | MS4A4A   | 0.15  | 6.40  | 5.61  | 1.86E-07 | 2.64E-06 | 6.77 |
| ILMN_1728467 | GHITM    | -0.31 | 11.82 | -5.62 | 1.87E-07 | 2.65E-06 | 6.77 |
| ILMN_1800276 | RCN1     | 0.34  | 10.03 | 5.61  | 1.88E-07 | 2.66E-06 | 6.76 |
| ILMN_2132809 | ARHGEF10 | 0.29  | 7.91  | 5.61  | 1.88E-07 | 2.67E-06 | 6.75 |
| ILMN_1703075 | PYY      | -1.13 | 8.04  | -5.61 | 1.89E-07 | 2.67E-06 | 6.75 |
| ILMN_1694174 | TRIM68   | -0.22 | 7.79  | -5.61 | 1.89E-07 | 2.68E-06 | 6.75 |
| ILMN_1660343 | NA       | -0.25 | 7.16  | -5.61 | 1.90E-07 | 2.69E-06 | 6.75 |
| ILMN_2233783 | CD38     | 0.42  | 7.08  | 5.61  | 1.91E-07 | 2.70E-06 | 6.75 |
| ILMN_1655444 | NA       | -0.40 | 9.69  | -5.60 | 1.93E-07 | 2.73E-06 | 6.73 |
| ILMN_1809928 | COL6A2   | 0.32  | 7.20  | 5.60  | 1.94E-07 | 2.75E-06 | 6.73 |
| ILMN_1663484 | NA       | -0.16 | 6.92  | -5.60 | 1.96E-07 | 2.77E-06 | 6.72 |
| ILMN_1757882 | PPP1R16A | -0.45 | 8.50  | -5.60 | 1.97E-07 | 2.78E-06 | 6.71 |
| ILMN_1666739 | RBM15    | 0.28  | 8.22  | 5.60  | 1.97E-07 | 2.79E-06 | 6.71 |
| ILMN_1773312 | PATJ     | -0.19 | 6.80  | -5.60 | 1.98E-07 | 2.79E-06 | 6.71 |
| ILMN_1684585 | ACSL1    | 0.53  | 7.58  | 5.60  | 1.99E-07 | 2.81E-06 | 6.70 |
| ILMN_1711818 | PIWIL2   | -0.15 | 6.52  | -5.60 | 2.00E-07 | 2.82E-06 | 6.70 |
| ILMN_1713088 | MSI2     | 0.20  | 6.60  | 5.59  | 2.01E-07 | 2.84E-06 | 6.69 |
| ILMN_1729374 | ETFB     | -0.49 | 9.17  | -5.59 | 2.02E-07 | 2.84E-06 | 6.69 |
| ILMN_2195914 | GGH      | -0.37 | 7.18  | -5.59 | 2.02E-07 | 2.85E-06 | 6.69 |

|              |            |       |       |       |          |          |      |
|--------------|------------|-------|-------|-------|----------|----------|------|
| ILMN_1654072 | CX3CL1     | 0.28  | 7.30  | 5.59  | 2.05E-07 | 2.89E-06 | 6.68 |
| ILMN_2169383 | REG4       | 1.91  | 10.45 | 5.59  | 2.07E-07 | 2.91E-06 | 6.66 |
| ILMN_1705876 | NAP1L1     | 0.24  | 7.02  | 5.59  | 2.08E-07 | 2.92E-06 | 6.66 |
| ILMN_2122420 | HMGCL      | -0.30 | 7.68  | -5.59 | 2.09E-07 | 2.93E-06 | 6.66 |
| ILMN_1657446 | NTPCR      | -0.31 | 8.03  | -5.59 | 2.09E-07 | 2.94E-06 | 6.65 |
| ILMN_1698803 | ZAK        | 0.28  | 6.70  | 5.58  | 2.10E-07 | 2.95E-06 | 6.65 |
| ILMN_1673261 | EPS8L3     | -0.21 | 6.87  | -5.58 | 2.10E-07 | 2.95E-06 | 6.65 |
| ILMN_2137464 | DVL3       | 0.22  | 7.93  | 5.58  | 2.10E-07 | 2.95E-06 | 6.65 |
| ILMN_2041101 | ANXA2P1    | 0.57  | 10.14 | 5.58  | 2.11E-07 | 2.96E-06 | 6.64 |
| ILMN_1671106 | GJA4       | 0.28  | 6.72  | 5.58  | 2.12E-07 | 2.98E-06 | 6.64 |
| ILMN_1752451 | CTSH       | 0.35  | 7.14  | 5.58  | 2.14E-07 | 3.00E-06 | 6.63 |
| ILMN_1768814 | KLHL6      | 0.51  | 7.19  | 5.58  | 2.14E-07 | 3.00E-06 | 6.63 |
| ILMN_1728059 | NA         | 0.18  | 6.85  | 5.58  | 2.16E-07 | 3.03E-06 | 6.62 |
| ILMN_1758672 | FAM107B    | 0.46  | 9.48  | 5.58  | 2.17E-07 | 3.04E-06 | 6.62 |
| ILMN_1691736 | ST6GALNACt | -0.66 | 9.48  | -5.57 | 2.19E-07 | 3.06E-06 | 6.61 |
| ILMN_1679391 | MAMDC2     | 0.69  | 8.08  | 5.58  | 2.19E-07 | 3.07E-06 | 6.61 |
| ILMN_1796461 | PRSS8      | -0.58 | 10.69 | -5.57 | 2.19E-07 | 3.07E-06 | 6.61 |
| ILMN_1661197 | CLCF1      | 0.46  | 7.02  | 5.58  | 2.20E-07 | 3.08E-06 | 6.61 |
| ILMN_1784749 | GAS6       | -0.41 | 9.12  | -5.57 | 2.20E-07 | 3.08E-06 | 6.60 |
| ILMN_2330845 | NSF        | -0.22 | 8.15  | -5.57 | 2.21E-07 | 3.08E-06 | 6.60 |
| ILMN_1776154 | COG3       | -0.25 | 8.02  | -5.57 | 2.22E-07 | 3.10E-06 | 6.60 |
| ILMN_2204754 | TMX4       | 0.28  | 7.93  | 5.57  | 2.22E-07 | 3.10E-06 | 6.60 |
| ILMN_1669046 | FOXQ1      | 0.77  | 7.07  | 5.57  | 2.23E-07 | 3.11E-06 | 6.59 |
| ILMN_2405602 | OSBPL1A    | -0.42 | 8.85  | -5.57 | 2.23E-07 | 3.12E-06 | 6.59 |
| ILMN_1741755 | TRIM29     | 0.27  | 6.57  | 5.57  | 2.24E-07 | 3.13E-06 | 6.59 |
| ILMN_1661917 | RPL10      | 0.31  | 12.78 | 5.57  | 2.27E-07 | 3.16E-06 | 6.58 |
| ILMN_1719627 | SLC27A3    | -0.29 | 8.52  | -5.57 | 2.27E-07 | 3.16E-06 | 6.57 |
| ILMN_1701032 | TFPI       | 0.18  | 6.43  | 5.57  | 2.27E-07 | 3.17E-06 | 6.57 |
| ILMN_1742069 | ZSWIM5     | -0.29 | 7.43  | -5.57 | 2.27E-07 | 3.17E-06 | 6.57 |
| ILMN_2385278 | DCAF4      | -0.22 | 7.29  | -5.57 | 2.30E-07 | 3.21E-06 | 6.56 |
| ILMN_1716488 | PACS1      | 0.22  | 6.85  | 5.56  | 2.34E-07 | 3.25E-06 | 6.55 |
| ILMN_3307648 | CS         | -0.24 | 10.57 | -5.56 | 2.34E-07 | 3.25E-06 | 6.55 |
| ILMN_1657708 | MGLL       | -0.39 | 8.43  | -5.56 | 2.35E-07 | 3.27E-06 | 6.54 |
| ILMN_1740165 | NRDE2      | -0.25 | 8.41  | -5.56 | 2.35E-07 | 3.27E-06 | 6.54 |
| ILMN_1801476 | CDS1       | -0.55 | 9.29  | -5.56 | 2.37E-07 | 3.30E-06 | 6.54 |
| ILMN_2143250 | FAR1       | -0.36 | 8.38  | -5.56 | 2.39E-07 | 3.32E-06 | 6.53 |
| ILMN_1661770 | KDM4C      | -0.15 | 6.89  | -5.56 | 2.40E-07 | 3.34E-06 | 6.52 |
| ILMN_1706413 | RRNAD1     | -0.23 | 7.34  | -5.55 | 2.41E-07 | 3.35E-06 | 6.52 |
| ILMN_2212878 | ESM1       | -0.19 | 6.79  | -5.55 | 2.42E-07 | 3.36E-06 | 6.51 |
| ILMN_1801109 | NAA16      | 0.18  | 7.07  | 5.55  | 2.43E-07 | 3.37E-06 | 6.51 |
| ILMN_1718977 | GADD45B    | 0.47  | 7.26  | 5.55  | 2.44E-07 | 3.38E-06 | 6.51 |
| ILMN_1803856 | DKFZP586I1 | -0.22 | 7.46  | -5.55 | 2.44E-07 | 3.38E-06 | 6.51 |
| ILMN_1700822 | DPP3       | -0.22 | 7.40  | -5.55 | 2.44E-07 | 3.38E-06 | 6.50 |
| ILMN_1651987 | CCDC167    | 0.31  | 7.27  | 5.55  | 2.47E-07 | 3.42E-06 | 6.49 |
| ILMN_2055477 | EXOSC7     | 0.23  | 7.79  | 5.55  | 2.48E-07 | 3.43E-06 | 6.49 |
| ILMN_2163306 | FAM120A    | -0.23 | 10.61 | -5.54 | 2.49E-07 | 3.45E-06 | 6.48 |
| ILMN_3244390 | ASAP1-IT1  | 0.21  | 6.83  | 5.54  | 2.50E-07 | 3.45E-06 | 6.48 |
| ILMN_1731374 | CPE        | 0.45  | 8.44  | 5.54  | 2.50E-07 | 3.46E-06 | 6.48 |

|              |            |       |       |       |          |          |      |
|--------------|------------|-------|-------|-------|----------|----------|------|
| ILMN_1678004 | TMEM41B    | -0.21 | 9.36  | -5.54 | 2.52E-07 | 3.48E-06 | 6.47 |
| ILMN_1699022 | ENDOD1     | -0.50 | 8.43  | -5.54 | 2.52E-07 | 3.48E-06 | 6.47 |
| ILMN_1720114 | GMNN       | -0.34 | 7.81  | -5.54 | 2.53E-07 | 3.49E-06 | 6.47 |
| ILMN_2136446 | CTNNAL1    | 0.34  | 7.70  | 5.54  | 2.53E-07 | 3.49E-06 | 6.47 |
| ILMN_3248263 | CCDC93     | -0.25 | 8.85  | -5.54 | 2.55E-07 | 3.52E-06 | 6.46 |
| ILMN_1659106 | PHLDA3     | 0.18  | 6.64  | 5.54  | 2.57E-07 | 3.54E-06 | 6.46 |
| ILMN_3234884 | KIF22      | -0.41 | 8.55  | -5.54 | 2.59E-07 | 3.57E-06 | 6.45 |
| ILMN_1736021 | PRPF4B     | -0.25 | 7.79  | -5.54 | 2.60E-07 | 3.58E-06 | 6.44 |
| ILMN_1698578 | LOC1005069 | -0.17 | 6.60  | -5.53 | 2.61E-07 | 3.59E-06 | 6.44 |
| ILMN_1715189 | LHX6       | 0.22  | 6.78  | 5.53  | 2.62E-07 | 3.61E-06 | 6.43 |
| ILMN_1676449 | SLIT2      | 0.29  | 7.14  | 5.53  | 2.63E-07 | 3.62E-06 | 6.43 |
| ILMN_1671891 | PID1       | -0.43 | 8.11  | -5.53 | 2.64E-07 | 3.63E-06 | 6.43 |
| ILMN_1653793 | PDPK1      | -0.24 | 7.34  | -5.53 | 2.67E-07 | 3.67E-06 | 6.42 |
| ILMN_1657475 | GALT       | -0.29 | 7.92  | -5.53 | 2.67E-07 | 3.67E-06 | 6.42 |
| ILMN_1791728 | SLC25A25   | 0.35  | 8.50  | 5.53  | 2.69E-07 | 3.70E-06 | 6.41 |
| ILMN_1667429 | SLC25A20   | -0.27 | 7.18  | -5.53 | 2.70E-07 | 3.72E-06 | 6.40 |
| ILMN_1760741 | NDUFA9     | -0.33 | 9.34  | -5.52 | 2.72E-07 | 3.73E-06 | 6.40 |
| ILMN_1680139 | MAFF       | 0.36  | 7.05  | 5.53  | 2.73E-07 | 3.75E-06 | 6.40 |
| ILMN_2413833 | TOX3       | -0.39 | 7.65  | -5.52 | 2.74E-07 | 3.75E-06 | 6.39 |
| ILMN_1815733 | EIF5       | -0.24 | 8.74  | -5.52 | 2.75E-07 | 3.76E-06 | 6.39 |
| ILMN_1693009 | FGL2       | 0.48  | 9.21  | 5.52  | 2.76E-07 | 3.78E-06 | 6.39 |
| ILMN_1684887 | SAMSN1     | 0.61  | 7.38  | 5.52  | 2.79E-07 | 3.82E-06 | 6.38 |
| ILMN_1702231 | C1orf54    | 0.43  | 8.28  | 5.52  | 2.79E-07 | 3.82E-06 | 6.38 |
| ILMN_1772821 | KIAA1671   | -0.34 | 9.68  | -5.52 | 2.79E-07 | 3.82E-06 | 6.38 |
| ILMN_2389155 | UGP2       | -0.42 | 8.85  | -5.52 | 2.79E-07 | 3.82E-06 | 6.37 |
| ILMN_2175912 | ITGB2      | 0.91  | 10.01 | 5.52  | 2.82E-07 | 3.85E-06 | 6.37 |
| ILMN_1683682 | DAGLA      | -0.23 | 6.97  | -5.52 | 2.82E-07 | 3.86E-06 | 6.36 |
| ILMN_1779674 | PTPRG      | 0.18  | 6.83  | 5.52  | 2.82E-07 | 3.86E-06 | 6.36 |
| ILMN_1743747 | RUSC1      | -0.33 | 9.80  | -5.52 | 2.83E-07 | 3.86E-06 | 6.36 |
| ILMN_2401253 | FAM13A     | -0.20 | 6.96  | -5.52 | 2.83E-07 | 3.86E-06 | 6.36 |
| ILMN_1733851 | DACT3      | 0.35  | 7.20  | 5.51  | 2.84E-07 | 3.88E-06 | 6.36 |
| ILMN_1796455 | RYR3       | 0.24  | 6.63  | 5.51  | 2.84E-07 | 3.88E-06 | 6.36 |
| ILMN_1714709 | OLFM1      | 0.30  | 7.12  | 5.51  | 2.86E-07 | 3.90E-06 | 6.35 |
| ILMN_1761788 | MOXD1      | 0.20  | 6.62  | 5.51  | 2.86E-07 | 3.91E-06 | 6.35 |
| ILMN_1703949 | KPNB1      | 0.25  | 10.46 | 5.52  | 2.88E-07 | 3.92E-06 | 6.35 |
| ILMN_1660810 | TTC17      | -0.24 | 8.37  | -5.51 | 2.88E-07 | 3.93E-06 | 6.34 |
| ILMN_1737514 | KYNU       | 0.29  | 6.77  | 5.51  | 2.89E-07 | 3.94E-06 | 6.34 |
| ILMN_1678968 | GEM        | 0.34  | 6.75  | 5.51  | 2.90E-07 | 3.95E-06 | 6.34 |
| ILMN_1663132 | ADCK2      | -0.27 | 8.10  | -5.51 | 2.91E-07 | 3.96E-06 | 6.33 |
| ILMN_1687533 | SEMA4D     | 0.50  | 8.39  | 5.51  | 2.91E-07 | 3.96E-06 | 6.33 |
| ILMN_1774265 | C2orf82    | -0.48 | 7.98  | -5.51 | 2.92E-07 | 3.97E-06 | 6.33 |
| ILMN_2135258 | RAPGEF3    | 0.14  | 6.49  | 5.51  | 2.92E-07 | 3.97E-06 | 6.33 |
| ILMN_1726496 | NA         | 0.21  | 6.93  | 5.51  | 2.95E-07 | 4.01E-06 | 6.32 |
| ILMN_1680465 | ARL5B      | 0.26  | 7.08  | 5.51  | 2.97E-07 | 4.03E-06 | 6.32 |
| ILMN_1689378 | NOCT       | 0.25  | 7.17  | 5.50  | 2.99E-07 | 4.06E-06 | 6.31 |
| ILMN_1756439 | SCRN1      | 0.32  | 7.59  | 5.50  | 3.02E-07 | 4.10E-06 | 6.30 |
| ILMN_1704286 | FXYD5      | 0.54  | 8.37  | 5.50  | 3.02E-07 | 4.10E-06 | 6.30 |
| ILMN_1677824 | NA         | -0.24 | 7.34  | -5.50 | 3.05E-07 | 4.14E-06 | 6.29 |

|              |          |       |       |       |          |          |      |
|--------------|----------|-------|-------|-------|----------|----------|------|
| ILMN_1701731 | AKR1B1   | 0.45  | 8.61  | 5.50  | 3.06E-07 | 4.14E-06 | 6.29 |
| ILMN_2054607 | CYP4V2   | -0.43 | 9.05  | -5.50 | 3.06E-07 | 4.15E-06 | 6.29 |
| ILMN_1657766 | TRIM29   | 0.32  | 6.56  | 5.50  | 3.07E-07 | 4.15E-06 | 6.28 |
| ILMN_1678409 | NA       | -0.33 | 7.08  | -5.50 | 3.07E-07 | 4.16E-06 | 6.28 |
| ILMN_2133534 | NA       | -0.27 | 7.54  | -5.50 | 3.07E-07 | 4.16E-06 | 6.28 |
| ILMN_2337655 | WARS     | 0.59  | 9.43  | 5.50  | 3.07E-07 | 4.16E-06 | 6.28 |
| ILMN_1728349 | TMEM63B  | -0.24 | 7.18  | -5.50 | 3.08E-07 | 4.16E-06 | 6.28 |
| ILMN_1777721 | MAPRE1   | 0.27  | 10.19 | 5.49  | 3.09E-07 | 4.18E-06 | 6.27 |
| ILMN_1814194 | TCF4     | 0.39  | 7.95  | 5.50  | 3.09E-07 | 4.18E-06 | 6.27 |
| ILMN_1663605 | RNF123   | -0.16 | 7.52  | -5.49 | 3.11E-07 | 4.20E-06 | 6.27 |
| ILMN_2359800 | MS4A6A   | 0.82  | 8.99  | 5.49  | 3.11E-07 | 4.21E-06 | 6.27 |
| ILMN_1664051 | SEC22C   | 0.22  | 6.90  | 5.49  | 3.12E-07 | 4.21E-06 | 6.27 |
| ILMN_1740505 | SGMS1    | 0.16  | 6.63  | 5.49  | 3.14E-07 | 4.23E-06 | 6.26 |
| ILMN_1805474 | C1orf131 | -0.21 | 8.71  | -5.49 | 3.14E-07 | 4.23E-06 | 6.26 |
| ILMN_1681325 | CPTP     | -0.20 | 7.00  | -5.49 | 3.14E-07 | 4.24E-06 | 6.26 |
| ILMN_1694034 | LGALS4   | -0.61 | 12.95 | -5.49 | 3.14E-07 | 4.24E-06 | 6.26 |
| ILMN_1757660 | CAPS     | -0.21 | 7.12  | -5.49 | 3.15E-07 | 4.25E-06 | 6.26 |
| ILMN_1784283 | USH1C    | -0.36 | 7.89  | -5.49 | 3.16E-07 | 4.26E-06 | 6.25 |
| ILMN_1754865 | PABPC4   | 0.34  | 8.63  | 5.49  | 3.17E-07 | 4.27E-06 | 6.25 |
| ILMN_2363621 | RBBP8    | 0.31  | 8.46  | 5.49  | 3.18E-07 | 4.27E-06 | 6.25 |
| ILMN_1783285 | CTPS1    | 0.36  | 7.50  | 5.49  | 3.19E-07 | 4.29E-06 | 6.24 |
| ILMN_1683774 | IL2RA    | 0.32  | 6.75  | 5.49  | 3.20E-07 | 4.31E-06 | 6.24 |
| ILMN_1769758 | FANCA    | -0.35 | 6.78  | -5.49 | 3.22E-07 | 4.33E-06 | 6.24 |
| ILMN_3247018 | SNORA67  | 0.29  | 7.72  | 5.48  | 3.24E-07 | 4.35E-06 | 6.23 |
| ILMN_1765684 | C19orf70 | -0.29 | 9.69  | -5.48 | 3.24E-07 | 4.35E-06 | 6.23 |
| ILMN_1708110 | TMEM144  | -0.38 | 8.47  | -5.48 | 3.24E-07 | 4.36E-06 | 6.23 |
| ILMN_1693259 | PDCD6IP  | -0.31 | 9.10  | -5.48 | 3.25E-07 | 4.36E-06 | 6.23 |
| ILMN_1751773 | POLD3    | 0.23  | 7.24  | 5.48  | 3.26E-07 | 4.38E-06 | 6.22 |
| ILMN_1706706 | DCAF7    | 0.23  | 7.46  | 5.48  | 3.29E-07 | 4.41E-06 | 6.21 |
| ILMN_2131177 | GUCY1A3  | 0.31  | 7.02  | 5.48  | 3.32E-07 | 4.44E-06 | 6.21 |
| ILMN_1789909 | TBC1D9B  | -0.19 | 7.40  | -5.48 | 3.32E-07 | 4.44E-06 | 6.21 |
| ILMN_1770940 | CDH1     | -0.49 | 11.41 | -5.48 | 3.34E-07 | 4.47E-06 | 6.20 |
| ILMN_1683178 | JAK2     | 0.20  | 7.15  | 5.48  | 3.35E-07 | 4.48E-06 | 6.20 |
| ILMN_1779241 | CRYM     | -0.18 | 6.59  | -5.48 | 3.37E-07 | 4.51E-06 | 6.19 |
| ILMN_1796165 | GLRX5    | -0.26 | 10.96 | -5.48 | 3.37E-07 | 4.51E-06 | 6.19 |
| ILMN_2359945 | CES1     | 0.37  | 7.10  | 5.48  | 3.37E-07 | 4.51E-06 | 6.19 |
| ILMN_1711810 | PNKD     | -0.25 | 7.05  | -5.47 | 3.38E-07 | 4.51E-06 | 6.19 |
| ILMN_2380688 | B4GALT4  | -0.22 | 7.20  | -5.48 | 3.40E-07 | 4.54E-06 | 6.19 |
| ILMN_1874689 | NA       | -0.21 | 6.84  | -5.47 | 3.42E-07 | 4.57E-06 | 6.18 |
| ILMN_1675266 | NAGPA    | -0.28 | 7.68  | -5.47 | 3.44E-07 | 4.59E-06 | 6.17 |
| ILMN_1713394 | RPS16    | 0.23  | 13.16 | 5.47  | 3.44E-07 | 4.60E-06 | 6.17 |
| ILMN_1795715 | DPYD     | 0.24  | 7.01  | 5.47  | 3.47E-07 | 4.63E-06 | 6.16 |
| ILMN_1767253 | RRP12    | 0.25  | 7.14  | 5.47  | 3.50E-07 | 4.66E-06 | 6.16 |
| ILMN_1678692 | MPRIP    | 0.22  | 7.13  | 5.47  | 3.50E-07 | 4.67E-06 | 6.16 |
| ILMN_1733690 | AKAP7    | -0.43 | 8.77  | -5.47 | 3.50E-07 | 4.67E-06 | 6.15 |
| ILMN_1673773 | GALNT18  | 0.21  | 6.84  | 5.47  | 3.55E-07 | 4.73E-06 | 6.15 |
| ILMN_3251361 | NA       | -0.15 | 6.71  | -5.46 | 3.55E-07 | 4.73E-06 | 6.14 |
| ILMN_1760855 | OCRL     | -0.26 | 8.44  | -5.46 | 3.56E-07 | 4.73E-06 | 6.14 |

|              |          |       |       |       |          |          |      |
|--------------|----------|-------|-------|-------|----------|----------|------|
| ILMN_2154671 | COX6B1   | -0.21 | 11.58 | -5.46 | 3.62E-07 | 4.82E-06 | 6.12 |
| ILMN_1691276 | CXXC1    | -0.27 | 9.32  | -5.46 | 3.62E-07 | 4.82E-06 | 6.12 |
| ILMN_1812067 | RER1     | -0.24 | 7.86  | -5.46 | 3.63E-07 | 4.82E-06 | 6.12 |
| ILMN_1811313 | SLIT3    | 0.30  | 6.84  | 5.46  | 3.65E-07 | 4.86E-06 | 6.11 |
| ILMN_1703926 | PTGER2   | 0.32  | 7.37  | 5.46  | 3.67E-07 | 4.87E-06 | 6.12 |
| ILMN_3251545 | CHMP5    | -0.30 | 10.12 | -5.46 | 3.67E-07 | 4.88E-06 | 6.11 |
| ILMN_1688479 | LRRC42   | 0.21  | 8.34  | 5.45  | 3.68E-07 | 4.88E-06 | 6.11 |
| ILMN_1810838 | MTDH     | 0.21  | 9.10  | 5.46  | 3.69E-07 | 4.90E-06 | 6.11 |
| ILMN_1768391 | ARL4C    | 0.18  | 6.59  | 5.46  | 3.70E-07 | 4.91E-06 | 6.11 |
| ILMN_1665738 | FLI1     | 0.30  | 7.33  | 5.45  | 3.73E-07 | 4.95E-06 | 6.09 |
| ILMN_1728107 | GNG7     | 0.31  | 7.32  | 5.45  | 3.73E-07 | 4.95E-06 | 6.09 |
| ILMN_1804479 | MRPL18   | -0.23 | 9.37  | -5.45 | 3.73E-07 | 4.95E-06 | 6.09 |
| ILMN_2408851 | ARHGAP30 | 0.31  | 7.08  | 5.45  | 3.74E-07 | 4.95E-06 | 6.09 |
| ILMN_1666967 | MPC1     | -0.34 | 8.63  | -5.45 | 3.74E-07 | 4.95E-06 | 6.09 |
| ILMN_1747016 | CEP55    | 0.42  | 7.48  | 5.45  | 3.76E-07 | 4.98E-06 | 6.09 |
| ILMN_2205999 | OSMR     | 0.23  | 6.66  | 5.45  | 3.77E-07 | 4.99E-06 | 6.08 |
| ILMN_3228585 | NA       | -0.29 | 9.42  | -5.45 | 3.78E-07 | 4.99E-06 | 6.08 |
| ILMN_2184556 | SLC4A4   | -0.40 | 7.31  | -5.45 | 3.78E-07 | 5.00E-06 | 6.08 |
| ILMN_1740493 | TRAF5    | 0.30  | 8.02  | 5.45  | 3.79E-07 | 5.00E-06 | 6.08 |
| ILMN_1746012 | MBD6     | -0.34 | 8.98  | -5.45 | 3.79E-07 | 5.00E-06 | 6.08 |
| ILMN_2413158 | PODXL    | 0.38  | 8.27  | 5.45  | 3.80E-07 | 5.02E-06 | 6.08 |
| ILMN_1749636 | DNAJC22  | -0.31 | 7.28  | -5.45 | 3.81E-07 | 5.02E-06 | 6.07 |
| ILMN_1696463 | SPI1     | 0.30  | 7.09  | 5.45  | 3.82E-07 | 5.03E-06 | 6.07 |
| ILMN_1805800 | RAB5A    | 0.32  | 8.48  | 5.45  | 3.83E-07 | 5.06E-06 | 6.07 |
| ILMN_1804601 | NA       | 1.77  | 9.89  | 5.44  | 3.88E-07 | 5.11E-06 | 6.06 |
| ILMN_3241021 | RNY4     | 0.51  | 7.24  | 5.44  | 3.91E-07 | 5.16E-06 | 6.05 |
| ILMN_1754279 | FBXW7    | 0.28  | 7.94  | 5.44  | 3.92E-07 | 5.17E-06 | 6.05 |
| ILMN_1657760 | SYT17    | -0.20 | 6.66  | -5.44 | 3.93E-07 | 5.17E-06 | 6.04 |
| ILMN_1685170 | ANXA11   | -0.24 | 8.91  | -5.44 | 3.93E-07 | 5.17E-06 | 6.04 |
| ILMN_1652749 | ERF      | 0.20  | 6.94  | 5.44  | 3.94E-07 | 5.18E-06 | 6.04 |
| ILMN_1800317 | WNT5A    | 0.44  | 7.19  | 5.44  | 3.94E-07 | 5.18E-06 | 6.05 |
| ILMN_2129505 | CYB561A3 | -0.33 | 8.08  | -5.44 | 3.94E-07 | 5.18E-06 | 6.04 |
| ILMN_2383489 | CDK5RAP3 | -0.53 | 8.94  | -5.44 | 3.94E-07 | 5.18E-06 | 6.04 |
| ILMN_2122103 | ETS1     | 0.64  | 8.50  | 5.44  | 3.95E-07 | 5.19E-06 | 6.04 |
| ILMN_1779886 | TBC1D14  | -0.22 | 8.72  | -5.44 | 3.95E-07 | 5.19E-06 | 6.04 |
| ILMN_1803855 | FAIM2    | 0.14  | 6.57  | 5.44  | 3.96E-07 | 5.20E-06 | 6.04 |
| ILMN_2163723 | KRT7     | 0.24  | 6.48  | 5.44  | 3.96E-07 | 5.20E-06 | 6.04 |
| ILMN_1766916 | RPAP3    | 0.19  | 7.50  | 5.44  | 3.99E-07 | 5.23E-06 | 6.03 |
| ILMN_1803211 | FBXO2    | -0.18 | 6.87  | -5.44 | 4.00E-07 | 5.24E-06 | 6.03 |
| ILMN_1658182 | MEX3C    | 0.26  | 7.84  | 5.43  | 4.02E-07 | 5.27E-06 | 6.02 |
| ILMN_1674620 | SGCE     | 0.44  | 8.39  | 5.44  | 4.02E-07 | 5.27E-06 | 6.03 |
| ILMN_2382717 | OPN3     | -0.21 | 6.74  | -5.43 | 4.04E-07 | 5.29E-06 | 6.02 |
| ILMN_1772521 | MTHFD1L  | 0.34  | 7.18  | 5.43  | 4.06E-07 | 5.32E-06 | 6.01 |
| ILMN_1746704 | TRIM8    | 0.23  | 8.96  | 5.43  | 4.07E-07 | 5.32E-06 | 6.01 |
| ILMN_1803483 | KIAA2013 | -0.29 | 8.82  | -5.43 | 4.07E-07 | 5.33E-06 | 6.01 |
| ILMN_1666819 | PHLDB1   | -0.35 | 8.56  | -5.44 | 4.08E-07 | 5.33E-06 | 6.01 |
| ILMN_1751120 | HIST1H4H | -0.25 | 6.74  | -5.43 | 4.08E-07 | 5.34E-06 | 6.01 |
| ILMN_1705035 | FBXL7    | 0.18  | 6.65  | 5.43  | 4.09E-07 | 5.34E-06 | 6.01 |

|              |            |       |       |       |          |          |      |
|--------------|------------|-------|-------|-------|----------|----------|------|
| ILMN_2206272 | D2HGDH     | -0.59 | 9.34  | -5.43 | 4.10E-07 | 5.35E-06 | 6.00 |
| ILMN_1717337 | 7-Mar      | 0.27  | 9.44  | 5.43  | 4.10E-07 | 5.36E-06 | 6.00 |
| ILMN_1737972 | TSPYL5     | 0.21  | 6.65  | 5.43  | 4.10E-07 | 5.36E-06 | 6.00 |
| ILMN_1668592 | NA         | 0.26  | 6.69  | 5.43  | 4.11E-07 | 5.36E-06 | 6.00 |
| ILMN_1724946 | SPINT1     | -0.23 | 6.98  | -5.43 | 4.11E-07 | 5.36E-06 | 6.00 |
| ILMN_2151541 | DNAJC10    | 0.39  | 9.25  | 5.43  | 4.12E-07 | 5.37E-06 | 6.00 |
| ILMN_2333766 | PPIP5K1    | -0.26 | 7.80  | -5.43 | 4.12E-07 | 5.37E-06 | 6.00 |
| ILMN_1777794 | PRKCSH     | -0.21 | 8.21  | -5.43 | 4.13E-07 | 5.38E-06 | 6.00 |
| ILMN_1769634 | STRA13     | -0.27 | 9.41  | -5.43 | 4.15E-07 | 5.41E-06 | 5.99 |
| ILMN_2082585 | SNAI2      | 0.48  | 7.78  | 5.43  | 4.16E-07 | 5.42E-06 | 5.99 |
| ILMN_1664292 | ZNF415     | -0.22 | 7.02  | -5.43 | 4.18E-07 | 5.43E-06 | 5.98 |
| ILMN_1703572 | PCDH20     | -0.63 | 7.24  | -5.42 | 4.22E-07 | 5.49E-06 | 5.97 |
| ILMN_1755364 | RALA       | -0.23 | 10.16 | -5.42 | 4.31E-07 | 5.60E-06 | 5.95 |
| ILMN_2351466 | NTM        | 0.27  | 7.01  | 5.42  | 4.35E-07 | 5.65E-06 | 5.95 |
| ILMN_1811624 | THADA      | 0.17  | 7.22  | 5.41  | 4.39E-07 | 5.71E-06 | 5.94 |
| ILMN_1711617 | GMFG       | 0.56  | 8.30  | 5.41  | 4.40E-07 | 5.71E-06 | 5.94 |
| ILMN_1718303 | NECTIN2    | 0.31  | 7.72  | 5.41  | 4.40E-07 | 5.72E-06 | 5.93 |
| ILMN_1672908 | TWIST1     | 0.35  | 6.73  | 5.41  | 4.41E-07 | 5.73E-06 | 5.93 |
| ILMN_1656382 | NA         | -0.23 | 6.99  | -5.42 | 4.42E-07 | 5.73E-06 | 5.94 |
| ILMN_2058795 | CPQ        | 0.37  | 8.05  | 5.41  | 4.44E-07 | 5.76E-06 | 5.92 |
| ILMN_1674633 | UBE2H      | 0.21  | 6.63  | 5.41  | 4.45E-07 | 5.77E-06 | 5.92 |
| ILMN_2152178 | FAN1       | -0.23 | 7.54  | -5.41 | 4.48E-07 | 5.80E-06 | 5.92 |
| ILMN_1762606 | AQP11      | -0.37 | 7.32  | -5.41 | 4.49E-07 | 5.81E-06 | 5.92 |
| ILMN_1785202 | STAT4      | 0.44  | 7.47  | 5.41  | 4.51E-07 | 5.84E-06 | 5.91 |
| ILMN_1749368 | HIST1H3H   | -0.18 | 6.52  | -5.41 | 4.52E-07 | 5.85E-06 | 5.91 |
| ILMN_2121437 | NCL        | 0.27  | 10.36 | 5.41  | 4.55E-07 | 5.88E-06 | 5.90 |
| ILMN_1749180 | ESRP1      | -0.26 | 7.20  | -5.40 | 4.57E-07 | 5.91E-06 | 5.90 |
| ILMN_1800935 | ARV1       | -0.27 | 8.22  | -5.40 | 4.60E-07 | 5.95E-06 | 5.89 |
| ILMN_1774823 | RPL34      | 0.33  | 8.21  | 5.40  | 4.61E-07 | 5.96E-06 | 5.89 |
| ILMN_1705301 | TEAD4      | 0.26  | 6.79  | 5.40  | 4.64E-07 | 6.00E-06 | 5.88 |
| ILMN_1723480 | BST2       | 0.44  | 7.91  | 5.40  | 4.65E-07 | 6.01E-06 | 5.88 |
| ILMN_1692107 | KMT5B      | -0.17 | 6.65  | -5.40 | 4.74E-07 | 6.11E-06 | 5.86 |
| ILMN_1764309 | ADH1A      | -0.87 | 10.93 | -5.40 | 4.74E-07 | 6.12E-06 | 5.86 |
| ILMN_1753111 | NAMPT      | 0.64  | 7.44  | 5.39  | 4.79E-07 | 6.18E-06 | 5.85 |
| ILMN_1801606 | AMZ2       | 0.29  | 8.89  | 5.39  | 4.79E-07 | 6.18E-06 | 5.85 |
| ILMN_3241005 | MFS6L      | -0.26 | 7.10  | -5.39 | 4.85E-07 | 6.25E-06 | 5.84 |
| ILMN_1783681 | MRPL34     | -0.34 | 8.95  | -5.39 | 4.85E-07 | 6.25E-06 | 5.84 |
| ILMN_3247848 | SPACA6     | 0.17  | 6.90  | 5.39  | 4.87E-07 | 6.28E-06 | 5.84 |
| ILMN_2337974 | PKIA       | 0.28  | 6.96  | 5.39  | 4.89E-07 | 6.30E-06 | 5.83 |
| ILMN_1683658 | FKBP1A     | -0.30 | 9.93  | -5.39 | 4.90E-07 | 6.31E-06 | 5.83 |
| ILMN_3242586 | RHOU       | -0.68 | 9.68  | -5.39 | 4.92E-07 | 6.34E-06 | 5.83 |
| ILMN_1749868 | FAM171A1   | -0.31 | 9.57  | -5.39 | 4.94E-07 | 6.35E-06 | 5.82 |
| ILMN_1739946 | VKORC1     | 0.25  | 9.69  | 5.38  | 5.02E-07 | 6.46E-06 | 5.81 |
| ILMN_1763264 | MRPL2      | -0.28 | 7.77  | -5.38 | 5.02E-07 | 6.46E-06 | 5.81 |
| ILMN_1740319 | IFI27L2    | 0.31  | 7.45  | 5.38  | 5.05E-07 | 6.49E-06 | 5.80 |
| ILMN_1732066 | CKMT1A     | -0.53 | 9.90  | -5.38 | 5.07E-07 | 6.51E-06 | 5.80 |
| ILMN_2414014 | RBM10      | -0.26 | 10.36 | -5.38 | 5.08E-07 | 6.52E-06 | 5.80 |
| ILMN_1687857 | ST6GALNAC4 | 0.28  | 7.43  | 5.38  | 5.08E-07 | 6.52E-06 | 5.80 |



|              |          |       |       |       |          |          |      |
|--------------|----------|-------|-------|-------|----------|----------|------|
| ILMN_1714700 | TRIB2    | 0.33  | 7.17  | 5.38  | 5.14E-07 | 6.60E-06 | 5.78 |
| ILMN_1769751 | PIGG     | -0.22 | 7.34  | -5.38 | 5.14E-07 | 6.60E-06 | 5.78 |
| ILMN_1694776 | SCP2     | -0.26 | 7.07  | -5.38 | 5.16E-07 | 6.62E-06 | 5.78 |
| ILMN_1662932 | LCP1     | 0.86  | 9.88  | 5.38  | 5.19E-07 | 6.65E-06 | 5.78 |
| ILMN_1675130 | NFIC     | 0.26  | 8.11  | 5.37  | 5.19E-07 | 6.65E-06 | 5.78 |
| ILMN_1653496 | GLUL     | 0.19  | 6.64  | 5.37  | 5.20E-07 | 6.65E-06 | 5.77 |
| ILMN_1790518 | JADE3    | 0.20  | 7.80  | 5.37  | 5.20E-07 | 6.65E-06 | 5.77 |
| ILMN_2099783 | ATP6V1F  | 0.27  | 9.72  | 5.37  | 5.24E-07 | 6.70E-06 | 5.77 |
| ILMN_1789781 | PIM3     | 0.14  | 6.43  | 5.37  | 5.25E-07 | 6.71E-06 | 5.76 |
| ILMN_1696021 | KPNA6    | 0.18  | 8.96  | 5.37  | 5.26E-07 | 6.72E-06 | 5.76 |
| ILMN_1737252 | NRG1     | 0.22  | 6.52  | 5.37  | 5.28E-07 | 6.75E-06 | 5.76 |
| ILMN_3248948 | NA       | -0.26 | 7.03  | -5.37 | 5.30E-07 | 6.77E-06 | 5.76 |
| ILMN_1701195 | PLA2G7   | 0.68  | 7.75  | 5.37  | 5.31E-07 | 6.79E-06 | 5.76 |
| ILMN_3246388 | MED14    | -0.21 | 8.00  | -5.37 | 5.31E-07 | 6.79E-06 | 5.75 |
| ILMN_1716552 | ENAH     | 0.26  | 7.14  | 5.37  | 5.33E-07 | 6.80E-06 | 5.75 |
| ILMN_1805225 | LPCAT3   | -0.39 | 8.74  | -5.37 | 5.32E-07 | 6.80E-06 | 5.75 |
| ILMN_1825249 | NA       | -0.19 | 6.75  | -5.37 | 5.33E-07 | 6.80E-06 | 5.75 |
| ILMN_1707156 | LRRFIP2  | -0.50 | 8.72  | -5.37 | 5.35E-07 | 6.82E-06 | 5.75 |
| ILMN_1655720 | CNNM4    | -0.39 | 7.87  | -5.37 | 5.36E-07 | 6.84E-06 | 5.74 |
| ILMN_1658333 | ECM1     | 0.22  | 6.87  | 5.37  | 5.37E-07 | 6.85E-06 | 5.74 |
| ILMN_2184640 | NOLC1    | 0.24  | 7.01  | 5.37  | 5.39E-07 | 6.87E-06 | 5.74 |
| ILMN_1725193 | IGFBP2   | 0.53  | 7.39  | 5.36  | 5.43E-07 | 6.91E-06 | 5.73 |
| ILMN_1783593 | CCL13    | 0.89  | 7.66  | 5.36  | 5.43E-07 | 6.92E-06 | 5.73 |
| ILMN_2129388 | CCSER2   | 0.25  | 7.96  | 5.36  | 5.44E-07 | 6.93E-06 | 5.73 |
| ILMN_1702973 | EVA1A    | 0.21  | 6.56  | 5.37  | 5.46E-07 | 6.94E-06 | 5.73 |
| ILMN_1696702 | NEO1     | -0.29 | 9.64  | -5.36 | 5.48E-07 | 6.97E-06 | 5.72 |
| ILMN_2194106 | TSPAN12  | -0.23 | 6.96  | -5.36 | 5.51E-07 | 7.00E-06 | 5.72 |
| ILMN_1706571 | SLC35D2  | -0.36 | 8.12  | -5.36 | 5.51E-07 | 7.00E-06 | 5.72 |
| ILMN_1767934 | PCSK5    | 0.25  | 7.42  | 5.36  | 5.52E-07 | 7.00E-06 | 5.72 |
| ILMN_1672611 | CDH11    | 0.46  | 7.80  | 5.36  | 5.53E-07 | 7.01E-06 | 5.71 |
| ILMN_2085862 | SLC15A3  | 0.47  | 8.26  | 5.36  | 5.56E-07 | 7.05E-06 | 5.71 |
| ILMN_2218604 | KLHL41   | 0.15  | 6.52  | 5.36  | 5.56E-07 | 7.05E-06 | 5.71 |
| ILMN_1796407 | SS18L2   | 0.23  | 10.36 | 5.36  | 5.59E-07 | 7.09E-06 | 5.70 |
| ILMN_2311779 | TMUB2    | -0.26 | 8.33  | -5.36 | 5.63E-07 | 7.13E-06 | 5.70 |
| ILMN_2327795 | RERE     | -0.31 | 8.14  | -5.36 | 5.63E-07 | 7.14E-06 | 5.70 |
| ILMN_1739587 | UTY      | 0.37  | 6.88  | 5.36  | 5.64E-07 | 7.15E-06 | 5.70 |
| ILMN_3251506 | ZNF69    | -0.46 | 8.50  | -5.36 | 5.65E-07 | 7.15E-06 | 5.69 |
| ILMN_3205271 | HMGB1    | 0.34  | 9.74  | 5.35  | 5.71E-07 | 7.23E-06 | 5.68 |
| ILMN_2066060 | HLA-DRB6 | 1.12  | 8.93  | 5.35  | 5.73E-07 | 7.25E-06 | 5.68 |
| ILMN_1873278 | FAM155A  | 0.21  | 6.70  | 5.35  | 5.74E-07 | 7.26E-06 | 5.68 |
| ILMN_2098616 | ANXA2R   | 0.30  | 7.19  | 5.35  | 5.74E-07 | 7.26E-06 | 5.68 |
| ILMN_1763207 | BATF3    | 0.23  | 6.63  | 5.35  | 5.79E-07 | 7.32E-06 | 5.67 |
| ILMN_1673275 | TRAPPC2  | -0.26 | 8.65  | -5.35 | 5.80E-07 | 7.33E-06 | 5.67 |
| ILMN_1696048 | MEDAG    | 0.52  | 6.70  | 5.35  | 5.84E-07 | 7.37E-06 | 5.66 |
| ILMN_1771966 | BCCIP    | 0.27  | 8.88  | 5.35  | 5.85E-07 | 7.38E-06 | 5.66 |
| ILMN_2384591 | HN1      | -0.31 | 8.00  | -5.35 | 5.85E-07 | 7.38E-06 | 5.67 |
| ILMN_1699856 | RALGDS   | 0.50  | 9.42  | 5.35  | 5.86E-07 | 7.38E-06 | 5.66 |
| ILMN_1748476 | NOP58    | 0.25  | 9.45  | 5.35  | 5.86E-07 | 7.38E-06 | 5.66 |

|              |          |       |       |       |          |          |      |
|--------------|----------|-------|-------|-------|----------|----------|------|
| ILMN_1678816 | GREM2    | 0.53  | 7.22  | 5.35  | 5.91E-07 | 7.45E-06 | 5.66 |
| ILMN_1807925 | GNG2     | 0.29  | 7.12  | 5.34  | 5.91E-07 | 7.45E-06 | 5.65 |
| ILMN_1755582 | PCSK1N   | -0.24 | 6.66  | -5.34 | 5.93E-07 | 7.47E-06 | 5.65 |
| ILMN_1769705 | H3F3C    | 0.31  | 9.84  | 5.34  | 5.94E-07 | 7.48E-06 | 5.64 |
| ILMN_1752249 | PIEZO1   | 0.29  | 8.92  | 5.34  | 5.95E-07 | 7.49E-06 | 5.64 |
| ILMN_1679826 | CST7     | 0.25  | 6.85  | 5.34  | 5.96E-07 | 7.50E-06 | 5.64 |
| ILMN_1803194 | GALK1    | 0.31  | 8.46  | 5.34  | 5.99E-07 | 7.54E-06 | 5.64 |
| ILMN_1652677 | FAM89A   | 0.17  | 6.71  | 5.34  | 6.02E-07 | 7.56E-06 | 5.63 |
| ILMN_1726783 | RNASEH1  | 0.21  | 8.37  | 5.34  | 6.02E-07 | 7.56E-06 | 5.63 |
| ILMN_3307782 | FBXL18   | -0.24 | 7.83  | -5.34 | 6.02E-07 | 7.56E-06 | 5.63 |
| ILMN_1904628 | NA       | 0.38  | 7.17  | 5.34  | 6.03E-07 | 7.57E-06 | 5.64 |
| ILMN_3243744 | EAPP     | -0.41 | 8.43  | -5.34 | 6.03E-07 | 7.57E-06 | 5.64 |
| ILMN_1802456 | DCTD     | 0.26  | 8.60  | 5.34  | 6.04E-07 | 7.58E-06 | 5.63 |
| ILMN_1658498 | SLC44A3  | -0.40 | 8.52  | -5.34 | 6.06E-07 | 7.60E-06 | 5.63 |
| ILMN_1773079 | COL3A1   | 0.62  | 11.06 | 5.34  | 6.07E-07 | 7.62E-06 | 5.62 |
| ILMN_1776014 | NA       | 0.66  | 6.93  | 5.34  | 6.08E-07 | 7.62E-06 | 5.62 |
| ILMN_1760628 | RABL6    | -0.28 | 7.40  | -5.34 | 6.11E-07 | 7.66E-06 | 5.62 |
| ILMN_1782551 | E2F5     | 0.33  | 7.59  | 5.34  | 6.16E-07 | 7.72E-06 | 5.62 |
| ILMN_1801101 | ZBTB48   | -0.26 | 7.91  | -5.33 | 6.18E-07 | 7.73E-06 | 5.61 |
| ILMN_1711383 | STK4     | 0.42  | 9.83  | 5.33  | 6.21E-07 | 7.77E-06 | 5.60 |
| ILMN_1738347 | RNPEP    | -0.34 | 8.85  | -5.33 | 6.22E-07 | 7.79E-06 | 5.60 |
| ILMN_1674380 | TRPC1    | 0.21  | 6.81  | 5.33  | 6.25E-07 | 7.81E-06 | 5.60 |
| ILMN_1750088 | VRK2     | 0.19  | 6.94  | 5.33  | 6.25E-07 | 7.81E-06 | 5.60 |
| ILMN_3240308 | C3       | 0.31  | 6.82  | 5.33  | 6.25E-07 | 7.81E-06 | 5.60 |
| ILMN_1751161 | COL7A1   | 0.53  | 7.87  | 5.33  | 6.25E-07 | 7.82E-06 | 5.59 |
| ILMN_1701749 | UQCRFS1  | -0.32 | 11.43 | -5.33 | 6.26E-07 | 7.82E-06 | 5.59 |
| ILMN_1658709 | LAMB1    | 0.30  | 9.16  | 5.33  | 6.28E-07 | 7.84E-06 | 5.59 |
| ILMN_1764321 | ACOT4    | -0.25 | 7.10  | -5.33 | 6.28E-07 | 7.84E-06 | 5.59 |
| ILMN_2109197 | EPB41L3  | -0.38 | 8.67  | -5.33 | 6.31E-07 | 7.87E-06 | 5.59 |
| ILMN_2317580 | SHANK3   | 0.36  | 7.56  | 5.33  | 6.35E-07 | 7.92E-06 | 5.58 |
| ILMN_1784948 | SPOCD1   | 0.20  | 6.46  | 5.33  | 6.42E-07 | 8.00E-06 | 5.57 |
| ILMN_1776925 | PRSS22   | 0.22  | 6.57  | 5.32  | 6.43E-07 | 8.01E-06 | 5.57 |
| ILMN_1720865 | OSBPL7   | -0.43 | 9.03  | -5.32 | 6.47E-07 | 8.06E-06 | 5.56 |
| ILMN_1741391 | RALGAPA1 | -0.23 | 8.51  | -5.32 | 6.49E-07 | 8.08E-06 | 5.56 |
| ILMN_1750961 | TM6SF1   | 0.19  | 6.72  | 5.32  | 6.50E-07 | 8.10E-06 | 5.56 |
| ILMN_1660199 | ACAA2    | -0.48 | 9.62  | -5.32 | 6.51E-07 | 8.10E-06 | 5.56 |
| ILMN_1802082 | PRDM8    | 0.22  | 6.96  | 5.32  | 6.52E-07 | 8.12E-06 | 5.55 |
| ILMN_3243961 | ZNF252P  | -0.31 | 8.64  | -5.32 | 6.54E-07 | 8.14E-06 | 5.55 |
| ILMN_1679268 | PELI1    | 0.33  | 8.46  | 5.32  | 6.56E-07 | 8.15E-06 | 5.55 |
| ILMN_3241087 | INPP5J   | -0.19 | 6.66  | -5.32 | 6.56E-07 | 8.15E-06 | 5.55 |
| ILMN_1665831 | CLPTM1   | -0.23 | 8.64  | -5.32 | 6.57E-07 | 8.16E-06 | 5.55 |
| ILMN_1711988 | KCNK12   | 0.44  | 6.89  | 5.32  | 6.60E-07 | 8.20E-06 | 5.54 |
| ILMN_1741200 | RFX5     | 0.36  | 8.85  | 5.32  | 6.61E-07 | 8.21E-06 | 5.54 |
| ILMN_1677466 | DUSP6    | 0.20  | 6.81  | 5.32  | 6.62E-07 | 8.21E-06 | 5.54 |
| ILMN_1705302 | FCGRT    | -0.45 | 10.02 | -5.32 | 6.63E-07 | 8.23E-06 | 5.54 |
| ILMN_1801953 | IHH      | -0.24 | 6.97  | -5.32 | 6.64E-07 | 8.23E-06 | 5.54 |
| ILMN_1656807 | RPL27    | 0.18  | 12.32 | 5.32  | 6.68E-07 | 8.28E-06 | 5.53 |
| ILMN_1772486 | ELF2     | -0.16 | 6.79  | -5.32 | 6.69E-07 | 8.29E-06 | 5.53 |

|              |          |       |       |       |          |          |      |
|--------------|----------|-------|-------|-------|----------|----------|------|
| ILMN_1810977 | CDV3     | 0.37  | 9.43  | 5.31  | 6.70E-07 | 8.31E-06 | 5.53 |
| ILMN_1714383 | TPD52L1  | 0.33  | 7.20  | 5.31  | 6.71E-07 | 8.31E-06 | 5.53 |
| ILMN_1780700 | GUSBP2   | -0.18 | 6.79  | -5.31 | 6.75E-07 | 8.35E-06 | 5.52 |
| ILMN_1675117 | HSD17B11 | -0.46 | 8.23  | -5.31 | 6.78E-07 | 8.39E-06 | 5.52 |
| ILMN_1911503 | NA       | -0.26 | 7.60  | -5.31 | 6.79E-07 | 8.40E-06 | 5.52 |
| ILMN_1789233 | VPS37C   | -0.19 | 9.88  | -5.31 | 6.83E-07 | 8.44E-06 | 5.51 |
| ILMN_1796244 | CD2BP2   | 0.19  | 9.32  | 5.31  | 6.86E-07 | 8.48E-06 | 5.51 |
| ILMN_2412294 | GNB5     | 0.24  | 6.82  | 5.31  | 6.88E-07 | 8.51E-06 | 5.50 |
| ILMN_1693552 | CD300A   | 0.21  | 6.72  | 5.31  | 6.97E-07 | 8.61E-06 | 5.49 |
| ILMN_1688642 | LAMC3    | 0.39  | 7.12  | 5.31  | 6.98E-07 | 8.62E-06 | 5.49 |
| ILMN_1810441 | TRIM3    | -0.16 | 6.82  | -5.31 | 6.99E-07 | 8.63E-06 | 5.49 |
| ILMN_1751785 | DMRT2    | -0.34 | 6.83  | -5.30 | 7.01E-07 | 8.65E-06 | 5.49 |
| ILMN_2372136 | P4HTM    | -0.25 | 7.55  | -5.31 | 7.01E-07 | 8.65E-06 | 5.49 |
| ILMN_1682428 | HENMT1   | 0.38  | 8.44  | 5.30  | 7.02E-07 | 8.66E-06 | 5.48 |
| ILMN_1712400 | SERPINB6 | 0.40  | 11.03 | 5.30  | 7.06E-07 | 8.71E-06 | 5.48 |
| ILMN_1682661 | BMP3     | -0.23 | 6.60  | -5.30 | 7.09E-07 | 8.74E-06 | 5.47 |
| ILMN_2044027 | NCOR1P1  | -0.24 | 7.96  | -5.30 | 7.11E-07 | 8.76E-06 | 5.47 |
| ILMN_1663512 | COX5B    | -0.38 | 12.00 | -5.30 | 7.12E-07 | 8.77E-06 | 5.47 |
| ILMN_1717877 | IVNS1ABP | -0.35 | 9.52  | -5.30 | 7.12E-07 | 8.77E-06 | 5.47 |
| ILMN_1675937 | ANKRD9   | -0.22 | 6.82  | -5.30 | 7.17E-07 | 8.82E-06 | 5.46 |
| ILMN_1684663 | ZDHC13   | -0.22 | 7.82  | -5.30 | 7.17E-07 | 8.82E-06 | 5.46 |
| ILMN_1666503 | DENND2A  | -0.58 | 8.69  | -5.30 | 7.19E-07 | 8.84E-06 | 5.46 |
| ILMN_2083243 | MNAT1    | 0.18  | 6.83  | 5.30  | 7.20E-07 | 8.85E-06 | 5.46 |
| ILMN_2090105 | TAGLN2   | 0.33  | 9.98  | 5.30  | 7.25E-07 | 8.91E-06 | 5.45 |
| ILMN_1658660 | ACTC1    | 0.27  | 6.43  | 5.30  | 7.26E-07 | 8.92E-06 | 5.45 |
| ILMN_1761912 | MGAT1    | 0.25  | 8.81  | 5.29  | 7.33E-07 | 9.00E-06 | 5.44 |
| ILMN_2044085 | RQCD1    | 0.20  | 7.16  | 5.29  | 7.34E-07 | 9.01E-06 | 5.44 |
| ILMN_1710734 | GZMK     | 0.58  | 7.37  | 5.29  | 7.36E-07 | 9.03E-06 | 5.44 |
| ILMN_1838313 | LRRRC8B  | 0.24  | 8.46  | 5.29  | 7.37E-07 | 9.04E-06 | 5.44 |
| ILMN_1702407 | SPIN1    | -0.20 | 7.47  | -5.29 | 7.39E-07 | 9.07E-06 | 5.43 |
| ILMN_2222317 | DNAJB4   | 0.24  | 6.89  | 5.29  | 7.42E-07 | 9.10E-06 | 5.43 |
| ILMN_1768662 | UCK2     | -0.24 | 7.41  | -5.29 | 7.44E-07 | 9.11E-06 | 5.43 |
| ILMN_1727813 | MPC2     | -0.30 | 9.42  | -5.29 | 7.48E-07 | 9.16E-06 | 5.42 |
| ILMN_1779234 | CXCL6    | 0.45  | 6.77  | 5.29  | 7.48E-07 | 9.16E-06 | 5.42 |
| ILMN_1794038 | FAM49A   | 0.25  | 6.76  | 5.29  | 7.49E-07 | 9.17E-06 | 5.42 |
| ILMN_3235718 | GUSBP11  | -0.19 | 6.92  | -5.29 | 7.50E-07 | 9.17E-06 | 5.42 |
| ILMN_3241798 | SNORA41  | 0.20  | 6.92  | 5.29  | 7.53E-07 | 9.21E-06 | 5.42 |
| ILMN_1792076 | TRERF1   | 0.12  | 6.63  | 5.29  | 7.54E-07 | 9.22E-06 | 5.41 |
| ILMN_1665877 | RNF149   | 0.23  | 10.00 | 5.29  | 7.56E-07 | 9.24E-06 | 5.41 |
| ILMN_1677603 | C1S      | 0.24  | 6.83  | 5.29  | 7.58E-07 | 9.26E-06 | 5.41 |
| ILMN_1804461 | MYH14    | -0.34 | 7.46  | -5.29 | 7.61E-07 | 9.29E-06 | 5.41 |
| ILMN_3306950 | CDK10    | -0.25 | 7.02  | -5.28 | 7.69E-07 | 9.39E-06 | 5.40 |
| ILMN_1762899 | EGR1     | 0.99  | 9.58  | 5.28  | 7.74E-07 | 9.44E-06 | 5.39 |
| ILMN_1713934 | LITAF    | -0.29 | 11.25 | -5.28 | 7.77E-07 | 9.48E-06 | 5.39 |
| ILMN_1676822 | C2orf40  | 0.40  | 6.94  | 5.28  | 7.78E-07 | 9.48E-06 | 5.38 |
| ILMN_1796490 | GRINA    | 0.33  | 7.73  | 5.28  | 7.82E-07 | 9.53E-06 | 5.38 |
| ILMN_1687084 | EOGT     | 0.21  | 7.06  | 5.28  | 7.82E-07 | 9.54E-06 | 5.38 |
| ILMN_1672589 | SEMA4B   | 0.39  | 8.68  | 5.28  | 7.86E-07 | 9.57E-06 | 5.37 |

|              |          |       |       |       |          |          |      |
|--------------|----------|-------|-------|-------|----------|----------|------|
| ILMN_1815158 | GPS2     | -0.23 | 7.58  | -5.28 | 7.88E-07 | 9.59E-06 | 5.37 |
| ILMN_1669773 | ANGPTL1  | 0.20  | 6.56  | 5.28  | 7.89E-07 | 9.61E-06 | 5.37 |
| ILMN_1813766 | RCL1     | 0.18  | 6.84  | 5.28  | 7.91E-07 | 9.63E-06 | 5.37 |
| ILMN_1699160 | ITK      | 0.49  | 7.38  | 5.28  | 7.93E-07 | 9.64E-06 | 5.37 |
| ILMN_1739222 | ETV5     | 0.27  | 7.02  | 5.27  | 8.00E-07 | 9.72E-06 | 5.36 |
| ILMN_3256868 | RBMX     | 0.17  | 7.12  | 5.27  | 8.00E-07 | 9.72E-06 | 5.36 |
| ILMN_1792506 | PLA1A    | 0.19  | 6.68  | 5.28  | 8.04E-07 | 9.77E-06 | 5.36 |
| ILMN_1907834 | NA       | -0.37 | 8.11  | -5.27 | 8.04E-07 | 9.77E-06 | 5.35 |
| ILMN_2358457 | ATF4     | 0.22  | 7.67  | 5.27  | 8.04E-07 | 9.77E-06 | 5.35 |
| ILMN_1663113 | TTLL12   | -0.33 | 8.27  | -5.27 | 8.06E-07 | 9.78E-06 | 5.35 |
| ILMN_1776674 | SAC3D1   | -0.25 | 7.68  | -5.27 | 8.12E-07 | 9.86E-06 | 5.34 |
| ILMN_1729980 | RNF216   | 0.22  | 7.51  | 5.27  | 8.18E-07 | 9.92E-06 | 5.34 |
| ILMN_1688295 | ZNF219   | -0.25 | 7.42  | -5.27 | 8.23E-07 | 9.98E-06 | 5.33 |
| ILMN_1744949 | RHOBTB3  | 0.36  | 8.64  | 5.26  | 8.30E-07 | 1.01E-05 | 5.32 |
| ILMN_1665526 | TCEA2    | 0.17  | 6.87  | 5.26  | 8.35E-07 | 1.01E-05 | 5.32 |
| ILMN_1731073 | CAPN9    | -0.60 | 8.95  | -5.26 | 8.36E-07 | 1.01E-05 | 5.32 |
| ILMN_3287244 | KIAA2013 | -0.27 | 8.88  | -5.26 | 8.38E-07 | 1.02E-05 | 5.31 |
| ILMN_1667260 | MAPK3    | -0.39 | 9.97  | -5.27 | 8.39E-07 | 1.02E-05 | 5.32 |
| ILMN_2175465 | RSL24D1  | 0.21  | 10.07 | 5.26  | 8.48E-07 | 1.03E-05 | 5.31 |
| ILMN_1770653 | MAL2     | -0.45 | 10.08 | -5.26 | 8.51E-07 | 1.03E-05 | 5.30 |
| ILMN_1761981 | FAM96A   | -0.29 | 10.35 | -5.26 | 8.53E-07 | 1.03E-05 | 5.30 |
| ILMN_1673950 | NA       | -0.27 | 6.97  | -5.26 | 8.55E-07 | 1.03E-05 | 5.29 |
| ILMN_1691151 | CHKA     | -0.26 | 7.50  | -5.26 | 8.62E-07 | 1.04E-05 | 5.29 |
| ILMN_1802669 | PPP3CB   | 0.22  | 8.64  | 5.26  | 8.65E-07 | 1.04E-05 | 5.28 |
| ILMN_1696243 | STMND1   | -0.22 | 6.83  | -5.25 | 8.67E-07 | 1.05E-05 | 5.28 |
| ILMN_2318011 | PSMA3    | 0.32  | 8.21  | 5.25  | 8.67E-07 | 1.05E-05 | 5.28 |
| ILMN_1721758 | ID4      | 0.13  | 6.37  | 5.25  | 8.69E-07 | 1.05E-05 | 5.28 |
| ILMN_1765523 | TOLLIP   | -0.21 | 7.16  | -5.25 | 8.73E-07 | 1.05E-05 | 5.27 |
| ILMN_1715175 | MET      | 0.34  | 8.11  | 5.25  | 8.86E-07 | 1.07E-05 | 5.26 |
| ILMN_2380938 | SYT7     | -0.45 | 7.90  | -5.25 | 8.86E-07 | 1.07E-05 | 5.26 |
| ILMN_2405642 | DHDDS    | -0.32 | 8.13  | -5.25 | 8.86E-07 | 1.07E-05 | 5.26 |
| ILMN_1791144 | NA       | -0.23 | 7.06  | -5.25 | 8.91E-07 | 1.07E-05 | 5.25 |
| ILMN_1704084 | CMAHP    | -0.44 | 7.55  | -5.25 | 8.94E-07 | 1.08E-05 | 5.25 |
| ILMN_1725791 | HACD1    | 0.26  | 6.83  | 5.25  | 8.95E-07 | 1.08E-05 | 5.25 |
| ILMN_1777411 | ATP1A2   | 0.22  | 6.51  | 5.25  | 8.99E-07 | 1.08E-05 | 5.24 |
| ILMN_1722781 | EGR3     | 0.29  | 6.53  | 5.24  | 9.04E-07 | 1.09E-05 | 5.24 |
| ILMN_1685690 | KDM5D    | 0.73  | 7.37  | 5.24  | 9.05E-07 | 1.09E-05 | 5.24 |
| ILMN_1796669 | PSEN1    | -0.18 | 7.07  | -5.24 | 9.05E-07 | 1.09E-05 | 5.24 |
| ILMN_2287276 | FAM177A1 | -0.24 | 7.59  | -5.24 | 9.06E-07 | 1.09E-05 | 5.24 |
| ILMN_1653599 | ATP5D    | -0.35 | 10.34 | -5.24 | 9.06E-07 | 1.09E-05 | 5.24 |
| ILMN_1653709 | TIMM9    | 0.25  | 8.12  | 5.24  | 9.07E-07 | 1.09E-05 | 5.24 |
| ILMN_1709094 | LIFR     | 0.24  | 7.00  | 5.24  | 9.12E-07 | 1.09E-05 | 5.23 |
| ILMN_1692742 | DENND3   | 0.22  | 7.04  | 5.24  | 9.14E-07 | 1.10E-05 | 5.23 |
| ILMN_3239435 | HTT      | -0.17 | 6.91  | -5.24 | 9.17E-07 | 1.10E-05 | 5.23 |
| ILMN_1755383 | LRRC1    | -0.41 | 10.38 | -5.24 | 9.18E-07 | 1.10E-05 | 5.23 |
| ILMN_1742089 | NLN      | -0.21 | 6.91  | -5.24 | 9.19E-07 | 1.10E-05 | 5.22 |
| ILMN_2062620 | NMT2     | -0.20 | 6.79  | -5.24 | 9.19E-07 | 1.10E-05 | 5.22 |
| ILMN_1685678 | EEF1B2   | -0.30 | 8.21  | -5.24 | 9.20E-07 | 1.10E-05 | 5.22 |

|              |          |       |       |       |          |          |      |
|--------------|----------|-------|-------|-------|----------|----------|------|
| ILMN_1792551 | MROH7    | -0.27 | 6.88  | -5.24 | 9.22E-07 | 1.10E-05 | 5.22 |
| ILMN_3235964 | HSPA7    | 0.21  | 6.91  | 5.24  | 9.22E-07 | 1.10E-05 | 5.22 |
| ILMN_1671257 | DKC1     | 0.23  | 9.52  | 5.24  | 9.29E-07 | 1.11E-05 | 5.21 |
| ILMN_1781155 | LYN      | 0.53  | 9.18  | 5.24  | 9.31E-07 | 1.11E-05 | 5.21 |
| ILMN_1733861 | ARHGEF11 | -0.16 | 6.85  | -5.24 | 9.32E-07 | 1.11E-05 | 5.21 |
| ILMN_1672807 | CA5B     | 0.17  | 6.74  | 5.24  | 9.35E-07 | 1.12E-05 | 5.21 |
| ILMN_1680132 | CADM1    | 0.33  | 7.26  | 5.24  | 9.34E-07 | 1.12E-05 | 5.21 |
| ILMN_2181968 | CBL      | 0.26  | 7.55  | 5.24  | 9.35E-07 | 1.12E-05 | 5.21 |
| ILMN_1803197 | RAB3IP   | -0.25 | 8.80  | -5.23 | 9.47E-07 | 1.13E-05 | 5.20 |
| ILMN_2058468 | BACH2    | 0.31  | 6.63  | 5.23  | 9.48E-07 | 1.13E-05 | 5.19 |
| ILMN_2410986 | STAT3    | 0.31  | 8.09  | 5.24  | 9.52E-07 | 1.14E-05 | 5.20 |
| ILMN_1829555 | LCE6A    | -0.96 | 9.23  | -5.23 | 9.65E-07 | 1.15E-05 | 5.18 |
| ILMN_2388975 | CERK     | -0.28 | 8.72  | -5.23 | 9.70E-07 | 1.16E-05 | 5.17 |
| ILMN_2405470 | KLHDC9   | -0.19 | 6.74  | -5.23 | 9.77E-07 | 1.16E-05 | 5.17 |
| ILMN_1707804 | NA       | -0.37 | 8.09  | -5.23 | 9.86E-07 | 1.17E-05 | 5.16 |
| ILMN_1730433 | CD2AP    | -0.38 | 8.15  | -5.22 | 9.86E-07 | 1.17E-05 | 5.16 |
| ILMN_1722716 | SLC17A1  | -0.28 | 6.86  | -5.22 | 1.01E-06 | 1.20E-05 | 5.14 |
| ILMN_1726153 | NA       | 0.22  | 6.63  | 5.22  | 1.02E-06 | 1.21E-05 | 5.13 |
| ILMN_2202948 | BUB1     | 0.33  | 7.00  | 5.22  | 1.02E-06 | 1.21E-05 | 5.13 |
| ILMN_1654060 | MKNK2    | -0.25 | 7.45  | -5.22 | 1.02E-06 | 1.21E-05 | 5.13 |
| ILMN_1807448 | FAM8A1   | -0.26 | 7.77  | -5.22 | 1.02E-06 | 1.21E-05 | 5.13 |
| ILMN_3251132 | TMOD2    | 0.14  | 6.69  | 5.22  | 1.02E-06 | 1.21E-05 | 5.13 |
| ILMN_2065690 | GRAMD3   | -0.37 | 8.63  | -5.22 | 1.02E-06 | 1.21E-05 | 5.13 |
| ILMN_3238785 | SNHG9    | 0.29  | 8.05  | 5.22  | 1.02E-06 | 1.22E-05 | 5.12 |
| ILMN_1796409 | C1QB     | 0.98  | 9.51  | 5.21  | 1.04E-06 | 1.23E-05 | 5.11 |
| ILMN_1657857 | TMEM14C  | -0.26 | 9.99  | -5.21 | 1.05E-06 | 1.24E-05 | 5.10 |
| ILMN_1723165 | NA       | -0.18 | 6.76  | -5.21 | 1.05E-06 | 1.25E-05 | 5.10 |
| ILMN_1740923 | SLC52A3  | -0.28 | 7.17  | -5.21 | 1.05E-06 | 1.25E-05 | 5.10 |
| ILMN_1745623 | CRACR2B  | -0.50 | 8.79  | -5.21 | 1.06E-06 | 1.25E-05 | 5.09 |
| ILMN_1758067 | RGS4     | 0.19  | 6.64  | 5.21  | 1.06E-06 | 1.26E-05 | 5.09 |
| ILMN_1770850 | PNMA1    | 0.26  | 6.96  | 5.21  | 1.06E-06 | 1.26E-05 | 5.09 |
| ILMN_1691090 | MPV17    | 0.20  | 7.75  | 5.20  | 1.08E-06 | 1.28E-05 | 5.07 |
| ILMN_2388070 | TMEM44   | -0.31 | 7.53  | -5.21 | 1.08E-06 | 1.28E-05 | 5.07 |
| ILMN_1798454 | MAD2L1BP | -0.25 | 7.74  | -5.20 | 1.08E-06 | 1.28E-05 | 5.06 |
| ILMN_1702419 | SLC35D3  | 0.24  | 6.41  | 5.20  | 1.09E-06 | 1.29E-05 | 5.06 |
| ILMN_2365465 | XBP1     | 0.53  | 11.00 | 5.20  | 1.09E-06 | 1.29E-05 | 5.06 |
| ILMN_1728426 | INPPL1   | -0.25 | 8.17  | -5.20 | 1.10E-06 | 1.30E-05 | 5.05 |
| ILMN_1800447 | PHKB     | -0.22 | 8.74  | -5.20 | 1.11E-06 | 1.31E-05 | 5.04 |
| ILMN_1838655 | NA       | -0.15 | 6.69  | -5.20 | 1.11E-06 | 1.31E-05 | 5.04 |
| ILMN_3307887 | PRR14L   | -0.18 | 9.10  | -5.20 | 1.11E-06 | 1.32E-05 | 5.04 |
| ILMN_1802380 | RERE     | -0.36 | 9.05  | -5.19 | 1.12E-06 | 1.33E-05 | 5.03 |
| ILMN_1684554 | COL16A1  | 0.38  | 8.21  | 5.19  | 1.12E-06 | 1.33E-05 | 5.03 |
| ILMN_2301624 | MACF1    | 0.26  | 8.69  | 5.19  | 1.13E-06 | 1.33E-05 | 5.03 |
| ILMN_1672596 | BCAR1    | -0.21 | 7.07  | -5.19 | 1.13E-06 | 1.33E-05 | 5.02 |
| ILMN_3234920 | NA       | -0.19 | 6.97  | -5.20 | 1.13E-06 | 1.33E-05 | 5.03 |
| ILMN_2290118 | MEGF9    | 0.18  | 6.66  | 5.19  | 1.13E-06 | 1.34E-05 | 5.02 |
| ILMN_1673181 | SNORD100 | 0.16  | 6.76  | 5.19  | 1.14E-06 | 1.34E-05 | 5.02 |
| ILMN_2263718 | SPAG9    | 0.29  | 8.53  | 5.19  | 1.15E-06 | 1.35E-05 | 5.01 |

|              |          |       |       |       |          |          |      |
|--------------|----------|-------|-------|-------|----------|----------|------|
| ILMN_1758811 | IMPA1    | -0.38 | 8.79  | -5.19 | 1.15E-06 | 1.35E-05 | 5.01 |
| ILMN_1669523 | FOS      | 1.21  | 10.11 | 5.19  | 1.15E-06 | 1.36E-05 | 5.00 |
| ILMN_1801246 | IFITM1   | 0.51  | 9.29  | 5.19  | 1.15E-06 | 1.36E-05 | 5.00 |
| ILMN_2313672 | IL1RL1   | 0.48  | 6.51  | 5.19  | 1.15E-06 | 1.36E-05 | 5.00 |
| ILMN_3240900 | NA       | 0.21  | 6.53  | 5.19  | 1.15E-06 | 1.36E-05 | 5.00 |
| ILMN_2320513 | APBB3    | -0.26 | 7.67  | -5.19 | 1.16E-06 | 1.36E-05 | 5.00 |
| ILMN_1796339 | PLEKHA2  | 0.43  | 8.39  | 5.19  | 1.16E-06 | 1.36E-05 | 5.01 |
| ILMN_3239965 | IDO1     | 0.51  | 7.04  | 5.18  | 1.17E-06 | 1.38E-05 | 4.99 |
| ILMN_1771411 | ALG6     | -0.17 | 8.11  | -5.18 | 1.17E-06 | 1.38E-05 | 4.99 |
| ILMN_1678922 | HERC4    | 0.30  | 8.63  | 5.18  | 1.17E-06 | 1.38E-05 | 4.99 |
| ILMN_1761963 | ABHD18   | -0.19 | 7.29  | -5.18 | 1.18E-06 | 1.38E-05 | 4.99 |
| ILMN_2304495 | PPP1R1B  | -0.51 | 10.90 | -5.18 | 1.18E-06 | 1.39E-05 | 4.98 |
| ILMN_1759436 | NOSIP    | -0.27 | 9.43  | -5.18 | 1.19E-06 | 1.40E-05 | 4.98 |
| ILMN_1765310 | TCEAL2   | 0.33  | 6.77  | 5.18  | 1.19E-06 | 1.40E-05 | 4.97 |
| ILMN_1815346 | TMEM136  | 0.15  | 6.55  | 5.18  | 1.19E-06 | 1.40E-05 | 4.97 |
| ILMN_3259509 | C11orf86 | -0.26 | 6.77  | -5.18 | 1.19E-06 | 1.40E-05 | 4.97 |
| ILMN_3187362 | NA       | 0.21  | 6.59  | 5.18  | 1.19E-06 | 1.40E-05 | 4.97 |
| ILMN_1757210 | CALML4   | -0.41 | 10.47 | -5.18 | 1.19E-06 | 1.40E-05 | 4.97 |
| ILMN_1760143 | ADRM1    | 0.22  | 8.99  | 5.18  | 1.19E-06 | 1.40E-05 | 4.97 |
| ILMN_1705442 | CMTM3    | 0.37  | 7.99  | 5.18  | 1.19E-06 | 1.40E-05 | 4.97 |
| ILMN_1759772 | LRRCS5   | -0.18 | 6.86  | -5.18 | 1.20E-06 | 1.41E-05 | 4.96 |
| ILMN_2392043 | SPI1     | 0.33  | 7.01  | 5.17  | 1.21E-06 | 1.42E-05 | 4.95 |
| ILMN_1790562 | EYA3     | 0.18  | 6.51  | 5.17  | 1.22E-06 | 1.42E-05 | 4.95 |
| ILMN_1805606 | PLEKHG1  | 0.21  | 7.07  | 5.18  | 1.22E-06 | 1.42E-05 | 4.96 |
| ILMN_2408683 | PLPP3    | 0.33  | 7.52  | 5.17  | 1.22E-06 | 1.43E-05 | 4.95 |
| ILMN_1742269 | NA       | -0.21 | 7.06  | -5.17 | 1.22E-06 | 1.43E-05 | 4.95 |
| ILMN_1767662 | CERS6    | -0.48 | 10.18 | -5.17 | 1.23E-06 | 1.43E-05 | 4.94 |
| ILMN_1761445 | TPBGL    | -0.51 | 7.57  | -5.17 | 1.23E-06 | 1.44E-05 | 4.94 |
| ILMN_2355559 | PSAP     | 0.22  | 11.88 | 5.17  | 1.23E-06 | 1.44E-05 | 4.94 |
| ILMN_1777449 | IFT74    | -0.29 | 7.82  | -5.17 | 1.24E-06 | 1.44E-05 | 4.94 |
| ILMN_1751072 | SRPRB    | 0.25  | 8.78  | 5.17  | 1.24E-06 | 1.45E-05 | 4.93 |
| ILMN_1673880 | EFEMP1   | 0.30  | 6.77  | 5.17  | 1.24E-06 | 1.45E-05 | 4.93 |
| ILMN_1704985 | CYP27A1  | -0.46 | 8.44  | -5.17 | 1.25E-06 | 1.45E-05 | 4.93 |
| ILMN_3207933 | ABCE1    | 0.27  | 7.93  | 5.17  | 1.25E-06 | 1.45E-05 | 4.93 |
| ILMN_1806010 | CUL9     | -0.19 | 7.16  | -5.17 | 1.25E-06 | 1.45E-05 | 4.93 |
| ILMN_1742238 | SET      | 0.22  | 10.58 | 5.17  | 1.25E-06 | 1.46E-05 | 4.93 |
| ILMN_1670532 | GMCL1    | -0.24 | 7.78  | -5.17 | 1.25E-06 | 1.46E-05 | 4.93 |
| ILMN_2367070 | ACOT9    | 0.27  | 7.38  | 5.17  | 1.26E-06 | 1.46E-05 | 4.92 |
| ILMN_1738736 | SNX4     | -0.23 | 8.36  | -5.17 | 1.26E-06 | 1.47E-05 | 4.92 |
| ILMN_2188333 | CD69     | 0.67  | 7.49  | 5.16  | 1.27E-06 | 1.48E-05 | 4.91 |
| ILMN_1799725 | DOCK2    | 0.62  | 8.39  | 5.16  | 1.28E-06 | 1.49E-05 | 4.91 |
| ILMN_1743232 | MICALCL  | -0.36 | 7.64  | -5.16 | 1.28E-06 | 1.49E-05 | 4.90 |
| ILMN_1771870 | FAM98C   | -0.19 | 7.06  | -5.16 | 1.29E-06 | 1.50E-05 | 4.90 |
| ILMN_2222234 | PRDX4    | 0.39  | 9.63  | 5.16  | 1.29E-06 | 1.50E-05 | 4.90 |
| ILMN_1775822 | PDGFB    | 0.18  | 6.74  | 5.16  | 1.30E-06 | 1.51E-05 | 4.89 |
| ILMN_1692261 | EPHB1    | 0.18  | 6.45  | 5.16  | 1.30E-06 | 1.51E-05 | 4.89 |
| ILMN_2304186 | MITF     | 0.18  | 6.67  | 5.16  | 1.32E-06 | 1.53E-05 | 4.88 |
| ILMN_2148785 | GBP1     | 0.56  | 8.10  | 5.15  | 1.32E-06 | 1.53E-05 | 4.87 |

|              |             |       |       |       |          |          |      |
|--------------|-------------|-------|-------|-------|----------|----------|------|
| ILMN_1664922 | FLNB        | -0.36 | 10.86 | -5.15 | 1.32E-06 | 1.54E-05 | 4.87 |
| ILMN_1666372 | ATP5H       | -0.20 | 11.46 | -5.15 | 1.33E-06 | 1.54E-05 | 4.87 |
| ILMN_1713402 | FAM160A2    | -0.32 | 8.32  | -5.15 | 1.34E-06 | 1.55E-05 | 4.86 |
| ILMN_1715647 | VANGL2      | -0.35 | 7.42  | -5.15 | 1.34E-06 | 1.55E-05 | 4.86 |
| ILMN_1814701 | COL9A1      | -0.18 | 6.50  | -5.15 | 1.35E-06 | 1.57E-05 | 4.85 |
| ILMN_1762561 | PLA2G10     | -0.56 | 10.97 | -5.15 | 1.36E-06 | 1.57E-05 | 4.85 |
| ILMN_1815570 | HOXA6       | -0.19 | 6.85  | -5.15 | 1.36E-06 | 1.58E-05 | 4.84 |
| ILMN_1691119 | RNF122      | 0.25  | 6.89  | 5.15  | 1.37E-06 | 1.58E-05 | 4.84 |
| ILMN_3204734 | STAG3L5P-P' | -0.31 | 10.01 | -5.15 | 1.37E-06 | 1.59E-05 | 4.84 |
| ILMN_1754660 | ZCCHC24     | 0.29  | 7.52  | 5.14  | 1.38E-06 | 1.59E-05 | 4.83 |
| ILMN_1797342 | FNBP1       | 0.35  | 9.95  | 5.14  | 1.38E-06 | 1.60E-05 | 4.83 |
| ILMN_1715463 | SOSTDC1     | -0.45 | 7.37  | -5.14 | 1.39E-06 | 1.60E-05 | 4.83 |
| ILMN_1720181 | CLSTN1      | -0.21 | 6.85  | -5.14 | 1.39E-06 | 1.60E-05 | 4.83 |
| ILMN_2379130 | IRAK1       | 0.26  | 9.26  | 5.14  | 1.40E-06 | 1.61E-05 | 4.82 |
| ILMN_1661776 | CENPJ       | -0.23 | 7.34  | -5.14 | 1.40E-06 | 1.62E-05 | 4.82 |
| ILMN_1656184 | NA          | -0.23 | 7.17  | -5.14 | 1.41E-06 | 1.63E-05 | 4.81 |
| ILMN_1704873 | TCEB1       | 0.31  | 7.79  | 5.14  | 1.41E-06 | 1.63E-05 | 4.81 |
| ILMN_3305273 | PSAT1       | 0.19  | 6.55  | 5.14  | 1.41E-06 | 1.63E-05 | 4.81 |
| ILMN_1659936 | PPP1R15A    | 0.55  | 8.98  | 5.14  | 1.42E-06 | 1.63E-05 | 4.81 |
| ILMN_1811049 | POU2AF1     | 0.64  | 7.44  | 5.14  | 1.42E-06 | 1.64E-05 | 4.80 |
| ILMN_1788489 | HIST1H3F    | -0.18 | 6.73  | -5.14 | 1.42E-06 | 1.64E-05 | 4.80 |
| ILMN_2343563 | ANAPC11     | -0.18 | 7.41  | -5.14 | 1.43E-06 | 1.64E-05 | 4.80 |
| ILMN_1862217 | APH1B       | 0.24  | 7.26  | 5.14  | 1.43E-06 | 1.64E-05 | 4.80 |
| ILMN_2139035 | CASD1       | -0.30 | 7.36  | -5.14 | 1.43E-06 | 1.64E-05 | 4.80 |
| ILMN_1808299 | IQSEC1      | 0.21  | 7.27  | 5.14  | 1.43E-06 | 1.65E-05 | 4.80 |
| ILMN_1700628 | DDX24       | 0.22  | 8.77  | 5.13  | 1.44E-06 | 1.65E-05 | 4.79 |
| ILMN_1784256 | HDGFRP3     | 0.22  | 6.82  | 5.13  | 1.44E-06 | 1.66E-05 | 4.79 |
| ILMN_1765872 | SIPA1L3     | -0.17 | 6.90  | -5.13 | 1.45E-06 | 1.66E-05 | 4.79 |
| ILMN_1723412 | ASCL2       | -0.57 | 7.97  | -5.13 | 1.45E-06 | 1.66E-05 | 4.78 |
| ILMN_1768396 | AURKAIP1    | -0.23 | 10.35 | -5.13 | 1.45E-06 | 1.66E-05 | 4.78 |
| ILMN_1738217 | NA          | -0.18 | 6.98  | -5.13 | 1.45E-06 | 1.67E-05 | 4.78 |
| ILMN_1671374 | C19orf53    | 0.20  | 8.60  | 5.13  | 1.46E-06 | 1.67E-05 | 4.78 |
| ILMN_1699931 | HCST        | 0.59  | 8.73  | 5.13  | 1.46E-06 | 1.67E-05 | 4.78 |
| ILMN_2167416 | MR1         | 0.20  | 6.79  | 5.13  | 1.46E-06 | 1.67E-05 | 4.78 |
| ILMN_1804673 | SLC16A4     | 0.20  | 6.69  | 5.13  | 1.47E-06 | 1.68E-05 | 4.77 |
| ILMN_3192001 | NA          | 0.34  | 8.37  | 5.13  | 1.48E-06 | 1.70E-05 | 4.76 |
| ILMN_1746618 | PAQR7       | 0.18  | 6.71  | 5.13  | 1.49E-06 | 1.70E-05 | 4.76 |
| ILMN_1700549 | ERLIN2      | -0.21 | 8.01  | -5.12 | 1.50E-06 | 1.72E-05 | 4.75 |
| ILMN_1741491 | ZNHIT1      | -0.28 | 9.41  | -5.12 | 1.50E-06 | 1.72E-05 | 4.75 |
| ILMN_1741264 | MRPS33      | -0.27 | 9.36  | -5.13 | 1.51E-06 | 1.72E-05 | 4.75 |
| ILMN_1666206 | GSDMB       | -0.48 | 9.99  | -5.13 | 1.51E-06 | 1.73E-05 | 4.75 |
| ILMN_1657983 | TERF2IP     | 0.26  | 8.11  | 5.12  | 1.51E-06 | 1.73E-05 | 4.74 |
| ILMN_2143685 | CLDN7       | -0.59 | 11.03 | -5.12 | 1.51E-06 | 1.73E-05 | 4.74 |
| ILMN_1700384 | KIAA1522    | -0.40 | 8.50  | -5.12 | 1.52E-06 | 1.74E-05 | 4.74 |
| ILMN_1737462 | OXR1        | -0.23 | 8.95  | -5.12 | 1.53E-06 | 1.74E-05 | 4.74 |
| ILMN_1669940 | TMEM38B     | -0.28 | 7.49  | -5.12 | 1.55E-06 | 1.77E-05 | 4.72 |
| ILMN_1809951 | ZNF200      | 0.14  | 6.94  | 5.12  | 1.55E-06 | 1.77E-05 | 4.72 |
| ILMN_2410145 | NR4A1       | 0.18  | 6.37  | 5.12  | 1.55E-06 | 1.77E-05 | 4.72 |

|              |          |       |       |       |          |          |      |
|--------------|----------|-------|-------|-------|----------|----------|------|
| ILMN_1770719 | CLUH     | -0.28 | 7.73  | -5.12 | 1.55E-06 | 1.77E-05 | 4.72 |
| ILMN_2176502 | UNC5B    | -0.20 | 6.78  | -5.12 | 1.56E-06 | 1.77E-05 | 4.72 |
| ILMN_1775224 | NOS3     | 0.20  | 6.68  | 5.11  | 1.56E-06 | 1.78E-05 | 4.71 |
| ILMN_1655740 | SNAI2    | 0.26  | 7.14  | 5.11  | 1.56E-06 | 1.78E-05 | 4.71 |
| ILMN_1703132 | LYRM2    | -0.25 | 8.37  | -5.11 | 1.56E-06 | 1.78E-05 | 4.71 |
| ILMN_2181191 | TPI1     | -0.35 | 10.73 | -5.11 | 1.56E-06 | 1.78E-05 | 4.71 |
| ILMN_1653529 | TEX10    | 0.20  | 7.28  | 5.11  | 1.58E-06 | 1.79E-05 | 4.70 |
| ILMN_1719876 | KIAA1804 | -0.19 | 6.77  | -5.11 | 1.58E-06 | 1.79E-05 | 4.70 |
| ILMN_2187830 | CCNH     | 0.27  | 7.63  | 5.11  | 1.58E-06 | 1.79E-05 | 4.70 |
| ILMN_1743049 | PWP1     | 0.21  | 8.53  | 5.11  | 1.58E-06 | 1.80E-05 | 4.70 |
| ILMN_1683065 | COA5     | -0.25 | 8.50  | -5.11 | 1.60E-06 | 1.82E-05 | 4.69 |
| ILMN_1789186 | OBFC1    | 0.23  | 8.16  | 5.11  | 1.60E-06 | 1.82E-05 | 4.69 |
| ILMN_1807234 | ZNF700   | -0.22 | 7.41  | -5.11 | 1.60E-06 | 1.82E-05 | 4.69 |
| ILMN_2147105 | NA       | -0.52 | 9.47  | -5.11 | 1.60E-06 | 1.82E-05 | 4.69 |
| ILMN_3241524 | ZBTB22   | -0.18 | 8.00  | -5.11 | 1.61E-06 | 1.83E-05 | 4.68 |
| ILMN_3242603 | GTF2H2B  | -0.29 | 7.84  | -5.11 | 1.62E-06 | 1.84E-05 | 4.68 |
| ILMN_1753608 | TMEM131  | -0.24 | 10.71 | -5.11 | 1.62E-06 | 1.84E-05 | 4.68 |
| ILMN_3238707 | SNORA8   | 0.20  | 7.03  | 5.10  | 1.63E-06 | 1.85E-05 | 4.67 |
| ILMN_2203271 | FPR3     | 0.41  | 7.28  | 5.10  | 1.64E-06 | 1.85E-05 | 4.67 |
| ILMN_2274180 | MKKS     | -0.21 | 7.31  | -5.10 | 1.64E-06 | 1.86E-05 | 4.67 |
| ILMN_1675947 | MT3      | -0.21 | 6.54  | -5.10 | 1.66E-06 | 1.88E-05 | 4.66 |
| ILMN_1855278 | NA       | 0.37  | 8.45  | 5.10  | 1.66E-06 | 1.88E-05 | 4.65 |
| ILMN_1746948 | MYL5     | -0.35 | 7.47  | -5.10 | 1.67E-06 | 1.89E-05 | 4.65 |
| ILMN_1667748 | ANKRD33  | -0.26 | 8.00  | -5.10 | 1.67E-06 | 1.89E-05 | 4.65 |
| ILMN_1700024 | UST      | 0.21  | 6.80  | 5.10  | 1.67E-06 | 1.89E-05 | 4.65 |
| ILMN_1716583 | NME7     | 0.22  | 6.98  | 5.10  | 1.67E-06 | 1.89E-05 | 4.65 |
| ILMN_1757186 | GIMAP1   | 0.15  | 6.61  | 5.10  | 1.69E-06 | 1.91E-05 | 4.64 |
| ILMN_1679178 | ATP5D    | -0.21 | 7.20  | -5.09 | 1.70E-06 | 1.92E-05 | 4.63 |
| ILMN_1670439 | FYTTD1   | 0.28  | 7.96  | 5.09  | 1.71E-06 | 1.93E-05 | 4.63 |
| ILMN_1806434 | PAQR5    | -0.24 | 6.96  | -5.09 | 1.72E-06 | 1.94E-05 | 4.62 |
| ILMN_1779751 | C7orf55  | -0.24 | 7.29  | -5.09 | 1.72E-06 | 1.95E-05 | 4.62 |
| ILMN_1708348 | ADAM8    | 0.23  | 6.71  | 5.09  | 1.73E-06 | 1.95E-05 | 4.62 |
| ILMN_1733511 | GOLGA3   | -0.20 | 10.21 | -5.09 | 1.73E-06 | 1.95E-05 | 4.62 |
| ILMN_1715417 | SELP     | 0.14  | 6.41  | 5.09  | 1.74E-06 | 1.96E-05 | 4.61 |
| ILMN_1767142 | ZNF280D  | 0.22  | 7.22  | 5.09  | 1.74E-06 | 1.97E-05 | 4.61 |
| ILMN_1772132 | ATP5B    | -0.22 | 13.29 | -5.09 | 1.75E-06 | 1.97E-05 | 4.60 |
| ILMN_1692100 | ZNF35    | 0.19  | 7.05  | 5.09  | 1.76E-06 | 1.98E-05 | 4.60 |
| ILMN_1808783 | STRBP    | -0.19 | 8.02  | -5.09 | 1.76E-06 | 1.98E-05 | 4.60 |
| ILMN_1800750 | ZNF692   | -0.19 | 7.18  | -5.08 | 1.77E-06 | 1.99E-05 | 4.59 |
| ILMN_1778242 | CALM1    | -0.24 | 11.41 | -5.08 | 1.78E-06 | 2.01E-05 | 4.59 |
| ILMN_1723678 | PRPH     | 0.40  | 6.92  | 5.08  | 1.79E-06 | 2.01E-05 | 4.58 |
| ILMN_2242463 | CTSC     | 0.48  | 9.45  | 5.08  | 1.79E-06 | 2.01E-05 | 4.58 |
| ILMN_1662719 | GPBP1L1  | -0.23 | 7.90  | -5.08 | 1.79E-06 | 2.01E-05 | 4.58 |
| ILMN_1785660 | SRPRA    | 0.22  | 7.69  | 5.08  | 1.79E-06 | 2.01E-05 | 4.58 |
| ILMN_1678143 | ARHGDI3  | 0.63  | 10.90 | 5.08  | 1.79E-06 | 2.01E-05 | 4.58 |
| ILMN_2374449 | SPP1     | 0.38  | 6.79  | 5.08  | 1.79E-06 | 2.01E-05 | 4.58 |
| ILMN_1715476 | NA       | -0.52 | 10.23 | -5.08 | 1.79E-06 | 2.01E-05 | 4.58 |
| ILMN_3237779 | TMEM184C | -0.16 | 7.53  | -5.08 | 1.80E-06 | 2.02E-05 | 4.58 |



|              |           |       |       |       |          |          |      |
|--------------|-----------|-------|-------|-------|----------|----------|------|
| ILMN_1756784 | NCS1      | 0.28  | 6.93  | 5.08  | 1.81E-06 | 2.03E-05 | 4.57 |
| ILMN_1810922 | PCNT      | -0.20 | 8.31  | -5.08 | 1.82E-06 | 2.04E-05 | 4.57 |
| ILMN_3241046 | MYBL1     | 0.25  | 6.68  | 5.08  | 1.82E-06 | 2.04E-05 | 4.56 |
| ILMN_1785644 | AP5S1     | -0.17 | 7.12  | -5.08 | 1.83E-06 | 2.05E-05 | 4.56 |
| ILMN_1668924 | BEGAIN    | -0.19 | 6.60  | -5.08 | 1.84E-06 | 2.06E-05 | 4.56 |
| ILMN_1738272 | DHX36     | 0.24  | 7.75  | 5.07  | 1.86E-06 | 2.08E-05 | 4.55 |
| ILMN_1754842 | DLGAP4    | 0.20  | 7.41  | 5.07  | 1.86E-06 | 2.08E-05 | 4.55 |
| ILMN_1763011 | SUGCT     | -0.25 | 6.91  | -5.08 | 1.86E-06 | 2.08E-05 | 4.55 |
| ILMN_1739985 | TAGAP     | 0.22  | 6.52  | 5.07  | 1.87E-06 | 2.09E-05 | 4.54 |
| ILMN_1676663 | TNFRSF11B | 0.52  | 6.91  | 5.07  | 1.87E-06 | 2.10E-05 | 4.54 |
| ILMN_1713978 | SDF2      | -0.20 | 9.48  | -5.07 | 1.89E-06 | 2.12E-05 | 4.53 |
| ILMN_1711748 | PLTP      | 0.18  | 6.65  | 5.07  | 1.92E-06 | 2.14E-05 | 4.52 |
| ILMN_1721868 | KPNA2     | 0.30  | 7.31  | 5.07  | 1.92E-06 | 2.15E-05 | 4.52 |
| ILMN_1723505 | GPRIN2    | -0.18 | 6.59  | -5.06 | 1.93E-06 | 2.15E-05 | 4.51 |
| ILMN_1782938 | SLC16A10  | 0.39  | 6.96  | 5.06  | 1.93E-06 | 2.15E-05 | 4.51 |
| ILMN_1739594 | ACOT11    | -0.48 | 8.82  | -5.06 | 1.94E-06 | 2.17E-05 | 4.50 |
| ILMN_3245625 | RFX7      | 0.23  | 8.44  | 5.06  | 1.94E-06 | 2.17E-05 | 4.50 |
| ILMN_1668986 | PRELID2   | -0.16 | 6.53  | -5.06 | 1.95E-06 | 2.17E-05 | 4.51 |
| ILMN_1809522 | NACC2     | 0.16  | 6.64  | 5.06  | 1.95E-06 | 2.18E-05 | 4.50 |
| ILMN_1723042 | CLDN3     | -0.51 | 10.22 | -5.06 | 1.95E-06 | 2.18E-05 | 4.50 |
| ILMN_1800197 | MRPL36    | 0.25  | 9.34  | 5.06  | 1.95E-06 | 2.18E-05 | 4.50 |
| ILMN_2157510 | BLOC1S1   | -0.44 | 9.41  | -5.06 | 1.96E-06 | 2.18E-05 | 4.50 |
| ILMN_1680967 | SARNP     | 0.16  | 9.41  | 5.06  | 1.96E-06 | 2.18E-05 | 4.50 |
| ILMN_1665554 | BRF2      | -0.18 | 6.92  | -5.06 | 1.97E-06 | 2.19E-05 | 4.49 |
| ILMN_1792681 | CCDC86    | 0.27  | 7.28  | 5.06  | 1.97E-06 | 2.19E-05 | 4.50 |
| ILMN_1753249 | DDX10     | 0.23  | 7.70  | 5.06  | 1.98E-06 | 2.21E-05 | 4.48 |
| ILMN_1769201 | ELF3      | -0.56 | 9.90  | -5.06 | 1.99E-06 | 2.21E-05 | 4.48 |
| ILMN_2246188 | SLC45A2   | -0.18 | 6.46  | -5.06 | 1.99E-06 | 2.22E-05 | 4.48 |
| ILMN_1714148 | NAIF1     | -0.16 | 7.25  | -5.06 | 2.00E-06 | 2.22E-05 | 4.48 |
| ILMN_1783627 | CAST      | 0.19  | 6.88  | 5.06  | 2.00E-06 | 2.22E-05 | 4.48 |
| ILMN_1695946 | TRNP1     | 0.31  | 6.78  | 5.06  | 2.00E-06 | 2.22E-05 | 4.48 |
| ILMN_1843198 | AK4       | -0.56 | 8.49  | -5.05 | 2.00E-06 | 2.23E-05 | 4.47 |
| ILMN_2155228 | CRLF3     | 0.30  | 7.83  | 5.05  | 2.00E-06 | 2.23E-05 | 4.47 |
| ILMN_1785831 | ZDHC13    | -0.21 | 7.63  | -5.05 | 2.01E-06 | 2.23E-05 | 4.47 |
| ILMN_1758034 | ETFDH     | -0.33 | 8.67  | -5.05 | 2.01E-06 | 2.23E-05 | 4.47 |
| ILMN_1780057 | RENBP     | 0.23  | 7.13  | 5.05  | 2.01E-06 | 2.23E-05 | 4.47 |
| ILMN_3309448 | MIR1247   | -0.16 | 6.53  | -5.05 | 2.01E-06 | 2.23E-05 | 4.47 |
| ILMN_1666924 | PINK1     | -0.32 | 8.10  | -5.05 | 2.01E-06 | 2.23E-05 | 4.47 |
| ILMN_1749109 | PSAP      | 0.23  | 11.93 | 5.05  | 2.02E-06 | 2.24E-05 | 4.47 |
| ILMN_1674811 | OASL      | 0.34  | 7.12  | 5.06  | 2.02E-06 | 2.24E-05 | 4.47 |
| ILMN_1674250 | NCKAP1L   | 0.45  | 7.48  | 5.05  | 2.03E-06 | 2.25E-05 | 4.46 |
| ILMN_1779855 | HSD17B6   | 0.33  | 7.22  | 5.05  | 2.03E-06 | 2.25E-05 | 4.46 |
| ILMN_1679919 | ASCC2     | -0.21 | 9.46  | -5.05 | 2.03E-06 | 2.25E-05 | 4.46 |
| ILMN_1665428 | GSDMD     | -0.29 | 8.89  | -5.05 | 2.04E-06 | 2.25E-05 | 4.46 |
| ILMN_1807300 | PKD2      | 0.15  | 6.78  | 5.05  | 2.05E-06 | 2.27E-05 | 4.45 |
| ILMN_1714599 | CAMLG     | 0.21  | 10.21 | 5.05  | 2.05E-06 | 2.27E-05 | 4.45 |
| ILMN_2354269 | ZC2HC1C   | -0.17 | 6.84  | -5.05 | 2.05E-06 | 2.27E-05 | 4.45 |
| ILMN_1706015 | FAM43A    | 0.44  | 7.81  | 5.05  | 2.06E-06 | 2.28E-05 | 4.45 |

|              |          |       |       |       |          |          |      |
|--------------|----------|-------|-------|-------|----------|----------|------|
| ILMN_1798977 | ADGRG3   | 0.12  | 6.30  | 5.05  | 2.06E-06 | 2.28E-05 | 4.45 |
| ILMN_1778301 | C6orf132 | -0.22 | 7.00  | -5.05 | 2.08E-06 | 2.30E-05 | 4.44 |
| ILMN_1745991 | GNRH1    | -0.16 | 7.12  | -5.05 | 2.08E-06 | 2.30E-05 | 4.44 |
| ILMN_1813338 | LAG3     | 0.30  | 6.93  | 5.04  | 2.09E-06 | 2.31E-05 | 4.43 |
| ILMN_1691237 | CAP2     | 0.43  | 7.62  | 5.04  | 2.09E-06 | 2.31E-05 | 4.43 |
| ILMN_1748546 | 2-Sep    | 0.23  | 10.90 | 5.04  | 2.10E-06 | 2.31E-05 | 4.43 |
| ILMN_1782922 | PDE4B    | 0.31  | 6.78  | 5.04  | 2.10E-06 | 2.31E-05 | 4.43 |
| ILMN_1872404 | CCDC50   | 0.23  | 7.40  | 5.04  | 2.11E-06 | 2.33E-05 | 4.42 |
| ILMN_3240594 | RNU4ATAC | 0.30  | 6.85  | 5.04  | 2.12E-06 | 2.33E-05 | 4.42 |
| ILMN_3245659 | ERI1     | 0.25  | 7.70  | 5.04  | 2.12E-06 | 2.33E-05 | 4.42 |
| ILMN_3279935 | NA       | 0.19  | 6.87  | 5.04  | 2.12E-06 | 2.33E-05 | 4.42 |
| ILMN_2396287 | RFX2     | 0.19  | 6.48  | 5.04  | 2.12E-06 | 2.33E-05 | 4.42 |
| ILMN_3247462 | GLRX3    | 0.36  | 8.48  | 5.04  | 2.12E-06 | 2.34E-05 | 4.42 |
| ILMN_2130409 | PEX26    | -0.17 | 6.58  | -5.04 | 2.12E-06 | 2.34E-05 | 4.42 |
| ILMN_1787378 | ADD3     | -0.36 | 8.48  | -5.04 | 2.13E-06 | 2.34E-05 | 4.42 |
| ILMN_1751393 | ZNF684   | -0.15 | 7.09  | -5.04 | 2.13E-06 | 2.34E-05 | 4.41 |
| ILMN_1726169 | EDF1     | -0.26 | 11.20 | -5.04 | 2.14E-06 | 2.35E-05 | 4.42 |
| ILMN_1680223 | PNPLA8   | 0.28  | 7.59  | 5.04  | 2.15E-06 | 2.37E-05 | 4.40 |
| ILMN_2271149 | PGM5     | 0.49  | 7.40  | 5.04  | 2.16E-06 | 2.37E-05 | 4.40 |
| ILMN_1663032 | FNDC4    | 0.14  | 6.69  | 5.04  | 2.16E-06 | 2.37E-05 | 4.40 |
| ILMN_1684771 | PGRMC1   | -0.31 | 10.70 | -5.04 | 2.16E-06 | 2.37E-05 | 4.40 |
| ILMN_1727466 | KCNMB4   | 0.20  | 6.81  | 5.04  | 2.16E-06 | 2.38E-05 | 4.40 |
| ILMN_1738849 | SLC9A2   | -0.66 | 8.97  | -5.04 | 2.16E-06 | 2.38E-05 | 4.40 |
| ILMN_1774287 | CFB      | 0.67  | 8.90  | 5.04  | 2.16E-06 | 2.38E-05 | 4.40 |
| ILMN_2403247 | CMTM7    | 0.39  | 7.55  | 5.04  | 2.19E-06 | 2.40E-05 | 4.40 |
| ILMN_2376822 | NA       | -0.48 | 8.10  | -5.03 | 2.19E-06 | 2.41E-05 | 4.39 |
| ILMN_1788250 | LDOC1    | 0.16  | 6.64  | 5.03  | 2.20E-06 | 2.41E-05 | 4.38 |
| ILMN_1708672 | ACAT2    | -0.46 | 8.82  | -5.03 | 2.20E-06 | 2.41E-05 | 4.38 |
| ILMN_1705984 | HNMT     | -0.25 | 7.27  | -5.03 | 2.21E-06 | 2.42E-05 | 4.38 |
| ILMN_1771824 | DNAJC30  | -0.21 | 7.00  | -5.03 | 2.21E-06 | 2.42E-05 | 4.38 |
| ILMN_1712773 | SPAG1    | -0.22 | 6.96  | -5.03 | 2.22E-06 | 2.43E-05 | 4.38 |
| ILMN_1797310 | ATP6V1D  | -0.22 | 9.90  | -5.03 | 2.23E-06 | 2.44E-05 | 4.37 |
| ILMN_1743763 | TJAP1    | 0.26  | 8.52  | 5.03  | 2.23E-06 | 2.44E-05 | 4.37 |
| ILMN_1666384 | BZW1     | 0.36  | 9.54  | 5.03  | 2.24E-06 | 2.44E-05 | 4.37 |
| ILMN_2185884 | DHRS4    | -0.34 | 9.35  | -5.03 | 2.25E-06 | 2.46E-05 | 4.36 |
| ILMN_1699767 | PDE8A    | -0.20 | 7.03  | -5.03 | 2.25E-06 | 2.46E-05 | 4.36 |
| ILMN_2179778 | PHLDB2   | 0.30  | 6.82  | 5.03  | 2.26E-06 | 2.46E-05 | 4.36 |
| ILMN_1689111 | CXCL12   | 0.43  | 7.53  | 5.03  | 2.26E-06 | 2.47E-05 | 4.36 |
| ILMN_1739393 | SELE     | 0.42  | 6.72  | 5.02  | 2.28E-06 | 2.49E-05 | 4.35 |
| ILMN_2192072 | MMP7     | 0.93  | 7.02  | 5.02  | 2.28E-06 | 2.49E-05 | 4.35 |
| ILMN_1701111 | GPCPD1   | 0.25  | 7.44  | 5.02  | 2.29E-06 | 2.50E-05 | 4.35 |
| ILMN_1763941 | LRRC49   | 0.17  | 6.82  | 5.02  | 2.30E-06 | 2.51E-05 | 4.34 |
| ILMN_1807044 | UBAC1    | -0.29 | 9.39  | -5.02 | 2.31E-06 | 2.52E-05 | 4.34 |
| ILMN_1683883 | NA       | -0.48 | 8.56  | -5.02 | 2.32E-06 | 2.53E-05 | 4.34 |
| ILMN_1658504 | CHKA     | -0.33 | 8.73  | -5.02 | 2.33E-06 | 2.54E-05 | 4.34 |
| ILMN_1811957 | CAMSAP1  | 0.19  | 7.18  | 5.02  | 2.33E-06 | 2.54E-05 | 4.33 |
| ILMN_2120340 | RUVBL2   | -0.21 | 7.69  | -5.02 | 2.34E-06 | 2.54E-05 | 4.33 |
| ILMN_1789558 | ZC2HC1A  | 0.18  | 6.93  | 5.02  | 2.35E-06 | 2.56E-05 | 4.32 |

|              |            |       |       |       |          |          |      |
|--------------|------------|-------|-------|-------|----------|----------|------|
| ILMN_3310416 | SNORD114-5 | 0.15  | 6.56  | 5.02  | 2.35E-06 | 2.56E-05 | 4.32 |
| ILMN_1755937 | ANXA2      | 0.33  | 7.71  | 5.02  | 2.35E-06 | 2.56E-05 | 4.32 |
| ILMN_1774077 | GBP2       | 0.37  | 9.75  | 5.01  | 2.38E-06 | 2.59E-05 | 4.31 |
| ILMN_1673711 | HSP90AB1   | 0.26  | 9.87  | 5.01  | 2.38E-06 | 2.59E-05 | 4.31 |
| ILMN_1735955 | RPL23AP7   | 0.19  | 8.21  | 5.01  | 2.39E-06 | 2.59E-05 | 4.31 |
| ILMN_3238793 | C9orf129   | -0.14 | 6.62  | -5.01 | 2.39E-06 | 2.60E-05 | 4.30 |
| ILMN_1727078 | MIEN1      | -0.17 | 6.70  | -5.01 | 2.41E-06 | 2.61E-05 | 4.30 |
| ILMN_1744786 | SAGE1      | -0.39 | 7.25  | -5.01 | 2.41E-06 | 2.61E-05 | 4.30 |
| ILMN_1739001 | TACSTD2    | 0.91  | 7.29  | 5.01  | 2.41E-06 | 2.62E-05 | 4.30 |
| ILMN_1905548 | MBNL3      | -0.22 | 7.96  | -5.01 | 2.41E-06 | 2.62E-05 | 4.30 |
| ILMN_1815086 | NINJ1      | 0.36  | 8.39  | 5.01  | 2.43E-06 | 2.63E-05 | 4.29 |
| ILMN_1800573 | RPS21      | 0.23  | 8.85  | 5.01  | 2.43E-06 | 2.63E-05 | 4.29 |
| ILMN_3249351 | SNORA35    | -0.30 | 7.00  | -5.01 | 2.44E-06 | 2.64E-05 | 4.28 |
| ILMN_2378257 | SDF4       | -0.31 | 8.21  | -5.01 | 2.44E-06 | 2.64E-05 | 4.28 |
| ILMN_1783815 | COG7       | -0.17 | 7.06  | -5.01 | 2.44E-06 | 2.65E-05 | 4.28 |
| ILMN_1747078 | HYLS1      | -0.16 | 7.21  | -5.01 | 2.45E-06 | 2.66E-05 | 4.28 |
| ILMN_3307868 | CHI3L1     | 0.62  | 6.90  | 5.01  | 2.46E-06 | 2.66E-05 | 4.28 |
| ILMN_1661875 | ANK3       | -0.23 | 7.12  | -5.00 | 2.49E-06 | 2.70E-05 | 4.26 |
| ILMN_1750130 | GSPT1      | 0.21  | 10.35 | 5.00  | 2.50E-06 | 2.70E-05 | 4.26 |
| ILMN_3237936 | DHRS7C     | -0.18 | 6.62  | -5.00 | 2.50E-06 | 2.71E-05 | 4.26 |
| ILMN_1657145 | MEOX1      | 0.21  | 6.72  | 5.00  | 2.53E-06 | 2.74E-05 | 4.25 |
| ILMN_1738992 | MNDA       | 0.26  | 6.71  | 5.00  | 2.54E-06 | 2.75E-05 | 4.25 |
| ILMN_1782110 | ZBTB21     | 0.24  | 7.38  | 5.00  | 2.55E-06 | 2.75E-05 | 4.24 |
| ILMN_1806432 | NT5C       | -0.24 | 9.43  | -5.00 | 2.54E-06 | 2.75E-05 | 4.24 |
| ILMN_1685699 | PRSS3      | -0.48 | 9.40  | -5.00 | 2.55E-06 | 2.76E-05 | 4.24 |
| ILMN_1685403 | MMP7       | 0.82  | 7.01  | 5.00  | 2.55E-06 | 2.76E-05 | 4.24 |
| ILMN_1667609 | SNORD35A   | 0.15  | 6.59  | 5.00  | 2.55E-06 | 2.76E-05 | 4.25 |
| ILMN_2283196 | ZSWIM3     | -0.17 | 6.92  | -5.00 | 2.56E-06 | 2.76E-05 | 4.24 |
| ILMN_1655913 | NUCB2      | 0.32  | 8.27  | 4.99  | 2.58E-06 | 2.79E-05 | 4.23 |
| ILMN_1706664 | RIMKLA     | -0.24 | 6.83  | -4.99 | 2.59E-06 | 2.80E-05 | 4.23 |
| ILMN_2198878 | INPP4B     | 0.18  | 6.90  | 4.99  | 2.60E-06 | 2.80E-05 | 4.22 |
| ILMN_1700604 | RBM14      | -0.25 | 9.16  | -4.99 | 2.61E-06 | 2.81E-05 | 4.22 |
| ILMN_1794914 | UBTD1      | 0.18  | 6.67  | 4.99  | 2.62E-06 | 2.82E-05 | 4.22 |
| ILMN_1728132 | LDHB       | 0.38  | 9.14  | 4.99  | 2.63E-06 | 2.84E-05 | 4.21 |
| ILMN_1761101 | CCDC112    | -0.23 | 7.33  | -4.99 | 2.64E-06 | 2.84E-05 | 4.21 |
| ILMN_1711899 | ANXA2      | 0.52  | 9.31  | 4.99  | 2.64E-06 | 2.84E-05 | 4.21 |
| ILMN_1792256 | TBX2       | 0.29  | 7.41  | 4.99  | 2.65E-06 | 2.85E-05 | 4.20 |
| ILMN_3295874 | NA         | -0.24 | 7.14  | -4.99 | 2.66E-06 | 2.86E-05 | 4.20 |
| ILMN_1738796 | PITPNC1    | 0.16  | 6.66  | 4.99  | 2.66E-06 | 2.86E-05 | 4.20 |
| ILMN_1705241 | TDRD7      | -0.26 | 8.19  | -4.99 | 2.67E-06 | 2.87E-05 | 4.20 |
| ILMN_1708098 | LIX1L      | 0.18  | 6.76  | 4.99  | 2.67E-06 | 2.87E-05 | 4.20 |
| ILMN_1769451 | ILVBL      | -0.31 | 8.82  | -4.98 | 2.68E-06 | 2.88E-05 | 4.19 |
| ILMN_1732271 | BTBD9      | -0.12 | 6.52  | -4.99 | 2.69E-06 | 2.89E-05 | 4.20 |
| ILMN_1663379 | FBXL15     | -0.18 | 7.31  | -4.98 | 2.70E-06 | 2.90E-05 | 4.19 |
| ILMN_2222992 | ETF1       | 0.30  | 10.03 | 4.98  | 2.73E-06 | 2.93E-05 | 4.18 |
| ILMN_1678961 | FRMD4A     | 0.20  | 7.14  | 4.98  | 2.75E-06 | 2.95E-05 | 4.17 |
| ILMN_1862521 | DENND1B    | -0.23 | 7.74  | -4.98 | 2.75E-06 | 2.96E-05 | 4.17 |
| ILMN_2218780 | PDP1       | 0.19  | 6.94  | 4.98  | 2.77E-06 | 2.97E-05 | 4.17 |

|              |         |       |       |       |          |          |      |
|--------------|---------|-------|-------|-------|----------|----------|------|
| ILMN_2243553 | ZNF275  | 0.31  | 8.18  | 4.98  | 2.78E-06 | 2.98E-05 | 4.16 |
| ILMN_1690241 | BATF2   | -0.21 | 6.86  | -4.98 | 2.79E-06 | 2.99E-05 | 4.16 |
| ILMN_1707051 | NFATC1  | 0.28  | 6.73  | 4.97  | 2.83E-06 | 3.04E-05 | 4.14 |
| ILMN_1758474 | PRKRA   | 0.20  | 8.58  | 4.97  | 2.85E-06 | 3.06E-05 | 4.13 |
| ILMN_1801118 | SNRNP25 | -0.30 | 8.39  | -4.97 | 2.86E-06 | 3.06E-05 | 4.13 |
| ILMN_2376455 | CSF2RA  | 0.26  | 6.75  | 4.97  | 2.87E-06 | 3.07E-05 | 4.13 |
| ILMN_1771689 | EXD2    | -0.20 | 8.06  | -4.97 | 2.87E-06 | 3.08E-05 | 4.13 |
| ILMN_3237270 | 3-Mar   | -0.24 | 7.55  | -4.97 | 2.88E-06 | 3.08E-05 | 4.13 |
| ILMN_1739967 | TBK1    | 0.22  | 8.54  | 4.97  | 2.89E-06 | 3.09E-05 | 4.12 |
| ILMN_1752728 | FUCA1   | -0.45 | 10.77 | -4.97 | 2.89E-06 | 3.09E-05 | 4.12 |
| ILMN_1673639 | ABI3BP  | 0.52  | 8.63  | 4.97  | 2.90E-06 | 3.10E-05 | 4.12 |
| ILMN_1686116 | THBS1   | 0.86  | 9.55  | 4.97  | 2.90E-06 | 3.10E-05 | 4.12 |
| ILMN_1755537 | EIF1AY  | 1.16  | 8.10  | 4.97  | 2.90E-06 | 3.10E-05 | 4.12 |
| ILMN_1776000 | EID3    | 0.15  | 6.58  | 4.96  | 2.90E-06 | 3.10E-05 | 4.12 |
| ILMN_2246894 | EDF1    | -0.23 | 9.69  | -4.96 | 2.91E-06 | 3.11E-05 | 4.11 |
| ILMN_1696347 | CTSC    | 0.50  | 9.48  | 4.96  | 2.91E-06 | 3.11E-05 | 4.11 |
| ILMN_2287157 | NA      | -0.28 | 7.16  | -4.96 | 2.93E-06 | 3.13E-05 | 4.11 |
| ILMN_1778890 | LRR1    | -0.22 | 7.38  | -4.96 | 2.95E-06 | 3.15E-05 | 4.10 |
| ILMN_3306173 | MED7    | -0.15 | 7.46  | -4.96 | 2.96E-06 | 3.16E-05 | 4.10 |
| ILMN_2070896 | BMPR2   | 0.28  | 8.50  | 4.96  | 2.96E-06 | 3.16E-05 | 4.10 |
| ILMN_1711894 | MYB     | -0.48 | 9.95  | -4.96 | 2.97E-06 | 3.17E-05 | 4.10 |
| ILMN_1781884 | KRT12   | -0.28 | 6.80  | -4.96 | 2.99E-06 | 3.19E-05 | 4.09 |
| ILMN_1760574 | RAI2    | 0.22  | 6.80  | 4.96  | 3.01E-06 | 3.20E-05 | 4.09 |
| ILMN_2401701 | PCGF6   | 0.15  | 6.73  | 4.96  | 3.01E-06 | 3.21E-05 | 4.08 |
| ILMN_1752285 | RPL4    | 0.27  | 11.03 | 4.96  | 3.02E-06 | 3.21E-05 | 4.08 |
| ILMN_2382679 | REG3A   | 1.54  | 7.72  | 4.95  | 3.03E-06 | 3.22E-05 | 4.08 |
| ILMN_1788108 | NA      | 0.68  | 10.67 | 4.95  | 3.04E-06 | 3.23E-05 | 4.07 |
| ILMN_1719290 | NA      | -0.20 | 7.73  | -4.96 | 3.05E-06 | 3.25E-05 | 4.07 |
| ILMN_1805910 | MIER3   | -0.23 | 6.77  | -4.95 | 3.06E-06 | 3.25E-05 | 4.07 |
| ILMN_3234456 | TSTD1   | -0.21 | 7.06  | -4.95 | 3.07E-06 | 3.26E-05 | 4.06 |
| ILMN_1680624 | CREG1   | 0.33  | 8.96  | 4.95  | 3.08E-06 | 3.27E-05 | 4.06 |
| ILMN_1814247 | TCFL5   | 0.20  | 7.17  | 4.95  | 3.08E-06 | 3.27E-05 | 4.06 |
| ILMN_1651262 | HNRNPAB | -0.22 | 11.51 | -4.95 | 3.08E-06 | 3.27E-05 | 4.06 |
| ILMN_1657862 | AHCY    | 0.27  | 9.51  | 4.95  | 3.09E-06 | 3.28E-05 | 4.06 |
| ILMN_1680673 | NT5DC1  | -0.21 | 8.27  | -4.95 | 3.09E-06 | 3.28E-05 | 4.06 |
| ILMN_1765001 | NAT6    | 0.14  | 6.60  | 4.95  | 3.09E-06 | 3.28E-05 | 4.06 |
| ILMN_1795836 | YBEY    | -0.21 | 7.74  | -4.95 | 3.09E-06 | 3.28E-05 | 4.06 |
| ILMN_1656368 | ALDH4A1 | 0.16  | 6.58  | 4.95  | 3.09E-06 | 3.28E-05 | 4.06 |
| ILMN_1770030 | C7orf43 | -0.25 | 7.59  | -4.95 | 3.10E-06 | 3.28E-05 | 4.06 |
| ILMN_2298988 | ENTPD8  | -0.17 | 6.66  | -4.95 | 3.10E-06 | 3.28E-05 | 4.06 |
| ILMN_2413508 | ADGRE5  | 0.22  | 7.27  | 4.95  | 3.10E-06 | 3.28E-05 | 4.06 |
| ILMN_1777881 | TSPAN17 | -0.23 | 8.94  | -4.95 | 3.10E-06 | 3.28E-05 | 4.05 |
| ILMN_3238274 | BTBD2   | -0.28 | 9.51  | -4.95 | 3.10E-06 | 3.29E-05 | 4.05 |
| ILMN_1755173 | PLEKHA4 | 0.28  | 7.08  | 4.95  | 3.11E-06 | 3.29E-05 | 4.05 |
| ILMN_1810147 | ZNF524  | -0.21 | 7.47  | -4.95 | 3.11E-06 | 3.29E-05 | 4.05 |
| ILMN_1747771 | MAEA    | -0.21 | 10.13 | -4.95 | 3.11E-06 | 3.29E-05 | 4.05 |
| ILMN_1814589 | KIF22   | -0.20 | 7.07  | -4.95 | 3.11E-06 | 3.29E-05 | 4.05 |
| ILMN_1721901 | CTNNA1  | 0.30  | 7.73  | 4.95  | 3.11E-06 | 3.29E-05 | 4.05 |

|              |            |       |       |       |          |          |      |
|--------------|------------|-------|-------|-------|----------|----------|------|
| ILMN_1778308 | COL4A4     | 0.14  | 6.45  | 4.95  | 3.11E-06 | 3.29E-05 | 4.05 |
| ILMN_1903914 | NA         | 0.42  | 8.41  | 4.95  | 3.13E-06 | 3.30E-05 | 4.05 |
| ILMN_1784630 | KBTBD11    | -0.37 | 9.66  | -4.95 | 3.13E-06 | 3.31E-05 | 4.04 |
| ILMN_1712530 | AKAP1      | -0.27 | 7.51  | -4.95 | 3.14E-06 | 3.31E-05 | 4.04 |
| ILMN_1756360 | RPL35A     | 0.26  | 12.44 | 4.95  | 3.14E-06 | 3.32E-05 | 4.04 |
| ILMN_1694539 | MAP3K6     | 0.30  | 8.15  | 4.95  | 3.15E-06 | 3.32E-05 | 4.04 |
| ILMN_2052790 | NONO       | 0.18  | 10.79 | 4.94  | 3.16E-06 | 3.33E-05 | 4.04 |
| ILMN_2149566 | VPS25      | -0.18 | 7.59  | -4.94 | 3.16E-06 | 3.33E-05 | 4.04 |
| ILMN_1762275 | NA         | 0.15  | 6.93  | 4.94  | 3.17E-06 | 3.34E-05 | 4.03 |
| ILMN_1655710 | RPS25      | 0.48  | 8.91  | 4.94  | 3.18E-06 | 3.35E-05 | 4.03 |
| ILMN_1691249 | FBLIM1     | -0.20 | 7.00  | -4.94 | 3.19E-06 | 3.35E-05 | 4.03 |
| ILMN_1745068 | NA         | -0.23 | 6.91  | -4.94 | 3.19E-06 | 3.36E-05 | 4.03 |
| ILMN_1741597 | NUPR2      | -0.14 | 6.56  | -4.94 | 3.20E-06 | 3.36E-05 | 4.02 |
| ILMN_1764323 | METTL23    | 0.20  | 8.74  | 4.94  | 3.23E-06 | 3.40E-05 | 4.01 |
| ILMN_1729225 | SORCS2     | 0.16  | 6.49  | 4.94  | 3.23E-06 | 3.40E-05 | 4.02 |
| ILMN_1763433 | TRIM9      | 0.31  | 6.97  | 4.94  | 3.24E-06 | 3.40E-05 | 4.01 |
| ILMN_1675979 | RBMS3      | 0.16  | 6.57  | 4.94  | 3.24E-06 | 3.41E-05 | 4.01 |
| ILMN_1682774 | TEX30      | 0.19  | 7.11  | 4.94  | 3.24E-06 | 3.41E-05 | 4.01 |
| ILMN_2329927 | ABCG1      | -0.27 | 7.47  | -4.94 | 3.27E-06 | 3.43E-05 | 4.00 |
| ILMN_1767360 | IL10RB     | -0.36 | 8.37  | -4.94 | 3.28E-06 | 3.44E-05 | 4.01 |
| ILMN_1750079 | PURB       | 0.19  | 9.40  | 4.94  | 3.28E-06 | 3.45E-05 | 4.00 |
| ILMN_1652082 | ELF4       | -0.24 | 8.44  | -4.94 | 3.29E-06 | 3.45E-05 | 4.00 |
| ILMN_2206645 | ECD        | 0.17  | 7.19  | 4.93  | 3.29E-06 | 3.45E-05 | 4.00 |
| ILMN_1758816 | UGT8       | -0.22 | 7.67  | -4.93 | 3.30E-06 | 3.46E-05 | 3.99 |
| ILMN_1664030 | RAB1B      | -0.14 | 7.02  | -4.93 | 3.30E-06 | 3.46E-05 | 3.99 |
| ILMN_1676099 | SPON2      | 0.17  | 6.47  | 4.93  | 3.31E-06 | 3.47E-05 | 3.99 |
| ILMN_1769883 | IDE        | 0.20  | 7.20  | 4.93  | 3.31E-06 | 3.47E-05 | 3.99 |
| ILMN_2413064 | ST6GALNAC4 | 0.22  | 7.54  | 4.93  | 3.31E-06 | 3.47E-05 | 3.99 |
| ILMN_1656057 | PLAU       | 0.58  | 7.92  | 4.93  | 3.32E-06 | 3.48E-05 | 3.99 |
| ILMN_1673215 | PCBP1      | 0.20  | 11.31 | 4.93  | 3.34E-06 | 3.50E-05 | 3.98 |
| ILMN_2375003 | MAP4K4     | 0.18  | 7.12  | 4.93  | 3.35E-06 | 3.51E-05 | 3.98 |
| ILMN_2183856 | TSPAN6     | -0.31 | 7.38  | -4.93 | 3.35E-06 | 3.51E-05 | 3.98 |
| ILMN_1688071 | NAT1       | -0.28 | 7.51  | -4.93 | 3.36E-06 | 3.52E-05 | 3.98 |
| ILMN_1653856 | UBASH3B    | 0.25  | 7.09  | 4.93  | 3.37E-06 | 3.53E-05 | 3.97 |
| ILMN_1730731 | ERLIN1     | -0.17 | 7.17  | -4.93 | 3.39E-06 | 3.54E-05 | 3.97 |
| ILMN_2300970 | ETFB       | -0.31 | 9.38  | -4.93 | 3.41E-06 | 3.56E-05 | 3.96 |
| ILMN_1740609 | NA         | 0.27  | 7.91  | 4.93  | 3.41E-06 | 3.56E-05 | 3.96 |
| ILMN_1653205 | C8orf59    | 0.23  | 9.77  | 4.93  | 3.42E-06 | 3.57E-05 | 3.96 |
| ILMN_1740604 | RAB11FIP5  | 0.22  | 7.53  | 4.92  | 3.46E-06 | 3.61E-05 | 3.95 |
| ILMN_1811238 | ALPK2      | 0.42  | 6.80  | 4.93  | 3.46E-06 | 3.61E-05 | 3.95 |
| ILMN_1728639 | FCGR3B     | 0.27  | 6.66  | 4.92  | 3.48E-06 | 3.63E-05 | 3.94 |
| ILMN_2347298 | TSPYL2     | 0.27  | 7.02  | 4.92  | 3.48E-06 | 3.63E-05 | 3.94 |
| ILMN_3256004 | SNRPG      | 0.23  | 10.76 | 4.92  | 3.48E-06 | 3.63E-05 | 3.94 |
| ILMN_1758825 | ABLIM2     | -0.28 | 7.14  | -4.92 | 3.50E-06 | 3.65E-05 | 3.94 |
| ILMN_2208413 | ARHGAP15   | 0.47  | 8.39  | 4.92  | 3.50E-06 | 3.65E-05 | 3.94 |
| ILMN_1657515 | RPS6KA5    | -0.27 | 8.10  | -4.92 | 3.53E-06 | 3.68E-05 | 3.93 |
| ILMN_1783889 | PRKAA1     | -0.21 | 8.16  | -4.92 | 3.53E-06 | 3.68E-05 | 3.93 |
| ILMN_1730416 | CYCS       | -0.39 | 8.06  | -4.92 | 3.55E-06 | 3.70E-05 | 3.93 |

|              |          |       |       |       |          |          |      |
|--------------|----------|-------|-------|-------|----------|----------|------|
| ILMN_1760280 | NXT1     | 0.31  | 8.36  | 4.91  | 3.57E-06 | 3.71E-05 | 3.92 |
| ILMN_1752213 | TMEM60   | -0.24 | 8.78  | -4.91 | 3.59E-06 | 3.74E-05 | 3.91 |
| ILMN_2327090 | MAEA     | -0.28 | 7.78  | -4.91 | 3.61E-06 | 3.75E-05 | 3.91 |
| ILMN_2341793 | CCT7     | 0.22  | 10.26 | 4.91  | 3.62E-06 | 3.76E-05 | 3.91 |
| ILMN_3236428 | TMEM170B | 0.21  | 6.89  | 4.91  | 3.62E-06 | 3.76E-05 | 3.91 |
| ILMN_1813568 | TRPV1    | -0.17 | 6.66  | -4.91 | 3.63E-06 | 3.77E-05 | 3.90 |
| ILMN_1690621 | ADGRV1   | -0.16 | 6.47  | -4.91 | 3.63E-06 | 3.77E-05 | 3.90 |
| ILMN_1801205 | GPNMB    | 0.87  | 8.83  | 4.91  | 3.63E-06 | 3.78E-05 | 3.90 |
| ILMN_2082762 | SNORD68  | 0.24  | 6.99  | 4.91  | 3.63E-06 | 3.78E-05 | 3.90 |
| ILMN_2336803 | RPGR     | 0.14  | 6.67  | 4.91  | 3.64E-06 | 3.78E-05 | 3.90 |
| ILMN_1701114 | GBP1     | 0.41  | 7.64  | 4.91  | 3.64E-06 | 3.78E-05 | 3.90 |
| ILMN_1736548 | PHACTR4  | -0.24 | 9.51  | -4.91 | 3.65E-06 | 3.79E-05 | 3.90 |
| ILMN_1749878 | FAM124B  | 0.16  | 6.46  | 4.91  | 3.66E-06 | 3.79E-05 | 3.90 |
| ILMN_2326262 | SORBS1   | 0.29  | 7.04  | 4.91  | 3.67E-06 | 3.81E-05 | 3.89 |
| ILMN_2365711 | 2-Sep    | 0.19  | 11.30 | 4.91  | 3.69E-06 | 3.82E-05 | 3.89 |
| ILMN_2056479 | GLRX3    | 0.33  | 8.47  | 4.91  | 3.69E-06 | 3.83E-05 | 3.89 |
| ILMN_2235283 | MAPK1    | 0.24  | 7.67  | 4.91  | 3.70E-06 | 3.83E-05 | 3.88 |
| ILMN_1663618 | STAT3    | 0.31  | 8.36  | 4.90  | 3.75E-06 | 3.89E-05 | 3.87 |
| ILMN_1653200 | SLC22A17 | 0.20  | 7.26  | 4.90  | 3.76E-06 | 3.89E-05 | 3.87 |
| ILMN_1732967 | PPP1R18  | 0.55  | 8.15  | 4.90  | 3.77E-06 | 3.90E-05 | 3.87 |
| ILMN_1799105 | COL17A1  | -0.42 | 7.73  | -4.90 | 3.77E-06 | 3.90E-05 | 3.87 |
| ILMN_2076463 | SLC15A4  | 0.22  | 8.16  | 4.90  | 3.78E-06 | 3.92E-05 | 3.86 |
| ILMN_1774708 | ORMDL2   | -0.17 | 7.04  | -4.90 | 3.80E-06 | 3.93E-05 | 3.86 |
| ILMN_1783598 | CAB39L   | 0.18  | 6.86  | 4.90  | 3.82E-06 | 3.95E-05 | 3.85 |
| ILMN_2356031 | RNF121   | -0.18 | 8.02  | -4.90 | 3.84E-06 | 3.97E-05 | 3.85 |
| ILMN_1751607 | FOSB     | 1.31  | 8.03  | 4.90  | 3.85E-06 | 3.98E-05 | 3.85 |
| ILMN_1683859 | SLC7A1   | 0.30  | 8.65  | 4.90  | 3.85E-06 | 3.98E-05 | 3.85 |
| ILMN_1668960 | MID1IP1  | 0.24  | 7.46  | 4.90  | 3.87E-06 | 3.99E-05 | 3.84 |
| ILMN_1810037 | RUSC2    | 0.15  | 6.59  | 4.89  | 3.87E-06 | 4.00E-05 | 3.84 |
| ILMN_1674640 | CXCR6    | 0.19  | 6.59  | 4.89  | 3.88E-06 | 4.01E-05 | 3.84 |
| ILMN_1808374 | SNTB2    | 0.23  | 8.97  | 4.89  | 3.89E-06 | 4.02E-05 | 3.83 |
| ILMN_2400613 | SNX7     | -0.32 | 8.17  | -4.89 | 3.90E-06 | 4.02E-05 | 3.83 |
| ILMN_1665945 | ACBD3    | 0.22  | 9.36  | 4.90  | 3.91E-06 | 4.03E-05 | 3.84 |
| ILMN_1687335 | FLNA     | 0.36  | 7.03  | 4.89  | 3.91E-06 | 4.03E-05 | 3.83 |
| ILMN_2380698 | DSTN     | 0.27  | 10.36 | 4.89  | 3.93E-06 | 4.05E-05 | 3.83 |
| ILMN_1656979 | ABO      | -0.14 | 6.41  | -4.89 | 3.96E-06 | 4.08E-05 | 3.82 |
| ILMN_1809478 | SSBP1    | 0.19  | 9.43  | 4.89  | 3.97E-06 | 4.09E-05 | 3.82 |
| ILMN_2278653 | ZNF493   | -0.24 | 7.81  | -4.89 | 3.97E-06 | 4.09E-05 | 3.82 |
| ILMN_2125017 | TIGIT    | 0.20  | 6.63  | 4.89  | 3.99E-06 | 4.10E-05 | 3.81 |
| ILMN_2307656 | AGTRAP   | 0.16  | 6.60  | 4.89  | 4.01E-06 | 4.12E-05 | 3.81 |
| ILMN_1711786 | NFE2     | 0.19  | 6.44  | 4.89  | 4.03E-06 | 4.14E-05 | 3.80 |
| ILMN_1723846 | METTL21B | 0.19  | 8.01  | 4.89  | 4.03E-06 | 4.14E-05 | 3.80 |
| ILMN_1769135 | DPP7     | 0.21  | 7.14  | 4.88  | 4.08E-06 | 4.19E-05 | 3.79 |
| ILMN_1669409 | VSIG4    | 0.24  | 6.85  | 4.88  | 4.09E-06 | 4.21E-05 | 3.79 |
| ILMN_1658883 | ARAF     | -0.19 | 8.59  | -4.88 | 4.11E-06 | 4.22E-05 | 3.78 |
| ILMN_2139125 | LRFN5    | 0.17  | 6.63  | 4.88  | 4.11E-06 | 4.22E-05 | 3.78 |
| ILMN_1652128 | LMBRD1   | -0.24 | 10.30 | -4.88 | 4.12E-06 | 4.23E-05 | 3.78 |
| ILMN_1736752 | COMTD1   | -0.31 | 7.88  | -4.88 | 4.14E-06 | 4.25E-05 | 3.78 |

|              |          |       |       |       |          |          |      |
|--------------|----------|-------|-------|-------|----------|----------|------|
| ILMN_1765459 | S100A13  | 0.26  | 8.28  | 4.88  | 4.15E-06 | 4.26E-05 | 3.77 |
| ILMN_1707534 | NKRF     | 0.17  | 7.32  | 4.88  | 4.15E-06 | 4.26E-05 | 3.77 |
| ILMN_1791164 | TMEM231  | -0.17 | 6.68  | -4.88 | 4.17E-06 | 4.28E-05 | 3.77 |
| ILMN_1795944 | PRR13    | -0.24 | 7.18  | -4.88 | 4.18E-06 | 4.28E-05 | 3.77 |
| ILMN_1788099 | LSM4     | -0.32 | 8.94  | -4.88 | 4.18E-06 | 4.29E-05 | 3.77 |
| ILMN_1806123 | MRPL23   | -0.29 | 8.93  | -4.88 | 4.19E-06 | 4.30E-05 | 3.76 |
| ILMN_1801124 | MSANTD4  | 0.20  | 7.41  | 4.87  | 4.21E-06 | 4.31E-05 | 3.76 |
| ILMN_2386179 | ZMYND8   | -0.21 | 7.70  | -4.87 | 4.21E-06 | 4.31E-05 | 3.76 |
| ILMN_1689257 | MAEA     | -0.16 | 6.86  | -4.87 | 4.22E-06 | 4.32E-05 | 3.76 |
| ILMN_1710207 | SLF2     | -0.25 | 8.14  | -4.87 | 4.22E-06 | 4.32E-05 | 3.76 |
| ILMN_1670870 | ALCAM    | 0.24  | 8.21  | 4.87  | 4.24E-06 | 4.34E-05 | 3.75 |
| ILMN_2077858 | SIRT7    | -0.22 | 7.09  | -4.87 | 4.25E-06 | 4.35E-05 | 3.75 |
| ILMN_1774547 | MPRIP    | 0.24  | 8.59  | 4.87  | 4.26E-06 | 4.35E-05 | 3.75 |
| ILMN_1689097 | NAA20    | 0.15  | 10.39 | 4.87  | 4.29E-06 | 4.38E-05 | 3.74 |
| ILMN_1746148 | NRROS    | 0.18  | 6.75  | 4.87  | 4.29E-06 | 4.38E-05 | 3.74 |
| ILMN_1805344 | DDX5     | 0.24  | 11.61 | 4.87  | 4.30E-06 | 4.39E-05 | 3.75 |
| ILMN_3249142 | ZG16     | -1.07 | 11.90 | -4.87 | 4.30E-06 | 4.39E-05 | 3.74 |
| ILMN_2408450 | UBA5     | 0.21  | 7.83  | 4.87  | 4.31E-06 | 4.40E-05 | 3.74 |
| ILMN_1661799 | HIGD1A   | -0.37 | 11.07 | -4.87 | 4.34E-06 | 4.43E-05 | 3.73 |
| ILMN_3200322 | NA       | 0.19  | 7.71  | 4.87  | 4.34E-06 | 4.43E-05 | 3.73 |
| ILMN_3251423 | CHDH     | -0.40 | 7.94  | -4.87 | 4.36E-06 | 4.45E-05 | 3.73 |
| ILMN_1679476 | GART     | 0.24  | 8.83  | 4.87  | 4.37E-06 | 4.46E-05 | 3.72 |
| ILMN_3247139 | C17orf96 | 0.18  | 6.67  | 4.86  | 4.38E-06 | 4.47E-05 | 3.72 |
| ILMN_1732799 | CD34     | 0.32  | 7.43  | 4.86  | 4.41E-06 | 4.49E-05 | 3.72 |
| ILMN_1818617 | NA       | -0.28 | 7.67  | -4.86 | 4.45E-06 | 4.53E-05 | 3.71 |
| ILMN_1693635 | TSPYL2   | 0.16  | 6.70  | 4.86  | 4.48E-06 | 4.56E-05 | 3.70 |
| ILMN_1696284 | CLDN18   | 0.63  | 6.75  | 4.86  | 4.48E-06 | 4.56E-05 | 3.70 |
| ILMN_1801348 | GOT2     | -0.26 | 9.80  | -4.86 | 4.49E-06 | 4.57E-05 | 3.70 |
| ILMN_3241149 | TMEM236  | -0.23 | 6.61  | -4.86 | 4.52E-06 | 4.60E-05 | 3.69 |
| ILMN_1651850 | RPS16    | 0.17  | 13.28 | 4.86  | 4.52E-06 | 4.60E-05 | 3.69 |
| ILMN_2228845 | CCL28    | -0.26 | 6.86  | -4.86 | 4.54E-06 | 4.62E-05 | 3.69 |
| ILMN_1697864 | CXorf38  | 0.17  | 7.20  | 4.85  | 4.57E-06 | 4.64E-05 | 3.68 |
| ILMN_3250273 | TMOD2    | 0.20  | 6.88  | 4.85  | 4.57E-06 | 4.64E-05 | 3.68 |
| ILMN_1772369 | PDHA1    | -0.30 | 9.50  | -4.86 | 4.59E-06 | 4.67E-05 | 3.68 |
| ILMN_2130838 | UTP11    | 0.23  | 7.95  | 4.85  | 4.65E-06 | 4.72E-05 | 3.67 |
| ILMN_3307791 | FAM69A   | 0.21  | 8.13  | 4.85  | 4.66E-06 | 4.74E-05 | 3.66 |
| ILMN_1806692 | HEXB     | 0.17  | 11.20 | 4.85  | 4.67E-06 | 4.74E-05 | 3.66 |
| ILMN_1758963 | NADK     | -0.22 | 7.58  | -4.85 | 4.69E-06 | 4.76E-05 | 3.66 |
| ILMN_3234831 | NA       | 0.18  | 12.49 | 4.85  | 4.71E-06 | 4.78E-05 | 3.65 |
| ILMN_1685574 | TSC22D2  | 0.31  | 8.00  | 4.84  | 4.77E-06 | 4.84E-05 | 3.64 |
| ILMN_1728380 | PHOSPHO2 | -0.25 | 7.22  | -4.84 | 4.82E-06 | 4.89E-05 | 3.63 |
| ILMN_1671742 | UPF3A    | -0.23 | 7.94  | -4.84 | 4.82E-06 | 4.89E-05 | 3.63 |
| ILMN_2119692 | CSAD     | -0.22 | 7.88  | -4.84 | 4.84E-06 | 4.91E-05 | 3.63 |
| ILMN_1736567 | CD74     | 0.76  | 11.58 | 4.84  | 4.86E-06 | 4.93E-05 | 3.62 |
| ILMN_2186369 | NCOR1    | -0.20 | 7.70  | -4.84 | 4.87E-06 | 4.94E-05 | 3.62 |
| ILMN_1736481 | SECISBP2 | -0.14 | 8.36  | -4.84 | 4.88E-06 | 4.94E-05 | 3.62 |
| ILMN_1752793 | SAP18    | -0.22 | 7.71  | -4.84 | 4.88E-06 | 4.94E-05 | 3.62 |
| ILMN_2087941 | ENTPD3   | 0.23  | 7.38  | 4.84  | 4.89E-06 | 4.94E-05 | 3.62 |

|              |          |       |       |       |          |          |      |
|--------------|----------|-------|-------|-------|----------|----------|------|
| ILMN_2326712 | BACE2    | 0.46  | 8.27  | 4.84  | 4.92E-06 | 4.98E-05 | 3.61 |
| ILMN_1794659 | FUT2     | -0.48 | 8.23  | -4.84 | 4.92E-06 | 4.98E-05 | 3.61 |
| ILMN_1770290 | CNN2     | 0.35  | 8.39  | 4.84  | 4.93E-06 | 4.98E-05 | 3.61 |
| ILMN_1708164 | EIF3A    | 0.21  | 9.39  | 4.84  | 4.93E-06 | 4.99E-05 | 3.61 |
| ILMN_3238972 | SNORD123 | -0.17 | 6.74  | -4.83 | 4.94E-06 | 5.00E-05 | 3.61 |
| ILMN_1738656 | GLOD4    | -0.23 | 9.19  | -4.83 | 4.99E-06 | 5.04E-05 | 3.60 |
| ILMN_1766245 | SUPT4H1  | -0.16 | 7.75  | -4.83 | 4.99E-06 | 5.04E-05 | 3.60 |
| ILMN_1799028 | TSPAN5   | 0.16  | 6.86  | 4.83  | 5.00E-06 | 5.05E-05 | 3.59 |
| ILMN_1670901 | COX10    | -0.21 | 8.58  | -4.83 | 5.03E-06 | 5.08E-05 | 3.59 |
| ILMN_1736704 | DIXDC1   | 0.19  | 6.77  | 4.83  | 5.04E-06 | 5.08E-05 | 3.59 |
| ILMN_1665357 | EPS15    | 0.15  | 7.63  | 4.83  | 5.05E-06 | 5.09E-05 | 3.59 |
| ILMN_1804332 | GPR137   | -0.24 | 8.71  | -4.83 | 5.05E-06 | 5.09E-05 | 3.59 |
| ILMN_2121774 | ZG16     | -1.06 | 12.01 | -4.83 | 5.05E-06 | 5.09E-05 | 3.59 |
| ILMN_1701655 | SLC8B1   | -0.24 | 8.78  | -4.83 | 5.10E-06 | 5.14E-05 | 3.58 |
| ILMN_1739532 | DPRXP4   | -0.17 | 6.68  | -4.83 | 5.10E-06 | 5.14E-05 | 3.58 |
| ILMN_2384807 | LRRCC1   | -0.28 | 8.29  | -4.83 | 5.13E-06 | 5.17E-05 | 3.57 |
| ILMN_1663090 | SON      | 0.20  | 7.65  | 4.83  | 5.13E-06 | 5.17E-05 | 3.57 |
| ILMN_1727574 | ZNF827   | -0.23 | 7.83  | -4.83 | 5.13E-06 | 5.17E-05 | 3.57 |
| ILMN_1808713 | HSD17B2  | -0.73 | 9.84  | -4.82 | 5.15E-06 | 5.19E-05 | 3.57 |
| ILMN_1694213 | PLEKHO1  | 0.32  | 7.73  | 4.82  | 5.16E-06 | 5.19E-05 | 3.56 |
| ILMN_1745415 | BBX      | 0.25  | 8.67  | 4.82  | 5.16E-06 | 5.19E-05 | 3.56 |
| ILMN_1772124 | ATRN     | -0.19 | 7.37  | -4.82 | 5.19E-06 | 5.22E-05 | 3.56 |
| ILMN_2375484 | CPEB2    | -0.20 | 7.65  | -4.82 | 5.19E-06 | 5.22E-05 | 3.56 |
| ILMN_3229552 | MED7     | -0.15 | 7.44  | -4.82 | 5.21E-06 | 5.23E-05 | 3.56 |
| ILMN_1657810 | PPM1M    | 0.27  | 7.44  | 4.82  | 5.24E-06 | 5.27E-05 | 3.55 |
| ILMN_2348975 | NASP     | -0.18 | 7.47  | -4.82 | 5.25E-06 | 5.27E-05 | 3.55 |
| ILMN_1672191 | ATP5F1   | -0.30 | 9.15  | -4.82 | 5.26E-06 | 5.28E-05 | 3.55 |
| ILMN_1716983 | LILRA2   | 0.15  | 6.41  | 4.82  | 5.29E-06 | 5.31E-05 | 3.54 |
| ILMN_1810235 | ATP6V1E2 | 0.14  | 6.66  | 4.82  | 5.29E-06 | 5.31E-05 | 3.54 |
| ILMN_2059535 | PPM1F    | 0.22  | 8.17  | 4.82  | 5.29E-06 | 5.31E-05 | 3.54 |
| ILMN_2175131 | TMEM14C  | -0.18 | 10.78 | -4.82 | 5.31E-06 | 5.33E-05 | 3.54 |
| ILMN_3250049 | NA       | -0.24 | 7.48  | -4.82 | 5.34E-06 | 5.35E-05 | 3.53 |
| ILMN_1800638 | CELF2    | 0.16  | 6.73  | 4.82  | 5.34E-06 | 5.35E-05 | 3.53 |
| ILMN_1860638 | ST3GAL1  | 0.23  | 6.84  | 4.82  | 5.34E-06 | 5.36E-05 | 3.53 |
| ILMN_1677919 | GMPR2    | -0.18 | 8.42  | -4.82 | 5.36E-06 | 5.37E-05 | 3.53 |
| ILMN_1758146 | SIRPA    | 0.40  | 8.96  | 4.81  | 5.36E-06 | 5.37E-05 | 3.53 |
| ILMN_1679800 | BRIX1    | 0.28  | 8.75  | 4.81  | 5.37E-06 | 5.37E-05 | 3.53 |
| ILMN_2122374 | FAM49B   | 0.24  | 7.17  | 4.81  | 5.37E-06 | 5.37E-05 | 3.53 |
| ILMN_1676067 | SEMA3G   | 0.12  | 6.46  | 4.81  | 5.38E-06 | 5.39E-05 | 3.52 |
| ILMN_2225595 | ACAD8    | -0.20 | 8.26  | -4.81 | 5.39E-06 | 5.40E-05 | 3.52 |
| ILMN_3258321 | SNRPG    | 0.25  | 8.18  | 4.81  | 5.43E-06 | 5.43E-05 | 3.52 |
| ILMN_1808011 | FAM46B   | 0.19  | 6.45  | 4.81  | 5.45E-06 | 5.45E-05 | 3.51 |
| ILMN_3283032 | CERCAM   | 0.15  | 6.63  | 4.81  | 5.47E-06 | 5.47E-05 | 3.51 |
| ILMN_1660027 | FCGR2B   | 0.34  | 7.48  | 4.81  | 5.51E-06 | 5.51E-05 | 3.50 |
| ILMN_1662331 | PDSS2    | -0.22 | 8.43  | -4.81 | 5.51E-06 | 5.51E-05 | 3.50 |
| ILMN_2378100 | FBXL5    | 0.27  | 8.48  | 4.81  | 5.53E-06 | 5.53E-05 | 3.50 |
| ILMN_1758864 | VNN2     | 0.24  | 6.49  | 4.81  | 5.54E-06 | 5.53E-05 | 3.50 |
| ILMN_1673953 | HRH1     | 0.18  | 6.96  | 4.81  | 5.57E-06 | 5.56E-05 | 3.49 |



|              |           |       |       |       |          |          |      |
|--------------|-----------|-------|-------|-------|----------|----------|------|
| ILMN_1804571 | ZKSCAN4   | -0.16 | 7.01  | -4.80 | 5.58E-06 | 5.57E-05 | 3.49 |
| ILMN_1781906 | RBM17     | -0.18 | 8.97  | -4.80 | 5.59E-06 | 5.58E-05 | 3.49 |
| ILMN_3226276 | SEC14L1P1 | -0.13 | 6.74  | -4.80 | 5.59E-06 | 5.58E-05 | 3.49 |
| ILMN_1743402 | SIX4      | 0.14  | 6.50  | 4.80  | 5.62E-06 | 5.60E-05 | 3.48 |
| ILMN_1677122 | FAM168B   | -0.19 | 7.67  | -4.80 | 5.63E-06 | 5.61E-05 | 3.48 |
| ILMN_1671046 | HSPB2     | 0.15  | 6.52  | 4.80  | 5.64E-06 | 5.62E-05 | 3.48 |
| ILMN_1813374 | MFSD12    | 0.20  | 6.88  | 4.80  | 5.67E-06 | 5.65E-05 | 3.47 |
| ILMN_1663080 | LFNG      | -0.43 | 9.19  | -4.80 | 5.68E-06 | 5.66E-05 | 3.47 |
| ILMN_1722502 | CCT6A     | 0.22  | 8.59  | 4.80  | 5.68E-06 | 5.66E-05 | 3.47 |
| ILMN_2341611 | CDCP1     | -0.19 | 7.16  | -4.80 | 5.69E-06 | 5.66E-05 | 3.47 |
| ILMN_1742074 | C8orf76   | 0.19  | 9.35  | 4.80  | 5.73E-06 | 5.70E-05 | 3.46 |
| ILMN_1764494 | ATP5A1    | -0.21 | 12.11 | -4.80 | 5.74E-06 | 5.71E-05 | 3.46 |
| ILMN_3190972 | DSTNP2    | 0.13  | 6.76  | 4.80  | 5.74E-06 | 5.71E-05 | 3.46 |
| ILMN_1693210 | NSMCE2    | 0.16  | 7.18  | 4.80  | 5.76E-06 | 5.73E-05 | 3.46 |
| ILMN_2336781 | SOD2      | 0.64  | 9.04  | 4.80  | 5.76E-06 | 5.73E-05 | 3.46 |
| ILMN_1686981 | SULF2     | 0.19  | 7.09  | 4.80  | 5.79E-06 | 5.75E-05 | 3.45 |
| ILMN_1655497 | EIF4B     | 0.23  | 11.07 | 4.79  | 5.81E-06 | 5.77E-05 | 3.45 |
| ILMN_2232520 | ANKRD28   | 0.24  | 7.64  | 4.79  | 5.81E-06 | 5.77E-05 | 3.45 |
| ILMN_1709870 | HES2      | -0.25 | 6.83  | -4.79 | 5.84E-06 | 5.80E-05 | 3.45 |
| ILMN_2381697 | P4HA2     | -0.23 | 7.83  | -4.79 | 5.85E-06 | 5.80E-05 | 3.45 |
| ILMN_1651316 | CD69      | 0.28  | 6.88  | 4.79  | 5.86E-06 | 5.82E-05 | 3.44 |
| ILMN_1690923 | CAPN9     | -0.43 | 7.60  | -4.79 | 5.86E-06 | 5.82E-05 | 3.44 |
| ILMN_1741847 | MMP10     | 0.66  | 6.88  | 4.79  | 5.88E-06 | 5.83E-05 | 3.44 |
| ILMN_2141941 | TOR1AIP1  | 0.28  | 8.61  | 4.79  | 5.88E-06 | 5.83E-05 | 3.44 |
| ILMN_1807919 | TNS1      | 0.20  | 6.73  | 4.79  | 5.90E-06 | 5.84E-05 | 3.44 |
| ILMN_3240321 | AEN       | 0.23  | 7.09  | 4.79  | 5.90E-06 | 5.84E-05 | 3.44 |
| ILMN_1740572 | TCN2      | -0.27 | 7.33  | -4.79 | 5.91E-06 | 5.85E-05 | 3.43 |
| ILMN_2322972 | ZFYVE27   | -0.23 | 7.05  | -4.79 | 5.91E-06 | 5.85E-05 | 3.43 |
| ILMN_2364022 | SLC16A3   | -0.37 | 9.47  | -4.79 | 5.91E-06 | 5.85E-05 | 3.44 |
| ILMN_2101885 | TUBB      | 0.31  | 9.96  | 4.79  | 5.91E-06 | 5.85E-05 | 3.43 |
| ILMN_1692733 | NRARP     | -0.27 | 7.13  | -4.79 | 5.96E-06 | 5.90E-05 | 3.43 |
| ILMN_1736623 | NCKIPSD   | -0.16 | 7.26  | -4.79 | 5.98E-06 | 5.92E-05 | 3.42 |
| ILMN_1799819 | MARS      | 0.21  | 7.99  | 4.79  | 6.03E-06 | 5.96E-05 | 3.42 |
| ILMN_1734229 | SPPL2A    | -0.28 | 9.89  | -4.79 | 6.03E-06 | 5.96E-05 | 3.41 |
| ILMN_1652638 | NA        | 0.20  | 6.90  | 4.78  | 6.05E-06 | 5.98E-05 | 3.41 |
| ILMN_1684183 | RAD9A     | -0.19 | 7.08  | -4.78 | 6.06E-06 | 5.98E-05 | 3.41 |
| ILMN_1666269 | CTSZ      | -0.44 | 9.15  | -4.78 | 6.07E-06 | 5.99E-05 | 3.41 |
| ILMN_1742541 | ZNF518A   | -0.21 | 8.30  | -4.78 | 6.07E-06 | 5.99E-05 | 3.41 |
| ILMN_1696360 | CTSB      | 0.32  | 9.25  | 4.78  | 6.08E-06 | 6.00E-05 | 3.41 |
| ILMN_1688630 | RECK      | 0.20  | 7.05  | 4.78  | 6.09E-06 | 6.01E-05 | 3.41 |
| ILMN_1715069 | TANK      | 0.25  | 8.54  | 4.79  | 6.09E-06 | 6.01E-05 | 3.41 |
| ILMN_1815283 | NA        | -0.38 | 8.41  | -4.78 | 6.13E-06 | 6.05E-05 | 3.40 |
| ILMN_1708743 | NT5DC2    | 0.24  | 7.03  | 4.78  | 6.15E-06 | 6.06E-05 | 3.40 |
| ILMN_1750256 | ALS2      | 0.24  | 8.06  | 4.78  | 6.16E-06 | 6.07E-05 | 3.40 |
| ILMN_1693242 | ZNF296    | -0.22 | 7.46  | -4.78 | 6.16E-06 | 6.07E-05 | 3.40 |
| ILMN_3220934 | NA        | 0.18  | 6.60  | 4.78  | 6.17E-06 | 6.07E-05 | 3.39 |
| ILMN_2080342 | LGALS9C   | -0.20 | 6.51  | -4.78 | 6.17E-06 | 6.08E-05 | 3.39 |
| ILMN_1764694 | ZFP14     | -0.19 | 7.02  | -4.78 | 6.18E-06 | 6.08E-05 | 3.39 |

|              |          |       |       |       |          |          |      |
|--------------|----------|-------|-------|-------|----------|----------|------|
| ILMN_1657509 | TSEN54   | -0.18 | 7.00  | -4.78 | 6.25E-06 | 6.15E-05 | 3.38 |
| ILMN_1758311 | NET1     | -0.37 | 10.78 | -4.78 | 6.26E-06 | 6.16E-05 | 3.38 |
| ILMN_1693394 | BCKDK    | 0.21  | 8.85  | 4.78  | 6.26E-06 | 6.16E-05 | 3.38 |
| ILMN_1737644 | TMEM219  | -0.23 | 8.67  | -4.78 | 6.27E-06 | 6.16E-05 | 3.38 |
| ILMN_1804938 | TPRA1    | -0.17 | 7.42  | -4.77 | 6.30E-06 | 6.19E-05 | 3.37 |
| ILMN_1848552 | NFIB     | 0.25  | 9.38  | 4.78  | 6.30E-06 | 6.19E-05 | 3.38 |
| ILMN_1656395 | MYOT     | 0.33  | 7.25  | 4.77  | 6.30E-06 | 6.19E-05 | 3.37 |
| ILMN_1782890 | SLC25A3  | -0.18 | 11.88 | -4.77 | 6.33E-06 | 6.22E-05 | 3.37 |
| ILMN_1665004 | CASC3    | 0.19  | 8.35  | 4.77  | 6.37E-06 | 6.25E-05 | 3.36 |
| ILMN_1744211 | PLA2G4F  | -0.33 | 7.36  | -4.77 | 6.37E-06 | 6.25E-05 | 3.36 |
| ILMN_1694219 | ARIH1    | 0.20  | 7.06  | 4.77  | 6.39E-06 | 6.27E-05 | 3.36 |
| ILMN_2189668 | NUDT11   | 0.14  | 6.60  | 4.77  | 6.41E-06 | 6.28E-05 | 3.36 |
| ILMN_1750092 | SEPSECS  | -0.19 | 7.08  | -4.77 | 6.47E-06 | 6.34E-05 | 3.35 |
| ILMN_1802628 | PLPP6    | -0.25 | 7.92  | -4.77 | 6.46E-06 | 6.34E-05 | 3.35 |
| ILMN_1808196 | GSTO1    | 0.30  | 9.62  | 4.77  | 6.52E-06 | 6.39E-05 | 3.34 |
| ILMN_2096654 | COMMD4   | -0.18 | 8.82  | -4.77 | 6.53E-06 | 6.40E-05 | 3.34 |
| ILMN_1701413 | PIGQ     | -0.19 | 7.76  | -4.77 | 6.55E-06 | 6.42E-05 | 3.34 |
| ILMN_1654287 | ADCY9    | -0.24 | 7.34  | -4.76 | 6.57E-06 | 6.43E-05 | 3.33 |
| ILMN_1690703 | MIR99AHG | 0.15  | 6.52  | 4.76  | 6.61E-06 | 6.47E-05 | 3.33 |
| ILMN_1699071 | MAP3K7CL | 0.25  | 7.28  | 4.76  | 6.61E-06 | 6.47E-05 | 3.33 |
| ILMN_2396813 | BABAM1   | -0.16 | 7.36  | -4.76 | 6.62E-06 | 6.48E-05 | 3.33 |
| ILMN_1785902 | C1QC     | 0.78  | 9.40  | 4.76  | 6.65E-06 | 6.51E-05 | 3.32 |
| ILMN_2277676 | ERCC1    | 0.21  | 8.00  | 4.76  | 6.66E-06 | 6.52E-05 | 3.32 |
| ILMN_1682996 | VWA5A    | -0.20 | 7.27  | -4.76 | 6.73E-06 | 6.58E-05 | 3.32 |
| ILMN_1734543 | PTPRE    | 0.26  | 8.32  | 4.76  | 6.75E-06 | 6.59E-05 | 3.31 |
| ILMN_1728779 | NGLY1    | -0.18 | 8.53  | -4.76 | 6.76E-06 | 6.61E-05 | 3.31 |
| ILMN_2063584 | CLIC4    | 0.27  | 7.09  | 4.76  | 6.78E-06 | 6.62E-05 | 3.30 |
| ILMN_1669114 | WNK4     | -0.42 | 8.02  | -4.76 | 6.79E-06 | 6.63E-05 | 3.30 |
| ILMN_1659415 | LAMTOR3  | -0.15 | 9.68  | -4.76 | 6.81E-06 | 6.65E-05 | 3.30 |
| ILMN_1782944 | GPR37L1  | -0.13 | 6.44  | -4.75 | 6.82E-06 | 6.66E-05 | 3.30 |
| ILMN_1769219 | TPSG1    | -0.50 | 8.09  | -4.75 | 6.84E-06 | 6.67E-05 | 3.29 |
| ILMN_1813197 | SLITRK6  | -0.14 | 6.44  | -4.75 | 6.84E-06 | 6.67E-05 | 3.29 |
| ILMN_1655468 | DSG3     | 0.26  | 6.59  | 4.75  | 6.85E-06 | 6.68E-05 | 3.29 |
| ILMN_1653220 | PITPNM1  | 0.27  | 8.82  | 4.75  | 6.88E-06 | 6.71E-05 | 3.29 |
| ILMN_1795300 | ARHGEF37 | -0.19 | 7.00  | -4.75 | 6.92E-06 | 6.75E-05 | 3.28 |
| ILMN_1661424 | THAP6    | -0.13 | 7.00  | -4.75 | 6.96E-06 | 6.78E-05 | 3.28 |
| ILMN_1759729 | NDUFA8   | -0.30 | 10.17 | -4.75 | 6.96E-06 | 6.78E-05 | 3.28 |
| ILMN_2382403 | FCGR2B   | 0.16  | 6.67  | 4.75  | 7.00E-06 | 6.82E-05 | 3.27 |
| ILMN_1703718 | CCT7     | 0.22  | 8.20  | 4.75  | 7.01E-06 | 6.82E-05 | 3.27 |
| ILMN_1660186 | SYF2     | -0.21 | 9.09  | -4.75 | 7.02E-06 | 6.83E-05 | 3.28 |
| ILMN_1669094 | ZNF672   | -0.20 | 7.92  | -4.75 | 7.04E-06 | 6.85E-05 | 3.27 |
| ILMN_1665859 | RAB27A   | -0.31 | 7.69  | -4.75 | 7.07E-06 | 6.88E-05 | 3.27 |
| ILMN_1724495 | SESTD1   | 0.26  | 7.61  | 4.75  | 7.08E-06 | 6.88E-05 | 3.26 |
| ILMN_1769091 | PRCP     | 0.25  | 10.21 | 4.74  | 7.11E-06 | 6.91E-05 | 3.26 |
| ILMN_1804327 | NAP1L4   | 0.24  | 9.34  | 4.74  | 7.13E-06 | 6.93E-05 | 3.26 |
| ILMN_1757877 | HCFC1R1  | 0.21  | 8.59  | 4.75  | 7.13E-06 | 6.93E-05 | 3.26 |
| ILMN_2066020 | TCEB1    | 0.23  | 9.89  | 4.74  | 7.14E-06 | 6.93E-05 | 3.25 |
| ILMN_2399463 | VAV3     | -1.27 | 8.61  | -4.74 | 7.14E-06 | 6.93E-05 | 3.25 |

|              |          |       |       |       |          |          |      |
|--------------|----------|-------|-------|-------|----------|----------|------|
| ILMN_2363065 | RTN3     | -0.24 | 8.79  | -4.74 | 7.15E-06 | 6.94E-05 | 3.25 |
| ILMN_1709611 | PSMA1    | 0.19  | 10.23 | 4.74  | 7.19E-06 | 6.98E-05 | 3.25 |
| ILMN_1655137 | ZCCHC11  | 0.24  | 7.56  | 4.74  | 7.20E-06 | 6.99E-05 | 3.24 |
| ILMN_2414878 | STXBP1   | 0.17  | 6.75  | 4.74  | 7.21E-06 | 6.99E-05 | 3.24 |
| ILMN_3246037 | ASPG     | -0.23 | 6.55  | -4.74 | 7.22E-06 | 7.00E-05 | 3.24 |
| ILMN_1741954 | SMYD3    | 0.20  | 7.51  | 4.74  | 7.22E-06 | 7.00E-05 | 3.24 |
| ILMN_2406267 | MARVELD2 | -0.17 | 6.82  | -4.74 | 7.24E-06 | 7.01E-05 | 3.24 |
| ILMN_1771652 | BAIAP2L2 | -0.43 | 10.20 | -4.74 | 7.25E-06 | 7.02E-05 | 3.24 |
| ILMN_2341487 | C11orf49 | -0.20 | 7.04  | -4.74 | 7.27E-06 | 7.04E-05 | 3.24 |
| ILMN_1753467 | SAMD4B   | 0.16  | 6.99  | 4.74  | 7.28E-06 | 7.05E-05 | 3.24 |
| ILMN_1701361 | LURAP1L  | 0.21  | 7.05  | 4.74  | 7.28E-06 | 7.05E-05 | 3.23 |
| ILMN_1731639 | CASP3    | -0.16 | 6.75  | -4.74 | 7.32E-06 | 7.08E-05 | 3.23 |
| ILMN_1719579 | NA       | -0.16 | 6.68  | -4.74 | 7.37E-06 | 7.13E-05 | 3.22 |
| ILMN_1660847 | PFKFB3   | 0.38  | 7.16  | 4.73  | 7.40E-06 | 7.15E-05 | 3.22 |
| ILMN_1805216 | GPC6     | 0.19  | 7.58  | 4.73  | 7.40E-06 | 7.15E-05 | 3.22 |
| ILMN_1714445 | SLC6A9   | -0.26 | 7.07  | -4.73 | 7.42E-06 | 7.17E-05 | 3.22 |
| ILMN_1770936 | COQ5     | -0.28 | 9.09  | -4.73 | 7.42E-06 | 7.17E-05 | 3.22 |
| ILMN_1762993 | PIGV     | -0.27 | 7.53  | -4.73 | 7.43E-06 | 7.18E-05 | 3.22 |
| ILMN_1773059 | ADGRA2   | 0.25  | 7.16  | 4.74  | 7.44E-06 | 7.19E-05 | 3.22 |
| ILMN_1679984 | ZCCHC12  | 0.14  | 6.34  | 4.73  | 7.46E-06 | 7.20E-05 | 3.21 |
| ILMN_1781386 | WIPI1    | -0.30 | 7.93  | -4.73 | 7.46E-06 | 7.20E-05 | 3.21 |
| ILMN_1800634 | NME4     | 0.30  | 8.37  | 4.73  | 7.47E-06 | 7.21E-05 | 3.21 |
| ILMN_1787256 | HCN3     | -0.20 | 6.90  | -4.73 | 7.48E-06 | 7.22E-05 | 3.21 |
| ILMN_2331205 | NA       | -0.26 | 8.45  | -4.73 | 7.49E-06 | 7.22E-05 | 3.21 |
| ILMN_2115677 | LRIT2    | -0.16 | 6.49  | -4.73 | 7.52E-06 | 7.25E-05 | 3.21 |
| ILMN_2060413 | CD24     | -0.36 | 12.94 | -4.73 | 7.53E-06 | 7.26E-05 | 3.20 |
| ILMN_1671554 | LPIN1    | 0.39  | 8.96  | 4.73  | 7.55E-06 | 7.28E-05 | 3.20 |
| ILMN_1699208 | NAP1L1   | 0.36  | 8.71  | 4.73  | 7.60E-06 | 7.32E-05 | 3.19 |
| ILMN_3234997 | MAP7D1   | 0.23  | 7.38  | 4.73  | 7.62E-06 | 7.34E-05 | 3.20 |
| ILMN_1745172 | ILF2     | 0.20  | 9.86  | 4.73  | 7.63E-06 | 7.34E-05 | 3.19 |
| ILMN_1807423 | IGF2BP3  | 0.19  | 6.46  | 4.73  | 7.69E-06 | 7.41E-05 | 3.18 |
| ILMN_1678478 | CHST5    | -0.33 | 7.47  | -4.72 | 7.80E-06 | 7.51E-05 | 3.17 |
| ILMN_1662843 | CD53     | 0.38  | 7.18  | 4.72  | 7.83E-06 | 7.54E-05 | 3.16 |
| ILMN_1766551 | CPA3     | 0.92  | 8.62  | 4.72  | 7.85E-06 | 7.55E-05 | 3.16 |
| ILMN_1806607 | SFN      | 0.46  | 8.68  | 4.72  | 7.88E-06 | 7.57E-05 | 3.16 |
| ILMN_2292178 | CLEC12A  | 0.14  | 6.41  | 4.72  | 7.88E-06 | 7.58E-05 | 3.16 |
| ILMN_3230241 | NA       | -0.18 | 6.80  | -4.72 | 7.88E-06 | 7.58E-05 | 3.16 |
| ILMN_1689336 | HOXA10   | -0.25 | 7.93  | -4.72 | 7.89E-06 | 7.59E-05 | 3.16 |
| ILMN_1652246 | NACAD    | 0.18  | 6.84  | 4.72  | 7.91E-06 | 7.60E-05 | 3.16 |
| ILMN_1670912 | ACVR2A   | -0.18 | 6.84  | -4.72 | 7.93E-06 | 7.62E-05 | 3.15 |
| ILMN_2363361 | SFXN4    | -0.28 | 8.23  | -4.72 | 7.94E-06 | 7.62E-05 | 3.15 |
| ILMN_1753472 | SUMF1    | -0.24 | 8.24  | -4.72 | 7.95E-06 | 7.63E-05 | 3.15 |
| ILMN_2167808 | TM4SF5   | -0.50 | 8.13  | -4.72 | 7.96E-06 | 7.64E-05 | 3.15 |
| ILMN_1662364 | AARS     | 0.23  | 10.07 | 4.72  | 8.01E-06 | 7.69E-05 | 3.15 |
| ILMN_1743199 | EGR2     | 0.42  | 7.13  | 4.71  | 8.02E-06 | 7.69E-05 | 3.14 |
| ILMN_1748915 | S100A12  | 0.31  | 6.49  | 4.71  | 8.03E-06 | 7.70E-05 | 3.14 |
| ILMN_1668194 | LMTK3    | 0.30  | 7.01  | 4.71  | 8.04E-06 | 7.70E-05 | 3.14 |
| ILMN_1806809 | ZNF189   | 0.21  | 8.03  | 4.71  | 8.04E-06 | 7.70E-05 | 3.14 |

|              |          |       |       |       |          |          |      |
|--------------|----------|-------|-------|-------|----------|----------|------|
| ILMN_2084059 | SLC12A4  | 0.14  | 6.62  | 4.72  | 8.04E-06 | 7.70E-05 | 3.14 |
| ILMN_1781207 | FYN      | 0.20  | 6.72  | 4.71  | 8.05E-06 | 7.71E-05 | 3.14 |
| ILMN_1732216 | NARS     | -0.21 | 10.43 | -4.71 | 8.05E-06 | 7.71E-05 | 3.14 |
| ILMN_1739161 | PLPP1    | -0.27 | 8.39  | -4.71 | 8.05E-06 | 7.71E-05 | 3.14 |
| ILMN_1659462 | DUSP23   | -0.22 | 9.38  | -4.71 | 8.08E-06 | 7.73E-05 | 3.14 |
| ILMN_1674522 | HIGD1A   | -0.34 | 11.82 | -4.71 | 8.07E-06 | 7.73E-05 | 3.14 |
| ILMN_2401618 | MLX      | -0.21 | 7.66  | -4.71 | 8.11E-06 | 7.75E-05 | 3.13 |
| ILMN_3248324 | NA       | -0.20 | 7.30  | -4.71 | 8.12E-06 | 7.77E-05 | 3.13 |
| ILMN_2369018 | EVI2A    | 0.18  | 6.55  | 4.71  | 8.14E-06 | 7.78E-05 | 3.13 |
| ILMN_1811560 | SUGP1    | -0.17 | 8.02  | -4.71 | 8.15E-06 | 7.79E-05 | 3.13 |
| ILMN_1652525 | MVB12B   | -0.20 | 7.31  | -4.71 | 8.16E-06 | 7.79E-05 | 3.13 |
| ILMN_1766712 | TCF21    | 0.37  | 7.42  | 4.71  | 8.16E-06 | 7.79E-05 | 3.13 |
| ILMN_1716246 | FRZB     | -0.40 | 9.10  | -4.71 | 8.17E-06 | 7.80E-05 | 3.12 |
| ILMN_2309245 | BIN1     | 0.25  | 8.33  | 4.71  | 8.17E-06 | 7.80E-05 | 3.12 |
| ILMN_2161577 | CXCL6    | 0.29  | 6.61  | 4.71  | 8.20E-06 | 7.82E-05 | 3.12 |
| ILMN_1783909 | COL6A2   | 0.37  | 7.96  | 4.71  | 8.20E-06 | 7.83E-05 | 3.12 |
| ILMN_1762712 | HHEX     | 0.25  | 7.03  | 4.71  | 8.25E-06 | 7.87E-05 | 3.11 |
| ILMN_2086612 | CMAHP    | -0.35 | 7.41  | -4.71 | 8.28E-06 | 7.89E-05 | 3.11 |
| ILMN_2229379 | KIT      | 0.42  | 7.71  | 4.71  | 8.28E-06 | 7.89E-05 | 3.11 |
| ILMN_2374115 | TFAP2A   | 0.21  | 6.46  | 4.71  | 8.28E-06 | 7.89E-05 | 3.11 |
| ILMN_2194627 | GMCL1    | -0.21 | 7.68  | -4.71 | 8.28E-06 | 7.89E-05 | 3.11 |
| ILMN_1754195 | RPL31    | 0.18  | 12.62 | 4.71  | 8.30E-06 | 7.91E-05 | 3.11 |
| ILMN_3240247 | NOP10    | 0.19  | 10.99 | 4.70  | 8.35E-06 | 7.95E-05 | 3.10 |
| ILMN_1687998 | LPGAT1   | 0.21  | 7.33  | 4.71  | 8.36E-06 | 7.95E-05 | 3.11 |
| ILMN_1754149 | LETMD1   | -0.21 | 8.32  | -4.70 | 8.37E-06 | 7.97E-05 | 3.10 |
| ILMN_3283573 | RPL4     | 0.20  | 12.23 | 4.70  | 8.37E-06 | 7.97E-05 | 3.10 |
| ILMN_2317493 | SEMA6D   | -0.13 | 6.57  | -4.70 | 8.39E-06 | 7.98E-05 | 3.10 |
| ILMN_1789007 | APOC1    | 0.49  | 7.62  | 4.70  | 8.39E-06 | 7.98E-05 | 3.10 |
| ILMN_1803464 | PHTF1    | 0.18  | 7.36  | 4.70  | 8.47E-06 | 8.05E-05 | 3.09 |
| ILMN_2413259 | SOCS4    | 0.22  | 7.99  | 4.70  | 8.48E-06 | 8.06E-05 | 3.09 |
| ILMN_1762262 | PKIA     | 0.16  | 6.53  | 4.70  | 8.49E-06 | 8.07E-05 | 3.09 |
| ILMN_2096604 | FAM192A  | -0.14 | 7.01  | -4.70 | 8.55E-06 | 8.12E-05 | 3.09 |
| ILMN_2415949 | MRRF     | -0.17 | 7.56  | -4.70 | 8.58E-06 | 8.15E-05 | 3.08 |
| ILMN_1759232 | IRS1     | 0.25  | 7.17  | 4.70  | 8.59E-06 | 8.15E-05 | 3.08 |
| ILMN_1768575 | SFTPD    | -0.47 | 7.53  | -4.70 | 8.64E-06 | 8.19E-05 | 3.07 |
| ILMN_1666845 | KRT17    | 0.45  | 6.64  | 4.70  | 8.64E-06 | 8.20E-05 | 3.07 |
| ILMN_1803744 | VIMP     | -0.24 | 9.21  | -4.70 | 8.66E-06 | 8.21E-05 | 3.07 |
| ILMN_1752669 | ALPI     | -0.19 | 6.71  | -4.70 | 8.67E-06 | 8.22E-05 | 3.07 |
| ILMN_1795826 | ATP6VOD1 | -0.29 | 8.92  | -4.69 | 8.69E-06 | 8.24E-05 | 3.07 |
| ILMN_1680814 | EDN2     | -0.17 | 6.62  | -4.69 | 8.71E-06 | 8.25E-05 | 3.06 |
| ILMN_1697420 | TINF2    | 0.41  | 8.52  | 4.69  | 8.72E-06 | 8.26E-05 | 3.06 |
| ILMN_2234016 | FTH1     | -0.24 | 13.44 | -4.69 | 8.75E-06 | 8.29E-05 | 3.06 |
| ILMN_1810423 | RPP40    | 0.27  | 8.33  | 4.70  | 8.75E-06 | 8.29E-05 | 3.06 |
| ILMN_1672128 | ATF4     | 0.22  | 11.58 | 4.69  | 8.77E-06 | 8.31E-05 | 3.06 |
| ILMN_1677843 | RAB24    | -0.27 | 8.94  | -4.69 | 8.79E-06 | 8.32E-05 | 3.05 |
| ILMN_1654010 | AGPAT3   | -0.14 | 6.73  | -4.69 | 8.80E-06 | 8.33E-05 | 3.05 |
| ILMN_1721651 | UBE2H    | 0.25  | 6.93  | 4.69  | 8.82E-06 | 8.34E-05 | 3.05 |
| ILMN_2150258 | ZFP36L2  | 0.39  | 9.06  | 4.69  | 8.84E-06 | 8.36E-05 | 3.05 |

|              |          |       |       |       |          |          |      |
|--------------|----------|-------|-------|-------|----------|----------|------|
| ILMN_1727284 | CD4      | 0.21  | 6.74  | 4.69  | 8.89E-06 | 8.40E-05 | 3.04 |
| ILMN_2150586 | ZNF536   | 0.16  | 6.58  | 4.69  | 8.92E-06 | 8.43E-05 | 3.04 |
| ILMN_1692511 | TMEM106C | -0.34 | 10.14 | -4.69 | 8.93E-06 | 8.44E-05 | 3.04 |
| ILMN_1684321 | CYB5B    | -0.20 | 10.93 | -4.69 | 8.94E-06 | 8.44E-05 | 3.04 |
| ILMN_1673305 | RHOC     | -0.28 | 10.56 | -4.69 | 8.98E-06 | 8.48E-05 | 3.03 |
| ILMN_1673522 | MOCOS    | 0.39  | 7.23  | 4.69  | 9.00E-06 | 8.49E-05 | 3.03 |
| ILMN_2413650 | STIL     | -0.22 | 7.43  | -4.69 | 9.02E-06 | 8.52E-05 | 3.03 |
| ILMN_1715705 | SSNA1    | -0.18 | 7.46  | -4.68 | 9.09E-06 | 8.57E-05 | 3.02 |
| ILMN_2312296 | PCBP2    | 0.14  | 11.35 | 4.68  | 9.09E-06 | 8.57E-05 | 3.02 |
| ILMN_1668946 | USH1C    | -0.24 | 7.28  | -4.68 | 9.12E-06 | 8.60E-05 | 3.02 |
| ILMN_1657836 | PLEKHG2  | 0.14  | 6.53  | 4.68  | 9.19E-06 | 8.66E-05 | 3.01 |
| ILMN_1894072 | NA       | 0.45  | 7.71  | 4.68  | 9.20E-06 | 8.67E-05 | 3.01 |
| ILMN_1738589 | MGLL     | -0.24 | 7.52  | -4.68 | 9.22E-06 | 8.69E-05 | 3.01 |
| ILMN_2375002 | MAP4K4   | 0.17  | 6.90  | 4.68  | 9.23E-06 | 8.69E-05 | 3.01 |
| ILMN_1752281 | DNAJC13  | -0.14 | 7.55  | -4.68 | 9.27E-06 | 8.73E-05 | 3.00 |
| ILMN_1675038 | PRMT2    | -0.21 | 7.81  | -4.68 | 9.28E-06 | 8.73E-05 | 3.00 |
| ILMN_1763344 | ADCYAP1  | 0.12  | 6.30  | 4.68  | 9.28E-06 | 8.73E-05 | 3.00 |
| ILMN_1808391 | DUSP4    | 0.16  | 6.32  | 4.68  | 9.28E-06 | 8.74E-05 | 3.00 |
| ILMN_2115434 | RAB32    | -0.25 | 9.02  | -4.68 | 9.29E-06 | 8.74E-05 | 3.00 |
| ILMN_1812297 | CYP26B1  | 0.22  | 7.05  | 4.68  | 9.29E-06 | 8.74E-05 | 3.00 |
| ILMN_1812856 | ZSWIM1   | -0.14 | 8.05  | -4.68 | 9.33E-06 | 8.77E-05 | 3.00 |
| ILMN_3226904 | NOP2     | 0.18  | 6.97  | 4.68  | 9.39E-06 | 8.83E-05 | 2.99 |
| ILMN_1669881 | TSPAN13  | -0.39 | 10.34 | -4.67 | 9.40E-06 | 8.84E-05 | 2.99 |
| ILMN_1684620 | SPAG4    | 0.25  | 6.69  | 4.67  | 9.41E-06 | 8.84E-05 | 2.99 |
| ILMN_1695590 | ADRB2    | 0.22  | 7.05  | 4.67  | 9.43E-06 | 8.85E-05 | 2.99 |
| ILMN_1713829 | PTGES    | 0.23  | 6.84  | 4.67  | 9.43E-06 | 8.85E-05 | 2.99 |
| ILMN_2164242 | UBE2F    | 0.20  | 8.88  | 4.67  | 9.43E-06 | 8.85E-05 | 2.99 |
| ILMN_2400947 | CELF2    | 0.20  | 7.08  | 4.67  | 9.45E-06 | 8.87E-05 | 2.99 |
| ILMN_1717855 | PFDN1    | 0.19  | 8.27  | 4.67  | 9.45E-06 | 8.87E-05 | 2.98 |
| ILMN_1786024 | POLR3H   | 0.14  | 6.98  | 4.67  | 9.48E-06 | 8.89E-05 | 2.98 |
| ILMN_1709772 | SNX5     | -0.20 | 8.32  | -4.67 | 9.50E-06 | 8.90E-05 | 2.98 |
| ILMN_1702175 | ST7      | 0.19  | 7.16  | 4.67  | 9.50E-06 | 8.91E-05 | 2.98 |
| ILMN_1806790 | ROBO1    | 0.20  | 6.78  | 4.67  | 9.51E-06 | 8.91E-05 | 2.98 |
| ILMN_3265193 | NA       | 0.20  | 6.63  | 4.67  | 9.52E-06 | 8.92E-05 | 2.98 |
| ILMN_1790317 | RAB26    | -0.33 | 7.17  | -4.67 | 9.58E-06 | 8.97E-05 | 2.97 |
| ILMN_1703650 | TNIP1    | -0.26 | 8.57  | -4.67 | 9.58E-06 | 8.97E-05 | 2.97 |
| ILMN_2189314 | HDGFL1   | -0.14 | 6.58  | -4.67 | 9.62E-06 | 9.01E-05 | 2.97 |
| ILMN_1715324 | HSD17B8  | -0.32 | 7.95  | -4.69 | 9.62E-06 | 9.01E-05 | 3.01 |
| ILMN_1771987 | SLC44A2  | -0.24 | 9.39  | -4.67 | 9.63E-06 | 9.01E-05 | 2.97 |
| ILMN_1652846 | PCYT2    | -0.20 | 7.22  | -4.67 | 9.75E-06 | 9.12E-05 | 2.96 |
| ILMN_1668092 | ESAM     | 0.29  | 7.38  | 4.67  | 9.77E-06 | 9.14E-05 | 2.95 |
| ILMN_1754600 | FNBP1L   | -0.27 | 8.53  | -4.66 | 9.81E-06 | 9.17E-05 | 2.95 |
| ILMN_3244516 | HECTD4   | -0.17 | 8.04  | -4.66 | 9.82E-06 | 9.18E-05 | 2.95 |
| ILMN_1685378 | RPS7     | 0.31  | 10.32 | 4.66  | 9.85E-06 | 9.21E-05 | 2.95 |
| ILMN_1813344 | NDUFAF5  | -0.16 | 8.47  | -4.66 | 9.86E-06 | 9.21E-05 | 2.94 |
| ILMN_3239284 | B9D1     | 0.12  | 6.62  | 4.66  | 9.88E-06 | 9.23E-05 | 2.94 |
| ILMN_1670640 | ZNF664   | -0.16 | 6.93  | -4.66 | 9.91E-06 | 9.25E-05 | 2.94 |
| ILMN_1690610 | RALY     | -0.20 | 9.06  | -4.66 | 1.00E-05 | 9.34E-05 | 2.93 |

|              |           |       |       |       |          |           |      |
|--------------|-----------|-------|-------|-------|----------|-----------|------|
| ILMN_2391419 | SYNE2     | -0.31 | 8.26  | -4.66 | 1.00E-05 | 9.36E-05  | 2.93 |
| ILMN_1694634 | MOGAT3    | -0.25 | 7.17  | -4.65 | 1.02E-05 | 9.50E-05  | 2.91 |
| ILMN_1809040 | LDLRAP1   | -0.17 | 6.93  | -4.65 | 1.02E-05 | 9.50E-05  | 2.91 |
| ILMN_2211003 | GAS2L3    | -0.19 | 6.94  | -4.65 | 1.02E-05 | 9.51E-05  | 2.91 |
| ILMN_2400322 | DYRK3     | 0.12  | 6.42  | 4.65  | 1.02E-05 | 9.51E-05  | 2.91 |
| ILMN_1811178 | SCAPER    | -0.18 | 7.18  | -4.65 | 1.02E-05 | 9.52E-05  | 2.91 |
| ILMN_1791792 | TIGAR     | 0.23  | 7.14  | 4.65  | 1.02E-05 | 9.52E-05  | 2.91 |
| ILMN_2171384 | CXCL5     | 0.52  | 6.72  | 4.65  | 1.03E-05 | 9.56E-05  | 2.91 |
| ILMN_1709936 | LYRM7     | -0.14 | 6.91  | -4.65 | 1.03E-05 | 9.60E-05  | 2.90 |
| ILMN_1672389 | CRYZ      | 0.33  | 8.61  | 4.66  | 1.03E-05 | 9.63E-05  | 2.91 |
| ILMN_1739770 | MED7      | -0.17 | 7.49  | -4.65 | 1.03E-05 | 9.63E-05  | 2.90 |
| ILMN_1830984 | NA        | -0.18 | 7.56  | -4.65 | 1.04E-05 | 9.71E-05  | 2.89 |
| ILMN_1656840 | VPS13D    | -0.16 | 6.90  | -4.65 | 1.05E-05 | 9.73E-05  | 2.89 |
| ILMN_1678170 | MME       | 0.40  | 6.88  | 4.65  | 1.05E-05 | 9.75E-05  | 2.89 |
| ILMN_1813836 | DARS      | 0.20  | 10.58 | 4.65  | 1.05E-05 | 9.75E-05  | 2.89 |
| ILMN_2335718 | HNRNPAB   | -0.21 | 9.69  | -4.65 | 1.05E-05 | 9.79E-05  | 2.88 |
| ILMN_1809433 | XBP1      | 0.45  | 11.43 | 4.65  | 1.05E-05 | 9.79E-05  | 2.88 |
| ILMN_1757439 | NA        | -0.18 | 7.10  | -4.64 | 1.06E-05 | 9.86E-05  | 2.87 |
| ILMN_2379644 | CD74      | 0.72  | 10.60 | 4.64  | 1.06E-05 | 9.86E-05  | 2.87 |
| ILMN_1683044 | PPP1R2    | 0.19  | 8.93  | 4.64  | 1.06E-05 | 9.86E-05  | 2.87 |
| ILMN_1658437 | SFXN4     | -0.28 | 8.74  | -4.64 | 1.07E-05 | 9.94E-05  | 2.86 |
| ILMN_1703370 | ZDHC12    | -0.23 | 7.50  | -4.64 | 1.07E-05 | 9.94E-05  | 2.87 |
| ILMN_1721713 | EXOSC9    | 0.17  | 7.45  | 4.64  | 1.07E-05 | 9.94E-05  | 2.86 |
| ILMN_2332713 | SLC25A3   | -0.19 | 11.52 | -4.64 | 1.07E-05 | 9.94E-05  | 2.87 |
| ILMN_3277872 | BMS1      | 0.17  | 7.55  | 4.64  | 1.07E-05 | 9.95E-05  | 2.86 |
| ILMN_2397750 | IVNS1ABP  | -0.34 | 9.22  | -4.64 | 1.07E-05 | 9.96E-05  | 2.86 |
| ILMN_1689070 | COQ7      | -0.17 | 7.04  | -4.64 | 1.08E-05 | 9.98E-05  | 2.86 |
| ILMN_1671893 | CHMP2A    | -0.26 | 9.96  | -4.64 | 1.08E-05 | 9.99E-05  | 2.86 |
| ILMN_1745772 | ASCC3     | 0.29  | 8.16  | 4.64  | 1.08E-05 | 9.99E-05  | 2.86 |
| ILMN_2317463 | INTS1     | -0.19 | 8.13  | -4.64 | 1.08E-05 | 0.0001002 | 2.86 |
| ILMN_1763516 | SPINK2    | -0.19 | 6.64  | -4.64 | 1.09E-05 | 0.0001009 | 2.85 |
| ILMN_1752520 | SLFN11    | 0.43  | 8.45  | 4.64  | 1.09E-05 | 0.0001009 | 2.85 |
| ILMN_1685124 | TCTN1     | 0.19  | 7.42  | 4.64  | 1.09E-05 | 0.0001011 | 2.85 |
| ILMN_1787595 | B3GALNT1  | 0.13  | 6.55  | 4.64  | 1.09E-05 | 0.0001012 | 2.84 |
| ILMN_2052135 | LINC00312 | 0.21  | 6.70  | 4.64  | 1.10E-05 | 0.0001013 | 2.84 |
| ILMN_1722798 | PLCD3     | -0.29 | 7.53  | -4.63 | 1.10E-05 | 0.0001019 | 2.84 |
| ILMN_1662359 | NA        | -0.22 | 7.27  | -4.64 | 1.11E-05 | 0.0001023 | 2.85 |
| ILMN_2210729 | STYXL1    | -0.25 | 8.06  | -4.63 | 1.11E-05 | 0.0001025 | 2.83 |
| ILMN_1703441 | ZNF593    | 0.26  | 8.38  | 4.63  | 1.11E-05 | 0.0001026 | 2.83 |
| ILMN_1694877 | CASP6     | -0.21 | 7.27  | -4.63 | 1.12E-05 | 0.000103  | 2.83 |
| ILMN_1788783 | TRAM2     | 0.27  | 8.33  | 4.63  | 1.12E-05 | 0.0001035 | 2.82 |
| ILMN_1716468 | NUDT16P1  | -0.16 | 6.92  | -4.63 | 1.13E-05 | 0.0001041 | 2.82 |
| ILMN_3251620 | JMY       | 0.18  | 6.84  | 4.63  | 1.13E-05 | 0.0001041 | 2.82 |
| ILMN_1770911 | NRSN2     | 0.31  | 7.08  | 4.63  | 1.13E-05 | 0.0001043 | 2.81 |
| ILMN_1699496 | PHF21A    | 0.27  | 8.80  | 4.63  | 1.13E-05 | 0.0001045 | 2.81 |
| ILMN_1804870 | PRKG2     | -0.15 | 6.52  | -4.63 | 1.14E-05 | 0.0001046 | 2.81 |
| ILMN_1700606 | RNF43     | -0.17 | 6.93  | -4.63 | 1.14E-05 | 0.0001047 | 2.81 |
| ILMN_1746013 | SPOCK1    | 0.23  | 6.88  | 4.63  | 1.14E-05 | 0.000105  | 2.81 |

|              |          |       |       |       |          |           |      |
|--------------|----------|-------|-------|-------|----------|-----------|------|
| ILMN_1781151 | ARMC8    | 0.17  | 6.96  | 4.63  | 1.14E-05 | 0.000105  | 2.81 |
| ILMN_1800096 | MPST     | -0.28 | 7.28  | -4.62 | 1.15E-05 | 0.0001055 | 2.80 |
| ILMN_1653824 | LAMC2    | 0.38  | 7.33  | 4.62  | 1.15E-05 | 0.0001056 | 2.80 |
| ILMN_2399174 | TRAK1    | -0.28 | 8.07  | -4.62 | 1.15E-05 | 0.0001059 | 2.80 |
| ILMN_2156267 | EIF2AK1  | -0.18 | 10.41 | -4.62 | 1.15E-05 | 0.0001062 | 2.79 |
| ILMN_2155172 | BRIX1    | 0.23  | 7.50  | 4.62  | 1.16E-05 | 0.0001065 | 2.79 |
| ILMN_1788607 | RPL23A   | 0.21  | 7.94  | 4.62  | 1.16E-05 | 0.0001068 | 2.79 |
| ILMN_2213136 | LEF1     | 0.44  | 7.37  | 4.62  | 1.16E-05 | 0.0001071 | 2.79 |
| ILMN_1700831 | SLC27A2  | -0.35 | 8.45  | -4.62 | 1.17E-05 | 0.0001072 | 2.78 |
| ILMN_2267535 | NET1     | -0.34 | 7.29  | -4.62 | 1.17E-05 | 0.0001072 | 2.78 |
| ILMN_2364110 | GBA      | -0.28 | 8.59  | -4.62 | 1.17E-05 | 0.0001072 | 2.78 |
| ILMN_2376408 | DPM3     | -0.24 | 8.31  | -4.62 | 1.17E-05 | 0.0001073 | 2.78 |
| ILMN_3178406 | KLHL29   | 0.21  | 7.34  | 4.62  | 1.17E-05 | 0.0001074 | 2.78 |
| ILMN_1727249 | FAM21C   | -0.16 | 6.86  | -4.62 | 1.17E-05 | 0.0001074 | 2.78 |
| ILMN_2229940 | PRADC1   | -0.25 | 7.71  | -4.62 | 1.17E-05 | 0.0001074 | 2.78 |
| ILMN_1730628 | RNASE2   | 0.15  | 6.55  | 4.62  | 1.17E-05 | 0.0001075 | 2.78 |
| ILMN_1811370 | HSD11B1  | 0.11  | 6.39  | 4.62  | 1.17E-05 | 0.0001075 | 2.79 |
| ILMN_3289508 | NA       | 0.19  | 6.69  | 4.62  | 1.18E-05 | 0.0001086 | 2.77 |
| ILMN_1701403 | HIP1     | 0.14  | 6.68  | 4.62  | 1.19E-05 | 0.0001089 | 2.77 |
| ILMN_1761968 | PPP1R14A | 0.35  | 7.49  | 4.62  | 1.19E-05 | 0.000109  | 2.77 |
| ILMN_1690034 | SOD3     | 0.23  | 6.82  | 4.62  | 1.19E-05 | 0.000109  | 2.76 |
| ILMN_1712718 | BPNT1    | -0.24 | 7.41  | -4.61 | 1.20E-05 | 0.0001097 | 2.76 |
| ILMN_1758613 | RAPGEFL1 | -0.34 | 8.81  | -4.61 | 1.20E-05 | 0.0001097 | 2.76 |
| ILMN_3284584 | RPL10    | 0.24  | 11.27 | 4.61  | 1.21E-05 | 0.0001107 | 2.76 |
| ILMN_1781672 | GAB1     | -0.17 | 6.93  | -4.61 | 1.21E-05 | 0.0001107 | 2.75 |
| ILMN_1722329 | CASQ2    | 0.31  | 6.78  | 4.61  | 1.21E-05 | 0.0001108 | 2.75 |
| ILMN_1747460 | TMEM184B | 0.22  | 7.67  | 4.61  | 1.21E-05 | 0.0001109 | 2.75 |
| ILMN_1701558 | MAP1A    | 0.17  | 6.48  | 4.61  | 1.21E-05 | 0.0001111 | 2.75 |
| ILMN_1680081 | B3GNT6   | -0.42 | 7.90  | -4.61 | 1.22E-05 | 0.0001112 | 2.74 |
| ILMN_1792384 | HABP4    | 0.15  | 6.73  | 4.61  | 1.22E-05 | 0.0001115 | 2.74 |
| ILMN_2066849 | FAM26F   | 0.16  | 6.78  | 4.61  | 1.22E-05 | 0.0001116 | 2.75 |
| ILMN_1773935 | TMEM165  | 0.22  | 7.53  | 4.61  | 1.22E-05 | 0.0001118 | 2.74 |
| ILMN_1679134 | NSMCE4A  | -0.19 | 9.74  | -4.61 | 1.23E-05 | 0.0001121 | 2.74 |
| ILMN_1718558 | PARP12   | -0.39 | 8.63  | -4.61 | 1.23E-05 | 0.0001122 | 2.73 |
| ILMN_1741159 | MAP3K8   | 0.40  | 7.56  | 4.61  | 1.23E-05 | 0.0001123 | 2.73 |
| ILMN_1718924 | ETFA     | -0.28 | 10.33 | -4.61 | 1.23E-05 | 0.0001126 | 2.73 |
| ILMN_1773278 | OR8D4    | -0.14 | 6.40  | -4.61 | 1.23E-05 | 0.0001126 | 2.73 |
| ILMN_1790062 | OTULIN   | 0.19  | 7.37  | 4.61  | 1.24E-05 | 0.0001127 | 2.73 |
| ILMN_1762666 | DHRS4    | -0.20 | 7.29  | -4.60 | 1.24E-05 | 0.0001132 | 2.72 |
| ILMN_2282352 | PHYH     | -0.36 | 8.11  | -4.60 | 1.24E-05 | 0.0001133 | 2.72 |
| ILMN_3235514 | GPR183   | 0.15  | 6.56  | 4.60  | 1.25E-05 | 0.0001136 | 2.72 |
| ILMN_1657680 | CCDC69   | 0.18  | 6.65  | 4.60  | 1.25E-05 | 0.0001139 | 2.72 |
| ILMN_1732296 | ID3      | -0.36 | 9.26  | -4.60 | 1.25E-05 | 0.0001139 | 2.72 |
| ILMN_1761242 | COMMD1   | 0.19  | 9.04  | 4.60  | 1.26E-05 | 0.0001143 | 2.71 |
| ILMN_1676846 | ABCE1    | 0.26  | 7.66  | 4.60  | 1.27E-05 | 0.0001154 | 2.70 |
| ILMN_1654411 | CCL18    | 0.32  | 6.76  | 4.60  | 1.27E-05 | 0.0001156 | 2.70 |
| ILMN_1679318 | ARSJ     | 0.20  | 6.86  | 4.60  | 1.27E-05 | 0.0001156 | 2.70 |
| ILMN_1688621 | INIP     | -0.20 | 8.11  | -4.60 | 1.27E-05 | 0.0001159 | 2.71 |

|              |          |       |       |       |          |           |      |
|--------------|----------|-------|-------|-------|----------|-----------|------|
| ILMN_2188862 | GDF15    | 0.42  | 7.42  | 4.60  | 1.27E-05 | 0.0001159 | 2.70 |
| ILMN_3238435 | SNORA12  | 0.54  | 8.03  | 4.60  | 1.28E-05 | 0.0001161 | 2.70 |
| ILMN_2056975 | HPRT1    | 0.36  | 9.40  | 4.60  | 1.28E-05 | 0.0001162 | 2.70 |
| ILMN_2070355 | SDHAF1   | -0.18 | 7.79  | -4.60 | 1.28E-05 | 0.0001167 | 2.70 |
| ILMN_3249216 | PDX1     | 0.59  | 7.24  | 4.60  | 1.29E-05 | 0.0001167 | 2.69 |
| ILMN_1692056 | HS3ST3A1 | 0.26  | 7.06  | 4.60  | 1.29E-05 | 0.0001169 | 2.70 |
| ILMN_1748916 | TIMM21   | -0.20 | 8.22  | -4.60 | 1.29E-05 | 0.0001169 | 2.69 |
| ILMN_1695797 | NCOA6    | -0.19 | 9.48  | -4.60 | 1.29E-05 | 0.000117  | 2.69 |
| ILMN_2106331 | NA       | -0.20 | 12.62 | -4.59 | 1.29E-05 | 0.0001172 | 2.69 |
| ILMN_2225718 | CENPE    | 0.15  | 6.67  | 4.59  | 1.30E-05 | 0.0001183 | 2.68 |
| ILMN_2382121 | OCRL     | -0.19 | 7.95  | -4.59 | 1.31E-05 | 0.0001186 | 2.67 |
| ILMN_1676075 | KLHL12   | -0.17 | 7.51  | -4.59 | 1.31E-05 | 0.0001188 | 2.67 |
| ILMN_2119774 | CYP2R1   | -0.21 | 7.75  | -4.59 | 1.31E-05 | 0.0001189 | 2.67 |
| ILMN_1702447 | IGF2BP2  | -0.28 | 9.90  | -4.59 | 1.31E-05 | 0.000119  | 2.67 |
| ILMN_1691188 | UIMC1    | 0.19  | 8.70  | 4.59  | 1.31E-05 | 0.0001191 | 2.67 |
| ILMN_1790136 | MRGBP    | 0.17  | 8.20  | 4.59  | 1.32E-05 | 0.0001194 | 2.67 |
| ILMN_3245707 | RIMKLB   | 0.14  | 6.66  | 4.59  | 1.32E-05 | 0.0001194 | 2.67 |
| ILMN_1670903 | NAT2     | -0.38 | 8.12  | -4.59 | 1.32E-05 | 0.0001196 | 2.66 |
| ILMN_1829845 | NA       | -0.44 | 8.73  | -4.59 | 1.32E-05 | 0.0001196 | 2.66 |
| ILMN_1810488 | NFYC     | -0.22 | 8.07  | -4.59 | 1.32E-05 | 0.0001199 | 2.66 |
| ILMN_1731948 | PCK1     | -0.68 | 7.94  | -4.59 | 1.33E-05 | 0.0001199 | 2.66 |
| ILMN_1688515 | ZNF195   | -0.22 | 7.84  | -4.59 | 1.33E-05 | 0.0001199 | 2.67 |
| ILMN_1774685 | IL24     | 0.23  | 6.66  | 4.59  | 1.33E-05 | 0.00012   | 2.66 |
| ILMN_1727524 | ADAM9    | 0.22  | 7.09  | 4.59  | 1.33E-05 | 0.0001203 | 2.66 |
| ILMN_1731353 | CHPF     | 0.21  | 7.34  | 4.59  | 1.33E-05 | 0.0001203 | 2.66 |
| ILMN_1719986 | PIK3IP1  | 0.33  | 8.36  | 4.59  | 1.34E-05 | 0.0001207 | 2.65 |
| ILMN_1783182 | FBN1     | 0.13  | 6.51  | 4.59  | 1.34E-05 | 0.000121  | 2.65 |
| ILMN_2193214 | MPND     | -0.17 | 6.82  | -4.59 | 1.34E-05 | 0.000121  | 2.65 |
| ILMN_3251207 | TMEM19   | -0.20 | 7.63  | -4.58 | 1.34E-05 | 0.0001213 | 2.65 |
| ILMN_1688698 | ZEB2     | 0.32  | 7.62  | 4.58  | 1.35E-05 | 0.000122  | 2.64 |
| ILMN_1739622 | PPP1R12A | 0.22  | 7.44  | 4.58  | 1.36E-05 | 0.0001223 | 2.64 |
| ILMN_1690939 | TYMP     | 0.16  | 6.65  | 4.58  | 1.36E-05 | 0.0001224 | 2.64 |
| ILMN_1666512 | SKIV2L   | -0.22 | 8.21  | -4.58 | 1.36E-05 | 0.0001228 | 2.64 |
| ILMN_1744212 | INPP5D   | 0.40  | 7.39  | 4.58  | 1.37E-05 | 0.0001239 | 2.63 |
| ILMN_1792323 | HDC      | 0.45  | 7.67  | 4.58  | 1.38E-05 | 0.000124  | 2.63 |
| ILMN_1652512 | C2CD2    | 0.24  | 8.44  | 4.58  | 1.38E-05 | 0.0001245 | 2.62 |
| ILMN_1802292 | WDFY2    | 0.15  | 6.80  | 4.58  | 1.38E-05 | 0.0001247 | 2.62 |
| ILMN_2305112 | CTH      | -0.16 | 6.86  | -4.58 | 1.39E-05 | 0.0001252 | 2.62 |
| ILMN_1730961 | FCGBP    | -0.47 | 8.56  | -4.58 | 1.39E-05 | 0.0001253 | 2.62 |
| ILMN_2344221 | IGSF5    | -0.13 | 6.39  | -4.58 | 1.39E-05 | 0.0001255 | 2.61 |
| ILMN_1708059 | USP13    | 0.16  | 6.89  | 4.57  | 1.40E-05 | 0.0001259 | 2.61 |
| ILMN_1808707 | FSCN1    | 0.50  | 8.61  | 4.57  | 1.40E-05 | 0.0001259 | 2.61 |
| ILMN_1654516 | TMEM120A | -0.28 | 8.37  | -4.57 | 1.40E-05 | 0.0001262 | 2.61 |
| ILMN_1803825 | CXCL12   | 0.29  | 7.43  | 4.57  | 1.40E-05 | 0.0001262 | 2.61 |
| ILMN_1873621 | NTN1     | 0.18  | 6.80  | 4.57  | 1.40E-05 | 0.0001263 | 2.61 |
| ILMN_2362902 | RASSF5   | 0.40  | 8.62  | 4.57  | 1.41E-05 | 0.0001265 | 2.60 |
| ILMN_1798346 | KIAA1468 | -0.21 | 8.24  | -4.57 | 1.41E-05 | 0.0001265 | 2.60 |
| ILMN_1674302 | PPAT     | 0.20  | 7.33  | 4.57  | 1.41E-05 | 0.0001269 | 2.60 |



|              |          |       |       |       |          |           |      |
|--------------|----------|-------|-------|-------|----------|-----------|------|
| ILMN_1736597 | TKT      | 0.29  | 9.43  | 4.57  | 1.41E-05 | 0.0001269 | 2.60 |
| ILMN_2360730 | CAV2     | 0.19  | 6.97  | 4.57  | 1.41E-05 | 0.0001269 | 2.60 |
| ILMN_1882764 | NA       | -0.17 | 7.16  | -4.57 | 1.41E-05 | 0.0001269 | 2.60 |
| ILMN_2081335 | COA1     | 0.27  | 8.51  | 4.57  | 1.42E-05 | 0.0001272 | 2.60 |
| ILMN_2152711 | ACVR2A   | -0.22 | 7.44  | -4.57 | 1.42E-05 | 0.0001275 | 2.59 |
| ILMN_1708611 | RDX      | 0.28  | 7.80  | 4.57  | 1.43E-05 | 0.0001281 | 2.59 |
| ILMN_1709326 | NA       | -0.19 | 6.90  | -4.57 | 1.43E-05 | 0.0001281 | 2.60 |
| ILMN_1802973 | ANAPC4   | -0.23 | 8.64  | -4.57 | 1.44E-05 | 0.000129  | 2.58 |
| ILMN_1784540 | KBTBD2   | 0.19  | 9.19  | 4.57  | 1.44E-05 | 0.0001292 | 2.58 |
| ILMN_1729515 | PIN4     | -0.12 | 6.82  | -4.57 | 1.44E-05 | 0.0001292 | 2.58 |
| ILMN_1729294 | RNF130   | 0.24  | 8.05  | 4.57  | 1.45E-05 | 0.0001295 | 2.58 |
| ILMN_1763452 | EVI2B    | 0.60  | 8.14  | 4.57  | 1.45E-05 | 0.0001297 | 2.58 |
| ILMN_1786834 | PRKX     | -0.15 | 6.99  | -4.57 | 1.45E-05 | 0.0001297 | 2.58 |
| ILMN_1657949 | RHEB     | 0.25  | 9.76  | 4.57  | 1.45E-05 | 0.0001299 | 2.58 |
| ILMN_1807152 | GOLGA1   | -0.14 | 7.29  | -4.56 | 1.45E-05 | 0.00013   | 2.57 |
| ILMN_2073732 | CBLL1    | 0.17  | 7.80  | 4.56  | 1.45E-05 | 0.00013   | 2.57 |
| ILMN_1701512 | KIAA0391 | 0.17  | 8.56  | 4.56  | 1.46E-05 | 0.0001301 | 2.57 |
| ILMN_1789176 | PSMB1    | 0.18  | 11.57 | 4.57  | 1.45E-05 | 0.0001301 | 2.58 |
| ILMN_1771264 | ELL3     | -0.30 | 7.99  | -4.56 | 1.46E-05 | 0.0001301 | 2.57 |
| ILMN_2365569 | ICA1     | 0.30  | 7.99  | 4.56  | 1.46E-05 | 0.0001303 | 2.57 |
| ILMN_1903345 | NA       | -0.12 | 6.83  | -4.56 | 1.46E-05 | 0.0001304 | 2.57 |
| ILMN_1691798 | ZNF26    | 0.15  | 7.32  | 4.56  | 1.47E-05 | 0.000131  | 2.57 |
| ILMN_1714170 | SPSB1    | 0.25  | 7.33  | 4.56  | 1.47E-05 | 0.0001311 | 2.56 |
| ILMN_2144663 | GUCY2C   | -0.39 | 9.06  | -4.56 | 1.47E-05 | 0.0001311 | 2.56 |
| ILMN_1697567 | TPM3     | -0.30 | 8.28  | -4.56 | 1.48E-05 | 0.0001325 | 2.55 |
| ILMN_1736940 | HPRT1    | 0.33  | 8.36  | 4.56  | 1.49E-05 | 0.0001328 | 2.55 |
| ILMN_1741392 | SLC25A20 | -0.31 | 8.17  | -4.56 | 1.49E-05 | 0.0001332 | 2.55 |
| ILMN_2408566 | NR4A1    | 0.20  | 6.54  | 4.56  | 1.50E-05 | 0.0001333 | 2.55 |
| ILMN_1693287 | POMP     | 0.16  | 10.99 | 4.56  | 1.50E-05 | 0.0001336 | 2.54 |
| ILMN_1749892 | EGLN1    | -0.14 | 6.90  | -4.56 | 1.50E-05 | 0.0001336 | 2.54 |
| ILMN_1775257 | PROK2    | 0.59  | 6.78  | 4.56  | 1.50E-05 | 0.000134  | 2.54 |
| ILMN_1758852 | ENTPD7   | 0.18  | 7.01  | 4.56  | 1.51E-05 | 0.0001344 | 2.54 |
| ILMN_1764629 | SLC39A14 | -0.33 | 8.69  | -4.55 | 1.51E-05 | 0.0001349 | 2.53 |
| ILMN_1716342 | VPS50    | -0.18 | 7.38  | -4.55 | 1.52E-05 | 0.000135  | 2.53 |
| ILMN_2053415 | LDLR     | 0.54  | 10.15 | 4.55  | 1.52E-05 | 0.000135  | 2.53 |
| ILMN_1705468 | PIK3CA   | 0.15  | 6.91  | 4.55  | 1.52E-05 | 0.0001355 | 2.53 |
| ILMN_1801697 | SYNE4    | -0.19 | 6.80  | -4.55 | 1.53E-05 | 0.0001357 | 2.53 |
| ILMN_1689389 | SF3B5    | -0.23 | 9.45  | -4.55 | 1.53E-05 | 0.0001361 | 2.53 |
| ILMN_2359345 | NET1     | -0.36 | 7.81  | -4.56 | 1.53E-05 | 0.0001362 | 2.53 |
| ILMN_1811470 | PLEK2    | 0.35  | 8.23  | 4.55  | 1.54E-05 | 0.0001369 | 2.52 |
| ILMN_1722838 | MRPL46   | -0.17 | 8.05  | -4.55 | 1.54E-05 | 0.000137  | 2.52 |
| ILMN_1758673 | SLC44A1  | -0.35 | 8.68  | -4.55 | 1.54E-05 | 0.000137  | 2.52 |
| ILMN_1744210 | SDHA     | -0.38 | 9.14  | -4.55 | 1.55E-05 | 0.0001376 | 2.51 |
| ILMN_1779616 | SUCLG1   | -0.41 | 10.34 | -4.55 | 1.55E-05 | 0.0001376 | 2.52 |
| ILMN_2134974 | RAB38    | 0.18  | 6.87  | 4.55  | 1.55E-05 | 0.0001379 | 2.51 |
| ILMN_1693428 | TNNC2    | -0.20 | 6.64  | -4.55 | 1.55E-05 | 0.000138  | 2.51 |
| ILMN_3241446 | ODF3B    | 0.15  | 6.74  | 4.55  | 1.56E-05 | 0.000138  | 2.51 |
| ILMN_1656287 | SPOCK2   | 0.63  | 8.33  | 4.55  | 1.56E-05 | 0.000138  | 2.51 |

|              |          |       |       |       |          |           |      |
|--------------|----------|-------|-------|-------|----------|-----------|------|
| ILMN_1744929 | PTGER1   | 0.13  | 6.51  | 4.55  | 1.56E-05 | 0.0001382 | 2.51 |
| ILMN_1763568 | ZDHC16   | -0.19 | 9.40  | -4.55 | 1.56E-05 | 0.0001382 | 2.51 |
| ILMN_3243055 | NA       | 0.19  | 7.14  | 4.54  | 1.57E-05 | 0.0001395 | 2.50 |
| ILMN_1674297 | HCFC2    | 0.15  | 6.83  | 4.55  | 1.58E-05 | 0.0001399 | 2.51 |
| ILMN_1697544 | SLC25A29 | 0.17  | 6.88  | 4.54  | 1.58E-05 | 0.0001399 | 2.49 |
| ILMN_1794989 | TMEM191B | -0.21 | 6.71  | -4.54 | 1.58E-05 | 0.0001399 | 2.49 |
| ILMN_2230672 | MRPL18   | -0.17 | 9.27  | -4.54 | 1.59E-05 | 0.0001407 | 2.49 |
| ILMN_1767658 | RRS1     | 0.26  | 7.37  | 4.54  | 1.59E-05 | 0.0001409 | 2.49 |
| ILMN_1785218 | MTCH2    | -0.19 | 7.11  | -4.54 | 1.59E-05 | 0.0001409 | 2.49 |
| ILMN_2225698 | NDUFA10  | -0.26 | 7.78  | -4.54 | 1.59E-05 | 0.0001409 | 2.49 |
| ILMN_2041161 | DENND4A  | 0.15  | 6.85  | 4.54  | 1.60E-05 | 0.0001413 | 2.48 |
| ILMN_1707484 | GEMIN6   | 0.21  | 7.74  | 4.54  | 1.60E-05 | 0.0001418 | 2.48 |
| ILMN_1656386 | SEC24D   | 0.32  | 7.78  | 4.54  | 1.60E-05 | 0.0001419 | 2.48 |
| ILMN_1722522 | CCNT2    | -0.21 | 8.17  | -4.54 | 1.62E-05 | 0.0001431 | 2.47 |
| ILMN_1703430 | CCDC94   | -0.16 | 7.56  | -4.54 | 1.63E-05 | 0.0001436 | 2.47 |
| ILMN_1746465 | FJX1     | 0.20  | 6.72  | 4.54  | 1.63E-05 | 0.0001437 | 2.47 |
| ILMN_1764573 | XIST     | -1.19 | 8.01  | -4.53 | 1.64E-05 | 0.0001445 | 2.46 |
| ILMN_1722820 | KDELR3   | 0.40  | 8.10  | 4.53  | 1.64E-05 | 0.0001451 | 2.46 |
| ILMN_2366634 | PKM      | 0.27  | 8.84  | 4.53  | 1.64E-05 | 0.0001452 | 2.46 |
| ILMN_1710000 | PEX11G   | -0.22 | 7.28  | -4.53 | 1.65E-05 | 0.0001459 | 2.45 |
| ILMN_1814022 | NR1H3    | -0.28 | 8.28  | -4.53 | 1.66E-05 | 0.0001465 | 2.45 |
| ILMN_2056795 | USP9Y    | 0.17  | 6.50  | 4.53  | 1.66E-05 | 0.0001468 | 2.44 |
| ILMN_2350266 | FBXO46   | 0.13  | 6.83  | 4.53  | 1.66E-05 | 0.0001468 | 2.44 |
| ILMN_2169801 | TPSAB1   | 0.77  | 8.33  | 4.53  | 1.67E-05 | 0.0001474 | 2.44 |
| ILMN_1678814 | UBL5     | -0.14 | 6.94  | -4.53 | 1.68E-05 | 0.000148  | 2.44 |
| ILMN_1681703 | FOXO3    | 0.20  | 10.42 | 4.53  | 1.68E-05 | 0.0001484 | 2.43 |
| ILMN_1798372 | ANXA2P3  | 0.23  | 6.80  | 4.53  | 1.69E-05 | 0.0001485 | 2.43 |
| ILMN_1815306 | AP2A1    | 0.16  | 6.94  | 4.53  | 1.69E-05 | 0.0001488 | 2.43 |
| ILMN_1732343 | SIK3     | 0.21  | 8.77  | 4.53  | 1.69E-05 | 0.0001492 | 2.43 |
| ILMN_1682781 | TEAD2    | 0.28  | 8.38  | 4.53  | 1.70E-05 | 0.0001494 | 2.43 |
| ILMN_2368713 | NA       | 0.27  | 8.07  | 4.52  | 1.70E-05 | 0.0001499 | 2.42 |
| ILMN_1708936 | EXOSC3   | 0.19  | 8.74  | 4.52  | 1.71E-05 | 0.00015   | 2.42 |
| ILMN_1783231 | PLEKHB1  | 0.16  | 6.86  | 4.52  | 1.71E-05 | 0.00015   | 2.42 |
| ILMN_1861270 | KCNQ3    | 0.12  | 6.57  | 4.52  | 1.72E-05 | 0.000151  | 2.41 |
| ILMN_1660544 | ARRDC4   | -0.31 | 7.86  | -4.52 | 1.72E-05 | 0.0001511 | 2.41 |
| ILMN_1669898 | EGFL7    | 0.10  | 6.38  | 4.52  | 1.72E-05 | 0.0001511 | 2.42 |
| ILMN_1780222 | SLC6A7   | -0.21 | 6.91  | -4.52 | 1.72E-05 | 0.0001512 | 2.41 |
| ILMN_1673380 | GNG12    | -0.30 | 7.80  | -4.52 | 1.72E-05 | 0.0001512 | 2.41 |
| ILMN_1674160 | BIN1     | 0.21  | 8.35  | 4.52  | 1.72E-05 | 0.0001513 | 2.41 |
| ILMN_1745798 | GTF2F2   | 0.17  | 9.10  | 4.52  | 1.73E-05 | 0.0001516 | 2.41 |
| ILMN_1794598 | NA       | 0.20  | 6.68  | 4.52  | 1.73E-05 | 0.0001518 | 2.41 |
| ILMN_2345016 | PTGES2   | -0.22 | 7.70  | -4.52 | 1.74E-05 | 0.0001523 | 2.40 |
| ILMN_1746819 | C5       | 0.18  | 7.08  | 4.52  | 1.74E-05 | 0.0001525 | 2.40 |
| ILMN_1795778 | P4HA2    | -0.27 | 8.51  | -4.52 | 1.74E-05 | 0.0001525 | 2.40 |
| ILMN_1761069 | UVRAG    | 0.20  | 7.45  | 4.52  | 1.74E-05 | 0.0001525 | 2.40 |
| ILMN_1766637 | GLA      | 0.27  | 8.43  | 4.52  | 1.75E-05 | 0.0001532 | 2.40 |
| ILMN_2075476 | GIPC2    | -0.19 | 6.63  | -4.52 | 1.75E-05 | 0.0001533 | 2.40 |
| ILMN_1784110 | CDK18    | -0.22 | 7.02  | -4.52 | 1.75E-05 | 0.0001535 | 2.40 |

|              |           |       |       |       |          |           |      |
|--------------|-----------|-------|-------|-------|----------|-----------|------|
| ILMN_1660533 | RPN1      | 0.16  | 10.82 | 4.52  | 1.76E-05 | 0.0001539 | 2.39 |
| ILMN_1779401 | CHP1      | -0.29 | 10.42 | -4.52 | 1.76E-05 | 0.0001539 | 2.39 |
| ILMN_1658301 | FAM83E    | -0.39 | 8.11  | -4.52 | 1.76E-05 | 0.000154  | 2.40 |
| ILMN_2413599 | CALML4    | -0.21 | 7.06  | -4.52 | 1.76E-05 | 0.0001543 | 2.39 |
| ILMN_1808245 | SBSPON    | 0.39  | 6.96  | 4.52  | 1.76E-05 | 0.0001544 | 2.39 |
| ILMN_1791569 | PLXNA1    | 0.16  | 6.94  | 4.52  | 1.76E-05 | 0.0001544 | 2.39 |
| ILMN_1681263 | SPINK4    | 1.28  | 10.33 | 4.51  | 1.77E-05 | 0.0001546 | 2.39 |
| ILMN_1805658 | LTV1      | 0.23  | 8.72  | 4.51  | 1.77E-05 | 0.0001546 | 2.39 |
| ILMN_3207060 | RPL4      | 0.16  | 12.94 | 4.51  | 1.77E-05 | 0.0001546 | 2.39 |
| ILMN_1690922 | MAST2     | -0.26 | 7.26  | -4.52 | 1.77E-05 | 0.0001547 | 2.39 |
| ILMN_1763144 | NEU1      | -0.23 | 7.92  | -4.52 | 1.77E-05 | 0.0001548 | 2.39 |
| ILMN_1680774 | LOC728392 | 0.18  | 7.12  | 4.51  | 1.77E-05 | 0.000155  | 2.38 |
| ILMN_1655557 | INTS6     | 0.19  | 8.53  | 4.51  | 1.78E-05 | 0.0001552 | 2.38 |
| ILMN_1746408 | MIDN      | 0.21  | 8.94  | 4.51  | 1.78E-05 | 0.0001554 | 2.38 |
| ILMN_1784641 | NDUFA3    | -0.24 | 10.59 | -4.51 | 1.79E-05 | 0.0001564 | 2.37 |
| ILMN_1683127 | ZNF281    | 0.25  | 8.15  | 4.51  | 1.79E-05 | 0.0001564 | 2.37 |
| ILMN_1746720 | TTC39C    | 0.15  | 6.70  | 4.51  | 1.79E-05 | 0.0001564 | 2.37 |
| ILMN_1683660 | EIF3H     | 0.22  | 9.58  | 4.51  | 1.80E-05 | 0.0001567 | 2.37 |
| ILMN_3237926 | CCNJL     | -0.24 | 6.89  | -4.51 | 1.80E-05 | 0.0001569 | 2.37 |
| ILMN_1803956 | BOC       | 0.14  | 6.40  | 4.51  | 1.80E-05 | 0.0001571 | 2.37 |
| ILMN_1756767 | EIF5B     | 0.17  | 7.44  | 4.51  | 1.81E-05 | 0.0001581 | 2.36 |
| ILMN_1724145 | CBX4      | 0.20  | 7.09  | 4.51  | 1.81E-05 | 0.0001582 | 2.37 |
| ILMN_2393296 | GK        | 0.29  | 7.52  | 4.51  | 1.82E-05 | 0.0001586 | 2.36 |
| ILMN_2052383 | R3HDM1    | 0.14  | 6.69  | 4.51  | 1.82E-05 | 0.0001586 | 2.36 |
| ILMN_1762549 | ORAOV1    | -0.19 | 7.69  | -4.51 | 1.83E-05 | 0.0001596 | 2.35 |
| ILMN_2159859 | LYSMD4    | -0.21 | 7.89  | -4.51 | 1.83E-05 | 0.0001597 | 2.35 |
| ILMN_1713682 | FBXO11    | 0.19  | 8.91  | 4.50  | 1.84E-05 | 0.00016   | 2.35 |
| ILMN_1739640 | DCHS1     | 0.16  | 6.85  | 4.50  | 1.85E-05 | 0.0001606 | 2.35 |
| ILMN_1768958 | RASGRP1   | 0.31  | 6.84  | 4.50  | 1.85E-05 | 0.0001607 | 2.34 |
| ILMN_2091792 | ENTPD6    | -0.29 | 8.92  | -4.50 | 1.85E-05 | 0.000161  | 2.34 |
| ILMN_1709894 | CLPX      | 0.16  | 7.57  | 4.50  | 1.85E-05 | 0.0001611 | 2.34 |
| ILMN_1698258 | DNAJC8    | 0.16  | 10.20 | 4.50  | 1.86E-05 | 0.0001615 | 2.34 |
| ILMN_3226613 | CLEC2D    | 0.22  | 7.14  | 4.50  | 1.86E-05 | 0.0001615 | 2.34 |
| ILMN_2261627 | CTLA4     | 0.20  | 6.46  | 4.50  | 1.86E-05 | 0.0001616 | 2.34 |
| ILMN_1680339 | PDGFRL    | 0.19  | 6.77  | 4.50  | 1.86E-05 | 0.0001618 | 2.34 |
| ILMN_1671777 | FGF13     | 0.16  | 6.52  | 4.50  | 1.87E-05 | 0.0001621 | 2.33 |
| ILMN_1686388 | TPM3      | -0.28 | 7.74  | -4.50 | 1.87E-05 | 0.0001623 | 2.33 |
| ILMN_2409642 | TRO       | 0.17  | 6.91  | 4.50  | 1.87E-05 | 0.0001624 | 2.34 |
| ILMN_1677043 | AKR7A2    | -0.26 | 9.86  | -4.50 | 1.87E-05 | 0.0001626 | 2.33 |
| ILMN_1690327 | CLCN5     | -0.11 | 6.63  | -4.50 | 1.88E-05 | 0.0001633 | 2.33 |
| ILMN_1694466 | ZBED1     | -0.21 | 9.23  | -4.50 | 1.89E-05 | 0.0001638 | 2.32 |
| ILMN_2226324 | MPC1      | -0.21 | 10.73 | -4.50 | 1.89E-05 | 0.0001638 | 2.33 |
| ILMN_2347949 | G6PD      | 0.19  | 7.72  | 4.50  | 1.89E-05 | 0.0001639 | 2.32 |
| ILMN_3307772 | PACSIN2   | -0.24 | 7.45  | -4.50 | 1.89E-05 | 0.0001639 | 2.32 |
| ILMN_1681301 | AIM2      | 0.44  | 7.22  | 4.50  | 1.90E-05 | 0.0001643 | 2.32 |
| ILMN_1689655 | HLA-DRA   | 0.83  | 11.56 | 4.50  | 1.90E-05 | 0.0001645 | 2.32 |
| ILMN_1678904 | ENO3      | -0.18 | 7.24  | -4.50 | 1.90E-05 | 0.0001645 | 2.32 |
| ILMN_1698259 | TMEM100   | 0.25  | 7.10  | 4.50  | 1.90E-05 | 0.0001647 | 2.32 |

|              |          |       |       |       |          |           |      |
|--------------|----------|-------|-------|-------|----------|-----------|------|
| ILMN_1694711 | MAD2L1BP | -0.21 | 8.07  | -4.50 | 1.90E-05 | 0.0001647 | 2.32 |
| ILMN_2228732 | CCNG2    | 0.30  | 7.65  | 4.50  | 1.91E-05 | 0.0001652 | 2.31 |
| ILMN_1755741 | DACH1    | 0.34  | 7.91  | 4.49  | 1.91E-05 | 0.0001655 | 2.31 |
| ILMN_1653553 | C14orf80 | -0.19 | 7.16  | -4.50 | 1.92E-05 | 0.0001658 | 2.31 |
| ILMN_1717163 | F13A1    | 0.68  | 7.70  | 4.49  | 1.92E-05 | 0.0001661 | 2.31 |
| ILMN_1768284 | P2RY8    | 0.43  | 7.21  | 4.49  | 1.93E-05 | 0.0001667 | 2.30 |
| ILMN_1662483 | NA       | -0.16 | 6.73  | -4.49 | 1.93E-05 | 0.0001667 | 2.30 |
| ILMN_2157441 | HLA-DRA  | 0.80  | 12.23 | 4.49  | 1.93E-05 | 0.0001668 | 2.31 |
| ILMN_2140700 | CRIPAK   | -0.30 | 7.77  | -4.49 | 1.93E-05 | 0.0001668 | 2.30 |
| ILMN_1754491 | IYD      | -0.37 | 7.13  | -4.49 | 1.94E-05 | 0.0001672 | 2.31 |
| ILMN_1728845 | SMARCD1  | 0.16  | 8.62  | 4.49  | 1.94E-05 | 0.0001675 | 2.30 |
| ILMN_2047511 | ADAP1    | -0.30 | 10.61 | -4.49 | 1.94E-05 | 0.0001675 | 2.30 |
| ILMN_1745963 | FOLR2    | 0.31  | 7.07  | 4.49  | 1.94E-05 | 0.0001675 | 2.30 |
| ILMN_1672403 | ADAMTS8  | 0.15  | 6.71  | 4.49  | 1.95E-05 | 0.0001679 | 2.29 |
| ILMN_1815032 | SOX7     | 0.16  | 6.73  | 4.49  | 1.96E-05 | 0.0001687 | 2.29 |
| ILMN_1695041 | GATA6    | -0.16 | 6.71  | -4.49 | 1.96E-05 | 0.0001692 | 2.29 |
| ILMN_2053679 | ACADM    | -0.30 | 9.72  | -4.49 | 1.96E-05 | 0.0001692 | 2.29 |
| ILMN_2347798 | IFI6     | 0.43  | 7.84  | 4.49  | 1.97E-05 | 0.0001694 | 2.29 |
| ILMN_2355549 | NA       | 0.11  | 6.36  | 4.49  | 1.97E-05 | 0.0001699 | 2.28 |
| ILMN_1665384 | SH3BP5L  | -0.17 | 6.99  | -4.49 | 1.98E-05 | 0.000171  | 2.28 |
| ILMN_2337241 | RPS15A   | 0.23  | 11.74 | 4.48  | 1.99E-05 | 0.0001716 | 2.27 |
| ILMN_1760890 | SEPN1    | 0.22  | 8.18  | 4.48  | 1.99E-05 | 0.0001716 | 2.27 |
| ILMN_1656574 | PCGF6    | 0.19  | 7.56  | 4.48  | 2.00E-05 | 0.0001724 | 2.27 |
| ILMN_1717381 | HOXD1    | -0.39 | 7.56  | -4.48 | 2.01E-05 | 0.000173  | 2.26 |
| ILMN_1859787 | NA       | -0.18 | 6.85  | -4.48 | 2.01E-05 | 0.0001731 | 2.26 |
| ILMN_3307930 | RAN      | 0.32  | 10.23 | 4.48  | 2.02E-05 | 0.0001734 | 2.26 |
| ILMN_1717706 | PLK2     | 0.16  | 6.65  | 4.48  | 2.02E-05 | 0.0001734 | 2.26 |
| ILMN_2352724 | PIGN     | -0.20 | 7.89  | -4.48 | 2.02E-05 | 0.0001739 | 2.26 |
| ILMN_1662174 | ORMDL3   | -0.18 | 7.40  | -4.48 | 2.03E-05 | 0.0001741 | 2.26 |
| ILMN_2309228 | GPS1     | -0.14 | 7.10  | -4.48 | 2.03E-05 | 0.0001742 | 2.26 |
| ILMN_2396020 | DUSP6    | 0.33  | 9.56  | 4.48  | 2.04E-05 | 0.0001754 | 2.25 |
| ILMN_2380243 | SMAGP    | -0.26 | 7.94  | -4.48 | 2.04E-05 | 0.0001755 | 2.25 |
| ILMN_1798663 | MAB21L2  | 0.30  | 7.14  | 4.48  | 2.05E-05 | 0.0001761 | 2.25 |
| ILMN_2366864 | JUP      | -0.20 | 6.96  | -4.48 | 2.05E-05 | 0.0001763 | 2.24 |
| ILMN_1732187 | TMEM143  | -0.13 | 6.74  | -4.48 | 2.05E-05 | 0.0001763 | 2.24 |
| ILMN_1733956 | IARS     | 0.28  | 8.53  | 4.48  | 2.06E-05 | 0.0001768 | 2.24 |
| ILMN_3244157 | SNORD83B | 0.13  | 6.71  | 4.47  | 2.07E-05 | 0.0001773 | 2.24 |
| ILMN_1654319 | HAPLN3   | 0.18  | 6.49  | 4.47  | 2.07E-05 | 0.0001774 | 2.24 |
| ILMN_1761322 | FHOD3    | 0.15  | 6.54  | 4.48  | 2.07E-05 | 0.0001777 | 2.24 |
| ILMN_1784364 | STARD5   | -0.23 | 8.07  | -4.47 | 2.07E-05 | 0.0001778 | 2.23 |
| ILMN_3244611 | MXRA7    | 0.19  | 6.62  | 4.47  | 2.08E-05 | 0.000178  | 2.23 |
| ILMN_1695827 | PPP1CA   | -0.23 | 9.25  | -4.47 | 2.09E-05 | 0.000179  | 2.23 |
| ILMN_1724658 | BNIP3    | 0.24  | 7.64  | 4.47  | 2.10E-05 | 0.0001796 | 2.22 |
| ILMN_1732808 | TOX3     | -0.23 | 7.12  | -4.47 | 2.10E-05 | 0.0001802 | 2.23 |
| ILMN_1707310 | MGLL     | -0.13 | 6.55  | -4.47 | 2.11E-05 | 0.0001804 | 2.22 |
| ILMN_1802027 | MGST2    | -0.27 | 10.90 | -4.47 | 2.12E-05 | 0.0001812 | 2.21 |
| ILMN_1791057 | IFNAR2   | 0.22  | 7.52  | 4.47  | 2.13E-05 | 0.0001819 | 2.21 |
| ILMN_1770425 | CDIPT    | -0.19 | 7.71  | -4.47 | 2.13E-05 | 0.0001819 | 2.21 |

|              |           |       |       |       |          |           |      |
|--------------|-----------|-------|-------|-------|----------|-----------|------|
| ILMN_1659761 | SNX29     | 0.21  | 7.04  | 4.47  | 2.13E-05 | 0.000182  | 2.21 |
| ILMN_1802109 | KLHL29    | 0.20  | 7.04  | 4.47  | 2.13E-05 | 0.0001822 | 2.21 |
| ILMN_1669410 | CHGA      | -1.09 | 9.40  | -4.47 | 2.13E-05 | 0.0001824 | 2.21 |
| ILMN_1654032 | ZER1      | -0.17 | 6.93  | -4.47 | 2.13E-05 | 0.0001825 | 2.21 |
| ILMN_1726064 | PAK1IP1   | 0.23  | 8.17  | 4.47  | 2.14E-05 | 0.0001827 | 2.21 |
| ILMN_1801378 | COQ3      | -0.21 | 8.01  | -4.47 | 2.14E-05 | 0.000183  | 2.20 |
| ILMN_3244506 | CRSP8P    | 0.17  | 7.85  | 4.46  | 2.15E-05 | 0.0001834 | 2.20 |
| ILMN_3244521 | LINC00294 | -0.24 | 7.96  | -4.46 | 2.15E-05 | 0.0001834 | 2.20 |
| ILMN_3303101 | NA        | -0.25 | 7.44  | -4.46 | 2.15E-05 | 0.0001837 | 2.20 |
| ILMN_1748407 | NA        | -0.20 | 7.05  | -4.47 | 2.16E-05 | 0.000184  | 2.20 |
| ILMN_1776109 | ZNF622    | -0.22 | 9.10  | -4.46 | 2.16E-05 | 0.000184  | 2.20 |
| ILMN_1678494 | ZNF438    | 0.15  | 6.86  | 4.46  | 2.16E-05 | 0.0001845 | 2.19 |
| ILMN_1652379 | SUCLG2    | -0.34 | 10.50 | -4.46 | 2.17E-05 | 0.0001847 | 2.19 |
| ILMN_2133996 | SHE       | 0.23  | 7.06  | 4.46  | 2.17E-05 | 0.000185  | 2.19 |
| ILMN_1737255 | LRRRC75B  | -0.17 | 6.89  | -4.46 | 2.17E-05 | 0.0001851 | 2.19 |
| ILMN_1728202 | SLC35G2   | 0.15  | 6.52  | 4.46  | 2.18E-05 | 0.0001853 | 2.19 |
| ILMN_1767139 | NDUFA13   | -0.26 | 8.96  | -4.46 | 2.18E-05 | 0.0001854 | 2.19 |
| ILMN_1762972 | CHD9      | -0.17 | 9.76  | -4.46 | 2.18E-05 | 0.0001854 | 2.19 |
| ILMN_1775114 | ENTPD3    | 0.15  | 6.56  | 4.46  | 2.18E-05 | 0.0001854 | 2.19 |
| ILMN_2361570 | SNX14     | -0.17 | 8.97  | -4.46 | 2.18E-05 | 0.0001857 | 2.19 |
| ILMN_1671209 | SYTL2     | -0.15 | 6.77  | -4.46 | 2.19E-05 | 0.0001861 | 2.18 |
| ILMN_1762629 | ANO9      | -0.18 | 6.85  | -4.46 | 2.19E-05 | 0.0001862 | 2.18 |
| ILMN_1893511 | NA        | -0.15 | 7.60  | -4.46 | 2.20E-05 | 0.0001868 | 2.18 |
| ILMN_1772218 | HLA-DPA1  | 0.86  | 10.74 | 4.46  | 2.20E-05 | 0.000187  | 2.18 |
| ILMN_1731433 | AOC1      | -0.50 | 10.15 | -4.46 | 2.20E-05 | 0.0001875 | 2.18 |
| ILMN_1670302 | HK3       | 0.16  | 6.55  | 4.46  | 2.22E-05 | 0.0001889 | 2.17 |
| ILMN_2219712 | HMGB2     | 0.34  | 8.43  | 4.46  | 2.22E-05 | 0.0001889 | 2.17 |
| ILMN_1742432 | NELFB     | -0.21 | 7.91  | -4.46 | 2.23E-05 | 0.0001891 | 2.17 |
| ILMN_1682636 | CXCL2     | 0.54  | 7.11  | 4.45  | 2.23E-05 | 0.0001894 | 2.16 |
| ILMN_1812403 | BCAP31    | -0.23 | 9.90  | -4.45 | 2.23E-05 | 0.0001894 | 2.16 |
| ILMN_2112829 | ANKAR     | -0.17 | 6.84  | -4.45 | 2.23E-05 | 0.0001896 | 2.16 |
| ILMN_1795762 | PLEK      | 0.53  | 7.61  | 4.45  | 2.24E-05 | 0.0001898 | 2.16 |
| ILMN_2226415 | MZT1      | 0.16  | 6.69  | 4.45  | 2.24E-05 | 0.00019   | 2.16 |
| ILMN_2408543 | PLAUR     | 0.33  | 7.24  | 4.45  | 2.25E-05 | 0.0001911 | 2.16 |
| ILMN_1671263 | CACNA1H   | 0.28  | 7.29  | 4.45  | 2.26E-05 | 0.0001913 | 2.15 |
| ILMN_1776998 | DNAJA4    | -0.20 | 8.97  | -4.45 | 2.26E-05 | 0.0001916 | 2.16 |
| ILMN_2057566 | PGP       | -0.15 | 6.75  | -4.45 | 2.26E-05 | 0.0001916 | 2.15 |
| ILMN_1756326 | CKS2      | 0.34  | 8.16  | 4.45  | 2.26E-05 | 0.0001918 | 2.15 |
| ILMN_1660871 | NEK6      | 0.22  | 7.63  | 4.45  | 2.27E-05 | 0.0001921 | 2.15 |
| ILMN_1685625 | UCP2      | 0.51  | 7.74  | 4.45  | 2.27E-05 | 0.0001924 | 2.15 |
| ILMN_1804656 | COX14     | -0.17 | 7.68  | -4.45 | 2.28E-05 | 0.0001933 | 2.14 |
| ILMN_1763080 | QARS      | -0.21 | 11.30 | -4.45 | 2.30E-05 | 0.0001945 | 2.14 |
| ILMN_2216815 | MAP7      | -0.28 | 8.98  | -4.45 | 2.31E-05 | 0.0001952 | 2.13 |
| ILMN_1768293 | NUP155    | 0.18  | 7.39  | 4.45  | 2.31E-05 | 0.0001953 | 2.13 |
| ILMN_1676296 | PLPP1     | -0.15 | 7.05  | -4.45 | 2.32E-05 | 0.0001959 | 2.13 |
| ILMN_1666385 | CALM3     | -0.16 | 11.62 | -4.45 | 2.32E-05 | 0.000196  | 2.13 |
| ILMN_1724497 | ABI2      | 0.17  | 7.14  | 4.44  | 2.32E-05 | 0.0001961 | 2.13 |
| ILMN_1813055 | MBNL1-AS1 | 0.21  | 6.71  | 4.44  | 2.33E-05 | 0.0001966 | 2.12 |

|              |           |       |       |       |          |           |      |
|--------------|-----------|-------|-------|-------|----------|-----------|------|
| ILMN_2066858 | TNFSF13B  | 0.37  | 8.09  | 4.44  | 2.33E-05 | 0.0001966 | 2.12 |
| ILMN_1773567 | LAMA5     | 0.41  | 9.58  | 4.45  | 2.33E-05 | 0.0001967 | 2.13 |
| ILMN_1801633 | ROMO1     | -0.17 | 11.12 | -4.44 | 2.33E-05 | 0.0001972 | 2.12 |
| ILMN_3246538 | PDE4DIP   | 0.18  | 7.03  | 4.44  | 2.33E-05 | 0.0001972 | 2.12 |
| ILMN_1748555 | FAM90A10P | -0.18 | 6.79  | -4.44 | 2.34E-05 | 0.0001976 | 2.12 |
| ILMN_1763640 | NCKAP5L   | 0.13  | 6.80  | 4.44  | 2.35E-05 | 0.0001983 | 2.12 |
| ILMN_3219455 | HSPD1     | 0.34  | 8.50  | 4.44  | 2.35E-05 | 0.0001983 | 2.11 |
| ILMN_2363586 | SDCBP     | 0.28  | 9.58  | 4.44  | 2.35E-05 | 0.0001984 | 2.11 |
| ILMN_1814015 | CDH17     | -0.47 | 12.18 | -4.44 | 2.36E-05 | 0.0001987 | 2.12 |
| ILMN_1737146 | TRAM1     | 0.20  | 11.48 | 4.44  | 2.36E-05 | 0.000199  | 2.11 |
| ILMN_1651684 | KIAA0586  | 0.13  | 7.02  | 4.44  | 2.36E-05 | 0.0001992 | 2.11 |
| ILMN_1716276 | NA        | 0.54  | 7.13  | 4.44  | 2.36E-05 | 0.0001993 | 2.11 |
| ILMN_3301763 | NA        | 0.20  | 6.56  | 4.44  | 2.37E-05 | 0.0001997 | 2.11 |
| ILMN_1727495 | L3MBTL3   | 0.16  | 7.15  | 4.44  | 2.39E-05 | 0.000201  | 2.10 |
| ILMN_1704055 | NA        | 0.22  | 7.25  | 4.44  | 2.39E-05 | 0.0002014 | 2.10 |
| ILMN_1659926 | ST7L      | 0.14  | 6.53  | 4.44  | 2.39E-05 | 0.0002014 | 2.10 |
| ILMN_1720287 | E4F1      | -0.20 | 8.82  | -4.44 | 2.40E-05 | 0.0002017 | 2.10 |
| ILMN_2198393 | KATNA1    | 0.14  | 8.02  | 4.44  | 2.40E-05 | 0.0002017 | 2.10 |
| ILMN_1698668 | NR1D2     | -0.23 | 6.93  | -4.44 | 2.41E-05 | 0.0002025 | 2.10 |
| ILMN_2073010 | TMEM203   | -0.17 | 8.37  | -4.44 | 2.41E-05 | 0.0002026 | 2.09 |
| ILMN_1758315 | SLC9A9    | 0.24  | 6.97  | 4.43  | 2.42E-05 | 0.0002033 | 2.09 |
| ILMN_1725773 | DNAJC12   | 0.18  | 6.61  | 4.43  | 2.42E-05 | 0.0002038 | 2.09 |
| ILMN_1656129 | SLC39A10  | 0.17  | 6.83  | 4.43  | 2.44E-05 | 0.0002049 | 2.08 |
| ILMN_1808354 | SLC4A7    | 0.24  | 6.97  | 4.43  | 2.44E-05 | 0.0002052 | 2.08 |
| ILMN_1677483 | EXOSC1    | -0.19 | 7.51  | -4.43 | 2.44E-05 | 0.0002052 | 2.08 |
| ILMN_1788062 | SH3GL1    | 0.12  | 7.06  | 4.43  | 2.44E-05 | 0.0002052 | 2.08 |
| ILMN_1652407 | ZMYND8    | -0.19 | 7.89  | -4.43 | 2.44E-05 | 0.0002053 | 2.08 |
| ILMN_1666178 | TP53I13   | -0.29 | 8.96  | -4.43 | 2.45E-05 | 0.0002056 | 2.08 |
| ILMN_1709132 | ELP2      | 0.17  | 7.90  | 4.43  | 2.45E-05 | 0.0002057 | 2.08 |
| ILMN_1669700 | KPNA5     | 0.11  | 6.39  | 4.43  | 2.46E-05 | 0.0002061 | 2.07 |
| ILMN_2264634 | UTY       | 0.15  | 6.50  | 4.43  | 2.46E-05 | 0.0002061 | 2.07 |
| ILMN_1681269 | DYRK4     | 0.21  | 8.16  | 4.43  | 2.46E-05 | 0.0002061 | 2.07 |
| ILMN_1705953 | LONRF1    | 0.18  | 7.02  | 4.43  | 2.46E-05 | 0.0002061 | 2.07 |
| ILMN_1659843 | DNAJC3    | 0.18  | 6.87  | 4.43  | 2.47E-05 | 0.0002067 | 2.07 |
| ILMN_2203544 | OR2A9P    | -0.24 | 7.04  | -4.43 | 2.48E-05 | 0.0002078 | 2.07 |
| ILMN_2220283 | HNRNPA1P1 | 0.23  | 8.30  | 4.43  | 2.48E-05 | 0.0002078 | 2.06 |
| ILMN_1763091 | ELMSAN1   | -0.24 | 8.86  | -4.43 | 2.48E-05 | 0.0002081 | 2.06 |
| ILMN_2409167 | ANXA2     | 0.35  | 12.56 | 4.43  | 2.49E-05 | 0.0002083 | 2.06 |
| ILMN_1774250 | BPIFA1    | -0.12 | 6.50  | -4.43 | 2.49E-05 | 0.0002085 | 2.06 |
| ILMN_2162860 | SLFN11    | 0.30  | 7.36  | 4.43  | 2.49E-05 | 0.0002086 | 2.06 |
| ILMN_1654151 | COX6C     | -0.18 | 12.10 | -4.43 | 2.50E-05 | 0.0002089 | 2.06 |
| ILMN_1805104 | ABAT      | -0.18 | 6.69  | -4.43 | 2.50E-05 | 0.0002092 | 2.06 |
| ILMN_1797307 | BUB1B     | 0.17  | 6.83  | 4.43  | 2.50E-05 | 0.0002093 | 2.06 |
| ILMN_1787345 | FKBP11    | 0.48  | 9.08  | 4.43  | 2.51E-05 | 0.0002096 | 2.06 |
| ILMN_2331062 | CBFA2T2   | -0.15 | 7.10  | -4.42 | 2.51E-05 | 0.0002098 | 2.05 |
| ILMN_1713031 | CPQ       | 0.20  | 7.06  | 4.43  | 2.52E-05 | 0.0002109 | 2.05 |
| ILMN_1775742 | RNF128    | -0.32 | 8.03  | -4.42 | 2.53E-05 | 0.0002114 | 2.05 |
| ILMN_1706505 | COL5A1    | 0.39  | 9.05  | 4.42  | 2.53E-05 | 0.0002117 | 2.04 |

|              |          |       |       |       |          |           |      |
|--------------|----------|-------|-------|-------|----------|-----------|------|
| ILMN_1758778 | CNTRL    | 0.22  | 7.12  | 4.42  | 2.54E-05 | 0.0002121 | 2.04 |
| ILMN_2349658 | TSPO     | -0.26 | 9.48  | -4.42 | 2.54E-05 | 0.0002121 | 2.04 |
| ILMN_1736692 | SRL      | 0.14  | 6.59  | 4.42  | 2.55E-05 | 0.0002127 | 2.04 |
| ILMN_2367428 | FAM96A   | -0.26 | 8.82  | -4.42 | 2.55E-05 | 0.0002129 | 2.04 |
| ILMN_1712687 | PAK2     | 0.21  | 8.51  | 4.42  | 2.55E-05 | 0.000213  | 2.04 |
| ILMN_1699980 | TSPAN18  | 0.19  | 6.83  | 4.42  | 2.56E-05 | 0.0002134 | 2.03 |
| ILMN_3275388 | ASS1     | -0.40 | 8.07  | -4.42 | 2.56E-05 | 0.0002134 | 2.03 |
| ILMN_1750373 | ANOS1    | 0.12  | 6.47  | 4.42  | 2.56E-05 | 0.0002137 | 2.03 |
| ILMN_2182531 | TIMM21   | -0.24 | 9.41  | -4.42 | 2.57E-05 | 0.000214  | 2.03 |
| ILMN_1659688 | LGALS3BP | -0.32 | 9.17  | -4.42 | 2.57E-05 | 0.0002142 | 2.03 |
| ILMN_1717636 | RGMA     | 0.39  | 7.62  | 4.42  | 2.58E-05 | 0.000215  | 2.03 |
| ILMN_2405915 | MRPS11   | -0.18 | 8.02  | -4.42 | 2.58E-05 | 0.0002151 | 2.03 |
| ILMN_2290808 | RPL21    | 0.24  | 11.27 | 4.42  | 2.58E-05 | 0.0002151 | 2.03 |
| ILMN_1801441 | RFTN2    | 0.19  | 6.85  | 4.42  | 2.59E-05 | 0.0002159 | 2.02 |
| ILMN_3199483 | DGAT1    | -0.15 | 6.65  | -4.42 | 2.59E-05 | 0.000216  | 2.02 |
| ILMN_1773780 | FAM173A  | -0.19 | 7.92  | -4.42 | 2.60E-05 | 0.0002162 | 2.02 |
| ILMN_2414325 | TNFAIP8  | 0.35  | 7.48  | 4.41  | 2.61E-05 | 0.0002168 | 2.02 |
| ILMN_2379718 | RAB24    | -0.24 | 7.99  | -4.41 | 2.61E-05 | 0.0002171 | 2.02 |
| ILMN_1711608 | SSBP2    | 0.21  | 7.38  | 4.41  | 2.63E-05 | 0.0002183 | 2.01 |
| ILMN_3204275 | SARNP    | 0.13  | 7.04  | 4.41  | 2.63E-05 | 0.0002183 | 2.01 |
| ILMN_1776515 | MPPE1    | -0.29 | 9.12  | -4.41 | 2.63E-05 | 0.0002184 | 2.01 |
| ILMN_1777096 | TDG      | 0.15  | 9.46  | 4.41  | 2.63E-05 | 0.0002188 | 2.01 |
| ILMN_1785113 | MUT      | -0.24 | 8.86  | -4.41 | 2.64E-05 | 0.0002195 | 2.00 |
| ILMN_1691333 | ZNF57    | -0.14 | 6.77  | -4.41 | 2.66E-05 | 0.0002209 | 2.00 |
| ILMN_1703894 | NA       | -0.21 | 6.98  | -4.41 | 2.67E-05 | 0.0002214 | 2.00 |
| ILMN_2388701 | ST3GALS5 | 0.18  | 6.85  | 4.41  | 2.68E-05 | 0.0002221 | 1.99 |
| ILMN_1690546 | PPP3CC   | 0.25  | 7.63  | 4.41  | 2.68E-05 | 0.0002222 | 1.99 |
| ILMN_2211780 | SLC25A4  | -0.25 | 9.31  | -4.41 | 2.68E-05 | 0.0002226 | 1.99 |
| ILMN_1695413 | ZNF429   | -0.12 | 6.46  | -4.41 | 2.70E-05 | 0.000224  | 1.98 |
| ILMN_1778886 | ZNF345   | -0.14 | 6.76  | -4.41 | 2.70E-05 | 0.0002241 | 1.98 |
| ILMN_1744822 | BECN1    | -0.20 | 8.93  | -4.41 | 2.70E-05 | 0.0002241 | 1.98 |
| ILMN_1790534 | MAP2K3   | 0.31  | 8.32  | 4.41  | 2.70E-05 | 0.0002241 | 1.98 |
| ILMN_1811114 | SDS      | 0.23  | 6.65  | 4.40  | 2.72E-05 | 0.0002255 | 1.98 |
| ILMN_1756693 | ARHGAP17 | -0.10 | 6.49  | -4.40 | 2.72E-05 | 0.0002256 | 1.97 |
| ILMN_3285198 | SET      | 0.19  | 10.91 | 4.40  | 2.73E-05 | 0.0002264 | 1.97 |
| ILMN_2194561 | PLEKHG1  | 0.24  | 7.14  | 4.40  | 2.74E-05 | 0.0002271 | 1.97 |
| ILMN_2081988 | LANCL1   | 0.26  | 8.89  | 4.40  | 2.74E-05 | 0.0002272 | 1.97 |
| ILMN_1764362 | LYAR     | 0.26  | 7.45  | 4.40  | 2.75E-05 | 0.0002279 | 1.96 |
| ILMN_2190084 | VAMP8    | -0.32 | 10.91 | -4.40 | 2.76E-05 | 0.0002282 | 1.96 |
| ILMN_1741688 | CPXM2    | 0.25  | 7.12  | 4.40  | 2.76E-05 | 0.0002287 | 1.96 |
| ILMN_1752923 | IFNAR1   | -0.18 | 7.94  | -4.40 | 2.76E-05 | 0.0002287 | 1.97 |
| ILMN_1673899 | FAM57A   | 0.37  | 7.71  | 4.40  | 2.77E-05 | 0.0002292 | 1.96 |
| ILMN_1815874 | NANS     | -0.37 | 8.98  | -4.40 | 2.78E-05 | 0.00023   | 1.95 |
| ILMN_2075643 | ANKRD29  | 0.20  | 6.78  | 4.40  | 2.78E-05 | 0.00023   | 1.95 |
| ILMN_1693766 | CEP135   | 0.20  | 7.41  | 4.40  | 2.78E-05 | 0.0002301 | 1.95 |
| ILMN_1770035 | NCOA5    | -0.22 | 7.70  | -4.39 | 2.81E-05 | 0.0002325 | 1.94 |
| ILMN_3282245 | NA       | 0.15  | 6.66  | 4.39  | 2.82E-05 | 0.0002329 | 1.94 |
| ILMN_1670970 | PPP3CA   | 0.18  | 7.27  | 4.39  | 2.82E-05 | 0.0002332 | 1.94 |

|              |          |       |       |       |          |           |      |
|--------------|----------|-------|-------|-------|----------|-----------|------|
| ILMN_3294322 | NA       | 0.15  | 6.68  | 4.39  | 2.83E-05 | 0.0002335 | 1.94 |
| ILMN_1700507 | CLASP1   | 0.16  | 7.64  | 4.39  | 2.84E-05 | 0.0002341 | 1.94 |
| ILMN_2354391 | NA       | -0.20 | 10.23 | -4.39 | 2.84E-05 | 0.0002347 | 1.93 |
| ILMN_1719664 | PTPN21   | -0.13 | 6.76  | -4.39 | 2.85E-05 | 0.0002348 | 1.93 |
| ILMN_1790315 | CFAP69   | 0.17  | 7.01  | 4.39  | 2.85E-05 | 0.0002352 | 1.93 |
| ILMN_1804530 | ARPC1B   | 0.28  | 8.00  | 4.39  | 2.85E-05 | 0.0002355 | 1.93 |
| ILMN_1732809 | ALG9     | 0.14  | 8.08  | 4.39  | 2.86E-05 | 0.0002358 | 1.93 |
| ILMN_2088124 | TMEM154  | 0.40  | 7.55  | 4.39  | 2.86E-05 | 0.0002361 | 1.93 |
| ILMN_2228780 | SLC5A11  | -0.14 | 6.52  | -4.39 | 2.86E-05 | 0.0002361 | 1.93 |
| ILMN_2180606 | NAA50    | 0.22  | 7.08  | 4.39  | 2.87E-05 | 0.0002362 | 1.93 |
| ILMN_1655165 | RNF138   | -0.24 | 7.30  | -4.39 | 2.87E-05 | 0.0002363 | 1.92 |
| ILMN_1755215 | SAMD5    | 0.23  | 7.10  | 4.39  | 2.87E-05 | 0.0002364 | 1.93 |
| ILMN_1753005 | RELN     | 0.11  | 6.42  | 4.39  | 2.88E-05 | 0.0002375 | 1.92 |
| ILMN_1690690 | SEC23IP  | 0.17  | 7.72  | 4.39  | 2.89E-05 | 0.0002375 | 1.92 |
| ILMN_1718646 | MMP15    | -0.25 | 7.30  | -4.39 | 2.91E-05 | 0.0002394 | 1.91 |
| ILMN_1724490 | PSPC1    | 0.13  | 6.85  | 4.39  | 2.91E-05 | 0.0002397 | 1.91 |
| ILMN_1764754 | RAMP1    | 0.25  | 6.57  | 4.39  | 2.92E-05 | 0.00024   | 1.91 |
| ILMN_1658290 | METTL22  | 0.13  | 7.08  | 4.39  | 2.93E-05 | 0.0002411 | 1.91 |
| ILMN_1814120 | PECR     | -0.18 | 7.04  | -4.38 | 2.93E-05 | 0.0002411 | 1.90 |
| ILMN_1722276 | PAFAH1B1 | -0.21 | 9.62  | -4.38 | 2.94E-05 | 0.0002417 | 1.90 |
| ILMN_1798543 | STK17B   | 0.35  | 7.56  | 4.38  | 2.95E-05 | 0.0002421 | 1.90 |
| ILMN_1790160 | KIT      | 0.45  | 8.08  | 4.38  | 2.95E-05 | 0.0002423 | 1.90 |
| ILMN_3299520 | PRKCB    | 0.46  | 7.36  | 4.38  | 2.95E-05 | 0.0002427 | 1.90 |
| ILMN_2227573 | GSTO1    | 0.21  | 10.59 | 4.38  | 2.96E-05 | 0.0002432 | 1.89 |
| ILMN_1724493 | LYSMD2   | 0.34  | 8.40  | 4.38  | 2.99E-05 | 0.0002454 | 1.89 |
| ILMN_1718565 | CDKN1C   | 0.15  | 6.66  | 4.38  | 2.99E-05 | 0.0002456 | 1.89 |
| ILMN_2089167 | RHOD     | 0.23  | 6.98  | 4.38  | 2.99E-05 | 0.0002456 | 1.88 |
| ILMN_3231609 | MUC12    | -0.37 | 7.27  | -4.38 | 2.99E-05 | 0.0002456 | 1.89 |
| ILMN_1729563 | UGDH     | -0.45 | 9.77  | -4.38 | 3.00E-05 | 0.0002457 | 1.88 |
| ILMN_1803476 | KCTD20   | 0.22  | 7.88  | 4.38  | 3.00E-05 | 0.000246  | 1.88 |
| ILMN_1808501 | SH3KBP1  | -0.29 | 9.69  | -4.38 | 3.00E-05 | 0.0002462 | 1.88 |
| ILMN_1757467 | H1FO     | -0.34 | 10.54 | -4.38 | 3.01E-05 | 0.0002465 | 1.88 |
| ILMN_2413808 | CD53     | 0.44  | 7.54  | 4.38  | 3.01E-05 | 0.0002465 | 1.88 |
| ILMN_1707137 | C17orf97 | -0.47 | 7.76  | -4.38 | 3.01E-05 | 0.0002467 | 1.88 |
| ILMN_1729973 | ZC3HAV1  | 0.17  | 6.92  | 4.38  | 3.01E-05 | 0.0002467 | 1.88 |
| ILMN_3243831 | CAPN6    | 0.15  | 6.75  | 4.38  | 3.01E-05 | 0.0002467 | 1.88 |
| ILMN_1761147 | GABPB1   | 0.21  | 7.07  | 4.38  | 3.02E-05 | 0.0002469 | 1.88 |
| ILMN_1654398 | RGL1     | 0.34  | 8.91  | 4.38  | 3.02E-05 | 0.0002475 | 1.87 |
| ILMN_2174394 | MMS19    | -0.15 | 8.83  | -4.38 | 3.03E-05 | 0.0002478 | 1.87 |
| ILMN_1725276 | FDCSP    | 0.90  | 7.27  | 4.37  | 3.04E-05 | 0.0002484 | 1.87 |
| ILMN_1696450 | KLK1     | -0.34 | 7.63  | -4.37 | 3.04E-05 | 0.0002484 | 1.87 |
| ILMN_1690179 | CRYM     | -0.17 | 6.77  | -4.37 | 3.04E-05 | 0.0002487 | 1.87 |
| ILMN_1705753 | CMSS1    | 0.18  | 7.11  | 4.37  | 3.05E-05 | 0.0002495 | 1.87 |
| ILMN_1756541 | MXD4     | -0.28 | 9.21  | -4.38 | 3.05E-05 | 0.0002495 | 1.87 |
| ILMN_1808657 | FMO3     | 0.16  | 6.53  | 4.37  | 3.05E-05 | 0.0002496 | 1.87 |
| ILMN_1774617 | NAB1     | 0.27  | 8.54  | 4.37  | 3.06E-05 | 0.00025   | 1.86 |
| ILMN_1687538 | ETS1     | 0.50  | 9.93  | 4.37  | 3.07E-05 | 0.0002503 | 1.86 |
| ILMN_3238955 | SNORD10  | 0.11  | 6.55  | 4.37  | 3.07E-05 | 0.0002506 | 1.87 |



|              |          |       |       |       |          |           |      |
|--------------|----------|-------|-------|-------|----------|-----------|------|
| ILMN_1755115 | RPL23    | 0.32  | 10.75 | 4.37  | 3.07E-05 | 0.0002507 | 1.86 |
| ILMN_2054213 | MPHOSPH8 | -0.20 | 7.92  | -4.37 | 3.07E-05 | 0.0002507 | 1.86 |
| ILMN_1775522 | MAGED1   | 0.19  | 10.33 | 4.38  | 3.08E-05 | 0.000251  | 1.87 |
| ILMN_1746158 | HOXD11   | -0.57 | 6.99  | -4.37 | 3.09E-05 | 0.000252  | 1.85 |
| ILMN_1672545 | GIPC2    | -0.16 | 6.93  | -4.37 | 3.10E-05 | 0.0002529 | 1.85 |
| ILMN_2361427 | NA       | -0.21 | 6.83  | -4.37 | 3.11E-05 | 0.0002532 | 1.85 |
| ILMN_1739283 | UPF2     | -0.17 | 8.79  | -4.37 | 3.11E-05 | 0.0002532 | 1.85 |
| ILMN_1856634 | NFIA     | 0.23  | 7.75  | 4.37  | 3.11E-05 | 0.0002537 | 1.85 |
| ILMN_2110252 | NPM3     | 0.21  | 7.92  | 4.37  | 3.12E-05 | 0.0002544 | 1.84 |
| ILMN_1761309 | ADCK5    | -0.18 | 7.08  | -4.37 | 3.12E-05 | 0.0002544 | 1.84 |
| ILMN_1699574 | NRP1     | 0.34  | 7.79  | 4.37  | 3.13E-05 | 0.0002547 | 1.84 |
| ILMN_1719543 | MAF      | 0.30  | 7.47  | 4.37  | 3.13E-05 | 0.0002552 | 1.84 |
| ILMN_1807596 | UBAP1    | 0.19  | 8.06  | 4.37  | 3.15E-05 | 0.0002562 | 1.84 |
| ILMN_2407389 | GPNMB    | 0.64  | 8.02  | 4.37  | 3.15E-05 | 0.0002562 | 1.84 |
| ILMN_1721922 | NAB2     | 0.17  | 6.91  | 4.37  | 3.15E-05 | 0.0002562 | 1.84 |
| ILMN_2231021 | TMEM185B | 0.17  | 7.02  | 4.36  | 3.16E-05 | 0.0002573 | 1.83 |
| ILMN_1698766 | PYCARD   | -0.30 | 9.44  | -4.36 | 3.17E-05 | 0.0002582 | 1.83 |
| ILMN_2162799 | AHR      | 0.19  | 6.96  | 4.36  | 3.18E-05 | 0.0002582 | 1.83 |
| ILMN_1703946 | ADORA2B  | 0.44  | 7.88  | 4.36  | 3.18E-05 | 0.0002586 | 1.83 |
| ILMN_1720311 | SLC25A46 | 0.22  | 8.62  | 4.36  | 3.18E-05 | 0.0002586 | 1.83 |
| ILMN_1741133 | NME1     | 0.33  | 10.21 | 4.36  | 3.20E-05 | 0.0002598 | 1.82 |
| ILMN_1787718 | SLC27A1  | 0.13  | 6.92  | 4.36  | 3.20E-05 | 0.0002598 | 1.82 |
| ILMN_2103362 | ARHGAP27 | -0.19 | 7.33  | -4.36 | 3.21E-05 | 0.0002608 | 1.82 |
| ILMN_1718619 | TRIM11   | -0.17 | 7.62  | -4.36 | 3.22E-05 | 0.0002611 | 1.82 |
| ILMN_1735743 | FBLN7    | 0.13  | 6.63  | 4.36  | 3.23E-05 | 0.0002622 | 1.81 |
| ILMN_2324162 | SLC45A1  | 0.14  | 6.62  | 4.36  | 3.23E-05 | 0.0002622 | 1.82 |
| ILMN_1668469 | KIAA0922 | 0.35  | 7.28  | 4.36  | 3.24E-05 | 0.0002626 | 1.81 |
| ILMN_1669206 | CNOT1    | -0.15 | 10.10 | -4.36 | 3.24E-05 | 0.0002626 | 1.81 |
| ILMN_1753885 | YTHDF1   | 0.13  | 8.85  | 4.36  | 3.24E-05 | 0.0002626 | 1.81 |
| ILMN_1777998 | ARHGAP25 | 0.41  | 7.45  | 4.36  | 3.24E-05 | 0.0002626 | 1.81 |
| ILMN_1788223 | RSPH3    | -0.18 | 7.35  | -4.36 | 3.24E-05 | 0.0002626 | 1.81 |
| ILMN_1666109 | MB       | -0.48 | 7.33  | -4.36 | 3.24E-05 | 0.0002627 | 1.81 |
| ILMN_2232121 | GPR65    | 0.22  | 6.86  | 4.36  | 3.24E-05 | 0.0002627 | 1.81 |
| ILMN_1786893 | RBM5     | -0.19 | 10.08 | -4.36 | 3.25E-05 | 0.000263  | 1.81 |
| ILMN_1685112 | TACO1    | -0.24 | 7.95  | -4.36 | 3.25E-05 | 0.0002631 | 1.81 |
| ILMN_3238740 | CENPBD1  | -0.13 | 6.78  | -4.36 | 3.26E-05 | 0.0002639 | 1.80 |
| ILMN_1666096 | ACSL3    | -0.19 | 7.56  | -4.36 | 3.27E-05 | 0.0002649 | 1.80 |
| ILMN_1723467 | ITGB1    | 0.21  | 11.59 | 4.35  | 3.28E-05 | 0.0002653 | 1.80 |
| ILMN_3237679 | PTAR1    | -0.21 | 8.59  | -4.35 | 3.29E-05 | 0.0002665 | 1.79 |
| ILMN_1715718 | ZNF784   | -0.18 | 6.91  | -4.35 | 3.30E-05 | 0.0002666 | 1.79 |
| ILMN_3249184 | RIMKLA   | -0.15 | 6.48  | -4.35 | 3.30E-05 | 0.0002666 | 1.79 |
| ILMN_2061185 | SH2B1    | -0.23 | 7.34  | -4.35 | 3.30E-05 | 0.0002671 | 1.79 |
| ILMN_1710482 | APLP2    | -0.21 | 8.73  | -4.35 | 3.31E-05 | 0.0002672 | 1.79 |
| ILMN_1791873 | COG1     | -0.13 | 7.08  | -4.35 | 3.33E-05 | 0.0002689 | 1.78 |
| ILMN_1751079 | TAP1     | 0.34  | 10.13 | 4.35  | 3.33E-05 | 0.000269  | 1.79 |
| ILMN_1725471 | GK       | 0.25  | 7.28  | 4.35  | 3.35E-05 | 0.0002705 | 1.78 |
| ILMN_1685540 | SHROOM3  | -0.33 | 10.21 | -4.35 | 3.35E-05 | 0.0002708 | 1.78 |
| ILMN_1733811 | JUP      | -0.32 | 10.01 | -4.35 | 3.36E-05 | 0.0002716 | 1.77 |

|              |         |       |       |       |          |           |      |
|--------------|---------|-------|-------|-------|----------|-----------|------|
| ILMN_2406501 | SOD2    | 0.41  | 7.22  | 4.35  | 3.36E-05 | 0.0002716 | 1.77 |
| ILMN_2085441 | FOXD4L1 | 0.11  | 6.44  | 4.35  | 3.37E-05 | 0.0002721 | 1.78 |
| ILMN_2255310 | RPS15A  | 0.38  | 9.46  | 4.35  | 3.37E-05 | 0.0002721 | 1.77 |
| ILMN_1740233 | UGT1A10 | -0.47 | 7.72  | -4.35 | 3.37E-05 | 0.0002721 | 1.77 |
| ILMN_2150019 | SUCLA2  | -0.24 | 8.44  | -4.35 | 3.38E-05 | 0.0002726 | 1.77 |
| ILMN_2326997 | DHPS    | -0.15 | 9.03  | -4.35 | 3.38E-05 | 0.0002726 | 1.77 |
| ILMN_1749244 | LYRM1   | 0.19  | 8.89  | 4.35  | 3.40E-05 | 0.0002741 | 1.76 |
| ILMN_1808041 | RPL10A  | 0.32  | 10.52 | 4.35  | 3.41E-05 | 0.0002748 | 1.77 |
| ILMN_2049021 | PTTG3P  | 0.32  | 7.75  | 4.34  | 3.42E-05 | 0.0002753 | 1.76 |
| ILMN_1747192 | RNF125  | -0.22 | 6.84  | -4.34 | 3.43E-05 | 0.0002759 | 1.76 |
| ILMN_2050255 | UCKL1   | -0.19 | 8.92  | -4.35 | 3.43E-05 | 0.0002763 | 1.76 |
| ILMN_1806787 | CSDC2   | 0.16  | 6.51  | 4.34  | 3.43E-05 | 0.0002765 | 1.76 |
| ILMN_1751803 | LSM10   | 0.23  | 7.64  | 4.34  | 3.44E-05 | 0.0002771 | 1.75 |
| ILMN_1721669 | IDH3B   | -0.25 | 9.75  | -4.34 | 3.46E-05 | 0.0002785 | 1.75 |
| ILMN_1654109 | EGFLAM  | 0.24  | 7.24  | 4.34  | 3.46E-05 | 0.0002788 | 1.75 |
| ILMN_1764414 | SOS2    | -0.13 | 6.89  | -4.34 | 3.48E-05 | 0.0002799 | 1.74 |
| ILMN_3227529 | RPS13   | 0.27  | 8.94  | 4.34  | 3.48E-05 | 0.0002802 | 1.74 |
| ILMN_1742147 | UBL4A   | -0.18 | 7.56  | -4.34 | 3.49E-05 | 0.0002803 | 1.74 |
| ILMN_1774074 | RXRB    | -0.16 | 8.56  | -4.34 | 3.50E-05 | 0.0002809 | 1.74 |
| ILMN_1655195 | NA      | -0.23 | 7.81  | -4.34 | 3.50E-05 | 0.0002815 | 1.73 |
| ILMN_2391345 | RPP25L  | -0.12 | 6.78  | -4.34 | 3.50E-05 | 0.0002815 | 1.73 |
| ILMN_1719641 | SMOC2   | 0.27  | 7.29  | 4.34  | 3.53E-05 | 0.0002832 | 1.73 |
| ILMN_2370208 | CMTM3   | 0.17  | 6.68  | 4.34  | 3.53E-05 | 0.0002832 | 1.73 |
| ILMN_1800412 | BMP1    | -0.23 | 7.69  | -4.34 | 3.53E-05 | 0.0002836 | 1.73 |
| ILMN_1743303 | TTC1    | -0.18 | 7.61  | -4.33 | 3.55E-05 | 0.0002853 | 1.72 |
| ILMN_1734486 | TSEN15  | 0.19  | 7.66  | 4.33  | 3.56E-05 | 0.0002853 | 1.72 |
| ILMN_2196097 | PPP2CA  | 0.17  | 9.14  | 4.33  | 3.57E-05 | 0.0002863 | 1.72 |
| ILMN_1705861 | AP1M2   | -0.20 | 7.41  | -4.33 | 3.59E-05 | 0.0002876 | 1.71 |
| ILMN_1673892 | GK5     | -0.19 | 7.27  | -4.33 | 3.61E-05 | 0.0002893 | 1.71 |
| ILMN_1715555 | DBP     | -0.13 | 6.65  | -4.33 | 3.61E-05 | 0.0002893 | 1.71 |
| ILMN_1671482 | GALM    | -0.33 | 8.30  | -4.33 | 3.61E-05 | 0.0002894 | 1.71 |
| ILMN_1772123 | ACACA   | -0.20 | 7.88  | -4.33 | 3.62E-05 | 0.0002902 | 1.70 |
| ILMN_1776522 | SLC50A1 | -0.30 | 8.44  | -4.33 | 3.63E-05 | 0.0002909 | 1.70 |
| ILMN_1791093 | PPHLN1  | 0.17  | 8.49  | 4.33  | 3.65E-05 | 0.0002922 | 1.70 |
| ILMN_2151075 | ZNF821  | -0.14 | 6.89  | -4.33 | 3.65E-05 | 0.0002922 | 1.70 |
| ILMN_1743711 | XPOT    | 0.26  | 8.00  | 4.33  | 3.65E-05 | 0.0002923 | 1.70 |
| ILMN_1723158 | NOP2    | 0.32  | 8.72  | 4.32  | 3.68E-05 | 0.0002943 | 1.69 |
| ILMN_1773073 | PHYH    | -0.41 | 9.47  | -4.32 | 3.68E-05 | 0.0002943 | 1.69 |
| ILMN_2214678 | MXD1    | -0.37 | 9.89  | -4.32 | 3.69E-05 | 0.0002951 | 1.69 |
| ILMN_1797895 | FFAR2   | 0.16  | 6.44  | 4.32  | 3.70E-05 | 0.0002963 | 1.68 |
| ILMN_2369785 | SNRPD2  | 0.18  | 11.78 | 4.32  | 3.71E-05 | 0.000297  | 1.68 |
| ILMN_1755822 | SYDE1   | 0.16  | 6.90  | 4.32  | 3.72E-05 | 0.0002971 | 1.68 |
| ILMN_1666156 | MORF4L2 | 0.28  | 9.39  | 4.32  | 3.74E-05 | 0.0002988 | 1.67 |
| ILMN_1898691 | NA      | 0.16  | 6.61  | 4.32  | 3.74E-05 | 0.0002991 | 1.67 |
| ILMN_1695422 | NCL     | 0.24  | 7.92  | 4.32  | 3.75E-05 | 0.0002994 | 1.67 |
| ILMN_1677955 | ENTPD6  | -0.14 | 6.76  | -4.32 | 3.77E-05 | 0.0003008 | 1.67 |
| ILMN_1724544 | PPP4R1  | 0.19  | 9.26  | 4.32  | 3.78E-05 | 0.0003021 | 1.66 |
| ILMN_1726189 | MS4A14  | 0.18  | 6.57  | 4.32  | 3.78E-05 | 0.0003021 | 1.66 |

|              |            |       |       |       |          |           |      |
|--------------|------------|-------|-------|-------|----------|-----------|------|
| ILMN_2348905 | CTLA4      | 0.19  | 6.61  | 4.32  | 3.79E-05 | 0.0003028 | 1.66 |
| ILMN_2395728 | HNRNPUL1   | 0.20  | 8.48  | 4.32  | 3.79E-05 | 0.0003028 | 1.66 |
| ILMN_1725912 | KLK12      | 0.36  | 6.88  | 4.32  | 3.80E-05 | 0.0003029 | 1.66 |
| ILMN_1701293 | COX7A2     | -0.17 | 12.26 | -4.32 | 3.81E-05 | 0.0003035 | 1.66 |
| ILMN_2253732 | ST8SIA4    | 0.23  | 6.99  | 4.31  | 3.82E-05 | 0.0003046 | 1.65 |
| ILMN_3268403 | ZNF667-AS1 | 0.17  | 6.85  | 4.31  | 3.82E-05 | 0.0003047 | 1.65 |
| ILMN_1790797 | VPS28      | -0.20 | 8.98  | -4.31 | 3.83E-05 | 0.000305  | 1.65 |
| ILMN_2191331 | RPS4Y2     | 0.35  | 7.01  | 4.31  | 3.84E-05 | 0.000306  | 1.65 |
| ILMN_2149935 | CC2D1B     | -0.21 | 7.31  | -4.31 | 3.84E-05 | 0.0003062 | 1.65 |
| ILMN_2177965 | RPS19BP1   | -0.19 | 7.69  | -4.31 | 3.84E-05 | 0.0003062 | 1.65 |
| ILMN_1670377 | NA         | -0.14 | 7.29  | -4.31 | 3.85E-05 | 0.0003065 | 1.65 |
| ILMN_1791826 | RAB25      | -0.33 | 9.67  | -4.31 | 3.86E-05 | 0.0003074 | 1.64 |
| ILMN_1678268 | VPS8       | -0.16 | 7.85  | -4.31 | 3.87E-05 | 0.0003081 | 1.64 |
| ILMN_1737344 | DDX41      | -0.14 | 7.40  | -4.31 | 3.87E-05 | 0.0003081 | 1.65 |
| ILMN_1674386 | PITX1      | 0.44  | 9.40  | 4.31  | 3.88E-05 | 0.0003085 | 1.64 |
| ILMN_3294642 | FLNC       | 0.15  | 6.56  | 4.31  | 3.88E-05 | 0.0003086 | 1.64 |
| ILMN_1778985 | PRMT9      | 0.13  | 7.05  | 4.31  | 3.88E-05 | 0.0003089 | 1.64 |
| ILMN_1667043 | EIF4A3     | 0.16  | 9.93  | 4.31  | 3.89E-05 | 0.0003095 | 1.63 |
| ILMN_1755942 | FFAR4      | -0.37 | 7.49  | -4.31 | 3.90E-05 | 0.0003099 | 1.63 |
| ILMN_1754912 | GLE1       | -0.18 | 9.42  | -4.31 | 3.92E-05 | 0.0003118 | 1.63 |
| ILMN_1902929 | NA         | -0.16 | 6.83  | -4.31 | 3.93E-05 | 0.0003122 | 1.63 |
| ILMN_1676003 | PNOC       | 0.18  | 6.64  | 4.31  | 3.93E-05 | 0.0003124 | 1.62 |
| ILMN_1698144 | CFH        | 0.13  | 6.45  | 4.31  | 3.94E-05 | 0.0003133 | 1.62 |
| ILMN_1743427 | SCYL3      | -0.18 | 7.72  | -4.31 | 3.95E-05 | 0.0003139 | 1.62 |
| ILMN_1801105 | PRKCD      | -0.24 | 9.44  | -4.31 | 3.95E-05 | 0.0003139 | 1.62 |
| ILMN_2193817 | CLEC4G     | 0.11  | 6.51  | 4.31  | 3.96E-05 | 0.0003142 | 1.62 |
| ILMN_1694778 | KRT18      | -0.46 | 11.80 | -4.30 | 3.97E-05 | 0.000315  | 1.62 |
| ILMN_1773561 | RAP2C      | 0.20  | 7.99  | 4.31  | 3.98E-05 | 0.0003158 | 1.62 |
| ILMN_1773063 | OSBPL1A    | -0.23 | 7.34  | -4.30 | 4.00E-05 | 0.0003172 | 1.61 |
| ILMN_1690077 | PPM1A      | -0.16 | 7.03  | -4.30 | 4.01E-05 | 0.0003178 | 1.61 |
| ILMN_1654488 | KDM6A      | -0.27 | 7.63  | -4.30 | 4.01E-05 | 0.0003182 | 1.61 |
| ILMN_2208802 | NA         | -0.24 | 8.41  | -4.30 | 4.01E-05 | 0.0003182 | 1.61 |
| ILMN_1709032 | FYCO1      | 0.20  | 8.30  | 4.30  | 4.03E-05 | 0.000319  | 1.60 |
| ILMN_3181411 | ATL1       | -0.16 | 6.79  | -4.30 | 4.04E-05 | 0.0003198 | 1.60 |
| ILMN_2174574 | HNRNPA3P1  | 0.12  | 6.80  | 4.30  | 4.06E-05 | 0.0003212 | 1.60 |
| ILMN_1761159 | ESYT1      | 0.20  | 9.09  | 4.30  | 4.06E-05 | 0.0003216 | 1.59 |
| ILMN_1682139 | RAI14      | 0.31  | 8.48  | 4.30  | 4.08E-05 | 0.0003228 | 1.59 |
| ILMN_1735075 | PGBD2      | -0.17 | 7.19  | -4.30 | 4.09E-05 | 0.000324  | 1.59 |
| ILMN_2153787 | ARRDC5     | 0.16  | 6.61  | 4.30  | 4.10E-05 | 0.0003241 | 1.59 |
| ILMN_1749115 | RTN2       | 0.10  | 6.59  | 4.30  | 4.11E-05 | 0.0003255 | 1.58 |
| ILMN_1766435 | WBP11      | 0.15  | 8.97  | 4.30  | 4.11E-05 | 0.0003255 | 1.58 |
| ILMN_1681008 | CGRRF1     | -0.15 | 7.80  | -4.29 | 4.13E-05 | 0.0003267 | 1.58 |
| ILMN_1717180 | MTMR6      | 0.18  | 7.32  | 4.29  | 4.13E-05 | 0.0003268 | 1.58 |
| ILMN_1766560 | ANKHD1-EIF | -0.16 | 6.94  | -4.29 | 4.14E-05 | 0.0003269 | 1.58 |
| ILMN_1656042 | KIAA0319L  | -0.15 | 6.97  | -4.29 | 4.14E-05 | 0.0003275 | 1.57 |
| ILMN_1675331 | PEG3       | 0.20  | 6.83  | 4.29  | 4.15E-05 | 0.0003276 | 1.57 |
| ILMN_1732612 | SHB        | 0.19  | 7.18  | 4.29  | 4.17E-05 | 0.0003294 | 1.57 |
| ILMN_2320480 | NA         | 0.14  | 6.89  | 4.29  | 4.18E-05 | 0.0003298 | 1.57 |

|              |          |       |       |       |          |           |      |
|--------------|----------|-------|-------|-------|----------|-----------|------|
| ILMN_2372974 | SIRPA    | 0.16  | 6.80  | 4.29  | 4.19E-05 | 0.0003304 | 1.57 |
| ILMN_3243238 | TPSB2    | 0.65  | 8.31  | 4.29  | 4.19E-05 | 0.0003308 | 1.56 |
| ILMN_1778650 | VILL     | -0.30 | 7.70  | -4.29 | 4.20E-05 | 0.0003314 | 1.56 |
| ILMN_1664348 | PNPLA4   | -0.13 | 6.54  | -4.29 | 4.20E-05 | 0.0003315 | 1.56 |
| ILMN_1809590 | GINS2    | -0.31 | 7.18  | -4.29 | 4.20E-05 | 0.0003315 | 1.57 |
| ILMN_3245792 | NA       | -0.16 | 6.70  | -4.29 | 4.20E-05 | 0.0003316 | 1.56 |
| ILMN_1763745 | CCNJL    | -0.16 | 6.69  | -4.29 | 4.21E-05 | 0.0003318 | 1.56 |
| ILMN_1810474 | UBE2I    | 0.18  | 9.81  | 4.29  | 4.21E-05 | 0.0003318 | 1.56 |
| ILMN_2315789 | PTPRD    | -0.31 | 8.00  | -4.29 | 4.21E-05 | 0.0003319 | 1.56 |
| ILMN_1656718 | DEF8     | 0.16  | 6.75  | 4.29  | 4.23E-05 | 0.0003331 | 1.56 |
| ILMN_3223126 | TYMP     | 0.19  | 6.77  | 4.29  | 4.25E-05 | 0.0003351 | 1.55 |
| ILMN_3251672 | DSG2     | -0.28 | 11.47 | -4.29 | 4.26E-05 | 0.0003354 | 1.55 |
| ILMN_1726786 | TNRC6B   | -0.22 | 9.37  | -4.29 | 4.27E-05 | 0.0003361 | 1.55 |
| ILMN_2064725 | METTL7B  | -0.32 | 7.60  | -4.29 | 4.27E-05 | 0.0003362 | 1.55 |
| ILMN_2400583 | USP9X    | -0.16 | 7.09  | -4.29 | 4.28E-05 | 0.0003366 | 1.55 |
| ILMN_2160819 | RPS27    | 0.18  | 13.45 | 4.29  | 4.29E-05 | 0.0003371 | 1.55 |
| ILMN_2362457 | ZDHHC16  | -0.14 | 7.37  | -4.28 | 4.29E-05 | 0.0003375 | 1.54 |
| ILMN_1701455 | FBXO6    | 0.19  | 7.06  | 4.29  | 4.30E-05 | 0.000338  | 1.55 |
| ILMN_1802631 | AGA      | 0.18  | 7.49  | 4.28  | 4.30E-05 | 0.000338  | 1.54 |
| ILMN_1749006 | RCSD1    | 0.22  | 7.05  | 4.28  | 4.31E-05 | 0.0003384 | 1.54 |
| ILMN_1758679 | TMEM168  | -0.22 | 7.64  | -4.28 | 4.32E-05 | 0.0003392 | 1.54 |
| ILMN_1773154 | NFKBIA   | 0.30  | 11.02 | 4.28  | 4.32E-05 | 0.0003392 | 1.54 |
| ILMN_2131523 | SACS     | 0.17  | 6.67  | 4.28  | 4.35E-05 | 0.0003417 | 1.53 |
| ILMN_2383913 | WDR33    | 0.17  | 7.14  | 4.28  | 4.36E-05 | 0.0003421 | 1.53 |
| ILMN_1666976 | PLD3     | 0.28  | 8.56  | 4.28  | 4.36E-05 | 0.0003425 | 1.53 |
| ILMN_2408796 | MFSD12   | 0.11  | 6.44  | 4.28  | 4.38E-05 | 0.0003435 | 1.53 |
| ILMN_1709334 | TM9SF1   | -0.14 | 7.98  | -4.28 | 4.38E-05 | 0.0003436 | 1.52 |
| ILMN_2123431 | RPS6KC1  | 0.15  | 6.94  | 4.28  | 4.40E-05 | 0.0003449 | 1.52 |
| ILMN_1725620 | GGNBP2   | -0.14 | 9.08  | -4.28 | 4.41E-05 | 0.0003459 | 1.52 |
| ILMN_2169839 | CNBP     | 0.29  | 9.24  | 4.28  | 4.42E-05 | 0.0003464 | 1.51 |
| ILMN_1792409 | AMOT     | -0.32 | 7.79  | -4.28 | 4.42E-05 | 0.0003464 | 1.51 |
| ILMN_1763347 | PIK3CB   | -0.20 | 7.57  | -4.28 | 4.42E-05 | 0.0003466 | 1.51 |
| ILMN_1682694 | VMA21    | 0.16  | 8.83  | 4.28  | 4.42E-05 | 0.0003466 | 1.51 |
| ILMN_1705107 | NA       | -0.45 | 10.03 | -4.28 | 4.43E-05 | 0.0003467 | 1.52 |
| ILMN_1763365 | FAM103A1 | -0.13 | 7.17  | -4.28 | 4.43E-05 | 0.0003467 | 1.51 |
| ILMN_1673548 | LGALS1   | 0.25  | 7.27  | 4.27  | 4.46E-05 | 0.0003496 | 1.50 |
| ILMN_1692665 | UNC5B    | -0.15 | 6.74  | -4.27 | 4.47E-05 | 0.0003497 | 1.50 |
| ILMN_1722648 | SF3B4    | -0.21 | 9.71  | -4.27 | 4.47E-05 | 0.00035   | 1.50 |
| ILMN_3249667 | HLA-DQA2 | 0.80  | 9.68  | 4.27  | 4.49E-05 | 0.000351  | 1.50 |
| ILMN_2154053 | KDSR     | 0.22  | 8.60  | 4.27  | 4.51E-05 | 0.0003527 | 1.50 |
| ILMN_1724250 | GRN      | -0.26 | 9.31  | -4.27 | 4.53E-05 | 0.0003544 | 1.49 |
| ILMN_1755234 | SSH3     | -0.26 | 8.02  | -4.27 | 4.56E-05 | 0.0003563 | 1.49 |
| ILMN_1700563 | ZNF552   | -0.12 | 6.52  | -4.27 | 4.56E-05 | 0.0003568 | 1.48 |
| ILMN_1682399 | CLOCK    | -0.29 | 7.09  | -4.27 | 4.58E-05 | 0.0003582 | 1.48 |
| ILMN_1746396 | CTNNB1   | 0.28  | 8.83  | 4.27  | 4.60E-05 | 0.0003591 | 1.48 |
| ILMN_1776678 | GIMAP7   | 0.40  | 8.55  | 4.27  | 4.60E-05 | 0.0003591 | 1.48 |
| ILMN_1660794 | LBH      | 0.16  | 6.64  | 4.27  | 4.60E-05 | 0.0003596 | 1.47 |
| ILMN_1771051 | RPL29    | 0.21  | 7.18  | 4.27  | 4.61E-05 | 0.0003599 | 1.47 |

|              |           |       |       |       |          |           |      |
|--------------|-----------|-------|-------|-------|----------|-----------|------|
| ILMN_1813491 | SPTLC1    | -0.16 | 9.66  | -4.26 | 4.62E-05 | 0.0003606 | 1.47 |
| ILMN_1787657 | CLDN12    | 0.30  | 9.30  | 4.26  | 4.63E-05 | 0.0003611 | 1.47 |
| ILMN_1684114 | TPI1P2    | -0.19 | 8.38  | -4.26 | 4.63E-05 | 0.0003612 | 1.47 |
| ILMN_1760708 | NA        | -0.17 | 6.59  | -4.26 | 4.64E-05 | 0.0003624 | 1.47 |
| ILMN_2316540 | MRPL11    | -0.21 | 8.61  | -4.26 | 4.65E-05 | 0.0003625 | 1.47 |
| ILMN_1661196 | CSF2RA    | 0.22  | 6.86  | 4.26  | 4.66E-05 | 0.0003633 | 1.46 |
| ILMN_1808769 | LINC00467 | 0.32  | 7.52  | 4.26  | 4.66E-05 | 0.0003633 | 1.46 |
| ILMN_1810962 | PTPRK     | -0.17 | 9.25  | -4.26 | 4.67E-05 | 0.000364  | 1.46 |
| ILMN_1653161 | SNCG      | 0.11  | 6.34  | 4.26  | 4.68E-05 | 0.0003647 | 1.46 |
| ILMN_2124951 | RBMX      | 0.21  | 8.31  | 4.26  | 4.68E-05 | 0.0003647 | 1.46 |
| ILMN_1681678 | CTDSP1    | -0.13 | 6.86  | -4.26 | 4.68E-05 | 0.0003648 | 1.46 |
| ILMN_1659659 | MAGEH1    | 0.19  | 7.16  | 4.26  | 4.69E-05 | 0.0003654 | 1.46 |
| ILMN_1713993 | UBAC2     | -0.14 | 8.40  | -4.26 | 4.69E-05 | 0.0003654 | 1.46 |
| ILMN_1726565 | PIK3R2    | -0.27 | 9.32  | -4.26 | 4.70E-05 | 0.0003663 | 1.45 |
| ILMN_1682095 | RCOR3     | -0.18 | 8.72  | -4.26 | 4.71E-05 | 0.0003665 | 1.45 |
| ILMN_1777499 | AK4       | -0.17 | 6.87  | -4.26 | 4.71E-05 | 0.0003668 | 1.45 |
| ILMN_2399016 | MMP28     | -0.33 | 8.17  | -4.26 | 4.74E-05 | 0.0003686 | 1.45 |
| ILMN_2415157 | ARID5A    | 0.12  | 6.48  | 4.26  | 4.75E-05 | 0.0003699 | 1.44 |
| ILMN_1799765 | NA        | -0.15 | 6.88  | -4.26 | 4.76E-05 | 0.0003699 | 1.44 |
| ILMN_2221014 | BAG4      | 0.13  | 6.61  | 4.26  | 4.77E-05 | 0.0003712 | 1.44 |
| ILMN_1706531 | ABCC5     | 0.26  | 7.92  | 4.25  | 4.79E-05 | 0.0003724 | 1.44 |
| ILMN_1665559 | CDK2      | 0.21  | 7.89  | 4.25  | 4.80E-05 | 0.0003729 | 1.44 |
| ILMN_1656082 | NA        | -0.15 | 12.97 | -4.25 | 4.80E-05 | 0.0003729 | 1.44 |
| ILMN_3245116 | GOLIM4    | -0.21 | 7.29  | -4.25 | 4.81E-05 | 0.0003734 | 1.43 |
| ILMN_1802642 | TOM1L1    | -0.19 | 7.12  | -4.25 | 4.81E-05 | 0.0003735 | 1.43 |
| ILMN_1775703 | TRAPPC6A  | -0.22 | 7.71  | -4.25 | 4.82E-05 | 0.0003745 | 1.43 |
| ILMN_1792744 | SLC13A2   | -0.11 | 6.53  | -4.25 | 4.83E-05 | 0.0003746 | 1.43 |
| ILMN_1728024 | NA        | 0.14  | 7.02  | 4.25  | 4.83E-05 | 0.0003749 | 1.43 |
| ILMN_1770673 | AKNA      | 0.30  | 7.92  | 4.25  | 4.83E-05 | 0.0003749 | 1.43 |
| ILMN_1745811 | TDRD3     | -0.13 | 6.91  | -4.25 | 4.89E-05 | 0.0003791 | 1.42 |
| ILMN_1768469 | TCN1      | 0.53  | 6.66  | 4.25  | 4.89E-05 | 0.0003794 | 1.42 |
| ILMN_1695880 | LOX       | 0.14  | 6.60  | 4.25  | 4.90E-05 | 0.0003798 | 1.42 |
| ILMN_3234993 | ROMO1     | -0.18 | 10.76 | -4.25 | 4.90E-05 | 0.0003801 | 1.42 |
| ILMN_1690911 | C16orf87  | 0.16  | 7.10  | 4.25  | 4.92E-05 | 0.0003813 | 1.41 |
| ILMN_1777982 | USF1      | -0.25 | 7.96  | -4.25 | 4.93E-05 | 0.0003824 | 1.41 |
| ILMN_3188076 | RPS7      | 0.32  | 8.73  | 4.25  | 4.95E-05 | 0.0003832 | 1.41 |
| ILMN_1807201 | FAM104A   | 0.16  | 8.56  | 4.25  | 4.96E-05 | 0.000384  | 1.40 |
| ILMN_1814966 | PIAS3     | 0.11  | 6.83  | 4.25  | 4.97E-05 | 0.0003849 | 1.40 |
| ILMN_1760493 | LIMS2     | 0.20  | 6.85  | 4.24  | 4.98E-05 | 0.0003853 | 1.40 |
| ILMN_1784523 | ATP6V1G1  | 0.16  | 10.36 | 4.24  | 4.98E-05 | 0.0003854 | 1.40 |
| ILMN_2367671 | LIMK2     | -0.13 | 6.67  | -4.25 | 4.99E-05 | 0.0003858 | 1.40 |
| ILMN_1791388 | ZNF787    | -0.20 | 8.03  | -4.24 | 4.99E-05 | 0.000386  | 1.40 |
| ILMN_1741021 | CH25H     | 0.38  | 7.27  | 4.25  | 5.00E-05 | 0.0003871 | 1.40 |
| ILMN_2042595 | PCM1      | 0.16  | 9.43  | 4.24  | 5.02E-05 | 0.0003884 | 1.39 |
| ILMN_3244070 | ABCC6P2   | -0.13 | 6.76  | -4.24 | 5.03E-05 | 0.0003891 | 1.39 |
| ILMN_1716089 | KANK2     | 0.25  | 7.21  | 4.24  | 5.05E-05 | 0.0003904 | 1.39 |
| ILMN_2231242 | HMGB1     | 0.19  | 7.71  | 4.24  | 5.05E-05 | 0.0003904 | 1.39 |
| ILMN_2403851 | GGA1      | -0.12 | 6.66  | -4.24 | 5.05E-05 | 0.0003904 | 1.39 |

|              |            |       |       |       |          |           |      |
|--------------|------------|-------|-------|-------|----------|-----------|------|
| ILMN_1737164 | TM9SF1     | -0.15 | 7.36  | -4.24 | 5.05E-05 | 0.0003905 | 1.39 |
| ILMN_2075189 | SLC35F2    | -0.24 | 8.75  | -4.24 | 5.13E-05 | 0.0003961 | 1.37 |
| ILMN_1745447 | HIVEP2     | 0.15  | 6.97  | 4.24  | 5.14E-05 | 0.0003965 | 1.37 |
| ILMN_1756417 | ANKRD37    | -0.34 | 7.57  | -4.24 | 5.16E-05 | 0.0003982 | 1.37 |
| ILMN_1704253 | C6orf106   | 0.16  | 7.20  | 4.23  | 5.17E-05 | 0.0003987 | 1.37 |
| ILMN_2112301 | DRAP1      | 0.22  | 8.90  | 4.23  | 5.17E-05 | 0.0003987 | 1.37 |
| ILMN_1770515 | UBE2V2     | 0.15  | 8.71  | 4.23  | 5.17E-05 | 0.0003989 | 1.36 |
| ILMN_1684158 | GPT2       | 0.28  | 7.78  | 4.24  | 5.19E-05 | 0.0003999 | 1.37 |
| ILMN_1761946 | PROM2      | -0.45 | 8.54  | -4.23 | 5.19E-05 | 0.0004002 | 1.36 |
| ILMN_1749662 | GPX1       | 0.26  | 9.78  | 4.23  | 5.19E-05 | 0.0004003 | 1.36 |
| ILMN_2191313 | FAM21A     | -0.12 | 6.59  | -4.23 | 5.20E-05 | 0.0004006 | 1.36 |
| ILMN_1899960 | NA         | -0.17 | 6.97  | -4.23 | 5.23E-05 | 0.0004032 | 1.35 |
| ILMN_1684391 | PLOD1      | 0.19  | 9.11  | 4.23  | 5.27E-05 | 0.0004062 | 1.35 |
| ILMN_1670821 | TXLNGY     | 0.63  | 7.35  | 4.23  | 5.29E-05 | 0.0004075 | 1.34 |
| ILMN_1773650 | LRRN3      | -0.19 | 6.75  | -4.23 | 5.30E-05 | 0.0004079 | 1.35 |
| ILMN_2311166 | ITGB5      | 0.20  | 9.04  | 4.23  | 5.30E-05 | 0.0004081 | 1.34 |
| ILMN_1708709 | KIAA1211   | -0.32 | 8.03  | -4.23 | 5.31E-05 | 0.0004088 | 1.34 |
| ILMN_1662026 | BTK        | 0.34  | 7.29  | 4.23  | 5.32E-05 | 0.0004091 | 1.34 |
| ILMN_2076640 | KHDRBS1    | 0.15  | 10.89 | 4.23  | 5.32E-05 | 0.0004091 | 1.34 |
| ILMN_1752952 | MMP28      | -0.23 | 7.24  | -4.23 | 5.34E-05 | 0.0004106 | 1.34 |
| ILMN_2095759 | OGFRL1     | 0.12  | 6.51  | 4.23  | 5.34E-05 | 0.0004106 | 1.33 |
| ILMN_1689318 | NUAK1      | 0.24  | 7.85  | 4.23  | 5.34E-05 | 0.0004109 | 1.33 |
| ILMN_2393450 | INF2       | -0.27 | 10.51 | -4.23 | 5.36E-05 | 0.0004117 | 1.33 |
| ILMN_3264073 | RPS27      | 0.34  | 8.75  | 4.22  | 5.37E-05 | 0.0004125 | 1.33 |
| ILMN_2348487 | ADGRE3     | 0.13  | 6.36  | 4.22  | 5.38E-05 | 0.000413  | 1.33 |
| ILMN_1717207 | MMP25      | 0.25  | 7.09  | 4.22  | 5.39E-05 | 0.0004144 | 1.32 |
| ILMN_1689831 | EPB41L4A-A | -0.12 | 6.62  | -4.22 | 5.41E-05 | 0.0004155 | 1.32 |
| ILMN_1738718 | CYB561D2   | -0.20 | 7.83  | -4.22 | 5.44E-05 | 0.0004173 | 1.32 |
| ILMN_1790249 | F8A1       | -0.15 | 7.19  | -4.22 | 5.44E-05 | 0.0004176 | 1.32 |
| ILMN_1651767 | MKL1       | 0.15  | 6.75  | 4.22  | 5.44E-05 | 0.0004177 | 1.32 |
| ILMN_1722771 | LDHD       | -0.15 | 6.59  | -4.22 | 5.44E-05 | 0.0004177 | 1.32 |
| ILMN_1749829 | DLGAP5     | 0.26  | 7.08  | 4.22  | 5.44E-05 | 0.0004177 | 1.32 |
| ILMN_3202734 | NA         | 0.22  | 12.00 | 4.22  | 5.46E-05 | 0.0004187 | 1.31 |
| ILMN_1664776 | EFR3A      | 0.27  | 9.28  | 4.22  | 5.47E-05 | 0.0004192 | 1.32 |
| ILMN_3215156 | LINC00543  | -0.14 | 6.69  | -4.22 | 5.48E-05 | 0.0004202 | 1.31 |
| ILMN_3238554 | SNORA80A   | 0.22  | 6.98  | 4.22  | 5.50E-05 | 0.0004212 | 1.31 |
| ILMN_1654112 | PARD6A     | 0.16  | 6.77  | 4.22  | 5.51E-05 | 0.0004225 | 1.30 |
| ILMN_2408572 | RNASE4     | -0.35 | 8.59  | -4.22 | 5.52E-05 | 0.0004225 | 1.30 |
| ILMN_1776649 | LRRK2      | 0.15  | 6.62  | 4.22  | 5.53E-05 | 0.0004239 | 1.30 |
| ILMN_1682312 | CYBB       | 0.31  | 7.42  | 4.22  | 5.54E-05 | 0.000424  | 1.30 |
| ILMN_2305544 | DBI        | -0.27 | 11.52 | -4.22 | 5.54E-05 | 0.000424  | 1.30 |
| ILMN_1749629 | CUL1       | 0.15  | 8.25  | 4.22  | 5.56E-05 | 0.0004257 | 1.30 |
| ILMN_1811328 | DPP7       | 0.17  | 6.96  | 4.21  | 5.58E-05 | 0.0004266 | 1.29 |
| ILMN_2331636 | ACACA      | -0.20 | 8.24  | -4.21 | 5.57E-05 | 0.0004266 | 1.29 |
| ILMN_1735552 | KIF1B      | -0.17 | 9.46  | -4.21 | 5.58E-05 | 0.0004267 | 1.29 |
| ILMN_1750658 | HAX1       | -0.18 | 8.32  | -4.21 | 5.58E-05 | 0.0004269 | 1.29 |
| ILMN_1703036 | WRNIP1     | -0.13 | 6.93  | -4.21 | 5.59E-05 | 0.0004277 | 1.29 |
| ILMN_1700428 | HLA-DOB    | 0.41  | 7.17  | 4.21  | 5.60E-05 | 0.0004278 | 1.29 |

|              |          |       |       |       |          |           |      |
|--------------|----------|-------|-------|-------|----------|-----------|------|
| ILMN_1711766 | SKP1     | -0.14 | 9.43  | -4.21 | 5.60E-05 | 0.0004279 | 1.29 |
| ILMN_2310909 | ATP2A3   | -0.23 | 8.15  | -4.21 | 5.60E-05 | 0.0004279 | 1.29 |
| ILMN_1651642 | GPC2     | -0.14 | 6.74  | -4.21 | 5.60E-05 | 0.000428  | 1.29 |
| ILMN_1786759 | TMEM258  | 0.17  | 11.54 | 4.21  | 5.62E-05 | 0.0004294 | 1.29 |
| ILMN_2189933 | RPL36AL  | 0.16  | 11.65 | 4.21  | 5.62E-05 | 0.0004294 | 1.28 |
| ILMN_1730391 | MRPS18A  | -0.19 | 7.89  | -4.21 | 5.64E-05 | 0.0004302 | 1.28 |
| ILMN_1703263 | SP140    | 0.19  | 6.51  | 4.21  | 5.67E-05 | 0.0004324 | 1.28 |
| ILMN_1713380 | EIF2B2   | 0.15  | 8.30  | 4.21  | 5.67E-05 | 0.0004324 | 1.28 |
| ILMN_2384188 | NFATC1   | 0.15  | 6.51  | 4.21  | 5.67E-05 | 0.0004326 | 1.28 |
| ILMN_3188984 | ZFAS1    | 0.28  | 9.80  | 4.21  | 5.67E-05 | 0.0004326 | 1.28 |
| ILMN_1675085 | UBA6     | 0.28  | 8.20  | 4.21  | 5.70E-05 | 0.0004346 | 1.27 |
| ILMN_1724293 | KDEL2    | 0.25  | 9.14  | 4.21  | 5.70E-05 | 0.0004346 | 1.27 |
| ILMN_2252309 | DPP7     | 0.25  | 7.88  | 4.21  | 5.71E-05 | 0.000435  | 1.28 |
| ILMN_3219340 | RPL29    | 0.31  | 11.61 | 4.21  | 5.72E-05 | 0.000436  | 1.27 |
| ILMN_2203891 | SMAD7    | -0.18 | 7.40  | -4.21 | 5.73E-05 | 0.0004362 | 1.27 |
| ILMN_1703593 | BAIAP2L1 | 0.36  | 8.91  | 4.21  | 5.73E-05 | 0.0004368 | 1.27 |
| ILMN_1718537 | HPS6     | -0.20 | 8.64  | -4.21 | 5.74E-05 | 0.000437  | 1.27 |
| ILMN_1685052 | DNAH1    | -0.16 | 7.38  | -4.21 | 5.75E-05 | 0.0004376 | 1.26 |
| ILMN_1676256 | NA       | 0.75  | 8.95  | 4.21  | 5.76E-05 | 0.0004381 | 1.26 |
| ILMN_1740900 | BMP4     | -0.43 | 8.68  | -4.20 | 5.78E-05 | 0.0004401 | 1.26 |
| ILMN_1675387 | LIMS1    | 0.19  | 7.26  | 4.20  | 5.79E-05 | 0.0004407 | 1.26 |
| ILMN_1728230 | ZNF30    | -0.13 | 6.99  | -4.20 | 5.80E-05 | 0.0004413 | 1.26 |
| ILMN_1784709 | GNPDA1   | 0.24  | 8.96  | 4.20  | 5.81E-05 | 0.0004417 | 1.25 |
| ILMN_1799600 | STARD8   | 0.15  | 6.74  | 4.21  | 5.82E-05 | 0.0004423 | 1.26 |
| ILMN_1751143 | TMEM243  | 0.31  | 8.48  | 4.20  | 5.83E-05 | 0.0004432 | 1.25 |
| ILMN_2057573 | ESYT2    | 0.17  | 10.52 | 4.20  | 5.84E-05 | 0.000444  | 1.25 |
| ILMN_1772991 | NA       | 0.11  | 6.89  | 4.20  | 5.85E-05 | 0.0004444 | 1.25 |
| ILMN_2306189 | MAGED1   | 0.17  | 8.31  | 4.20  | 5.87E-05 | 0.0004462 | 1.24 |
| ILMN_1746492 | IFT27    | -0.15 | 7.37  | -4.20 | 5.88E-05 | 0.0004463 | 1.24 |
| ILMN_2309848 | FXVD5    | 0.46  | 9.15  | 4.20  | 5.90E-05 | 0.0004477 | 1.24 |
| ILMN_2227968 | NTHL1    | -0.25 | 7.64  | -4.20 | 5.90E-05 | 0.0004478 | 1.24 |
| ILMN_2069128 | EPB41L2  | 0.17  | 6.72  | 4.20  | 5.90E-05 | 0.0004481 | 1.24 |
| ILMN_2364272 | MBNL2    | 0.24  | 8.71  | 4.20  | 5.95E-05 | 0.0004519 | 1.23 |
| ILMN_1773992 | ACKR4    | 0.15  | 6.52  | 4.20  | 5.98E-05 | 0.0004536 | 1.23 |
| ILMN_1810684 | TINAG    | -0.32 | 7.35  | -4.20 | 5.98E-05 | 0.000454  | 1.23 |
| ILMN_1801934 | SERTAD3  | 0.17  | 7.65  | 4.20  | 5.99E-05 | 0.000454  | 1.23 |
| ILMN_2204726 | UBR5     | 0.18  | 8.04  | 4.20  | 5.99E-05 | 0.0004542 | 1.23 |
| ILMN_1783712 | KNOP1    | -0.14 | 6.84  | -4.19 | 6.00E-05 | 0.0004549 | 1.22 |
| ILMN_1882112 | NA       | 0.14  | 6.63  | 4.19  | 6.00E-05 | 0.0004549 | 1.22 |
| ILMN_1800331 | PTCH1    | -0.23 | 6.88  | -4.19 | 6.01E-05 | 0.000455  | 1.22 |
| ILMN_2056551 | RBMX2    | 0.13  | 7.29  | 4.19  | 6.04E-05 | 0.0004573 | 1.22 |
| ILMN_1745599 | NA       | 0.12  | 6.60  | 4.19  | 6.04E-05 | 0.0004578 | 1.22 |
| ILMN_2413572 | MARK2    | -0.24 | 7.54  | -4.19 | 6.05E-05 | 0.0004584 | 1.21 |
| ILMN_2052717 | GRAMD1C  | -0.14 | 6.60  | -4.19 | 6.07E-05 | 0.0004596 | 1.21 |
| ILMN_1713841 | NA       | -0.14 | 6.60  | -4.19 | 6.08E-05 | 0.0004602 | 1.21 |
| ILMN_2324202 | GABRE    | 0.22  | 6.96  | 4.19  | 6.10E-05 | 0.0004613 | 1.21 |
| ILMN_1682857 | NDUFAF2  | 0.24  | 8.43  | 4.19  | 6.11E-05 | 0.0004623 | 1.21 |
| ILMN_1750496 | ZBTB16   | 0.13  | 6.54  | 4.19  | 6.11E-05 | 0.0004623 | 1.21 |

|              |          |       |       |       |          |           |      |
|--------------|----------|-------|-------|-------|----------|-----------|------|
| ILMN_1791575 | HNRNPLL  | 0.19  | 7.41  | 4.19  | 6.12E-05 | 0.0004627 | 1.20 |
| ILMN_2163873 | FNDC1    | 0.31  | 6.87  | 4.19  | 6.12E-05 | 0.000463  | 1.20 |
| ILMN_1777061 | ZSWIM6   | -0.21 | 8.85  | -4.19 | 6.14E-05 | 0.0004642 | 1.20 |
| ILMN_1730660 | LGALS3   | -0.33 | 8.18  | -4.19 | 6.14E-05 | 0.0004644 | 1.20 |
| ILMN_2123871 | TMEM18   | -0.14 | 6.87  | -4.19 | 6.15E-05 | 0.000465  | 1.20 |
| ILMN_1733863 | UBALD1   | 0.13  | 6.86  | 4.19  | 6.16E-05 | 0.0004654 | 1.20 |
| ILMN_1664994 | MINPP1   | -0.20 | 7.19  | -4.19 | 6.21E-05 | 0.0004692 | 1.19 |
| ILMN_1779486 | FAM126B  | -0.22 | 8.12  | -4.18 | 6.23E-05 | 0.0004706 | 1.19 |
| ILMN_2052208 | GADD45A  | 0.24  | 7.90  | 4.18  | 6.25E-05 | 0.0004718 | 1.18 |
| ILMN_1811616 | EEPD1    | 0.12  | 6.70  | 4.18  | 6.26E-05 | 0.0004728 | 1.18 |
| ILMN_1766762 | DYNLRB1  | -0.15 | 8.27  | -4.18 | 6.29E-05 | 0.0004743 | 1.18 |
| ILMN_1674344 | PARD6G   | 0.12  | 6.53  | 4.18  | 6.30E-05 | 0.0004751 | 1.18 |
| ILMN_2363426 | MAX      | -0.17 | 7.20  | -4.18 | 6.31E-05 | 0.0004757 | 1.18 |
| ILMN_1652918 | RHOF     | 0.17  | 6.88  | 4.18  | 6.33E-05 | 0.000477  | 1.17 |
| ILMN_1713058 | PSTPIP2  | 0.17  | 6.82  | 4.18  | 6.33E-05 | 0.0004775 | 1.17 |
| ILMN_1669377 | AP4B1    | -0.21 | 8.83  | -4.18 | 6.35E-05 | 0.0004786 | 1.17 |
| ILMN_1778836 | SRSF7    | -0.23 | 9.07  | -4.18 | 6.36E-05 | 0.0004791 | 1.17 |
| ILMN_1699651 | IL6      | 0.59  | 6.87  | 4.18  | 6.36E-05 | 0.0004793 | 1.17 |
| ILMN_1801845 | DNAL4    | -0.24 | 8.31  | -4.18 | 6.37E-05 | 0.0004794 | 1.17 |
| ILMN_1696704 | TLE4     | 0.15  | 6.77  | 4.18  | 6.37E-05 | 0.0004796 | 1.17 |
| ILMN_1788931 | DOCK8    | 0.38  | 7.67  | 4.18  | 6.37E-05 | 0.0004796 | 1.17 |
| ILMN_1808537 | LRRC66   | -0.28 | 7.14  | -4.18 | 6.37E-05 | 0.0004799 | 1.17 |
| ILMN_1701711 | BRD8     | -0.18 | 7.84  | -4.18 | 6.39E-05 | 0.000481  | 1.16 |
| ILMN_2148527 | H19      | 0.27  | 6.56  | 4.18  | 6.40E-05 | 0.0004816 | 1.16 |
| ILMN_1671087 | C6orf222 | -0.21 | 6.80  | -4.18 | 6.42E-05 | 0.0004831 | 1.16 |
| ILMN_1659058 | PPP1R10  | 0.17  | 7.86  | 4.18  | 6.42E-05 | 0.0004832 | 1.16 |
| ILMN_2209515 | SNORD56  | 0.15  | 6.67  | 4.18  | 6.43E-05 | 0.0004836 | 1.16 |
| ILMN_1666665 | COL23A1  | 0.14  | 6.68  | 4.18  | 6.44E-05 | 0.000484  | 1.16 |
| ILMN_1720799 | TECR     | -0.22 | 9.74  | -4.18 | 6.44E-05 | 0.0004844 | 1.16 |
| ILMN_1778755 | TRIL     | -0.21 | 6.83  | -4.18 | 6.45E-05 | 0.0004846 | 1.16 |
| ILMN_1653125 | PER1     | 0.15  | 6.49  | 4.18  | 6.46E-05 | 0.0004852 | 1.15 |
| ILMN_3243859 | NDUFB9   | -0.29 | 9.34  | -4.17 | 6.49E-05 | 0.0004876 | 1.15 |
| ILMN_2207504 | LEP      | 0.19  | 6.58  | 4.17  | 6.53E-05 | 0.0004902 | 1.14 |
| ILMN_1804148 | TMED4    | -0.24 | 8.98  | -4.17 | 6.55E-05 | 0.0004917 | 1.14 |
| ILMN_1665235 | CRTAP    | 0.29  | 7.57  | 4.17  | 6.56E-05 | 0.0004921 | 1.14 |
| ILMN_2407811 | NEURL4   | -0.12 | 6.83  | -4.17 | 6.56E-05 | 0.0004924 | 1.14 |
| ILMN_1685641 | BCHE     | 0.22  | 6.70  | 4.17  | 6.59E-05 | 0.0004946 | 1.13 |
| ILMN_2134855 | PIN4     | -0.14 | 6.84  | -4.17 | 6.61E-05 | 0.0004956 | 1.13 |
| ILMN_1696521 | EGFR     | -0.11 | 6.74  | -4.17 | 6.63E-05 | 0.0004974 | 1.13 |
| ILMN_2214197 | TP53INP1 | 0.44  | 8.32  | 4.17  | 6.65E-05 | 0.0004987 | 1.13 |
| ILMN_2376050 | FXYD3    | -0.57 | 7.73  | -4.17 | 6.65E-05 | 0.0004987 | 1.13 |
| ILMN_1815366 | ENGASE   | -0.22 | 7.28  | -4.17 | 6.66E-05 | 0.0004995 | 1.12 |
| ILMN_3245403 | NA       | 0.14  | 13.07 | 4.17  | 6.67E-05 | 0.0004998 | 1.12 |
| ILMN_1791593 | DENND5B  | -0.19 | 7.38  | -4.17 | 6.69E-05 | 0.0005013 | 1.12 |
| ILMN_2406654 | ABCC6    | -0.13 | 6.72  | -4.16 | 6.72E-05 | 0.000503  | 1.12 |
| ILMN_1731609 | CHMP6    | -0.16 | 7.33  | -4.17 | 6.72E-05 | 0.0005032 | 1.12 |
| ILMN_3238560 | IFI27L2  | 0.30  | 8.08  | 4.16  | 6.76E-05 | 0.0005058 | 1.11 |
| ILMN_2344283 | FMO3     | 0.14  | 6.42  | 4.16  | 6.79E-05 | 0.000508  | 1.11 |



|              |            |       |       |       |          |           |      |
|--------------|------------|-------|-------|-------|----------|-----------|------|
| ILMN_2098947 | NA         | -0.18 | 6.95  | -4.16 | 6.80E-05 | 0.0005086 | 1.11 |
| ILMN_2115005 | FGD2       | 0.40  | 8.62  | 4.16  | 6.81E-05 | 0.0005095 | 1.11 |
| ILMN_1730645 | TMEFF2     | 0.28  | 6.50  | 4.16  | 6.83E-05 | 0.0005108 | 1.10 |
| ILMN_1801941 | C1orf50    | -0.14 | 7.98  | -4.16 | 6.83E-05 | 0.000511  | 1.10 |
| ILMN_1651692 | STK10      | 0.16  | 6.91  | 4.16  | 6.84E-05 | 0.0005114 | 1.10 |
| ILMN_1762091 | CATSPERB   | 0.21  | 6.70  | 4.16  | 6.84E-05 | 0.0005114 | 1.10 |
| ILMN_1728677 | CREB5      | 0.14  | 6.43  | 4.16  | 6.88E-05 | 0.0005138 | 1.09 |
| ILMN_1743911 | SLC25A39   | -0.20 | 9.87  | -4.16 | 6.92E-05 | 0.0005169 | 1.09 |
| ILMN_2209766 | RHBDD1     | 0.14  | 7.15  | 4.16  | 6.93E-05 | 0.0005174 | 1.09 |
| ILMN_2063925 | CTNBL1     | 0.17  | 7.97  | 4.16  | 6.98E-05 | 0.0005211 | 1.09 |
| ILMN_1721022 | SHC1       | 0.18  | 10.12 | 4.16  | 6.98E-05 | 0.0005215 | 1.08 |
| ILMN_1727200 | SLCO4A1    | 0.18  | 6.94  | 4.15  | 7.04E-05 | 0.0005257 | 1.07 |
| ILMN_1683597 | RPL23A     | 0.18  | 12.62 | 4.15  | 7.05E-05 | 0.0005259 | 1.07 |
| ILMN_1705403 | CYP2S1     | -0.40 | 8.35  | -4.15 | 7.08E-05 | 0.0005282 | 1.07 |
| ILMN_2378376 | CYB561     | -0.21 | 8.19  | -4.15 | 7.09E-05 | 0.000529  | 1.06 |
| ILMN_1856480 | NA         | -0.28 | 8.32  | -4.15 | 7.09E-05 | 0.0005292 | 1.06 |
| ILMN_1726204 | SCRG1      | 0.23  | 6.51  | 4.15  | 7.13E-05 | 0.0005321 | 1.06 |
| ILMN_1769412 | RAPGEF1    | 0.26  | 8.80  | 4.15  | 7.18E-05 | 0.000535  | 1.05 |
| ILMN_1679555 | TIMM23     | 0.17  | 10.46 | 4.15  | 7.18E-05 | 0.0005353 | 1.05 |
| ILMN_3238417 | RPS4Y1     | 1.06  | 8.10  | 4.15  | 7.22E-05 | 0.0005377 | 1.05 |
| ILMN_2391551 | PROSER1    | -0.21 | 8.60  | -4.14 | 7.24E-05 | 0.0005394 | 1.05 |
| ILMN_1766797 | CCS        | -0.14 | 7.31  | -4.14 | 7.27E-05 | 0.0005418 | 1.04 |
| ILMN_1806908 | PRKCB      | 0.59  | 8.17  | 4.14  | 7.27E-05 | 0.0005418 | 1.04 |
| ILMN_3307940 | DLGAP1-AS1 | 0.12  | 6.79  | 4.14  | 7.30E-05 | 0.0005434 | 1.04 |
| ILMN_1772743 | PIGK       | 0.15  | 7.74  | 4.14  | 7.30E-05 | 0.0005435 | 1.04 |
| ILMN_1783142 | RPS4Y1     | 1.65  | 9.25  | 4.14  | 7.30E-05 | 0.0005435 | 1.04 |
| ILMN_1709814 | NMRAL1     | -0.21 | 8.39  | -4.14 | 7.31E-05 | 0.0005442 | 1.04 |
| ILMN_1658821 | SAMD1      | -0.14 | 6.87  | -4.14 | 7.33E-05 | 0.0005451 | 1.04 |
| ILMN_2307740 | CD46       | -0.21 | 9.94  | -4.14 | 7.33E-05 | 0.0005454 | 1.03 |
| ILMN_1662964 | PRMT3      | 0.19  | 8.16  | 4.14  | 7.34E-05 | 0.0005455 | 1.04 |
| ILMN_3235027 | TAF1D      | 0.12  | 6.73  | 4.14  | 7.34E-05 | 0.0005455 | 1.03 |
| ILMN_1659075 | HLA-DOA    | 0.41  | 7.59  | 4.14  | 7.35E-05 | 0.0005462 | 1.03 |
| ILMN_1759206 | PLS1       | -0.37 | 9.79  | -4.14 | 7.37E-05 | 0.0005477 | 1.03 |
| ILMN_1697701 | PLEKHJ1    | -0.23 | 7.10  | -4.14 | 7.38E-05 | 0.0005481 | 1.03 |
| ILMN_1725680 | LRRC1      | -0.21 | 7.33  | -4.14 | 7.41E-05 | 0.0005505 | 1.02 |
| ILMN_2079004 | MDH2       | -0.17 | 12.04 | -4.14 | 7.41E-05 | 0.0005505 | 1.03 |
| ILMN_1779163 | AAMDC      | -0.25 | 8.17  | -4.14 | 7.46E-05 | 0.0005543 | 1.02 |
| ILMN_1734483 | BSDC1      | -0.18 | 9.17  | -4.14 | 7.48E-05 | 0.0005557 | 1.01 |
| ILMN_1806561 | NR1I2      | -0.17 | 6.77  | -4.14 | 7.49E-05 | 0.0005561 | 1.01 |
| ILMN_1711314 | NUDT5      | 0.21  | 8.42  | 4.13  | 7.50E-05 | 0.0005567 | 1.01 |
| ILMN_2170814 | LAMP3      | 0.37  | 7.29  | 4.13  | 7.50E-05 | 0.0005568 | 1.01 |
| ILMN_1786720 | PROM1      | -0.47 | 10.54 | -4.13 | 7.51E-05 | 0.0005569 | 1.01 |
| ILMN_1696266 | XRCC3      | -0.13 | 6.86  | -4.13 | 7.52E-05 | 0.000558  | 1.01 |
| ILMN_1785266 | OFD1       | -0.16 | 7.57  | -4.13 | 7.55E-05 | 0.0005595 | 1.01 |
| ILMN_1716397 | LAYN       | 0.15  | 6.69  | 4.13  | 7.56E-05 | 0.0005601 | 1.00 |
| ILMN_1756669 | POGK       | 0.16  | 8.85  | 4.13  | 7.59E-05 | 0.0005625 | 1.00 |
| ILMN_3265365 | CEP78      | 0.14  | 7.06  | 4.13  | 7.59E-05 | 0.0005627 | 1.00 |
| ILMN_1809439 | HMGB1      | 0.27  | 8.30  | 4.13  | 7.64E-05 | 0.0005662 | 0.99 |

|              |            |       |       |       |          |           |      |
|--------------|------------|-------|-------|-------|----------|-----------|------|
| ILMN_1741350 | CEP70      | -0.23 | 7.30  | -4.13 | 7.66E-05 | 0.000567  | 0.99 |
| ILMN_3179620 | NA         | 0.15  | 6.80  | 4.13  | 7.66E-05 | 0.0005672 | 0.99 |
| ILMN_1653652 | PTPRC      | 0.22  | 6.66  | 4.13  | 7.67E-05 | 0.0005675 | 0.99 |
| ILMN_1761684 | WNK2       | -0.17 | 6.77  | -4.13 | 7.67E-05 | 0.0005675 | 0.99 |
| ILMN_2150402 | TMEM64     | 0.21  | 6.86  | 4.13  | 7.67E-05 | 0.0005677 | 1.00 |
| ILMN_1786197 | NR2F1      | 0.20  | 6.95  | 4.13  | 7.68E-05 | 0.0005684 | 0.99 |
| ILMN_3246634 | NA         | -0.22 | 8.08  | -4.13 | 7.70E-05 | 0.0005696 | 0.99 |
| ILMN_2135709 | ERICH5     | -0.12 | 6.45  | -4.13 | 7.71E-05 | 0.0005704 | 0.99 |
| ILMN_2176592 | BCHE       | 0.36  | 7.27  | 4.13  | 7.72E-05 | 0.0005707 | 0.98 |
| ILMN_1794157 | CATSPER2P1 | -0.13 | 6.83  | -4.13 | 7.73E-05 | 0.0005711 | 0.98 |
| ILMN_1719870 | FAM72D     | 0.10  | 6.42  | 4.13  | 7.75E-05 | 0.0005724 | 0.98 |
| ILMN_1808584 | COX20      | -0.19 | 8.20  | -4.13 | 7.75E-05 | 0.0005728 | 0.98 |
| ILMN_1706390 | UGT1A6     | 0.13  | 6.38  | 4.13  | 7.77E-05 | 0.0005742 | 0.98 |
| ILMN_1753196 | PTTG1      | 0.31  | 7.97  | 4.12  | 7.79E-05 | 0.0005754 | 0.98 |
| ILMN_1695386 | RAD51C     | 0.16  | 7.27  | 4.12  | 7.81E-05 | 0.0005764 | 0.97 |
| ILMN_1653708 | CORO1B     | -0.21 | 9.00  | -4.12 | 7.83E-05 | 0.0005783 | 0.97 |
| ILMN_1796835 | NA         | -0.14 | 6.94  | -4.12 | 7.85E-05 | 0.0005793 | 0.97 |
| ILMN_3233135 | SLF2       | -0.20 | 7.62  | -4.12 | 7.85E-05 | 0.0005793 | 0.97 |
| ILMN_1734445 | PKDCC      | -0.25 | 7.15  | -4.12 | 7.87E-05 | 0.0005806 | 0.97 |
| ILMN_1814077 | ZFPM2      | 0.14  | 6.54  | 4.12  | 7.87E-05 | 0.0005806 | 0.97 |
| ILMN_1679185 | LEF1       | 0.35  | 7.45  | 4.12  | 7.87E-05 | 0.0005806 | 0.97 |
| ILMN_1699015 | NA         | -0.17 | 12.50 | -4.12 | 7.94E-05 | 0.0005848 | 0.96 |
| ILMN_1761464 | CD74       | 0.48  | 7.88  | 4.12  | 7.93E-05 | 0.0005848 | 0.96 |
| ILMN_1778561 | WEE1       | 0.23  | 7.77  | 4.12  | 7.94E-05 | 0.0005848 | 0.96 |
| ILMN_1874673 | NA         | -0.11 | 6.58  | -4.12 | 7.94E-05 | 0.0005848 | 0.96 |
| ILMN_1728885 | KIAA1644   | 0.21  | 6.97  | 4.12  | 7.94E-05 | 0.000585  | 0.96 |
| ILMN_2075927 | STK40      | 0.21  | 9.19  | 4.12  | 7.98E-05 | 0.0005876 | 0.95 |
| ILMN_1761941 | FAM198B    | 0.29  | 7.92  | 4.12  | 8.00E-05 | 0.0005893 | 0.95 |
| ILMN_1685005 | TNFRSF1A   | 0.23  | 9.28  | 4.12  | 8.01E-05 | 0.0005897 | 0.95 |
| ILMN_1813938 | CHCHD4     | -0.21 | 8.47  | -4.12 | 8.03E-05 | 0.0005908 | 0.95 |
| ILMN_2364864 | MB         | -0.33 | 7.03  | -4.12 | 8.03E-05 | 0.0005908 | 0.95 |
| ILMN_1687864 | POP5       | -0.30 | 7.31  | -4.12 | 8.05E-05 | 0.0005926 | 0.95 |
| ILMN_1667857 | RITA1      | -0.17 | 7.37  | -4.12 | 8.06E-05 | 0.0005927 | 0.94 |
| ILMN_1749081 | AUTS2      | -0.27 | 9.36  | -4.12 | 8.06E-05 | 0.0005929 | 0.95 |
| ILMN_3244434 | ARAP2      | 0.22  | 7.09  | 4.12  | 8.07E-05 | 0.0005937 | 0.95 |
| ILMN_1651828 | CCT3       | 0.22  | 8.25  | 4.11  | 8.11E-05 | 0.0005962 | 0.94 |
| ILMN_2345015 | PTGES2     | -0.20 | 8.22  | -4.11 | 8.11E-05 | 0.0005962 | 0.94 |
| ILMN_1737965 | ELOVL4     | 0.16  | 6.82  | 4.11  | 8.15E-05 | 0.0005988 | 0.93 |
| ILMN_3273154 | LINC00261  | 0.35  | 7.37  | 4.11  | 8.17E-05 | 0.0006001 | 0.93 |
| ILMN_1712929 | DNAJB12    | -0.16 | 7.23  | -4.11 | 8.19E-05 | 0.0006013 | 0.93 |
| ILMN_1804277 | SPRED1     | 0.28  | 9.61  | 4.11  | 8.20E-05 | 0.0006021 | 0.93 |
| ILMN_1724609 | SLC2A8     | -0.31 | 7.87  | -4.11 | 8.22E-05 | 0.0006038 | 0.92 |
| ILMN_1739582 | NA         | -0.31 | 8.43  | -4.11 | 8.23E-05 | 0.0006041 | 0.92 |
| ILMN_1685580 | CBLB       | 0.24  | 8.47  | 4.11  | 8.26E-05 | 0.0006065 | 0.92 |
| ILMN_3237971 | SNORD11    | 0.12  | 6.75  | 4.11  | 8.29E-05 | 0.0006079 | 0.92 |
| ILMN_3214532 | RPL21P28   | 0.28  | 10.28 | 4.11  | 8.30E-05 | 0.0006085 | 0.92 |
| ILMN_2161556 | C12orf49   | -0.17 | 7.39  | -4.11 | 8.33E-05 | 0.0006108 | 0.91 |
| ILMN_1708537 | RBPJ       | 0.16  | 7.79  | 4.11  | 8.33E-05 | 0.0006108 | 0.91 |

|              |          |       |       |       |          |           |      |
|--------------|----------|-------|-------|-------|----------|-----------|------|
| ILMN_1714489 | CIB2     | -0.17 | 6.88  | -4.11 | 8.35E-05 | 0.0006121 | 0.91 |
| ILMN_1810275 | SLC7A7   | 0.37  | 8.17  | 4.11  | 8.35E-05 | 0.0006121 | 0.91 |
| ILMN_1766528 | SLC25A36 | -0.17 | 7.37  | -4.11 | 8.38E-05 | 0.0006137 | 0.91 |
| ILMN_1658684 | ATP9B    | 0.14  | 6.79  | 4.10  | 8.39E-05 | 0.0006149 | 0.91 |
| ILMN_1718968 | NA       | -0.20 | 6.70  | -4.10 | 8.40E-05 | 0.0006151 | 0.90 |
| ILMN_1715543 | ACOT1    | -0.18 | 7.06  | -4.10 | 8.40E-05 | 0.0006152 | 0.90 |
| ILMN_1680996 | ALOX5    | 0.44  | 8.60  | 4.10  | 8.41E-05 | 0.0006154 | 0.90 |
| ILMN_2191428 | UBB      | -0.15 | 12.82 | -4.10 | 8.41E-05 | 0.0006154 | 0.90 |
| ILMN_1696065 | SDF4     | -0.18 | 9.10  | -4.10 | 8.42E-05 | 0.0006159 | 0.90 |
| ILMN_1729051 | MSH6     | 0.21  | 9.06  | 4.10  | 8.44E-05 | 0.0006175 | 0.90 |
| ILMN_1700203 | CCDC183  | -0.14 | 6.58  | -4.10 | 8.47E-05 | 0.0006199 | 0.90 |
| ILMN_1691789 | SMNDC1   | 0.19  | 7.78  | 4.10  | 8.48E-05 | 0.0006202 | 0.90 |
| ILMN_1688526 | ARL5A    | 0.14  | 10.68 | 4.10  | 8.49E-05 | 0.0006211 | 0.89 |
| ILMN_1776313 | TMEM150B | -0.14 | 6.78  | -4.10 | 8.55E-05 | 0.0006253 | 0.89 |
| ILMN_1703720 | SF3B6    | 0.22  | 10.28 | 4.10  | 8.59E-05 | 0.0006277 | 0.89 |
| ILMN_1788180 | RAB13    | 0.19  | 7.45  | 4.10  | 8.60E-05 | 0.0006285 | 0.89 |
| ILMN_1790052 | NA       | 0.12  | 6.72  | 4.10  | 8.61E-05 | 0.0006289 | 0.88 |
| ILMN_2324056 | GNL3     | 0.26  | 8.58  | 4.10  | 8.61E-05 | 0.0006289 | 0.88 |
| ILMN_2405078 | OSBPL8   | 0.14  | 6.82  | 4.10  | 8.62E-05 | 0.0006298 | 0.88 |
| ILMN_1683120 | UNG      | -0.24 | 8.90  | -4.10 | 8.63E-05 | 0.0006302 | 0.88 |
| ILMN_1691535 | CUL4B    | 0.10  | 6.62  | 4.10  | 8.68E-05 | 0.0006337 | 0.87 |
| ILMN_1681462 | REG1B    | 0.85  | 7.13  | 4.09  | 8.71E-05 | 0.0006356 | 0.87 |
| ILMN_3289195 | NA       | -0.17 | 6.95  | -4.09 | 8.72E-05 | 0.0006366 | 0.87 |
| ILMN_1658016 | ZNF831   | 0.15  | 6.42  | 4.09  | 8.73E-05 | 0.000637  | 0.87 |
| ILMN_2160388 | RPL24    | 0.17  | 12.58 | 4.09  | 8.73E-05 | 0.000637  | 0.87 |
| ILMN_1761858 | MID1     | -0.21 | 8.29  | -4.09 | 8.76E-05 | 0.0006391 | 0.87 |
| ILMN_1676548 | BZW2     | -0.18 | 9.31  | -4.09 | 8.82E-05 | 0.0006426 | 0.86 |
| ILMN_1684553 | RHOH     | 0.17  | 6.60  | 4.09  | 8.82E-05 | 0.0006426 | 0.86 |
| ILMN_1793517 | RASAL1   | 0.15  | 6.82  | 4.09  | 8.85E-05 | 0.0006445 | 0.86 |
| ILMN_3230215 | TOX2     | 0.14  | 6.60  | 4.09  | 8.85E-05 | 0.0006445 | 0.86 |
| ILMN_1735192 | COLEC11  | 0.13  | 6.68  | 4.09  | 8.85E-05 | 0.0006445 | 0.86 |
| ILMN_1653026 | PLAC8    | -0.48 | 11.02 | -4.09 | 8.88E-05 | 0.0006468 | 0.85 |
| ILMN_2213558 | TMED10P1 | 0.20  | 10.67 | 4.09  | 8.89E-05 | 0.000647  | 0.85 |
| ILMN_2358626 | ADK      | 0.21  | 7.75  | 4.09  | 8.90E-05 | 0.0006482 | 0.85 |
| ILMN_3239060 | KRBA1    | 0.16  | 7.05  | 4.09  | 8.92E-05 | 0.0006492 | 0.85 |
| ILMN_1706094 | HECTD1   | 0.16  | 9.70  | 4.09  | 8.94E-05 | 0.0006507 | 0.85 |
| ILMN_1717434 | DFNB31   | 0.13  | 6.63  | 4.09  | 8.98E-05 | 0.0006529 | 0.84 |
| ILMN_1711910 | ENO4     | -0.13 | 6.61  | -4.09 | 8.99E-05 | 0.0006535 | 0.84 |
| ILMN_1785071 | SEPP1    | -0.39 | 11.77 | -4.09 | 8.99E-05 | 0.0006539 | 0.85 |
| ILMN_1755123 | NA       | -0.25 | 8.00  | -4.09 | 9.01E-05 | 0.0006552 | 0.84 |
| ILMN_1697189 | PNCK     | 0.34  | 6.85  | 4.08  | 9.04E-05 | 0.0006567 | 0.84 |
| ILMN_1798189 | COX7C    | -0.14 | 12.64 | -4.08 | 9.04E-05 | 0.0006567 | 0.84 |
| ILMN_1687247 | SPATA20  | -0.21 | 8.20  | -4.08 | 9.06E-05 | 0.000658  | 0.83 |
| ILMN_2090802 | TMEM79   | -0.21 | 7.11  | -4.08 | 9.07E-05 | 0.0006586 | 0.83 |
| ILMN_1870041 | NA       | 0.23  | 7.41  | 4.08  | 9.10E-05 | 0.000661  | 0.83 |
| ILMN_1732923 | SIPA1L2  | -0.24 | 8.66  | -4.08 | 9.12E-05 | 0.0006624 | 0.83 |
| ILMN_2224833 | ADIPOR2  | -0.20 | 9.18  | -4.08 | 9.14E-05 | 0.0006633 | 0.82 |
| ILMN_2244547 | ETNK1    | 0.14  | 6.51  | 4.08  | 9.14E-05 | 0.0006633 | 0.82 |

|              |          |       |       |       |           |           |      |
|--------------|----------|-------|-------|-------|-----------|-----------|------|
| ILMN_1654340 | NA       | -0.28 | 7.72  | -4.08 | 9.15E-05  | 0.0006642 | 0.82 |
| ILMN_1664855 | PPP1R14C | -0.39 | 7.28  | -4.08 | 9.16E-05  | 0.0006642 | 0.82 |
| ILMN_2312149 | NA       | -0.13 | 6.94  | -4.08 | 9.15E-05  | 0.0006642 | 0.82 |
| ILMN_1690894 | HSP90B3P | 0.19  | 7.00  | 4.08  | 9.18E-05  | 0.0006657 | 0.82 |
| ILMN_1680390 | GCNT2    | -0.24 | 7.22  | -4.08 | 9.20E-05  | 0.0006674 | 0.82 |
| ILMN_1778560 | ZNF3     | -0.13 | 6.82  | -4.08 | 9.26E-05  | 0.0006713 | 0.81 |
| ILMN_1741265 | CRYBA2   | -0.20 | 6.70  | -4.08 | 9.29E-05  | 0.0006733 | 0.81 |
| ILMN_2197381 | PCK1     | -0.31 | 7.03  | -4.08 | 9.31E-05  | 0.0006743 | 0.81 |
| ILMN_1655126 | PI4KAP1  | -0.27 | 8.46  | -4.08 | 9.32E-05  | 0.0006751 | 0.81 |
| ILMN_1733538 | RGS10    | 0.34  | 9.16  | 4.08  | 9.32E-05  | 0.0006751 | 0.81 |
| ILMN_1684964 | ZNF212   | -0.19 | 7.82  | -4.08 | 9.35E-05  | 0.0006768 | 0.80 |
| ILMN_1695107 | IL20RA   | -0.21 | 7.14  | -4.08 | 9.35E-05  | 0.0006768 | 0.80 |
| ILMN_1725700 | MOV10    | -0.19 | 7.44  | -4.08 | 9.35E-05  | 0.0006768 | 0.80 |
| ILMN_1674665 | CPNE2    | -0.12 | 6.60  | -4.07 | 9.36E-05  | 0.0006775 | 0.80 |
| ILMN_1808095 | RNF41    | 0.13  | 6.94  | 4.07  | 9.36E-05  | 0.0006775 | 0.80 |
| ILMN_1741143 | TXK      | 0.11  | 6.45  | 4.07  | 9.40E-05  | 0.0006797 | 0.80 |
| ILMN_1695423 | CD9      | -0.27 | 9.59  | -4.07 | 9.41E-05  | 0.0006803 | 0.80 |
| ILMN_1768127 | EBNA1BP2 | 0.18  | 9.46  | 4.07  | 9.42E-05  | 0.0006808 | 0.80 |
| ILMN_3225300 | DYNC1I2  | 0.20  | 8.62  | 4.07  | 9.45E-05  | 0.0006828 | 0.79 |
| ILMN_1786429 | LPAR6    | 0.25  | 7.74  | 4.07  | 9.49E-05  | 0.0006858 | 0.79 |
| ILMN_1813277 | SUPT3H   | 0.12  | 6.65  | 4.07  | 9.49E-05  | 0.0006861 | 0.79 |
| ILMN_1677505 | CCL21    | 0.63  | 8.05  | 4.07  | 9.50E-05  | 0.0006863 | 0.79 |
| ILMN_1714741 | NA       | -0.17 | 6.97  | -4.07 | 9.52E-05  | 0.0006875 | 0.79 |
| ILMN_1703692 | TUBB     | 0.27  | 8.81  | 4.07  | 9.52E-05  | 0.0006876 | 0.79 |
| ILMN_1807088 | TTC33    | 0.13  | 6.75  | 4.07  | 9.52E-05  | 0.0006876 | 0.79 |
| ILMN_3292082 | NA       | -0.14 | 7.26  | -4.07 | 9.54E-05  | 0.0006885 | 0.78 |
| ILMN_1724009 | SETD6    | -0.15 | 7.36  | -4.07 | 9.55E-05  | 0.0006893 | 0.78 |
| ILMN_1813685 | RAB29    | 0.16  | 6.78  | 4.07  | 9.60E-05  | 0.0006927 | 0.78 |
| ILMN_1779010 | MAP3K3   | 0.14  | 6.76  | 4.07  | 9.63E-05  | 0.0006944 | 0.78 |
| ILMN_2326282 | TMEM259  | -0.21 | 8.29  | -4.07 | 9.65E-05  | 0.0006957 | 0.77 |
| ILMN_1773413 | DOCK9    | 0.15  | 6.99  | 4.07  | 9.66E-05  | 0.0006968 | 0.77 |
| ILMN_1651415 | DERL3    | 0.17  | 6.82  | 4.07  | 9.68E-05  | 0.0006977 | 0.77 |
| ILMN_1804051 | SNX8     | 0.18  | 7.16  | 4.06  | 9.71E-05  | 0.0007    | 0.77 |
| ILMN_1759910 | SERPINA5 | 0.16  | 6.59  | 4.07  | 9.73E-05  | 0.000701  | 0.77 |
| ILMN_2405680 | CRB3     | -0.18 | 7.37  | -4.06 | 9.74E-05  | 0.0007015 | 0.76 |
| ILMN_2275502 | RAPH1    | 0.17  | 6.82  | 4.06  | 9.74E-05  | 0.0007016 | 0.76 |
| ILMN_1714393 | RAB24    | -0.14 | 6.91  | -4.06 | 9.76E-05  | 0.0007026 | 0.76 |
| ILMN_2415144 | SP110    | 0.26  | 8.11  | 4.06  | 9.77E-05  | 0.0007031 | 0.76 |
| ILMN_1701643 | GDPD5    | 0.13  | 6.57  | 4.06  | 9.79E-05  | 0.0007045 | 0.76 |
| ILMN_1661491 | SH3GL2   | -0.13 | 6.49  | -4.06 | 9.80E-05  | 0.0007055 | 0.76 |
| ILMN_2300186 | DYNLL1   | -0.18 | 10.73 | -4.06 | 9.85E-05  | 0.0007089 | 0.75 |
| ILMN_1734740 | GPR65    | 0.16  | 6.76  | 4.06  | 9.87E-05  | 0.0007101 | 0.75 |
| ILMN_1657870 | ABL2     | 0.12  | 6.52  | 4.06  | 9.95E-05  | 0.0007156 | 0.74 |
| ILMN_2186858 | ZNF839   | -0.22 | 7.84  | -4.06 | 9.96E-05  | 0.0007165 | 0.74 |
| ILMN_1763907 | CENPW    | 0.33  | 7.89  | 4.06  | 9.97E-05  | 0.0007167 | 0.74 |
| ILMN_3235832 | NA       | 0.52  | 7.17  | 4.06  | 9.99E-05  | 0.0007176 | 0.74 |
| ILMN_3251232 | HMGN2    | -0.13 | 6.99  | -4.06 | 9.98E-05  | 0.0007176 | 0.74 |
| ILMN_1812721 | HIP1R    | -0.24 | 8.79  | -4.06 | 0.0001001 | 0.0007191 | 0.74 |

|              |          |       |       |       |           |           |      |
|--------------|----------|-------|-------|-------|-----------|-----------|------|
| ILMN_1689908 | ANKRD13A | -0.23 | 9.58  | -4.06 | 0.0001004 | 0.000721  | 0.74 |
| ILMN_1682792 | BYSL     | 0.18  | 7.11  | 4.06  | 0.0001005 | 0.0007222 | 0.73 |
| ILMN_1676423 | CCNC     | 0.17  | 7.90  | 4.05  | 0.0001008 | 0.0007239 | 0.73 |
| ILMN_1887505 | NA       | -0.12 | 6.58  | -4.05 | 0.0001011 | 0.0007257 | 0.73 |
| ILMN_2043060 | PLCH1    | -0.13 | 6.73  | -4.05 | 0.0001011 | 0.000726  | 0.73 |
| ILMN_1789463 | FXYD1    | 0.15  | 6.75  | 4.05  | 0.0001012 | 0.0007265 | 0.73 |
| ILMN_2174437 | CIDEC    | 0.77  | 8.31  | 4.05  | 0.0001015 | 0.000728  | 0.73 |
| ILMN_1774901 | GDPD3    | -0.40 | 8.30  | -4.05 | 0.0001018 | 0.0007301 | 0.72 |
| ILMN_1771962 | GLI3     | 0.13  | 6.67  | 4.05  | 0.0001019 | 0.0007305 | 0.72 |
| ILMN_2305225 | NDRG4    | 0.14  | 6.75  | 4.05  | 0.0001019 | 0.0007307 | 0.72 |
| ILMN_1665135 | RBBP6    | 0.12  | 6.61  | 4.05  | 0.000102  | 0.000731  | 0.72 |
| ILMN_1676631 | CCNO     | 0.28  | 7.33  | 4.05  | 0.0001025 | 0.0007343 | 0.72 |
| ILMN_3246054 | MMP19    | 0.13  | 6.57  | 4.05  | 0.0001026 | 0.0007353 | 0.72 |
| ILMN_3239155 | NA       | -0.12 | 6.61  | -4.05 | 0.0001027 | 0.0007356 | 0.71 |
| ILMN_1767475 | CERK     | -0.20 | 8.76  | -4.05 | 0.0001027 | 0.0007358 | 0.71 |
| ILMN_1787680 | VIMP     | -0.18 | 11.16 | -4.05 | 0.0001027 | 0.0007358 | 0.71 |
| ILMN_1742544 | MEF2C    | 0.28  | 7.41  | 4.05  | 0.0001028 | 0.0007363 | 0.71 |
| ILMN_1834842 | NA       | -0.15 | 6.92  | -4.05 | 0.0001032 | 0.0007385 | 0.71 |
| ILMN_1717765 | NUDT11   | 0.11  | 6.59  | 4.05  | 0.0001032 | 0.0007388 | 0.71 |
| ILMN_1852384 | ERC1     | 0.15  | 7.36  | 4.05  | 0.0001033 | 0.0007392 | 0.71 |
| ILMN_1765409 | STAM     | 0.16  | 7.49  | 4.05  | 0.0001033 | 0.0007392 | 0.71 |
| ILMN_1761450 | DHRS4L2  | -0.21 | 7.30  | -4.05 | 0.0001035 | 0.0007401 | 0.71 |
| ILMN_2119535 | RIPK1    | -0.21 | 8.22  | -4.05 | 0.0001036 | 0.0007411 | 0.71 |
| ILMN_1792910 | MNT      | 0.21  | 7.80  | 4.05  | 0.0001038 | 0.0007422 | 0.70 |
| ILMN_1730084 | COMT     | 0.23  | 9.05  | 4.04  | 0.0001045 | 0.0007472 | 0.70 |
| ILMN_2100258 | PCDHB16  | 0.13  | 6.53  | 4.04  | 0.0001046 | 0.0007475 | 0.70 |
| ILMN_1766925 | CDH13    | 0.15  | 6.61  | 4.04  | 0.0001047 | 0.0007479 | 0.70 |
| ILMN_1808249 | MS4A8    | -0.40 | 7.55  | -4.04 | 0.0001047 | 0.0007479 | 0.70 |
| ILMN_1676842 | BTAF1    | 0.19  | 9.06  | 4.04  | 0.0001049 | 0.0007491 | 0.69 |
| ILMN_1768482 | CD8A     | 0.35  | 7.45  | 4.04  | 0.0001051 | 0.0007503 | 0.69 |
| ILMN_1764158 | NLGN2    | 0.17  | 6.95  | 4.04  | 0.0001051 | 0.0007503 | 0.70 |
| ILMN_2222991 | ETF1     | 0.18  | 7.34  | 4.04  | 0.0001054 | 0.0007523 | 0.69 |
| ILMN_1812616 | MYO1C    | -0.19 | 8.01  | -4.04 | 0.0001054 | 0.0007524 | 0.69 |
| ILMN_1702691 | TNFAIP3  | 0.37  | 7.65  | 4.04  | 0.0001059 | 0.0007558 | 0.68 |
| ILMN_2356068 | CDK13    | -0.16 | 7.90  | -4.04 | 0.0001059 | 0.0007558 | 0.68 |
| ILMN_1737847 | RMND5B   | -0.12 | 6.93  | -4.04 | 0.0001062 | 0.0007574 | 0.68 |
| ILMN_1714167 | CYB5A    | -0.29 | 9.63  | -4.04 | 0.0001063 | 0.0007579 | 0.68 |
| ILMN_2207363 | RABAC1   | -0.23 | 8.89  | -4.04 | 0.0001066 | 0.0007602 | 0.68 |
| ILMN_1809639 | TMEM26   | 0.16  | 6.84  | 4.04  | 0.0001067 | 0.0007604 | 0.68 |
| ILMN_1714108 | TP53INP1 | 0.44  | 9.27  | 4.04  | 0.0001067 | 0.0007606 | 0.68 |
| ILMN_1757343 | PABPC4   | 0.29  | 9.81  | 4.04  | 0.0001069 | 0.0007613 | 0.68 |
| ILMN_1674506 | MED23    | -0.13 | 7.82  | -4.04 | 0.0001069 | 0.0007616 | 0.68 |
| ILMN_1713732 | ABL1     | 0.21  | 8.48  | 4.04  | 0.0001072 | 0.0007636 | 0.67 |
| ILMN_1692684 | SMARCD2  | -0.20 | 7.53  | -4.04 | 0.0001073 | 0.0007641 | 0.67 |
| ILMN_2394193 | VCPKMT   | 0.19  | 7.78  | 4.04  | 0.0001076 | 0.0007657 | 0.67 |
| ILMN_1716922 | DHX16    | -0.14 | 8.88  | -4.04 | 0.000108  | 0.0007685 | 0.67 |
| ILMN_1832208 | TMEM33   | -0.16 | 9.44  | -4.04 | 0.000108  | 0.0007685 | 0.67 |
| ILMN_1680251 | SORCS1   | 0.18  | 7.10  | 4.04  | 0.0001082 | 0.0007699 | 0.66 |

|              |            |       |       |       |           |           |      |
|--------------|------------|-------|-------|-------|-----------|-----------|------|
| ILMN_1702787 | SEMA4A     | 0.24  | 7.14  | 4.03  | 0.0001085 | 0.0007715 | 0.66 |
| ILMN_2352121 | NT5C3A     | -0.18 | 10.07 | -4.03 | 0.0001087 | 0.0007732 | 0.66 |
| ILMN_1802377 | IQCG       | 0.20  | 6.99  | 4.03  | 0.0001089 | 0.0007744 | 0.66 |
| ILMN_1724422 | SELL       | 0.39  | 6.87  | 4.03  | 0.0001091 | 0.0007755 | 0.66 |
| ILMN_1716465 | RBP7       | 0.20  | 6.93  | 4.03  | 0.0001094 | 0.0007773 | 0.65 |
| ILMN_1718520 | RNLS       | -0.18 | 7.65  | -4.03 | 0.0001094 | 0.0007773 | 0.65 |
| ILMN_1790881 | HNMT       | -0.32 | 8.95  | -4.03 | 0.0001095 | 0.0007782 | 0.65 |
| ILMN_2234697 | BEX1       | 0.24  | 6.76  | 4.03  | 0.0001098 | 0.0007796 | 0.65 |
| ILMN_2402674 | DPM3       | -0.21 | 8.50  | -4.03 | 0.0001098 | 0.0007796 | 0.65 |
| ILMN_1688180 | ASPSCR1    | -0.12 | 6.76  | -4.03 | 0.0001098 | 0.0007798 | 0.65 |
| ILMN_1903159 | PPM1A      | -0.18 | 8.37  | -4.03 | 0.0001099 | 0.0007798 | 0.65 |
| ILMN_1684520 | TSTD2      | -0.13 | 6.92  | -4.03 | 0.0001101 | 0.0007811 | 0.65 |
| ILMN_1685917 | EMCN       | 0.14  | 6.57  | 4.03  | 0.0001101 | 0.0007811 | 0.65 |
| ILMN_1749641 | FBXO3      | -0.17 | 7.39  | -4.03 | 0.0001102 | 0.0007817 | 0.65 |
| ILMN_3241834 | RPL7       | 0.25  | 8.46  | 4.03  | 0.0001108 | 0.0007857 | 0.64 |
| ILMN_1733421 | PRKCQ      | 0.18  | 6.89  | 4.03  | 0.0001109 | 0.0007857 | 0.64 |
| ILMN_1797534 | RIOK1      | 0.15  | 7.49  | 4.03  | 0.0001108 | 0.0007857 | 0.64 |
| ILMN_1846517 | LOC1005057 | -0.19 | 7.07  | -4.03 | 0.0001108 | 0.0007857 | 0.64 |
| ILMN_1764970 | JMJD1C     | 0.22  | 8.76  | 4.03  | 0.0001112 | 0.0007878 | 0.64 |
| ILMN_1812226 | ICAM1      | 0.18  | 6.67  | 4.03  | 0.0001113 | 0.0007889 | 0.64 |
| ILMN_1773742 | DNAJB9     | 0.33  | 8.47  | 4.03  | 0.0001117 | 0.0007912 | 0.63 |
| ILMN_1704531 | PTGR1      | -0.27 | 7.81  | -4.03 | 0.0001123 | 0.0007951 | 0.63 |
| ILMN_1752935 | TMEM30B    | -0.29 | 9.82  | -4.03 | 0.0001123 | 0.0007955 | 0.64 |
| ILMN_1661461 | NA         | -0.16 | 6.57  | -4.02 | 0.0001128 | 0.0007984 | 0.63 |
| ILMN_1791375 | NA         | -0.28 | 8.97  | -4.02 | 0.0001128 | 0.0007985 | 0.63 |
| ILMN_1721977 | NAA10      | 0.20  | 7.76  | 4.02  | 0.0001131 | 0.0008003 | 0.63 |
| ILMN_2400512 | PRKCSH     | -0.14 | 6.86  | -4.02 | 0.0001132 | 0.0008011 | 0.62 |
| ILMN_1657435 | MT1M       | -1.02 | 9.26  | -4.02 | 0.0001134 | 0.0008018 | 0.63 |
| ILMN_1665423 | ZFP91      | -0.14 | 10.39 | -4.02 | 0.0001134 | 0.0008018 | 0.62 |
| ILMN_2323944 | FAM110A    | 0.19  | 7.27  | 4.02  | 0.0001134 | 0.0008018 | 0.62 |
| ILMN_1716728 | SAYS1      | -0.16 | 7.28  | -4.02 | 0.0001136 | 0.0008032 | 0.62 |
| ILMN_1698685 | MATN2      | 0.18  | 7.21  | 4.02  | 0.0001139 | 0.0008048 | 0.62 |
| ILMN_3288755 | NA         | -0.19 | 7.49  | -4.02 | 0.0001142 | 0.0008069 | 0.61 |
| ILMN_1799069 | CNOT6L     | 0.24  | 7.40  | 4.02  | 0.0001143 | 0.0008074 | 0.61 |
| ILMN_2331231 | NA         | 0.57  | 7.39  | 4.02  | 0.0001143 | 0.0008077 | 0.61 |
| ILMN_1776412 | KRTAP10-11 | -0.12 | 6.70  | -4.02 | 0.0001145 | 0.0008088 | 0.61 |
| ILMN_1737918 | C1QA       | 0.24  | 7.18  | 4.02  | 0.0001149 | 0.0008115 | 0.61 |
| ILMN_3234756 | SNORD6     | 0.11  | 6.84  | 4.02  | 0.0001153 | 0.0008136 | 0.61 |
| ILMN_1739083 | SIRT1      | 0.20  | 7.88  | 4.02  | 0.0001155 | 0.0008152 | 0.60 |
| ILMN_2186319 | TSPAN2     | 0.12  | 6.56  | 4.02  | 0.0001155 | 0.0008152 | 0.60 |
| ILMN_1701596 | RPS20      | 0.19  | 12.62 | 4.02  | 0.0001157 | 0.0008162 | 0.60 |
| ILMN_2043816 | ARPC5L     | 0.20  | 8.29  | 4.02  | 0.0001159 | 0.0008173 | 0.60 |
| ILMN_1700144 | ITGA10     | 0.17  | 6.80  | 4.02  | 0.0001161 | 0.0008188 | 0.60 |
| ILMN_1715702 | MAPK1IP1L  | 0.22  | 7.33  | 4.02  | 0.0001163 | 0.0008201 | 0.61 |
| ILMN_1687266 | NA         | -0.13 | 6.63  | -4.02 | 0.0001164 | 0.0008208 | 0.60 |
| ILMN_1767256 | MBTPS1     | -0.17 | 7.64  | -4.01 | 0.0001169 | 0.000824  | 0.59 |
| ILMN_1652409 | SPATA7     | 0.17  | 7.29  | 4.02  | 0.000117  | 0.0008242 | 0.60 |
| ILMN_1754179 | AP1G2      | -0.22 | 8.16  | -4.01 | 0.0001171 | 0.0008246 | 0.59 |

|              |          |       |       |       |           |           |      |
|--------------|----------|-------|-------|-------|-----------|-----------|------|
| ILMN_1654629 | TMEM175  | -0.18 | 8.19  | -4.01 | 0.0001171 | 0.000825  | 0.59 |
| ILMN_1682273 | SHISA3   | 0.11  | 6.55  | 4.01  | 0.0001173 | 0.0008258 | 0.59 |
| ILMN_1692191 | GNA12    | 0.11  | 6.50  | 4.01  | 0.0001175 | 0.000827  | 0.59 |
| ILMN_1657470 | YTHDF3   | -0.13 | 8.21  | -4.01 | 0.0001176 | 0.0008281 | 0.59 |
| ILMN_1725707 | ATG16L1  | 0.19  | 8.63  | 4.01  | 0.0001181 | 0.000831  | 0.58 |
| ILMN_1712914 | SEMA6B   | 0.13  | 6.70  | 4.01  | 0.0001182 | 0.0008317 | 0.58 |
| ILMN_1755134 | HSPA4    | -0.10 | 6.77  | -4.01 | 0.0001183 | 0.0008325 | 0.58 |
| ILMN_1671291 | EIF3I    | 0.19  | 9.79  | 4.01  | 0.0001184 | 0.0008327 | 0.58 |
| ILMN_2375830 | DIXDC1   | 0.12  | 6.81  | 4.01  | 0.0001196 | 0.0008411 | 0.57 |
| ILMN_1704571 | FAM53B   | -0.17 | 8.00  | -4.01 | 0.0001197 | 0.0008412 | 0.57 |
| ILMN_1786847 | TGM3     | -0.16 | 6.82  | -4.01 | 0.00012   | 0.0008433 | 0.57 |
| ILMN_1741204 | KLHDC2   | -0.28 | 8.86  | -4.01 | 0.0001202 | 0.0008444 | 0.57 |
| ILMN_1808405 | HLA-DQA1 | 0.78  | 9.24  | 4.01  | 0.0001202 | 0.0008445 | 0.57 |
| ILMN_1708845 | MTNR1A   | -0.12 | 6.53  | -4.01 | 0.0001204 | 0.0008456 | 0.56 |
| ILMN_2153485 | NMNAT3   | -0.17 | 7.03  | -4.01 | 0.0001206 | 0.0008466 | 0.56 |
| ILMN_1721741 | NA       | -0.19 | 8.51  | -4.01 | 0.0001206 | 0.0008468 | 0.56 |
| ILMN_2264681 | LETMD1   | -0.14 | 6.82  | -4.00 | 0.0001208 | 0.0008482 | 0.56 |
| ILMN_3261197 | ATP5E    | -0.22 | 10.06 | -4.00 | 0.0001211 | 0.0008498 | 0.56 |
| ILMN_1656274 | PRPF38A  | -0.18 | 7.72  | -4.00 | 0.0001213 | 0.0008513 | 0.56 |
| ILMN_1821280 | GDF11    | 0.14  | 7.16  | 4.00  | 0.0001213 | 0.0008513 | 0.56 |
| ILMN_1761844 | ZCCHC17  | 0.13  | 7.80  | 4.00  | 0.0001214 | 0.0008518 | 0.56 |
| ILMN_1769810 | ARL6IP5  | 0.19  | 10.62 | 4.00  | 0.0001217 | 0.0008537 | 0.55 |
| ILMN_1751901 | TMEM163  | 0.25  | 6.64  | 4.00  | 0.000122  | 0.0008552 | 0.55 |
| ILMN_1755354 | YBX2     | -0.41 | 7.41  | -4.00 | 0.0001222 | 0.0008564 | 0.55 |
| ILMN_1683494 | TMEM154  | 0.26  | 7.31  | 4.00  | 0.0001222 | 0.0008565 | 0.56 |
| ILMN_2313074 | DEDD     | 0.15  | 8.15  | 4.00  | 0.0001227 | 0.0008596 | 0.55 |
| ILMN_1810274 | HOXB2    | 0.22  | 6.94  | 4.00  | 0.0001229 | 0.0008609 | 0.54 |
| ILMN_1781795 | ERH      | 0.25  | 9.59  | 4.00  | 0.000123  | 0.0008615 | 0.54 |
| ILMN_1749915 | RSRP1    | -0.34 | 8.92  | -4.00 | 0.0001233 | 0.0008635 | 0.54 |
| ILMN_1665455 | DCUN1D3  | 0.18  | 7.47  | 4.00  | 0.0001234 | 0.0008642 | 0.54 |
| ILMN_1659857 | SNAP29   | -0.17 | 7.63  | -4.00 | 0.0001236 | 0.0008651 | 0.54 |
| ILMN_1746658 | RORB     | 0.10  | 6.35  | 4.00  | 0.0001236 | 0.0008651 | 0.54 |
| ILMN_2074044 | PLS1     | -0.36 | 10.86 | -4.00 | 0.0001238 | 0.0008662 | 0.54 |
| ILMN_2343010 | BOLA3    | -0.19 | 9.95  | -4.00 | 0.0001238 | 0.0008663 | 0.54 |
| ILMN_2203768 | PRR15    | -0.20 | 6.88  | -4.00 | 0.0001243 | 0.0008692 | 0.54 |
| ILMN_2333367 | FKBP1A   | -0.28 | 8.83  | -4.00 | 0.0001244 | 0.00087   | 0.53 |
| ILMN_1746686 | POLR1C   | 0.21  | 8.42  | 4.00  | 0.0001245 | 0.0008703 | 0.53 |
| ILMN_1778352 | ABCC6    | -0.09 | 6.49  | -4.00 | 0.000125  | 0.0008737 | 0.53 |
| ILMN_3223317 | PRELID1  | -0.25 | 7.74  | -4.00 | 0.0001251 | 0.0008745 | 0.53 |
| ILMN_1753913 | WLS      | -0.21 | 7.28  | -4.00 | 0.0001252 | 0.0008746 | 0.53 |
| ILMN_1783161 | DAB2IP   | -0.15 | 6.86  | -4.00 | 0.0001253 | 0.000875  | 0.53 |
| ILMN_1714737 | ASF1A    | -0.14 | 7.56  | -4.00 | 0.0001255 | 0.0008762 | 0.53 |
| ILMN_3210917 | SET      | 0.15  | 10.87 | 3.99  | 0.0001255 | 0.0008766 | 0.52 |
| ILMN_1712896 | FST      | 0.18  | 6.51  | 3.99  | 0.0001257 | 0.0008774 | 0.52 |
| ILMN_1743582 | NUDT22   | -0.21 | 7.82  | -3.99 | 0.0001257 | 0.0008777 | 0.52 |
| ILMN_2119297 | SAMD4A   | 0.12  | 6.56  | 3.99  | 0.0001261 | 0.00088   | 0.52 |
| ILMN_1754555 | SVOPL    | -0.14 | 6.36  | -3.99 | 0.0001261 | 0.00088   | 0.52 |
| ILMN_1749962 | NCAM2    | 0.11  | 6.41  | 3.99  | 0.0001266 | 0.000883  | 0.52 |

|              |           |       |       |       |           |           |      |
|--------------|-----------|-------|-------|-------|-----------|-----------|------|
| ILMN_1667813 | RPL7      | 0.18  | 12.31 | 3.99  | 0.0001269 | 0.0008848 | 0.51 |
| ILMN_1767459 | POLR3B    | -0.17 | 7.85  | -3.99 | 0.0001274 | 0.0008885 | 0.51 |
| ILMN_3243366 | KIAA1211L | -0.25 | 7.60  | -3.99 | 0.000128  | 0.0008924 | 0.51 |
| ILMN_1767900 | LGI2      | 0.17  | 6.63  | 3.99  | 0.0001282 | 0.0008933 | 0.50 |
| ILMN_1670895 | ZNF207    | 0.15  | 9.08  | 3.99  | 0.0001283 | 0.0008938 | 0.50 |
| ILMN_1681679 | TSPO      | -0.20 | 11.79 | -3.99 | 0.0001283 | 0.0008941 | 0.50 |
| ILMN_1682197 | NFXL1     | 0.14  | 7.50  | 3.99  | 0.0001286 | 0.000896  | 0.50 |
| ILMN_1651336 | MLYCD     | -0.11 | 6.83  | -3.99 | 0.0001287 | 0.0008962 | 0.50 |
| ILMN_2094360 | NR2F2     | 0.23  | 8.46  | 3.99  | 0.0001287 | 0.0008962 | 0.50 |
| ILMN_1764090 | AK4       | -0.24 | 7.35  | -3.99 | 0.0001288 | 0.0008966 | 0.50 |
| ILMN_1728512 | YWHAH     | -0.15 | 11.52 | -3.99 | 0.0001288 | 0.0008966 | 0.50 |
| ILMN_1669376 | DRAM1     | 0.32  | 7.52  | 3.99  | 0.000129  | 0.0008975 | 0.50 |
| ILMN_1651285 | BCL6B     | 0.17  | 6.92  | 3.99  | 0.000129  | 0.0008977 | 0.50 |
| ILMN_3291098 | RPL29     | 0.21  | 11.96 | 3.99  | 0.0001291 | 0.0008978 | 0.50 |
| ILMN_1723092 | CRB3      | -0.22 | 8.38  | -3.99 | 0.0001292 | 0.0008984 | 0.50 |
| ILMN_1801257 | CENPA     | 0.23  | 6.95  | 3.99  | 0.0001293 | 0.0008988 | 0.50 |
| ILMN_1657373 | P3H2      | 0.54  | 8.51  | 3.99  | 0.0001294 | 0.0008997 | 0.50 |
| ILMN_1837935 | TNPO1     | 0.17  | 8.15  | 3.99  | 0.0001298 | 0.0009026 | 0.49 |
| ILMN_1757391 | TMEM50B   | -0.14 | 7.00  | -3.98 | 0.00013   | 0.0009033 | 0.49 |
| ILMN_1767542 | THAP10    | -0.15 | 7.15  | -3.98 | 0.0001302 | 0.0009049 | 0.49 |
| ILMN_1662328 | CNNM3     | -0.18 | 7.91  | -3.98 | 0.0001303 | 0.000905  | 0.49 |
| ILMN_3251155 | PCBP2     | -0.24 | 7.68  | -3.98 | 0.0001303 | 0.0009051 | 0.49 |
| ILMN_3310643 | VTRNA2-1  | 0.16  | 6.64  | 3.98  | 0.0001307 | 0.0009076 | 0.49 |
| ILMN_1683792 | LAP3      | 0.27  | 9.40  | 3.98  | 0.0001314 | 0.000912  | 0.48 |
| ILMN_1739397 | GLMN      | 0.17  | 7.72  | 3.98  | 0.0001314 | 0.0009121 | 0.48 |
| ILMN_2048478 | SLC22A3   | 0.12  | 6.41  | 3.98  | 0.0001317 | 0.0009141 | 0.48 |
| ILMN_1701131 | C2orf49   | 0.13  | 7.06  | 3.98  | 0.0001318 | 0.0009143 | 0.48 |
| ILMN_2220187 | GFPT1     | -0.26 | 9.97  | -3.98 | 0.0001318 | 0.0009143 | 0.48 |
| ILMN_1691892 | TAGLN2    | 0.21  | 7.69  | 3.98  | 0.000132  | 0.0009155 | 0.48 |
| ILMN_1680424 | CTSG      | 0.62  | 7.73  | 3.98  | 0.0001322 | 0.0009167 | 0.48 |
| ILMN_1913641 | NA        | 0.18  | 6.85  | 3.98  | 0.0001323 | 0.0009169 | 0.48 |
| ILMN_2334042 | THYN1     | -0.18 | 7.98  | -3.98 | 0.0001327 | 0.0009195 | 0.47 |
| ILMN_1681467 | RAB11FIP4 | -0.13 | 6.73  | -3.98 | 0.000133  | 0.0009215 | 0.47 |
| ILMN_1712269 | ZNF605    | -0.12 | 6.75  | -3.98 | 0.0001332 | 0.0009231 | 0.47 |
| ILMN_2353202 | PTK7      | 0.11  | 6.69  | 3.98  | 0.0001333 | 0.0009237 | 0.47 |
| ILMN_1814799 | S100A13   | 0.12  | 6.43  | 3.98  | 0.0001336 | 0.0009252 | 0.47 |
| ILMN_1677085 | RGS19     | 0.27  | 7.45  | 3.98  | 0.0001337 | 0.0009257 | 0.47 |
| ILMN_1752117 | TMEM55A   | 0.17  | 6.90  | 3.98  | 0.0001339 | 0.0009266 | 0.46 |
| ILMN_1654875 | CLC       | 0.53  | 7.29  | 3.98  | 0.000134  | 0.0009277 | 0.46 |
| ILMN_1705047 | TLR8      | 0.13  | 6.45  | 3.98  | 0.0001342 | 0.0009288 | 0.46 |
| ILMN_1813207 | MRPS9     | -0.19 | 8.02  | -3.97 | 0.0001348 | 0.0009327 | 0.46 |
| ILMN_2383611 | PTPRE     | 0.23  | 8.93  | 3.98  | 0.0001348 | 0.0009327 | 0.46 |
| ILMN_1730879 | CBY1      | -0.20 | 7.89  | -3.97 | 0.0001353 | 0.0009354 | 0.45 |
| ILMN_1803846 | EIF1      | 0.19  | 11.00 | 3.97  | 0.0001353 | 0.0009354 | 0.45 |
| ILMN_2224031 | CETN3     | -0.19 | 8.26  | -3.97 | 0.0001353 | 0.0009354 | 0.45 |
| ILMN_1750400 | C19orf66  | 0.18  | 7.19  | 3.97  | 0.0001355 | 0.0009363 | 0.45 |
| ILMN_1815719 | PLCG2     | 0.58  | 8.78  | 3.97  | 0.0001356 | 0.000937  | 0.45 |
| ILMN_1729288 | C1QTNF6   | -0.16 | 6.89  | -3.97 | 0.0001356 | 0.0009371 | 0.45 |



|              |           |       |       |       |           |           |      |
|--------------|-----------|-------|-------|-------|-----------|-----------|------|
| ILMN_2123567 | SENP2     | 0.13  | 7.85  | 3.97  | 0.000136  | 0.0009396 | 0.45 |
| ILMN_1663444 | LIN7B     | -0.12 | 6.62  | -3.97 | 0.0001363 | 0.0009413 | 0.45 |
| ILMN_1728830 | GRK5      | 0.15  | 6.85  | 3.97  | 0.0001364 | 0.0009417 | 0.45 |
| ILMN_1691702 | ZNF775    | -0.17 | 6.87  | -3.97 | 0.0001371 | 0.0009461 | 0.44 |
| ILMN_1797861 | IL6ST     | 0.11  | 6.56  | 3.97  | 0.0001375 | 0.0009494 | 0.44 |
| ILMN_3243061 | SIGLEC14  | 0.26  | 6.90  | 3.97  | 0.0001376 | 0.0009497 | 0.44 |
| ILMN_2231928 | MX2       | 0.35  | 7.19  | 3.97  | 0.0001377 | 0.0009502 | 0.44 |
| ILMN_1690682 | B3GALT4   | -0.17 | 7.24  | -3.97 | 0.0001379 | 0.0009505 | 0.44 |
| ILMN_1751776 | CKAP2L    | 0.22  | 6.87  | 3.97  | 0.0001378 | 0.0009505 | 0.44 |
| ILMN_3261278 | LINC00526 | -0.10 | 6.59  | -3.97 | 0.0001378 | 0.0009505 | 0.44 |
| ILMN_1795918 | AGAP3     | 0.13  | 7.21  | 3.97  | 0.0001382 | 0.0009527 | 0.43 |
| ILMN_1814165 | SSBP3     | -0.13 | 6.91  | -3.97 | 0.0001384 | 0.0009538 | 0.43 |
| ILMN_1754547 | R3HDM1    | 0.18  | 7.19  | 3.97  | 0.0001388 | 0.0009564 | 0.43 |
| ILMN_2352448 | NSUN5P1   | -0.19 | 7.24  | -3.97 | 0.0001391 | 0.0009586 | 0.43 |
| ILMN_2322498 | RORA      | 0.12  | 6.54  | 3.97  | 0.0001392 | 0.0009587 | 0.43 |
| ILMN_1796119 | ZUFSP     | 0.13  | 7.56  | 3.96  | 0.0001398 | 0.0009629 | 0.42 |
| ILMN_1796762 | CCDC102A  | 0.18  | 6.93  | 3.96  | 0.0001398 | 0.0009629 | 0.42 |
| ILMN_1911721 | NA        | 0.19  | 7.12  | 3.96  | 0.0001399 | 0.0009632 | 0.42 |
| ILMN_1726421 | METTL9    | 0.13  | 7.01  | 3.96  | 0.00014   | 0.0009637 | 0.42 |
| ILMN_2345512 | PPP4R1    | 0.17  | 8.56  | 3.96  | 0.00014   | 0.0009637 | 0.42 |
| ILMN_1673543 | PGM2      | 0.15  | 7.41  | 3.96  | 0.0001402 | 0.0009644 | 0.42 |
| ILMN_2205882 | NSUN7     | -0.18 | 7.04  | -3.96 | 0.0001416 | 0.0009737 | 0.41 |
| ILMN_1676792 | RPS11     | 0.29  | 11.19 | 3.96  | 0.0001417 | 0.0009747 | 0.41 |
| ILMN_2340027 | TSPAN4    | 0.16  | 6.83  | 3.96  | 0.0001425 | 0.0009798 | 0.40 |
| ILMN_1725244 | HAT1      | 0.23  | 8.28  | 3.96  | 0.0001429 | 0.0009825 | 0.40 |
| ILMN_1707350 | TUSC1     | -0.14 | 6.91  | -3.96 | 0.000143  | 0.0009826 | 0.40 |
| ILMN_1707448 | CDK12     | 0.45  | 7.92  | 3.96  | 0.000143  | 0.0009826 | 0.40 |
| ILMN_1769383 | NA        | 0.26  | 7.42  | 3.96  | 0.0001432 | 0.0009839 | 0.40 |
| ILMN_1809094 | NA        | -0.18 | 6.99  | -3.96 | 0.0001436 | 0.0009862 | 0.40 |
| ILMN_1666670 | RBX1      | 0.15  | 9.88  | 3.96  | 0.0001436 | 0.0009865 | 0.40 |
| ILMN_1682737 | CHRD12    | 0.22  | 6.65  | 3.96  | 0.0001437 | 0.0009868 | 0.40 |
| ILMN_1801852 | SEC61B    | 0.21  | 10.79 | 3.96  | 0.0001441 | 0.0009893 | 0.39 |
| ILMN_2349610 | DPH3      | 0.15  | 7.39  | 3.96  | 0.0001447 | 0.0009934 | 0.39 |
| ILMN_1682572 | C2CD5     | -0.17 | 9.29  | -3.95 | 0.000145  | 0.0009948 | 0.39 |
| ILMN_1700975 | ENSA      | 0.11  | 6.35  | 3.95  | 0.000145  | 0.0009948 | 0.39 |
| ILMN_1712413 | RPL39L    | 0.18  | 7.00  | 3.95  | 0.0001451 | 0.0009952 | 0.39 |
| ILMN_1758599 | FAM163A   | 0.10  | 6.38  | 3.95  | 0.0001452 | 0.0009959 | 0.39 |
| ILMN_1701947 | GPR34     | 0.33  | 7.31  | 3.95  | 0.0001458 | 0.0009998 | 0.38 |
| ILMN_1731418 | SP110     | 0.29  | 8.40  | 3.95  | 0.0001459 | 0.0010002 | 0.38 |
| ILMN_1799082 | ZNF609    | 0.11  | 6.93  | 3.95  | 0.000146  | 0.0010005 | 0.38 |
| ILMN_1677429 | TWIST2    | 0.13  | 6.61  | 3.95  | 0.0001466 | 0.0010047 | 0.38 |
| ILMN_2371433 | MID1      | -0.13 | 6.75  | -3.95 | 0.0001466 | 0.0010047 | 0.38 |
| ILMN_1768273 | POP1      | 0.11  | 6.57  | 3.95  | 0.000147  | 0.001007  | 0.38 |
| ILMN_1670145 | DFNA5     | 0.24  | 7.24  | 3.95  | 0.0001481 | 0.0010141 | 0.37 |
| ILMN_1736863 | TMEM140   | -0.29 | 7.72  | -3.95 | 0.0001481 | 0.0010144 | 0.37 |
| ILMN_1700248 | WDR86     | 0.10  | 6.49  | 3.95  | 0.0001488 | 0.0010184 | 0.36 |
| ILMN_1667744 | MPPE1     | -0.12 | 6.75  | -3.95 | 0.0001489 | 0.0010193 | 0.36 |
| ILMN_1706261 | SLCO3A1   | 0.11  | 6.66  | 3.95  | 0.0001492 | 0.0010209 | 0.36 |

|              |            |       |       |       |           |           |      |
|--------------|------------|-------|-------|-------|-----------|-----------|------|
| ILMN_1727348 | NMD3       | 0.21  | 7.75  | 3.95  | 0.0001494 | 0.0010221 | 0.36 |
| ILMN_2390974 | DNAJB2     | -0.19 | 9.09  | -3.95 | 0.0001494 | 0.0010221 | 0.36 |
| ILMN_2296860 | ADGRE4P    | 0.13  | 6.43  | 3.95  | 0.0001495 | 0.0010225 | 0.36 |
| ILMN_1747593 | ISLR       | 0.23  | 6.86  | 3.94  | 0.0001501 | 0.0010263 | 0.36 |
| ILMN_1671326 | AGO1       | -0.13 | 7.31  | -3.94 | 0.0001506 | 0.0010293 | 0.35 |
| ILMN_1701127 | CC2D1A     | -0.13 | 6.94  | -3.94 | 0.0001508 | 0.0010309 | 0.35 |
| ILMN_1727098 | PPP1R16B   | 0.37  | 7.35  | 3.94  | 0.0001525 | 0.0010422 | 0.35 |
| ILMN_3178013 | NA         | -0.12 | 6.55  | -3.94 | 0.0001527 | 0.0010431 | 0.34 |
| ILMN_3213531 | NA         | 0.17  | 11.80 | 3.94  | 0.0001527 | 0.0010431 | 0.34 |
| ILMN_1692539 | SH3BP1     | -0.20 | 7.38  | -3.94 | 0.0001532 | 0.0010463 | 0.34 |
| ILMN_1668514 | PIP5K1C    | 0.17  | 7.49  | 3.94  | 0.0001534 | 0.0010473 | 0.34 |
| ILMN_2362847 | PPARA      | -0.15 | 6.85  | -3.94 | 0.0001534 | 0.0010476 | 0.33 |
| ILMN_2128293 | APIP       | 0.31  | 7.54  | 3.94  | 0.0001535 | 0.0010479 | 0.33 |
| ILMN_1694233 | ACYP1      | -0.17 | 8.21  | -3.94 | 0.000154  | 0.0010507 | 0.33 |
| ILMN_1722102 | ANAPC11    | -0.15 | 8.61  | -3.94 | 0.0001543 | 0.0010529 | 0.33 |
| ILMN_1686109 | CCL23      | -0.74 | 8.08  | -3.94 | 0.0001545 | 0.0010541 | 0.33 |
| ILMN_1808226 | RGS16      | 0.15  | 6.55  | 3.94  | 0.0001545 | 0.0010541 | 0.33 |
| ILMN_1783846 | RAPH1      | 0.19  | 8.13  | 3.94  | 0.0001546 | 0.0010543 | 0.33 |
| ILMN_1715569 | CCDC53     | 0.15  | 8.89  | 3.94  | 0.0001548 | 0.0010551 | 0.33 |
| ILMN_2363591 | SDCBP      | 0.32  | 8.99  | 3.94  | 0.0001549 | 0.0010558 | 0.33 |
| ILMN_1887267 | NA         | 0.16  | 6.62  | 3.94  | 0.0001551 | 0.0010568 | 0.32 |
| ILMN_1660787 | SUCLA2     | -0.20 | 7.93  | -3.93 | 0.0001558 | 0.0010614 | 0.32 |
| ILMN_1798123 | ELOVL1     | -0.15 | 7.57  | -3.93 | 0.000156  | 0.0010627 | 0.32 |
| ILMN_1800713 | B3GALT5    | -0.23 | 6.99  | -3.93 | 0.0001564 | 0.001065  | 0.32 |
| ILMN_2249018 | LRRC26     | -0.44 | 9.78  | -3.93 | 0.0001567 | 0.001067  | 0.31 |
| ILMN_1746836 | PTAFR      | 0.13  | 6.78  | 3.93  | 0.0001568 | 0.0010675 | 0.32 |
| ILMN_1697024 | STYX       | 0.18  | 9.39  | 3.93  | 0.0001572 | 0.0010701 | 0.31 |
| ILMN_1772951 | ST6GALNAC: | -0.41 | 9.59  | -3.93 | 0.0001578 | 0.0010738 | 0.31 |
| ILMN_1725105 | EEF1E1     | 0.24  | 8.52  | 3.93  | 0.000158  | 0.001075  | 0.31 |
| ILMN_1786722 | ZNF385A    | 0.12  | 6.60  | 3.93  | 0.0001581 | 0.0010757 | 0.31 |
| ILMN_1665049 | SPG11      | -0.15 | 9.33  | -3.93 | 0.0001582 | 0.001076  | 0.31 |
| ILMN_1687971 | CAPN3      | -0.18 | 7.33  | -3.93 | 0.0001584 | 0.0010772 | 0.30 |
| ILMN_2381257 | DSC2       | -0.35 | 8.53  | -3.93 | 0.0001584 | 0.0010772 | 0.30 |
| ILMN_1789990 | ARFGEF2    | 0.13  | 6.94  | 3.93  | 0.0001592 | 0.0010822 | 0.31 |
| ILMN_1661490 | PFDN6      | -0.17 | 7.63  | -3.93 | 0.0001594 | 0.0010832 | 0.30 |
| ILMN_1686360 | ZNF124     | -0.12 | 6.75  | -3.93 | 0.0001595 | 0.0010837 | 0.30 |
| ILMN_1666775 | CACNA1C    | 0.20  | 6.72  | 3.93  | 0.0001596 | 0.0010841 | 0.30 |
| ILMN_1807031 | C14orf28   | -0.17 | 7.39  | -3.93 | 0.0001603 | 0.0010884 | 0.29 |
| ILMN_3214389 | HLA-DQB1   | 0.56  | 8.24  | 3.93  | 0.0001603 | 0.0010884 | 0.29 |
| ILMN_1805992 | SHTN1      | -0.20 | 9.05  | -3.92 | 0.0001613 | 0.0010952 | 0.29 |
| ILMN_2097546 | NUDC       | 0.16  | 9.90  | 3.92  | 0.0001617 | 0.0010977 | 0.29 |
| ILMN_2400352 | PIDD1      | -0.16 | 6.82  | -3.92 | 0.0001619 | 0.0010989 | 0.28 |
| ILMN_1661170 | NDUFB8     | -0.15 | 11.13 | -3.92 | 0.0001622 | 0.0011005 | 0.28 |
| ILMN_1691444 | UHRF2      | 0.19  | 7.44  | 3.92  | 0.0001622 | 0.0011006 | 0.29 |
| ILMN_1727617 | XRN2       | 0.20  | 7.69  | 3.92  | 0.0001625 | 0.0011019 | 0.28 |
| ILMN_1748123 | KLHL14     | 0.16  | 6.50  | 3.92  | 0.0001625 | 0.0011019 | 0.28 |
| ILMN_2158336 | SH3GLB2    | -0.25 | 9.87  | -3.92 | 0.0001626 | 0.0011023 | 0.28 |
| ILMN_2294978 | ANG        | -0.27 | 8.34  | -3.92 | 0.0001629 | 0.0011041 | 0.28 |

|              |           |       |       |       |           |           |      |
|--------------|-----------|-------|-------|-------|-----------|-----------|------|
| ILMN_1720850 | BAZ2B     | 0.17  | 9.22  | 3.92  | 0.0001631 | 0.0011051 | 0.28 |
| ILMN_1657295 | CPA6      | -0.18 | 6.71  | -3.92 | 0.000164  | 0.0011108 | 0.28 |
| ILMN_1791332 | ATP50     | -0.15 | 11.41 | -3.92 | 0.0001639 | 0.0011108 | 0.27 |
| ILMN_2171295 | CDK14     | 0.17  | 6.71  | 3.92  | 0.000164  | 0.0011108 | 0.27 |
| ILMN_2403047 | ARL13B    | 0.12  | 6.72  | 3.92  | 0.0001642 | 0.0011117 | 0.27 |
| ILMN_1688670 | CDCP1     | -0.16 | 6.92  | -3.92 | 0.0001643 | 0.0011121 | 0.27 |
| ILMN_1656069 | LINC00482 | -0.13 | 6.53  | -3.92 | 0.0001647 | 0.0011151 | 0.27 |
| ILMN_2221564 | LYAR      | 0.23  | 8.46  | 3.92  | 0.000166  | 0.0011236 | 0.26 |
| ILMN_1782953 | MMP19     | 0.12  | 6.39  | 3.92  | 0.0001663 | 0.001125  | 0.26 |
| ILMN_1809400 | FAM49B    | 0.20  | 7.28  | 3.92  | 0.0001664 | 0.0011259 | 0.26 |
| ILMN_1672121 | CCDC184   | 0.11  | 6.37  | 3.91  | 0.0001684 | 0.0011388 | 0.25 |
| ILMN_1771852 | ZNF575    | -0.14 | 6.57  | -3.91 | 0.0001685 | 0.0011395 | 0.25 |
| ILMN_1796976 | NLRC4     | 0.12  | 6.51  | 3.91  | 0.0001687 | 0.0011408 | 0.25 |
| ILMN_1745356 | CXCL9     | 0.50  | 7.16  | 3.91  | 0.0001693 | 0.0011444 | 0.24 |
| ILMN_2373099 | ZCCHC11   | 0.18  | 7.10  | 3.91  | 0.0001703 | 0.0011508 | 0.24 |
| ILMN_1729167 | EFL1      | -0.16 | 7.61  | -3.91 | 0.0001707 | 0.0011534 | 0.24 |
| ILMN_1689088 | COLEC12   | 0.35  | 7.88  | 3.91  | 0.0001713 | 0.0011567 | 0.23 |
| ILMN_1766165 | SNCA      | 0.15  | 6.60  | 3.91  | 0.0001713 | 0.0011567 | 0.24 |
| ILMN_1853631 | NA        | -0.13 | 6.89  | -3.91 | 0.0001712 | 0.0011567 | 0.24 |
| ILMN_1660869 | NA        | -0.11 | 7.05  | -3.91 | 0.0001722 | 0.0011627 | 0.23 |
| ILMN_2341952 | MRPL35    | -0.22 | 9.33  | -3.91 | 0.0001722 | 0.0011627 | 0.23 |
| ILMN_2339863 | VPS28     | -0.20 | 8.07  | -3.91 | 0.0001726 | 0.0011647 | 0.22 |
| ILMN_1692936 | OVOL1     | -0.13 | 6.72  | -3.91 | 0.0001727 | 0.0011653 | 0.22 |
| ILMN_1755504 | CALCOCO2  | -0.17 | 7.54  | -3.91 | 0.0001731 | 0.0011677 | 0.22 |
| ILMN_2397199 | NDEL1     | 0.15  | 6.81  | 3.91  | 0.0001731 | 0.0011677 | 0.22 |
| ILMN_2359710 | PTP4A3    | 0.19  | 6.77  | 3.90  | 0.0001736 | 0.0011708 | 0.22 |
| ILMN_1795905 | ZBTB4     | 0.16  | 7.14  | 3.90  | 0.0001743 | 0.001175  | 0.21 |
| ILMN_1773337 | DKK1      | 0.24  | 6.63  | 3.90  | 0.0001744 | 0.0011757 | 0.21 |
| ILMN_1735453 | FAM98A    | 0.25  | 8.89  | 3.90  | 0.0001749 | 0.0011789 | 0.21 |
| ILMN_3235928 | CYTIP     | 0.13  | 6.50  | 3.90  | 0.000175  | 0.001179  | 0.21 |
| ILMN_1728844 | PTPRN2    | -0.14 | 6.88  | -3.90 | 0.000175  | 0.0011793 | 0.21 |
| ILMN_2369666 | CR2       | 0.78  | 7.55  | 3.90  | 0.0001751 | 0.0011798 | 0.21 |
| ILMN_2143155 | KIF11     | 0.23  | 7.10  | 3.90  | 0.0001759 | 0.0011849 | 0.21 |
| ILMN_1715024 | LSS       | -0.27 | 8.01  | -3.90 | 0.000176  | 0.001185  | 0.21 |
| ILMN_1652580 | POLD1     | -0.13 | 6.78  | -3.90 | 0.0001761 | 0.0011857 | 0.20 |
| ILMN_1739792 | RHOG      | 0.22  | 9.27  | 3.90  | 0.0001769 | 0.001191  | 0.20 |
| ILMN_3201937 | NA        | 0.19  | 7.43  | 3.90  | 0.000177  | 0.0011912 | 0.20 |
| ILMN_2382829 | PRDX2     | -0.24 | 8.72  | -3.90 | 0.0001771 | 0.0011917 | 0.20 |
| ILMN_1655563 | CTIF      | 0.13  | 6.85  | 3.90  | 0.0001774 | 0.0011935 | 0.20 |
| ILMN_1715131 | CCR7      | 0.57  | 7.45  | 3.90  | 0.0001777 | 0.001195  | 0.20 |
| ILMN_3250899 | NA        | -0.27 | 7.58  | -3.90 | 0.0001785 | 0.0012005 | 0.19 |
| ILMN_2407464 | FASTK     | -0.19 | 8.33  | -3.90 | 0.0001793 | 0.0012053 | 0.19 |
| ILMN_3241878 | RNU6ATAC  | 0.22  | 6.59  | 3.90  | 0.0001796 | 0.0012075 | 0.19 |
| ILMN_1657746 | BPHL      | -0.20 | 7.83  | -3.89 | 0.0001799 | 0.0012093 | 0.18 |
| ILMN_2237428 | SCD5      | 0.12  | 6.63  | 3.89  | 0.0001807 | 0.0012143 | 0.18 |
| ILMN_1663631 | BANP      | -0.21 | 9.70  | -3.89 | 0.000181  | 0.0012162 | 0.18 |
| ILMN_2312194 | CYB5A     | -0.30 | 8.86  | -3.89 | 0.0001818 | 0.0012208 | 0.18 |
| ILMN_1664216 | NKIRAS1   | 0.16  | 7.07  | 3.89  | 0.0001822 | 0.001223  | 0.17 |

|              |          |       |       |       |           |           |      |
|--------------|----------|-------|-------|-------|-----------|-----------|------|
| ILMN_1791508 | MMP28    | -0.19 | 6.93  | -3.89 | 0.0001822 | 0.001223  | 0.17 |
| ILMN_1787193 | CYP2S1   | -0.17 | 6.87  | -3.89 | 0.0001834 | 0.0012313 | 0.17 |
| ILMN_1679837 | SGPP1    | 0.10  | 6.50  | 3.89  | 0.0001835 | 0.0012316 | 0.17 |
| ILMN_3271218 | NA       | -0.11 | 6.71  | -3.89 | 0.0001838 | 0.0012333 | 0.16 |
| ILMN_1744138 | CHCHD7   | -0.15 | 8.22  | -3.89 | 0.0001841 | 0.0012348 | 0.16 |
| ILMN_2079803 | LSM14A   | 0.14  | 9.36  | 3.89  | 0.0001843 | 0.001236  | 0.16 |
| ILMN_1689002 | DTX1     | 0.18  | 6.60  | 3.89  | 0.0001845 | 0.0012374 | 0.16 |
| ILMN_1696127 | GLTSCR1L | -0.14 | 8.72  | -3.89 | 0.0001846 | 0.0012377 | 0.16 |
| ILMN_3241957 | D2HGDH   | -0.22 | 6.98  | -3.89 | 0.0001849 | 0.0012395 | 0.16 |
| ILMN_1705892 | SH2D1A   | 0.37  | 7.42  | 3.89  | 0.0001852 | 0.001241  | 0.16 |
| ILMN_2124064 | REL      | 0.15  | 6.67  | 3.89  | 0.0001853 | 0.0012414 | 0.16 |
| ILMN_1717262 | PROCR    | 0.23  | 7.60  | 3.89  | 0.0001854 | 0.0012422 | 0.16 |
| ILMN_2370296 | ENAH     | 0.19  | 6.87  | 3.89  | 0.000186  | 0.0012459 | 0.15 |
| ILMN_3237956 | ZC3H12C  | -0.24 | 7.98  | -3.88 | 0.0001865 | 0.0012488 | 0.15 |
| ILMN_2404065 | APP      | -0.34 | 9.92  | -3.88 | 0.0001867 | 0.0012504 | 0.15 |
| ILMN_2379520 | HAGH     | -0.14 | 6.74  | -3.88 | 0.0001869 | 0.0012509 | 0.15 |
| ILMN_1759089 | DEFA6    | 1.59  | 8.62  | 3.88  | 0.000187  | 0.0012519 | 0.15 |
| ILMN_1790309 | PINX1    | 0.13  | 6.75  | 3.88  | 0.0001871 | 0.0012521 | 0.15 |
| ILMN_1729611 | REEP4    | -0.15 | 6.85  | -3.88 | 0.0001874 | 0.0012536 | 0.15 |
| ILMN_1758337 | ZNF213   | -0.14 | 6.97  | -3.88 | 0.0001874 | 0.0012538 | 0.15 |
| ILMN_1705210 | GRASP    | -0.18 | 6.92  | -3.88 | 0.0001875 | 0.0012542 | 0.15 |
| ILMN_1667977 | TAF1B    | 0.13  | 6.91  | 3.88  | 0.0001878 | 0.0012556 | 0.14 |
| ILMN_1746846 | TTL4     | 0.11  | 6.75  | 3.88  | 0.0001881 | 0.0012572 | 0.14 |
| ILMN_2371079 | HTR3A    | 0.25  | 6.63  | 3.88  | 0.0001881 | 0.0012572 | 0.14 |
| ILMN_1739683 | LRRC6    | 0.16  | 6.66  | 3.88  | 0.0001883 | 0.0012583 | 0.14 |
| ILMN_1713406 | NA       | -0.23 | 9.56  | -3.88 | 0.000189  | 0.0012627 | 0.14 |
| ILMN_1756937 | ST8SIA4  | 0.17  | 6.81  | 3.88  | 0.0001893 | 0.0012646 | 0.14 |
| ILMN_3230160 | PCLO     | -0.12 | 6.52  | -3.88 | 0.00019   | 0.0012688 | 0.13 |
| ILMN_1716086 | WDR33    | 0.14  | 7.01  | 3.88  | 0.0001907 | 0.0012722 | 0.13 |
| ILMN_1758938 | SLC31A2  | 0.22  | 7.72  | 3.88  | 0.0001906 | 0.0012722 | 0.13 |
| ILMN_1778177 | ZNF207   | 0.16  | 9.55  | 3.88  | 0.0001906 | 0.0012722 | 0.13 |
| ILMN_1813191 | NA       | -0.26 | 7.56  | -3.88 | 0.0001906 | 0.0012722 | 0.13 |
| ILMN_3225938 | NA       | 0.11  | 13.28 | 3.88  | 0.0001905 | 0.0012722 | 0.13 |
| ILMN_1709439 | CHMP1A   | -0.22 | 8.66  | -3.88 | 0.0001913 | 0.0012759 | 0.13 |
| ILMN_2202481 | UBLCP1   | 0.21  | 8.17  | 3.88  | 0.0001914 | 0.0012766 | 0.13 |
| ILMN_1729161 | NOTCH1   | -0.21 | 8.49  | -3.88 | 0.0001915 | 0.0012769 | 0.13 |
| ILMN_1780546 | OSM      | 0.39  | 6.78  | 3.88  | 0.0001915 | 0.0012769 | 0.13 |
| ILMN_1729318 | TOR1AIP1 | 0.25  | 8.96  | 3.87  | 0.0001935 | 0.00129   | 0.12 |
| ILMN_1673649 | HYOU1    | 0.21  | 7.62  | 3.87  | 0.0001938 | 0.0012913 | 0.11 |
| ILMN_1661554 | DIAPH1   | 0.20  | 7.55  | 3.87  | 0.0001945 | 0.0012961 | 0.11 |
| ILMN_1672461 | SPPL2B   | -0.15 | 7.03  | -3.87 | 0.0001947 | 0.0012972 | 0.11 |
| ILMN_2380740 | MTO1     | 0.12  | 7.97  | 3.87  | 0.0001961 | 0.0013062 | 0.11 |
| ILMN_1700232 | FBXO30   | 0.19  | 7.78  | 3.87  | 0.0001966 | 0.0013092 | 0.11 |
| ILMN_1803925 | MTMR3    | -0.12 | 6.83  | -3.87 | 0.0001967 | 0.0013096 | 0.10 |
| ILMN_1672081 | NEURL1   | -0.13 | 6.51  | -3.87 | 0.000197  | 0.0013112 | 0.10 |
| ILMN_1704139 | DHRX     | -0.13 | 6.81  | -3.87 | 0.0001975 | 0.0013144 | 0.10 |
| ILMN_3238058 | NA       | -0.23 | 10.16 | -3.87 | 0.0001977 | 0.0013154 | 0.10 |
| ILMN_1659463 | APAF1    | -0.26 | 8.64  | -3.87 | 0.000198  | 0.0013172 | 0.10 |

|              |          |       |       |       |           |           |      |
|--------------|----------|-------|-------|-------|-----------|-----------|------|
| ILMN_2330243 | NUDT1    | 0.23  | 7.59  | 3.87  | 0.0001987 | 0.001322  | 0.09 |
| ILMN_2395652 | PTGFR    | 0.12  | 6.73  | 3.87  | 0.000199  | 0.0013233 | 0.10 |
| ILMN_2225144 | EIF4E3   | -0.20 | 8.82  | -3.87 | 0.0001992 | 0.0013247 | 0.09 |
| ILMN_1897213 | NA       | -0.11 | 6.50  | -3.87 | 0.0001994 | 0.0013257 | 0.09 |
| ILMN_2077952 | GALNT16  | 0.10  | 6.54  | 3.87  | 0.0001995 | 0.001326  | 0.09 |
| ILMN_1720526 | CENPN    | 0.23  | 7.34  | 3.86  | 0.0002    | 0.0013288 | 0.09 |
| ILMN_1804339 | CAMK1G   | 0.50  | 7.44  | 3.86  | 0.0002012 | 0.0013365 | 0.08 |
| ILMN_2145423 | DET1     | -0.12 | 7.00  | -3.86 | 0.0002014 | 0.0013376 | 0.08 |
| ILMN_1740555 | SNAP25   | 0.16  | 6.65  | 3.86  | 0.0002017 | 0.0013398 | 0.08 |
| ILMN_1710221 | GPR35    | -0.20 | 7.19  | -3.86 | 0.0002026 | 0.0013455 | 0.08 |
| ILMN_1772713 | BMS1     | 0.17  | 8.82  | 3.86  | 0.0002033 | 0.0013494 | 0.07 |
| ILMN_1735156 | SLC4A11  | 0.15  | 6.53  | 3.86  | 0.0002035 | 0.0013508 | 0.07 |
| ILMN_2257833 | BBS7     | 0.14  | 7.40  | 3.86  | 0.0002036 | 0.0013512 | 0.07 |
| ILMN_2181064 | GBA3     | -0.53 | 7.23  | -3.86 | 0.0002041 | 0.0013541 | 0.07 |
| ILMN_2192694 | EIF3M    | 0.22  | 8.63  | 3.86  | 0.0002043 | 0.001355  | 0.07 |
| ILMN_2403889 | PRMT5    | 0.13  | 7.85  | 3.86  | 0.0002046 | 0.0013571 | 0.06 |
| ILMN_1711878 | ENOPH1   | 0.20  | 8.41  | 3.86  | 0.0002048 | 0.0013583 | 0.06 |
| ILMN_1655694 | NA       | -0.13 | 7.69  | -3.86 | 0.0002052 | 0.0013606 | 0.06 |
| ILMN_1804611 | TMEM263  | 0.15  | 6.88  | 3.86  | 0.0002054 | 0.0013618 | 0.06 |
| ILMN_1804454 | FAM135A  | -0.23 | 7.88  | -3.86 | 0.0002058 | 0.0013642 | 0.06 |
| ILMN_2073758 | MMP12    | 0.95  | 8.65  | 3.86  | 0.0002062 | 0.0013662 | 0.06 |
| ILMN_2353732 | CD8A     | 0.34  | 7.42  | 3.86  | 0.0002065 | 0.001368  | 0.05 |
| ILMN_1670099 | NOSTRIN  | 0.30  | 8.75  | 3.86  | 0.0002068 | 0.0013696 | 0.05 |
| ILMN_1716766 | CEBPG    | -0.19 | 9.65  | -3.85 | 0.0002074 | 0.0013736 | 0.05 |
| ILMN_2152429 | C12orf76 | -0.13 | 7.02  | -3.85 | 0.0002075 | 0.0013736 | 0.05 |
| ILMN_1676014 | DHRS4L1  | -0.22 | 7.90  | -3.86 | 0.0002078 | 0.0013756 | 0.05 |
| ILMN_2142284 | SLC25A43 | -0.33 | 8.63  | -3.85 | 0.0002084 | 0.0013793 | 0.05 |
| ILMN_1792242 | C8orf44  | -0.12 | 6.76  | -3.85 | 0.0002091 | 0.0013835 | 0.04 |
| ILMN_1815024 | PRDX5    | -0.36 | 10.24 | -3.85 | 0.0002092 | 0.0013842 | 0.04 |
| ILMN_1716272 | KBTBD8   | 0.30  | 7.31  | 3.85  | 0.0002097 | 0.001387  | 0.04 |
| ILMN_1670130 | ARID3A   | 0.24  | 7.56  | 3.85  | 0.0002098 | 0.0013877 | 0.04 |
| ILMN_1747197 | SLC41A2  | -0.16 | 7.27  | -3.85 | 0.0002105 | 0.0013918 | 0.04 |
| ILMN_1712026 | NLRP3    | 0.27  | 6.85  | 3.85  | 0.0002108 | 0.0013935 | 0.04 |
| ILMN_1742379 | IFT122   | -0.14 | 7.25  | -3.85 | 0.0002124 | 0.0014041 | 0.03 |
| ILMN_2062112 | ZC3H15   | 0.21  | 8.40  | 3.85  | 0.000213  | 0.0014073 | 0.03 |
| ILMN_1788184 | CIDEA    | 0.20  | 6.59  | 3.85  | 0.0002131 | 0.0014081 | 0.03 |
| ILMN_1764177 | JARID2   | 0.20  | 7.72  | 3.85  | 0.0002133 | 0.0014089 | 0.02 |
| ILMN_2403965 | NA       | 0.57  | 8.37  | 3.85  | 0.000214  | 0.0014135 | 0.02 |
| ILMN_1709741 | NA       | -0.14 | 6.74  | -3.85 | 0.0002147 | 0.0014181 | 0.02 |
| ILMN_2375156 | PHF7     | -0.13 | 6.72  | -3.84 | 0.000215  | 0.0014193 | 0.02 |
| ILMN_1711049 | CACNA2D2 | -0.13 | 6.74  | -3.84 | 0.0002154 | 0.0014221 | 0.01 |
| ILMN_1794912 | ATP5H    | -0.16 | 11.85 | -3.84 | 0.000216  | 0.0014258 | 0.01 |
| ILMN_1712505 | KDELC1   | 0.10  | 6.56  | 3.84  | 0.0002161 | 0.0014262 | 0.01 |
| ILMN_1775743 | BTG1     | 0.20  | 11.58 | 3.84  | 0.0002164 | 0.0014275 | 0.01 |
| ILMN_2171289 | SAMSN1   | 0.18  | 6.64  | 3.84  | 0.0002165 | 0.0014277 | 0.01 |
| ILMN_1674308 | EP400NL  | 0.09  | 6.55  | 3.84  | 0.0002168 | 0.0014296 | 0.02 |
| ILMN_1711838 | SLC25A24 | 0.27  | 6.76  | 3.84  | 0.0002169 | 0.0014301 | 0.02 |
| ILMN_1685275 | MCAM     | 0.10  | 6.44  | 3.84  | 0.0002173 | 0.0014321 | 0.01 |

|              |           |       |       |       |           |           |       |
|--------------|-----------|-------|-------|-------|-----------|-----------|-------|
| ILMN_1661833 | ANKRD12   | -0.19 | 8.53  | -3.84 | 0.0002174 | 0.0014326 | 0.01  |
| ILMN_2387214 | PALM      | 0.11  | 6.52  | 3.84  | 0.0002182 | 0.0014379 | 0.01  |
| ILMN_1808919 | HPS4      | -0.10 | 6.89  | -3.84 | 0.0002189 | 0.0014421 | 0.00  |
| ILMN_1707807 | RNF128    | -0.14 | 6.67  | -3.84 | 0.0002192 | 0.0014441 | 0.00  |
| ILMN_1705814 | KRT80     | 0.24  | 6.58  | 3.84  | 0.0002194 | 0.0014452 | 0.00  |
| ILMN_1762825 | CANX      | 0.25  | 8.04  | 3.84  | 0.0002203 | 0.0014506 | -0.01 |
| ILMN_1834233 | NA        | -0.12 | 6.56  | -3.84 | 0.0002209 | 0.0014545 | -0.01 |
| ILMN_1761262 | MPI       | -0.12 | 6.73  | -3.84 | 0.000221  | 0.0014546 | -0.01 |
| ILMN_3302356 | RPS14     | -0.16 | 7.07  | -3.84 | 0.0002215 | 0.0014575 | -0.01 |
| ILMN_1658486 | MRPL54    | -0.24 | 9.10  | -3.84 | 0.0002218 | 0.0014591 | -0.01 |
| ILMN_3247753 | C2orf70   | 0.16  | 6.65  | 3.84  | 0.0002218 | 0.0014591 | -0.01 |
| ILMN_1654541 | ATP6V1G2  | 0.10  | 6.52  | 3.83  | 0.0002222 | 0.0014614 | -0.01 |
| ILMN_1749848 | SLC35F1   | 0.12  | 6.77  | 3.83  | 0.0002224 | 0.0014625 | -0.02 |
| ILMN_1666364 | COQ10A    | 0.17  | 7.16  | 3.84  | 0.0002225 | 0.0014629 | -0.01 |
| ILMN_3188099 | SRRM1     | 0.15  | 7.31  | 3.83  | 0.0002226 | 0.0014634 | -0.02 |
| ILMN_1790014 | METRNL    | -0.18 | 7.07  | -3.83 | 0.0002232 | 0.0014667 | -0.02 |
| ILMN_2393573 | RASSF1    | 0.15  | 6.87  | 3.83  | 0.0002248 | 0.0014771 | -0.03 |
| ILMN_3256958 | NA        | -0.11 | 6.57  | -3.83 | 0.0002249 | 0.0014774 | -0.02 |
| ILMN_1683023 | PDGFC     | 0.21  | 7.28  | 3.83  | 0.0002253 | 0.0014798 | -0.03 |
| ILMN_1719165 | BRMS1     | -0.14 | 6.99  | -3.83 | 0.0002258 | 0.0014831 | -0.03 |
| ILMN_3241522 | ASS1      | -0.27 | 7.71  | -3.83 | 0.0002263 | 0.0014857 | -0.03 |
| ILMN_1754249 | NA        | 0.17  | 6.65  | 3.83  | 0.0002274 | 0.0014929 | -0.04 |
| ILMN_2043109 | TOP1P2    | 0.18  | 7.25  | 3.83  | 0.0002275 | 0.0014932 | -0.03 |
| ILMN_1726624 | YPEL4     | 0.11  | 6.37  | 3.83  | 0.0002276 | 0.0014937 | -0.04 |
| ILMN_2336647 | NNT       | -0.17 | 7.51  | -3.83 | 0.0002279 | 0.001495  | -0.04 |
| ILMN_1658373 | PAN2      | -0.18 | 7.96  | -3.83 | 0.0002287 | 0.0015002 | -0.04 |
| ILMN_1698419 | NCOR2     | 0.18  | 8.09  | 3.83  | 0.000229  | 0.0015015 | -0.04 |
| ILMN_1735735 | KATNB1    | -0.13 | 7.33  | -3.83 | 0.000229  | 0.0015015 | -0.04 |
| ILMN_1737992 | CRAT      | -0.17 | 7.10  | -3.83 | 0.000229  | 0.0015015 | -0.04 |
| ILMN_2406552 | PIDD1     | -0.14 | 6.87  | -3.83 | 0.0002294 | 0.0015039 | -0.04 |
| ILMN_1652787 | PIK3AP1   | 0.24  | 7.18  | 3.83  | 0.0002298 | 0.0015055 | -0.05 |
| ILMN_1730791 | MLLT4-AS1 | -0.12 | 6.77  | -3.83 | 0.0002298 | 0.0015055 | -0.05 |
| ILMN_2400326 | DYRK3     | 0.12  | 6.61  | 3.83  | 0.0002298 | 0.0015055 | -0.05 |
| ILMN_1655046 | NUTF2     | 0.15  | 7.66  | 3.82  | 0.0002307 | 0.0015109 | -0.05 |
| ILMN_1669033 | NCOA1     | -0.20 | 8.54  | -3.82 | 0.0002309 | 0.0015117 | -0.05 |
| ILMN_1706645 | MB21D1    | 0.10  | 6.43  | 3.82  | 0.0002319 | 0.0015181 | -0.05 |
| ILMN_1781986 | UQCR10    | -0.18 | 7.75  | -3.82 | 0.0002319 | 0.0015181 | -0.05 |
| ILMN_1685774 | ATP5C1    | -0.19 | 11.43 | -3.82 | 0.000232  | 0.0015186 | -0.05 |
| ILMN_2058347 | NT5DC1    | -0.09 | 6.50  | -3.82 | 0.0002322 | 0.0015194 | -0.06 |
| ILMN_1761961 | MCUR1     | -0.16 | 8.25  | -3.82 | 0.0002323 | 0.0015197 | -0.05 |
| ILMN_1724581 | EDC3      | -0.10 | 6.78  | -3.82 | 0.0002331 | 0.0015246 | -0.06 |
| ILMN_1663976 | PDLIM4    | 0.14  | 6.35  | 3.82  | 0.0002333 | 0.0015254 | -0.06 |
| ILMN_1836469 | NA        | 0.13  | 7.19  | 3.82  | 0.0002333 | 0.0015254 | -0.06 |
| ILMN_2204297 | AP5M1     | -0.19 | 8.26  | -3.82 | 0.0002336 | 0.0015266 | -0.06 |
| ILMN_3309349 | SNHG8     | 0.44  | 8.22  | 3.82  | 0.0002336 | 0.0015266 | -0.06 |
| ILMN_2414165 | PRDM1     | 0.15  | 6.65  | 3.82  | 0.0002336 | 0.0015267 | -0.06 |
| ILMN_2385566 | PHYH      | -0.15 | 6.94  | -3.82 | 0.0002342 | 0.0015298 | -0.06 |
| ILMN_1792305 | ZNF318    | 0.15  | 8.07  | 3.82  | 0.0002349 | 0.0015341 | -0.07 |

|              |            |       |      |       |           |           |       |
|--------------|------------|-------|------|-------|-----------|-----------|-------|
| ILMN_1762308 | SNX29      | 0.21  | 7.05 | 3.82  | 0.0002352 | 0.0015361 | -0.07 |
| ILMN_1678998 | LRRC14     | -0.16 | 7.77 | -3.82 | 0.0002357 | 0.0015391 | -0.07 |
| ILMN_1702592 | WDR73      | -0.15 | 7.30 | -3.82 | 0.000236  | 0.0015408 | -0.07 |
| ILMN_1700159 | NIPSNAP3A  | -0.20 | 7.40 | -3.82 | 0.0002378 | 0.0015524 | -0.08 |
| ILMN_2374249 | DYRK2      | -0.21 | 8.35 | -3.81 | 0.0002386 | 0.0015569 | -0.08 |
| ILMN_1765082 | RBM10      | -0.15 | 7.26 | -3.81 | 0.0002395 | 0.0015629 | -0.08 |
| ILMN_1836776 | MPRIP      | 0.15  | 7.16 | 3.81  | 0.0002405 | 0.0015688 | -0.09 |
| ILMN_1729212 | GRM8       | -0.18 | 6.78 | -3.81 | 0.0002412 | 0.0015729 | -0.09 |
| ILMN_1747968 | RBM33      | -0.16 | 8.84 | -3.81 | 0.0002417 | 0.0015761 | -0.09 |
| ILMN_1719792 | PHLDB2     | 0.22  | 6.88 | 3.81  | 0.0002422 | 0.0015793 | -0.10 |
| ILMN_1807969 | SNCAIP     | 0.18  | 7.03 | 3.81  | 0.0002428 | 0.0015827 | -0.10 |
| ILMN_1823231 | LOC1005055 | 0.14  | 6.91 | 3.81  | 0.0002428 | 0.0015827 | -0.10 |
| ILMN_1748904 | WTAP       | 0.18  | 7.87 | 3.81  | 0.0002429 | 0.0015827 | -0.10 |
| ILMN_1756091 | NA         | 0.19  | 6.68 | 3.81  | 0.0002436 | 0.0015871 | -0.10 |
| ILMN_1802167 | ALDH1L1    | 0.43  | 7.23 | 3.81  | 0.0002438 | 0.0015877 | -0.10 |
| ILMN_2221673 | ASNSD1     | 0.19  | 8.98 | 3.81  | 0.000244  | 0.0015892 | -0.10 |
| ILMN_2085236 | SNX24      | -0.13 | 6.82 | -3.81 | 0.0002445 | 0.0015917 | -0.10 |
| ILMN_1688070 | NA         | -0.24 | 7.64 | -3.81 | 0.0002452 | 0.0015959 | -0.11 |
| ILMN_3180989 | DSTYK      | 0.12  | 6.89 | 3.81  | 0.0002453 | 0.0015964 | -0.11 |
| ILMN_1798654 | MCM6       | 0.31  | 9.08 | 3.81  | 0.0002461 | 0.0016012 | -0.11 |
| ILMN_2280189 | NA         | -0.15 | 7.29 | -3.81 | 0.0002463 | 0.0016023 | -0.11 |
| ILMN_1652331 | NA         | -0.18 | 7.09 | -3.81 | 0.0002465 | 0.0016029 | -0.11 |
| ILMN_1704236 | MAX        | -0.11 | 6.73 | -3.81 | 0.0002465 | 0.0016029 | -0.11 |
| ILMN_1780698 | ZFYVE19    | -0.16 | 7.56 | -3.81 | 0.0002464 | 0.0016029 | -0.11 |
| ILMN_1745887 | FBXO21     | 0.16  | 9.32 | 3.81  | 0.0002468 | 0.0016039 | -0.11 |
| ILMN_1802942 | NA         | -0.11 | 6.69 | -3.81 | 0.0002467 | 0.0016039 | -0.11 |
| ILMN_1811877 | ANTXR1     | 0.12  | 6.70 | 3.81  | 0.0002468 | 0.0016039 | -0.11 |
| ILMN_1651735 | TGOLN2     | -0.17 | 9.80 | -3.80 | 0.0002474 | 0.0016072 | -0.12 |
| ILMN_1700955 | TCTEX1D2   | 0.19  | 7.36 | 3.81  | 0.0002474 | 0.0016072 | -0.11 |
| ILMN_2373831 | BTN3A3     | 0.17  | 7.03 | 3.80  | 0.0002476 | 0.001608  | -0.12 |
| ILMN_1685856 | FAM92A1    | 0.15  | 6.65 | 3.80  | 0.0002479 | 0.0016095 | -0.12 |
| ILMN_1771393 | TCAIM      | -0.13 | 6.50 | -3.80 | 0.0002483 | 0.0016123 | -0.12 |
| ILMN_1786718 | NDUFV1     | -0.26 | 9.56 | -3.80 | 0.0002484 | 0.0016125 | -0.12 |
| ILMN_1797974 | AIG1       | 0.14  | 7.44 | 3.80  | 0.0002485 | 0.0016128 | -0.12 |
| ILMN_1722218 | MBOAT7     | -0.22 | 8.09 | -3.80 | 0.0002494 | 0.0016184 | -0.12 |
| ILMN_2393712 | CTTN       | -0.21 | 9.41 | -3.80 | 0.00025   | 0.001622  | -0.12 |
| ILMN_2096784 | TFAP2C     | 0.23  | 6.67 | 3.80  | 0.0002502 | 0.0016229 | -0.12 |
| ILMN_1758633 | CCDC130    | -0.17 | 9.59 | -3.80 | 0.000251  | 0.0016277 | -0.13 |
| ILMN_2395711 | ARRB2      | 0.13  | 6.63 | 3.80  | 0.000251  | 0.0016277 | -0.12 |
| ILMN_1755303 | ZNF217     | -0.20 | 7.90 | -3.80 | 0.0002512 | 0.0016288 | -0.13 |
| ILMN_2198893 | LOC407835  | -0.19 | 8.21 | -3.80 | 0.0002515 | 0.0016299 | -0.13 |
| ILMN_1789702 | GBE1       | 0.17  | 7.59 | 3.80  | 0.000252  | 0.0016334 | -0.13 |
| ILMN_2367681 | SPAG1      | -0.27 | 7.73 | -3.80 | 0.0002527 | 0.0016375 | -0.14 |
| ILMN_2225537 | PTGR1      | -0.31 | 8.36 | -3.80 | 0.0002528 | 0.0016377 | -0.14 |
| ILMN_2334121 | PRKDC      | 0.10  | 6.73 | 3.80  | 0.000253  | 0.0016387 | -0.14 |
| ILMN_1741881 | C9orf72    | 0.19  | 7.32 | 3.80  | 0.0002537 | 0.0016426 | -0.13 |
| ILMN_1727332 | ATPIF1     | -0.22 | 9.40 | -3.80 | 0.0002537 | 0.0016428 | -0.14 |
| ILMN_1702265 | HDHD2      | -0.17 | 8.84 | -3.80 | 0.0002544 | 0.0016465 | -0.14 |

|              |            |       |       |       |           |           |       |
|--------------|------------|-------|-------|-------|-----------|-----------|-------|
| ILMN_2187718 | COX17      | -0.14 | 10.70 | -3.80 | 0.0002545 | 0.0016474 | -0.14 |
| ILMN_1669390 | PPP1R13L   | 0.15  | 7.03  | 3.80  | 0.000255  | 0.0016499 | -0.14 |
| ILMN_1679809 | GSTP1      | 0.24  | 11.14 | 3.80  | 0.000255  | 0.0016499 | -0.14 |
| ILMN_2182704 | BIRC2      | -0.17 | 9.49  | -3.80 | 0.0002556 | 0.0016532 | -0.15 |
| ILMN_1736577 | ZNF688     | -0.13 | 6.93  | -3.79 | 0.0002566 | 0.0016596 | -0.15 |
| ILMN_1767837 | GOLT1B     | 0.18  | 7.56  | 3.79  | 0.0002584 | 0.0016708 | -0.16 |
| ILMN_1671971 | KRT8       | -0.43 | 11.73 | -3.79 | 0.0002591 | 0.0016747 | -0.16 |
| ILMN_2384536 | ECI2       | -0.24 | 8.13  | -3.79 | 0.0002595 | 0.0016775 | -0.16 |
| ILMN_2396410 | CS         | -0.20 | 8.13  | -3.79 | 0.0002605 | 0.0016834 | -0.16 |
| ILMN_1730848 | KRT18      | -0.10 | 6.64  | -3.79 | 0.0002612 | 0.0016875 | -0.16 |
| ILMN_1652137 | NPY4R      | -0.10 | 6.38  | -3.79 | 0.0002615 | 0.0016891 | -0.17 |
| ILMN_1763228 | MEF2D      | -0.16 | 8.46  | -3.79 | 0.0002624 | 0.0016946 | -0.17 |
| ILMN_1653828 | CHFR       | -0.21 | 8.84  | -3.79 | 0.0002628 | 0.001697  | -0.17 |
| ILMN_1705769 | IL7        | -0.13 | 6.91  | -3.79 | 0.000263  | 0.0016978 | -0.17 |
| ILMN_1786697 | TRIM9      | 0.10  | 6.49  | 3.79  | 0.0002631 | 0.0016978 | -0.17 |
| ILMN_2253145 | NEK3       | -0.10 | 6.42  | -3.79 | 0.0002631 | 0.0016978 | -0.17 |
| ILMN_3210914 | LOC344887  | -0.20 | 6.78  | -3.79 | 0.0002631 | 0.0016978 | -0.17 |
| ILMN_1713803 | C17orf97   | -0.28 | 6.94  | -3.79 | 0.0002641 | 0.0017035 | -0.18 |
| ILMN_2046003 | ZDHC6      | -0.16 | 9.37  | -3.79 | 0.0002647 | 0.0017076 | -0.18 |
| ILMN_1703324 | PDSS1      | -0.21 | 7.78  | -3.78 | 0.0002658 | 0.001714  | -0.18 |
| ILMN_1655983 | CDC14A     | -0.11 | 6.61  | -3.79 | 0.0002659 | 0.0017144 | -0.18 |
| ILMN_1815734 | FCHSD2     | 0.21  | 7.25  | 3.78  | 0.0002663 | 0.0017166 | -0.18 |
| ILMN_1778360 | PYGB       | -0.30 | 9.79  | -3.78 | 0.0002665 | 0.0017179 | -0.18 |
| ILMN_1712431 | PCED1B     | 0.36  | 7.54  | 3.78  | 0.0002667 | 0.0017189 | -0.19 |
| ILMN_1724437 | GCAT       | -0.15 | 7.12  | -3.78 | 0.0002672 | 0.0017215 | -0.19 |
| ILMN_1744147 | CEBPZ      | 0.16  | 9.33  | 3.78  | 0.0002672 | 0.0017215 | -0.19 |
| ILMN_1675453 | HHIP       | 0.15  | 6.75  | 3.78  | 0.0002675 | 0.001723  | -0.19 |
| ILMN_1788547 | GCLM       | 0.17  | 7.31  | 3.78  | 0.0002676 | 0.001723  | -0.19 |
| ILMN_1665982 | AKTIP      | -0.14 | 7.34  | -3.78 | 0.0002687 | 0.0017299 | -0.19 |
| ILMN_3178273 | LOC1001308 | -0.11 | 6.77  | -3.78 | 0.0002693 | 0.0017333 | -0.19 |
| ILMN_2080611 | PDSS1      | -0.27 | 8.37  | -3.78 | 0.0002694 | 0.0017335 | -0.20 |
| ILMN_1729987 | SRC        | -0.20 | 8.94  | -3.78 | 0.0002696 | 0.001735  | -0.20 |
| ILMN_2175712 | NDUFA11    | -0.19 | 9.50  | -3.78 | 0.0002703 | 0.0017387 | -0.20 |
| ILMN_1697409 | TNFRSF14   | -0.20 | 10.79 | -3.78 | 0.0002705 | 0.0017396 | -0.20 |
| ILMN_2172174 | PNP        | 0.31  | 8.39  | 3.78  | 0.0002705 | 0.0017396 | -0.20 |
| ILMN_1700733 | FAM214A    | -0.22 | 8.52  | -3.78 | 0.0002707 | 0.0017402 | -0.20 |
| ILMN_1708728 | H2AFJ      | -0.28 | 9.64  | -3.78 | 0.0002711 | 0.0017429 | -0.20 |
| ILMN_1703538 | AIF1       | 0.45  | 8.03  | 3.78  | 0.0002714 | 0.0017442 | -0.20 |
| ILMN_1710495 | PAPLN      | 0.34  | 7.60  | 3.78  | 0.0002716 | 0.0017452 | -0.19 |
| ILMN_1713603 | PRKCB      | 0.14  | 6.46  | 3.78  | 0.0002719 | 0.0017469 | -0.20 |
| ILMN_1662852 | IQCK       | -0.15 | 7.43  | -3.78 | 0.0002726 | 0.0017509 | -0.21 |
| ILMN_3247723 | NOP16      | 0.18  | 7.33  | 3.78  | 0.0002729 | 0.001753  | -0.21 |
| ILMN_1755811 | FBXO4      | 0.13  | 6.74  | 3.78  | 0.0002731 | 0.0017536 | -0.21 |
| ILMN_1725414 | ABCC6      | -0.09 | 6.45  | -3.78 | 0.0002736 | 0.0017565 | -0.21 |
| ILMN_1796497 | IPCEF1     | 0.16  | 6.90  | 3.78  | 0.0002738 | 0.0017573 | -0.21 |
| ILMN_2203463 | SPATS2     | 0.15  | 7.41  | 3.77  | 0.0002744 | 0.0017613 | -0.21 |
| ILMN_1737586 | EIF4H      | -0.24 | 8.02  | -3.77 | 0.0002747 | 0.0017628 | -0.21 |
| ILMN_1754158 | NA         | -0.16 | 6.58  | -3.77 | 0.000275  | 0.0017644 | -0.21 |



|              |          |       |       |       |           |           |       |
|--------------|----------|-------|-------|-------|-----------|-----------|-------|
| ILMN_1775441 | ARHGAP24 | 0.11  | 6.51  | 3.77  | 0.0002755 | 0.0017669 | -0.22 |
| ILMN_1815203 | HMGCS2   | -0.80 | 11.33 | -3.77 | 0.000276  | 0.00177   | -0.22 |
| ILMN_1724811 | PARN     | 0.13  | 7.72  | 3.77  | 0.0002762 | 0.0017712 | -0.22 |
| ILMN_1673604 | YIPF3    | -0.19 | 9.14  | -3.77 | 0.0002765 | 0.0017726 | -0.22 |
| ILMN_1738529 | BCS1L    | -0.13 | 7.44  | -3.77 | 0.0002766 | 0.0017726 | -0.22 |
| ILMN_1813386 | CORO6    | 0.11  | 6.52  | 3.77  | 0.0002775 | 0.0017781 | -0.22 |
| ILMN_1706149 | PDCD2L   | 0.14  | 6.91  | 3.77  | 0.0002776 | 0.0017787 | -0.22 |
| ILMN_1775944 | ABI2     | 0.09  | 6.50  | 3.77  | 0.0002783 | 0.0017829 | -0.23 |
| ILMN_1662848 | TXNDC15  | 0.16  | 7.30  | 3.77  | 0.0002799 | 0.0017925 | -0.22 |
| ILMN_3236481 | HIGD1A   | -0.47 | 10.83 | -3.77 | 0.0002832 | 0.0018134 | -0.24 |
| ILMN_1804337 | NA       | -0.13 | 6.62  | -3.77 | 0.000284  | 0.001818  | -0.24 |
| ILMN_1752947 | COPRS    | 0.18  | 8.17  | 3.76  | 0.0002843 | 0.00182   | -0.25 |
| ILMN_2373632 | IDH3B    | -0.18 | 9.02  | -3.77 | 0.0002848 | 0.0018227 | -0.24 |
| ILMN_1731181 | TEX2     | -0.16 | 8.68  | -3.76 | 0.0002857 | 0.0018273 | -0.25 |
| ILMN_1761733 | HLA-DMB  | 0.53  | 10.22 | 3.76  | 0.0002857 | 0.0018273 | -0.25 |
| ILMN_1784655 | TLCD1    | -0.14 | 6.69  | -3.76 | 0.0002856 | 0.0018273 | -0.25 |
| ILMN_1767193 | CR1      | 0.10  | 6.28  | 3.76  | 0.0002859 | 0.0018283 | -0.25 |
| ILMN_1770412 | AHCYL1   | 0.16  | 9.45  | 3.76  | 0.0002859 | 0.0018283 | -0.25 |
| ILMN_1654118 | BCL2L1   | 0.20  | 9.76  | 3.76  | 0.000286  | 0.0018283 | -0.25 |
| ILMN_1729816 | VDAC3    | -0.14 | 11.03 | -3.76 | 0.0002864 | 0.0018302 | -0.25 |
| ILMN_2357155 | TPO      | 0.08  | 6.32  | 3.76  | 0.0002864 | 0.0018302 | -0.25 |
| ILMN_1773427 | KANK1    | 0.21  | 8.26  | 3.76  | 0.0002874 | 0.0018365 | -0.26 |
| ILMN_1792276 | NA       | -0.14 | 6.88  | -3.76 | 0.0002877 | 0.0018376 | -0.26 |
| ILMN_2311518 | TROVE2   | 0.15  | 9.42  | 3.76  | 0.0002892 | 0.0018469 | -0.26 |
| ILMN_2285112 | FBXO11   | 0.15  | 10.05 | 3.76  | 0.0002893 | 0.0018471 | -0.26 |
| ILMN_2373566 | PJA1     | 0.14  | 6.86  | 3.76  | 0.0002893 | 0.0018471 | -0.26 |
| ILMN_1803862 | LCN15    | -0.31 | 6.72  | -3.76 | 0.0002902 | 0.0018523 | -0.27 |
| ILMN_2409754 | PRR5     | -0.17 | 7.19  | -3.76 | 0.0002912 | 0.0018585 | -0.27 |
| ILMN_1657058 | PPIL6    | 0.11  | 6.41  | 3.76  | 0.0002915 | 0.0018603 | -0.27 |
| ILMN_1799815 | XYLT2    | -0.22 | 8.60  | -3.76 | 0.0002917 | 0.0018609 | -0.27 |
| ILMN_1717173 | ECT2     | 0.25  | 8.08  | 3.76  | 0.0002918 | 0.0018612 | -0.27 |
| ILMN_2263144 | TMEM223  | -0.13 | 6.98  | -3.76 | 0.0002918 | 0.0018612 | -0.27 |
| ILMN_1714216 | TSC2     | -0.14 | 7.27  | -3.76 | 0.0002925 | 0.0018649 | -0.27 |
| ILMN_1658283 | NA       | 0.17  | 12.50 | 3.76  | 0.0002931 | 0.001868  | -0.27 |
| ILMN_1701882 | NA       | 0.12  | 6.66  | 3.76  | 0.000293  | 0.001868  | -0.27 |
| ILMN_1663722 | DNAJB5   | 0.11  | 6.51  | 3.76  | 0.0002933 | 0.001869  | -0.28 |
| ILMN_1714228 | SPTBN1   | 0.11  | 6.54  | 3.76  | 0.0002933 | 0.001869  | -0.28 |
| ILMN_1717219 | FAM220A  | 0.12  | 8.00  | 3.76  | 0.0002934 | 0.0018692 | -0.28 |
| ILMN_1728071 | KRAS     | -0.19 | 8.07  | -3.75 | 0.0002942 | 0.0018736 | -0.28 |
| ILMN_1728983 | NR2C1    | 0.13  | 7.37  | 3.75  | 0.0002947 | 0.0018766 | -0.28 |
| ILMN_2228809 | YWHAG    | 0.16  | 9.00  | 3.76  | 0.0002949 | 0.0018772 | -0.27 |
| ILMN_3260345 | AGFG1    | 0.16  | 7.34  | 3.75  | 0.0002949 | 0.0018772 | -0.28 |
| ILMN_1736939 | UGCG     | 0.27  | 8.40  | 3.75  | 0.0002952 | 0.0018785 | -0.28 |
| ILMN_1734878 | CD79A    | 0.84  | 9.05  | 3.75  | 0.0002957 | 0.0018814 | -0.28 |
| ILMN_1701386 | STRADB   | -0.32 | 8.61  | -3.75 | 0.0002966 | 0.0018872 | -0.29 |
| ILMN_1740500 | TSPYL4   | 0.10  | 6.58  | 3.75  | 0.0002968 | 0.0018879 | -0.29 |
| ILMN_1777660 | RNF144A  | -0.25 | 8.33  | -3.75 | 0.0002969 | 0.001888  | -0.29 |
| ILMN_1810716 | GFRA3    | 0.14  | 6.63  | 3.75  | 0.000297  | 0.0018883 | -0.29 |

|              |           |       |       |       |           |           |       |
|--------------|-----------|-------|-------|-------|-----------|-----------|-------|
| ILMN_2389445 | ARHGEF10L | -0.14 | 6.74  | -3.75 | 0.0002989 | 0.0019003 | -0.29 |
| ILMN_2399036 | SEPN1     | 0.14  | 7.42  | 3.75  | 0.0002994 | 0.001903  | -0.29 |
| ILMN_1762103 | WDR48     | -0.19 | 8.08  | -3.75 | 0.0002995 | 0.0019034 | -0.29 |
| ILMN_1723048 | GJC2      | 0.12  | 6.77  | 3.75  | 0.0002997 | 0.0019044 | -0.30 |
| ILMN_1744713 | PARK7     | 0.17  | 10.60 | 3.75  | 0.0003002 | 0.0019069 | -0.30 |
| ILMN_1794132 | NDUFS8    | -0.19 | 10.70 | -3.75 | 0.0003002 | 0.0019069 | -0.30 |
| ILMN_1664122 | PTPN6     | -0.10 | 6.46  | -3.75 | 0.0003005 | 0.0019081 | -0.30 |
| ILMN_1687353 | NA        | -0.10 | 6.54  | -3.75 | 0.0003013 | 0.0019129 | -0.30 |
| ILMN_2362477 | TRIM31    | -0.35 | 7.43  | -3.75 | 0.0003015 | 0.0019141 | -0.30 |
| ILMN_1735231 | ZSWIM4    | -0.12 | 6.86  | -3.75 | 0.0003017 | 0.0019147 | -0.30 |
| ILMN_1680805 | IFNLR1    | -0.15 | 6.88  | -3.75 | 0.0003028 | 0.0019212 | -0.30 |
| ILMN_2394523 | TMEM231   | -0.13 | 6.75  | -3.75 | 0.0003028 | 0.0019212 | -0.31 |
| ILMN_1706357 | RFX2      | 0.13  | 6.48  | 3.75  | 0.0003029 | 0.0019213 | -0.31 |
| ILMN_2389054 | CLDN18    | 0.20  | 6.58  | 3.75  | 0.0003034 | 0.0019243 | -0.31 |
| ILMN_1673769 | KCNG1     | -0.15 | 6.65  | -3.75 | 0.0003036 | 0.0019254 | -0.31 |
| ILMN_1688753 | PTDSS1    | 0.18  | 8.90  | 3.75  | 0.0003039 | 0.0019264 | -0.31 |
| ILMN_1750075 | DMTF1     | -0.15 | 8.61  | -3.75 | 0.0003042 | 0.0019283 | -0.31 |
| ILMN_1764166 | BCKDHB    | -0.16 | 7.53  | -3.74 | 0.0003051 | 0.0019339 | -0.31 |
| ILMN_3225591 | RPL14     | 0.22  | 10.60 | 3.74  | 0.0003055 | 0.0019355 | -0.31 |
| ILMN_2067370 | SNRPF     | 0.21  | 10.23 | 3.74  | 0.0003058 | 0.001937  | -0.31 |
| ILMN_2122953 | CISD1     | -0.17 | 10.16 | -3.74 | 0.0003065 | 0.0019411 | -0.32 |
| ILMN_2383455 | SUOX      | -0.15 | 7.16  | -3.74 | 0.0003068 | 0.0019428 | -0.32 |
| ILMN_2184049 | COX7B     | -0.18 | 10.52 | -3.74 | 0.0003069 | 0.0019429 | -0.32 |
| ILMN_2414135 | PLP1      | 0.13  | 6.63  | 3.74  | 0.0003074 | 0.0019459 | -0.32 |
| ILMN_2158594 | R3HCC1L   | -0.15 | 7.16  | -3.74 | 0.000308  | 0.0019493 | -0.32 |
| ILMN_2398274 | PYCARD    | -0.13 | 6.95  | -3.74 | 0.000308  | 0.0019493 | -0.32 |
| ILMN_1740586 | PLA2G2A   | 0.76  | 9.81  | 3.74  | 0.0003083 | 0.0019508 | -0.32 |
| ILMN_1667551 | NA        | -0.19 | 8.85  | -3.74 | 0.0003097 | 0.0019593 | -0.33 |
| ILMN_1731720 | PDRG1     | -0.12 | 7.24  | -3.74 | 0.00031   | 0.0019607 | -0.33 |
| ILMN_2119945 | NDUFB3    | -0.17 | 11.15 | -3.74 | 0.000311  | 0.0019664 | -0.33 |
| ILMN_1703697 | LANCL1    | 0.22  | 8.79  | 3.74  | 0.0003116 | 0.0019697 | -0.33 |
| ILMN_1725981 | HNRNPA3   | 0.15  | 6.97  | 3.74  | 0.0003124 | 0.0019746 | -0.33 |
| ILMN_1759012 | PPP1R1B   | -0.13 | 6.89  | -3.74 | 0.0003124 | 0.0019746 | -0.33 |
| ILMN_1748109 | PEX1      | -0.16 | 7.36  | -3.74 | 0.0003131 | 0.0019783 | -0.34 |
| ILMN_1802404 | ABCC1     | 0.13  | 6.68  | 3.74  | 0.0003134 | 0.0019798 | -0.34 |
| ILMN_2082489 | PRMT7     | -0.11 | 6.62  | -3.74 | 0.0003135 | 0.0019802 | -0.34 |
| ILMN_1695311 | HLA-DMA   | 0.52  | 10.07 | 3.74  | 0.0003139 | 0.0019825 | -0.34 |
| ILMN_1785574 | HTRA2     | 0.13  | 7.10  | 3.74  | 0.0003144 | 0.0019852 | -0.34 |
| ILMN_2174380 | KIAA1804  | -0.14 | 6.68  | -3.73 | 0.0003161 | 0.0019957 | -0.35 |
| ILMN_1739751 | SLC26A11  | 0.11  | 6.69  | 3.73  | 0.0003163 | 0.0019962 | -0.35 |
| ILMN_1710315 | NOS1AP    | -0.11 | 6.59  | -3.73 | 0.0003168 | 0.0019991 | -0.35 |
| ILMN_1755737 | TRABD     | 0.20  | 10.26 | 3.73  | 0.0003178 | 0.0020051 | -0.35 |
| ILMN_3236945 | PTPMT1    | 0.13  | 8.30  | 3.73  | 0.0003187 | 0.0020104 | -0.35 |
| ILMN_2060770 | RAI1      | 0.14  | 7.50  | 3.73  | 0.0003189 | 0.0020113 | -0.35 |
| ILMN_2362581 | FNDC3A    | 0.20  | 7.76  | 3.73  | 0.0003196 | 0.0020157 | -0.36 |
| ILMN_1709233 | F5        | 0.11  | 6.54  | 3.73  | 0.0003199 | 0.0020168 | -0.36 |
| ILMN_2332691 | CAPN3     | -0.16 | 6.90  | -3.73 | 0.0003208 | 0.0020222 | -0.36 |
| ILMN_1779257 | CD40      | 0.15  | 6.71  | 3.73  | 0.0003214 | 0.002026  | -0.35 |

|              |            |       |       |       |           |           |       |
|--------------|------------|-------|-------|-------|-----------|-----------|-------|
| ILMN_1691112 | PIGN       | -0.23 | 8.41  | -3.73 | 0.0003219 | 0.0020285 | -0.36 |
| ILMN_3230337 | PAXIP1-AS2 | -0.13 | 7.07  | -3.73 | 0.0003221 | 0.0020291 | -0.36 |
| ILMN_1794950 | RGAG1      | -0.09 | 6.29  | -3.73 | 0.0003241 | 0.0020414 | -0.37 |
| ILMN_1658636 | MRE11A     | -0.13 | 6.90  | -3.73 | 0.0003244 | 0.0020427 | -0.37 |
| ILMN_2333687 | CD59       | 0.14  | 6.76  | 3.73  | 0.0003244 | 0.0020427 | -0.37 |
| ILMN_1794046 | MTX2       | -0.17 | 7.69  | -3.73 | 0.0003248 | 0.0020447 | -0.37 |
| ILMN_1664912 | IL11RA     | -0.26 | 8.79  | -3.73 | 0.0003254 | 0.0020482 | -0.37 |
| ILMN_1724211 | GPRC5C     | -0.15 | 6.85  | -3.73 | 0.0003264 | 0.0020541 | -0.38 |
| ILMN_1665291 | NUB1       | -0.18 | 8.90  | -3.73 | 0.0003265 | 0.0020546 | -0.37 |
| ILMN_1708721 | RABGAP1L   | 0.13  | 7.08  | 3.72  | 0.0003266 | 0.0020546 | -0.38 |
| ILMN_1766154 | MRPL30     | 0.17  | 7.32  | 3.72  | 0.000327  | 0.0020566 | -0.38 |
| ILMN_1710859 | PCSK1      | 0.36  | 7.05  | 3.72  | 0.0003293 | 0.0020708 | -0.38 |
| ILMN_2090782 | GCSH       | 0.15  | 7.28  | 3.72  | 0.0003297 | 0.0020729 | -0.38 |
| ILMN_1747903 | DNAJC11    | -0.12 | 6.63  | -3.72 | 0.0003308 | 0.0020795 | -0.39 |
| ILMN_1800354 | CST3       | -0.18 | 12.38 | -3.72 | 0.0003314 | 0.0020832 | -0.39 |
| ILMN_2275803 | LRRC45     | -0.14 | 6.86  | -3.72 | 0.0003316 | 0.002084  | -0.39 |
| ILMN_1736015 | JADE1      | 0.13  | 6.98  | 3.72  | 0.0003324 | 0.0020885 | -0.39 |
| ILMN_2320336 | CLK3       | -0.14 | 8.42  | -3.72 | 0.0003347 | 0.0021024 | -0.40 |
| ILMN_1737475 | ABHD11     | -0.19 | 6.91  | -3.72 | 0.0003349 | 0.0021025 | -0.40 |
| ILMN_1810176 | MAP3K7     | 0.11  | 8.58  | 3.72  | 0.0003349 | 0.0021025 | -0.39 |
| ILMN_3304898 | TUBB       | 0.27  | 8.08  | 3.72  | 0.0003348 | 0.0021025 | -0.40 |
| ILMN_1740269 | WNT2B      | 0.16  | 7.11  | 3.72  | 0.000335  | 0.0021027 | -0.40 |
| ILMN_1772943 | CXorf23    | -0.12 | 6.78  | -3.72 | 0.0003354 | 0.0021051 | -0.40 |
| ILMN_1737157 | GRAMD1A    | 0.20  | 7.71  | 3.72  | 0.0003355 | 0.0021056 | -0.40 |
| ILMN_2061537 | UGT1A8     | -0.24 | 6.78  | -3.72 | 0.0003362 | 0.0021095 | -0.40 |
| ILMN_1753143 | RHPN2      | 0.35  | 10.56 | 3.72  | 0.0003372 | 0.0021151 | -0.41 |
| ILMN_1664537 | USP11      | 0.15  | 7.06  | 3.71  | 0.0003383 | 0.0021215 | -0.41 |
| ILMN_1770682 | TEP1       | -0.15 | 6.60  | -3.71 | 0.0003383 | 0.0021215 | -0.41 |
| ILMN_1698330 | NIT1       | -0.12 | 6.74  | -3.71 | 0.0003401 | 0.0021323 | -0.41 |
| ILMN_1799669 | PSORS1C1   | 0.23  | 6.87  | 3.71  | 0.0003416 | 0.0021414 | -0.42 |
| ILMN_1693905 | HAT1       | 0.17  | 7.32  | 3.71  | 0.0003419 | 0.0021427 | -0.42 |
| ILMN_1815345 | EIF3J      | 0.17  | 7.93  | 3.71  | 0.0003419 | 0.0021427 | -0.42 |
| ILMN_1696027 | MPHOSPH8   | -0.22 | 9.76  | -3.71 | 0.0003422 | 0.0021437 | -0.42 |
| ILMN_1839019 | LPP        | 0.28  | 10.22 | 3.71  | 0.0003424 | 0.002145  | -0.42 |
| ILMN_3239771 | DLGAP5     | 0.23  | 7.21  | 3.71  | 0.000343  | 0.0021482 | -0.42 |
| ILMN_1776464 | PARP4      | -0.23 | 10.64 | -3.71 | 0.0003435 | 0.002151  | -0.42 |
| ILMN_1804662 | NRG4       | -0.12 | 6.60  | -3.71 | 0.0003438 | 0.0021523 | -0.42 |
| ILMN_1757627 | ZMYND19    | 0.14  | 7.21  | 3.71  | 0.0003446 | 0.0021568 | -0.43 |
| ILMN_1727023 | AMMECR1L   | 0.14  | 7.39  | 3.71  | 0.0003451 | 0.0021595 | -0.43 |
| ILMN_1799030 | CMTM2      | 0.16  | 6.42  | 3.71  | 0.0003454 | 0.002161  | -0.43 |
| ILMN_1737124 | PRPF4B     | -0.13 | 6.95  | -3.71 | 0.0003455 | 0.0021613 | -0.43 |
| ILMN_2213199 | CEP44      | -0.17 | 8.62  | -3.71 | 0.0003464 | 0.0021668 | -0.43 |
| ILMN_1740351 | IST1       | -0.14 | 9.94  | -3.71 | 0.0003471 | 0.0021699 | -0.43 |
| ILMN_1757338 | PLSCR4     | -0.29 | 8.72  | -3.71 | 0.000347  | 0.0021699 | -0.43 |
| ILMN_3275345 | RPS27      | 0.31  | 10.85 | 3.71  | 0.0003475 | 0.0021722 | -0.43 |
| ILMN_1651967 | TP53I3     | -0.12 | 6.64  | -3.71 | 0.0003478 | 0.0021736 | -0.44 |
| ILMN_1749014 | ACLY       | 0.23  | 8.74  | 3.71  | 0.0003478 | 0.0021736 | -0.44 |
| ILMN_1771697 | VRK3       | -0.25 | 8.25  | -3.71 | 0.0003484 | 0.0021766 | -0.44 |

|              |           |       |       |       |           |           |       |
|--------------|-----------|-------|-------|-------|-----------|-----------|-------|
| ILMN_1697232 | HOXA11-AS | -0.13 | 6.57  | -3.71 | 0.0003486 | 0.0021777 | -0.44 |
| ILMN_1668822 | BATF      | 0.18  | 6.58  | 3.71  | 0.0003487 | 0.0021779 | -0.44 |
| ILMN_3242229 | HPSE2     | 0.15  | 6.59  | 3.71  | 0.0003491 | 0.00218   | -0.44 |
| ILMN_1696391 | LEPR      | 0.10  | 6.45  | 3.70  | 0.00035   | 0.0021853 | -0.44 |
| ILMN_1674629 | C9orf3    | 0.11  | 6.77  | 3.71  | 0.0003501 | 0.0021856 | -0.44 |
| ILMN_1698985 | DCAF6     | -0.14 | 7.12  | -3.70 | 0.0003506 | 0.0021879 | -0.44 |
| ILMN_2371685 | UBE2E1    | -0.23 | 7.38  | -3.70 | 0.0003506 | 0.0021879 | -0.44 |
| ILMN_1739645 | ANLN      | 0.20  | 7.02  | 3.70  | 0.0003523 | 0.0021981 | -0.45 |
| ILMN_1814173 | SMARCA4   | -0.13 | 9.44  | -3.70 | 0.0003528 | 0.0022006 | -0.44 |
| ILMN_1691295 | NECTIN1   | -0.10 | 6.52  | -3.70 | 0.0003531 | 0.002202  | -0.45 |
| ILMN_2277419 | SLC38A10  | -0.13 | 7.00  | -3.70 | 0.0003539 | 0.0022065 | -0.45 |
| ILMN_1724753 | NIN       | 0.21  | 7.63  | 3.70  | 0.000354  | 0.0022071 | -0.45 |
| ILMN_1759411 | BRICD5    | -0.13 | 6.81  | -3.70 | 0.0003542 | 0.0022077 | -0.45 |
| ILMN_1727605 | FRK       | -0.17 | 7.03  | -3.70 | 0.0003552 | 0.0022134 | -0.45 |
| ILMN_1783695 | EPRS      | 0.16  | 9.75  | 3.70  | 0.0003553 | 0.002214  | -0.46 |
| ILMN_1724396 | GCG       | -0.98 | 8.94  | -3.70 | 0.0003563 | 0.0022197 | -0.46 |
| ILMN_2407775 | RGS13     | 0.13  | 6.58  | 3.70  | 0.0003567 | 0.0022221 | -0.46 |
| ILMN_1762792 | MAGED1    | -0.12 | 6.64  | -3.70 | 0.0003574 | 0.0022257 | -0.46 |
| ILMN_1674486 | KIAA2026  | -0.12 | 6.65  | -3.70 | 0.0003576 | 0.0022267 | -0.46 |
| ILMN_1736670 | PPP1R3C   | 0.22  | 7.18  | 3.70  | 0.0003586 | 0.0022323 | -0.46 |
| ILMN_1776121 | KIAA1211L | -0.25 | 7.97  | -3.70 | 0.0003586 | 0.0022323 | -0.46 |
| ILMN_2333774 | TAGAP     | 0.16  | 6.54  | 3.70  | 0.0003602 | 0.0022414 | -0.47 |
| ILMN_1703108 | UBE2L6    | 0.20  | 7.30  | 3.70  | 0.0003612 | 0.0022473 | -0.46 |
| ILMN_1704842 | ARL4A     | 0.12  | 6.55  | 3.70  | 0.0003617 | 0.00225   | -0.47 |
| ILMN_2051232 | SDHA      | -0.20 | 9.66  | -3.69 | 0.0003624 | 0.0022539 | -0.47 |
| ILMN_2070570 | ABCA10    | -0.13 | 6.62  | -3.69 | 0.0003631 | 0.0022577 | -0.48 |
| ILMN_1796240 | TRAPPC8   | -0.13 | 9.08  | -3.69 | 0.0003652 | 0.0022706 | -0.48 |
| ILMN_1800530 | AGAP1     | -0.24 | 8.79  | -3.69 | 0.0003662 | 0.0022767 | -0.48 |
| ILMN_1686884 | IL1RAP    | 0.11  | 6.67  | 3.69  | 0.0003702 | 0.0023008 | -0.49 |
| ILMN_2341724 | ANKRD55   | 0.11  | 6.38  | 3.69  | 0.0003716 | 0.0023093 | -0.50 |
| ILMN_1706583 | DLAT      | -0.16 | 8.05  | -3.69 | 0.0003725 | 0.0023144 | -0.50 |
| ILMN_1690170 | CRABP2    | 0.11  | 6.62  | 3.69  | 0.0003734 | 0.0023191 | -0.50 |
| ILMN_2141790 | HYOU1     | 0.20  | 7.51  | 3.69  | 0.0003735 | 0.0023191 | -0.50 |
| ILMN_3249167 | SNORA63   | 0.17  | 6.76  | 3.69  | 0.0003735 | 0.0023191 | -0.50 |
| ILMN_1728521 | HDAC7     | 0.13  | 6.78  | 3.69  | 0.0003736 | 0.0023197 | -0.50 |
| ILMN_2272708 | NA        | -0.12 | 6.58  | -3.69 | 0.0003737 | 0.0023198 | -0.50 |
| ILMN_2372011 | SCAND1    | -0.18 | 7.77  | -3.69 | 0.0003749 | 0.0023265 | -0.51 |
| ILMN_3239912 | HSFY1P1   | -0.10 | 6.64  | -3.68 | 0.0003751 | 0.0023275 | -0.51 |
| ILMN_2232854 | FAP       | 0.18  | 6.66  | 3.69  | 0.0003761 | 0.0023336 | -0.50 |
| ILMN_1789502 | GPC4      | 0.16  | 7.73  | 3.68  | 0.0003774 | 0.002341  | -0.51 |
| ILMN_1735353 | IRX1      | -0.14 | 7.46  | -3.68 | 0.0003779 | 0.0023437 | -0.51 |
| ILMN_2391765 | C6orf48   | 0.26  | 9.97  | 3.68  | 0.000378  | 0.0023437 | -0.51 |
| ILMN_1720501 | ABCA9     | -0.21 | 7.13  | -3.68 | 0.0003782 | 0.0023443 | -0.51 |
| ILMN_2229969 | ERO1B     | 0.11  | 6.48  | 3.68  | 0.0003782 | 0.0023443 | -0.51 |
| ILMN_1783156 | MAP2K3    | 0.24  | 8.09  | 3.68  | 0.0003794 | 0.0023511 | -0.52 |
| ILMN_1799604 | OCIAD1    | -0.14 | 10.27 | -3.68 | 0.0003798 | 0.0023536 | -0.52 |
| ILMN_3273885 | C8orf88   | 0.15  | 6.56  | 3.68  | 0.0003814 | 0.0023626 | -0.52 |
| ILMN_1676629 | INSIG2    | 0.17  | 7.95  | 3.68  | 0.0003815 | 0.0023631 | -0.52 |

|              |            |       |       |       |           |           |       |
|--------------|------------|-------|-------|-------|-----------|-----------|-------|
| ILMN_2220184 | GFPT1      | -0.23 | 9.35  | -3.68 | 0.0003816 | 0.0023633 | -0.52 |
| ILMN_1799232 | ATP9A      | -0.10 | 6.51  | -3.68 | 0.0003817 | 0.0023634 | -0.52 |
| ILMN_1662198 | RANGAP1    | 0.20  | 8.64  | 3.68  | 0.0003822 | 0.0023664 | -0.52 |
| ILMN_1761411 | MCMBP      | 0.10  | 6.67  | 3.68  | 0.0003825 | 0.0023672 | -0.52 |
| ILMN_1750429 | MKNK1      | -0.17 | 8.41  | -3.68 | 0.0003832 | 0.0023714 | -0.53 |
| ILMN_1729217 | FAM131A    | 0.15  | 7.50  | 3.68  | 0.0003841 | 0.0023763 | -0.53 |
| ILMN_1716563 | PRKCB      | 0.25  | 6.85  | 3.68  | 0.0003846 | 0.002379  | -0.53 |
| ILMN_1736353 | PSMC1      | 0.11  | 10.84 | 3.68  | 0.0003849 | 0.0023808 | -0.53 |
| ILMN_1657483 | SEC23B     | 0.19  | 8.92  | 3.68  | 0.0003855 | 0.0023834 | -0.53 |
| ILMN_2051373 | NEK2       | 0.24  | 7.35  | 3.68  | 0.0003854 | 0.0023834 | -0.53 |
| ILMN_2372403 | ALDH5A1    | -0.17 | 7.27  | -3.68 | 0.0003858 | 0.002385  | -0.53 |
| ILMN_1683635 | C11orf70   | 0.10  | 6.57  | 3.68  | 0.0003863 | 0.0023874 | -0.53 |
| ILMN_1738369 | TUFM       | -0.18 | 9.31  | -3.68 | 0.0003864 | 0.0023877 | -0.53 |
| ILMN_1775943 | BRMS1L     | 0.17  | 7.20  | 3.68  | 0.0003866 | 0.0023886 | -0.52 |
| ILMN_2368575 | NA         | -0.19 | 7.66  | -3.68 | 0.0003868 | 0.0023888 | -0.53 |
| ILMN_3236423 | RAB3GAP2   | 0.13  | 8.72  | 3.68  | 0.0003867 | 0.0023888 | -0.53 |
| ILMN_1743204 | DUSP8      | -0.23 | 7.58  | -3.68 | 0.0003872 | 0.0023909 | -0.54 |
| ILMN_1710289 | CNTN5      | -0.10 | 6.48  | -3.68 | 0.0003874 | 0.0023919 | -0.54 |
| ILMN_1739335 | OST4       | 0.18  | 10.48 | 3.67  | 0.0003891 | 0.0024018 | -0.54 |
| ILMN_3290428 | SSC5D      | 0.11  | 6.57  | 3.67  | 0.0003894 | 0.0024033 | -0.54 |
| ILMN_1814122 | MDC1       | 0.18  | 8.17  | 3.67  | 0.0003896 | 0.0024042 | -0.54 |
| ILMN_3238132 | HNF1A      | -0.12 | 6.75  | -3.67 | 0.0003901 | 0.0024067 | -0.54 |
| ILMN_2115218 | ANKRD10    | 0.19  | 8.55  | 3.67  | 0.0003912 | 0.0024134 | -0.55 |
| ILMN_1661346 | HNRNPA1    | 0.25  | 9.64  | 3.67  | 0.0003926 | 0.0024206 | -0.55 |
| ILMN_1667115 | TMEM61     | -0.14 | 6.80  | -3.67 | 0.0003926 | 0.0024206 | -0.54 |
| ILMN_1716026 | ARMCX6     | 0.18  | 7.10  | 3.67  | 0.0003926 | 0.0024206 | -0.55 |
| ILMN_1786357 | NA         | 0.13  | 6.54  | 3.67  | 0.0003935 | 0.0024253 | -0.55 |
| ILMN_1701724 | GET4       | -0.18 | 7.39  | -3.67 | 0.0003937 | 0.0024261 | -0.55 |
| ILMN_1651899 | RPL19      | 0.17  | 12.54 | 3.67  | 0.0003938 | 0.0024263 | -0.55 |
| ILMN_1666632 | VPS52      | -0.13 | 7.72  | -3.67 | 0.000394  | 0.0024276 | -0.55 |
| ILMN_2150196 | LRRC25     | 0.11  | 6.41  | 3.67  | 0.0003959 | 0.0024386 | -0.56 |
| ILMN_1750145 | YWHAG      | 0.21  | 8.02  | 3.67  | 0.0003961 | 0.0024392 | -0.56 |
| ILMN_2322842 | PPHLN1     | 0.15  | 7.86  | 3.67  | 0.0003966 | 0.0024423 | -0.56 |
| ILMN_1706969 | BEND6      | 0.10  | 6.46  | 3.67  | 0.000399  | 0.0024551 | -0.56 |
| ILMN_1724207 | IVD        | -0.13 | 6.94  | -3.67 | 0.0003988 | 0.0024551 | -0.56 |
| ILMN_1764396 | HDAC4      | 0.14  | 6.92  | 3.67  | 0.0003989 | 0.0024551 | -0.56 |
| ILMN_2333107 | AES        | -0.23 | 8.57  | -3.67 | 0.000399  | 0.0024551 | -0.56 |
| ILMN_1679382 | CCT2       | 0.20  | 9.14  | 3.67  | 0.0003994 | 0.0024569 | -0.56 |
| ILMN_1699503 | UBE2D2     | -0.13 | 7.63  | -3.67 | 0.0003999 | 0.0024598 | -0.57 |
| ILMN_1684205 | CIB1       | -0.19 | 11.81 | -3.67 | 0.0004001 | 0.0024604 | -0.57 |
| ILMN_2145997 | SP4        | 0.17  | 7.24  | 3.67  | 0.0004001 | 0.0024604 | -0.57 |
| ILMN_1750394 | SLC39A6    | 0.13  | 7.07  | 3.67  | 0.0004006 | 0.0024629 | -0.57 |
| ILMN_2144088 | FDFT1      | -0.29 | 10.61 | -3.67 | 0.000401  | 0.0024648 | -0.57 |
| ILMN_1658399 | KLRG1      | 0.19  | 6.93  | 3.67  | 0.0004018 | 0.0024691 | -0.56 |
| ILMN_3240375 | IGKV1ORY-1 | 1.12  | 11.47 | 3.66  | 0.0004031 | 0.002477  | -0.57 |
| ILMN_1657002 | OR51B5     | -0.12 | 6.49  | -3.66 | 0.0004035 | 0.002479  | -0.57 |
| ILMN_1682894 | NA         | -0.11 | 6.61  | -3.66 | 0.0004036 | 0.002479  | -0.57 |
| ILMN_2388177 | SPATA7     | 0.11  | 6.73  | 3.66  | 0.0004054 | 0.0024897 | -0.58 |

|              |          |       |       |       |           |           |       |
|--------------|----------|-------|-------|-------|-----------|-----------|-------|
| ILMN_2320164 | P2RY12   | 0.10  | 6.53  | 3.66  | 0.0004068 | 0.0024978 | -0.58 |
| ILMN_1787370 | NDUFAF7  | 0.10  | 6.73  | 3.66  | 0.0004071 | 0.0024993 | -0.58 |
| ILMN_1796180 | CRY2     | -0.10 | 7.79  | -3.66 | 0.0004073 | 0.0024997 | -0.58 |
| ILMN_1789596 | ETV6     | -0.16 | 8.57  | -3.66 | 0.0004078 | 0.0025024 | -0.58 |
| ILMN_1795419 | CNPPD1   | -0.21 | 8.14  | -3.66 | 0.0004086 | 0.0025071 | -0.59 |
| ILMN_1653612 | KCTD9    | -0.18 | 8.55  | -3.66 | 0.0004098 | 0.002514  | -0.59 |
| ILMN_1687960 | LIMK2    | -0.12 | 6.60  | -3.66 | 0.0004101 | 0.0025155 | -0.59 |
| ILMN_1657234 | CCL20    | -0.82 | 9.18  | -3.66 | 0.0004103 | 0.0025158 | -0.59 |
| ILMN_2403906 | ARFIP1   | -0.19 | 8.52  | -3.66 | 0.0004104 | 0.0025163 | -0.59 |
| ILMN_1755926 | DBI      | -0.28 | 9.52  | -3.66 | 0.0004106 | 0.0025172 | -0.59 |
| ILMN_1760933 | PEX10    | -0.14 | 7.73  | -3.66 | 0.0004115 | 0.0025222 | -0.59 |
| ILMN_1780444 | ARL3     | 0.10  | 6.54  | 3.66  | 0.0004122 | 0.0025258 | -0.59 |
| ILMN_1721138 | GRPEL2   | 0.14  | 8.17  | 3.66  | 0.0004128 | 0.0025295 | -0.60 |
| ILMN_1785570 | SUSD3    | 0.22  | 6.89  | 3.66  | 0.0004142 | 0.0025376 | -0.60 |
| ILMN_1760201 | DNMT1    | 0.26  | 9.97  | 3.66  | 0.0004148 | 0.0025406 | -0.60 |
| ILMN_2155719 | NBPF10   | -0.32 | 9.87  | -3.65 | 0.0004157 | 0.0025456 | -0.60 |
| ILMN_1744980 | ZCCHC7   | 0.16  | 8.31  | 3.65  | 0.0004166 | 0.0025506 | -0.60 |
| ILMN_1904400 | NA       | -0.12 | 6.58  | -3.65 | 0.0004181 | 0.0025597 | -0.61 |
| ILMN_1713450 | MYL6B    | 0.17  | 7.93  | 3.65  | 0.000419  | 0.0025643 | -0.61 |
| ILMN_1791884 | SNHG11   | -0.11 | 6.99  | -3.65 | 0.0004199 | 0.0025696 | -0.61 |
| ILMN_1659227 | CD79A    | 0.38  | 7.01  | 3.65  | 0.0004202 | 0.0025705 | -0.61 |
| ILMN_1671427 | FBXW4    | -0.15 | 7.92  | -3.65 | 0.0004202 | 0.0025705 | -0.61 |
| ILMN_1851547 | FAM120C  | 0.10  | 6.67  | 3.65  | 0.0004203 | 0.0025705 | -0.61 |
| ILMN_1703891 | TBC1D9   | 0.21  | 7.31  | 3.65  | 0.0004206 | 0.0025721 | -0.61 |
| ILMN_3211302 | NA       | 0.11  | 6.73  | 3.65  | 0.0004211 | 0.0025746 | -0.61 |
| ILMN_3266186 | HDAC7    | 0.15  | 6.80  | 3.65  | 0.0004223 | 0.0025812 | -0.62 |
| ILMN_1674768 | PI4KAP2  | -0.18 | 7.32  | -3.65 | 0.0004225 | 0.0025825 | -0.62 |
| ILMN_2377240 | AKTIP    | -0.17 | 8.97  | -3.65 | 0.000423  | 0.0025849 | -0.61 |
| ILMN_2100693 | MAP2K4   | -0.12 | 7.42  | -3.65 | 0.0004234 | 0.002587  | -0.62 |
| ILMN_1684461 | CADPS2   | 0.14  | 7.71  | 3.65  | 0.0004243 | 0.0025918 | -0.62 |
| ILMN_2195236 | PGRMC2   | -0.16 | 9.35  | -3.65 | 0.0004248 | 0.0025942 | -0.62 |
| ILMN_1720857 | NA       | -0.24 | 8.39  | -3.65 | 0.0004256 | 0.0025986 | -0.62 |
| ILMN_2355953 | LILRB4   | 0.16  | 6.66  | 3.65  | 0.0004256 | 0.0025986 | -0.62 |
| ILMN_1730631 | C2orf44  | 0.14  | 7.43  | 3.65  | 0.0004262 | 0.0026018 | -0.63 |
| ILMN_1740675 | ACAN     | 0.12  | 6.41  | 3.65  | 0.0004266 | 0.0026037 | -0.63 |
| ILMN_1708782 | MFAP3    | -0.11 | 7.12  | -3.65 | 0.0004281 | 0.0026124 | -0.63 |
| ILMN_1688000 | POLDIP3  | -0.12 | 8.30  | -3.65 | 0.0004295 | 0.0026203 | -0.63 |
| ILMN_1797693 | BRI3BP   | -0.20 | 7.46  | -3.65 | 0.0004298 | 0.002622  | -0.63 |
| ILMN_1784178 | IFT172   | -0.13 | 7.11  | -3.64 | 0.0004305 | 0.0026254 | -0.63 |
| ILMN_1720513 | SETBP1   | 0.17  | 7.62  | 3.64  | 0.0004318 | 0.0026329 | -0.64 |
| ILMN_1681249 | KIF21A   | -0.17 | 8.35  | -3.64 | 0.0004343 | 0.0026477 | -0.64 |
| ILMN_1768505 | IL13RA1  | -0.18 | 10.28 | -3.64 | 0.0004346 | 0.002649  | -0.64 |
| ILMN_1724897 | C14orf93 | -0.14 | 7.56  | -3.64 | 0.0004363 | 0.0026591 | -0.65 |
| ILMN_1731048 | TLR1     | 0.13  | 6.54  | 3.64  | 0.0004364 | 0.0026591 | -0.65 |
| ILMN_1735910 | VMO1     | 0.09  | 6.57  | 3.64  | 0.0004383 | 0.0026697 | -0.65 |
| ILMN_3237324 | MMS19    | -0.17 | 8.55  | -3.64 | 0.0004382 | 0.0026697 | -0.65 |
| ILMN_2218758 | NECAB1   | 0.13  | 6.46  | 3.64  | 0.0004385 | 0.0026702 | -0.65 |
| ILMN_1697694 | ATP6AP1  | -0.15 | 10.67 | -3.64 | 0.0004386 | 0.0026704 | -0.65 |

|              |          |       |       |       |           |           |       |
|--------------|----------|-------|-------|-------|-----------|-----------|-------|
| ILMN_2414533 | ARMCX6   | 0.12  | 7.26  | 3.64  | 0.0004398 | 0.0026777 | -0.66 |
| ILMN_1852224 | NA       | -0.14 | 6.74  | -3.64 | 0.0004435 | 0.0026993 | -0.66 |
| ILMN_1797181 | LOC93622 | -0.16 | 7.12  | -3.64 | 0.0004437 | 0.0027004 | -0.66 |
| ILMN_1726025 | ASXL1    | 0.12  | 7.42  | 3.64  | 0.0004442 | 0.0027029 | -0.65 |
| ILMN_1666409 | PSMB6    | 0.13  | 10.68 | 3.63  | 0.0004462 | 0.0027144 | -0.67 |
| ILMN_2129349 | TSSC1    | 0.18  | 7.82  | 3.63  | 0.0004468 | 0.0027176 | -0.67 |
| ILMN_2404154 | SERPINA1 | 0.49  | 9.71  | 3.63  | 0.0004478 | 0.0027234 | -0.67 |
| ILMN_1792597 | CRYGS    | -0.12 | 7.01  | -3.63 | 0.0004488 | 0.0027292 | -0.67 |
| ILMN_1716279 | CENPE    | 0.19  | 7.21  | 3.63  | 0.0004489 | 0.0027293 | -0.67 |
| ILMN_1656938 | SLC37A2  | -0.40 | 7.10  | -3.63 | 0.000449  | 0.0027294 | -0.67 |
| ILMN_2238795 | NEK3     | -0.09 | 6.30  | -3.63 | 0.0004493 | 0.0027305 | -0.68 |
| ILMN_1709026 | PXDC1    | 0.11  | 6.61  | 3.63  | 0.0004504 | 0.002737  | -0.67 |
| ILMN_1767446 | RNF150   | 0.21  | 7.04  | 3.63  | 0.0004513 | 0.0027418 | -0.68 |
| ILMN_1711078 | NA       | -0.20 | 7.27  | -3.63 | 0.0004523 | 0.0027474 | -0.68 |
| ILMN_1686194 | CWC27    | 0.12  | 8.12  | 3.63  | 0.0004524 | 0.0027477 | -0.68 |
| ILMN_1660368 | TRRAP    | 0.12  | 9.35  | 3.63  | 0.000453  | 0.00275   | -0.68 |
| ILMN_1788955 | PDLIM1   | -0.21 | 10.08 | -3.63 | 0.000453  | 0.00275   | -0.68 |
| ILMN_1724825 | PCBP2    | 0.17  | 9.20  | 3.63  | 0.0004535 | 0.0027524 | -0.68 |
| ILMN_1798546 | HDAC6    | -0.14 | 7.54  | -3.63 | 0.0004535 | 0.0027524 | -0.68 |
| ILMN_1793033 | RBM28    | 0.12  | 6.93  | 3.63  | 0.000454  | 0.0027545 | -0.68 |
| ILMN_1665437 | CYP2E1   | 0.11  | 6.62  | 3.63  | 0.0004546 | 0.0027573 | -0.69 |
| ILMN_1735275 | WDSUB1   | -0.17 | 7.96  | -3.63 | 0.0004545 | 0.0027573 | -0.68 |
| ILMN_2410826 | OAS1     | -0.35 | 8.22  | -3.63 | 0.0004561 | 0.0027658 | -0.69 |
| ILMN_1805024 | ERBIN    | -0.14 | 6.88  | -3.63 | 0.000457  | 0.0027711 | -0.69 |
| ILMN_1696432 | IDH1     | -0.34 | 8.71  | -3.63 | 0.0004573 | 0.002772  | -0.69 |
| ILMN_2277537 | MUTYH    | -0.11 | 6.53  | -3.63 | 0.0004573 | 0.002772  | -0.69 |
| ILMN_1689842 | MSMO1    | -0.38 | 7.41  | -3.63 | 0.0004575 | 0.0027723 | -0.69 |
| ILMN_1763852 | ACACB    | -0.25 | 8.13  | -3.63 | 0.0004584 | 0.0027778 | -0.69 |
| ILMN_3270683 | RPL19P12 | -0.11 | 6.52  | -3.63 | 0.0004596 | 0.0027844 | -0.70 |
| ILMN_2087656 | SLCO2B1  | 0.30  | 9.04  | 3.63  | 0.0004598 | 0.0027847 | -0.70 |
| ILMN_1658351 | FIS1     | -0.18 | 8.67  | -3.62 | 0.0004608 | 0.0027903 | -0.70 |
| ILMN_3250389 | GPAA1    | -0.11 | 6.86  | -3.62 | 0.0004637 | 0.0028075 | -0.70 |
| ILMN_2395043 | HSPA4    | 0.19  | 8.29  | 3.62  | 0.0004649 | 0.0028144 | -0.70 |
| ILMN_1806328 | PDIK1L   | -0.15 | 7.24  | -3.62 | 0.0004655 | 0.0028176 | -0.71 |
| ILMN_1668582 | CRBN     | -0.19 | 8.24  | -3.62 | 0.0004679 | 0.0028313 | -0.71 |
| ILMN_1677906 | NA       | 0.22  | 8.53  | 3.62  | 0.0004679 | 0.0028313 | -0.71 |
| ILMN_1684789 | SGF29    | -0.12 | 7.07  | -3.62 | 0.0004691 | 0.0028376 | -0.72 |
| ILMN_1675009 | NMUR2    | 0.35  | 6.51  | 3.62  | 0.0004695 | 0.00284   | -0.71 |
| ILMN_1721391 | ATP6V0B  | -0.15 | 10.00 | -3.62 | 0.0004701 | 0.002843  | -0.72 |
| ILMN_1790757 | ADSL     | 0.18  | 9.24  | 3.62  | 0.0004718 | 0.0028524 | -0.72 |
| ILMN_1717393 | PTCHD1   | 0.16  | 6.47  | 3.62  | 0.0004732 | 0.0028604 | -0.72 |
| ILMN_2225548 | ZNF521   | 0.10  | 6.44  | 3.62  | 0.0004732 | 0.0028604 | -0.72 |
| ILMN_1698311 | ABHD12B  | -0.14 | 6.61  | -3.62 | 0.0004755 | 0.0028733 | -0.72 |
| ILMN_1682326 | PCP4     | 0.34  | 6.64  | 3.62  | 0.0004764 | 0.0028783 | -0.73 |
| ILMN_3234837 | PKDCC    | -0.32 | 7.78  | -3.62 | 0.0004784 | 0.00289   | -0.73 |
| ILMN_1657288 | GUSBP4   | -0.13 | 7.23  | -3.61 | 0.0004804 | 0.0029012 | -0.74 |
| ILMN_1744068 | ELP3     | -0.16 | 8.20  | -3.61 | 0.0004804 | 0.0029012 | -0.74 |
| ILMN_1766505 | COMMD10  | 0.13  | 7.97  | 3.61  | 0.0004807 | 0.0029025 | -0.74 |

|              |          |       |       |       |           |           |       |
|--------------|----------|-------|-------|-------|-----------|-----------|-------|
| ILMN_1687484 | ZFX      | -0.18 | 7.12  | -3.61 | 0.0004818 | 0.0029088 | -0.74 |
| ILMN_1734553 | NA       | -0.11 | 6.76  | -3.61 | 0.000482  | 0.0029091 | -0.74 |
| ILMN_1659960 | IL4I1    | 0.13  | 6.57  | 3.61  | 0.0004822 | 0.0029096 | -0.74 |
| ILMN_1667030 | HSBP1    | -0.12 | 9.89  | -3.61 | 0.0004831 | 0.0029148 | -0.74 |
| ILMN_1656940 | ABLIM3   | 0.12  | 6.57  | 3.61  | 0.0004841 | 0.0029206 | -0.74 |
| ILMN_1910330 | NA       | -0.14 | 7.35  | -3.61 | 0.0004854 | 0.0029276 | -0.75 |
| ILMN_3248511 | FAM167A  | 0.17  | 6.78  | 3.61  | 0.0004855 | 0.002928  | -0.74 |
| ILMN_1674051 | CCHCR1   | -0.12 | 6.64  | -3.61 | 0.0004871 | 0.0029367 | -0.75 |
| ILMN_1762115 | CRYZL1   | -0.17 | 7.84  | -3.61 | 0.0004872 | 0.0029371 | -0.75 |
| ILMN_1909156 | NA       | -0.31 | 7.37  | -3.61 | 0.0004876 | 0.0029389 | -0.75 |
| ILMN_2336970 | MUTYH    | -0.12 | 6.56  | -3.61 | 0.0004896 | 0.0029503 | -0.75 |
| ILMN_3289171 | RPS27    | 0.15  | 6.86  | 3.61  | 0.00049   | 0.0029523 | -0.76 |
| ILMN_2307450 | ZNF302   | -0.17 | 9.16  | -3.61 | 0.0004912 | 0.0029593 | -0.76 |
| ILMN_1777528 | NCBP1    | -0.14 | 8.80  | -3.61 | 0.0004919 | 0.0029627 | -0.76 |
| ILMN_1666594 | IRF8     | 0.34  | 9.38  | 3.60  | 0.0004932 | 0.0029703 | -0.76 |
| ILMN_1751559 | NA       | 0.15  | 6.82  | 3.60  | 0.0004933 | 0.0029703 | -0.76 |
| ILMN_1666761 | PPP2R5E  | -0.15 | 9.65  | -3.60 | 0.000494  | 0.0029741 | -0.76 |
| ILMN_2155708 | TLR3     | -0.15 | 6.56  | -3.60 | 0.0004964 | 0.0029876 | -0.77 |
| ILMN_1729433 | LIPH     | -0.14 | 6.76  | -3.60 | 0.0004974 | 0.0029931 | -0.77 |
| ILMN_1754130 | TRIM52   | -0.13 | 7.29  | -3.60 | 0.0004982 | 0.0029967 | -0.77 |
| ILMN_1795344 | GOLIM4   | -0.25 | 8.55  | -3.60 | 0.0004982 | 0.0029967 | -0.77 |
| ILMN_2354381 | PON2     | -0.17 | 10.53 | -3.60 | 0.0004982 | 0.0029967 | -0.77 |
| ILMN_2377385 | SERPINA9 | 0.21  | 6.54  | 3.60  | 0.0004985 | 0.0029977 | -0.77 |
| ILMN_1731966 | LEPR     | 0.10  | 6.56  | 3.60  | 0.0004989 | 0.0029996 | -0.77 |
| ILMN_1686562 | KIF13B   | -0.21 | 9.26  | -3.60 | 0.0004991 | 0.0030003 | -0.77 |
| ILMN_1792473 | AIF1     | 0.38  | 8.86  | 3.60  | 0.000501  | 0.0030112 | -0.78 |
| ILMN_1728742 | FAXDC2   | -0.17 | 6.99  | -3.60 | 0.0005011 | 0.0030113 | -0.78 |
| ILMN_1694799 | PIAS2    | 0.10  | 7.38  | 3.60  | 0.0005031 | 0.0030214 | -0.78 |
| ILMN_1748881 | MRAS     | 0.09  | 6.47  | 3.60  | 0.0005029 | 0.0030214 | -0.78 |
| ILMN_1784286 | NDUFA1   | -0.17 | 12.00 | -3.60 | 0.000503  | 0.0030214 | -0.78 |
| ILMN_2377019 | CORO1B   | -0.15 | 7.03  | -3.60 | 0.0005031 | 0.0030214 | -0.78 |
| ILMN_1740861 | DTWD1    | 0.19  | 7.74  | 3.60  | 0.0005035 | 0.003023  | -0.78 |
| ILMN_1804415 | SMAGP    | -0.23 | 9.23  | -3.60 | 0.0005043 | 0.0030275 | -0.78 |
| ILMN_1715804 | PITPNA   | -0.13 | 7.09  | -3.60 | 0.0005048 | 0.0030297 | -0.78 |
| ILMN_1738784 | PPP2R5A  | -0.16 | 8.49  | -3.60 | 0.0005052 | 0.0030318 | -0.78 |
| ILMN_1805932 | C6orf163 | -0.13 | 6.60  | -3.60 | 0.0005057 | 0.0030334 | -0.79 |
| ILMN_2357419 | LILRA5   | 0.11  | 6.46  | 3.60  | 0.0005056 | 0.0030334 | -0.79 |
| ILMN_1740385 | CEP164   | 0.12  | 6.87  | 3.60  | 0.0005059 | 0.0030344 | -0.78 |
| ILMN_1898518 | GFRA1    | 0.21  | 7.02  | 3.60  | 0.0005065 | 0.0030371 | -0.79 |
| ILMN_2214713 | C4orf36  | -0.11 | 6.58  | -3.60 | 0.0005065 | 0.0030371 | -0.79 |
| ILMN_2248725 | TYSND1   | -0.11 | 6.50  | -3.60 | 0.000509  | 0.0030516 | -0.79 |
| ILMN_1726704 | RSC1A1   | 0.09  | 6.54  | 3.59  | 0.000511  | 0.0030626 | -0.80 |
| ILMN_3242330 | FAM65C   | 0.14  | 6.72  | 3.60  | 0.000511  | 0.0030626 | -0.78 |
| ILMN_1722158 | CASP5    | -0.37 | 7.30  | -3.59 | 0.0005131 | 0.003074  | -0.80 |
| ILMN_1722905 | MRPS11   | -0.17 | 8.44  | -3.59 | 0.0005131 | 0.003074  | -0.80 |
| ILMN_1750160 | FASTKD3  | -0.15 | 7.44  | -3.59 | 0.000514  | 0.0030788 | -0.80 |
| ILMN_1809859 | PCGF2    | -0.15 | 7.26  | -3.59 | 0.0005148 | 0.0030831 | -0.80 |
| ILMN_1747627 | ABCA2    | -0.16 | 6.82  | -3.59 | 0.0005156 | 0.0030872 | -0.80 |



|              |          |       |       |       |           |           |       |
|--------------|----------|-------|-------|-------|-----------|-----------|-------|
| ILMN_2320906 | RTN3     | -0.16 | 7.18  | -3.59 | 0.0005165 | 0.003092  | -0.80 |
| ILMN_1775182 | GSR      | -0.19 | 8.12  | -3.59 | 0.0005172 | 0.0030959 | -0.81 |
| ILMN_2415170 | VPS8     | -0.11 | 7.09  | -3.59 | 0.0005191 | 0.0031066 | -0.81 |
| ILMN_1691662 | HAVCR1P1 | -0.10 | 6.32  | -3.59 | 0.0005198 | 0.0031102 | -0.81 |
| ILMN_1713384 | TSHZ2    | 0.15  | 6.81  | 3.59  | 0.0005217 | 0.003121  | -0.81 |
| ILMN_1703852 | EFNB2    | 0.21  | 10.03 | 3.59  | 0.0005228 | 0.0031266 | -0.82 |
| ILMN_1803779 | AP2A2    | -0.14 | 6.93  | -3.59 | 0.0005228 | 0.0031266 | -0.82 |
| ILMN_1739942 | FAM117B  | -0.20 | 9.35  | -3.59 | 0.000523  | 0.0031269 | -0.82 |
| ILMN_1714805 | ZC3H14   | -0.11 | 6.97  | -3.59 | 0.0005231 | 0.0031271 | -0.82 |
| ILMN_1753712 | STX10    | -0.17 | 7.80  | -3.59 | 0.0005233 | 0.0031277 | -0.82 |
| ILMN_1771841 | FOSL1    | 0.19  | 6.64  | 3.59  | 0.0005244 | 0.0031339 | -0.82 |
| ILMN_1692413 | NMNAT1   | -0.15 | 6.99  | -3.59 | 0.0005246 | 0.0031346 | -0.82 |
| ILMN_1782045 | FKBP4    | -0.18 | 7.62  | -3.59 | 0.000525  | 0.0031362 | -0.82 |
| ILMN_1790202 | C1orf35  | -0.10 | 7.19  | -3.59 | 0.0005255 | 0.003139  | -0.82 |
| ILMN_2050617 | CCT6P1   | 0.16  | 8.64  | 3.59  | 0.0005269 | 0.0031465 | -0.82 |
| ILMN_1795128 | PROSER1  | -0.19 | 8.66  | -3.59 | 0.0005272 | 0.0031479 | -0.82 |
| ILMN_1701007 | PON3     | -0.19 | 7.23  | -3.59 | 0.0005279 | 0.0031516 | -0.82 |
| ILMN_1703683 | COG4     | -0.14 | 7.35  | -3.58 | 0.000528  | 0.0031517 | -0.83 |
| ILMN_3307777 | RETNLB   | -0.83 | 9.24  | -3.58 | 0.0005286 | 0.0031548 | -0.83 |
| ILMN_1737535 | TAF4     | -0.13 | 8.34  | -3.58 | 0.0005301 | 0.0031627 | -0.83 |
| ILMN_1703648 | TMEM82   | -0.12 | 6.66  | -3.58 | 0.0005305 | 0.0031649 | -0.83 |
| ILMN_1758418 | TNFSF13B | 0.28  | 7.39  | 3.58  | 0.0005313 | 0.0031693 | -0.83 |
| ILMN_1700488 | PPARA    | -0.11 | 6.51  | -3.58 | 0.0005317 | 0.0031711 | -0.83 |
| ILMN_1753010 | GATB     | -0.13 | 7.27  | -3.58 | 0.0005333 | 0.0031802 | -0.84 |
| ILMN_1772686 | FGD3     | 0.33  | 7.90  | 3.58  | 0.0005342 | 0.0031848 | -0.84 |
| ILMN_1773696 | RGMB     | -0.09 | 6.47  | -3.58 | 0.0005353 | 0.0031907 | -0.84 |
| ILMN_1719975 | HOXC4    | 0.13  | 6.53  | 3.58  | 0.0005357 | 0.0031923 | -0.84 |
| ILMN_1673409 | NA       | 0.13  | 6.67  | 3.58  | 0.0005395 | 0.0032143 | -0.85 |
| ILMN_2403237 | CHN2     | -0.22 | 7.92  | -3.58 | 0.0005404 | 0.0032193 | -0.85 |
| ILMN_2261600 | NA       | 0.13  | 6.56  | 3.58  | 0.0005432 | 0.0032357 | -0.85 |
| ILMN_2070210 | RNF219   | 0.16  | 8.12  | 3.58  | 0.0005443 | 0.0032414 | -0.85 |
| ILMN_1800602 | GCA      | 0.20  | 8.16  | 3.57  | 0.0005476 | 0.0032608 | -0.86 |
| ILMN_2391355 | STAMBP   | -0.12 | 7.80  | -3.57 | 0.0005479 | 0.0032618 | -0.86 |
| ILMN_1669310 | RHOT2    | -0.17 | 8.19  | -3.57 | 0.0005486 | 0.0032655 | -0.86 |
| ILMN_2367477 | FBXO25   | -0.11 | 6.57  | -3.57 | 0.0005499 | 0.0032725 | -0.86 |
| ILMN_1719616 | DNASE1   | -0.13 | 6.54  | -3.57 | 0.0005509 | 0.0032782 | -0.87 |
| ILMN_1718946 | ADAM10   | -0.19 | 7.93  | -3.57 | 0.0005512 | 0.0032791 | -0.86 |
| ILMN_1775268 | HECW2    | 0.12  | 6.58  | 3.57  | 0.0005536 | 0.0032928 | -0.87 |
| ILMN_2380494 | ANXA11   | -0.13 | 8.22  | -3.57 | 0.0005548 | 0.0032998 | -0.87 |
| ILMN_1651254 | LPP      | 0.22  | 11.63 | 3.57  | 0.0005556 | 0.0033036 | -0.87 |
| ILMN_1665909 | LASP1    | -0.22 | 11.53 | -3.57 | 0.0005564 | 0.0033081 | -0.87 |
| ILMN_1757350 | CTNNB1   | 0.23  | 8.67  | 3.57  | 0.0005574 | 0.0033131 | -0.88 |
| ILMN_2207328 | TPGS2    | 0.21  | 7.23  | 3.57  | 0.00056   | 0.0033279 | -0.88 |
| ILMN_1680436 | NA       | -0.12 | 6.74  | -3.57 | 0.0005606 | 0.0033305 | -0.88 |
| ILMN_1705346 | NBEA     | 0.19  | 6.97  | 3.57  | 0.0005605 | 0.0033305 | -0.88 |
| ILMN_1661809 | PRRG4    | -0.15 | 6.74  | -3.57 | 0.0005607 | 0.0033306 | -0.88 |
| ILMN_1723287 | SLC6A16  | 0.12  | 6.77  | 3.57  | 0.000561  | 0.0033314 | -0.88 |
| ILMN_3247998 | STAP1    | 0.38  | 7.03  | 3.57  | 0.000561  | 0.0033314 | -0.88 |

|              |          |       |       |       |           |           |       |
|--------------|----------|-------|-------|-------|-----------|-----------|-------|
| ILMN_2128623 | NA       | 0.11  | 6.56  | 3.57  | 0.0005612 | 0.0033318 | -0.88 |
| ILMN_1763104 | TRAF4    | -0.13 | 6.85  | -3.57 | 0.0005624 | 0.0033385 | -0.88 |
| ILMN_1658469 | TP53TG1  | -0.15 | 6.95  | -3.57 | 0.0005637 | 0.0033455 | -0.89 |
| ILMN_1810875 | SYNGR1   | 0.10  | 6.40  | 3.57  | 0.0005646 | 0.0033505 | -0.88 |
| ILMN_2104830 | ACP2     | -0.18 | 8.07  | -3.56 | 0.0005659 | 0.0033577 | -0.89 |
| ILMN_1688606 | RNFT1    | -0.16 | 7.22  | -3.56 | 0.0005661 | 0.0033578 | -0.89 |
| ILMN_1748767 | NA       | -0.16 | 11.33 | -3.57 | 0.0005667 | 0.003361  | -0.89 |
| ILMN_1696099 | ALDH4A1  | 0.10  | 6.53  | 3.56  | 0.000568  | 0.0033677 | -0.89 |
| ILMN_2138435 | MRPS27   | 0.15  | 8.43  | 3.56  | 0.000568  | 0.0033677 | -0.89 |
| ILMN_1902467 | NA       | -0.12 | 6.74  | -3.56 | 0.0005682 | 0.0033683 | -0.89 |
| ILMN_1720438 | RPL26L1  | 0.14  | 8.43  | 3.56  | 0.0005694 | 0.0033746 | -0.90 |
| ILMN_3272424 | HNRNPA1  | 0.13  | 6.87  | 3.56  | 0.0005696 | 0.0033754 | -0.90 |
| ILMN_2317658 | SLC3A2   | 0.10  | 6.78  | 3.56  | 0.0005704 | 0.0033793 | -0.90 |
| ILMN_1785095 | ATP6V0E2 | -0.20 | 8.02  | -3.56 | 0.0005707 | 0.003381  | -0.90 |
| ILMN_1651886 | CWF19L1  | 0.13  | 8.77  | 3.56  | 0.0005722 | 0.0033879 | -0.90 |
| ILMN_1705124 | DHRS7C   | -0.09 | 6.45  | -3.56 | 0.0005721 | 0.0033879 | -0.90 |
| ILMN_2183510 | MANF     | 0.26  | 10.28 | 3.56  | 0.0005722 | 0.0033879 | -0.90 |
| ILMN_1720484 | CRTAP    | 0.14  | 6.98  | 3.56  | 0.0005732 | 0.0033932 | -0.90 |
| ILMN_2072045 | SOWAHB   | -0.12 | 6.57  | -3.56 | 0.000575  | 0.003403  | -0.90 |
| ILMN_1666019 | ADNP     | -0.12 | 6.99  | -3.56 | 0.0005752 | 0.0034037 | -0.91 |
| ILMN_1737170 | FLII     | -0.14 | 7.75  | -3.56 | 0.0005762 | 0.0034087 | -0.91 |
| ILMN_3204210 | RPL10    | 0.18  | 13.05 | 3.56  | 0.0005762 | 0.0034087 | -0.91 |
| ILMN_1682264 | DCAF7    | -0.12 | 9.76  | -3.56 | 0.0005786 | 0.003422  | -0.91 |
| ILMN_1742001 | CD160    | -0.16 | 6.56  | -3.56 | 0.0005808 | 0.0034344 | -0.91 |
| ILMN_1713983 | CRYM-AS1 | -0.11 | 6.64  | -3.56 | 0.0005827 | 0.0034446 | -0.92 |
| ILMN_1815107 | MATR3    | 0.12  | 11.12 | 3.56  | 0.0005826 | 0.0034446 | -0.92 |
| ILMN_1775327 | PKM      | 0.19  | 7.71  | 3.56  | 0.0005829 | 0.0034452 | -0.92 |
| ILMN_2374159 | HERPUD1  | 0.39  | 9.82  | 3.55  | 0.0005843 | 0.0034529 | -0.92 |
| ILMN_1663068 | C1orf228 | 0.17  | 6.69  | 3.55  | 0.0005845 | 0.0034537 | -0.92 |
| ILMN_1771084 | ACSM3    | -0.28 | 8.18  | -3.55 | 0.0005859 | 0.0034613 | -0.92 |
| ILMN_1737308 | GLRX     | 0.24  | 10.28 | 3.55  | 0.0005868 | 0.0034661 | -0.92 |
| ILMN_1753008 | REXO1    | -0.13 | 7.12  | -3.55 | 0.0005889 | 0.0034778 | -0.93 |
| ILMN_2235354 | PWWP2B   | -0.13 | 6.69  | -3.55 | 0.0005891 | 0.003478  | -0.93 |
| ILMN_1706238 | CSE1L    | 0.19  | 9.16  | 3.55  | 0.0005904 | 0.0034849 | -0.93 |
| ILMN_2087528 | CPSF3    | 0.15  | 8.87  | 3.55  | 0.0005906 | 0.0034849 | -0.93 |
| ILMN_2398408 | TCEAL1   | 0.17  | 7.00  | 3.55  | 0.0005906 | 0.0034849 | -0.93 |
| ILMN_3238221 | FLJ42627 | -0.23 | 7.17  | -3.55 | 0.0005906 | 0.0034849 | -0.93 |
| ILMN_1696839 | RPS27    | 0.20  | 11.67 | 3.55  | 0.0005914 | 0.0034889 | -0.93 |
| ILMN_1774432 | DTD1     | 0.14  | 7.23  | 3.55  | 0.0005916 | 0.0034895 | -0.93 |
| ILMN_2160005 | NUMA1    | -0.19 | 8.33  | -3.55 | 0.0005924 | 0.0034935 | -0.93 |
| ILMN_1683165 | FAM20C   | 0.11  | 6.41  | 3.55  | 0.0005955 | 0.0035115 | -0.94 |
| ILMN_1730928 | CDK5R1   | 0.16  | 6.74  | 3.55  | 0.0005961 | 0.0035142 | -0.94 |
| ILMN_1716678 | NPC2     | 0.14  | 12.11 | 3.55  | 0.0005969 | 0.0035184 | -0.94 |
| ILMN_1812278 | LY9      | 0.30  | 6.63  | 3.55  | 0.0005977 | 0.0035223 | -0.94 |
| ILMN_3278548 | RPL7     | 0.11  | 6.60  | 3.55  | 0.0005978 | 0.0035226 | -0.94 |
| ILMN_1767414 | NA       | -0.14 | 6.65  | -3.55 | 0.0005981 | 0.0035239 | -0.94 |
| ILMN_1655482 | TRIM27   | 0.11  | 6.90  | 3.55  | 0.0005992 | 0.0035297 | -0.94 |
| ILMN_2113490 | NTN4     | -0.18 | 7.60  | -3.55 | 0.0005995 | 0.0035305 | -0.94 |

|              |          |       |       |       |           |           |       |
|--------------|----------|-------|-------|-------|-----------|-----------|-------|
| ILMN_1898124 | SNHG15   | 0.22  | 7.85  | 3.55  | 0.0006019 | 0.0035444 | -0.95 |
| ILMN_1711493 | PRAM1    | 0.10  | 6.36  | 3.55  | 0.0006028 | 0.0035492 | -0.95 |
| ILMN_1747598 | PPP1R11  | -0.14 | 10.66 | -3.55 | 0.0006037 | 0.0035534 | -0.95 |
| ILMN_2116714 | SLC39A1  | 0.15  | 8.66  | 3.55  | 0.0006044 | 0.003557  | -0.95 |
| ILMN_1786707 | EMC10    | -0.10 | 6.67  | -3.54 | 0.0006054 | 0.0035623 | -0.95 |
| ILMN_2399497 | RFXANK   | -0.14 | 6.93  | -3.54 | 0.0006057 | 0.0035636 | -0.95 |
| ILMN_1708041 | PLEKHF1  | 0.15  | 7.00  | 3.54  | 0.0006062 | 0.0035655 | -0.95 |
| ILMN_3234841 | RPL23AP7 | 0.14  | 12.91 | 3.54  | 0.0006066 | 0.0035677 | -0.96 |
| ILMN_1756572 | COQ2     | 0.18  | 8.82  | 3.54  | 0.0006082 | 0.0035766 | -0.96 |
| ILMN_1753716 | EIF2B1   | -0.10 | 8.06  | -3.54 | 0.0006126 | 0.0036018 | -0.96 |
| ILMN_1680403 | SSR4     | 0.35  | 11.32 | 3.54  | 0.0006132 | 0.0036048 | -0.97 |
| ILMN_1671928 | PROS1    | 0.34  | 9.15  | 3.54  | 0.0006141 | 0.0036094 | -0.97 |
| ILMN_2359211 | AP2A1    | 0.11  | 6.60  | 3.54  | 0.0006145 | 0.0036109 | -0.97 |
| ILMN_1682288 | NA       | -0.21 | 7.75  | -3.54 | 0.0006153 | 0.0036136 | -0.96 |
| ILMN_1689725 | RPLP1    | 0.27  | 8.48  | 3.54  | 0.0006151 | 0.0036136 | -0.96 |
| ILMN_1752802 | CLPTM1L  | -0.21 | 9.17  | -3.54 | 0.0006152 | 0.0036136 | -0.96 |
| ILMN_2382648 | MID2     | 0.14  | 6.45  | 3.54  | 0.0006157 | 0.0036158 | -0.97 |
| ILMN_1772627 | NSG1     | -0.18 | 7.36  | -3.54 | 0.0006179 | 0.0036281 | -0.97 |
| ILMN_1668498 | CWF19L2  | 0.14  | 7.48  | 3.54  | 0.0006185 | 0.0036308 | -0.97 |
| ILMN_2324994 | IKBIP    | 0.11  | 6.63  | 3.54  | 0.000619  | 0.0036332 | -0.97 |
| ILMN_2313730 | RHOC     | -0.20 | 11.60 | -3.54 | 0.0006193 | 0.0036343 | -0.97 |
| ILMN_1712918 | NQO2     | 0.18  | 7.22  | 3.54  | 0.0006196 | 0.0036353 | -0.98 |
| ILMN_1761049 | AGO3     | 0.10  | 6.51  | 3.54  | 0.0006201 | 0.0036375 | -0.98 |
| ILMN_1772316 | SUN1     | -0.19 | 8.80  | -3.54 | 0.0006205 | 0.0036395 | -0.98 |
| ILMN_2399896 | SEC31A   | 0.16  | 9.66  | 3.54  | 0.0006221 | 0.0036479 | -0.98 |
| ILMN_1736834 | SKIL     | 0.11  | 6.64  | 3.54  | 0.0006223 | 0.0036485 | -0.98 |
| ILMN_1748685 | TRIM31   | -0.53 | 9.66  | -3.54 | 0.0006224 | 0.0036486 | -0.98 |
| ILMN_1660938 | TOE1     | -0.11 | 6.78  | -3.54 | 0.0006235 | 0.0036545 | -0.98 |
| ILMN_1683678 | SPATS2L  | -0.25 | 9.65  | -3.53 | 0.0006289 | 0.0036855 | -0.99 |
| ILMN_3297644 | TMEM214  | 0.16  | 7.98  | 3.53  | 0.0006294 | 0.0036881 | -0.99 |
| ILMN_1803073 | DNAJC12  | 0.35  | 7.86  | 3.53  | 0.0006304 | 0.0036933 | -0.99 |
| ILMN_1756139 | NA       | 0.15  | 8.57  | 3.53  | 0.0006306 | 0.0036936 | -0.99 |
| ILMN_1748271 | ATF2     | 0.11  | 6.71  | 3.53  | 0.000632  | 0.0037013 | -0.99 |
| ILMN_1745368 | TMEM50A  | -0.11 | 7.29  | -3.53 | 0.0006324 | 0.003702  | -0.99 |
| ILMN_1781565 | MESDC1   | 0.13  | 6.73  | 3.53  | 0.0006323 | 0.003702  | -0.99 |
| ILMN_3301824 | TSEN15   | 0.12  | 6.85  | 3.53  | 0.000633  | 0.003705  | -0.99 |
| ILMN_1753243 | DNAJB11  | 0.20  | 10.31 | 3.53  | 0.0006342 | 0.0037113 | -1.00 |
| ILMN_1656868 | NA       | -0.25 | 11.58 | -3.53 | 0.0006348 | 0.0037142 | -1.00 |
| ILMN_3244607 | FAM117B  | -0.17 | 7.71  | -3.53 | 0.0006351 | 0.0037155 | -1.00 |
| ILMN_1777487 | ZNF839   | -0.14 | 6.92  | -3.53 | 0.0006354 | 0.0037169 | -1.00 |
| ILMN_1763007 | MFSD14A  | 0.13  | 7.45  | 3.53  | 0.0006366 | 0.0037232 | -1.00 |
| ILMN_1697827 | ATP2A3   | -0.18 | 7.63  | -3.53 | 0.0006375 | 0.0037278 | -1.00 |
| ILMN_1700834 | SLK      | 0.18  | 8.47  | 3.53  | 0.000638  | 0.00373   | -1.00 |
| ILMN_2323933 | LAIR2    | 0.25  | 6.72  | 3.53  | 0.0006387 | 0.0037335 | -1.00 |
| ILMN_1734695 | MAP4     | 0.09  | 6.38  | 3.53  | 0.0006396 | 0.0037383 | -1.01 |
| ILMN_1768035 | MMP12    | 0.72  | 7.69  | 3.53  | 0.0006401 | 0.0037403 | -1.01 |
| ILMN_2408987 | SMARCD3  | 0.09  | 6.41  | 3.52  | 0.0006456 | 0.0037721 | -1.01 |
| ILMN_1774844 | MAPKAPK2 | 0.17  | 8.09  | 3.52  | 0.0006468 | 0.0037779 | -1.02 |

|              |           |       |       |       |           |           |       |
|--------------|-----------|-------|-------|-------|-----------|-----------|-------|
| ILMN_1665583 | TUBB      | 0.24  | 8.45  | 3.52  | 0.0006473 | 0.0037805 | -1.02 |
| ILMN_1835780 | NA        | -0.09 | 6.55  | -3.52 | 0.0006474 | 0.0037805 | -1.02 |
| ILMN_2193233 | MZB1      | 0.54  | 8.64  | 3.52  | 0.0006478 | 0.0037822 | -1.02 |
| ILMN_1794782 | ABCG1     | -0.25 | 8.45  | -3.52 | 0.0006508 | 0.003799  | -1.02 |
| ILMN_1723141 | OTUD1     | 0.15  | 7.69  | 3.52  | 0.0006529 | 0.0038106 | -1.02 |
| ILMN_1763828 | MTF1      | -0.15 | 8.01  | -3.52 | 0.0006533 | 0.0038122 | -1.02 |
| ILMN_1696974 | ANG       | -0.25 | 8.96  | -3.52 | 0.0006552 | 0.0038222 | -1.03 |
| ILMN_1723909 | RPL21P44  | 0.09  | 6.66  | 3.52  | 0.0006551 | 0.0038222 | -1.03 |
| ILMN_1684271 | ACBD6     | 0.12  | 6.88  | 3.52  | 0.0006563 | 0.0038279 | -1.03 |
| ILMN_1797298 | ARMC7     | -0.15 | 7.29  | -3.52 | 0.0006579 | 0.0038364 | -1.03 |
| ILMN_1658628 | LINC00239 | 0.11  | 6.69  | 3.52  | 0.0006593 | 0.0038438 | -1.03 |
| ILMN_1786015 | CTCF      | -0.12 | 7.79  | -3.52 | 0.0006606 | 0.0038509 | -1.04 |
| ILMN_3240370 | UQCC3     | -0.13 | 6.93  | -3.52 | 0.0006611 | 0.0038533 | -1.04 |
| ILMN_1832720 | NA        | 0.11  | 6.51  | 3.52  | 0.000663  | 0.0038639 | -1.04 |
| ILMN_1723004 | CD72      | 0.28  | 6.69  | 3.52  | 0.0006636 | 0.0038668 | -1.04 |
| ILMN_1687440 | HIPK2     | 0.20  | 8.16  | 3.52  | 0.0006639 | 0.0038674 | -1.04 |
| ILMN_1761812 | DMD       | 0.13  | 6.74  | 3.52  | 0.0006641 | 0.0038679 | -1.04 |
| ILMN_2195665 | PANK3     | -0.13 | 7.09  | -3.52 | 0.0006648 | 0.0038714 | -1.04 |
| ILMN_1719661 | MSRB1     | -0.23 | 9.26  | -3.52 | 0.0006652 | 0.0038733 | -1.04 |
| ILMN_1698897 | NLRP9     | -0.11 | 6.59  | -3.52 | 0.0006655 | 0.0038746 | -1.04 |
| ILMN_1763147 | NDUFB6    | -0.15 | 9.05  | -3.51 | 0.0006692 | 0.0038944 | -1.05 |
| ILMN_2366388 | PRDX1     | 0.21  | 11.09 | 3.51  | 0.0006691 | 0.0038944 | -1.05 |
| ILMN_1690708 | SPTBN1    | -0.18 | 7.56  | -3.51 | 0.0006695 | 0.0038959 | -1.05 |
| ILMN_2294976 | ANG       | -0.25 | 8.82  | -3.51 | 0.0006698 | 0.003897  | -1.05 |
| ILMN_2340721 | TMEM134   | -0.16 | 7.90  | -3.51 | 0.0006721 | 0.0039092 | -1.05 |
| ILMN_2343048 | ABCB9     | -0.16 | 7.35  | -3.51 | 0.0006722 | 0.0039095 | -1.05 |
| ILMN_1655340 | RNF181    | 0.12  | 9.04  | 3.51  | 0.0006734 | 0.0039146 | -1.05 |
| ILMN_1747314 | MYO5B     | -0.11 | 6.62  | -3.51 | 0.0006733 | 0.0039146 | -1.05 |
| ILMN_1747800 | LCNL1     | 0.12  | 6.64  | 3.51  | 0.0006733 | 0.0039146 | -1.05 |
| ILMN_2091375 | KRCC1     | -0.21 | 7.74  | -3.51 | 0.0006746 | 0.0039205 | -1.05 |
| ILMN_2353143 | FBLIM1    | -0.16 | 6.95  | -3.51 | 0.0006752 | 0.0039238 | -1.06 |
| ILMN_3298800 | SEC14L1P1 | -0.10 | 6.64  | -3.51 | 0.0006762 | 0.0039284 | -1.06 |
| ILMN_1683817 | UBE2Q2    | 0.19  | 8.39  | 3.51  | 0.0006783 | 0.0039399 | -1.06 |
| ILMN_1775036 | SEC22A    | 0.13  | 8.01  | 3.51  | 0.0006797 | 0.0039476 | -1.06 |
| ILMN_2067890 | CXCL11    | 0.21  | 6.66  | 3.51  | 0.00068   | 0.003949  | -1.06 |
| ILMN_1755862 | PFAS      | 0.14  | 7.82  | 3.51  | 0.0006818 | 0.0039586 | -1.06 |
| ILMN_3182102 | MUC12     | -0.40 | 7.86  | -3.51 | 0.0006832 | 0.003966  | -1.07 |
| ILMN_1813682 | MRPL53    | 0.11  | 7.57  | 3.51  | 0.0006837 | 0.0039682 | -1.07 |
| ILMN_1737650 | DIO2      | 0.18  | 6.75  | 3.51  | 0.0006846 | 0.0039727 | -1.07 |
| ILMN_1793572 | ANKRD20A1 | -0.26 | 7.33  | -3.51 | 0.0006858 | 0.0039788 | -1.07 |
| ILMN_1787511 | THUMPD2   | 0.10  | 7.23  | 3.51  | 0.0006869 | 0.0039847 | -1.07 |
| ILMN_1704398 | FZD9      | 0.15  | 6.50  | 3.51  | 0.0006877 | 0.0039882 | -1.07 |
| ILMN_2197030 | ZFYVE21   | -0.16 | 9.04  | -3.51 | 0.0006877 | 0.0039882 | -1.07 |
| ILMN_1831751 | NA        | 0.12  | 6.51  | 3.51  | 0.0006881 | 0.00399   | -1.07 |
| ILMN_2073592 | CAND2     | 0.12  | 6.69  | 3.51  | 0.0006891 | 0.0039942 | -1.07 |
| ILMN_2199947 | REV3L     | 0.11  | 6.70  | 3.51  | 0.0006891 | 0.0039942 | -1.07 |
| ILMN_3251467 | LRRC58    | 0.17  | 7.61  | 3.50  | 0.0006913 | 0.0040065 | -1.08 |
| ILMN_1708427 | KPNA3     | 0.16  | 8.53  | 3.50  | 0.0006938 | 0.0040197 | -1.08 |

|              |           |       |       |       |           |           |       |
|--------------|-----------|-------|-------|-------|-----------|-----------|-------|
| ILMN_1811188 | BCCIP     | 0.17  | 8.01  | 3.50  | 0.0006939 | 0.0040197 | -1.08 |
| ILMN_2100357 | SMPDL3A   | -0.24 | 7.09  | -3.50 | 0.0006963 | 0.0040335 | -1.08 |
| ILMN_1679217 | FAM110B   | 0.11  | 6.52  | 3.50  | 0.0006995 | 0.0040513 | -1.08 |
| ILMN_2348090 | MRPL55    | 0.11  | 7.41  | 3.50  | 0.0007004 | 0.0040555 | -1.08 |
| ILMN_1651433 | DCK       | 0.22  | 7.76  | 3.50  | 0.0007012 | 0.0040596 | -1.09 |
| ILMN_1694840 | MATN2     | 0.19  | 10.38 | 3.50  | 0.0007019 | 0.004063  | -1.09 |
| ILMN_1734915 | METTL18   | -0.13 | 6.90  | -3.50 | 0.0007031 | 0.0040691 | -1.09 |
| ILMN_1750785 | SYTL1     | 0.14  | 6.77  | 3.50  | 0.0007046 | 0.0040774 | -1.10 |
| ILMN_1810881 | ASB16     | 0.21  | 6.64  | 3.50  | 0.0007049 | 0.0040781 | -1.10 |
| ILMN_3287952 | CDC27     | 0.09  | 6.61  | 3.50  | 0.0007051 | 0.0040788 | -1.10 |
| ILMN_2401730 | C1GALT1C1 | -0.12 | 7.56  | -3.50 | 0.0007053 | 0.0040792 | -1.10 |
| ILMN_1717809 | RNF24     | 0.17  | 7.03  | 3.50  | 0.0007057 | 0.004081  | -1.10 |
| ILMN_1688158 | CYB5R4    | 0.15  | 7.75  | 3.50  | 0.0007064 | 0.0040843 | -1.10 |
| ILMN_1682232 | MIER1     | -0.19 | 8.66  | -3.50 | 0.0007084 | 0.0040949 | -1.10 |
| ILMN_1662799 | GPSM3     | 0.30  | 7.57  | 3.50  | 0.000709  | 0.004098  | -1.10 |
| ILMN_1651788 | MAP3K11   | -0.17 | 7.78  | -3.50 | 0.0007104 | 0.0041049 | -1.10 |
| ILMN_2129715 | COG3      | -0.15 | 7.32  | -3.50 | 0.0007112 | 0.0041093 | -1.10 |
| ILMN_1740512 | TMSB15B   | 0.14  | 7.11  | 3.50  | 0.0007116 | 0.0041109 | -1.10 |
| ILMN_1705111 | FNDC3A    | 0.18  | 7.63  | 3.50  | 0.0007135 | 0.0041212 | -1.11 |
| ILMN_2173524 | FOXD4     | 0.10  | 6.55  | 3.49  | 0.0007137 | 0.0041215 | -1.11 |
| ILMN_1653342 | DUS1L     | -0.13 | 7.48  | -3.49 | 0.0007152 | 0.0041294 | -1.11 |
| ILMN_1725250 | CCDC50    | -0.11 | 6.52  | -3.49 | 0.0007171 | 0.0041394 | -1.11 |
| ILMN_2375319 | RASGRP2   | 0.23  | 6.74  | 3.49  | 0.0007171 | 0.0041394 | -1.11 |
| ILMN_3244526 | TCTN3     | -0.12 | 7.12  | -3.49 | 0.0007176 | 0.0041415 | -1.11 |
| ILMN_1654920 | HNRNPH3   | -0.17 | 8.96  | -3.49 | 0.0007179 | 0.0041426 | -1.11 |
| ILMN_1706990 | ZNF271P   | -0.13 | 7.38  | -3.49 | 0.0007181 | 0.0041429 | -1.11 |
| ILMN_1797604 | CAP1      | 0.15  | 11.95 | 3.49  | 0.0007189 | 0.0041468 | -1.11 |
| ILMN_1678966 | SNRPF     | 0.20  | 9.84  | 3.49  | 0.0007197 | 0.0041507 | -1.12 |
| ILMN_1745423 | UTP3      | 0.17  | 7.35  | 3.49  | 0.0007204 | 0.0041532 | -1.12 |
| ILMN_2393149 | ALOX15B   | 0.10  | 6.68  | 3.49  | 0.0007203 | 0.0041532 | -1.12 |
| ILMN_2331232 | NA        | 0.29  | 6.84  | 3.49  | 0.0007211 | 0.0041567 | -1.12 |
| ILMN_3235803 | AQP7P3    | 0.10  | 6.56  | 3.49  | 0.0007215 | 0.0041581 | -1.12 |
| ILMN_2182148 | CNRIP1    | 0.14  | 6.83  | 3.49  | 0.0007236 | 0.0041696 | -1.12 |
| ILMN_1809208 | CAMSAP3   | -0.14 | 6.77  | -3.49 | 0.0007243 | 0.0041721 | -1.12 |
| ILMN_3225406 | FAM133CP  | 0.10  | 7.54  | 3.49  | 0.0007241 | 0.0041721 | -1.12 |
| ILMN_1809490 | NCKAP5    | -0.12 | 6.71  | -3.49 | 0.0007251 | 0.0041761 | -1.12 |
| ILMN_1746820 | NLRP4     | 0.10  | 6.43  | 3.49  | 0.0007256 | 0.0041784 | -1.12 |
| ILMN_2402416 | DNAJB6    | 0.21  | 8.24  | 3.49  | 0.0007263 | 0.0041815 | -1.12 |
| ILMN_1813314 | HIST1H2BK | -0.22 | 7.76  | -3.49 | 0.0007267 | 0.0041834 | -1.12 |
| ILMN_2281502 | DHRS9     | 0.25  | 7.16  | 3.49  | 0.0007294 | 0.0041981 | -1.13 |
| ILMN_1704795 | MARK3     | 0.11  | 7.14  | 3.49  | 0.0007304 | 0.004203  | -1.13 |
| ILMN_1659564 | SEC61A1   | 0.16  | 10.26 | 3.49  | 0.0007306 | 0.004203  | -1.13 |
| ILMN_1746784 | SLAIN1    | 0.11  | 6.70  | 3.49  | 0.0007305 | 0.004203  | -1.13 |
| ILMN_1808071 | KIF14     | 0.13  | 6.96  | 3.49  | 0.0007321 | 0.004211  | -1.13 |
| ILMN_1757736 | IRX5      | 0.11  | 6.52  | 3.49  | 0.0007343 | 0.0042228 | -1.13 |
| ILMN_2105573 | CCL3L3    | 0.47  | 7.10  | 3.49  | 0.0007355 | 0.0042288 | -1.14 |
| ILMN_1705991 | NA        | -0.16 | 8.02  | -3.49 | 0.0007361 | 0.0042316 | -1.14 |
| ILMN_1804629 | TPK1      | 0.26  | 8.14  | 3.49  | 0.0007365 | 0.0042335 | -1.14 |

|              |           |       |       |       |           |           |       |
|--------------|-----------|-------|-------|-------|-----------|-----------|-------|
| ILMN_2160160 | SNORD36C  | 0.16  | 7.26  | 3.49  | 0.0007368 | 0.0042344 | -1.14 |
| ILMN_1661373 | AGPAT3    | -0.11 | 6.54  | -3.48 | 0.0007378 | 0.0042378 | -1.14 |
| ILMN_1671005 | IRF2BP2   | -0.16 | 7.60  | -3.48 | 0.0007379 | 0.0042378 | -1.14 |
| ILMN_1746257 | DAZAP1    | -0.14 | 8.16  | -3.48 | 0.0007379 | 0.0042378 | -1.14 |
| ILMN_1763198 | STAT6     | -0.17 | 8.18  | -3.49 | 0.0007377 | 0.0042378 | -1.14 |
| ILMN_2073012 | TMEM203   | -0.15 | 8.57  | -3.48 | 0.0007404 | 0.0042515 | -1.14 |
| ILMN_2338452 | SERPINA1  | 0.51  | 9.75  | 3.48  | 0.0007411 | 0.0042547 | -1.14 |
| ILMN_2349600 | BRD8      | -0.16 | 8.35  | -3.48 | 0.0007418 | 0.004258  | -1.14 |
| ILMN_1734317 | DPF2      | 0.13  | 8.11  | 3.48  | 0.0007429 | 0.0042637 | -1.14 |
| ILMN_1687213 | FAM167A   | 0.16  | 6.64  | 3.48  | 0.0007434 | 0.0042659 | -1.15 |
| ILMN_1697363 | C20orf27  | 0.16  | 7.41  | 3.48  | 0.0007446 | 0.0042722 | -1.15 |
| ILMN_1672486 | TCF7L2    | -0.14 | 7.31  | -3.48 | 0.0007471 | 0.0042858 | -1.15 |
| ILMN_1662896 | WDR11     | -0.14 | 7.82  | -3.48 | 0.0007477 | 0.0042883 | -1.15 |
| ILMN_1685339 | TPM1      | -0.22 | 7.79  | -3.48 | 0.0007481 | 0.00429   | -1.15 |
| ILMN_2273331 | CEP112    | 0.08  | 6.42  | 3.48  | 0.0007497 | 0.0042986 | -1.15 |
| ILMN_1714158 | PON2      | -0.20 | 10.03 | -3.48 | 0.00075   | 0.0042994 | -1.15 |
| ILMN_1787461 | RUNX3     | 0.40  | 8.14  | 3.48  | 0.0007511 | 0.0043049 | -1.15 |
| ILMN_1728975 | SCO1      | -0.20 | 9.12  | -3.48 | 0.0007543 | 0.0043228 | -1.16 |
| ILMN_1688534 | EIF2B5    | -0.14 | 8.16  | -3.48 | 0.0007551 | 0.0043257 | -1.16 |
| ILMN_1740960 | MACROD1   | -0.15 | 6.80  | -3.48 | 0.0007551 | 0.0043257 | -1.16 |
| ILMN_1804396 | IRF2BPL   | 0.26  | 8.72  | 3.48  | 0.0007552 | 0.0043257 | -1.16 |
| ILMN_1710668 | LETM1     | -0.13 | 7.04  | -3.48 | 0.0007559 | 0.0043285 | -1.16 |
| ILMN_1813275 | DUSP22    | 0.18  | 9.71  | 3.48  | 0.0007559 | 0.0043285 | -1.16 |
| ILMN_1792078 | RNF114    | -0.15 | 10.47 | -3.48 | 0.0007561 | 0.0043286 | -1.16 |
| ILMN_1795383 | RPUSD3    | -0.12 | 7.73  | -3.48 | 0.0007573 | 0.0043348 | -1.16 |
| ILMN_1671686 | DMTN      | -0.10 | 6.73  | -3.48 | 0.0007583 | 0.0043397 | -1.16 |
| ILMN_1751958 | NSUN5     | -0.15 | 7.82  | -3.48 | 0.0007598 | 0.0043474 | -1.17 |
| ILMN_1709204 | CLEC4A    | 0.18  | 6.97  | 3.47  | 0.0007632 | 0.0043664 | -1.17 |
| ILMN_1691937 | CSH2      | -0.09 | 6.40  | -3.48 | 0.0007634 | 0.0043669 | -1.16 |
| ILMN_2048636 | ME2       | -0.20 | 7.89  | -3.47 | 0.0007637 | 0.0043677 | -1.17 |
| ILMN_1782579 | IMMT      | -0.16 | 9.85  | -3.47 | 0.0007648 | 0.0043736 | -1.17 |
| ILMN_3250972 | REPS2     | -0.17 | 7.24  | -3.47 | 0.000765  | 0.0043738 | -1.17 |
| ILMN_1689585 | C20orf194 | 0.12  | 6.76  | 3.47  | 0.0007652 | 0.0043744 | -1.17 |
| ILMN_1754538 | FAM213A   | -0.26 | 8.07  | -3.47 | 0.0007654 | 0.0043747 | -1.17 |
| ILMN_1721128 | TOMM34    | 0.18  | 8.52  | 3.47  | 0.0007659 | 0.0043767 | -1.17 |
| ILMN_1758323 | ACPP      | 0.18  | 6.83  | 3.47  | 0.0007668 | 0.0043812 | -1.17 |
| ILMN_1722186 | NDUFAF7   | 0.13  | 7.83  | 3.47  | 0.0007672 | 0.0043827 | -1.17 |
| ILMN_1716071 | PAQR3     | 0.15  | 7.45  | 3.47  | 0.0007676 | 0.0043845 | -1.18 |
| ILMN_2381138 | SEH1L     | 0.14  | 7.20  | 3.47  | 0.0007706 | 0.0044008 | -1.18 |
| ILMN_1680109 | COL4A3BP  | -0.13 | 8.36  | -3.47 | 0.0007721 | 0.0044084 | -1.18 |
| ILMN_2388155 | CASP3     | -0.17 | 9.34  | -3.47 | 0.0007737 | 0.0044171 | -1.18 |
| ILMN_1731640 | TMSB15B   | 0.10  | 6.66  | 3.47  | 0.0007759 | 0.004429  | -1.19 |
| ILMN_1671116 | XXYL1     | 0.13  | 7.33  | 3.47  | 0.0007774 | 0.0044361 | -1.19 |
| ILMN_2390453 | BCKDHB    | -0.14 | 7.16  | -3.47 | 0.0007774 | 0.0044361 | -1.19 |
| ILMN_1813423 | NAA60     | -0.17 | 7.89  | -3.47 | 0.0007786 | 0.0044417 | -1.18 |
| ILMN_1794260 | KDM2B     | 0.20  | 9.05  | 3.47  | 0.0007791 | 0.0044438 | -1.19 |
| ILMN_1796589 | TRIP13    | 0.22  | 7.25  | 3.47  | 0.0007792 | 0.0044438 | -1.18 |
| ILMN_1669456 | NME3      | -0.17 | 8.41  | -3.47 | 0.0007799 | 0.0044472 | -1.19 |

|              |            |       |       |       |           |           |       |
|--------------|------------|-------|-------|-------|-----------|-----------|-------|
| ILMN_1741566 | BMP7       | 0.11  | 6.61  | 3.47  | 0.0007812 | 0.0044542 | -1.19 |
| ILMN_1716859 | TDO2       | 0.36  | 7.10  | 3.47  | 0.0007839 | 0.0044687 | -1.19 |
| ILMN_1752582 | RAB5B      | -0.10 | 10.51 | -3.47 | 0.0007858 | 0.0044786 | -1.20 |
| ILMN_3247320 | ENHO       | -0.12 | 6.92  | -3.47 | 0.000788  | 0.0044906 | -1.20 |
| ILMN_1652490 | MANSC1     | -0.21 | 7.45  | -3.47 | 0.0007882 | 0.0044907 | -1.20 |
| ILMN_1690999 | MED23      | -0.15 | 7.98  | -3.46 | 0.000789  | 0.0044948 | -1.20 |
| ILMN_1748538 | ALDH1A2    | 0.30  | 6.88  | 3.46  | 0.0007898 | 0.0044978 | -1.20 |
| ILMN_1764030 | CCL23      | -0.38 | 7.02  | -3.46 | 0.0007898 | 0.0044978 | -1.20 |
| ILMN_1654893 | SCAMP2     | -0.10 | 6.89  | -3.46 | 0.0007922 | 0.0045108 | -1.20 |
| ILMN_1793950 | POTEM      | 0.16  | 7.05  | 3.46  | 0.0007931 | 0.0045147 | -1.21 |
| ILMN_1668863 | LYPD1      | 0.09  | 6.54  | 3.46  | 0.0007946 | 0.0045231 | -1.20 |
| ILMN_2228035 | HS3ST1     | 0.22  | 7.01  | 3.46  | 0.0007955 | 0.0045273 | -1.21 |
| ILMN_1666305 | CDKN3      | 0.24  | 7.42  | 3.46  | 0.0007964 | 0.0045318 | -1.21 |
| ILMN_1721344 | MOB3A      | 0.16  | 7.16  | 3.46  | 0.0007974 | 0.0045362 | -1.21 |
| ILMN_2369580 | NPRL3      | 0.16  | 7.80  | 3.46  | 0.0007975 | 0.0045362 | -1.21 |
| ILMN_2284181 | UGP2       | -0.19 | 6.93  | -3.46 | 0.0007977 | 0.0045366 | -1.21 |
| ILMN_1776151 | OLFML1     | 0.18  | 7.15  | 3.46  | 0.000799  | 0.0045433 | -1.21 |
| ILMN_3176989 | HAUS8      | -0.12 | 6.93  | -3.46 | 0.0007998 | 0.0045464 | -1.21 |
| ILMN_3236239 | LOC1001295 | -0.19 | 7.92  | -3.46 | 0.0007997 | 0.0045464 | -1.21 |
| ILMN_1691559 | ELF2       | 0.14  | 8.33  | 3.46  | 0.0008014 | 0.0045545 | -1.22 |
| ILMN_1680129 | NSUN2      | 0.16  | 9.88  | 3.46  | 0.0008018 | 0.0045558 | -1.22 |
| ILMN_1715832 | PIK3R4     | 0.11  | 6.88  | 3.46  | 0.0008018 | 0.0045558 | -1.22 |
| ILMN_1752510 | FAM13A     | -0.27 | 8.20  | -3.46 | 0.0008029 | 0.0045609 | -1.22 |
| ILMN_1729198 | IGKV1ORY-1 | 0.27  | 6.81  | 3.46  | 0.0008052 | 0.0045734 | -1.21 |
| ILMN_2328224 | MADD       | -0.13 | 6.79  | -3.46 | 0.0008077 | 0.0045869 | -1.22 |
| ILMN_3294339 | LOC1001312 | -0.13 | 6.84  | -3.46 | 0.0008085 | 0.0045907 | -1.22 |
| ILMN_1741032 | HERC3      | -0.14 | 7.17  | -3.46 | 0.0008095 | 0.0045942 | -1.22 |
| ILMN_2121316 | GORAB      | -0.13 | 7.06  | -3.46 | 0.0008095 | 0.0045942 | -1.22 |
| ILMN_3196687 | LINC00261  | 0.42  | 8.07  | 3.46  | 0.0008094 | 0.0045942 | -1.22 |
| ILMN_1737561 | N4BP2L2    | -0.22 | 8.47  | -3.46 | 0.0008105 | 0.0045988 | -1.23 |
| ILMN_1723087 | MDK        | 0.10  | 6.48  | 3.46  | 0.0008127 | 0.0046108 | -1.23 |
| ILMN_1722718 | BMP2       | -0.25 | 8.46  | -3.46 | 0.0008145 | 0.0046201 | -1.23 |
| ILMN_1686573 | DEFB1      | -0.46 | 8.46  | -3.45 | 0.0008149 | 0.0046217 | -1.23 |
| ILMN_2399328 | NELFB      | -0.15 | 7.50  | -3.45 | 0.0008175 | 0.0046353 | -1.23 |
| ILMN_1698213 | RBM3       | 0.23  | 8.11  | 3.45  | 0.000821  | 0.004654  | -1.24 |
| ILMN_2413278 | RPL13      | 0.23  | 8.91  | 3.45  | 0.000821  | 0.004654  | -1.23 |
| ILMN_1692844 | TBC1D19    | 0.12  | 6.78  | 3.45  | 0.0008216 | 0.0046563 | -1.23 |
| ILMN_1652237 | CBR3       | 0.16  | 6.87  | 3.45  | 0.0008226 | 0.0046606 | -1.24 |
| ILMN_1692260 | MAFG       | 0.10  | 6.93  | 3.45  | 0.0008226 | 0.0046606 | -1.24 |
| ILMN_2217513 | GLB1L      | 0.11  | 6.69  | 3.45  | 0.0008228 | 0.004661  | -1.24 |
| ILMN_1699570 | TPD52L2    | 0.13  | 9.43  | 3.45  | 0.0008272 | 0.0046843 | -1.24 |
| ILMN_1767665 | GPX8       | 0.22  | 7.15  | 3.45  | 0.0008271 | 0.0046843 | -1.24 |
| ILMN_1731064 | ADCK3      | -0.24 | 8.12  | -3.45 | 0.0008284 | 0.0046904 | -1.25 |
| ILMN_2077905 | PTGFRN     | 0.16  | 7.90  | 3.45  | 0.0008312 | 0.0047055 | -1.25 |
| ILMN_1753639 | MTAP       | 0.13  | 7.40  | 3.45  | 0.0008325 | 0.0047111 | -1.25 |
| ILMN_1765558 | NPAS2      | 0.18  | 7.15  | 3.45  | 0.0008327 | 0.0047111 | -1.25 |
| ILMN_2052335 | MYOC       | 0.12  | 6.54  | 3.45  | 0.0008326 | 0.0047111 | -1.25 |
| ILMN_2364131 | TTPAL      | 0.16  | 7.64  | 3.45  | 0.0008327 | 0.0047111 | -1.25 |

|              |            |       |       |       |           |           |       |
|--------------|------------|-------|-------|-------|-----------|-----------|-------|
| ILMN_2306540 | PDE9A      | 0.42  | 9.27  | 3.45  | 0.0008344 | 0.00472   | -1.25 |
| ILMN_2230683 | CDCA7L     | -0.12 | 6.95  | -3.45 | 0.0008349 | 0.0047218 | -1.25 |
| ILMN_1661940 | CAMTA1     | 0.10  | 6.70  | 3.45  | 0.0008361 | 0.0047278 | -1.25 |
| ILMN_1740486 | NA         | -0.11 | 6.82  | -3.45 | 0.0008373 | 0.0047325 | -1.26 |
| ILMN_1829989 | ZEB1-AS1   | 0.12  | 6.76  | 3.45  | 0.0008372 | 0.0047325 | -1.26 |
| ILMN_2108938 | FNBP4      | 0.15  | 9.58  | 3.45  | 0.0008373 | 0.0047325 | -1.26 |
| ILMN_1768271 | SMAP1      | -0.20 | 8.18  | -3.45 | 0.0008418 | 0.0047569 | -1.26 |
| ILMN_1746945 | CSMD1      | -0.09 | 6.59  | -3.44 | 0.0008441 | 0.0047694 | -1.26 |
| ILMN_2345353 | LST1       | 0.15  | 6.74  | 3.44  | 0.0008444 | 0.0047701 | -1.26 |
| ILMN_1692077 | MXRA7      | 0.09  | 6.41  | 3.44  | 0.0008447 | 0.0047711 | -1.26 |
| ILMN_1743755 | C6orf226   | 0.08  | 6.55  | 3.44  | 0.0008449 | 0.0047713 | -1.26 |
| ILMN_3214384 | NA         | -0.09 | 6.36  | -3.44 | 0.0008474 | 0.0047844 | -1.27 |
| ILMN_1673544 | TCEANC2    | -0.11 | 6.85  | -3.44 | 0.0008502 | 0.0047994 | -1.27 |
| ILMN_1672287 | MYNN       | -0.11 | 7.71  | -3.44 | 0.0008521 | 0.0048093 | -1.27 |
| ILMN_1725831 | TINCR      | -0.12 | 6.47  | -3.44 | 0.0008539 | 0.0048192 | -1.27 |
| ILMN_1756793 | PAPD7      | 0.14  | 8.12  | 3.44  | 0.0008545 | 0.0048213 | -1.27 |
| ILMN_3230351 | MUC12      | -0.37 | 7.52  | -3.44 | 0.0008573 | 0.0048363 | -1.28 |
| ILMN_1720048 | CCL2       | 0.71  | 8.73  | 3.44  | 0.0008577 | 0.0048382 | -1.28 |
| ILMN_2184231 | CHRD1      | 0.10  | 6.36  | 3.44  | 0.000858  | 0.0048389 | -1.28 |
| ILMN_1735594 | CDC42SE2   | -0.15 | 6.98  | -3.44 | 0.0008592 | 0.0048452 | -1.28 |
| ILMN_1655433 | BCKDHB     | -0.12 | 7.28  | -3.44 | 0.0008596 | 0.0048461 | -1.28 |
| ILMN_2405156 | PLPP2      | -0.14 | 7.22  | -3.44 | 0.0008603 | 0.0048493 | -1.28 |
| ILMN_1702858 | ADHFE1     | -0.21 | 7.25  | -3.44 | 0.0008613 | 0.0048542 | -1.28 |
| ILMN_1726289 | KIAA1551   | 0.25  | 7.76  | 3.44  | 0.0008624 | 0.0048593 | -1.28 |
| ILMN_3307892 | PARVA      | 0.19  | 8.13  | 3.44  | 0.0008625 | 0.0048593 | -1.28 |
| ILMN_1857069 | KIAA1147   | -0.10 | 6.56  | -3.44 | 0.0008653 | 0.0048747 | -1.29 |
| ILMN_1700681 | CD99L2     | 0.13  | 7.24  | 3.44  | 0.0008679 | 0.0048884 | -1.29 |
| ILMN_1718831 | TMEM57     | 0.09  | 6.83  | 3.44  | 0.0008682 | 0.0048892 | -1.29 |
| ILMN_1694923 | PTPN9      | -0.10 | 6.81  | -3.44 | 0.0008691 | 0.0048935 | -1.29 |
| ILMN_1730698 | ODF2       | 0.13  | 7.74  | 3.44  | 0.0008699 | 0.0048971 | -1.29 |
| ILMN_2291954 | SLA        | 0.11  | 6.38  | 3.44  | 0.0008702 | 0.004898  | -1.29 |
| ILMN_1786658 | BOLA3      | -0.18 | 10.05 | -3.43 | 0.0008708 | 0.0049009 | -1.29 |
| ILMN_1673998 | SSTR1      | -0.11 | 6.69  | -3.43 | 0.0008738 | 0.0049166 | -1.30 |
| ILMN_1706426 | DSTN       | 0.16  | 11.04 | 3.43  | 0.0008748 | 0.0049215 | -1.30 |
| ILMN_1691476 | MYLK       | 0.36  | 8.87  | 3.43  | 0.0008766 | 0.0049312 | -1.30 |
| ILMN_1699978 | TMEM255A   | 0.11  | 6.62  | 3.43  | 0.0008768 | 0.0049312 | -1.30 |
| ILMN_2290998 | CCS        | -0.12 | 7.01  | -3.43 | 0.0008772 | 0.0049329 | -1.30 |
| ILMN_2127379 | ST6GALNAC: | 0.13  | 6.86  | 3.43  | 0.000879  | 0.0049418 | -1.30 |
| ILMN_1654429 | PMCH       | 0.17  | 6.84  | 3.43  | 0.0008797 | 0.0049452 | -1.30 |
| ILMN_1703487 | LMO4       | 0.23  | 8.81  | 3.43  | 0.0008808 | 0.0049502 | -1.30 |
| ILMN_2069632 | GTSF1      | 0.13  | 6.64  | 3.43  | 0.0008815 | 0.0049538 | -1.30 |
| ILMN_1673960 | MAT2B      | -0.12 | 6.67  | -3.43 | 0.0008823 | 0.0049573 | -1.30 |
| ILMN_2413527 | VCL        | 0.18  | 7.50  | 3.43  | 0.0008834 | 0.0049626 | -1.31 |
| ILMN_2339627 | COPE       | -0.16 | 8.23  | -3.43 | 0.0008841 | 0.0049658 | -1.31 |
| ILMN_1775542 | FCMR       | 0.49  | 7.66  | 3.43  | 0.0008845 | 0.0049673 | -1.31 |
| ILMN_1669516 | ZSCAN9     | -0.11 | 7.40  | -3.43 | 0.0008852 | 0.0049706 | -1.31 |
| ILMN_1745034 | SLC11A2    | -0.21 | 8.80  | -3.43 | 0.0008858 | 0.0049731 | -1.31 |
| ILMN_1723418 | CEL        | -0.14 | 6.66  | -3.43 | 0.0008864 | 0.0049753 | -1.31 |



|              |           |       |       |       |           |           |       |
|--------------|-----------|-------|-------|-------|-----------|-----------|-------|
| ILMN_2176063 | NA        | 0.11  | 6.41  | 3.43  | 0.0008865 | 0.0049753 | -1.31 |
| ILMN_1705066 | BTBD11    | 0.12  | 6.61  | 3.43  | 0.0008868 | 0.0049759 | -1.31 |
| ILMN_2210199 | NLGN4Y    | 0.11  | 6.49  | 3.43  | 0.0008869 | 0.0049759 | -1.31 |
| ILMN_1697959 | SLC35B4   | 0.13  | 7.08  | 3.43  | 0.0008893 | 0.0049886 | -1.31 |
| ILMN_1787813 | SLC5A3    | -0.12 | 6.79  | -3.43 | 0.0008897 | 0.0049894 | -1.31 |
| ILMN_2304624 | EIF4H     | -0.11 | 10.06 | -3.43 | 0.0008897 | 0.0049894 | -1.31 |
| ILMN_1671092 | SOX17     | 0.12  | 6.38  | 3.43  | 0.0008932 | 0.005008  | -1.32 |
| ILMN_1700448 | SIM2      | 0.13  | 6.76  | 3.43  | 0.0008937 | 0.0050096 | -1.32 |
| ILMN_1789535 | DHDDS     | -0.17 | 7.46  | -3.43 | 0.0008938 | 0.0050096 | -1.32 |
| ILMN_1678032 | NR1H2     | -0.12 | 7.39  | -3.43 | 0.000894  | 0.00501   | -1.32 |
| ILMN_1679614 | SGSM3     | -0.16 | 7.33  | -3.43 | 0.0008972 | 0.005027  | -1.31 |
| ILMN_1747650 | BMP6      | 0.25  | 7.15  | 3.43  | 0.0008975 | 0.0050278 | -1.32 |
| ILMN_1774661 | SNRPB     | 0.20  | 9.57  | 3.43  | 0.0008977 | 0.0050282 | -1.32 |
| ILMN_2067032 | TRAF3IP1  | 0.09  | 6.53  | 3.43  | 0.0008978 | 0.0050282 | -1.32 |
| ILMN_1666022 | TNFRSF10D | -0.12 | 6.76  | -3.43 | 0.0008981 | 0.0050291 | -1.32 |
| ILMN_1807994 | PCNP      | 0.16  | 9.98  | 3.43  | 0.0008985 | 0.0050302 | -1.32 |
| ILMN_1718766 | MT1F      | -0.76 | 9.91  | -3.43 | 0.0008988 | 0.0050309 | -1.32 |
| ILMN_1781085 | STAP1     | 0.21  | 6.70  | 3.42  | 0.000904  | 0.0050596 | -1.33 |
| ILMN_3229770 | SKP1      | -0.17 | 8.59  | -3.42 | 0.0009065 | 0.0050727 | -1.33 |
| ILMN_1720838 | DECR1     | -0.19 | 10.77 | -3.42 | 0.0009105 | 0.0050941 | -1.33 |
| ILMN_1755796 | BEST2     | -0.52 | 8.20  | -3.42 | 0.0009109 | 0.0050957 | -1.33 |
| ILMN_1741440 | SLC35A1   | -0.18 | 10.24 | -3.42 | 0.0009125 | 0.0051039 | -1.33 |
| ILMN_1687827 | ZNF311    | -0.11 | 6.53  | -3.42 | 0.0009136 | 0.0051089 | -1.34 |
| ILMN_3307944 | PHLDB3    | -0.14 | 6.71  | -3.42 | 0.0009144 | 0.0051125 | -1.34 |
| ILMN_3239213 | PIRT      | 0.09  | 6.41  | 3.42  | 0.0009162 | 0.0051221 | -1.34 |
| ILMN_2303955 | FKBP1B    | -0.13 | 6.74  | -3.42 | 0.0009182 | 0.0051325 | -1.34 |
| ILMN_1747673 | RASL10A   | 0.11  | 6.66  | 3.42  | 0.0009206 | 0.0051438 | -1.34 |
| ILMN_1810025 | SLC39A2   | -0.14 | 6.43  | -3.42 | 0.0009204 | 0.0051438 | -1.34 |
| ILMN_1739508 | NA        | 1.07  | 12.60 | 3.42  | 0.0009217 | 0.0051494 | -1.35 |
| ILMN_1767766 | PRDX2     | -0.21 | 9.19  | -3.42 | 0.000922  | 0.0051496 | -1.35 |
| ILMN_2234310 | CPTP      | -0.15 | 6.97  | -3.42 | 0.0009221 | 0.0051496 | -1.35 |
| ILMN_1677404 | RAP2A     | 0.17  | 8.62  | 3.42  | 0.0009248 | 0.0051634 | -1.34 |
| ILMN_3260618 | APIP      | 0.42  | 8.65  | 3.42  | 0.0009248 | 0.0051634 | -1.35 |
| ILMN_1676336 | NCEH1     | -0.22 | 8.30  | -3.42 | 0.0009284 | 0.0051816 | -1.35 |
| ILMN_2323508 | AIF1L     | 0.09  | 6.45  | 3.42  | 0.0009283 | 0.0051816 | -1.35 |
| ILMN_1769734 | NT5C3A    | -0.19 | 8.88  | -3.42 | 0.0009291 | 0.0051839 | -1.35 |
| ILMN_2332990 | DIABLO    | -0.12 | 7.56  | -3.42 | 0.000929  | 0.0051839 | -1.35 |
| ILMN_1688959 | CD27      | 0.31  | 7.38  | 3.41  | 0.0009322 | 0.0051987 | -1.36 |
| ILMN_1718483 | AKR7A3    | -0.20 | 6.99  | -3.41 | 0.0009321 | 0.0051987 | -1.36 |
| ILMN_2145396 | AKR7A3    | -0.35 | 9.88  | -3.41 | 0.0009319 | 0.0051987 | -1.36 |
| ILMN_1792733 | FOXA3     | -0.25 | 8.63  | -3.41 | 0.0009331 | 0.005203  | -1.36 |
| ILMN_2084825 | HBG2      | 0.16  | 6.58  | 3.41  | 0.0009385 | 0.0052324 | -1.36 |
| ILMN_1681975 | OR52N2    | -0.08 | 6.55  | -3.41 | 0.0009394 | 0.0052363 | -1.36 |
| ILMN_1712155 | RPL6      | 0.16  | 12.24 | 3.41  | 0.0009428 | 0.0052544 | -1.37 |
| ILMN_2412624 | TP53I11   | -0.12 | 6.78  | -3.41 | 0.000943  | 0.0052547 | -1.36 |
| ILMN_1813256 | CRIP1     | -0.16 | 7.80  | -3.41 | 0.0009434 | 0.0052563 | -1.37 |
| ILMN_1669981 | BMS1P5    | -0.12 | 6.89  | -3.41 | 0.0009468 | 0.0052734 | -1.37 |
| ILMN_1807833 | HM13      | 0.18  | 7.36  | 3.41  | 0.0009467 | 0.0052734 | -1.37 |

|              |           |       |       |       |           |           |       |
|--------------|-----------|-------|-------|-------|-----------|-----------|-------|
| ILMN_1658356 | PAMR1     | 0.25  | 7.16  | 3.41  | 0.0009486 | 0.0052826 | -1.37 |
| ILMN_1690806 | NA        | -0.20 | 9.04  | -3.41 | 0.0009497 | 0.0052879 | -1.37 |
| ILMN_2395981 | PYHIN1    | 0.17  | 6.95  | 3.41  | 0.0009502 | 0.0052896 | -1.37 |
| ILMN_3242091 | LINC00094 | 0.10  | 6.57  | 3.41  | 0.0009512 | 0.0052943 | -1.37 |
| ILMN_1803564 | YIPF1     | -0.15 | 8.30  | -3.41 | 0.000952  | 0.0052978 | -1.36 |
| ILMN_2049274 | ARHGDIG   | 0.08  | 6.31  | 3.41  | 0.0009536 | 0.0053058 | -1.38 |
| ILMN_3249032 | EPCAM     | -0.32 | 12.48 | -3.41 | 0.0009543 | 0.0053092 | -1.38 |
| ILMN_1658624 | UBXN6     | -0.14 | 7.65  | -3.41 | 0.0009556 | 0.0053153 | -1.38 |
| ILMN_1829768 | NA        | 0.11  | 6.68  | 3.41  | 0.0009559 | 0.0053165 | -1.38 |
| ILMN_1804351 | FZD7      | 0.21  | 7.25  | 3.41  | 0.0009562 | 0.0053172 | -1.38 |
| ILMN_1712455 | RBM4      | -0.13 | 7.47  | -3.41 | 0.0009574 | 0.0053229 | -1.38 |
| ILMN_1751086 | ATL3      | 0.17  | 8.37  | 3.41  | 0.0009594 | 0.0053332 | -1.38 |
| ILMN_1798980 | CAPZB     | 0.14  | 9.32  | 3.41  | 0.0009598 | 0.0053333 | -1.38 |
| ILMN_1813669 | ANKS1A    | 0.15  | 8.86  | 3.41  | 0.0009599 | 0.0053333 | -1.38 |
| ILMN_2093775 | ZNF831    | 0.19  | 6.77  | 3.41  | 0.0009596 | 0.0053333 | -1.38 |
| ILMN_1652549 | DTNA      | 0.10  | 6.52  | 3.40  | 0.0009613 | 0.0053402 | -1.38 |
| ILMN_1766793 | RPP25L    | -0.09 | 6.60  | -3.40 | 0.000965  | 0.0053597 | -1.39 |
| ILMN_2414848 | TBRG4     | -0.15 | 7.29  | -3.40 | 0.0009651 | 0.0053597 | -1.38 |
| ILMN_2323801 | MOCS1     | -0.24 | 7.70  | -3.40 | 0.0009655 | 0.0053611 | -1.38 |
| ILMN_2065606 | TOMM40L   | -0.19 | 7.66  | -3.40 | 0.0009668 | 0.0053674 | -1.39 |
| ILMN_3237632 | NCLN      | -0.18 | 8.81  | -3.40 | 0.0009704 | 0.0053864 | -1.39 |
| ILMN_1787441 | CCDC17    | -0.11 | 6.50  | -3.40 | 0.000971  | 0.005389  | -1.39 |
| ILMN_2072296 | CKS2      | 0.26  | 8.98  | 3.40  | 0.0009719 | 0.0053929 | -1.39 |
| ILMN_1660305 | PDE12     | 0.13  | 7.57  | 3.40  | 0.0009723 | 0.0053936 | -1.39 |
| ILMN_1753790 | ZPR1      | 0.13  | 7.16  | 3.40  | 0.0009723 | 0.0053936 | -1.39 |
| ILMN_1786189 | NIFK      | 0.23  | 8.57  | 3.40  | 0.0009745 | 0.005404  | -1.40 |
| ILMN_1804676 | VAMP4     | 0.12  | 6.79  | 3.40  | 0.0009745 | 0.005404  | -1.39 |
| ILMN_1718063 | LIPA      | 0.51  | 9.84  | 3.40  | 0.0009759 | 0.005411  | -1.40 |
| ILMN_1814221 | NPTX1     | 0.25  | 6.83  | 3.40  | 0.0009839 | 0.0054542 | -1.41 |
| ILMN_3239073 | NA        | 0.21  | 6.72  | 3.40  | 0.0009851 | 0.00546   | -1.41 |
| ILMN_1682957 | PAC SIN3  | 0.09  | 6.44  | 3.40  | 0.0009863 | 0.0054659 | -1.41 |
| ILMN_1775163 | PDE1A     | 0.11  | 6.64  | 3.40  | 0.00099   | 0.0054853 | -1.41 |
| ILMN_3238196 | CYTH4     | 0.21  | 7.16  | 3.40  | 0.0009905 | 0.0054876 | -1.41 |
| ILMN_1690695 | PEX11A    | -0.21 | 7.67  | -3.40 | 0.0009907 | 0.0054878 | -1.41 |
| ILMN_1813517 | DISP2     | -0.16 | 6.78  | -3.40 | 0.000991  | 0.005488  | -1.41 |
| ILMN_3244019 | KANK1     | 0.19  | 7.86  | 3.40  | 0.0009911 | 0.005488  | -1.41 |
| ILMN_3244200 | LINC00965 | 0.10  | 6.59  | 3.40  | 0.0009917 | 0.0054908 | -1.41 |
| ILMN_1762594 | NOD2      | 0.14  | 6.60  | 3.40  | 0.000994  | 0.0055023 | -1.41 |
| ILMN_2203896 | SMAD7     | -0.14 | 7.05  | -3.39 | 0.0009966 | 0.0055158 | -1.41 |
| ILMN_2405756 | VAMP1     | 0.08  | 6.41  | 3.39  | 0.000998  | 0.0055226 | -1.42 |
| ILMN_1753241 | SNTA1     | 0.09  | 6.72  | 3.39  | 0.0010026 | 0.0055472 | -1.42 |
| ILMN_1764361 | DUSP16    | -0.13 | 7.36  | -3.39 | 0.0010085 | 0.0055793 | -1.43 |
| ILMN_1753980 | LRRC37B   | -0.12 | 7.20  | -3.39 | 0.0010114 | 0.0055939 | -1.43 |
| ILMN_1755677 | EMC9      | -0.14 | 7.20  | -3.39 | 0.0010115 | 0.0055939 | -1.43 |
| ILMN_2130525 | TSPAN13   | -0.25 | 8.41  | -3.39 | 0.0010129 | 0.0056005 | -1.43 |
| ILMN_1750052 | NOP14     | 0.13  | 7.19  | 3.39  | 0.0010136 | 0.0056038 | -1.43 |
| ILMN_1750661 | FBXW9     | -0.14 | 7.37  | -3.39 | 0.001015  | 0.0056107 | -1.43 |
| ILMN_1806937 | BABAM1    | -0.12 | 8.64  | -3.39 | 0.0010156 | 0.0056131 | -1.44 |

|              |           |       |       |       |           |           |       |
|--------------|-----------|-------|-------|-------|-----------|-----------|-------|
| ILMN_1651949 | SCYL3     | -0.11 | 6.84  | -3.39 | 0.0010158 | 0.0056134 | -1.44 |
| ILMN_1773847 | DYNC1I2   | 0.18  | 9.42  | 3.39  | 0.0010174 | 0.0056208 | -1.43 |
| ILMN_3234116 | TMA7      | 0.12  | 7.02  | 3.39  | 0.0010175 | 0.0056208 | -1.44 |
| ILMN_2374340 | PLAUR     | 0.35  | 7.59  | 3.39  | 0.0010177 | 0.0056213 | -1.44 |
| ILMN_2401258 | FAM13A    | -0.22 | 7.95  | -3.39 | 0.0010179 | 0.0056213 | -1.43 |
| ILMN_1762134 | ECHDC1    | -0.14 | 6.78  | -3.39 | 0.0010187 | 0.0056248 | -1.44 |
| ILMN_1696339 | ZIC2      | 0.21  | 6.59  | 3.39  | 0.0010195 | 0.005628  | -1.44 |
| ILMN_3246766 | NA        | -0.25 | 10.65 | -3.39 | 0.0010196 | 0.005628  | -1.44 |
| ILMN_1670517 | NA        | -0.16 | 7.34  | -3.39 | 0.0010209 | 0.0056343 | -1.44 |
| ILMN_1729487 | GMPR      | 0.11  | 6.64  | 3.39  | 0.0010231 | 0.0056456 | -1.44 |
| ILMN_1796458 | GABARAPL2 | -0.13 | 10.18 | -3.38 | 0.001026  | 0.0056606 | -1.44 |
| ILMN_2061732 | YRDC      | 0.17  | 8.59  | 3.38  | 0.0010278 | 0.0056692 | -1.45 |
| ILMN_1886493 | HNRNPA2B1 | 0.16  | 9.10  | 3.38  | 0.0010286 | 0.0056729 | -1.45 |
| ILMN_1737517 | RPL29     | 0.17  | 7.26  | 3.38  | 0.0010298 | 0.0056787 | -1.45 |
| ILMN_1734653 | FNDC1     | 0.18  | 6.76  | 3.38  | 0.0010354 | 0.0057085 | -1.45 |
| ILMN_1696601 | VARS      | 0.19  | 8.27  | 3.38  | 0.0010358 | 0.0057102 | -1.45 |
| ILMN_1707925 | ABHD12B   | -0.18 | 6.74  | -3.38 | 0.0010388 | 0.0057257 | -1.46 |
| ILMN_1718265 | ATG5      | -0.14 | 7.66  | -3.38 | 0.0010408 | 0.0057348 | -1.46 |
| ILMN_1757129 | TMEM88    | 0.10  | 6.60  | 3.38  | 0.0010407 | 0.0057348 | -1.46 |
| ILMN_1781419 | C11orf73  | 0.16  | 7.54  | 3.38  | 0.0010414 | 0.0057373 | -1.46 |
| ILMN_1750912 | STXBP6    | 0.20  | 7.62  | 3.38  | 0.0010422 | 0.0057407 | -1.46 |
| ILMN_1743643 | ZXDC      | -0.13 | 6.93  | -3.38 | 0.0010424 | 0.0057408 | -1.46 |
| ILMN_1676745 | ZNF142    | 0.10  | 8.10  | 3.38  | 0.0010459 | 0.0057594 | -1.46 |
| ILMN_2098013 | CETP      | 0.19  | 6.68  | 3.38  | 0.0010464 | 0.0057611 | -1.46 |
| ILMN_1773814 | NA        | 0.11  | 6.68  | 3.38  | 0.0010471 | 0.0057637 | -1.46 |
| ILMN_1770768 | SLAMF1    | 0.20  | 6.73  | 3.38  | 0.0010505 | 0.005782  | -1.47 |
| ILMN_1813131 | KRT8      | -0.33 | 8.16  | -3.38 | 0.001051  | 0.0057836 | -1.47 |
| ILMN_1658175 | GGA1      | -0.09 | 6.52  | -3.38 | 0.0010515 | 0.0057847 | -1.47 |
| ILMN_1806306 | SV2B      | -0.12 | 6.84  | -3.38 | 0.0010515 | 0.0057847 | -1.47 |
| ILMN_2363498 | LSR       | -0.17 | 7.36  | -3.38 | 0.0010525 | 0.0057894 | -1.47 |
| ILMN_1774110 | CHN2      | -0.16 | 7.22  | -3.38 | 0.0010558 | 0.0058062 | -1.47 |
| ILMN_1697710 | IL37      | -0.11 | 6.46  | -3.38 | 0.0010577 | 0.005816  | -1.47 |
| ILMN_2355168 | MGST1     | -0.25 | 9.58  | -3.38 | 0.0010579 | 0.005816  | -1.47 |
| ILMN_1712095 | FOXO4     | -0.19 | 8.78  | -3.38 | 0.0010583 | 0.0058175 | -1.47 |
| ILMN_2124802 | MT1H      | -0.84 | 9.96  | -3.37 | 0.00106   | 0.0058258 | -1.48 |
| ILMN_2081813 | PCSK1     | 0.36  | 6.98  | 3.37  | 0.0010634 | 0.0058436 | -1.47 |
| ILMN_1794085 | PPP6R1    | 0.12  | 7.09  | 3.37  | 0.0010643 | 0.0058476 | -1.48 |
| ILMN_1681670 | SLC25A4   | -0.16 | 7.65  | -3.37 | 0.0010646 | 0.005848  | -1.48 |
| ILMN_3238326 | RNF144A   | -0.19 | 7.85  | -3.37 | 0.0010709 | 0.005882  | -1.48 |
| ILMN_1662161 | TBC1D13   | -0.10 | 7.04  | -3.37 | 0.0010717 | 0.0058856 | -1.49 |
| ILMN_1778991 | NFIB      | 0.18  | 9.81  | 3.37  | 0.0010727 | 0.0058898 | -1.49 |
| ILMN_1782222 | KIAA1033  | 0.11  | 6.78  | 3.37  | 0.0010764 | 0.0059091 | -1.49 |
| ILMN_1844692 | NA        | 0.17  | 8.91  | 3.37  | 0.001079  | 0.0059224 | -1.49 |
| ILMN_3262454 | CTDSP2    | -0.11 | 6.74  | -3.37 | 0.0010799 | 0.0059268 | -1.49 |
| ILMN_1680770 | UBQLN2    | 0.14  | 8.80  | 3.37  | 0.001084  | 0.0059483 | -1.50 |
| ILMN_1678805 | POMT2     | -0.16 | 7.36  | -3.37 | 0.0010854 | 0.0059551 | -1.50 |
| ILMN_1703558 | FHL3      | 0.16  | 6.70  | 3.37  | 0.001086  | 0.0059574 | -1.50 |
| ILMN_1656913 | MDH1      | -0.18 | 10.91 | -3.37 | 0.0010866 | 0.0059587 | -1.50 |

|              |            |       |       |       |           |           |       |
|--------------|------------|-------|-------|-------|-----------|-----------|-------|
| ILMN_3243244 | SNORD80    | 0.10  | 6.75  | 3.37  | 0.0010865 | 0.0059587 | -1.50 |
| ILMN_2363106 | RBM23      | -0.11 | 9.08  | -3.37 | 0.0010889 | 0.0059705 | -1.50 |
| ILMN_2352009 | ACADVL     | -0.27 | 9.33  | -3.37 | 0.0010907 | 0.0059792 | -1.50 |
| ILMN_1806867 | PPM1G      | 0.15  | 10.15 | 3.36  | 0.0010971 | 0.0060135 | -1.51 |
| ILMN_1740171 | DUSP11     | 0.13  | 8.43  | 3.36  | 0.0011015 | 0.0060364 | -1.51 |
| ILMN_3303965 | ZC3H11A    | 0.18  | 9.32  | 3.36  | 0.0011033 | 0.0060455 | -1.51 |
| ILMN_1726879 | PRR15      | -0.16 | 7.16  | -3.36 | 0.0011041 | 0.0060487 | -1.51 |
| ILMN_2358560 | TIAM2      | 0.12  | 6.62  | 3.36  | 0.0011045 | 0.0060499 | -1.51 |
| ILMN_3243573 | NA         | 0.57  | 7.26  | 3.36  | 0.0011058 | 0.006056  | -1.51 |
| ILMN_1690017 | SPINK5     | -0.37 | 7.56  | -3.36 | 0.0011064 | 0.0060576 | -1.51 |
| ILMN_1793743 | DIRC2      | -0.21 | 8.93  | -3.36 | 0.0011063 | 0.0060576 | -1.51 |
| ILMN_1865663 | NA         | -0.15 | 7.03  | -3.36 | 0.0011066 | 0.0060576 | -1.51 |
| ILMN_1790577 | SLC35F2    | -0.17 | 7.76  | -3.36 | 0.0011131 | 0.0060923 | -1.52 |
| ILMN_1671158 | MRPL13     | -0.14 | 9.36  | -3.36 | 0.0011143 | 0.0060981 | -1.52 |
| ILMN_2390609 | ANK3       | -0.16 | 6.96  | -3.36 | 0.0011151 | 0.0061011 | -1.52 |
| ILMN_1805646 | SS18       | 0.17  | 8.76  | 3.36  | 0.0011165 | 0.0061082 | -1.52 |
| ILMN_2345292 | FXYD1      | 0.12  | 6.72  | 3.36  | 0.0011182 | 0.0061162 | -1.52 |
| ILMN_3244803 | RAD54L2    | 0.17  | 7.68  | 3.36  | 0.0011192 | 0.006121  | -1.52 |
| ILMN_1738147 | NES        | 0.12  | 6.85  | 3.36  | 0.0011202 | 0.0061254 | -1.53 |
| ILMN_1770424 | DEFA5      | 1.62  | 9.44  | 3.36  | 0.0011209 | 0.0061284 | -1.53 |
| ILMN_3239775 | TENM4      | 0.12  | 6.63  | 3.36  | 0.0011221 | 0.0061339 | -1.53 |
| ILMN_1782633 | NA         | -0.20 | 9.60  | -3.36 | 0.0011238 | 0.0061421 | -1.53 |
| ILMN_1700888 | ENPP1      | -0.25 | 6.97  | -3.36 | 0.0011253 | 0.0061494 | -1.53 |
| ILMN_1769779 | PTP4A3     | 0.17  | 6.60  | 3.36  | 0.0011255 | 0.0061495 | -1.53 |
| ILMN_1663532 | RIC8B      | -0.12 | 8.04  | -3.36 | 0.0011275 | 0.0061594 | -1.53 |
| ILMN_1742427 | POLR1D     | 0.14  | 7.53  | 3.36  | 0.0011295 | 0.0061688 | -1.53 |
| ILMN_2055523 | CSGALNACT3 | 0.10  | 6.51  | 3.36  | 0.0011297 | 0.0061688 | -1.53 |
| ILMN_2404629 | EFL1       | -0.14 | 7.55  | -3.36 | 0.0011298 | 0.0061688 | -1.53 |
| ILMN_2181060 | CKAP2      | 0.14  | 6.97  | 3.35  | 0.0011338 | 0.0061897 | -1.54 |
| ILMN_2042771 | PTTG1      | 0.35  | 8.60  | 3.35  | 0.0011364 | 0.0062032 | -1.54 |
| ILMN_1675131 | PIH1D1     | -0.11 | 7.37  | -3.35 | 0.0011369 | 0.0062051 | -1.54 |
| ILMN_1678233 | CHRD1      | 0.10  | 6.47  | 3.35  | 0.0011391 | 0.0062151 | -1.54 |
| ILMN_2387553 | PSMA3      | 0.18  | 9.56  | 3.35  | 0.0011391 | 0.0062151 | -1.54 |
| ILMN_1654851 | FAM134A    | -0.17 | 7.57  | -3.35 | 0.0011442 | 0.0062419 | -1.55 |
| ILMN_1655952 | WASH1      | -0.18 | 10.60 | -3.35 | 0.001146  | 0.0062502 | -1.55 |
| ILMN_1716816 | TMEM87A    | -0.14 | 10.88 | -3.35 | 0.0011461 | 0.0062502 | -1.55 |
| ILMN_2079285 | ATP5L      | -0.14 | 8.66  | -3.35 | 0.001147  | 0.0062538 | -1.54 |
| ILMN_3198367 | SMS        | 0.13  | 8.75  | 3.35  | 0.0011476 | 0.0062562 | -1.55 |
| ILMN_2338116 | TRAF5      | 0.13  | 6.88  | 3.35  | 0.001153  | 0.0062846 | -1.55 |
| ILMN_1802316 | SMPD3      | -0.19 | 6.98  | -3.35 | 0.0011532 | 0.0062849 | -1.55 |
| ILMN_3307863 | TAOK3      | -0.12 | 7.26  | -3.35 | 0.0011548 | 0.0062924 | -1.55 |
| ILMN_1696532 | RBBP5      | -0.12 | 7.20  | -3.35 | 0.0011553 | 0.0062941 | -1.55 |
| ILMN_1776080 | GTPBP6     | -0.14 | 9.59  | -3.35 | 0.0011576 | 0.0063055 | -1.56 |
| ILMN_3309945 | MIR409     | -0.08 | 6.32  | -3.35 | 0.0011577 | 0.0063055 | -1.56 |
| ILMN_3247728 | RNF115     | 0.13  | 7.23  | 3.35  | 0.001158  | 0.006306  | -1.56 |
| ILMN_1771523 | PRKACB     | -0.10 | 6.93  | -3.35 | 0.0011582 | 0.0063061 | -1.56 |
| ILMN_1668865 | SLC2A14    | 0.16  | 6.44  | 3.35  | 0.0011621 | 0.0063265 | -1.56 |
| ILMN_1808078 | ADGRG7     | -0.36 | 7.46  | -3.35 | 0.0011632 | 0.0063314 | -1.56 |

|              |          |       |       |       |           |           |       |
|--------------|----------|-------|-------|-------|-----------|-----------|-------|
| ILMN_1727992 | FEZ1     | 0.10  | 6.38  | 3.35  | 0.0011655 | 0.0063426 | -1.56 |
| ILMN_1652314 | SPAG1    | -0.11 | 6.62  | -3.34 | 0.0011676 | 0.0063534 | -1.56 |
| ILMN_1733259 | TMIGD3   | 0.30  | 7.03  | 3.34  | 0.0011682 | 0.0063555 | -1.57 |
| ILMN_1740917 | SCNN1B   | -0.64 | 8.36  | -3.34 | 0.001169  | 0.006359  | -1.57 |
| ILMN_2219131 | RPS15    | 0.12  | 6.83  | 3.34  | 0.0011695 | 0.0063605 | -1.57 |
| ILMN_1749738 | NECAB3   | -0.11 | 6.74  | -3.35 | 0.0011704 | 0.0063646 | -1.56 |
| ILMN_2338997 | PTP4A2   | -0.14 | 11.64 | -3.34 | 0.0011734 | 0.0063797 | -1.57 |
| ILMN_1813230 | WSCD2    | -0.09 | 6.38  | -3.34 | 0.0011758 | 0.0063916 | -1.57 |
| ILMN_1710738 | RC3H2    | 0.12  | 7.69  | 3.34  | 0.0011773 | 0.0063991 | -1.57 |
| ILMN_1747217 | C15orf41 | 0.10  | 6.59  | 3.34  | 0.0011786 | 0.0064048 | -1.57 |
| ILMN_2241953 | PILRA    | 0.09  | 6.46  | 3.34  | 0.0011843 | 0.0064347 | -1.58 |
| ILMN_1680018 | RIPK4    | -0.16 | 7.15  | -3.34 | 0.0011847 | 0.0064363 | -1.58 |
| ILMN_2320853 | UBE2D3   | 0.15  | 10.56 | 3.34  | 0.0011888 | 0.0064571 | -1.58 |
| ILMN_1802338 | HHLA3    | -0.10 | 6.55  | -3.34 | 0.001189  | 0.0064575 | -1.58 |
| ILMN_2367530 | ZNF280D  | 0.09  | 6.74  | 3.34  | 0.0011913 | 0.0064691 | -1.58 |
| ILMN_1781135 | STAM2    | -0.14 | 7.38  | -3.34 | 0.0011925 | 0.0064747 | -1.58 |
| ILMN_1720344 | NIPA2    | -0.15 | 9.76  | -3.34 | 0.0011944 | 0.0064839 | -1.59 |
| ILMN_1670096 | NRBP1    | 0.09  | 6.98  | 3.34  | 0.001196  | 0.0064914 | -1.59 |
| ILMN_3307664 | HMG2P46  | -0.11 | 6.52  | -3.34 | 0.0011964 | 0.0064926 | -1.59 |
| ILMN_1769694 | ASIC1    | 0.09  | 6.53  | 3.34  | 0.0011976 | 0.0064969 | -1.59 |
| ILMN_2367233 | ZNF654   | -0.11 | 6.90  | -3.34 | 0.0011974 | 0.0064969 | -1.58 |
| ILMN_1761782 | RAMP3    | 0.13  | 6.86  | 3.34  | 0.0011978 | 0.0064969 | -1.59 |
| ILMN_2278850 | RAB24    | -0.09 | 6.66  | -3.34 | 0.0011995 | 0.0065053 | -1.59 |
| ILMN_1777322 | FAM91A1  | 0.12  | 7.00  | 3.34  | 0.0011998 | 0.0065057 | -1.59 |
| ILMN_1790354 | RABGGTB  | 0.13  | 9.09  | 3.34  | 0.0012003 | 0.0065075 | -1.59 |
| ILMN_1711311 | PODXL    | 0.10  | 6.66  | 3.34  | 0.0012035 | 0.0065241 | -1.59 |
| ILMN_2081883 | IQCK     | -0.13 | 8.08  | -3.33 | 0.0012131 | 0.0065747 | -1.60 |
| ILMN_1779536 | KIZ      | 0.11  | 6.71  | 3.33  | 0.001215  | 0.0065839 | -1.60 |
| ILMN_1739054 | CCDC121  | -0.12 | 6.75  | -3.33 | 0.0012157 | 0.0065869 | -1.60 |
| ILMN_3307654 | MIPOL1   | 0.09  | 6.63  | 3.33  | 0.0012169 | 0.0065921 | -1.60 |
| ILMN_1810729 | UBL3     | -0.18 | 9.16  | -3.33 | 0.0012222 | 0.0066202 | -1.61 |
| ILMN_2157544 | GBF1     | -0.13 | 7.41  | -3.33 | 0.0012245 | 0.0066312 | -1.61 |
| ILMN_1713835 | ENHO     | -0.13 | 6.54  | -3.33 | 0.0012253 | 0.0066345 | -1.61 |
| ILMN_2179018 | NDUFAB1  | -0.15 | 10.09 | -3.33 | 0.0012261 | 0.0066378 | -1.61 |
| ILMN_2160718 | DNHD1    | 0.08  | 6.52  | 3.33  | 0.0012267 | 0.0066402 | -1.61 |
| ILMN_2043918 | DLEU1    | -0.16 | 7.29  | -3.33 | 0.001227  | 0.0066409 | -1.61 |
| ILMN_2096985 | ALDH6A1  | -0.17 | 7.17  | -3.33 | 0.0012283 | 0.0066466 | -1.61 |
| ILMN_1702526 | ADPRM    | 0.11  | 6.99  | 3.33  | 0.00123   | 0.0066551 | -1.61 |
| ILMN_1668277 | BLK      | 0.30  | 6.81  | 3.33  | 0.0012315 | 0.006662  | -1.61 |
| ILMN_1688622 | UBQLN1   | 0.11  | 9.54  | 3.33  | 0.0012325 | 0.0066662 | -1.61 |
| ILMN_3224952 | RPS16    | 0.15  | 12.78 | 3.33  | 0.0012358 | 0.0066834 | -1.62 |
| ILMN_2397231 | USP16    | 0.12  | 9.04  | 3.33  | 0.001239  | 0.0066994 | -1.62 |
| ILMN_1663381 | TRAF3IP2 | -0.12 | 6.63  | -3.33 | 0.0012398 | 0.0067025 | -1.62 |
| ILMN_1725612 | NUP50    | 0.13  | 7.08  | 3.33  | 0.0012426 | 0.0067166 | -1.62 |
| ILMN_1674780 | SF3B1    | 0.13  | 6.91  | 3.33  | 0.0012431 | 0.0067183 | -1.62 |
| ILMN_1719039 | UBE2G1   | 0.12  | 8.21  | 3.32  | 0.0012458 | 0.0067322 | -1.62 |
| ILMN_1660864 | RHBDL1   | -0.10 | 6.61  | -3.33 | 0.0012461 | 0.0067327 | -1.62 |
| ILMN_1771835 | NUP54    | 0.13  | 7.28  | 3.32  | 0.0012506 | 0.0067556 | -1.63 |

|              |          |       |       |       |           |           |       |
|--------------|----------|-------|-------|-------|-----------|-----------|-------|
| ILMN_1699552 | PDZRN3   | 0.13  | 6.61  | 3.32  | 0.0012539 | 0.0067728 | -1.63 |
| ILMN_1810335 | DGKB     | 0.12  | 6.42  | 3.32  | 0.0012546 | 0.006775  | -1.63 |
| ILMN_2080080 | MAP7D2   | -0.11 | 6.46  | -3.32 | 0.0012549 | 0.006775  | -1.63 |
| ILMN_3238662 | SNORD89  | 0.16  | 7.47  | 3.32  | 0.0012548 | 0.006775  | -1.63 |
| ILMN_2311761 | AP3S1    | 0.18  | 8.68  | 3.32  | 0.0012564 | 0.0067816 | -1.63 |
| ILMN_1719518 | ARF4     | 0.15  | 11.39 | 3.32  | 0.0012566 | 0.0067821 | -1.63 |
| ILMN_3239621 | SNRNP27  | 0.16  | 8.07  | 3.32  | 0.0012584 | 0.0067906 | -1.63 |
| ILMN_1667476 | LTBR     | 0.19  | 8.50  | 3.32  | 0.0012587 | 0.0067911 | -1.63 |
| ILMN_1707815 | NA       | -0.16 | 7.28  | -3.32 | 0.0012639 | 0.0068183 | -1.64 |
| ILMN_1798620 | PQLC1    | -0.20 | 10.14 | -3.32 | 0.0012645 | 0.0068193 | -1.64 |
| ILMN_2359789 | RAC1     | -0.14 | 11.47 | -3.32 | 0.0012645 | 0.0068193 | -1.64 |
| ILMN_1712236 | PPP1R3B  | -0.10 | 6.64  | -3.32 | 0.0012656 | 0.0068243 | -1.64 |
| ILMN_2121207 | MVB12A   | -0.17 | 8.15  | -3.32 | 0.0012661 | 0.0068255 | -1.64 |
| ILMN_1681668 | GGA1     | -0.08 | 6.42  | -3.32 | 0.0012676 | 0.0068315 | -1.64 |
| ILMN_1765258 | HLA-E    | 0.23  | 11.07 | 3.32  | 0.0012675 | 0.0068315 | -1.64 |
| ILMN_2385178 | MIB2     | -0.17 | 7.37  | -3.32 | 0.0012688 | 0.0068368 | -1.64 |
| ILMN_2243912 | RAB37    | -0.12 | 6.85  | -3.32 | 0.0012711 | 0.0068473 | -1.64 |
| ILMN_3222974 | PRKCB    | 0.12  | 6.74  | 3.32  | 0.0012711 | 0.0068473 | -1.64 |
| ILMN_1664016 | ARHGEF18 | -0.20 | 10.20 | -3.32 | 0.0012727 | 0.0068549 | -1.64 |
| ILMN_2148944 | ADCY4    | 0.20  | 7.68  | 3.32  | 0.001276  | 0.0068716 | -1.65 |
| ILMN_2411282 | QSOX1    | -0.25 | 9.75  | -3.32 | 0.0012785 | 0.0068839 | -1.65 |
| ILMN_2388466 | TIA1     | -0.14 | 8.75  | -3.32 | 0.001281  | 0.0068965 | -1.65 |
| ILMN_1755883 | RPS27A   | 0.22  | 11.93 | 3.32  | 0.0012828 | 0.006905  | -1.65 |
| ILMN_1745343 | ZMAT2    | -0.13 | 8.33  | -3.32 | 0.0012834 | 0.0069068 | -1.65 |
| ILMN_1693862 | C8orf82  | -0.14 | 7.18  | -3.32 | 0.0012852 | 0.0069136 | -1.65 |
| ILMN_1798804 | SRPK1    | -0.13 | 9.57  | -3.32 | 0.001285  | 0.0069136 | -1.65 |
| ILMN_2326953 | LAT2     | 0.20  | 6.84  | 3.32  | 0.0012852 | 0.0069136 | -1.65 |
| ILMN_2189605 | FAM122B  | -0.13 | 8.08  | -3.31 | 0.0012861 | 0.0069172 | -1.65 |
| ILMN_1661173 | TRIP4    | -0.14 | 7.86  | -3.31 | 0.0012909 | 0.0069422 | -1.66 |
| ILMN_1656676 | ZYG11B   | -0.20 | 9.68  | -3.31 | 0.0012918 | 0.0069458 | -1.66 |
| ILMN_1658483 | IL1A     | 0.23  | 6.53  | 3.31  | 0.001295  | 0.0069616 | -1.65 |
| ILMN_1724907 | NA       | 0.13  | 7.60  | 3.31  | 0.0012984 | 0.0069791 | -1.66 |
| ILMN_1695829 | TTYH2    | 0.10  | 6.43  | 3.31  | 0.0013001 | 0.0069872 | -1.66 |
| ILMN_1753745 | HDCC2    | 0.15  | 10.05 | 3.31  | 0.0013004 | 0.0069874 | -1.66 |
| ILMN_3237503 | RNF207   | -0.13 | 6.80  | -3.31 | 0.0013019 | 0.0069948 | -1.67 |
| ILMN_2168314 | PGM3     | 0.13  | 7.31  | 3.31  | 0.0013023 | 0.0069959 | -1.67 |
| ILMN_1741971 | KIAA1161 | -0.14 | 6.80  | -3.31 | 0.0013026 | 0.006996  | -1.66 |
| ILMN_1759954 | PTMA     | 0.30  | 8.17  | 3.31  | 0.0013089 | 0.0070289 | -1.67 |
| ILMN_1714691 | HOXD10   | -0.23 | 6.70  | -3.31 | 0.0013102 | 0.0070349 | -1.67 |
| ILMN_1662340 | ZNF358   | -0.17 | 8.35  | -3.31 | 0.0013105 | 0.0070355 | -1.67 |
| ILMN_1742981 | TUBA1A   | 0.27  | 9.51  | 3.31  | 0.0013121 | 0.0070427 | -1.67 |
| ILMN_1746029 | SPATS2   | 0.13  | 7.32  | 3.31  | 0.0013143 | 0.0070537 | -1.67 |
| ILMN_1691499 | TJP1     | -0.20 | 9.08  | -3.31 | 0.0013169 | 0.0070665 | -1.68 |
| ILMN_1673320 | CCDC178  | 0.13  | 6.64  | 3.31  | 0.0013174 | 0.0070682 | -1.68 |
| ILMN_1742224 | SLTM     | -0.10 | 8.98  | -3.31 | 0.001319  | 0.0070752 | -1.68 |
| ILMN_1710697 | BUD31    | -0.11 | 9.63  | -3.31 | 0.0013248 | 0.0071052 | -1.68 |
| ILMN_3307700 | SPCS3    | 0.24  | 8.05  | 3.31  | 0.0013252 | 0.0071063 | -1.68 |
| ILMN_1651902 | RASL11A  | -0.18 | 7.15  | -3.31 | 0.0013267 | 0.0071135 | -1.68 |

|              |           |       |       |       |           |           |       |
|--------------|-----------|-------|-------|-------|-----------|-----------|-------|
| ILMN_3209832 | PET100    | -0.13 | 10.64 | -3.31 | 0.0013272 | 0.0071152 | -1.68 |
| ILMN_1738263 | PIGU      | -0.13 | 7.94  | -3.30 | 0.0013295 | 0.0071262 | -1.68 |
| ILMN_1708016 | FAM210B   | 0.16  | 8.07  | 3.30  | 0.0013317 | 0.0071365 | -1.69 |
| ILMN_1813389 | MRPS7     | -0.14 | 8.12  | -3.30 | 0.0013318 | 0.0071365 | -1.69 |
| ILMN_1787275 | STAG3     | 0.12  | 6.52  | 3.30  | 0.0013339 | 0.0071452 | -1.69 |
| ILMN_2400874 | SCYL1     | 0.13  | 9.26  | 3.31  | 0.0013337 | 0.0071452 | -1.68 |
| ILMN_1766200 | CALHM2    | 0.11  | 6.94  | 3.30  | 0.0013403 | 0.0071784 | -1.69 |
| ILMN_1736792 | PLEC      | -0.08 | 6.46  | -3.30 | 0.0013467 | 0.0072116 | -1.70 |
| ILMN_1684034 | STAT5B    | 0.13  | 7.27  | 3.30  | 0.0013486 | 0.0072208 | -1.70 |
| ILMN_3241254 | HAS2-AS1  | -0.11 | 6.66  | -3.30 | 0.0013538 | 0.0072477 | -1.70 |
| ILMN_3250243 | METTL21A  | 0.13  | 6.98  | 3.30  | 0.0013578 | 0.0072679 | -1.70 |
| ILMN_2326512 | CASP1     | 0.30  | 9.01  | 3.30  | 0.0013589 | 0.0072723 | -1.71 |
| ILMN_1804419 | LRMP      | 0.44  | 7.71  | 3.30  | 0.0013612 | 0.0072839 | -1.71 |
| ILMN_1727043 | COLGALT1  | 0.15  | 8.86  | 3.30  | 0.0013623 | 0.0072884 | -1.71 |
| ILMN_2296057 | CASP2     | -0.09 | 6.35  | -3.30 | 0.0013633 | 0.0072925 | -1.71 |
| ILMN_2173291 | CYP4B1    | 0.12  | 6.49  | 3.30  | 0.0013642 | 0.0072963 | -1.71 |
| ILMN_1718852 | PLCL1     | 0.12  | 6.57  | 3.30  | 0.0013656 | 0.0073026 | -1.71 |
| ILMN_1721540 | NWD1      | -0.10 | 6.37  | -3.30 | 0.0013667 | 0.0073076 | -1.71 |
| ILMN_1791097 | RSBN1     | -0.14 | 8.55  | -3.30 | 0.0013679 | 0.0073127 | -1.71 |
| ILMN_1726755 | COPS4     | 0.13  | 8.28  | 3.30  | 0.0013691 | 0.0073181 | -1.71 |
| ILMN_3248379 | ROCK1P1   | 0.15  | 7.25  | 3.29  | 0.0013714 | 0.0073294 | -1.71 |
| ILMN_1696757 | TTC14     | -0.14 | 8.06  | -3.29 | 0.0013721 | 0.0073319 | -1.71 |
| ILMN_1698680 | ARL17A    | 0.20  | 6.86  | 3.29  | 0.0013738 | 0.0073398 | -1.72 |
| ILMN_2131861 | SOCS2     | 0.21  | 8.90  | 3.29  | 0.0013776 | 0.0073588 | -1.71 |
| ILMN_1740622 | TRPM3     | -0.08 | 6.32  | -3.29 | 0.0013781 | 0.0073603 | -1.72 |
| ILMN_1693421 | RPN2      | 0.17  | 8.59  | 3.29  | 0.0013815 | 0.0073772 | -1.72 |
| ILMN_1800172 | RILP      | -0.09 | 6.51  | -3.29 | 0.0013833 | 0.0073861 | -1.72 |
| ILMN_2374865 | ATF3      | 0.53  | 8.40  | 3.29  | 0.0013867 | 0.0074028 | -1.72 |
| ILMN_1731412 | UBTD2     | -0.09 | 6.92  | -3.29 | 0.0013906 | 0.0074223 | -1.73 |
| ILMN_1729915 | PILRA     | 0.08  | 6.40  | 3.29  | 0.0013908 | 0.0074226 | -1.73 |
| ILMN_1744295 | CDKN2A    | 0.12  | 6.40  | 3.29  | 0.0013935 | 0.0074357 | -1.73 |
| ILMN_1785528 | NA        | -0.23 | 8.62  | -3.29 | 0.0013953 | 0.0074444 | -1.73 |
| ILMN_1705114 | NUMB      | -0.13 | 9.33  | -3.29 | 0.0013976 | 0.0074552 | -1.73 |
| ILMN_2038777 | ACTB      | 0.28  | 12.83 | 3.29  | 0.0013987 | 0.00746   | -1.73 |
| ILMN_1765146 | IFNAR2    | 0.25  | 7.34  | 3.29  | 0.0014035 | 0.0074843 | -1.74 |
| ILMN_1771629 | SDR39U1   | -0.11 | 6.63  | -3.29 | 0.0014039 | 0.0074857 | -1.74 |
| ILMN_3247452 | OST4      | 0.17  | 10.98 | 3.29  | 0.0014047 | 0.0074888 | -1.74 |
| ILMN_2258774 | MRPL43    | -0.14 | 8.91  | -3.29 | 0.0014053 | 0.0074896 | -1.73 |
| ILMN_2411264 | BTBD1     | 0.16  | 8.41  | 3.29  | 0.0014051 | 0.0074896 | -1.74 |
| ILMN_1741175 | RAB11FIP2 | 0.16  | 7.34  | 3.29  | 0.0014068 | 0.0074962 | -1.74 |
| ILMN_2320391 | SLC45A2   | -0.09 | 6.48  | -3.29 | 0.0014076 | 0.0074993 | -1.74 |
| ILMN_3251137 | METTL21A  | 0.13  | 6.83  | 3.29  | 0.0014107 | 0.0075147 | -1.74 |
| ILMN_1673638 | RPS3A     | 0.11  | 12.46 | 3.29  | 0.001412  | 0.0075207 | -1.74 |
| ILMN_1693620 | PGM3      | 0.19  | 7.97  | 3.29  | 0.0014136 | 0.0075267 | -1.74 |
| ILMN_1778917 | CDK7      | 0.11  | 8.52  | 3.29  | 0.0014136 | 0.0075267 | -1.74 |
| ILMN_2353936 | IL37      | -0.10 | 6.37  | -3.28 | 0.0014193 | 0.0075561 | -1.75 |
| ILMN_3242448 | SNORA11D  | 0.12  | 6.84  | 3.28  | 0.0014203 | 0.0075599 | -1.74 |
| ILMN_1773645 | GMPPB     | -0.13 | 7.25  | -3.28 | 0.0014243 | 0.0075801 | -1.75 |

|              |           |       |       |       |           |           |       |
|--------------|-----------|-------|-------|-------|-----------|-----------|-------|
| ILMN_1660964 | NA        | -0.10 | 6.53  | -3.28 | 0.0014279 | 0.0075981 | -1.75 |
| ILMN_1766542 | NA        | -0.11 | 6.71  | -3.28 | 0.0014282 | 0.0075987 | -1.75 |
| ILMN_1694075 | GADD45A   | 0.18  | 7.43  | 3.28  | 0.0014296 | 0.0076049 | -1.75 |
| ILMN_1796710 | PHC1      | 0.11  | 6.81  | 3.28  | 0.0014314 | 0.0076135 | -1.75 |
| ILMN_1692760 | DPAGT1    | 0.13  | 9.06  | 3.28  | 0.001432  | 0.0076153 | -1.75 |
| ILMN_1797184 | PKN3      | 0.10  | 6.62  | 3.28  | 0.0014322 | 0.0076153 | -1.75 |
| ILMN_1793349 | MOB1B     | 0.16  | 6.98  | 3.28  | 0.0014356 | 0.0076323 | -1.74 |
| ILMN_1784756 | ACOT7     | 0.10  | 6.36  | 3.28  | 0.0014369 | 0.0076378 | -1.75 |
| ILMN_1812312 | NDUFS4    | -0.16 | 10.22 | -3.28 | 0.0014384 | 0.0076447 | -1.75 |
| ILMN_2366246 | SEC23B    | 0.19  | 8.99  | 3.28  | 0.0014397 | 0.0076505 | -1.76 |
| ILMN_1815102 | LCAT      | 0.09  | 6.54  | 3.28  | 0.0014416 | 0.0076591 | -1.76 |
| ILMN_1764980 | SERPINA1  | 0.16  | 6.55  | 3.28  | 0.0014455 | 0.0076788 | -1.76 |
| ILMN_3238613 | SNORA26   | 0.09  | 6.63  | 3.28  | 0.0014492 | 0.0076975 | -1.76 |
| ILMN_1703153 | GLYR1     | -0.10 | 8.30  | -3.28 | 0.0014521 | 0.0077116 | -1.77 |
| ILMN_2233438 | SPATA31D1 | -0.08 | 6.28  | -3.28 | 0.0014535 | 0.0077179 | -1.77 |
| ILMN_2390416 | BAG6      | -0.14 | 7.95  | -3.28 | 0.0014542 | 0.0077203 | -1.77 |
| ILMN_2349138 | CDC42SE1  | 0.23  | 7.92  | 3.28  | 0.0014565 | 0.0077314 | -1.77 |
| ILMN_1789828 | VPS13A    | -0.11 | 6.82  | -3.28 | 0.0014587 | 0.0077415 | -1.77 |
| ILMN_1777915 | STX6      | 0.09  | 7.87  | 3.28  | 0.0014609 | 0.0077523 | -1.77 |
| ILMN_1651817 | GRIK1     | 0.10  | 6.55  | 3.27  | 0.001462  | 0.007757  | -1.77 |
| ILMN_1680246 | MAT2B     | -0.20 | 7.16  | -3.28 | 0.0014638 | 0.0077654 | -1.77 |
| ILMN_1710064 | SDR16C5   | 0.20  | 6.98  | 3.27  | 0.0014671 | 0.0077814 | -1.78 |
| ILMN_1721354 | KRT6B     | 0.20  | 6.49  | 3.27  | 0.0014695 | 0.0077928 | -1.78 |
| ILMN_1682987 | PDZRN4    | 0.13  | 6.51  | 3.27  | 0.0014707 | 0.007798  | -1.78 |
| ILMN_2211800 | HMGB1     | 0.19  | 8.36  | 3.27  | 0.0014719 | 0.0078035 | -1.78 |
| ILMN_1788387 | UGGT2     | 0.12  | 7.41  | 3.27  | 0.0014727 | 0.0078064 | -1.78 |
| ILMN_1684802 | TAF5      | -0.10 | 7.16  | -3.27 | 0.0014744 | 0.0078144 | -1.78 |
| ILMN_1657144 | IBA57     | -0.11 | 6.68  | -3.27 | 0.0014773 | 0.0078283 | -1.78 |
| ILMN_1730504 | AGPAT4    | 0.22  | 7.15  | 3.27  | 0.0014775 | 0.0078283 | -1.78 |
| ILMN_1713901 | KDELR3    | 0.33  | 7.89  | 3.27  | 0.0014779 | 0.0078293 | -1.78 |
| ILMN_3248928 | UBN2      | -0.11 | 7.16  | -3.27 | 0.0014792 | 0.0078346 | -1.78 |
| ILMN_1690442 | TMEM241   | 0.14  | 6.83  | 3.27  | 0.0014807 | 0.0078416 | -1.78 |
| ILMN_1692517 | SORD      | 0.22  | 9.86  | 3.27  | 0.0014817 | 0.0078457 | -1.79 |
| ILMN_1714397 | CRYL1     | -0.24 | 8.29  | -3.27 | 0.0014838 | 0.0078553 | -1.79 |
| ILMN_1803408 | KRT18     | -0.13 | 6.97  | -3.27 | 0.0014845 | 0.0078571 | -1.79 |
| ILMN_2302654 | LRP8      | 0.11  | 6.51  | 3.27  | 0.0014845 | 0.0078571 | -1.79 |
| ILMN_1671142 | GPR68     | 0.13  | 6.65  | 3.27  | 0.001486  | 0.0078635 | -1.79 |
| ILMN_3187852 | KANSL3    | -0.11 | 10.22 | -3.27 | 0.0014881 | 0.0078733 | -1.79 |
| ILMN_1741404 | MSC       | 0.15  | 6.63  | 3.27  | 0.001489  | 0.0078771 | -1.79 |
| ILMN_1667176 | NA        | -0.11 | 6.59  | -3.27 | 0.0014893 | 0.0078774 | -1.79 |
| ILMN_1668559 | RGS10     | 0.20  | 7.26  | 3.27  | 0.0014907 | 0.0078835 | -1.79 |
| ILMN_1749709 | NDUFB11   | -0.15 | 9.64  | -3.27 | 0.0014929 | 0.0078939 | -1.79 |
| ILMN_1683905 | MISP      | -0.21 | 7.80  | -3.27 | 0.0014933 | 0.0078951 | -1.79 |
| ILMN_1761044 | GNB1L     | 0.09  | 6.62  | 3.27  | 0.0014952 | 0.0079039 | -1.79 |
| ILMN_2086890 | ANGPT1    | 0.12  | 6.86  | 3.27  | 0.0014961 | 0.0079072 | -1.79 |
| ILMN_2152465 | PIP4K2A   | 0.09  | 6.64  | 3.27  | 0.0014963 | 0.0079072 | -1.79 |
| ILMN_1744023 | IGF1R     | -0.17 | 7.85  | -3.27 | 0.0015    | 0.0079257 | -1.80 |
| ILMN_1664859 | ST8SIA1   | 0.11  | 6.58  | 3.27  | 0.0015012 | 0.0079305 | -1.80 |



|              |           |       |       |       |           |           |       |
|--------------|-----------|-------|-------|-------|-----------|-----------|-------|
| ILMN_1668090 | STK25     | -0.15 | 8.43  | -3.27 | 0.0015015 | 0.007931  | -1.80 |
| ILMN_1669142 | NAA15     | 0.15  | 7.18  | 3.27  | 0.0015082 | 0.0079651 | -1.80 |
| ILMN_2410772 | KEAP1     | -0.11 | 7.74  | -3.26 | 0.0015095 | 0.0079709 | -1.80 |
| ILMN_2129015 | AFF1      | -0.24 | 8.00  | -3.26 | 0.0015103 | 0.0079736 | -1.80 |
| ILMN_1732725 | PPP6R3    | -0.11 | 8.44  | -3.26 | 0.0015132 | 0.0079877 | -1.80 |
| ILMN_1712634 | TIA1      | -0.15 | 7.64  | -3.26 | 0.0015144 | 0.0079931 | -1.81 |
| ILMN_1718449 | NSUN5P2   | -0.09 | 6.63  | -3.26 | 0.0015151 | 0.0079955 | -1.81 |
| ILMN_1753440 | DCAF16    | -0.13 | 7.43  | -3.26 | 0.0015188 | 0.0080137 | -1.81 |
| ILMN_2192693 | EIF3M     | 0.20  | 9.71  | 3.26  | 0.001523  | 0.0080345 | -1.81 |
| ILMN_2082324 | SLC36A4   | 0.15  | 7.25  | 3.26  | 0.0015235 | 0.0080362 | -1.81 |
| ILMN_1728570 | TCF21     | 0.28  | 7.91  | 3.26  | 0.0015245 | 0.0080401 | -1.81 |
| ILMN_1674385 | YWHAQ     | 0.13  | 11.54 | 3.26  | 0.0015248 | 0.0080406 | -1.81 |
| ILMN_1806198 | VSIG1     | 0.16  | 6.48  | 3.26  | 0.0015258 | 0.0080445 | -1.81 |
| ILMN_1706005 | GALT      | -0.11 | 7.00  | -3.26 | 0.0015263 | 0.0080459 | -1.81 |
| ILMN_1770732 | COPS3     | 0.13  | 9.43  | 3.26  | 0.0015279 | 0.008053  | -1.81 |
| ILMN_1712766 | ERGIC2    | 0.12  | 7.25  | 3.26  | 0.0015299 | 0.0080616 | -1.81 |
| ILMN_2293511 | NA        | -0.10 | 6.83  | -3.26 | 0.00153   | 0.0080616 | -1.81 |
| ILMN_1773017 | EXOC3L4   | -0.14 | 6.90  | -3.26 | 0.001532  | 0.0080709 | -1.82 |
| ILMN_1749752 | GAR1      | -0.10 | 7.16  | -3.26 | 0.0015323 | 0.0080717 | -1.82 |
| ILMN_1660552 | BMP5      | -0.20 | 7.09  | -3.26 | 0.0015337 | 0.0080773 | -1.82 |
| ILMN_1658318 | COLCA2    | -0.11 | 6.58  | -3.26 | 0.0015348 | 0.008082  | -1.82 |
| ILMN_1660837 | CLCN3     | -0.21 | 8.91  | -3.26 | 0.001535  | 0.008082  | -1.82 |
| ILMN_1812096 | CADM4     | 0.10  | 6.39  | 3.26  | 0.001536  | 0.0080862 | -1.82 |
| ILMN_1667594 | KLF10     | -0.12 | 6.73  | -3.26 | 0.0015392 | 0.0081014 | -1.82 |
| ILMN_2399264 | 6-Sep     | 0.22  | 7.28  | 3.26  | 0.0015445 | 0.0081285 | -1.82 |
| ILMN_1730218 | SYNPO2    | 0.11  | 6.44  | 3.26  | 0.0015474 | 0.0081421 | -1.83 |
| ILMN_1760727 | ANG       | -0.22 | 10.09 | -3.26 | 0.0015533 | 0.0081721 | -1.83 |
| ILMN_1693430 | NME1-NME2 | 0.09  | 6.74  | 3.26  | 0.0015542 | 0.0081756 | -1.83 |
| ILMN_1761199 | SLCO2B1   | 0.22  | 8.37  | 3.26  | 0.0015548 | 0.0081773 | -1.83 |
| ILMN_1678643 | FHL2      | -0.11 | 6.40  | -3.26 | 0.0015551 | 0.0081777 | -1.83 |
| ILMN_1653940 | USP2      | -0.12 | 6.70  | -3.26 | 0.0015563 | 0.0081831 | -1.83 |
| ILMN_1655177 | PI4KA     | -0.15 | 9.70  | -3.25 | 0.0015584 | 0.0081913 | -1.83 |
| ILMN_3255124 | ATL1      | -0.12 | 6.85  | -3.26 | 0.0015582 | 0.0081913 | -1.83 |
| ILMN_1793367 | LOC729966 | -0.23 | 7.08  | -3.25 | 0.0015587 | 0.0081918 | -1.83 |
| ILMN_2045911 | FBXO28    | 0.13  | 7.70  | 3.25  | 0.0015613 | 0.0082041 | -1.83 |
| ILMN_1681340 | HSPB11    | 0.14  | 7.61  | 3.25  | 0.0015622 | 0.0082078 | -1.83 |
| ILMN_2087060 | TOMM7     | 0.11  | 11.86 | 3.25  | 0.0015636 | 0.0082136 | -1.83 |
| ILMN_1684155 | C22orf46  | -0.10 | 7.19  | -3.25 | 0.001564  | 0.0082147 | -1.84 |
| ILMN_1689989 | CDC42BPB  | 0.12  | 7.58  | 3.25  | 0.001566  | 0.0082239 | -1.84 |
| ILMN_1848916 | NA        | 0.10  | 6.67  | 3.25  | 0.001567  | 0.0082279 | -1.84 |
| ILMN_1709795 | RAC2      | 0.50  | 9.92  | 3.25  | 0.0015692 | 0.0082379 | -1.84 |
| ILMN_1653031 | NA        | -0.10 | 6.54  | -3.25 | 0.0015699 | 0.0082406 | -1.84 |
| ILMN_1798947 | ANKRD55   | 0.09  | 6.35  | 3.25  | 0.0015747 | 0.0082646 | -1.84 |
| ILMN_1739086 | SNORD43   | 0.07  | 6.49  | 3.25  | 0.0015752 | 0.0082657 | -1.84 |
| ILMN_2070300 | LSM2      | 0.16  | 9.72  | 3.25  | 0.0015754 | 0.0082657 | -1.84 |
| ILMN_1761721 | VPS35     | -0.12 | 9.84  | -3.25 | 0.0015758 | 0.0082664 | -1.84 |
| ILMN_1731107 | CCDC92    | 0.15  | 7.95  | 3.25  | 0.0015781 | 0.0082771 | -1.84 |
| ILMN_1701243 | C10orf2   | 0.13  | 6.97  | 3.25  | 0.0015787 | 0.0082794 | -1.84 |

|              |          |       |       |       |           |           |       |
|--------------|----------|-------|-------|-------|-----------|-----------|-------|
| ILMN_1707356 | CFL2     | 0.08  | 6.53  | 3.25  | 0.0015803 | 0.0082861 | -1.84 |
| ILMN_2116127 | NPEPPS   | -0.14 | 9.26  | -3.25 | 0.0015813 | 0.0082901 | -1.85 |
| ILMN_1662935 | C1QTNF7  | 0.12  | 6.55  | 3.25  | 0.0015835 | 0.0083006 | -1.85 |
| ILMN_1661309 | XKR4     | 0.13  | 6.89  | 3.25  | 0.0015873 | 0.0083194 | -1.85 |
| ILMN_1752589 | TMEM183A | -0.16 | 9.90  | -3.25 | 0.0015914 | 0.0083394 | -1.85 |
| ILMN_2349124 | OSBPL2   | -0.16 | 6.90  | -3.25 | 0.0015933 | 0.0083482 | -1.85 |
| ILMN_3246353 | SNORD65  | 0.09  | 6.66  | 3.25  | 0.0015946 | 0.0083536 | -1.85 |
| ILMN_1684402 | STXBP5   | 0.20  | 7.94  | 3.25  | 0.0015974 | 0.0083669 | -1.85 |
| ILMN_2056167 | OSTC     | 0.19  | 8.70  | 3.25  | 0.001604  | 0.0084003 | -1.86 |
| ILMN_1660577 | ATP5G2   | -0.18 | 10.87 | -3.25 | 0.0016054 | 0.0084064 | -1.86 |
| ILMN_1668839 | ACOX1    | -0.08 | 6.40  | -3.24 | 0.0016077 | 0.0084159 | -1.86 |
| ILMN_2202915 | FAR2     | -0.22 | 8.34  | -3.24 | 0.0016076 | 0.0084159 | -1.86 |
| ILMN_1746090 | STT3A    | 0.15  | 9.34  | 3.24  | 0.0016079 | 0.0084159 | -1.86 |
| ILMN_1779370 | ARHGEF9  | -0.08 | 6.74  | -3.24 | 0.0016085 | 0.0084173 | -1.86 |
| ILMN_1689734 | IL1RN    | 0.19  | 6.44  | 3.24  | 0.0016113 | 0.0084308 | -1.86 |
| ILMN_1796655 | SPO11    | -0.09 | 6.45  | -3.25 | 0.0016152 | 0.0084501 | -1.85 |
| ILMN_2369104 | TRAPPC6B | 0.16  | 8.34  | 3.24  | 0.0016158 | 0.0084521 | -1.87 |
| ILMN_1676026 | MRPS26   | -0.15 | 8.23  | -3.24 | 0.0016174 | 0.0084592 | -1.87 |
| ILMN_1652073 | RPS23    | 0.22  | 11.31 | 3.24  | 0.0016177 | 0.0084595 | -1.86 |
| ILMN_2170353 | NA       | -0.17 | 10.15 | -3.24 | 0.0016204 | 0.0084723 | -1.87 |
| ILMN_1763637 | RUBCN    | 0.09  | 6.60  | 3.24  | 0.001621  | 0.0084742 | -1.87 |
| ILMN_1713422 | ST18     | 0.10  | 6.50  | 3.24  | 0.0016227 | 0.0084791 | -1.87 |
| ILMN_1746241 | SDHC     | -0.16 | 8.15  | -3.24 | 0.0016225 | 0.0084791 | -1.87 |
| ILMN_1762713 | MCEMP1   | 0.20  | 6.49  | 3.24  | 0.0016227 | 0.0084791 | -1.87 |
| ILMN_1725441 | NFATC2IP | -0.12 | 7.18  | -3.24 | 0.0016257 | 0.0084935 | -1.87 |
| ILMN_1801521 | ABCC6    | -0.13 | 6.55  | -3.24 | 0.0016261 | 0.0084942 | -1.87 |
| ILMN_1689176 | NDNF     | -0.15 | 7.01  | -3.24 | 0.0016271 | 0.008498  | -1.87 |
| ILMN_1746578 | SLC23A2  | 0.12  | 6.91  | 3.24  | 0.0016278 | 0.0085005 | -1.87 |
| ILMN_2057479 | EGFL6    | 0.17  | 6.48  | 3.24  | 0.00163   | 0.0085109 | -1.87 |
| ILMN_1706845 | OPHN1    | -0.10 | 6.57  | -3.24 | 0.0016321 | 0.0085204 | -1.87 |
| ILMN_3237721 | TANGO6   | 0.08  | 6.60  | 3.24  | 0.0016373 | 0.0085459 | -1.87 |
| ILMN_1712751 | HADHA    | -0.16 | 7.85  | -3.24 | 0.0016402 | 0.0085598 | -1.88 |
| ILMN_1791186 | ARHGAP18 | -0.11 | 6.75  | -3.24 | 0.0016423 | 0.0085699 | -1.88 |
| ILMN_3281877 | NA       | 0.43  | 7.33  | 3.24  | 0.0016447 | 0.0085807 | -1.88 |
| ILMN_2386973 | PKP2     | -0.24 | 8.73  | -3.24 | 0.0016457 | 0.0085847 | -1.88 |
| ILMN_1753265 | C12orf76 | -0.11 | 6.88  | -3.24 | 0.0016482 | 0.0085966 | -1.88 |
| ILMN_2043728 | ZNF341   | -0.14 | 7.00  | -3.24 | 0.0016494 | 0.0086004 | -1.88 |
| ILMN_2336728 | DLG3     | -0.13 | 7.08  | -3.24 | 0.0016493 | 0.0086004 | -1.88 |
| ILMN_2093427 | SHF      | 0.09  | 6.62  | 3.24  | 0.0016557 | 0.0086316 | -1.89 |
| ILMN_1720858 | ABRACL   | -0.21 | 9.44  | -3.24 | 0.0016577 | 0.008641  | -1.89 |
| ILMN_1658885 | DAGLB    | -0.13 | 7.93  | -3.23 | 0.0016601 | 0.0086521 | -1.89 |
| ILMN_1677509 | PRR7     | 0.09  | 6.43  | 3.23  | 0.0016686 | 0.0086912 | -1.89 |
| ILMN_1698209 | AGPS     | 0.16  | 8.06  | 3.23  | 0.0016681 | 0.0086912 | -1.89 |
| ILMN_1790410 | DROSHA   | -0.15 | 8.37  | -3.23 | 0.0016686 | 0.0086912 | -1.89 |
| ILMN_2222984 | NA       | 0.12  | 9.83  | 3.23  | 0.0016686 | 0.0086912 | -1.89 |
| ILMN_1680054 | LAMB3    | -0.10 | 6.47  | -3.23 | 0.0016695 | 0.0086944 | -1.90 |
| ILMN_1741371 | TMEM8A   | -0.17 | 7.85  | -3.23 | 0.0016712 | 0.0087022 | -1.90 |
| ILMN_3246801 | DNAJC30  | -0.09 | 6.82  | -3.23 | 0.0016721 | 0.0087052 | -1.90 |

|              |           |       |       |       |           |           |       |
|--------------|-----------|-------|-------|-------|-----------|-----------|-------|
| ILMN_1780773 | LINC00938 | -0.17 | 8.52  | -3.23 | 0.0016738 | 0.0087129 | -1.90 |
| ILMN_2396338 | BANP      | -0.07 | 6.48  | -3.23 | 0.0016761 | 0.0087237 | -1.90 |
| ILMN_1660193 | ZNF529    | 0.14  | 7.71  | 3.23  | 0.0016792 | 0.0087383 | -1.89 |
| ILMN_1779428 | CCDC184   | 0.07  | 6.38  | 3.23  | 0.0016798 | 0.0087403 | -1.90 |
| ILMN_1686645 | UTP14C    | -0.17 | 8.26  | -3.23 | 0.0016813 | 0.0087467 | -1.90 |
| ILMN_1871361 | NA        | -0.09 | 6.57  | -3.23 | 0.0016827 | 0.0087529 | -1.90 |
| ILMN_3269956 | NA        | 0.08  | 6.36  | 3.23  | 0.0016877 | 0.0087773 | -1.91 |
| ILMN_1682938 | ARF3      | -0.23 | 8.77  | -3.23 | 0.0016884 | 0.0087796 | -1.91 |
| ILMN_3178043 | BEND7     | 0.09  | 6.88  | 3.23  | 0.0016909 | 0.0087914 | -1.91 |
| ILMN_1815885 | ZNF112    | -0.13 | 7.15  | -3.23 | 0.0016926 | 0.0087988 | -1.91 |
| ILMN_1693310 | ITFG1     | -0.14 | 9.58  | -3.23 | 0.0016935 | 0.0088021 | -1.90 |
| ILMN_1657423 | SPG21     | 0.17  | 7.64  | 3.23  | 0.0016986 | 0.0088271 | -1.91 |
| ILMN_2378654 | B3GALT5   | -0.13 | 6.56  | -3.23 | 0.0016989 | 0.0088279 | -1.91 |
| ILMN_1659095 | RPL7A     | 0.16  | 12.67 | 3.23  | 0.0017067 | 0.0088666 | -1.92 |
| ILMN_1654289 | ELK1      | 0.11  | 7.89  | 3.23  | 0.001708  | 0.0088724 | -1.92 |
| ILMN_1730464 | DNAL1     | 0.10  | 6.77  | 3.23  | 0.0017087 | 0.0088747 | -1.92 |
| ILMN_1715669 | TP53I11   | -0.11 | 6.85  | -3.22 | 0.0017149 | 0.0089054 | -1.92 |
| ILMN_1737343 | FNIP1     | 0.12  | 8.24  | 3.22  | 0.0017155 | 0.008907  | -1.92 |
| ILMN_2303166 | MBNL3     | -0.08 | 6.58  | -3.22 | 0.0017159 | 0.0089078 | -1.92 |
| ILMN_1663489 | UBR2      | 0.13  | 8.05  | 3.22  | 0.0017204 | 0.0089301 | -1.92 |
| ILMN_1779353 | PUS7      | 0.19  | 7.99  | 3.22  | 0.0017224 | 0.008939  | -1.92 |
| ILMN_1807074 | MIF       | 0.22  | 10.15 | 3.22  | 0.0017232 | 0.008942  | -1.92 |
| ILMN_1756146 | WDR45     | 0.12  | 7.10  | 3.22  | 0.0017237 | 0.0089429 | -1.92 |
| ILMN_1693882 | TAPT1     | -0.11 | 7.43  | -3.22 | 0.0017256 | 0.0089514 | -1.93 |
| ILMN_1664096 | NA        | -0.10 | 6.62  | -3.22 | 0.001728  | 0.0089615 | -1.93 |
| ILMN_1685661 | RRP15     | 0.17  | 7.51  | 3.22  | 0.0017279 | 0.0089615 | -1.93 |
| ILMN_2224103 | PAPSS1    | 0.16  | 6.99  | 3.22  | 0.0017285 | 0.0089623 | -1.93 |
| ILMN_1686937 | ETNK1     | -0.08 | 6.43  | -3.22 | 0.0017301 | 0.0089695 | -1.93 |
| ILMN_1680419 | ASB7      | 0.08  | 6.59  | 3.22  | 0.0017324 | 0.0089798 | -1.93 |
| ILMN_1703564 | DYNLRB1   | -0.13 | 8.55  | -3.22 | 0.0017362 | 0.0089986 | -1.93 |
| ILMN_1687921 | JMJD8     | 0.13  | 9.98  | 3.22  | 0.001742  | 0.0090271 | -1.93 |
| ILMN_1783676 | CCDC15    | -0.11 | 6.79  | -3.22 | 0.0017425 | 0.0090285 | -1.93 |
| ILMN_1664772 | ATP2B4    | 0.12  | 6.59  | 3.22  | 0.0017466 | 0.0090484 | -1.94 |
| ILMN_1689001 | CDK4      | 0.16  | 8.99  | 3.22  | 0.0017486 | 0.0090572 | -1.94 |
| ILMN_1675819 | NA        | -0.13 | 6.77  | -3.22 | 0.001749  | 0.0090581 | -1.94 |
| ILMN_1731233 | GZMH      | 0.14  | 6.59  | 3.22  | 0.0017499 | 0.0090613 | -1.94 |
| ILMN_1872122 | LCOR      | -0.13 | 7.09  | -3.22 | 0.0017503 | 0.0090619 | -1.94 |
| ILMN_1768449 | PRPSAP1   | -0.12 | 9.42  | -3.22 | 0.0017517 | 0.0090676 | -1.93 |
| ILMN_1658071 | ATP1B1    | -0.25 | 11.34 | -3.22 | 0.0017545 | 0.0090796 | -1.94 |
| ILMN_1705682 | P3H3      | 0.12  | 6.82  | 3.22  | 0.0017544 | 0.0090796 | -1.94 |
| ILMN_2089752 | FAM150B   | -0.25 | 7.34  | -3.22 | 0.0017571 | 0.0090916 | -1.94 |
| ILMN_1849745 | NA        | -0.09 | 6.58  | -3.22 | 0.0017606 | 0.0091083 | -1.94 |
| ILMN_2385191 | QRICH1    | 0.09  | 6.61  | 3.22  | 0.0017615 | 0.0091117 | -1.94 |
| ILMN_2085760 | ARPC1B    | 0.19  | 7.55  | 3.22  | 0.0017641 | 0.0091239 | -1.95 |
| ILMN_2366330 | FERMT3    | 0.23  | 7.63  | 3.22  | 0.0017645 | 0.0091245 | -1.95 |
| ILMN_1675239 | NDUFA7    | -0.14 | 8.15  | -3.22 | 0.001767  | 0.0091363 | -1.95 |
| ILMN_2374234 | PRKACB    | -0.16 | 7.10  | -3.22 | 0.0017689 | 0.0091443 | -1.94 |
| ILMN_1672122 | P4HTM     | -0.09 | 7.06  | -3.21 | 0.0017695 | 0.0091463 | -1.95 |

|              |          |       |       |       |           |           |       |
|--------------|----------|-------|-------|-------|-----------|-----------|-------|
| ILMN_1726554 | IREB2    | -0.13 | 7.08  | -3.21 | 0.0017704 | 0.0091497 | -1.95 |
| ILMN_1790100 | DDIAS    | 0.14  | 6.85  | 3.21  | 0.0017747 | 0.0091706 | -1.95 |
| ILMN_1804834 | OARD1    | -0.13 | 8.34  | -3.21 | 0.0017767 | 0.0091792 | -1.95 |
| ILMN_1688580 | CAMP     | 0.12  | 6.40  | 3.21  | 0.0017775 | 0.0091822 | -1.95 |
| ILMN_1690217 | BFSP2    | 0.08  | 6.35  | 3.21  | 0.0017781 | 0.0091838 | -1.95 |
| ILMN_1765620 | NA       | -0.13 | 6.63  | -3.21 | 0.0017788 | 0.0091859 | -1.95 |
| ILMN_3224204 | PSMG4    | 0.14  | 7.66  | 3.21  | 0.0017804 | 0.0091931 | -1.95 |
| ILMN_1742026 | PYHIN1   | 0.09  | 6.54  | 3.21  | 0.0017819 | 0.0091992 | -1.96 |
| ILMN_1658080 | ZNF573   | -0.13 | 7.59  | -3.21 | 0.0017841 | 0.0092095 | -1.96 |
| ILMN_1811387 | TFF3     | -0.28 | 13.20 | -3.21 | 0.0017847 | 0.0092112 | -1.96 |
| ILMN_1739164 | CDC14A   | -0.07 | 6.41  | -3.21 | 0.0017857 | 0.0092147 | -1.96 |
| ILMN_1680687 | NSF      | -0.12 | 7.13  | -3.21 | 0.0017884 | 0.0092273 | -1.96 |
| ILMN_1878191 | NA       | -0.10 | 6.67  | -3.21 | 0.0017933 | 0.009251  | -1.96 |
| ILMN_1754579 | SYNE2    | -0.13 | 6.95  | -3.21 | 0.0017946 | 0.0092563 | -1.96 |
| ILMN_1727553 | ZBED8    | -0.13 | 7.02  | -3.21 | 0.0017949 | 0.0092569 | -1.96 |
| ILMN_2323302 | SON      | -0.15 | 7.05  | -3.21 | 0.0017956 | 0.0092587 | -1.96 |
| ILMN_1675640 | OAS1     | -0.34 | 8.38  | -3.21 | 0.0018008 | 0.0092844 | -1.97 |
| ILMN_1679115 | TPH1     | -0.12 | 6.54  | -3.21 | 0.0018083 | 0.0093216 | -1.97 |
| ILMN_1777740 | THEM6    | -0.22 | 8.48  | -3.21 | 0.0018086 | 0.0093216 | -1.97 |
| ILMN_2380588 | DNPH1    | -0.17 | 8.40  | -3.21 | 0.0018088 | 0.0093216 | -1.97 |
| ILMN_1741674 | PPP1R9A  | -0.11 | 6.91  | -3.21 | 0.00181   | 0.0093263 | -1.97 |
| ILMN_1753275 | DENND1A  | -0.11 | 6.73  | -3.21 | 0.0018111 | 0.0093307 | -1.96 |
| ILMN_1680274 | NA       | 1.04  | 10.95 | 3.21  | 0.0018117 | 0.0093321 | -1.97 |
| ILMN_1724532 | C11orf49 | -0.08 | 6.44  | -3.21 | 0.0018122 | 0.0093331 | -1.97 |
| ILMN_1718990 | NFRKB    | -0.10 | 6.73  | -3.21 | 0.0018141 | 0.0093418 | -1.97 |
| ILMN_1765232 | RNLS     | -0.12 | 6.99  | -3.21 | 0.0018154 | 0.0093461 | -1.97 |
| ILMN_1793732 | FARS2    | 0.11  | 7.84  | 3.21  | 0.0018155 | 0.0093461 | -1.97 |
| ILMN_1741007 | SGCA     | 0.10  | 6.62  | 3.21  | 0.0018166 | 0.0093499 | -1.97 |
| ILMN_1791478 | NA       | 0.21  | 8.59  | 3.21  | 0.0018168 | 0.0093499 | -1.97 |
| ILMN_3238570 | EIF3CL   | -0.16 | 7.00  | -3.21 | 0.0018175 | 0.0093508 | -1.97 |
| ILMN_3248890 | SNORA24  | 0.15  | 7.42  | 3.21  | 0.0018172 | 0.0093508 | -1.97 |
| ILMN_1693039 | ZFPL1    | -0.09 | 6.86  | -3.20 | 0.0018281 | 0.009404  | -1.98 |
| ILMN_3246292 | RPL23A   | 0.15  | 12.49 | 3.20  | 0.001829  | 0.0094074 | -1.97 |
| ILMN_3237574 | CHRNA7   | -0.15 | 6.58  | -3.20 | 0.0018323 | 0.009423  | -1.98 |
| ILMN_3244574 | CFAP97   | 0.10  | 6.78  | 3.20  | 0.0018327 | 0.0094233 | -1.98 |
| ILMN_1662232 | DCTN2    | -0.12 | 10.20 | -3.20 | 0.0018354 | 0.0094358 | -1.98 |
| ILMN_1741632 | RAB3IL1  | 0.19  | 7.34  | 3.20  | 0.0018365 | 0.0094401 | -1.98 |
| ILMN_2227757 | PCDHB2   | 0.12  | 6.55  | 3.20  | 0.0018374 | 0.0094433 | -1.98 |
| ILMN_2304512 | SAA1     | 0.20  | 6.56  | 3.20  | 0.00184   | 0.0094553 | -1.99 |
| ILMN_1757143 | DGKZ     | -0.08 | 6.51  | -3.20 | 0.0018411 | 0.0094594 | -1.99 |
| ILMN_1677484 | SNAPC4   | -0.14 | 8.04  | -3.20 | 0.0018432 | 0.0094677 | -1.99 |
| ILMN_1786823 | ICAM2    | 0.22  | 7.72  | 3.20  | 0.0018431 | 0.0094677 | -1.99 |
| ILMN_1671250 | CLIC4    | 0.11  | 6.88  | 3.20  | 0.0018522 | 0.0095126 | -1.99 |
| ILMN_1657436 | FGFR1OP2 | 0.15  | 7.49  | 3.20  | 0.0018533 | 0.0095165 | -1.98 |
| ILMN_1755222 | CAAP1    | -0.10 | 7.10  | -3.20 | 0.0018549 | 0.0095219 | -1.99 |
| ILMN_2342695 | PDGFA    | -0.16 | 6.97  | -3.20 | 0.0018547 | 0.0095219 | -1.99 |
| ILMN_1684289 | PNPO     | -0.19 | 9.13  | -3.20 | 0.0018556 | 0.0095241 | -1.99 |
| ILMN_1808333 | PPP1R7   | -0.14 | 7.96  | -3.20 | 0.0018591 | 0.0095404 | -1.99 |

|              |           |       |      |       |           |           |       |
|--------------|-----------|-------|------|-------|-----------|-----------|-------|
| ILMN_1756126 | STUB1     | -0.16 | 8.01 | -3.20 | 0.0018632 | 0.0095601 | -2.00 |
| ILMN_1764168 | STXBP3    | -0.14 | 8.19 | -3.20 | 0.0018637 | 0.0095614 | -2.00 |
| ILMN_1796316 | MMP9      | 0.62  | 8.14 | 3.20  | 0.0018652 | 0.0095677 | -2.00 |
| ILMN_2413816 | GRB14     | 0.15  | 6.80 | 3.20  | 0.0018668 | 0.0095745 | -2.00 |
| ILMN_2146372 | KCTD6     | 0.13  | 8.02 | 3.20  | 0.0018681 | 0.0095796 | -2.00 |
| ILMN_3243351 | LOC646214 | 0.12  | 7.44 | 3.20  | 0.0018697 | 0.0095867 | -2.00 |
| ILMN_1783026 | RNPC3     | -0.12 | 6.82 | -3.20 | 0.0018754 | 0.0096143 | -1.99 |
| ILMN_1653358 | FUT3      | -0.26 | 8.98 | -3.20 | 0.0018789 | 0.0096307 | -2.00 |
| ILMN_2334693 | NARF      | -0.16 | 7.85 | -3.19 | 0.0018822 | 0.0096463 | -2.01 |
| ILMN_1678246 | NA        | -0.10 | 6.51 | -3.19 | 0.0018851 | 0.0096598 | -2.01 |
| ILMN_2172269 | TMEM183B  | -0.13 | 9.88 | -3.19 | 0.0018872 | 0.0096692 | -2.01 |
| ILMN_1743055 | NAT1      | -0.12 | 6.73 | -3.19 | 0.0018883 | 0.0096731 | -2.01 |
| ILMN_1667561 | IFRD1     | 0.16  | 8.23 | 3.19  | 0.0018913 | 0.0096873 | -2.01 |
| ILMN_3245476 | PHRF1     | -0.12 | 9.11 | -3.19 | 0.0018917 | 0.0096876 | -2.01 |
| ILMN_1685602 | TMEM41A   | -0.12 | 6.94 | -3.19 | 0.0018929 | 0.0096926 | -2.01 |
| ILMN_1799487 | N4BP2L1   | 0.12  | 7.08 | 3.19  | 0.0018975 | 0.0097145 | -2.01 |
| ILMN_1689665 | NAE1      | -0.12 | 9.44 | -3.19 | 0.0019012 | 0.0097319 | -2.02 |
| ILMN_1694596 | FAR2      | -0.16 | 7.17 | -3.19 | 0.0019015 | 0.0097324 | -2.02 |
| ILMN_1741970 | JUP       | -0.13 | 7.11 | -3.19 | 0.0019032 | 0.0097395 | -2.01 |
| ILMN_2376847 | PDE1A     | 0.10  | 6.55 | 3.19  | 0.0019049 | 0.0097465 | -2.02 |
| ILMN_1740762 | GRB7      | -0.08 | 6.50 | -3.19 | 0.0019108 | 0.0097739 | -2.02 |
| ILMN_3307916 | BMPER     | 0.12  | 6.51 | 3.19  | 0.0019108 | 0.0097739 | -2.02 |
| ILMN_2404512 | PSEN2     | -0.11 | 6.77 | -3.19 | 0.0019112 | 0.0097747 | -2.02 |
| ILMN_2332558 | ARL5A     | 0.14  | 8.67 | 3.19  | 0.0019121 | 0.0097775 | -2.02 |
| ILMN_1746831 | ZNF114    | -0.09 | 6.50 | -3.19 | 0.0019133 | 0.0097824 | -2.02 |
| ILMN_1867321 | NA        | -0.11 | 6.65 | -3.19 | 0.0019139 | 0.0097841 | -2.02 |
| ILMN_1815656 | SERINC3   | -0.13 | 8.93 | -3.19 | 0.0019163 | 0.0097947 | -2.02 |
| ILMN_2156786 | PGGT1B    | -0.08 | 6.77 | -3.19 | 0.001917  | 0.0097968 | -2.02 |
| ILMN_1731484 | RHOT1     | -0.11 | 6.97 | -3.19 | 0.0019188 | 0.0098045 | -2.02 |
| ILMN_1660187 | MKRN2OS   | -0.08 | 6.47 | -3.19 | 0.001924  | 0.0098282 | -2.03 |
| ILMN_1713523 | KBTBD12   | -0.15 | 6.56 | -3.19 | 0.0019238 | 0.0098282 | -2.03 |
| ILMN_2340919 | GRB10     | 0.11  | 6.61 | 3.19  | 0.0019248 | 0.0098312 | -2.03 |
| ILMN_1662880 | LINC01554 | 0.08  | 6.43 | 3.19  | 0.0019267 | 0.0098392 | -2.03 |
| ILMN_1655330 | SPAG11B   | 0.07  | 6.29 | 3.19  | 0.0019288 | 0.0098462 | -2.03 |
| ILMN_2197225 | NA        | -0.15 | 7.15 | -3.19 | 0.0019289 | 0.0098462 | -2.03 |
| ILMN_2313434 | TCP1      | -0.13 | 7.14 | -3.19 | 0.0019289 | 0.0098462 | -2.03 |
| ILMN_2412024 | JMJD6     | 0.12  | 6.72 | 3.19  | 0.0019305 | 0.0098528 | -2.03 |
| ILMN_2102670 | GATA2     | 0.08  | 6.46 | 3.19  | 0.0019344 | 0.0098713 | -2.03 |
| ILMN_3309484 | MIR10B    | -0.09 | 6.42 | -3.19 | 0.0019371 | 0.0098834 | -2.03 |
| ILMN_3304203 | CLEC2D    | 0.10  | 6.61 | 3.19  | 0.0019375 | 0.0098843 | -2.03 |
| ILMN_3230435 | VOPP1     | 0.23  | 8.62 | 3.19  | 0.00194   | 0.0098956 | -2.03 |
| ILMN_1801045 | SPIN3     | -0.10 | 7.07 | -3.19 | 0.0019408 | 0.0098979 | -2.03 |
| ILMN_1696933 | NLRP3     | 0.09  | 6.48 | 3.18  | 0.0019506 | 0.0099467 | -2.04 |
| ILMN_2389273 | FXR1      | 0.12  | 7.42 | 3.18  | 0.0019539 | 0.0099618 | -2.04 |
| ILMN_1667858 | ZNF493    | -0.09 | 6.56 | -3.18 | 0.0019578 | 0.0099802 | -2.04 |
| ILMN_1814737 | LNPEP     | 0.10  | 6.94 | 3.18  | 0.0019587 | 0.0099832 | -2.04 |
| ILMN_1705774 | TIGD5     | -0.12 | 7.46 | -3.18 | 0.0019613 | 0.009995  | -2.04 |
| ILMN_1705985 | PIGA      | 0.12  | 8.61 | 3.18  | 0.0019639 | 0.0100068 | -2.05 |

|              |          |       |       |       |           |           |       |
|--------------|----------|-------|-------|-------|-----------|-----------|-------|
| ILMN_1719763 | WDR83    | -0.10 | 6.78  | -3.18 | 0.0019642 | 0.0100068 | -2.05 |
| ILMN_1679501 | CSNK2A1  | -0.09 | 6.49  | -3.18 | 0.0019664 | 0.010017  | -2.05 |
| ILMN_1672124 | FAM198B  | 0.24  | 7.58  | 3.18  | 0.001969  | 0.0100287 | -2.04 |
| ILMN_2260991 | TSPO     | -0.22 | 9.12  | -3.18 | 0.0019753 | 0.0100592 | -2.05 |
| ILMN_1794539 | KIF11    | 0.20  | 7.34  | 3.18  | 0.001976  | 0.0100611 | -2.05 |
| ILMN_1697554 | SASH3    | 0.25  | 7.07  | 3.18  | 0.0019799 | 0.0100794 | -2.05 |
| ILMN_1674580 | TRIM36   | -0.10 | 6.46  | -3.18 | 0.0019852 | 0.0101049 | -2.05 |
| ILMN_1651346 | NA       | 0.12  | 7.14  | 3.18  | 0.0019858 | 0.0101064 | -2.05 |
| ILMN_1733696 | IMP3     | -0.11 | 10.37 | -3.18 | 0.0019943 | 0.0101484 | -2.06 |
| ILMN_1676247 | JPH2     | 0.07  | 6.45  | 3.18  | 0.0019965 | 0.0101583 | -2.06 |
| ILMN_1711062 | MMP19    | 0.09  | 6.52  | 3.18  | 0.0020013 | 0.0101811 | -2.06 |
| ILMN_1742330 | PLXNB1   | -0.18 | 7.66  | -3.18 | 0.0020031 | 0.0101888 | -2.05 |
| ILMN_1701507 | EHHADH   | -0.21 | 7.69  | -3.17 | 0.0020058 | 0.0102011 | -2.06 |
| ILMN_1849117 | NA       | 0.13  | 6.72  | 3.17  | 0.0020078 | 0.0102095 | -2.07 |
| ILMN_1781060 | SYN2     | 0.09  | 6.50  | 3.17  | 0.0020097 | 0.0102176 | -2.07 |
| ILMN_1704024 | TMEM160  | -0.15 | 7.96  | -3.17 | 0.0020132 | 0.0102337 | -2.07 |
| ILMN_2100287 | CFAP58   | 0.07  | 6.46  | 3.17  | 0.0020134 | 0.0102337 | -2.07 |
| ILMN_1793770 | DNAJB6   | 0.15  | 8.89  | 3.17  | 0.0020142 | 0.0102361 | -2.07 |
| ILMN_1672899 | POMC     | 0.09  | 6.39  | 3.17  | 0.0020175 | 0.0102499 | -2.07 |
| ILMN_3234089 | N4BP2L2  | -0.16 | 7.51  | -3.17 | 0.0020174 | 0.0102499 | -2.07 |
| ILMN_2090059 | ZFY      | 0.17  | 6.60  | 3.17  | 0.0020182 | 0.0102519 | -2.07 |
| ILMN_1703754 | CEP192   | -0.16 | 8.38  | -3.17 | 0.0020204 | 0.0102615 | -2.07 |
| ILMN_2355665 | MTFP1    | -0.21 | 8.32  | -3.17 | 0.0020238 | 0.0102772 | -2.07 |
| ILMN_2175112 | KCNS3    | -0.25 | 7.21  | -3.17 | 0.0020257 | 0.0102853 | -2.07 |
| ILMN_1788841 | TCL1A    | 0.34  | 6.80  | 3.17  | 0.00203   | 0.0103056 | -2.08 |
| ILMN_2080751 | ADNP2    | 0.11  | 7.70  | 3.17  | 0.0020415 | 0.0103628 | -2.07 |
| ILMN_1686906 | TP53INP2 | -0.30 | 8.45  | -3.17 | 0.0020429 | 0.0103681 | -2.08 |
| ILMN_3257145 | ARHGAP42 | -0.11 | 6.67  | -3.17 | 0.0020509 | 0.0104074 | -2.08 |
| ILMN_1685928 | WDR34    | -0.16 | 7.11  | -3.17 | 0.0020515 | 0.0104087 | -2.09 |
| ILMN_2091347 | IDH1     | -0.28 | 10.35 | -3.17 | 0.0020533 | 0.0104164 | -2.08 |
| ILMN_2070815 | MPDU1    | -0.12 | 7.11  | -3.17 | 0.0020536 | 0.0104165 | -2.09 |
| ILMN_1749846 | OMD      | 0.11  | 6.53  | 3.17  | 0.0020544 | 0.0104187 | -2.09 |
| ILMN_3270641 | HNRNPH3  | -0.15 | 8.78  | -3.17 | 0.0020554 | 0.0104226 | -2.09 |
| ILMN_1781980 | CFC1B    | 0.11  | 6.52  | 3.17  | 0.002058  | 0.0104338 | -2.09 |
| ILMN_1777296 | ACTB     | 0.18  | 12.74 | 3.17  | 0.0020634 | 0.0104601 | -2.09 |
| ILMN_1786469 | FBXO22   | 0.12  | 7.02  | 3.17  | 0.0020662 | 0.0104724 | -2.09 |
| ILMN_1813530 | AGT      | 0.19  | 6.80  | 3.16  | 0.0020684 | 0.0104821 | -2.09 |
| ILMN_1686811 | PPIA     | 0.26  | 8.87  | 3.16  | 0.0020705 | 0.0104913 | -2.09 |
| ILMN_1850816 | NA       | -0.10 | 7.14  | -3.16 | 0.002071  | 0.0104921 | -2.09 |
| ILMN_3249618 | NOP10    | 0.13  | 10.00 | 3.16  | 0.002074  | 0.0105059 | -2.10 |
| ILMN_1727248 | INF2     | -0.17 | 7.84  | -3.16 | 0.0020777 | 0.0105231 | -2.10 |
| ILMN_1680239 | NUDT9    | -0.16 | 8.56  | -3.16 | 0.0020809 | 0.0105377 | -2.10 |
| ILMN_2392274 | CD82     | 0.15  | 7.33  | 3.16  | 0.0020818 | 0.0105407 | -2.10 |
| ILMN_1765326 | DGKD     | -0.21 | 8.33  | -3.16 | 0.0020849 | 0.0105547 | -2.10 |
| ILMN_1714952 | ZNF703   | 0.09  | 6.61  | 3.16  | 0.002086  | 0.0105588 | -2.10 |
| ILMN_1710428 | CDK1     | 0.12  | 6.71  | 3.16  | 0.0020878 | 0.0105665 | -2.10 |
| ILMN_1718813 | CNKSR1   | -0.09 | 6.71  | -3.16 | 0.0020885 | 0.0105687 | -2.10 |
| ILMN_1795275 | USP53    | -0.17 | 7.34  | -3.16 | 0.0020911 | 0.0105799 | -2.10 |

|              |          |       |       |       |           |           |       |
|--------------|----------|-------|-------|-------|-----------|-----------|-------|
| ILMN_1730332 | CASP7    | -0.09 | 6.53  | -3.16 | 0.0020915 | 0.0105804 | -2.10 |
| ILMN_1687316 | NCDN     | 0.07  | 6.53  | 3.16  | 0.0020944 | 0.0105936 | -2.10 |
| ILMN_2414027 | NA       | 0.21  | 9.18  | 3.16  | 0.0020983 | 0.010612  | -2.11 |
| ILMN_1684724 | CR2      | 0.58  | 7.40  | 3.16  | 0.0021034 | 0.010636  | -2.11 |
| ILMN_1675695 | PDS5B    | 0.11  | 7.40  | 3.16  | 0.002104  | 0.0106374 | -2.11 |
| ILMN_2351930 | TRIM33   | 0.10  | 7.31  | 3.16  | 0.0021047 | 0.0106395 | -2.11 |
| ILMN_2388605 | ACTR2    | 0.17  | 11.29 | 3.16  | 0.0021064 | 0.0106468 | -2.11 |
| ILMN_1773002 | SKIDA1   | 0.11  | 6.60  | 3.16  | 0.0021098 | 0.0106621 | -2.11 |
| ILMN_2278152 | TPM1     | -0.19 | 7.62  | -3.16 | 0.0021123 | 0.0106732 | -2.11 |
| ILMN_1720889 | MSMO1    | -0.34 | 8.88  | -3.16 | 0.0021156 | 0.0106886 | -2.11 |
| ILMN_1814213 | PQLC3    | 0.20  | 8.72  | 3.16  | 0.0021172 | 0.0106947 | -2.11 |
| ILMN_1693340 | RAC3     | -0.08 | 6.50  | -3.16 | 0.0021198 | 0.0107067 | -2.12 |
| ILMN_1665243 | FKBP14   | 0.13  | 7.38  | 3.16  | 0.0021241 | 0.0107264 | -2.12 |
| ILMN_3271555 | NA       | 0.13  | 6.67  | 3.16  | 0.0021253 | 0.010731  | -2.12 |
| ILMN_1779410 | VAPA     | -0.10 | 6.70  | -3.16 | 0.0021266 | 0.0107359 | -2.12 |
| ILMN_1683121 | CYP2C18  | 0.38  | 7.46  | 3.16  | 0.0021284 | 0.0107438 | -2.12 |
| ILMN_1744268 | PLEC     | 0.19  | 7.43  | 3.16  | 0.0021293 | 0.0107448 | -2.12 |
| ILMN_1794740 | CD151    | -0.15 | 7.47  | -3.16 | 0.0021291 | 0.0107448 | -2.12 |
| ILMN_1669015 | XPNPEP1  | 0.15  | 10.32 | 3.15  | 0.002134  | 0.010767  | -2.12 |
| ILMN_2219002 | KRT6A    | 0.12  | 6.49  | 3.15  | 0.0021349 | 0.01077   | -2.12 |
| ILMN_1697777 | TSTA3    | 0.20  | 7.56  | 3.15  | 0.0021357 | 0.0107728 | -2.12 |
| ILMN_1874678 | NA       | -0.11 | 6.65  | -3.15 | 0.0021391 | 0.0107883 | -2.12 |
| ILMN_2090558 | MMADHC   | 0.14  | 9.74  | 3.15  | 0.0021417 | 0.0107998 | -2.12 |
| ILMN_1706536 | NA       | 0.11  | 6.57  | 3.15  | 0.0021501 | 0.0108401 | -2.12 |
| ILMN_2310814 | MAPT     | 0.08  | 6.35  | 3.15  | 0.0021503 | 0.0108401 | -2.13 |
| ILMN_1733390 | LARP1B   | 0.15  | 8.21  | 3.15  | 0.0021509 | 0.0108412 | -2.13 |
| ILMN_1734434 | PI4KA    | -0.09 | 6.38  | -3.15 | 0.0021513 | 0.0108419 | -2.13 |
| ILMN_2352042 | MRPL4    | -0.11 | 6.98  | -3.15 | 0.002155  | 0.0108589 | -2.12 |
| ILMN_1798249 | AK4      | -0.13 | 6.74  | -3.15 | 0.0021564 | 0.0108641 | -2.13 |
| ILMN_1673962 | NUP205   | 0.14  | 8.67  | 3.15  | 0.0021589 | 0.0108752 | -2.13 |
| ILMN_1743324 | TBC1D12  | -0.08 | 6.63  | -3.15 | 0.002161  | 0.0108842 | -2.13 |
| ILMN_2391976 | SLC45A4  | 0.11  | 6.70  | 3.15  | 0.002162  | 0.0108876 | -2.13 |
| ILMN_1730007 | MPZL2    | -0.16 | 7.29  | -3.15 | 0.0021638 | 0.010895  | -2.13 |
| ILMN_2383163 | DEPDC7   | -0.10 | 6.70  | -3.15 | 0.0021659 | 0.0109044 | -2.14 |
| ILMN_3247023 | CASC15   | 0.09  | 6.74  | 3.15  | 0.0021687 | 0.0109169 | -2.14 |
| ILMN_1740418 | CYP27B1  | 0.09  | 6.57  | 3.15  | 0.0021698 | 0.0109205 | -2.14 |
| ILMN_2093343 | PLAC8    | -0.36 | 11.02 | -3.15 | 0.0021717 | 0.0109287 | -2.14 |
| ILMN_3192316 | CLEC2D   | 0.16  | 7.22  | 3.15  | 0.0021762 | 0.0109498 | -2.14 |
| ILMN_2340347 | PC       | -0.10 | 6.66  | -3.15 | 0.0021779 | 0.0109566 | -2.13 |
| ILMN_1784753 | PAIP2    | 0.16  | 9.85  | 3.15  | 0.0021798 | 0.0109647 | -2.14 |
| ILMN_1734707 | CHST13   | -0.22 | 6.91  | -3.15 | 0.0021811 | 0.0109695 | -2.14 |
| ILMN_2077886 | C1orf109 | 0.10  | 7.04  | 3.15  | 0.0021826 | 0.0109753 | -2.14 |
| ILMN_1653292 | PFKFB4   | -0.20 | 7.53  | -3.15 | 0.0021845 | 0.0109818 | -2.14 |
| ILMN_2169089 | C18orf54 | 0.09  | 6.58  | 3.15  | 0.0021843 | 0.0109818 | -2.14 |
| ILMN_2386053 | DACH1    | 0.08  | 6.41  | 3.15  | 0.002185  | 0.0109826 | -2.14 |
| ILMN_1812552 | ACER3    | 0.16  | 8.68  | 3.15  | 0.0021859 | 0.0109855 | -2.14 |
| ILMN_1661825 | TNFRSF6B | 0.16  | 6.49  | 3.15  | 0.0021866 | 0.0109874 | -2.14 |
| ILMN_1785892 | MASP1    | 0.09  | 6.40  | 3.15  | 0.0021904 | 0.0110052 | -2.15 |

|              |         |       |       |       |           |           |       |
|--------------|---------|-------|-------|-------|-----------|-----------|-------|
| ILMN_1736340 | ANGEL2  | -0.13 | 8.91  | -3.15 | 0.0021933 | 0.0110178 | -2.15 |
| ILMN_1812091 | FAM20A  | 0.09  | 6.51  | 3.15  | 0.002198  | 0.0110401 | -2.15 |
| ILMN_1789089 | DCTN1   | -0.07 | 6.42  | -3.14 | 0.0022008 | 0.0110522 | -2.15 |
| ILMN_1770641 | KLHL3   | 0.15  | 7.46  | 3.14  | 0.0022055 | 0.0110743 | -2.15 |
| ILMN_3247882 | ERI3    | -0.10 | 7.34  | -3.14 | 0.0022143 | 0.0111171 | -2.16 |
| ILMN_1764087 | SYPL1   | 0.20  | 9.53  | 3.14  | 0.0022161 | 0.0111244 | -2.16 |
| ILMN_1752502 | HKDC1   | 0.47  | 8.51  | 3.14  | 0.0022188 | 0.0111363 | -2.16 |
| ILMN_1724479 | NR2C2   | -0.10 | 7.06  | -3.14 | 0.0022212 | 0.0111465 | -2.16 |
| ILMN_1652762 | HIC2    | -0.10 | 7.26  | -3.14 | 0.0022225 | 0.0111518 | -2.16 |
| ILMN_1657977 | MSRB2   | -0.18 | 9.61  | -3.14 | 0.0022254 | 0.0111645 | -2.16 |
| ILMN_2377185 | TCEB2   | -0.12 | 7.08  | -3.14 | 0.0022272 | 0.0111713 | -2.16 |
| ILMN_3251383 | CCDC74B | 0.10  | 6.51  | 3.14  | 0.0022274 | 0.0111713 | -2.16 |
| ILMN_1681590 | LARP1   | 0.12  | 7.92  | 3.14  | 0.0022297 | 0.0111813 | -2.16 |
| ILMN_1798308 | AHSA2   | 0.18  | 9.05  | 3.14  | 0.0022317 | 0.0111899 | -2.16 |
| ILMN_1780693 | HSD3B1  | -0.08 | 6.43  | -3.14 | 0.0022343 | 0.011201  | -2.16 |
| ILMN_1663033 | TMEM129 | -0.11 | 6.80  | -3.14 | 0.0022349 | 0.0112025 | -2.16 |
| ILMN_2349071 | ADGRG2  | 0.12  | 6.43  | 3.14  | 0.0022358 | 0.0112052 | -2.16 |
| ILMN_1789349 | UBQLN4  | 0.13  | 8.77  | 3.14  | 0.0022398 | 0.0112236 | -2.17 |
| ILMN_1718734 | MLLT6   | -0.19 | 8.78  | -3.14 | 0.0022402 | 0.0112241 | -2.17 |
| ILMN_1655915 | MMP11   | -0.13 | 6.78  | -3.14 | 0.0022415 | 0.0112289 | -2.16 |
| ILMN_1815184 | ASPM    | 0.27  | 8.16  | 3.14  | 0.0022439 | 0.0112393 | -2.17 |
| ILMN_1772506 | ATP5I   | -0.15 | 8.19  | -3.14 | 0.0022444 | 0.0112402 | -2.17 |
| ILMN_1662318 | CCDC59  | 0.13  | 9.16  | 3.14  | 0.0022497 | 0.0112651 | -2.17 |
| ILMN_1756506 | TXLNGY  | 0.37  | 7.14  | 3.14  | 0.002252  | 0.0112748 | -2.17 |
| ILMN_1688279 | PVRIG   | 0.23  | 6.85  | 3.14  | 0.0022529 | 0.0112777 | -2.17 |
| ILMN_1708009 | LANCL2  | -0.12 | 7.16  | -3.14 | 0.002255  | 0.0112853 | -2.17 |
| ILMN_2153495 | WNT7B   | -0.09 | 6.65  | -3.14 | 0.0022549 | 0.0112853 | -2.17 |
| ILMN_3235065 | ZNHIT6  | 0.13  | 7.32  | 3.14  | 0.0022567 | 0.0112919 | -2.17 |
| ILMN_1777990 | NA      | -0.11 | 6.76  | -3.14 | 0.0022628 | 0.011321  | -2.18 |
| ILMN_1790778 | PNMA2   | 0.16  | 6.61  | 3.14  | 0.0022632 | 0.0113213 | -2.17 |
| ILMN_1769615 | FLRT2   | 0.13  | 6.93  | 3.14  | 0.002265  | 0.0113286 | -2.18 |
| ILMN_1657697 | SAR1A   | 0.14  | 8.09  | 3.14  | 0.0022656 | 0.01133   | -2.18 |
| ILMN_1788149 | NEK11   | 0.09  | 6.57  | 3.14  | 0.0022677 | 0.011339  | -2.18 |
| ILMN_1655341 | PLAC8L1 | -0.08 | 6.43  | -3.13 | 0.0022689 | 0.0113432 | -2.18 |
| ILMN_2408430 | LARGE   | -0.16 | 7.57  | -3.13 | 0.0022697 | 0.0113456 | -2.18 |
| ILMN_3264466 | MTFR1L  | -0.12 | 7.18  | -3.14 | 0.0022722 | 0.0113565 | -2.17 |
| ILMN_1803853 | NOL7    | 0.13  | 9.31  | 3.13  | 0.002276  | 0.0113738 | -2.18 |
| ILMN_2064694 | STIM1   | -0.16 | 7.43  | -3.13 | 0.0022784 | 0.0113842 | -2.18 |
| ILMN_3242120 | RAP1B   | 0.20  | 7.57  | 3.13  | 0.0022788 | 0.0113842 | -2.18 |
| ILMN_1726667 | NA      | -0.14 | 7.63  | -3.13 | 0.0022926 | 0.0114518 | -2.19 |
| ILMN_1860963 | NA      | -0.13 | 6.87  | -3.13 | 0.0022939 | 0.0114564 | -2.19 |
| ILMN_2258543 | PRDM2   | 0.07  | 6.56  | 3.13  | 0.0022957 | 0.0114638 | -2.19 |
| ILMN_1759952 | PSMA5   | 0.12  | 10.61 | 3.13  | 0.0022968 | 0.0114678 | -2.19 |
| ILMN_1768870 | CAPZA2  | 0.11  | 10.42 | 3.13  | 0.0022984 | 0.0114739 | -2.19 |
| ILMN_1728707 | COLQ    | -0.09 | 6.58  | -3.13 | 0.0023035 | 0.011498  | -2.19 |
| ILMN_1654540 | SEMA6D  | -0.15 | 7.51  | -3.13 | 0.0023057 | 0.011507  | -2.19 |
| ILMN_2279873 | WHAMM   | -0.12 | 7.22  | -3.13 | 0.0023079 | 0.0115165 | -2.19 |
| ILMN_1769556 | NPR3    | 0.07  | 6.33  | 3.13  | 0.0023084 | 0.0115173 | -2.19 |



|              |          |       |       |       |           |           |       |
|--------------|----------|-------|-------|-------|-----------|-----------|-------|
| ILMN_1794011 | CHST2    | 0.11  | 6.62  | 3.13  | 0.0023087 | 0.0115173 | -2.19 |
| ILMN_3224758 | TUBB     | 0.09  | 6.69  | 3.13  | 0.0023103 | 0.0115233 | -2.19 |
| ILMN_1760062 | IFI44    | 0.38  | 7.69  | 3.13  | 0.002311  | 0.0115252 | -2.19 |
| ILMN_2128741 | RDH11    | 0.15  | 7.53  | 3.13  | 0.0023114 | 0.0115255 | -2.19 |
| ILMN_1714417 | PSEN2    | -0.11 | 7.58  | -3.13 | 0.0023121 | 0.0115276 | -2.20 |
| ILMN_1765941 | ADGRG3   | 0.08  | 6.52  | 3.13  | 0.0023142 | 0.0115364 | -2.20 |
| ILMN_1738116 | TMEM119  | -0.26 | 8.26  | -3.13 | 0.002317  | 0.0115485 | -2.20 |
| ILMN_1729767 | TARBP2   | -0.09 | 6.87  | -3.13 | 0.0023207 | 0.0115654 | -2.19 |
| ILMN_1706225 | N4BP1    | -0.08 | 6.48  | -3.13 | 0.0023219 | 0.0115687 | -2.20 |
| ILMN_3241941 | SCARNA2  | 0.11  | 6.46  | 3.13  | 0.0023221 | 0.0115687 | -2.20 |
| ILMN_3287855 | NA       | -0.07 | 6.46  | -3.13 | 0.0023239 | 0.0115762 | -2.20 |
| ILMN_1664802 | WSB1     | 0.17  | 8.53  | 3.13  | 0.0023279 | 0.0115943 | -2.20 |
| ILMN_1805561 | SLC14A1  | -0.10 | 6.55  | -3.13 | 0.0023327 | 0.0116165 | -2.20 |
| ILMN_1707169 | AGMAT    | -0.13 | 6.96  | -3.13 | 0.0023346 | 0.0116246 | -2.20 |
| ILMN_3273047 | POLR3G   | 0.07  | 6.46  | 3.12  | 0.0023403 | 0.0116511 | -2.21 |
| ILMN_1753931 | CDO1     | 0.09  | 6.71  | 3.12  | 0.0023414 | 0.0116549 | -2.21 |
| ILMN_1894388 | NA       | -0.11 | 7.17  | -3.12 | 0.0023423 | 0.0116579 | -2.21 |
| ILMN_1716651 | RUNX2    | 0.16  | 6.84  | 3.13  | 0.0023453 | 0.011671  | -2.20 |
| ILMN_1721921 | BLMH     | 0.15  | 7.54  | 3.12  | 0.0023494 | 0.0116895 | -2.21 |
| ILMN_3248403 | SDHC     | -0.19 | 8.38  | -3.12 | 0.0023497 | 0.0116895 | -2.21 |
| ILMN_1712291 | MICALL2  | -0.14 | 7.09  | -3.12 | 0.0023552 | 0.011715  | -2.21 |
| ILMN_1736327 | CDC42EP3 | -0.10 | 6.68  | -3.12 | 0.0023572 | 0.0117233 | -2.21 |
| ILMN_1792748 | CPS1     | 0.66  | 7.26  | 3.12  | 0.0023575 | 0.0117234 | -2.21 |
| ILMN_1789482 | PRM3     | -0.08 | 6.37  | -3.12 | 0.0023594 | 0.011731  | -2.21 |
| ILMN_2159322 | SLK      | 0.21  | 8.49  | 3.12  | 0.0023642 | 0.0117532 | -2.21 |
| ILMN_1729691 | SLC16A6  | 0.11  | 6.56  | 3.12  | 0.002365  | 0.0117554 | -2.21 |
| ILMN_1686668 | GFM2     | -0.09 | 6.82  | -3.12 | 0.0023703 | 0.0117784 | -2.22 |
| ILMN_1826921 | NA       | 0.13  | 6.61  | 3.12  | 0.0023702 | 0.0117784 | -2.22 |
| ILMN_1696488 | FGF23    | -0.10 | 6.70  | -3.12 | 0.0023722 | 0.011786  | -2.22 |
| ILMN_1685037 | ASL      | -0.11 | 6.75  | -3.12 | 0.0023776 | 0.0118113 | -2.22 |
| ILMN_1751793 | PCNX2    | 0.08  | 6.39  | 3.12  | 0.0023803 | 0.011823  | -2.22 |
| ILMN_1690625 | SLC9A8   | -0.12 | 7.12  | -3.12 | 0.0023827 | 0.0118333 | -2.22 |
| ILMN_1713147 | MCRS1    | -0.09 | 6.67  | -3.12 | 0.0023843 | 0.0118393 | -2.22 |
| ILMN_1783998 | STARD5   | -0.10 | 6.61  | -3.12 | 0.0023879 | 0.0118538 | -2.22 |
| ILMN_1859946 | UHMK1    | -0.11 | 10.26 | -3.12 | 0.0023876 | 0.0118538 | -2.22 |
| ILMN_1770378 | ANAPC10  | 0.13  | 7.59  | 3.12  | 0.0023931 | 0.0118779 | -2.22 |
| ILMN_1813833 | NARFL    | -0.12 | 7.02  | -3.12 | 0.0023951 | 0.0118861 | -2.22 |
| ILMN_1681081 | AGPAT2   | -0.25 | 8.08  | -3.12 | 0.0023958 | 0.0118873 | -2.23 |
| ILMN_2409298 | NUSAP1   | 0.17  | 7.32  | 3.12  | 0.002396  | 0.0118873 | -2.23 |
| ILMN_1695821 | ACTR1B   | -0.11 | 8.16  | -3.12 | 0.002398  | 0.0118955 | -2.23 |
| ILMN_1657405 | SPPL3    | -0.11 | 6.82  | -3.12 | 0.0023992 | 0.0118998 | -2.23 |
| ILMN_2402930 | NA       | -0.12 | 12.59 | -3.12 | 0.0023999 | 0.0119016 | -2.23 |
| ILMN_1750805 | ARHGAP30 | 0.26  | 7.37  | 3.12  | 0.0024025 | 0.0119125 | -2.23 |
| ILMN_2382558 | NA       | -0.11 | 6.62  | -3.12 | 0.0024069 | 0.0119326 | -2.23 |
| ILMN_2376258 | SMARCA1  | 0.08  | 6.53  | 3.12  | 0.0024092 | 0.0119426 | -2.23 |
| ILMN_1707901 | DHRS7B   | -0.13 | 7.85  | -3.12 | 0.0024101 | 0.0119438 | -2.23 |
| ILMN_1737480 | NA       | -0.07 | 6.45  | -3.12 | 0.0024102 | 0.0119438 | -2.23 |
| ILMN_3199780 | CAP1     | 0.21  | 9.18  | 3.11  | 0.0024186 | 0.011984  | -2.24 |

|              |           |       |       |       |           |           |       |
|--------------|-----------|-------|-------|-------|-----------|-----------|-------|
| ILMN_2406304 | PDZRN3    | 0.14  | 6.75  | 3.11  | 0.0024196 | 0.0119872 | -2.23 |
| ILMN_2206716 | JTB       | -0.12 | 11.63 | -3.11 | 0.0024229 | 0.0120018 | -2.24 |
| ILMN_1772482 | SLC6A10P  | -0.10 | 6.44  | -3.11 | 0.0024239 | 0.0120049 | -2.24 |
| ILMN_1665871 | ANGEL1    | 0.12  | 7.22  | 3.11  | 0.0024248 | 0.0120058 | -2.24 |
| ILMN_1880612 | NA        | -0.09 | 6.67  | -3.11 | 0.0024247 | 0.0120058 | -2.24 |
| ILMN_1814924 | NXPE3     | 0.07  | 6.39  | 3.11  | 0.0024256 | 0.0120082 | -2.24 |
| ILMN_3251303 | NR2C2     | -0.13 | 7.14  | -3.11 | 0.0024288 | 0.0120225 | -2.24 |
| ILMN_1857915 | LINC00998 | 0.22  | 8.78  | 3.11  | 0.0024315 | 0.012034  | -2.24 |
| ILMN_1867439 | NA        | 0.15  | 6.87  | 3.11  | 0.0024326 | 0.0120374 | -2.24 |
| ILMN_1766363 | FLT3      | 0.08  | 6.46  | 3.11  | 0.0024352 | 0.012049  | -2.24 |
| ILMN_1797735 | C1orf21   | -0.17 | 7.44  | -3.11 | 0.0024366 | 0.0120538 | -2.24 |
| ILMN_1708340 | DAPK1     | 0.18  | 7.53  | 3.11  | 0.0024376 | 0.0120574 | -2.24 |
| ILMN_1741942 | STX16     | -0.23 | 8.98  | -3.11 | 0.002438  | 0.0120574 | -2.23 |
| ILMN_3251526 | USP13     | 0.13  | 6.98  | 3.11  | 0.0024421 | 0.0120761 | -2.25 |
| ILMN_1793287 | DEXI      | 0.13  | 9.07  | 3.11  | 0.0024431 | 0.0120792 | -2.25 |
| ILMN_1680682 | TADA2A    | 0.09  | 6.59  | 3.11  | 0.0024437 | 0.0120803 | -2.25 |
| ILMN_1769083 | GSTA3     | -0.09 | 6.50  | -3.11 | 0.0024481 | 0.0120992 | -2.24 |
| ILMN_2406586 | CC2D2A    | 0.12  | 6.75  | 3.11  | 0.0024482 | 0.0120992 | -2.25 |
| ILMN_1733680 | AZI2      | 0.13  | 7.68  | 3.11  | 0.0024486 | 0.0120993 | -2.25 |
| ILMN_1726457 | NA        | -0.07 | 6.57  | -3.11 | 0.0024503 | 0.0121063 | -2.25 |
| ILMN_1783333 | CMC2      | 0.13  | 9.66  | 3.11  | 0.0024515 | 0.0121102 | -2.25 |
| ILMN_3308936 | MIR223    | 0.08  | 6.41  | 3.11  | 0.0024534 | 0.012118  | -2.25 |
| ILMN_1762407 | CABLES2   | -0.11 | 6.89  | -3.11 | 0.0024571 | 0.0121345 | -2.25 |
| ILMN_1712231 | SH3YL1    | -0.21 | 8.06  | -3.11 | 0.0024616 | 0.0121536 | -2.25 |
| ILMN_1785284 | ALDH6A1   | -0.20 | 8.25  | -3.11 | 0.0024617 | 0.0121536 | -2.25 |
| ILMN_1751062 | SCARA5    | 0.31  | 7.69  | 3.11  | 0.0024622 | 0.0121543 | -2.25 |
| ILMN_1733875 | RUNDC1    | -0.12 | 8.47  | -3.11 | 0.0024646 | 0.0121627 | -2.25 |
| ILMN_3242186 | MLLT4-AS1 | -0.15 | 6.67  | -3.11 | 0.0024642 | 0.0121627 | -2.25 |
| ILMN_1802649 | C11orf58  | 0.07  | 6.47  | 3.11  | 0.0024739 | 0.012207  | -2.26 |
| ILMN_1652199 | NA        | 0.96  | 12.61 | 3.11  | 0.0024816 | 0.0122413 | -2.26 |
| ILMN_1803799 | EIF4E     | 0.20  | 8.23  | 3.11  | 0.0024813 | 0.0122413 | -2.26 |
| ILMN_1767960 | NSUN7     | -0.13 | 6.85  | -3.11 | 0.0024828 | 0.0122457 | -2.26 |
| ILMN_2199313 | NPDC1     | -0.21 | 7.48  | -3.11 | 0.0024871 | 0.0122651 | -2.26 |
| ILMN_1782037 | IGSF3     | -0.10 | 6.43  | -3.10 | 0.0024906 | 0.0122806 | -2.26 |
| ILMN_1742444 | UGT2B10   | -0.18 | 6.65  | -3.10 | 0.0024947 | 0.0122991 | -2.27 |
| ILMN_1689704 | TMEM5     | -0.18 | 8.20  | -3.10 | 0.0024983 | 0.0123148 | -2.27 |
| ILMN_2373495 | H2AFY     | -0.10 | 12.19 | -3.10 | 0.002503  | 0.0123365 | -2.27 |
| ILMN_2411511 | KLK12     | 0.09  | 6.35  | 3.10  | 0.0025109 | 0.0123736 | -2.27 |
| ILMN_2393254 | CAPNS1    | -0.18 | 8.86  | -3.10 | 0.0025121 | 0.0123777 | -2.27 |
| ILMN_3235472 | WDYHV1    | 0.08  | 6.88  | 3.10  | 0.0025154 | 0.0123924 | -2.27 |
| ILMN_2229922 | KIAA1551  | 0.24  | 9.00  | 3.10  | 0.0025181 | 0.0124038 | -2.27 |
| ILMN_1664610 | RPS17     | 0.13  | 12.85 | 3.10  | 0.0025209 | 0.0124121 | -2.27 |
| ILMN_2056032 | CD99      | 0.17  | 8.73  | 3.10  | 0.0025206 | 0.0124121 | -2.27 |
| ILMN_3239925 | PP7080    | -0.86 | 9.11  | -3.10 | 0.0025203 | 0.0124121 | -2.27 |
| ILMN_3288161 | RPS27     | 0.13  | 13.66 | 3.10  | 0.002525  | 0.0124309 | -2.28 |
| ILMN_1665797 | CSE1L     | 0.15  | 8.88  | 3.10  | 0.0025436 | 0.0125203 | -2.28 |
| ILMN_2412922 | ELMSAN1   | -0.13 | 7.26  | -3.10 | 0.0025485 | 0.0125426 | -2.28 |
| ILMN_1709484 | BLM       | 0.09  | 6.64  | 3.10  | 0.0025526 | 0.0125596 | -2.29 |

|              |          |       |       |       |           |           |       |
|--------------|----------|-------|-------|-------|-----------|-----------|-------|
| ILMN_2359456 | ERGIC3   | -0.15 | 8.61  | -3.10 | 0.0025525 | 0.0125596 | -2.29 |
| ILMN_2256765 | CDC16    | -0.15 | 9.78  | -3.10 | 0.002557  | 0.0125793 | -2.29 |
| ILMN_1652313 | RNF215   | 0.09  | 6.58  | 3.10  | 0.0025605 | 0.0125949 | -2.29 |
| ILMN_2387919 | PRKAG2   | 0.13  | 7.47  | 3.10  | 0.0025625 | 0.0126027 | -2.29 |
| ILMN_1669772 | LRP1     | 0.11  | 6.92  | 3.10  | 0.0025649 | 0.0126128 | -2.29 |
| ILMN_1756162 | EXOSC8   | 0.21  | 8.38  | 3.09  | 0.0025667 | 0.0126197 | -2.29 |
| ILMN_1740737 | DCPS     | 0.11  | 7.02  | 3.09  | 0.0025692 | 0.0126304 | -2.29 |
| ILMN_1682038 | SNORA25  | 0.16  | 8.43  | 3.09  | 0.0025702 | 0.0126334 | -2.29 |
| ILMN_1652754 | ZNF428   | 0.17  | 9.17  | 3.09  | 0.002575  | 0.0126549 | -2.29 |
| ILMN_1786936 | NA       | -0.08 | 6.53  | -3.09 | 0.0025766 | 0.012661  | -2.29 |
| ILMN_2364174 | CSNK1A1  | 0.10  | 6.94  | 3.09  | 0.0025771 | 0.0126618 | -2.29 |
| ILMN_1683664 | FAM60A   | 0.13  | 10.55 | 3.09  | 0.002578  | 0.0126644 | -2.30 |
| ILMN_1868047 | NA       | 0.08  | 6.53  | 3.09  | 0.0025833 | 0.0126888 | -2.29 |
| ILMN_1720437 | NA       | -0.07 | 6.42  | -3.09 | 0.0025843 | 0.0126916 | -2.30 |
| ILMN_1789999 | SLC30A7  | 0.14  | 9.73  | 3.09  | 0.0025856 | 0.0126962 | -2.30 |
| ILMN_1769839 | L1TD1    | 0.44  | 7.42  | 3.09  | 0.0025868 | 0.0127004 | -2.30 |
| ILMN_1815148 | MAN2A2   | -0.09 | 7.18  | -3.09 | 0.0025953 | 0.0127402 | -2.30 |
| ILMN_1673370 | FBXL5    | 0.12  | 6.81  | 3.09  | 0.0026002 | 0.0127626 | -2.30 |
| ILMN_2143148 | TM2D1    | -0.13 | 9.81  | -3.09 | 0.0026041 | 0.0127801 | -2.30 |
| ILMN_1703477 | ARHGEF2  | 0.19  | 10.28 | 3.09  | 0.0026054 | 0.0127842 | -2.30 |
| ILMN_2384140 | KLRC1    | -0.08 | 6.51  | -3.09 | 0.0026057 | 0.0127842 | -2.30 |
| ILMN_1753112 | CD5      | 0.12  | 6.51  | 3.09  | 0.0026073 | 0.01279   | -2.31 |
| ILMN_2182120 | SF3B6    | 0.15  | 8.35  | 3.09  | 0.0026135 | 0.0128186 | -2.31 |
| ILMN_1657153 | ACTR3    | 0.26  | 8.88  | 3.09  | 0.0026173 | 0.0128354 | -2.31 |
| ILMN_1679912 | DPH3     | 0.11  | 7.34  | 3.09  | 0.0026204 | 0.0128488 | -2.31 |
| ILMN_3250798 | C11orf58 | 0.08  | 6.63  | 3.09  | 0.0026212 | 0.012851  | -2.30 |
| ILMN_1712035 | TMEM115  | -0.11 | 7.94  | -3.09 | 0.0026219 | 0.0128527 | -2.31 |
| ILMN_1769478 | SPATA24  | -0.08 | 6.51  | -3.09 | 0.0026226 | 0.0128542 | -2.31 |
| ILMN_1725787 | RFX1     | -0.14 | 7.53  | -3.09 | 0.0026304 | 0.0128907 | -2.31 |
| ILMN_1677800 | SGTA     | 0.11  | 6.86  | 3.09  | 0.0026309 | 0.0128911 | -2.31 |
| ILMN_1668861 | TPI1     | -0.14 | 7.10  | -3.09 | 0.0026349 | 0.012909  | -2.32 |
| ILMN_1698246 | NA       | -0.12 | 6.80  | -3.09 | 0.0026355 | 0.0129102 | -2.32 |
| ILMN_1680928 | DNM3     | 0.11  | 6.57  | 3.09  | 0.0026429 | 0.0129429 | -2.32 |
| ILMN_1791679 | DNER     | 0.11  | 6.41  | 3.09  | 0.0026426 | 0.0129429 | -2.32 |
| ILMN_1711227 | GMDS     | 0.26  | 10.65 | 3.09  | 0.0026443 | 0.0129475 | -2.32 |
| ILMN_1785424 | ABLIM1   | 0.14  | 10.34 | 3.09  | 0.0026448 | 0.0129482 | -2.31 |
| ILMN_2168520 | C11orf70 | 0.11  | 6.50  | 3.08  | 0.0026457 | 0.0129511 | -2.32 |
| ILMN_1803213 | MXRA5    | 0.32  | 9.68  | 3.08  | 0.0026494 | 0.0129672 | -2.32 |
| ILMN_1737015 | RPL39    | 0.09  | 12.81 | 3.08  | 0.0026552 | 0.0129938 | -2.32 |
| ILMN_1747506 | DHX34    | -0.09 | 6.98  | -3.08 | 0.002658  | 0.0130054 | -2.32 |
| ILMN_1739576 | CYB5R2   | 0.11  | 7.03  | 3.08  | 0.0026645 | 0.0130355 | -2.33 |
| ILMN_1740185 | TPMT     | -0.24 | 9.72  | -3.08 | 0.0026707 | 0.0130638 | -2.33 |
| ILMN_1759173 | WWP2     | -0.08 | 6.41  | -3.08 | 0.0026715 | 0.0130662 | -2.32 |
| ILMN_1681798 | 6-Sep    | 0.11  | 6.62  | 3.08  | 0.0026733 | 0.0130709 | -2.33 |
| ILMN_1782688 | THNSL1   | -0.11 | 6.96  | -3.08 | 0.002673  | 0.0130709 | -2.33 |
| ILMN_2149782 | RAMP2    | 0.10  | 6.98  | 3.08  | 0.0026785 | 0.0130945 | -2.33 |
| ILMN_3306997 | METTL1   | 0.19  | 8.03  | 3.08  | 0.0026831 | 0.0131156 | -2.33 |
| ILMN_2402272 | TCEAL8   | 0.11  | 8.44  | 3.08  | 0.0026842 | 0.013119  | -2.33 |

|              |           |       |       |       |           |           |       |
|--------------|-----------|-------|-------|-------|-----------|-----------|-------|
| ILMN_2352921 | BPGM      | 0.09  | 6.77  | 3.08  | 0.0026856 | 0.0131239 | -2.33 |
| ILMN_1676411 | PMS2P2    | -0.10 | 6.73  | -3.08 | 0.0026912 | 0.0131484 | -2.33 |
| ILMN_1691811 | OR4C16    | -0.06 | 6.29  | -3.08 | 0.0026914 | 0.0131484 | -2.33 |
| ILMN_1712469 | NA        | 0.11  | 6.75  | 3.08  | 0.002692  | 0.0131495 | -2.33 |
| ILMN_1746027 | GNAL      | -0.11 | 6.64  | -3.08 | 0.002697  | 0.013172  | -2.34 |
| ILMN_1675992 | DST       | -0.10 | 6.58  | -3.08 | 0.0027002 | 0.0131857 | -2.34 |
| ILMN_3212395 | NA        | 0.38  | 7.26  | 3.08  | 0.0027013 | 0.0131894 | -2.34 |
| ILMN_1793559 | CEP85L    | 0.08  | 6.37  | 3.08  | 0.0027052 | 0.0132063 | -2.34 |
| ILMN_1695706 | H3F3B     | 0.18  | 9.48  | 3.08  | 0.0027081 | 0.0132186 | -2.33 |
| ILMN_1752967 | DHPS      | -0.09 | 7.77  | -3.08 | 0.0027114 | 0.0132331 | -2.34 |
| ILMN_1796678 | HBG1      | 0.14  | 6.45  | 3.08  | 0.0027174 | 0.0132605 | -2.34 |
| ILMN_1746986 | SLC39A3   | 0.08  | 6.53  | 3.08  | 0.0027206 | 0.0132723 | -2.34 |
| ILMN_2094776 | CCNL1     | 0.15  | 9.04  | 3.08  | 0.0027205 | 0.0132723 | -2.34 |
| ILMN_1760040 | NA        | -0.10 | 6.51  | -3.08 | 0.0027264 | 0.0132989 | -2.34 |
| ILMN_1706610 | PLEKHA8P1 | 0.11  | 6.78  | 3.07  | 0.0027292 | 0.0133107 | -2.35 |
| ILMN_1788701 | PSIP1     | 0.16  | 7.92  | 3.07  | 0.0027325 | 0.0133249 | -2.35 |
| ILMN_1681949 | PDGFRA    | 0.21  | 8.70  | 3.07  | 0.0027343 | 0.01333   | -2.35 |
| ILMN_1716080 | CBL       | 0.13  | 7.22  | 3.07  | 0.0027344 | 0.01333   | -2.35 |
| ILMN_1743130 | PTGFRN    | 0.16  | 8.33  | 3.07  | 0.0027367 | 0.0133396 | -2.35 |
| ILMN_1899760 | NA        | 0.10  | 6.66  | 3.07  | 0.0027381 | 0.0133446 | -2.34 |
| ILMN_1770678 | CBX2      | 0.11  | 6.48  | 3.07  | 0.0027494 | 0.0133977 | -2.35 |
| ILMN_1719649 | TMEM63A   | -0.15 | 7.46  | -3.07 | 0.0027567 | 0.0134315 | -2.36 |
| ILMN_1772667 | P2RY1     | -0.10 | 6.52  | -3.07 | 0.0027578 | 0.0134345 | -2.36 |
| ILMN_2128639 | PROSER2   | -0.12 | 6.90  | -3.07 | 0.0027629 | 0.0134575 | -2.36 |
| ILMN_2162234 | NEK1      | 0.11  | 7.11  | 3.07  | 0.0027648 | 0.0134651 | -2.36 |
| ILMN_1675520 | CPAMD8    | 0.08  | 6.36  | 3.07  | 0.0027655 | 0.0134668 | -2.36 |
| ILMN_1669032 | PPIC      | -0.21 | 9.13  | -3.07 | 0.0027667 | 0.0134707 | -2.36 |
| ILMN_1733998 | DHRS9     | 0.46  | 11.09 | 3.07  | 0.00277   | 0.0134846 | -2.36 |
| ILMN_1687589 | CPT1A     | -0.10 | 6.78  | -3.07 | 0.0027744 | 0.0135043 | -2.36 |
| ILMN_1669927 | ICOS      | 0.26  | 6.95  | 3.07  | 0.0027764 | 0.0135121 | -2.36 |
| ILMN_1700762 | PBX4      | 0.13  | 6.95  | 3.07  | 0.0027777 | 0.0135148 | -2.36 |
| ILMN_2311052 | COL13A1   | -0.13 | 6.92  | -3.07 | 0.0027777 | 0.0135148 | -2.36 |
| ILMN_1778111 | LINC01000 | -0.16 | 7.02  | -3.07 | 0.0027789 | 0.0135169 | -2.36 |
| ILMN_1786021 | PRKAB2    | -0.14 | 7.57  | -3.07 | 0.002779  | 0.0135169 | -2.36 |
| ILMN_2083588 | TTC32     | 0.19  | 7.34  | 3.07  | 0.0027902 | 0.0135686 | -2.37 |
| ILMN_2157421 | STUB1     | -0.15 | 8.11  | -3.07 | 0.0027904 | 0.0135686 | -2.37 |
| ILMN_1790575 | METTL13   | -0.11 | 7.50  | -3.07 | 0.0027961 | 0.0135947 | -2.37 |
| ILMN_1742382 | RIMS3     | -0.21 | 7.79  | -3.07 | 0.0027981 | 0.0136022 | -2.37 |
| ILMN_3240187 | EMC3      | -0.09 | 10.02 | -3.07 | 0.0027985 | 0.0136024 | -2.37 |
| ILMN_1781638 | HDDC3     | -0.13 | 7.61  | -3.07 | 0.0028062 | 0.0136376 | -2.37 |
| ILMN_1800626 | SESN1     | 0.16  | 7.92  | 3.06  | 0.002816  | 0.0136837 | -2.38 |
| ILMN_1704070 | NA        | -0.08 | 6.69  | -3.06 | 0.0028278 | 0.0137369 | -2.38 |
| ILMN_2255579 | RAB37     | -0.15 | 7.25  | -3.06 | 0.0028274 | 0.0137369 | -2.38 |
| ILMN_1667361 | COPZ2     | 0.08  | 6.54  | 3.06  | 0.0028344 | 0.0137671 | -2.38 |
| ILMN_1722855 | VEGFB     | 0.09  | 6.85  | 3.06  | 0.0028354 | 0.01377   | -2.38 |
| ILMN_2112988 | NCF1C     | 0.23  | 6.95  | 3.06  | 0.0028375 | 0.0137781 | -2.38 |
| ILMN_2134416 | DNAH12    | -0.07 | 6.26  | -3.06 | 0.0028414 | 0.0137931 | -2.38 |
| ILMN_2405233 | FAM133B   | 0.15  | 7.91  | 3.06  | 0.0028412 | 0.0137931 | -2.38 |

|              |          |       |       |       |           |           |       |
|--------------|----------|-------|-------|-------|-----------|-----------|-------|
| ILMN_2046856 | RPS15    | 0.12  | 12.49 | 3.06  | 0.0028418 | 0.0137932 | -2.38 |
| ILMN_1774127 | STAC     | 0.08  | 6.41  | 3.06  | 0.0028448 | 0.0138059 | -2.39 |
| ILMN_1781431 | GLCC1    | 0.14  | 6.71  | 3.06  | 0.0028465 | 0.0138123 | -2.39 |
| ILMN_2214603 | PPP2R3C  | 0.14  | 8.10  | 3.06  | 0.0028489 | 0.0138219 | -2.39 |
| ILMN_1744897 | KCNN3    | 0.09  | 6.48  | 3.06  | 0.0028503 | 0.0138268 | -2.39 |
| ILMN_1745570 | KLK7     | 0.17  | 6.52  | 3.06  | 0.0028513 | 0.0138295 | -2.39 |
| ILMN_1787750 | CD200    | 0.10  | 6.67  | 3.06  | 0.0028518 | 0.01383   | -2.38 |
| ILMN_2373982 | PICK1    | -0.13 | 7.76  | -3.06 | 0.0028542 | 0.0138398 | -2.39 |
| ILMN_3202710 | NA       | -0.09 | 6.41  | -3.06 | 0.0028558 | 0.0138455 | -2.38 |
| ILMN_1761314 | NFS1     | -0.09 | 6.59  | -3.06 | 0.0028574 | 0.0138514 | -2.39 |
| ILMN_1739521 | NLGN1    | 0.12  | 6.55  | 3.06  | 0.0028614 | 0.0138691 | -2.39 |
| ILMN_2341363 | ATP5A1   | -0.13 | 12.24 | -3.06 | 0.002869  | 0.0139039 | -2.39 |
| ILMN_2365307 | CD276    | 0.15  | 7.53  | 3.06  | 0.0028707 | 0.01391   | -2.39 |
| ILMN_1744109 | NA       | -0.09 | 6.83  | -3.06 | 0.0028732 | 0.0139204 | -2.39 |
| ILMN_1674228 | NA       | 0.95  | 10.82 | 3.06  | 0.0028755 | 0.0139293 | -2.39 |
| ILMN_1654778 | LSP1     | 0.15  | 6.76  | 3.06  | 0.0028847 | 0.0139721 | -2.40 |
| ILMN_1658053 | DYNLRB1  | -0.16 | 9.37  | -3.06 | 0.0028867 | 0.01398   | -2.40 |
| ILMN_1690822 | VAPA     | -0.13 | 7.08  | -3.06 | 0.0028901 | 0.013994  | -2.40 |
| ILMN_1680091 | POP7     | -0.11 | 7.10  | -3.06 | 0.0028941 | 0.0140119 | -2.40 |
| ILMN_1691930 | CBX6     | 0.21  | 7.83  | 3.06  | 0.0028961 | 0.0140176 | -2.40 |
| ILMN_1764871 | PIGP     | 0.19  | 8.72  | 3.06  | 0.0028959 | 0.0140176 | -2.40 |
| ILMN_3224820 | NA       | -0.08 | 6.41  | -3.05 | 0.0029038 | 0.0140528 | -2.40 |
| ILMN_2373515 | HSP90AA1 | 0.15  | 11.97 | 3.06  | 0.0029043 | 0.0140529 | -2.40 |
| ILMN_1653133 | SH3D19   | -0.18 | 9.26  | -3.06 | 0.0029075 | 0.0140668 | -2.39 |
| ILMN_3304405 | BBIP1    | 0.09  | 6.64  | 3.05  | 0.0029103 | 0.0140781 | -2.41 |
| ILMN_1698725 | FRMD3    | -0.19 | 7.72  | -3.05 | 0.0029123 | 0.0140857 | -2.41 |
| ILMN_1725946 | IRF6     | -0.12 | 7.48  | -3.05 | 0.0029221 | 0.0141313 | -2.40 |
| ILMN_1733094 | STEAP1   | 0.17  | 7.62  | 3.05  | 0.0029293 | 0.014164  | -2.41 |
| ILMN_1718853 | UQCRC2   | -0.17 | 9.33  | -3.05 | 0.0029325 | 0.0141757 | -2.41 |
| ILMN_2359453 | ERGIC3   | -0.14 | 10.39 | -3.05 | 0.0029321 | 0.0141757 | -2.41 |
| ILMN_1659727 | CDAN1    | -0.09 | 7.23  | -3.05 | 0.0029362 | 0.0141915 | -2.41 |
| ILMN_3243899 | TRIQQ    | -0.13 | 7.49  | -3.05 | 0.0029367 | 0.0141918 | -2.41 |
| ILMN_1716336 | CKAP5    | -0.08 | 6.72  | -3.05 | 0.0029384 | 0.0141984 | -2.42 |
| ILMN_1805481 | TRMT11   | 0.13  | 7.47  | 3.05  | 0.0029397 | 0.0142025 | -2.42 |
| ILMN_1676408 | TAGAP    | 0.09  | 6.47  | 3.05  | 0.0029441 | 0.0142219 | -2.42 |
| ILMN_2208903 | CD52     | 0.58  | 8.69  | 3.05  | 0.0029498 | 0.0142473 | -2.42 |
| ILMN_1717674 | PEPD     | 0.22  | 8.78  | 3.05  | 0.0029502 | 0.0142474 | -2.42 |
| ILMN_1741869 | WDR47    | 0.10  | 6.97  | 3.05  | 0.002953  | 0.0142568 | -2.42 |
| ILMN_1747504 | AHCTF1   | 0.11  | 7.16  | 3.05  | 0.0029528 | 0.0142568 | -2.42 |
| ILMN_1669709 | TMEM108  | 0.06  | 6.42  | 3.05  | 0.002955  | 0.0142643 | -2.42 |
| ILMN_1738558 | RGS20    | 0.14  | 6.33  | 3.05  | 0.0029554 | 0.0142645 | -2.42 |
| ILMN_1732328 | RPL22    | 0.16  | 11.84 | 3.05  | 0.0029591 | 0.0142791 | -2.42 |
| ILMN_1755536 | PFDN5    | 0.12  | 11.19 | 3.05  | 0.0029593 | 0.0142791 | -2.42 |
| ILMN_1798061 | ZFYVE26  | -0.11 | 8.23  | -3.05 | 0.002975  | 0.0143528 | -2.43 |
| ILMN_1727618 | NDUFAF6  | -0.13 | 7.46  | -3.05 | 0.0029777 | 0.014364  | -2.43 |
| ILMN_1665655 | CTDSPL2  | -0.10 | 7.00  | -3.05 | 0.0029794 | 0.0143703 | -2.42 |
| ILMN_2059780 | CYP4A22  | -0.07 | 6.25  | -3.05 | 0.00298   | 0.0143709 | -2.43 |
| ILMN_1684445 | FCRL5    | 0.19  | 6.91  | 3.04  | 0.0029922 | 0.0144278 | -2.43 |

|              |           |       |       |       |           |           |       |
|--------------|-----------|-------|-------|-------|-----------|-----------|-------|
| ILMN_1778358 | ATP8A1    | -0.19 | 7.09  | -3.04 | 0.002995  | 0.0144395 | -2.43 |
| ILMN_1664073 | NA        | 0.08  | 6.43  | 3.04  | 0.0029957 | 0.0144408 | -2.43 |
| ILMN_3241332 | MED18     | -0.11 | 6.65  | -3.04 | 0.0030026 | 0.0144719 | -2.43 |
| ILMN_2317730 | ELMO2     | 0.12  | 7.84  | 3.04  | 0.0030039 | 0.0144762 | -2.44 |
| ILMN_1813019 | DNAJB4    | 0.09  | 6.65  | 3.04  | 0.0030082 | 0.0144947 | -2.44 |
| ILMN_1749078 | TIMP2     | 0.13  | 6.78  | 3.04  | 0.0030097 | 0.0145002 | -2.44 |
| ILMN_2085525 | SNORA32   | 0.12  | 6.97  | 3.04  | 0.0030103 | 0.0145009 | -2.44 |
| ILMN_1785891 | PRKD1     | 0.16  | 6.76  | 3.04  | 0.0030113 | 0.0145037 | -2.44 |
| ILMN_1676515 | IMPDH1    | 0.18  | 7.74  | 3.04  | 0.0030189 | 0.0145384 | -2.44 |
| ILMN_1690105 | STAT1     | 0.26  | 8.29  | 3.04  | 0.0030303 | 0.0145909 | -2.44 |
| ILMN_2396982 | BCL2L12   | 0.16  | 7.78  | 3.04  | 0.0030354 | 0.0146137 | -2.44 |
| ILMN_1797005 | PGLS      | -0.12 | 8.19  | -3.04 | 0.0030386 | 0.0146268 | -2.45 |
| ILMN_1738699 | FXR2      | 0.11  | 7.02  | 3.04  | 0.0030423 | 0.0146427 | -2.45 |
| ILMN_1690099 | ITGB1BP1  | 0.21  | 8.74  | 3.04  | 0.0030432 | 0.0146451 | -2.45 |
| ILMN_1784436 | ARHGAP39  | -0.16 | 7.32  | -3.04 | 0.0030504 | 0.0146777 | -2.45 |
| ILMN_2267914 | CD68      | 0.16  | 6.92  | 3.04  | 0.0030513 | 0.01468   | -2.45 |
| ILMN_1742789 | LPXN      | 0.34  | 9.25  | 3.04  | 0.003052  | 0.0146802 | -2.44 |
| ILMN_2387742 | HNRNPA1L2 | 0.09  | 6.50  | 3.04  | 0.0030522 | 0.0146802 | -2.45 |
| ILMN_1746604 | IL6ST     | 0.07  | 6.36  | 3.04  | 0.0030541 | 0.0146875 | -2.45 |
| ILMN_2112524 | RNF149    | 0.15  | 7.31  | 3.04  | 0.0030623 | 0.0147249 | -2.45 |
| ILMN_1661293 | ZNF224    | -0.10 | 7.03  | -3.04 | 0.003077  | 0.0147933 | -2.46 |
| ILMN_1760360 | LTN1      | -0.11 | 8.23  | -3.04 | 0.0030798 | 0.0148047 | -2.46 |
| ILMN_1653711 | FZD2      | 0.09  | 6.56  | 3.03  | 0.0030805 | 0.014806  | -2.46 |
| ILMN_1794512 | ADPRH     | 0.09  | 6.69  | 3.03  | 0.0030824 | 0.014813  | -2.46 |
| ILMN_1728540 | FUNDC1    | -0.10 | 7.64  | -3.03 | 0.0030839 | 0.0148184 | -2.46 |
| ILMN_2294751 | ASCC3     | 0.12  | 7.15  | 3.04  | 0.0030907 | 0.0148487 | -2.45 |
| ILMN_3302177 | RPL14     | 0.19  | 11.62 | 3.03  | 0.003094  | 0.0148626 | -2.46 |
| ILMN_1779517 | RASEF     | -0.35 | 8.05  | -3.03 | 0.0030961 | 0.0148706 | -2.46 |
| ILMN_2180682 | NA        | 0.16  | 10.40 | 3.03  | 0.0030971 | 0.0148732 | -2.46 |
| ILMN_1653766 | CCL24     | 0.17  | 6.66  | 3.03  | 0.0031079 | 0.0149209 | -2.47 |
| ILMN_1779147 | ENC1      | 0.17  | 8.19  | 3.03  | 0.0031077 | 0.0149209 | -2.47 |
| ILMN_2329834 | RBM12     | 0.14  | 7.92  | 3.03  | 0.0031101 | 0.0149294 | -2.47 |
| ILMN_1673820 | HLTF      | 0.16  | 7.84  | 3.03  | 0.0031146 | 0.0149492 | -2.47 |
| ILMN_1672753 | NA        | -0.09 | 6.53  | -3.03 | 0.0031152 | 0.0149498 | -2.47 |
| ILMN_1651872 | UBIAD1    | 0.12  | 7.76  | 3.03  | 0.0031158 | 0.0149505 | -2.47 |
| ILMN_1704785 | FUOM      | 0.11  | 6.57  | 3.03  | 0.0031187 | 0.0149603 | -2.46 |
| ILMN_2054362 | SLC25A40  | -0.13 | 7.13  | -3.03 | 0.0031185 | 0.0149603 | -2.47 |
| ILMN_1772964 | CCL8      | 0.48  | 7.78  | 3.03  | 0.0031277 | 0.0150015 | -2.47 |
| ILMN_1690371 | MRPL11    | -0.19 | 8.60  | -3.03 | 0.0031286 | 0.0150016 | -2.46 |
| ILMN_2108590 | THSD7B    | -0.08 | 6.31  | -3.03 | 0.0031282 | 0.0150016 | -2.47 |
| ILMN_1784005 | RAB13     | 0.14  | 7.26  | 3.03  | 0.0031293 | 0.0150028 | -2.47 |
| ILMN_1676978 | NA        | -0.07 | 6.46  | -3.03 | 0.003131  | 0.0150031 | -2.47 |
| ILMN_1688205 | KLK10     | 0.14  | 6.48  | 3.03  | 0.0031311 | 0.0150031 | -2.47 |
| ILMN_1720531 | KDM4B     | -0.10 | 6.74  | -3.03 | 0.003131  | 0.0150031 | -2.47 |
| ILMN_1726239 | TBCA      | 0.19  | 10.87 | 3.03  | 0.0031298 | 0.0150031 | -2.47 |
| ILMN_1679995 | MPP6      | 0.10  | 6.52  | 3.03  | 0.0031323 | 0.015007  | -2.47 |
| ILMN_1666376 | TRIM56    | -0.14 | 7.42  | -3.03 | 0.0031333 | 0.0150098 | -2.47 |
| ILMN_2387995 | ANTXR1    | 0.08  | 6.61  | 3.03  | 0.0031373 | 0.0150264 | -2.47 |

|              |           |       |       |       |           |           |       |
|--------------|-----------|-------|-------|-------|-----------|-----------|-------|
| ILMN_1662686 | USPL1     | 0.13  | 7.63  | 3.03  | 0.00314   | 0.0150377 | -2.48 |
| ILMN_2334531 | GJB3      | 0.20  | 6.92  | 3.03  | 0.0031482 | 0.0150748 | -2.48 |
| ILMN_2293529 | AKAP7     | -0.09 | 6.33  | -3.03 | 0.0031501 | 0.0150817 | -2.47 |
| ILMN_1734596 | TC2N      | 0.18  | 7.68  | 3.03  | 0.0031514 | 0.0150838 | -2.48 |
| ILMN_1761068 | NA        | -0.14 | 7.96  | -3.03 | 0.0031511 | 0.0150838 | -2.48 |
| ILMN_2149053 | RIF1      | 0.13  | 7.15  | 3.03  | 0.003158  | 0.0151132 | -2.48 |
| ILMN_1815063 | PXK       | 0.10  | 6.68  | 3.03  | 0.0031586 | 0.0151137 | -2.48 |
| ILMN_1723358 | SCARA3    | 0.11  | 6.62  | 3.03  | 0.0031609 | 0.015122  | -2.48 |
| ILMN_3182069 | NA        | 0.09  | 6.63  | 3.03  | 0.0031612 | 0.015122  | -2.48 |
| ILMN_1738223 | LINC00574 | -0.07 | 6.39  | -3.03 | 0.0031634 | 0.0151307 | -2.48 |
| ILMN_1807304 | MBNL1     | 0.16  | 9.43  | 3.03  | 0.0031669 | 0.0151451 | -2.48 |
| ILMN_1789508 | GTF3C3    | 0.12  | 8.24  | 3.03  | 0.003169  | 0.0151534 | -2.48 |
| ILMN_1672759 | MCU       | -0.15 | 8.36  | -3.03 | 0.0031737 | 0.0151733 | -2.49 |
| ILMN_3266944 | RPS29     | 0.18  | 8.13  | 3.02  | 0.0031752 | 0.0151786 | -2.49 |
| ILMN_1653182 | PMS2P1    | -0.08 | 6.50  | -3.02 | 0.0031787 | 0.0151909 | -2.49 |
| ILMN_1763695 | C9orf24   | -0.10 | 6.76  | -3.02 | 0.0031785 | 0.0151909 | -2.49 |
| ILMN_1776552 | FUBP1     | 0.09  | 6.77  | 3.02  | 0.0031791 | 0.0151909 | -2.49 |
| ILMN_1810085 | ABCF3     | 0.09  | 6.73  | 3.02  | 0.0031811 | 0.0151985 | -2.49 |
| ILMN_1812489 | CEP85     | -0.11 | 6.98  | -3.02 | 0.0031848 | 0.0152142 | -2.49 |
| ILMN_1728934 | PRC1      | 0.26  | 8.42  | 3.02  | 0.0031874 | 0.0152244 | -2.49 |
| ILMN_1657888 | SALL1     | 0.08  | 6.33  | 3.02  | 0.0031971 | 0.0152685 | -2.49 |
| ILMN_1697006 | NA        | -0.10 | 7.08  | -3.02 | 0.0031976 | 0.0152687 | -2.49 |
| ILMN_2072603 | MRPL14    | -0.13 | 8.94  | -3.02 | 0.0031992 | 0.0152745 | -2.49 |
| ILMN_3235113 | TOMM6     | 0.13  | 9.90  | 3.02  | 0.0032021 | 0.0152858 | -2.49 |
| ILMN_1659801 | ATP6V1C1  | 0.11  | 7.61  | 3.02  | 0.0032037 | 0.0152915 | -2.49 |
| ILMN_1684045 | CDCA4     | 0.12  | 6.98  | 3.02  | 0.0032048 | 0.0152948 | -2.49 |
| ILMN_3305304 | POLD2     | -0.13 | 7.79  | -3.02 | 0.0032064 | 0.0153002 | -2.49 |
| ILMN_3184670 | SLC6A19   | -0.10 | 6.41  | -3.02 | 0.0032078 | 0.0153048 | -2.49 |
| ILMN_1738677 | PRPF8     | 0.11  | 9.76  | 3.02  | 0.0032133 | 0.0153288 | -2.50 |
| ILMN_2407168 | S100A13   | 0.17  | 8.72  | 3.02  | 0.0032153 | 0.0153365 | -2.50 |
| ILMN_1667418 | TMEM114   | -0.14 | 7.40  | -3.02 | 0.0032177 | 0.0153455 | -2.50 |
| ILMN_1724406 | INO80E    | -0.14 | 7.96  | -3.02 | 0.0032213 | 0.0153606 | -2.50 |
| ILMN_1809844 | NA        | -0.08 | 6.64  | -3.02 | 0.0032235 | 0.0153688 | -2.50 |
| ILMN_2224486 | C3orf14   | -0.17 | 7.23  | -3.02 | 0.0032253 | 0.0153753 | -2.50 |
| ILMN_1799579 | CCDC51    | -0.10 | 7.17  | -3.02 | 0.0032352 | 0.0154205 | -2.50 |
| ILMN_1785324 | MTHFD1    | 0.09  | 6.74  | 3.02  | 0.0032368 | 0.0154261 | -2.50 |
| ILMN_1685042 | TNS2      | 0.09  | 6.61  | 3.02  | 0.0032379 | 0.0154293 | -2.50 |
| ILMN_1680348 | NBPF3     | 0.11  | 6.81  | 3.02  | 0.0032503 | 0.0154862 | -2.51 |
| ILMN_1765704 | CDK11B    | -0.14 | 7.37  | -3.02 | 0.0032599 | 0.0155294 | -2.51 |
| ILMN_1705676 | MRAP      | 0.06  | 6.37  | 3.01  | 0.0032756 | 0.0156021 | -2.51 |
| ILMN_1715401 | MT1G      | -0.65 | 11.66 | -3.01 | 0.0032791 | 0.0156169 | -2.52 |
| ILMN_3246957 | PIK3R6    | 0.07  | 6.53  | 3.01  | 0.0032807 | 0.0156222 | -2.52 |
| ILMN_1683798 | HOXB-AS3  | -0.10 | 6.58  | -3.01 | 0.0032837 | 0.0156345 | -2.52 |
| ILMN_1815548 | OR52D1    | 0.07  | 6.30  | 3.01  | 0.0032846 | 0.0156366 | -2.52 |
| ILMN_2389347 | NR3C1     | 0.09  | 6.63  | 3.01  | 0.0032945 | 0.0156813 | -2.52 |
| ILMN_1690706 | SNRPB2    | 0.12  | 9.94  | 3.01  | 0.0032964 | 0.0156882 | -2.52 |
| ILMN_1691526 | MAPKAP1   | -0.13 | 6.95  | -3.01 | 0.0032988 | 0.0156979 | -2.52 |
| ILMN_2381834 | TRIM69    | 0.08  | 6.38  | 3.01  | 0.0033038 | 0.0157192 | -2.52 |

|              |          |       |       |       |           |           |       |
|--------------|----------|-------|-------|-------|-----------|-----------|-------|
| ILMN_2312764 | AJAP1    | 0.10  | 6.65  | 3.01  | 0.0033093 | 0.0157435 | -2.52 |
| ILMN_2339202 | KTN1     | -0.24 | 9.07  | -3.01 | 0.0033105 | 0.0157467 | -2.52 |
| ILMN_2391522 | MRPL47   | -0.10 | 7.39  | -3.01 | 0.0033109 | 0.0157467 | -2.52 |
| ILMN_2347380 | ARHGEF11 | -0.14 | 6.97  | -3.01 | 0.0033136 | 0.0157574 | -2.52 |
| ILMN_1782621 | RPS12    | 0.11  | 13.55 | 3.01  | 0.003318  | 0.0157762 | -2.53 |
| ILMN_1781952 | MGST1    | -0.25 | 8.33  | -3.01 | 0.0033199 | 0.0157829 | -2.53 |
| ILMN_2258409 | P2RY14   | 0.09  | 6.44  | 3.01  | 0.0033249 | 0.0158046 | -2.53 |
| ILMN_1683415 | CAMK2D   | -0.11 | 7.20  | -3.01 | 0.0033286 | 0.0158177 | -2.53 |
| ILMN_1758093 | TMEM260  | -0.11 | 6.75  | -3.01 | 0.0033285 | 0.0158177 | -2.53 |
| ILMN_2100209 | NA       | 0.31  | 6.97  | 3.01  | 0.0033301 | 0.0158225 | -2.53 |
| ILMN_1793072 | NA       | -0.10 | 6.36  | -3.01 | 0.0033319 | 0.0158288 | -2.53 |
| ILMN_1764861 | ISOC1    | -0.15 | 8.70  | -3.01 | 0.0033345 | 0.0158349 | -2.53 |
| ILMN_3307799 | PSMD4    | 0.14  | 7.92  | 3.01  | 0.0033344 | 0.0158349 | -2.53 |
| ILMN_3309759 | VTRNA1-1 | 0.17  | 6.64  | 3.01  | 0.0033344 | 0.0158349 | -2.53 |
| ILMN_1737813 | ERI3     | -0.11 | 7.58  | -3.01 | 0.0033359 | 0.0158394 | -2.53 |
| ILMN_1805027 | KLC3     | -0.08 | 6.41  | -3.01 | 0.0033396 | 0.0158548 | -2.53 |
| ILMN_1689129 | OPRM1    | -0.07 | 6.43  | -3.01 | 0.0033411 | 0.0158593 | -2.53 |
| ILMN_1795428 | WDR59    | -0.12 | 8.81  | -3.01 | 0.0033502 | 0.0159006 | -2.53 |
| ILMN_1860084 | NA       | -0.14 | 7.23  | -3.01 | 0.0033521 | 0.0159072 | -2.54 |
| ILMN_1700042 | TLN2     | -0.14 | 7.58  | -3.01 | 0.0033556 | 0.0159218 | -2.54 |
| ILMN_1697559 | G6PD     | 0.09  | 6.81  | 3.01  | 0.0033572 | 0.0159271 | -2.54 |
| ILMN_1658425 | DAG1     | -0.11 | 8.41  | -3.01 | 0.0033704 | 0.0159875 | -2.54 |
| ILMN_2140510 | KLHL13   | 0.11  | 6.70  | 3.00  | 0.0033751 | 0.0160076 | -2.54 |
| ILMN_1752932 | MPZL2    | -0.22 | 10.48 | -3.00 | 0.0033809 | 0.0160332 | -2.54 |
| ILMN_1682180 | VCPIP1   | 0.11  | 7.80  | 3.00  | 0.0033853 | 0.0160518 | -2.54 |
| ILMN_1777344 | RPS13    | 0.13  | 12.26 | 3.00  | 0.0033923 | 0.0160826 | -2.55 |
| ILMN_1679093 | ZNF581   | 0.16  | 7.82  | 3.00  | 0.0033946 | 0.0160892 | -2.55 |
| ILMN_1770922 | TMEM45A  | 0.12  | 6.82  | 3.00  | 0.0033942 | 0.0160892 | -2.54 |
| ILMN_1730611 | RTN4     | 0.11  | 11.12 | 3.00  | 0.0033992 | 0.0161087 | -2.55 |
| ILMN_1774427 | CALCOCO1 | 0.10  | 6.94  | 3.00  | 0.0034059 | 0.0161385 | -2.55 |
| ILMN_1698218 | TRAF1    | 0.11  | 6.73  | 3.00  | 0.0034088 | 0.0161481 | -2.55 |
| ILMN_1805535 | VRK3     | -0.10 | 6.72  | -3.00 | 0.0034089 | 0.0161481 | -2.55 |
| ILMN_1691884 | STC2     | 0.13  | 6.70  | 3.00  | 0.0034191 | 0.0161939 | -2.55 |
| ILMN_1651584 | NA       | 0.09  | 6.45  | 3.00  | 0.0034221 | 0.0162061 | -2.55 |
| ILMN_2060086 | ADAM23   | 0.08  | 6.38  | 3.00  | 0.0034232 | 0.016209  | -2.55 |
| ILMN_1708391 | NR1H4    | 0.49  | 7.24  | 3.00  | 0.0034275 | 0.0162271 | -2.56 |
| ILMN_1738866 | DEXI     | 0.12  | 8.06  | 3.00  | 0.0034281 | 0.016228  | -2.56 |
| ILMN_1748438 | POLR2G   | 0.14  | 9.72  | 3.00  | 0.0034305 | 0.0162369 | -2.56 |
| ILMN_2365686 | ALG8     | 0.12  | 7.90  | 3.00  | 0.0034321 | 0.0162424 | -2.56 |
| ILMN_1684956 | ARSD     | -0.11 | 6.62  | -3.00 | 0.0034381 | 0.0162686 | -2.56 |
| ILMN_1781457 | TIPRL    | -0.15 | 8.13  | -3.00 | 0.0034413 | 0.0162812 | -2.56 |
| ILMN_1681356 | PDE2A    | 0.09  | 6.51  | 3.00  | 0.0034486 | 0.0163134 | -2.56 |
| ILMN_1773485 | QKI      | 0.09  | 6.56  | 3.00  | 0.0034515 | 0.0163252 | -2.56 |
| ILMN_2261784 | CCNY     | -0.19 | 8.93  | -3.00 | 0.0034544 | 0.0163368 | -2.56 |
| ILMN_1763002 | NA       | -0.08 | 6.57  | -3.00 | 0.0034573 | 0.0163477 | -2.56 |
| ILMN_2326509 | CASP1    | 0.26  | 8.95  | 3.00  | 0.0034577 | 0.0163477 | -2.56 |
| ILMN_1697289 | ZNF713   | -0.10 | 6.55  | -3.00 | 0.0034654 | 0.0163817 | -2.57 |
| ILMN_1686535 | SLC37A3  | -0.10 | 6.73  | -3.00 | 0.0034698 | 0.0164005 | -2.57 |



|              |            |       |       |       |           |           |       |
|--------------|------------|-------|-------|-------|-----------|-----------|-------|
| ILMN_1654165 | SLC45A2    | -0.09 | 6.51  | -3.00 | 0.0034711 | 0.0164044 | -2.57 |
| ILMN_1708006 | MICB       | 0.14  | 6.79  | 3.00  | 0.0034735 | 0.0164136 | -2.57 |
| ILMN_2087303 | XKR8       | -0.10 | 6.98  | -2.99 | 0.0034766 | 0.0164258 | -2.57 |
| ILMN_1714335 | RDH10      | 0.19  | 8.40  | 2.99  | 0.0034772 | 0.0164262 | -2.57 |
| ILMN_1659601 | CCL26      | 0.15  | 6.57  | 2.99  | 0.0034778 | 0.0164269 | -2.57 |
| ILMN_1814333 | SERPINI1   | 0.11  | 6.83  | 2.99  | 0.0034861 | 0.0164639 | -2.57 |
| ILMN_1811437 | MYRF       | 0.12  | 6.70  | 2.99  | 0.0034937 | 0.0164977 | -2.57 |
| ILMN_1673252 | AIMP2      | -0.17 | 9.45  | -2.99 | 0.003496  | 0.0165061 | -2.57 |
| ILMN_2145518 | TMEM126B   | -0.10 | 10.03 | -2.99 | 0.0034977 | 0.016512  | -2.57 |
| ILMN_1666222 | PHACTR3    | 0.14  | 6.52  | 2.99  | 0.0035002 | 0.0165216 | -2.58 |
| ILMN_2150851 | SERPINB2   | 0.20  | 6.55  | 2.99  | 0.0035097 | 0.0165639 | -2.58 |
| ILMN_1657796 | STMN1      | 0.16  | 7.38  | 2.99  | 0.0035131 | 0.0165758 | -2.58 |
| ILMN_2251452 | RPS6KA1    | -0.08 | 6.52  | -2.99 | 0.0035132 | 0.0165758 | -2.58 |
| ILMN_1813911 | HEXA       | 0.07  | 6.37  | 2.99  | 0.0035151 | 0.0165829 | -2.58 |
| ILMN_1728305 | PUM2       | -0.11 | 9.20  | -2.99 | 0.0035167 | 0.0165881 | -2.58 |
| ILMN_1675501 | SENP5      | 0.11  | 6.87  | 2.99  | 0.0035185 | 0.0165944 | -2.58 |
| ILMN_1813379 | TNFRSF9    | 0.11  | 6.50  | 2.99  | 0.0035205 | 0.0166015 | -2.58 |
| ILMN_2312498 | SEMG1      | 0.09  | 6.40  | 2.99  | 0.0035221 | 0.0166068 | -2.58 |
| ILMN_3239272 | SNORD71    | 0.10  | 6.51  | 2.99  | 0.0035245 | 0.0166159 | -2.58 |
| ILMN_1752562 | CXCL5      | 0.14  | 6.48  | 2.99  | 0.0035266 | 0.0166235 | -2.58 |
| ILMN_1658957 | NA         | -0.12 | 6.98  | -2.99 | 0.0035321 | 0.0166472 | -2.58 |
| ILMN_1737728 | CDCA3      | 0.11  | 6.68  | 2.99  | 0.0035346 | 0.0166566 | -2.58 |
| ILMN_1771903 | NUP37      | 0.15  | 8.64  | 2.99  | 0.0035356 | 0.0166591 | -2.58 |
| ILMN_3199798 | RPL10      | 0.14  | 13.48 | 2.99  | 0.0035406 | 0.0166804 | -2.59 |
| ILMN_1729130 | TMEM248    | 0.12  | 8.02  | 2.99  | 0.0035428 | 0.0166884 | -2.59 |
| ILMN_1722673 | PCDHB4     | 0.10  | 6.61  | 2.99  | 0.0035445 | 0.0166941 | -2.59 |
| ILMN_2064902 | HAND2      | 0.11  | 6.67  | 2.99  | 0.0035526 | 0.0167298 | -2.59 |
| ILMN_2127328 | PURA       | -0.11 | 8.05  | -2.99 | 0.0035537 | 0.0167326 | -2.59 |
| ILMN_1678353 | FARP1      | -0.17 | 8.00  | -2.99 | 0.0035557 | 0.01674   | -2.59 |
| ILMN_3245879 | FAM13A-AS1 | -0.08 | 6.76  | -2.99 | 0.0035585 | 0.0167509 | -2.59 |
| ILMN_2126038 | STMN2      | 0.27  | 8.13  | 2.99  | 0.0035668 | 0.0167875 | -2.59 |
| ILMN_1885728 | KIAA1147   | -0.10 | 6.98  | -2.99 | 0.0035722 | 0.0168105 | -2.59 |
| ILMN_1772286 | OCIAD2     | 0.23  | 8.93  | 2.99  | 0.003576  | 0.0168265 | -2.59 |
| ILMN_1729417 | GNE        | -0.26 | 9.87  | -2.99 | 0.0035771 | 0.0168292 | -2.59 |
| ILMN_1660579 | CRLF3      | 0.14  | 7.11  | 2.98  | 0.0035809 | 0.0168445 | -2.60 |
| ILMN_1655296 | UTRN       | 0.10  | 6.76  | 2.98  | 0.0035902 | 0.0168841 | -2.60 |
| ILMN_1658579 | NA         | -0.14 | 7.28  | -2.98 | 0.0035899 | 0.0168841 | -2.60 |
| ILMN_1738821 | GOLGA2     | -0.10 | 7.41  | -2.98 | 0.0035963 | 0.016908  | -2.60 |
| ILMN_1767433 | TBC1D5     | -0.12 | 6.79  | -2.98 | 0.0035961 | 0.016908  | -2.60 |
| ILMN_1889752 | SMIM13     | 0.12  | 6.75  | 2.98  | 0.0035971 | 0.0169094 | -2.60 |
| ILMN_1691747 | KHDRBS3    | -0.19 | 7.87  | -2.98 | 0.0036009 | 0.0169248 | -2.60 |
| ILMN_2160209 | EPCAM      | -0.31 | 10.31 | -2.98 | 0.0036023 | 0.0169293 | -2.60 |
| ILMN_2383707 | ALDH1A2    | 0.10  | 6.53  | 2.98  | 0.0036065 | 0.0169466 | -2.60 |
| ILMN_2191402 | H LCS      | 0.07  | 6.38  | 2.98  | 0.0036095 | 0.0169584 | -2.60 |
| ILMN_1733515 | LOXL3      | 0.08  | 6.51  | 2.98  | 0.0036103 | 0.0169588 | -2.60 |
| ILMN_3236825 | RAPGEF5    | -0.15 | 8.23  | -2.98 | 0.0036106 | 0.0169588 | -2.60 |
| ILMN_2400663 | AKAP9      | -0.08 | 6.30  | -2.98 | 0.0036127 | 0.0169665 | -2.60 |
| ILMN_2321451 | HNRNPD     | 0.14  | 11.38 | 2.98  | 0.0036134 | 0.0169674 | -2.60 |

|              |          |       |       |       |           |           |       |
|--------------|----------|-------|-------|-------|-----------|-----------|-------|
| ILMN_2285996 | KIAA0101 | 0.24  | 7.83  | 2.98  | 0.0036187 | 0.0169901 | -2.61 |
| ILMN_1824297 | NA       | -0.11 | 6.96  | -2.98 | 0.0036201 | 0.0169944 | -2.61 |
| ILMN_1657505 | HR       | -0.08 | 6.48  | -2.98 | 0.0036243 | 0.0170119 | -2.61 |
| ILMN_1711171 | CREB3L4  | -0.10 | 6.63  | -2.98 | 0.0036267 | 0.0170209 | -2.61 |
| ILMN_1792404 | TM4SF4   | 0.70  | 7.13  | 2.98  | 0.0036351 | 0.0170578 | -2.61 |
| ILMN_1793959 | ADPGK    | 0.13  | 8.09  | 2.98  | 0.003642  | 0.0170878 | -2.61 |
| ILMN_1719392 | FH       | -0.16 | 9.55  | -2.98 | 0.003646  | 0.0171044 | -2.61 |
| ILMN_2101930 | POLG     | -0.12 | 7.92  | -2.98 | 0.0036487 | 0.0171146 | -2.61 |
| ILMN_1660732 | PPP2R2B  | 0.13  | 6.74  | 2.98  | 0.0036672 | 0.0171991 | -2.62 |
| ILMN_1907042 | NA       | -0.15 | 7.45  | -2.98 | 0.0036681 | 0.0172008 | -2.62 |
| ILMN_1674282 | PPARD    | 0.16  | 7.26  | 2.98  | 0.0036725 | 0.0172195 | -2.62 |
| ILMN_1775012 | BBS7     | 0.09  | 6.95  | 2.98  | 0.0036745 | 0.0172262 | -2.62 |
| ILMN_1798204 | IL21R    | 0.15  | 6.49  | 2.98  | 0.0036781 | 0.017241  | -2.62 |
| ILMN_1773865 | HSPA5    | 0.22  | 8.55  | 2.98  | 0.0036815 | 0.0172543 | -2.62 |
| ILMN_3288587 | RNF181   | -0.13 | 8.41  | -2.98 | 0.0036835 | 0.0172615 | -2.62 |
| ILMN_1756573 | NDUFA4L2 | 0.10  | 6.67  | 2.98  | 0.0036852 | 0.017267  | -2.62 |
| ILMN_2189936 | RPL36AL  | 0.12  | 12.28 | 2.98  | 0.0036859 | 0.0172681 | -2.62 |
| ILMN_1815308 | SDC1     | -0.25 | 9.82  | -2.98 | 0.0036871 | 0.0172712 | -2.62 |
| ILMN_1709399 | SLC25A34 | -0.26 | 7.44  | -2.97 | 0.0036916 | 0.0172864 | -2.62 |
| ILMN_1796136 | RAB37    | -0.09 | 6.66  | -2.98 | 0.0036918 | 0.0172864 | -2.62 |
| ILMN_2311020 | DNAJC12  | 0.26  | 7.52  | 2.98  | 0.0036916 | 0.0172864 | -2.62 |
| ILMN_2362974 | CASP7    | -0.26 | 7.09  | -2.97 | 0.0036924 | 0.0172866 | -2.62 |
| ILMN_2283325 | WLS      | -0.19 | 9.71  | -2.97 | 0.003699  | 0.0173154 | -2.63 |
| ILMN_1679731 | SLC15A4  | 0.12  | 7.42  | 2.97  | 0.0036998 | 0.0173166 | -2.63 |
| ILMN_1813572 | IL16     | 0.11  | 6.69  | 2.97  | 0.0037169 | 0.0173944 | -2.63 |
| ILMN_1768732 | SPAG16   | -0.16 | 7.40  | -2.97 | 0.0037209 | 0.0174107 | -2.63 |
| ILMN_1746368 | SELT     | -0.12 | 8.37  | -2.97 | 0.0037222 | 0.0174145 | -2.63 |
| ILMN_1765773 | DTHD1    | 0.07  | 6.47  | 2.97  | 0.0037268 | 0.0174334 | -2.63 |
| ILMN_1746085 | IGFBP3   | -0.28 | 9.10  | -2.97 | 0.0037277 | 0.0174355 | -2.63 |
| ILMN_1716736 | CD80     | 0.09  | 6.59  | 2.97  | 0.0037344 | 0.0174642 | -2.62 |
| ILMN_1734194 | EXOSC3   | 0.11  | 7.75  | 2.97  | 0.003735  | 0.0174649 | -2.63 |
| ILMN_1710209 | MFSD6    | 0.18  | 8.94  | 2.97  | 0.0037395 | 0.0174834 | -2.64 |
| ILMN_3187623 | SYCE1L   | -0.10 | 6.59  | -2.97 | 0.0037429 | 0.0174971 | -2.63 |
| ILMN_1795407 | NA       | -0.09 | 6.85  | -2.97 | 0.0037445 | 0.0175022 | -2.64 |
| ILMN_1693108 | RUVBL1   | 0.13  | 7.24  | 2.97  | 0.0037452 | 0.0175029 | -2.64 |
| ILMN_1712320 | DDX50    | 0.12  | 7.56  | 2.97  | 0.0037495 | 0.0175209 | -2.64 |
| ILMN_2402947 | USP14    | 0.10  | 7.19  | 2.97  | 0.0037502 | 0.0175217 | -2.64 |
| ILMN_1771385 | GBP4     | 0.26  | 7.57  | 2.97  | 0.0037521 | 0.017528  | -2.64 |
| ILMN_1719097 | C18orf8  | 0.12  | 8.61  | 2.97  | 0.0037545 | 0.0175358 | -2.64 |
| ILMN_1798952 | KDEL3    | 0.14  | 6.73  | 2.97  | 0.0037548 | 0.0175358 | -2.63 |
| ILMN_1655206 | ZBTB34   | -0.09 | 7.36  | -2.97 | 0.0037613 | 0.0175639 | -2.64 |
| ILMN_1711853 | MED24    | -0.12 | 7.72  | -2.97 | 0.0037705 | 0.0176021 | -2.64 |
| ILMN_1806463 | CTAGE6   | -0.18 | 6.98  | -2.97 | 0.0037701 | 0.0176021 | -2.64 |
| ILMN_2360705 | ACSL3    | -0.16 | 9.17  | -2.97 | 0.0037713 | 0.0176033 | -2.64 |
| ILMN_1774387 | ZHX3     | 0.11  | 7.27  | 2.97  | 0.0037759 | 0.0176203 | -2.64 |
| ILMN_1808059 | BCAS4    | 0.20  | 6.99  | 2.97  | 0.0037759 | 0.0176203 | -2.64 |
| ILMN_1694027 | SES3     | 0.11  | 6.61  | 2.97  | 0.0037793 | 0.0176336 | -2.64 |
| ILMN_2342250 | ZXDA     | 0.06  | 6.37  | 2.97  | 0.0037856 | 0.0176608 | -2.65 |

|              |           |       |       |       |           |           |       |
|--------------|-----------|-------|-------|-------|-----------|-----------|-------|
| ILMN_1660498 | RPS27     | 0.14  | 13.71 | 2.97  | 0.0037883 | 0.0176707 | -2.65 |
| ILMN_1741180 | HEXDC     | -0.14 | 7.16  | -2.97 | 0.0037975 | 0.0177088 | -2.65 |
| ILMN_2180582 | PNPLA8    | 0.13  | 6.86  | 2.97  | 0.0037972 | 0.0177088 | -2.65 |
| ILMN_2241124 | ADGRF1    | -0.10 | 6.48  | -2.97 | 0.0038006 | 0.0177211 | -2.65 |
| ILMN_1772329 | LRRFIP2   | -0.14 | 8.13  | -2.96 | 0.0038136 | 0.017777  | -2.65 |
| ILMN_3306482 | GCSH      | 0.13  | 7.87  | 2.96  | 0.0038136 | 0.017777  | -2.65 |
| ILMN_1663416 | NA        | 0.14  | 12.98 | 2.96  | 0.0038197 | 0.0178018 | -2.65 |
| ILMN_1664826 | FBXO33    | 0.13  | 8.37  | 2.96  | 0.00382   | 0.0178018 | -2.65 |
| ILMN_3195253 | RPL7      | 0.19  | 9.25  | 2.96  | 0.0038237 | 0.017815  | -2.66 |
| ILMN_3235148 | RPL23AP87 | 0.30  | 10.00 | 2.96  | 0.0038239 | 0.017815  | -2.66 |
| ILMN_1687279 | DHPS      | -0.15 | 7.74  | -2.96 | 0.0038369 | 0.0178735 | -2.66 |
| ILMN_1704665 | GPM6B     | 0.18  | 7.72  | 2.96  | 0.0038527 | 0.0179448 | -2.66 |
| ILMN_1792110 | C10orf76  | -0.13 | 7.92  | -2.96 | 0.0038546 | 0.0179511 | -2.66 |
| ILMN_2367063 | TPK1      | 0.11  | 6.71  | 2.96  | 0.0038573 | 0.017961  | -2.66 |
| ILMN_1688178 | RRP7A     | 0.20  | 7.98  | 2.96  | 0.0038583 | 0.0179633 | -2.66 |
| ILMN_1654737 | TRIM32    | 0.10  | 7.02  | 2.96  | 0.0038603 | 0.0179676 | -2.66 |
| ILMN_1655722 | BCL2L15   | -0.19 | 8.01  | -2.96 | 0.00386   | 0.0179676 | -2.66 |
| ILMN_3249742 | PXMP4     | -0.08 | 6.58  | -2.96 | 0.0038632 | 0.0179789 | -2.67 |
| ILMN_1804306 | LYPLA2    | -0.11 | 6.84  | -2.96 | 0.0038759 | 0.0180356 | -2.67 |
| ILMN_1736234 | CHTOP     | -0.11 | 8.90  | -2.96 | 0.003878  | 0.0180397 | -2.67 |
| ILMN_1770361 | NA        | 0.08  | 6.43  | 2.96  | 0.0038784 | 0.0180397 | -2.67 |
| ILMN_1793672 | SIX5      | -0.11 | 7.36  | -2.96 | 0.0038781 | 0.0180397 | -2.67 |
| ILMN_1712959 | DUSP2     | 0.12  | 6.71  | 2.96  | 0.0038906 | 0.0180919 | -2.67 |
| ILMN_1762316 | CPSF3L    | -0.10 | 7.36  | -2.96 | 0.0038904 | 0.0180919 | -2.67 |
| ILMN_1701269 | ATP5C1    | -0.16 | 9.74  | -2.96 | 0.0038933 | 0.018102  | -2.67 |
| ILMN_1713143 | MRPL3     | 0.14  | 10.23 | 2.96  | 0.0038955 | 0.0181096 | -2.67 |
| ILMN_1753353 | SLBP      | 0.16  | 7.67  | 2.96  | 0.0038968 | 0.0181135 | -2.67 |
| ILMN_1716480 | ACD       | 0.11  | 7.02  | 2.96  | 0.0038978 | 0.0181154 | -2.67 |
| ILMN_1658015 | MBNL2     | 0.19  | 7.87  | 2.96  | 0.0039015 | 0.0181301 | -2.67 |
| ILMN_2380566 | SIAH1     | -0.12 | 8.09  | -2.96 | 0.0039031 | 0.0181351 | -2.67 |
| ILMN_2412172 | APOBEC3F  | 0.15  | 7.19  | 2.96  | 0.0039228 | 0.0182245 | -2.67 |
| ILMN_1754553 | MED19     | -0.14 | 8.00  | -2.95 | 0.0039237 | 0.0182262 | -2.68 |
| ILMN_3245893 | SNORA1    | 0.08  | 6.53  | 2.95  | 0.0039268 | 0.018238  | -2.68 |
| ILMN_1740633 | PRF1      | 0.12  | 6.68  | 2.95  | 0.0039318 | 0.0182586 | -2.68 |
| ILMN_3237062 | FAM47E    | -0.10 | 6.63  | -2.95 | 0.003933  | 0.0182619 | -2.68 |
| ILMN_2310896 | NLRP3     | 0.19  | 6.78  | 2.95  | 0.0039343 | 0.0182653 | -2.68 |
| ILMN_1760441 | MRPS5     | -0.16 | 8.32  | -2.95 | 0.0039408 | 0.0182932 | -2.68 |
| ILMN_1690352 | ADO       | 0.13  | 8.18  | 2.95  | 0.003942  | 0.0182965 | -2.68 |
| ILMN_1658917 | SLC1A1    | -0.23 | 7.41  | -2.95 | 0.0039429 | 0.0182978 | -2.68 |
| ILMN_1724941 | CDCP1     | -0.16 | 8.09  | -2.95 | 0.0039442 | 0.0183016 | -2.68 |
| ILMN_2234970 | SLC39A3   | -0.11 | 8.06  | -2.95 | 0.0039456 | 0.0183054 | -2.68 |
| ILMN_1699728 | BTD       | -0.12 | 6.80  | -2.95 | 0.0039492 | 0.0183198 | -2.69 |
| ILMN_3263501 | NA        | -0.10 | 6.52  | -2.95 | 0.0039511 | 0.0183261 | -2.69 |
| ILMN_1732060 | ARHGAP1   | 0.12  | 9.05  | 2.95  | 0.0039539 | 0.0183367 | -2.69 |
| ILMN_2361603 | NDRG2     | -0.28 | 8.51  | -2.95 | 0.0039617 | 0.0183679 | -2.69 |
| ILMN_3235584 | TRIM66    | -0.13 | 7.89  | -2.95 | 0.0039615 | 0.0183679 | -2.69 |
| ILMN_1712719 | MAP7      | -0.20 | 9.36  | -2.95 | 0.0039645 | 0.0183784 | -2.69 |
| ILMN_1695276 | MAPRE2    | -0.16 | 8.80  | -2.95 | 0.0039655 | 0.0183807 | -2.68 |

|              |          |       |       |       |           |           |       |
|--------------|----------|-------|-------|-------|-----------|-----------|-------|
| ILMN_1806030 | PPL      | 0.12  | 6.88  | 2.95  | 0.0039715 | 0.0184058 | -2.69 |
| ILMN_2346451 | ACTR3B   | -0.08 | 6.43  | -2.95 | 0.003973  | 0.0184103 | -2.69 |
| ILMN_2357770 | TCEA1    | 0.19  | 8.17  | 2.95  | 0.0039768 | 0.0184254 | -2.69 |
| ILMN_1804597 | DCAF17   | 0.09  | 6.66  | 2.95  | 0.0039815 | 0.0184448 | -2.69 |
| ILMN_1684959 | ASTN1    | 0.07  | 6.32  | 2.95  | 0.003991  | 0.0184861 | -2.69 |
| ILMN_2142695 | RNF4     | 0.11  | 7.40  | 2.95  | 0.0039963 | 0.0185086 | -2.70 |
| ILMN_1739914 | ZNF618   | 0.07  | 6.42  | 2.95  | 0.0040037 | 0.01854   | -2.70 |
| ILMN_1811373 | FAM20B   | 0.12  | 8.82  | 2.95  | 0.0040067 | 0.0185514 | -2.69 |
| ILMN_1806275 | ADAT3    | -0.10 | 6.93  | -2.95 | 0.0040211 | 0.0186133 | -2.70 |
| ILMN_3281599 | RPL3     | 0.12  | 12.39 | 2.95  | 0.0040206 | 0.0186133 | -2.70 |
| ILMN_1655229 | SLC7A11  | 0.12  | 6.40  | 2.95  | 0.0040294 | 0.0186493 | -2.70 |
| ILMN_1656033 | NA       | -0.09 | 6.44  | -2.95 | 0.0040319 | 0.0186583 | -2.70 |
| ILMN_1740217 | HACE1    | 0.09  | 6.68  | 2.94  | 0.0040415 | 0.0187001 | -2.71 |
| ILMN_1759614 | TMEM231  | -0.10 | 6.64  | -2.94 | 0.0040424 | 0.018702  | -2.71 |
| ILMN_1676899 | YEATS2   | 0.09  | 7.72  | 2.94  | 0.0040438 | 0.0187034 | -2.71 |
| ILMN_1789244 | SOX8     | -0.28 | 7.30  | -2.94 | 0.0040434 | 0.0187034 | -2.71 |
| ILMN_1783728 | TBRG4    | -0.15 | 8.26  | -2.94 | 0.0040588 | 0.01877   | -2.71 |
| ILMN_2135175 | SNORD36A | 0.10  | 6.94  | 2.94  | 0.0040615 | 0.0187803 | -2.71 |
| ILMN_1751898 | C12orf4  | -0.12 | 7.36  | -2.94 | 0.0040641 | 0.0187895 | -2.71 |
| ILMN_2367710 | PKN1     | 0.12  | 6.95  | 2.94  | 0.0040688 | 0.0188088 | -2.71 |
| ILMN_3250032 | XPR1     | 0.10  | 6.91  | 2.94  | 0.004074  | 0.0188302 | -2.71 |
| ILMN_1707631 | MED10    | 0.13  | 8.31  | 2.94  | 0.0040863 | 0.0188821 | -2.72 |
| ILMN_2298818 | RPS29    | 0.20  | 7.96  | 2.94  | 0.0040861 | 0.0188821 | -2.72 |
| ILMN_1664350 | GBA3     | -0.27 | 6.96  | -2.94 | 0.0040929 | 0.0189098 | -2.72 |
| ILMN_1751330 | RBCK1    | -0.15 | 8.53  | -2.94 | 0.0040934 | 0.0189098 | -2.72 |
| ILMN_2295747 | NA       | -0.08 | 6.40  | -2.94 | 0.0041058 | 0.0189647 | -2.72 |
| ILMN_1677098 | YPEL2    | -0.16 | 7.83  | -2.94 | 0.0041066 | 0.0189658 | -2.72 |
| ILMN_1672811 | C1orf159 | -0.09 | 6.70  | -2.94 | 0.0041082 | 0.0189708 | -2.72 |
| ILMN_2118129 | ITLN2    | 0.84  | 7.47  | 2.94  | 0.0041115 | 0.0189831 | -2.72 |
| ILMN_1729319 | USP7     | -0.10 | 7.99  | -2.94 | 0.004113  | 0.0189878 | -2.72 |
| ILMN_1769606 | PIWIL4   | -0.14 | 7.21  | -2.94 | 0.0041158 | 0.0189982 | -2.72 |
| ILMN_1691846 | GOS2     | 0.17  | 6.58  | 2.94  | 0.0041186 | 0.0190085 | -2.72 |
| ILMN_1815292 | RPL7     | 0.20  | 9.50  | 2.94  | 0.0041291 | 0.0190545 | -2.73 |
| ILMN_1704380 | INCA1    | -0.10 | 6.63  | -2.94 | 0.0041331 | 0.0190694 | -2.73 |
| ILMN_2264625 | NIPBL    | -0.10 | 8.18  | -2.94 | 0.0041335 | 0.0190694 | -2.73 |
| ILMN_1784428 | MGC57346 | -0.10 | 7.11  | -2.94 | 0.0041342 | 0.0190702 | -2.73 |
| ILMN_1653613 | PIGO     | -0.11 | 7.09  | -2.94 | 0.0041464 | 0.0191216 | -2.73 |
| ILMN_1722532 | KDM3A    | -0.15 | 7.58  | -2.94 | 0.0041465 | 0.0191216 | -2.73 |
| ILMN_3235185 | SNRNP200 | -0.11 | 7.23  | -2.94 | 0.0041501 | 0.0191358 | -2.73 |
| ILMN_2196569 | NUP93    | 0.12  | 7.91  | 2.93  | 0.0041565 | 0.0191628 | -2.73 |
| ILMN_1761138 | C9orf142 | -0.16 | 8.70  | -2.93 | 0.0041616 | 0.0191839 | -2.73 |
| ILMN_2071429 | TTC39B   | -0.09 | 6.39  | -2.93 | 0.0041649 | 0.0191962 | -2.73 |
| ILMN_1771957 | MAN1B1   | -0.13 | 8.42  | -2.93 | 0.0041685 | 0.0192103 | -2.73 |
| ILMN_1711414 | MRPS27   | 0.12  | 8.24  | 2.93  | 0.004171  | 0.0192195 | -2.73 |
| ILMN_1799198 | OTUB2    | 0.10  | 6.60  | 2.93  | 0.0041731 | 0.0192239 | -2.74 |
| ILMN_1891920 | MYO1H    | 0.10  | 6.45  | 2.94  | 0.0041729 | 0.0192239 | -2.72 |
| ILMN_2362245 | NA       | 0.12  | 8.07  | 2.93  | 0.0041754 | 0.019232  | -2.74 |
| ILMN_1739583 | ROCK1    | 0.09  | 6.73  | 2.93  | 0.0041781 | 0.0192418 | -2.74 |

|              |           |       |       |       |           |           |       |
|--------------|-----------|-------|-------|-------|-----------|-----------|-------|
| ILMN_1679929 | KLF13     | -0.14 | 9.42  | -2.93 | 0.004179  | 0.0192435 | -2.74 |
| ILMN_1792587 | VPS4B     | -0.14 | 10.05 | -2.93 | 0.004186  | 0.0192729 | -2.74 |
| ILMN_1749516 | TMEM225   | -0.08 | 6.40  | -2.93 | 0.0041881 | 0.0192801 | -2.73 |
| ILMN_2379931 | PIGO      | -0.13 | 7.46  | -2.93 | 0.0041924 | 0.0192974 | -2.74 |
| ILMN_1784577 | ZNF12     | -0.09 | 7.43  | -2.93 | 0.0041939 | 0.019301  | -2.74 |
| ILMN_1805158 | TAF1A     | 0.08  | 6.59  | 2.93  | 0.0041943 | 0.019301  | -2.74 |
| ILMN_1812461 | WISP2     | 0.09  | 6.51  | 2.93  | 0.0042035 | 0.0193409 | -2.74 |
| ILMN_1793522 | PRKAB1    | -0.17 | 8.17  | -2.93 | 0.0042138 | 0.0193854 | -2.74 |
| ILMN_2384496 | ST6GAL1   | 0.12  | 6.74  | 2.93  | 0.0042269 | 0.0194433 | -2.75 |
| ILMN_1795704 | KIAA0232  | -0.12 | 7.09  | -2.93 | 0.0042314 | 0.0194614 | -2.74 |
| ILMN_1697830 | MS4A1     | -0.08 | 6.42  | -2.93 | 0.0042387 | 0.0194923 | -2.75 |
| ILMN_1703079 | NFS1      | -0.08 | 6.44  | -2.93 | 0.0042413 | 0.0195015 | -2.75 |
| ILMN_1696622 | SLC38A6   | 0.12  | 7.10  | 2.93  | 0.0042435 | 0.0195092 | -2.75 |
| ILMN_2319000 | MATK      | -0.13 | 7.02  | -2.93 | 0.0042484 | 0.0195292 | -2.75 |
| ILMN_1839193 | NA        | -0.08 | 6.68  | -2.93 | 0.0042578 | 0.0195695 | -2.75 |
| ILMN_1776723 | PHF11     | 0.15  | 9.57  | 2.93  | 0.0042694 | 0.0196204 | -2.76 |
| ILMN_1721116 | USP10     | 0.12  | 7.75  | 2.93  | 0.0042715 | 0.0196273 | -2.75 |
| ILMN_1652790 | CLK1      | 0.12  | 7.07  | 2.93  | 0.0042741 | 0.0196368 | -2.76 |
| ILMN_2342066 | METRNL    | -0.13 | 7.00  | -2.92 | 0.0042826 | 0.0196733 | -2.76 |
| ILMN_3244323 | LOC148413 | -0.12 | 8.30  | -2.92 | 0.0043019 | 0.0197592 | -2.76 |
| ILMN_1810107 | C17orf74  | -0.10 | 6.58  | -2.92 | 0.0043035 | 0.0197639 | -2.76 |
| ILMN_1765520 | MTIF2     | -0.20 | 8.89  | -2.92 | 0.0043089 | 0.0197859 | -2.76 |
| ILMN_1789342 | NDUFS2    | -0.09 | 6.86  | -2.92 | 0.0043154 | 0.0198134 | -2.77 |
| ILMN_1809010 | PSMC3     | 0.13  | 8.83  | 2.92  | 0.0043244 | 0.0198517 | -2.77 |
| ILMN_1798827 | SRBD1     | 0.14  | 7.96  | 2.92  | 0.0043252 | 0.0198531 | -2.77 |
| ILMN_1898311 | NA        | -0.07 | 6.65  | -2.92 | 0.0043271 | 0.0198592 | -2.77 |
| ILMN_1862365 | NA        | -0.11 | 6.61  | -2.92 | 0.0043308 | 0.0198735 | -2.77 |
| ILMN_1686553 | INTS2     | 0.09  | 7.16  | 2.92  | 0.0043344 | 0.0198872 | -2.76 |
| ILMN_1746561 | BCL2L2    | -0.15 | 9.10  | -2.92 | 0.0043456 | 0.0199337 | -2.77 |
| ILMN_1804448 | MSI2      | 0.10  | 6.67  | 2.92  | 0.0043457 | 0.0199337 | -2.77 |
| ILMN_1815479 | NOP10     | 0.11  | 10.74 | 2.92  | 0.0043501 | 0.0199486 | -2.77 |
| ILMN_2049536 | TRPV2     | 0.12  | 6.84  | 2.92  | 0.0043495 | 0.0199486 | -2.77 |
| ILMN_1660654 | CDCA2     | 0.10  | 6.55  | 2.92  | 0.0043605 | 0.0199935 | -2.77 |
| ILMN_1723729 | RSL1D1    | 0.15  | 8.52  | 2.92  | 0.0043629 | 0.0200021 | -2.78 |
| ILMN_1803624 | TMEM147   | 0.14  | 9.14  | 2.92  | 0.0043666 | 0.0200161 | -2.78 |
| ILMN_1727558 | NA        | -0.10 | 6.79  | -2.92 | 0.0043729 | 0.0200426 | -2.78 |
| ILMN_1728298 | SBK1      | -0.09 | 6.62  | -2.92 | 0.004376  | 0.020054  | -2.78 |
| ILMN_1705201 | FOXC2     | 0.07  | 6.50  | 2.92  | 0.0043816 | 0.0200773 | -2.78 |
| ILMN_1754753 | IL6R      | -0.09 | 6.67  | -2.92 | 0.0044008 | 0.0201626 | -2.78 |
| ILMN_1698406 | ORMDL1    | 0.10  | 9.49  | 2.91  | 0.0044291 | 0.0202895 | -2.78 |
| ILMN_1911605 | FRS2      | -0.12 | 7.79  | -2.91 | 0.0044302 | 0.0202915 | -2.79 |
| ILMN_3307483 | MCF2L     | -0.16 | 7.43  | -2.91 | 0.0044312 | 0.0202935 | -2.79 |
| ILMN_1678833 | CCR1      | 0.14  | 6.72  | 2.91  | 0.0044322 | 0.0202956 | -2.79 |
| ILMN_1809323 | TMEM246   | -0.13 | 7.13  | -2.91 | 0.0044345 | 0.0203034 | -2.78 |
| ILMN_1679460 | PPFIBP1   | 0.14  | 7.18  | 2.91  | 0.0044359 | 0.0203072 | -2.79 |
| ILMN_1670570 | MXI1      | -0.08 | 6.52  | -2.91 | 0.004441  | 0.0203279 | -2.79 |
| ILMN_1756878 | SLC39A9   | -0.11 | 7.07  | -2.91 | 0.0044475 | 0.0203546 | -2.79 |
| ILMN_1832155 | DCUN1D5   | 0.10  | 6.71  | 2.91  | 0.0044492 | 0.0203599 | -2.79 |

|              |           |       |       |       |           |           |       |
|--------------|-----------|-------|-------|-------|-----------|-----------|-------|
| ILMN_1801866 | BRWD1     | -0.15 | 7.18  | -2.91 | 0.0044507 | 0.020364  | -2.79 |
| ILMN_2326273 | CHI3L2    | 0.17  | 6.54  | 2.91  | 0.0044611 | 0.0204089 | -2.80 |
| ILMN_1716195 | HIST1H2BG | -0.15 | 6.63  | -2.91 | 0.004469  | 0.0204423 | -2.80 |
| ILMN_1674128 | CWC22     | 0.11  | 6.59  | 2.91  | 0.0044708 | 0.0204478 | -2.80 |
| ILMN_1801616 | EMP1      | 0.41  | 11.13 | 2.91  | 0.0044773 | 0.0204749 | -2.80 |
| ILMN_1762095 | TMTC4     | -0.12 | 7.49  | -2.91 | 0.0044877 | 0.0205194 | -2.80 |
| ILMN_1829064 | NA        | 0.09  | 6.47  | 2.91  | 0.0044882 | 0.0205194 | -2.80 |
| ILMN_3297126 | TYMP      | 0.11  | 6.70  | 2.91  | 0.0044994 | 0.0205677 | -2.80 |
| ILMN_3250909 | NA        | -0.07 | 6.59  | -2.91 | 0.0045017 | 0.0205757 | -2.80 |
| ILMN_2357855 | NTRK2     | -0.15 | 6.58  | -2.91 | 0.0045132 | 0.0206251 | -2.80 |
| ILMN_1651365 | ZBED2     | 0.10  | 6.33  | 2.91  | 0.0045144 | 0.0206278 | -2.81 |
| ILMN_1725246 | COG8      | -0.08 | 6.64  | -2.91 | 0.0045158 | 0.0206319 | -2.81 |
| ILMN_2392370 | MYH14     | -0.14 | 7.05  | -2.91 | 0.0045168 | 0.0206335 | -2.81 |
| ILMN_1722292 | AVL9      | 0.08  | 6.75  | 2.91  | 0.0045246 | 0.0206666 | -2.81 |
| ILMN_1763887 | SFI1      | -0.09 | 6.60  | -2.91 | 0.0045258 | 0.0206691 | -2.81 |
| ILMN_1801610 | METRNL    | -0.15 | 7.38  | -2.91 | 0.004527  | 0.02067   | -2.81 |
| ILMN_2077550 | RACGAP1   | 0.15  | 7.35  | 2.91  | 0.0045272 | 0.02067   | -2.81 |
| ILMN_2064132 | NANP      | 0.10  | 6.37  | 2.91  | 0.0045284 | 0.0206702 | -2.81 |
| ILMN_3192411 | OLMALINC  | -0.07 | 6.54  | -2.91 | 0.0045279 | 0.0206702 | -2.81 |
| ILMN_1660085 | PRTG      | -0.09 | 6.44  | -2.91 | 0.0045311 | 0.0206797 | -2.80 |
| ILMN_2405297 | NOTCH2    | 0.10  | 6.90  | 2.91  | 0.0045364 | 0.020701  | -2.81 |
| ILMN_1668619 | FAM234B   | 0.08  | 6.48  | 2.91  | 0.0045374 | 0.020703  | -2.81 |
| ILMN_2343036 | ZMYM5     | 0.08  | 6.52  | 2.90  | 0.0045427 | 0.0207243 | -2.81 |
| ILMN_1777024 | PCDHAC2   | -0.09 | 6.58  | -2.90 | 0.0045455 | 0.0207345 | -2.81 |
| ILMN_1697597 | EFCAB14   | -0.14 | 9.75  | -2.90 | 0.0045494 | 0.0207495 | -2.81 |
| ILMN_1715589 | PLEKHA2   | -0.08 | 6.37  | -2.90 | 0.0045504 | 0.0207514 | -2.81 |
| ILMN_1652412 | PHKB      | -0.10 | 7.08  | -2.90 | 0.0045576 | 0.0207801 | -2.82 |
| ILMN_1701216 | BANP      | -0.12 | 7.54  | -2.90 | 0.0045581 | 0.0207801 | -2.82 |
| ILMN_1863592 | NA        | -0.09 | 6.98  | -2.90 | 0.0045585 | 0.0207801 | -2.82 |
| ILMN_1722489 | TFF1      | 0.63  | 10.00 | 2.90  | 0.0045688 | 0.0208212 | -2.82 |
| ILMN_1810942 | CYP3A5    | -0.31 | 10.23 | -2.90 | 0.0045687 | 0.0208212 | -2.81 |
| ILMN_1783805 | PNMA3     | 0.12  | 6.70  | 2.90  | 0.0045748 | 0.0208458 | -2.82 |
| ILMN_1772156 | ERP44     | -0.10 | 6.76  | -2.90 | 0.0045808 | 0.0208706 | -2.82 |
| ILMN_1688231 | TREM1     | 0.08  | 6.35  | 2.90  | 0.0045827 | 0.0208766 | -2.82 |
| ILMN_1773964 | H1FX      | 0.14  | 7.46  | 2.90  | 0.004589  | 0.0209026 | -2.82 |
| ILMN_1758039 | KRTAP13-2 | -0.33 | 6.80  | -2.90 | 0.0045931 | 0.0209185 | -2.82 |
| ILMN_1782977 | UBA52     | 0.09  | 13.06 | 2.90  | 0.004594  | 0.0209199 | -2.82 |
| ILMN_1707336 | ARPC4     | -0.14 | 9.50  | -2.90 | 0.0045956 | 0.0209243 | -2.82 |
| ILMN_1712023 | SLC8A3    | 0.08  | 6.37  | 2.90  | 0.0046    | 0.0209414 | -2.82 |
| ILMN_1654602 | SDHAP1    | -0.08 | 6.55  | -2.90 | 0.0046039 | 0.0209564 | -2.82 |
| ILMN_1670841 | CPNE1     | 0.17  | 7.98  | 2.90  | 0.0046073 | 0.0209693 | -2.83 |
| ILMN_2214790 | LAMB1     | 0.17  | 7.87  | 2.90  | 0.0046101 | 0.0209789 | -2.83 |
| ILMN_2151488 | RMI1      | -0.13 | 7.89  | -2.90 | 0.0046141 | 0.0209931 | -2.83 |
| ILMN_2361163 | SSBP3     | -0.11 | 7.02  | -2.90 | 0.0046144 | 0.0209931 | -2.83 |
| ILMN_1652857 | SLC15A1   | -0.19 | 6.62  | -2.90 | 0.0046185 | 0.0210089 | -2.83 |
| ILMN_1766085 | REL       | 0.11  | 6.80  | 2.90  | 0.0046298 | 0.0210577 | -2.83 |
| ILMN_2360784 | RRBP1     | -0.14 | 11.08 | -2.90 | 0.0046343 | 0.0210753 | -2.83 |
| ILMN_1665483 | PUM3      | 0.14  | 8.45  | 2.90  | 0.0046351 | 0.0210763 | -2.83 |

|              |          |       |       |       |           |           |       |
|--------------|----------|-------|-------|-------|-----------|-----------|-------|
| ILMN_1659297 | FZD6     | 0.11  | 7.04  | 2.90  | 0.004643  | 0.0211096 | -2.83 |
| ILMN_2373556 | SPAST    | 0.14  | 6.97  | 2.90  | 0.004647  | 0.0211247 | -2.83 |
| ILMN_1694400 | MSR1     | 0.10  | 6.57  | 2.90  | 0.0046484 | 0.0211284 | -2.83 |
| ILMN_1724734 | UQCC1    | -0.08 | 6.60  | -2.90 | 0.0046502 | 0.0211339 | -2.83 |
| ILMN_1769191 | GNAS     | 0.10  | 11.62 | 2.90  | 0.0046544 | 0.02115   | -2.83 |
| ILMN_1671048 | ZNF644   | -0.10 | 7.20  | -2.90 | 0.0046562 | 0.0211525 | -2.83 |
| ILMN_1677262 | NA       | 0.18  | 10.87 | 2.90  | 0.0046561 | 0.0211525 | -2.83 |
| ILMN_1751264 | CCDC126  | 0.10  | 6.82  | 2.90  | 0.0046604 | 0.0211689 | -2.84 |
| ILMN_2352303 | RASSF2   | 0.20  | 7.28  | 2.90  | 0.0046657 | 0.02119   | -2.84 |
| ILMN_1683700 | TNFSF12  | 0.14  | 7.34  | 2.90  | 0.0046678 | 0.021194  | -2.84 |
| ILMN_1743829 | ATXN2    | -0.10 | 9.47  | -2.90 | 0.0046677 | 0.021194  | -2.84 |
| ILMN_2149494 | NPL      | 0.20  | 7.34  | 2.90  | 0.0046712 | 0.021207  | -2.84 |
| ILMN_1773148 | MSANTD2  | -0.11 | 7.20  | -2.90 | 0.0046724 | 0.0212093 | -2.84 |
| ILMN_1671509 | CCL3     | 0.23  | 6.72  | 2.89  | 0.0046756 | 0.0212185 | -2.84 |
| ILMN_1724139 | TMEM123  | 0.17  | 10.27 | 2.89  | 0.0046751 | 0.0212185 | -2.84 |
| ILMN_1783023 | C5orf51  | 0.14  | 8.64  | 2.89  | 0.0046768 | 0.0212208 | -2.84 |
| ILMN_1773200 | CCP110   | 0.13  | 8.00  | 2.89  | 0.0046826 | 0.0212446 | -2.84 |
| ILMN_1686929 | GPATCH3  | -0.09 | 6.88  | -2.89 | 0.0046886 | 0.0212677 | -2.84 |
| ILMN_3209399 | KRT18    | -0.18 | 7.46  | -2.89 | 0.0046889 | 0.0212677 | -2.84 |
| ILMN_1806320 | PPFIBP1  | 0.10  | 6.91  | 2.89  | 0.0046961 | 0.0212976 | -2.84 |
| ILMN_1813763 | SLC20A2  | -0.25 | 8.06  | -2.89 | 0.0047041 | 0.0213309 | -2.84 |
| ILMN_1659752 | AIDA     | 0.12  | 6.91  | 2.89  | 0.0047049 | 0.0213317 | -2.84 |
| ILMN_1681103 | AQP1     | 0.10  | 6.83  | 2.89  | 0.0047112 | 0.0213571 | -2.85 |
| ILMN_3197767 | NA       | 0.17  | 8.41  | 2.89  | 0.0047118 | 0.0213571 | -2.85 |
| ILMN_1684293 | ANP32B   | 0.09  | 11.55 | 2.89  | 0.0047178 | 0.0213818 | -2.85 |
| ILMN_1659929 | HNF1A    | -0.08 | 6.49  | -2.89 | 0.0047203 | 0.0213902 | -2.85 |
| ILMN_1674343 | NXF3     | 0.17  | 6.85  | 2.89  | 0.0047228 | 0.0213989 | -2.85 |
| ILMN_2312275 | SRP54    | 0.10  | 9.31  | 2.89  | 0.0047242 | 0.0214023 | -2.85 |
| ILMN_1794726 | RNF167   | -0.16 | 8.04  | -2.89 | 0.0047252 | 0.021404  | -2.84 |
| ILMN_1664367 | COQ6     | -0.08 | 6.62  | -2.89 | 0.0047305 | 0.0214251 | -2.84 |
| ILMN_2044293 | KBTBD7   | -0.10 | 7.12  | -2.89 | 0.0047478 | 0.021501  | -2.85 |
| ILMN_1770206 | GEMIN4   | 0.13  | 8.35  | 2.89  | 0.0047493 | 0.0215031 | -2.85 |
| ILMN_1789384 | QSOX2    | 0.14  | 7.33  | 2.89  | 0.0047496 | 0.0215031 | -2.85 |
| ILMN_1729019 | 7-Sep    | 0.12  | 6.96  | 2.89  | 0.004754  | 0.0215202 | -2.85 |
| ILMN_1690689 | NA       | -0.09 | 6.53  | -2.89 | 0.004764  | 0.0215626 | -2.85 |
| ILMN_1783707 | SPECC1   | 0.09  | 6.58  | 2.89  | 0.0047654 | 0.0215662 | -2.86 |
| ILMN_1689400 | CLK1     | 0.20  | 8.37  | 2.89  | 0.0047691 | 0.02158   | -2.85 |
| ILMN_1659343 | NA       | -0.14 | 10.57 | -2.89 | 0.0047714 | 0.0215877 | -2.86 |
| ILMN_1766359 | GATAD2B  | 0.11  | 7.40  | 2.89  | 0.0047754 | 0.0216032 | -2.86 |
| ILMN_3238676 | ULBP2    | 0.07  | 6.38  | 2.89  | 0.0047764 | 0.0216049 | -2.86 |
| ILMN_2357976 | NA       | -0.10 | 6.50  | -2.89 | 0.0047782 | 0.0216098 | -2.86 |
| ILMN_1786972 | SARS     | 0.11  | 7.90  | 2.89  | 0.0047795 | 0.0216129 | -2.86 |
| ILMN_1754990 | RPS27A   | 0.11  | 13.68 | 2.89  | 0.0047833 | 0.0216273 | -2.86 |
| ILMN_1748018 | GORASP2  | 0.14  | 8.94  | 2.89  | 0.0047863 | 0.0216381 | -2.86 |
| ILMN_3308906 | MIR192   | -0.12 | 6.47  | -2.89 | 0.0047897 | 0.0216505 | -2.86 |
| ILMN_1665123 | NMNAT3   | -0.10 | 6.68  | -2.89 | 0.0047915 | 0.0216558 | -2.86 |
| ILMN_3281563 | NA       | 0.17  | 11.04 | 2.89  | 0.0047932 | 0.0216608 | -2.86 |
| ILMN_1742705 | SLC39A11 | -0.16 | 8.34  | -2.89 | 0.004796  | 0.0216708 | -2.86 |

|              |          |       |       |       |           |           |       |
|--------------|----------|-------|-------|-------|-----------|-----------|-------|
| ILMN_1807359 | CLEC11A  | 0.13  | 7.00  | 2.89  | 0.0048008 | 0.0216897 | -2.86 |
| ILMN_1710150 | EED      | 0.09  | 6.75  | 2.89  | 0.004808  | 0.0217194 | -2.86 |
| ILMN_1843081 | CCDC160  | 0.08  | 6.39  | 2.89  | 0.0048114 | 0.0217317 | -2.86 |
| ILMN_1686152 | GGA2     | 0.19  | 7.92  | 2.88  | 0.0048207 | 0.0217706 | -2.87 |
| ILMN_2191568 | NPRL2    | -0.11 | 8.39  | -2.88 | 0.0048273 | 0.0217976 | -2.87 |
| ILMN_1812638 | ATP5L    | -0.11 | 11.57 | -2.88 | 0.0048361 | 0.0218346 | -2.87 |
| ILMN_1759359 | BTF3L4   | 0.16  | 7.66  | 2.88  | 0.0048398 | 0.0218406 | -2.87 |
| ILMN_2343278 | PLPP1    | -0.16 | 9.15  | -2.88 | 0.0048384 | 0.0218406 | -2.87 |
| ILMN_2353161 | MSLN     | 0.47  | 7.94  | 2.88  | 0.00484   | 0.0218406 | -2.87 |
| ILMN_3231881 | PTMA     | 0.21  | 7.95  | 2.88  | 0.0048397 | 0.0218406 | -2.87 |
| ILMN_1806782 | ZNF235   | -0.09 | 6.85  | -2.88 | 0.0048447 | 0.0218593 | -2.87 |
| ILMN_3249406 | URB2     | 0.14  | 7.31  | 2.88  | 0.004848  | 0.0218712 | -2.87 |
| ILMN_1703053 | NA       | -0.12 | 7.05  | -2.88 | 0.0048565 | 0.0219068 | -2.87 |
| ILMN_2311278 | ADD3     | -0.21 | 8.09  | -2.88 | 0.0048596 | 0.0219177 | -2.87 |
| ILMN_1670918 | INSR     | -0.09 | 6.54  | -2.88 | 0.0048605 | 0.0219191 | -2.87 |
| ILMN_1672662 | SLC20A1  | 0.27  | 9.92  | 2.88  | 0.0048612 | 0.0219192 | -2.87 |
| ILMN_1741585 | SFMBT1   | 0.10  | 6.93  | 2.88  | 0.0048639 | 0.0219284 | -2.87 |
| ILMN_2334765 | ARMCX3   | 0.12  | 7.28  | 2.88  | 0.0048704 | 0.0219552 | -2.88 |
| ILMN_2396996 | PPCS     | -0.14 | 8.99  | -2.88 | 0.0048746 | 0.021971  | -2.88 |
| ILMN_1663493 | NA       | 0.11  | 6.90  | 2.88  | 0.0048772 | 0.02198   | -2.88 |
| ILMN_1692133 | ZNF226   | 0.07  | 6.54  | 2.88  | 0.0048797 | 0.0219881 | -2.88 |
| ILMN_1730710 | ADORA3   | 0.26  | 6.99  | 2.88  | 0.0048862 | 0.022012  | -2.88 |
| ILMN_1787885 | NUDT18   | -0.11 | 7.34  | -2.88 | 0.004886  | 0.022012  | -2.88 |
| ILMN_2412475 | NA       | -0.10 | 6.59  | -2.88 | 0.0048929 | 0.0220393 | -2.87 |
| ILMN_3250614 | EIF2AK1  | -0.10 | 7.10  | -2.88 | 0.0048973 | 0.0220563 | -2.88 |
| ILMN_1706817 | SERP1    | 0.16  | 8.78  | 2.88  | 0.0049019 | 0.0220737 | -2.88 |
| ILMN_2214734 | FRRS1    | -0.09 | 6.96  | -2.88 | 0.0049053 | 0.0220865 | -2.88 |
| ILMN_1718488 | MMEL1    | -0.10 | 6.60  | -2.88 | 0.0049081 | 0.0220961 | -2.88 |
| ILMN_1750409 | RAB9A    | -0.13 | 9.34  | -2.88 | 0.0049149 | 0.0221238 | -2.88 |
| ILMN_1747630 | DEK      | 0.16  | 9.46  | 2.88  | 0.0049191 | 0.0221368 | -2.88 |
| ILMN_1780141 | SARAF    | 0.10  | 11.59 | 2.88  | 0.0049186 | 0.0221368 | -2.88 |
| ILMN_1651936 | KMT5A    | 0.10  | 7.43  | 2.88  | 0.0049208 | 0.0221416 | -2.88 |
| ILMN_1664698 | UNC119   | -0.14 | 7.28  | -2.88 | 0.0049252 | 0.0221526 | -2.88 |
| ILMN_1695972 | CCDC89   | -0.08 | 6.57  | -2.88 | 0.0049246 | 0.0221526 | -2.89 |
| ILMN_1729546 | C19orf54 | -0.11 | 6.99  | -2.88 | 0.0049247 | 0.0221526 | -2.89 |
| ILMN_1698072 | PITRM1   | 0.14  | 7.96  | 2.88  | 0.0049307 | 0.0221744 | -2.89 |
| ILMN_1679003 | NA       | -0.10 | 6.82  | -2.88 | 0.0049333 | 0.0221836 | -2.89 |
| ILMN_1653501 | SEMA3B   | -0.16 | 7.36  | -2.88 | 0.0049352 | 0.0221857 | -2.89 |
| ILMN_1788789 | CHRNA7   | -0.09 | 6.55  | -2.88 | 0.0049357 | 0.0221857 | -2.89 |
| ILMN_1798690 | ADAMTSL3 | 0.12  | 6.70  | 2.88  | 0.0049352 | 0.0221857 | -2.89 |
| ILMN_1720794 | SNORD4B  | 0.08  | 6.53  | 2.88  | 0.0049393 | 0.0221987 | -2.89 |
| ILMN_1670708 | F10      | 0.08  | 6.44  | 2.88  | 0.0049479 | 0.0222345 | -2.89 |
| ILMN_3306742 | SIGMAR1  | -0.11 | 7.72  | -2.88 | 0.0049489 | 0.0222364 | -2.89 |
| ILMN_2279339 | WTAP     | 0.14  | 9.60  | 2.88  | 0.0049528 | 0.0222508 | -2.89 |
| ILMN_1756723 | DPP7     | 0.10  | 6.70  | 2.88  | 0.0049551 | 0.0222583 | -2.89 |
| ILMN_1670695 | BACH2    | 0.11  | 6.71  | 2.87  | 0.0049572 | 0.0222588 | -2.89 |
| ILMN_1765954 | HSD17B3  | -0.08 | 6.50  | -2.88 | 0.0049559 | 0.0222588 | -2.89 |
| ILMN_1785795 | METAP1   | -0.11 | 9.62  | -2.87 | 0.0049571 | 0.0222588 | -2.89 |



|              |           |       |       |       |           |           |       |
|--------------|-----------|-------|-------|-------|-----------|-----------|-------|
| ILMN_3235907 | XRCC6P5   | -0.08 | 6.48  | -2.87 | 0.0049685 | 0.022307  | -2.89 |
| ILMN_2112811 | NA        | 0.10  | 6.81  | 2.87  | 0.0049778 | 0.0223455 | -2.89 |
| ILMN_1917290 | LAMP2     | -0.13 | 7.35  | -2.87 | 0.0049889 | 0.0223926 | -2.90 |
| ILMN_3237665 | COX7A2L   | -0.13 | 9.93  | -2.87 | 0.0049948 | 0.0224161 | -2.90 |
| ILMN_1652602 | LMNTD2    | -0.09 | 6.58  | -2.87 | 0.0049972 | 0.022421  | -2.89 |
| ILMN_1752247 | AKAP13    | 0.12  | 7.30  | 2.87  | 0.0049971 | 0.022421  | -2.90 |
| ILMN_1776325 | UBE2Q1    | -0.12 | 7.79  | -2.87 | 0.0049978 | 0.022421  | -2.90 |
| ILMN_1659029 | DENND6B   | 0.13  | 7.51  | 2.87  | 0.0050022 | 0.0224378 | -2.90 |
| ILMN_1726104 | ANAPC15   | -0.12 | 7.36  | -2.87 | 0.0050064 | 0.0224506 | -2.90 |
| ILMN_2370622 | F8        | 0.06  | 6.31  | 2.87  | 0.0050064 | 0.0224506 | -2.90 |
| ILMN_1707858 | H2AFZ     | 0.16  | 11.27 | 2.87  | 0.005015  | 0.0224834 | -2.90 |
| ILMN_2144574 | CTBS      | -0.11 | 7.12  | -2.87 | 0.0050149 | 0.0224834 | -2.90 |
| ILMN_2376416 | UBXN11    | 0.09  | 6.79  | 2.87  | 0.0050174 | 0.022491  | -2.90 |
| ILMN_1693092 | SYNPO2    | 0.10  | 6.52  | 2.87  | 0.0050187 | 0.0224942 | -2.90 |
| ILMN_1880406 | PTEN      | -0.12 | 10.22 | -2.87 | 0.0050226 | 0.0225088 | -2.90 |
| ILMN_1669447 | PYHIN1    | 0.17  | 6.71  | 2.87  | 0.0050243 | 0.0225113 | -2.90 |
| ILMN_2150352 | CBWD5     | 0.15  | 7.56  | 2.87  | 0.0050245 | 0.0225113 | -2.90 |
| ILMN_1686464 | SLCO4C1   | -0.13 | 6.52  | -2.87 | 0.0050336 | 0.0225492 | -2.91 |
| ILMN_1763000 | ADAP2     | 0.19  | 7.59  | 2.87  | 0.0050362 | 0.0225577 | -2.91 |
| ILMN_1661589 | CD151     | -0.22 | 7.68  | -2.87 | 0.0050404 | 0.022574  | -2.91 |
| ILMN_1654195 | GCC2      | -0.07 | 6.43  | -2.87 | 0.0050423 | 0.0225795 | -2.91 |
| ILMN_1691611 | HNRNPA1P1 | 0.21  | 10.58 | 2.87  | 0.0050539 | 0.0226282 | -2.91 |
| ILMN_2378696 | GFM2      | -0.09 | 6.57  | -2.87 | 0.0050616 | 0.0226597 | -2.91 |
| ILMN_1660693 | SYN1      | 0.06  | 6.25  | 2.87  | 0.0050659 | 0.0226761 | -2.91 |
| ILMN_1699937 | NA        | 0.07  | 6.42  | 2.87  | 0.0050677 | 0.0226812 | -2.91 |
| ILMN_1738684 | NRXN2     | -0.12 | 6.76  | -2.87 | 0.0050834 | 0.0227461 | -2.91 |
| ILMN_3231596 | PLXNA4    | -0.11 | 6.89  | -2.87 | 0.0050835 | 0.0227461 | -2.91 |
| ILMN_1794707 | ATHL1     | 0.28  | 7.66  | 2.87  | 0.0050846 | 0.022748  | -2.91 |
| ILMN_1736730 | LRRC16A   | -0.19 | 8.52  | -2.87 | 0.0050878 | 0.0227593 | -2.92 |
| ILMN_2344455 | G3BP1     | 0.17  | 7.48  | 2.87  | 0.0050887 | 0.0227603 | -2.92 |
| ILMN_2125747 | NA        | 0.33  | 7.50  | 2.87  | 0.0050911 | 0.0227682 | -2.92 |
| ILMN_1677452 | REXO4     | -0.14 | 7.88  | -2.87 | 0.0051021 | 0.0228146 | -2.92 |
| ILMN_1766171 | SNF8      | -0.16 | 8.50  | -2.86 | 0.0051158 | 0.022873  | -2.91 |
| ILMN_1685761 | WFDC6     | -0.07 | 6.44  | -2.86 | 0.00512   | 0.0228886 | -2.92 |
| ILMN_1665943 | MAP4K1    | 0.36  | 7.81  | 2.86  | 0.005129  | 0.0229184 | -2.92 |
| ILMN_1702237 | FKBP1A    | 0.12  | 6.85  | 2.86  | 0.0051293 | 0.0229184 | -2.92 |
| ILMN_1754562 | ARHGEF17  | 0.08  | 6.65  | 2.86  | 0.0051299 | 0.0229184 | -2.92 |
| ILMN_2127722 | FAM174A   | 0.09  | 6.53  | 2.86  | 0.0051306 | 0.0229184 | -2.92 |
| ILMN_3235325 | NA        | -0.08 | 6.78  | -2.86 | 0.00513   | 0.0229184 | -2.92 |
| ILMN_3242357 | NA        | 0.10  | 6.89  | 2.86  | 0.0051302 | 0.0229184 | -2.92 |
| ILMN_2389582 | HNRNPL    | 0.15  | 8.73  | 2.86  | 0.0051349 | 0.0229342 | -2.92 |
| ILMN_1768077 | TCTN3     | -0.11 | 7.09  | -2.86 | 0.0051425 | 0.0229655 | -2.93 |
| ILMN_1705907 | NUP153    | 0.14  | 7.97  | 2.86  | 0.0051452 | 0.0229746 | -2.92 |
| ILMN_1717976 | BCL2L14   | -0.09 | 6.62  | -2.86 | 0.0051544 | 0.0230126 | -2.93 |
| ILMN_1706376 | OSBP      | -0.10 | 9.94  | -2.86 | 0.0051652 | 0.0230536 | -2.93 |
| ILMN_1731135 | RAB11B    | -0.07 | 6.51  | -2.86 | 0.0051663 | 0.0230536 | -2.92 |
| ILMN_1825773 | NA        | -0.11 | 6.73  | -2.86 | 0.0051659 | 0.0230536 | -2.93 |
| ILMN_3293681 | PINLYP    | -0.10 | 6.89  | -2.86 | 0.0051651 | 0.0230536 | -2.93 |

|              |            |       |       |       |           |           |       |
|--------------|------------|-------|-------|-------|-----------|-----------|-------|
| ILMN_1739641 | MTMR3      | 0.10  | 8.82  | 2.86  | 0.0051704 | 0.0230691 | -2.93 |
| ILMN_1775432 | CSMD2      | 0.08  | 6.70  | 2.86  | 0.005174  | 0.0230823 | -2.93 |
| ILMN_3310421 | MIR1292    | 0.07  | 6.38  | 2.86  | 0.0051787 | 0.0231002 | -2.93 |
| ILMN_3273854 | HNRNPA2B1  | 0.14  | 8.85  | 2.86  | 0.0051862 | 0.0231306 | -2.93 |
| ILMN_1802106 | APOBEC3G   | 0.15  | 6.84  | 2.86  | 0.0051927 | 0.0231565 | -2.93 |
| ILMN_2169692 | SCN9A      | -0.08 | 6.43  | -2.86 | 0.0051935 | 0.0231574 | -2.93 |
| ILMN_1752086 | TRAPPC11   | -0.11 | 8.54  | -2.86 | 0.0051972 | 0.0231707 | -2.93 |
| ILMN_1691790 | DACT2      | -0.09 | 6.45  | -2.86 | 0.0052008 | 0.0231835 | -2.93 |
| ILMN_1856009 | GRIK3      | -0.08 | 6.55  | -2.86 | 0.0052021 | 0.0231865 | -2.94 |
| ILMN_1743806 | MIF4GD     | 0.12  | 7.74  | 2.86  | 0.0052081 | 0.0232102 | -2.94 |
| ILMN_1721629 | ZNF654     | -0.10 | 7.11  | -2.86 | 0.0052114 | 0.0232222 | -2.93 |
| ILMN_1741599 | MEMO1      | 0.11  | 7.32  | 2.86  | 0.0052133 | 0.0232276 | -2.94 |
| ILMN_1702837 | PSMD1      | 0.18  | 8.92  | 2.86  | 0.005214  | 0.0232277 | -2.94 |
| ILMN_2381064 | TPD52      | -0.20 | 8.95  | -2.86 | 0.0052155 | 0.0232311 | -2.94 |
| ILMN_1663099 | UBE2B      | -0.07 | 6.68  | -2.86 | 0.0052464 | 0.0233641 | -2.94 |
| ILMN_1686043 | ZC2HC1C    | -0.08 | 6.57  | -2.86 | 0.0052474 | 0.0233641 | -2.94 |
| ILMN_1744275 | OR2D2      | -0.08 | 6.39  | -2.86 | 0.005247  | 0.0233641 | -2.94 |
| ILMN_1692295 | MYO1G      | 0.16  | 6.96  | 2.85  | 0.005262  | 0.0234264 | -2.95 |
| ILMN_1745860 | WEE2-AS1   | -0.08 | 6.66  | -2.85 | 0.0052678 | 0.0234489 | -2.95 |
| ILMN_1709257 | RIPPLY3    | 0.10  | 6.48  | 2.85  | 0.0052698 | 0.0234549 | -2.95 |
| ILMN_1677837 | UBTFL1     | -0.09 | 6.32  | -2.85 | 0.0052773 | 0.0234821 | -2.95 |
| ILMN_1700584 | IER2       | 0.12  | 7.02  | 2.85  | 0.0052769 | 0.0234821 | -2.95 |
| ILMN_1671992 | NA         | -0.18 | 8.67  | -2.85 | 0.0052802 | 0.0234922 | -2.95 |
| ILMN_1854833 | NA         | 0.11  | 7.58  | 2.85  | 0.0052902 | 0.0235337 | -2.95 |
| ILMN_1794927 | NA         | 0.29  | 6.88  | 2.85  | 0.0052916 | 0.0235339 | -2.95 |
| ILMN_3284109 | LOC1001293 | -0.09 | 6.54  | -2.85 | 0.0052915 | 0.0235339 | -2.95 |
| ILMN_1716821 | GORASP1    | -0.11 | 8.22  | -2.85 | 0.005303  | 0.0235791 | -2.95 |
| ILMN_1718552 | CXCL13     | 0.56  | 7.53  | 2.85  | 0.0053032 | 0.0235791 | -2.95 |
| ILMN_1665601 | THAP4      | -0.15 | 7.45  | -2.85 | 0.0053077 | 0.023596  | -2.95 |
| ILMN_1696708 | C14orf166  | 0.11  | 9.73  | 2.85  | 0.0053162 | 0.023631  | -2.94 |
| ILMN_2395932 | UNC45A     | 0.17  | 8.71  | 2.85  | 0.0053198 | 0.0236437 | -2.96 |
| ILMN_1714296 | DNAH2      | 0.09  | 6.53  | 2.85  | 0.0053264 | 0.0236671 | -2.96 |
| ILMN_1788439 | NA         | -0.11 | 6.80  | -2.85 | 0.0053264 | 0.0236671 | -2.96 |
| ILMN_1766675 | CDH6       | 0.08  | 6.52  | 2.85  | 0.0053734 | 0.0238696 | -2.96 |
| ILMN_1797813 | SUZ12      | 0.13  | 10.21 | 2.85  | 0.0053732 | 0.0238696 | -2.96 |
| ILMN_2415011 | DCTD       | 0.12  | 7.43  | 2.85  | 0.0053764 | 0.0238802 | -2.97 |
| ILMN_1798841 | PLCXD3     | 0.08  | 6.50  | 2.85  | 0.0053811 | 0.0238977 | -2.97 |
| ILMN_1662158 | RPL26L1    | 0.10  | 7.16  | 2.85  | 0.0053844 | 0.0239092 | -2.97 |
| ILMN_1698179 | TAGLN3     | 0.08  | 6.37  | 2.85  | 0.0053913 | 0.0239371 | -2.97 |
| ILMN_1760335 | ADPRHL1    | -0.12 | 6.65  | -2.85 | 0.0054008 | 0.0239762 | -2.97 |
| ILMN_2209180 | RPRD1A     | 0.10  | 9.13  | 2.84  | 0.005412  | 0.0240229 | -2.97 |
| ILMN_2139761 | LIMCH1     | 0.14  | 7.48  | 2.84  | 0.0054171 | 0.0240422 | -2.97 |
| ILMN_1721704 | FNTA       | -0.13 | 8.89  | -2.84 | 0.0054187 | 0.0240462 | -2.97 |
| ILMN_1689136 | NA         | -0.08 | 6.47  | -2.84 | 0.0054215 | 0.0240533 | -2.97 |
| ILMN_1725241 | GSTK1      | -0.15 | 10.79 | -2.84 | 0.0054217 | 0.0240533 | -2.97 |
| ILMN_2365111 | MAP4K1     | 0.18  | 6.71  | 2.84  | 0.0054235 | 0.0240581 | -2.97 |
| ILMN_1680378 | RBM45      | -0.10 | 7.69  | -2.84 | 0.0054296 | 0.0240821 | -2.97 |
| ILMN_1700674 | NA         | 0.20  | 11.86 | 2.84  | 0.0054342 | 0.0240994 | -2.98 |

|              |           |       |       |       |           |           |       |
|--------------|-----------|-------|-------|-------|-----------|-----------|-------|
| ILMN_1710092 | ZBTB46    | 0.09  | 6.79  | 2.84  | 0.0054382 | 0.024114  | -2.98 |
| ILMN_1685930 | DNAJC24   | 0.09  | 7.17  | 2.84  | 0.0054494 | 0.0241607 | -2.98 |
| ILMN_1660275 | LDAH      | -0.10 | 7.19  | -2.84 | 0.0054614 | 0.0242107 | -2.98 |
| ILMN_1717357 | AIFM1     | -0.10 | 7.03  | -2.84 | 0.0054712 | 0.0242509 | -2.98 |
| ILMN_1768399 | ARFIP1    | -0.10 | 6.77  | -2.84 | 0.0054759 | 0.0242659 | -2.98 |
| ILMN_1775853 | MAGI1     | -0.10 | 6.73  | -2.84 | 0.0054755 | 0.0242659 | -2.98 |
| ILMN_1655780 | METTL10   | -0.08 | 6.73  | -2.84 | 0.0054881 | 0.0243167 | -2.98 |
| ILMN_1726456 | SLC3A2    | 0.14  | 8.07  | 2.84  | 0.0055007 | 0.024366  | -2.99 |
| ILMN_2246510 | TSC1      | -0.13 | 8.45  | -2.84 | 0.0055002 | 0.024366  | -2.99 |
| ILMN_3276019 | NA        | 0.17  | 7.66  | 2.84  | 0.0055069 | 0.0243904 | -2.99 |
| ILMN_1666482 | SP2       | -0.08 | 7.34  | -2.84 | 0.0055105 | 0.0244034 | -2.99 |
| ILMN_2410975 | ATG9A     | -0.14 | 7.92  | -2.84 | 0.0055139 | 0.0244151 | -2.99 |
| ILMN_1662768 | SLC9B2    | 0.09  | 6.43  | 2.84  | 0.0055257 | 0.0244642 | -2.99 |
| ILMN_1679357 | NA        | 0.95  | 7.74  | 2.84  | 0.0055369 | 0.0245109 | -2.99 |
| ILMN_2193752 | MBLAC2    | 0.08  | 6.63  | 2.84  | 0.0055401 | 0.0245185 | -2.99 |
| ILMN_2372040 | MTFP1     | -0.08 | 6.61  | -2.84 | 0.0055397 | 0.0245185 | -2.99 |
| ILMN_1705515 | UPF3A     | -0.11 | 7.89  | -2.84 | 0.0055483 | 0.0245517 | -2.99 |
| ILMN_1753393 | OSGEP     | -0.11 | 7.51  | -2.84 | 0.0055511 | 0.0245613 | -2.99 |
| ILMN_1745885 | POLR2F    | -0.12 | 9.49  | -2.84 | 0.0055527 | 0.0245649 | -2.99 |
| ILMN_1784678 | PBX1      | 0.07  | 6.52  | 2.84  | 0.0055588 | 0.0245887 | -3.00 |
| ILMN_2348050 | MRPL21    | -0.18 | 8.49  | -2.84 | 0.0055649 | 0.0246126 | -3.00 |
| ILMN_1654653 | KLC1      | 0.10  | 7.41  | 2.84  | 0.0055665 | 0.0246164 | -2.99 |
| ILMN_1807491 | LAIR2     | 0.20  | 6.71  | 2.83  | 0.0055686 | 0.024622  | -3.00 |
| ILMN_2292387 | TANK      | 0.08  | 6.57  | 2.83  | 0.0055691 | 0.024622  | -3.00 |
| ILMN_2369682 | HNRNPA2B1 | 0.12  | 11.56 | 2.83  | 0.0055775 | 0.0246556 | -3.00 |
| ILMN_1753342 | SAT1      | 0.16  | 12.06 | 2.83  | 0.0055798 | 0.0246625 | -3.00 |
| ILMN_1706057 | CS        | -0.13 | 10.61 | -2.83 | 0.0055914 | 0.0247075 | -3.00 |
| ILMN_1794442 | ZNF469    | 0.08  | 6.52  | 2.83  | 0.0055912 | 0.0247075 | -3.00 |
| ILMN_1815303 | RMDN1     | 0.13  | 7.96  | 2.83  | 0.0055969 | 0.0247289 | -3.00 |
| ILMN_1805466 | SOX9      | 0.21  | 8.44  | 2.83  | 0.0056083 | 0.0247728 | -3.00 |
| ILMN_1814315 | PBXIP1    | 0.08  | 6.65  | 2.83  | 0.0056078 | 0.0247728 | -3.00 |
| ILMN_1708502 | AFF4      | 0.17  | 8.34  | 2.83  | 0.005613  | 0.0247879 | -3.00 |
| ILMN_1766178 | DRICH1    | -0.07 | 6.46  | -2.83 | 0.0056132 | 0.0247879 | -3.00 |
| ILMN_1726967 | TWSG1     | 0.11  | 7.05  | 2.83  | 0.0056176 | 0.0248024 | -3.01 |
| ILMN_2366391 | PRDX1     | 0.17  | 11.00 | 2.83  | 0.0056179 | 0.0248024 | -3.01 |
| ILMN_1732705 | HCFC1     | 0.11  | 9.33  | 2.83  | 0.0056262 | 0.0248362 | -3.01 |
| ILMN_1776724 | LYPD6     | -0.11 | 6.75  | -2.83 | 0.0056286 | 0.0248432 | -3.01 |
| ILMN_1749409 | HLA-J     | -0.13 | 6.89  | -2.83 | 0.0056344 | 0.0248658 | -3.01 |
| ILMN_1798753 | NA        | -0.09 | 6.41  | -2.83 | 0.0056356 | 0.0248678 | -3.01 |
| ILMN_1751656 | KLF11     | 0.18  | 7.98  | 2.83  | 0.0056383 | 0.0248733 | -3.01 |
| ILMN_2216582 | LYL1      | 0.31  | 7.81  | 2.83  | 0.0056379 | 0.0248733 | -3.01 |
| ILMN_1811702 | GRN       | -0.17 | 8.79  | -2.83 | 0.0056411 | 0.0248827 | -3.01 |
| ILMN_1710756 | ENO1      | 0.15  | 11.73 | 2.83  | 0.0056446 | 0.0248949 | -3.01 |
| ILMN_2140910 | OR5P3     | -0.07 | 6.27  | -2.83 | 0.0056469 | 0.0249019 | -3.00 |
| ILMN_1689874 | HOXB3     | -0.10 | 6.65  | -2.83 | 0.005649  | 0.0249079 | -3.01 |
| ILMN_1806754 | GLDC      | -0.14 | 6.64  | -2.83 | 0.0056497 | 0.0249079 | -3.01 |
| ILMN_1651652 | RTN3      | -0.07 | 6.45  | -2.83 | 0.0056536 | 0.0249218 | -3.01 |
| ILMN_2046470 | DAAM1     | 0.13  | 8.38  | 2.83  | 0.0056567 | 0.0249321 | -3.01 |

|              |          |       |       |       |           |           |       |
|--------------|----------|-------|-------|-------|-----------|-----------|-------|
| ILMN_2124523 | METTL14  | -0.09 | 6.83  | -2.83 | 0.0056583 | 0.0249362 | -3.01 |
| ILMN_1793040 | ADAMTSL5 | 0.10  | 6.67  | 2.83  | 0.0056753 | 0.0250079 | -3.01 |
| ILMN_1767337 | SFXN5    | -0.12 | 6.96  | -2.83 | 0.0056823 | 0.0250355 | -3.02 |
| ILMN_2095840 | KAT6A    | 0.12  | 9.10  | 2.83  | 0.0056888 | 0.025061  | -3.01 |
| ILMN_2400407 | CNTN1    | 0.07  | 6.41  | 2.83  | 0.0056908 | 0.0250666 | -3.02 |
| ILMN_1658109 | ADCY10P1 | -0.07 | 6.42  | -2.83 | 0.0056926 | 0.0250713 | -3.02 |
| ILMN_1658695 | NUF2     | 0.09  | 6.69  | 2.83  | 0.0057021 | 0.0251101 | -3.02 |
| ILMN_2330552 | NA       | -0.13 | 7.10  | -2.83 | 0.0057065 | 0.0251263 | -3.02 |
| ILMN_1715173 | RPS6KA1  | -0.18 | 8.68  | -2.83 | 0.0057097 | 0.0251368 | -3.01 |
| ILMN_1757914 | WDR83OS  | -0.09 | 9.41  | -2.83 | 0.0057153 | 0.0251582 | -3.02 |
| ILMN_1771057 | XAB2     | 0.12  | 8.26  | 2.83  | 0.0057257 | 0.0252012 | -3.02 |
| ILMN_3201393 | BMS1     | 0.08  | 6.33  | 2.83  | 0.0057274 | 0.0252052 | -3.02 |
| ILMN_2089329 | SPRY2    | 0.18  | 9.26  | 2.82  | 0.0057311 | 0.0252181 | -3.02 |
| ILMN_2406299 | SEMA3B   | -0.11 | 6.82  | -2.82 | 0.0057368 | 0.0252401 | -3.02 |
| ILMN_2337336 | NECTIN2  | 0.11  | 6.95  | 2.82  | 0.0057497 | 0.0252937 | -3.03 |
| ILMN_1751975 | ALOX15B  | 0.08  | 6.42  | 2.82  | 0.0057547 | 0.0253124 | -3.03 |
| ILMN_2412380 | TSC22D1  | 0.21  | 8.36  | 2.82  | 0.0057669 | 0.025363  | -3.03 |
| ILMN_1699711 | DEDD     | 0.08  | 6.88  | 2.82  | 0.0057753 | 0.0253966 | -3.03 |
| ILMN_1694385 | YWHAB    | -0.09 | 11.45 | -2.82 | 0.0057937 | 0.0254742 | -3.03 |
| ILMN_1676173 | PARVB    | 0.07  | 6.38  | 2.82  | 0.0057964 | 0.0254827 | -3.03 |
| ILMN_1692785 | KLHL21   | 0.10  | 6.70  | 2.82  | 0.0057977 | 0.0254855 | -3.03 |
| ILMN_3251733 | C19orf43 | -0.10 | 9.01  | -2.82 | 0.005802  | 0.025501  | -3.03 |
| ILMN_1687805 | RPS12    | 0.10  | 13.15 | 2.82  | 0.0058036 | 0.0255049 | -3.03 |
| ILMN_2044617 | MTERF3   | 0.11  | 8.32  | 2.82  | 0.0058086 | 0.0255234 | -3.04 |
| ILMN_1795227 | DYNLL1   | -0.10 | 11.76 | -2.82 | 0.005814  | 0.0255438 | -3.04 |
| ILMN_3246673 | SLC35G6  | -0.08 | 6.67  | -2.82 | 0.0058158 | 0.0255487 | -3.04 |
| ILMN_3241169 | ELP6     | -0.11 | 7.65  | -2.82 | 0.005819  | 0.0255594 | -3.04 |
| ILMN_1722811 | CDKN1B   | 0.16  | 8.17  | 2.82  | 0.0058353 | 0.0256276 | -3.04 |
| ILMN_1804498 | BRAT1    | -0.11 | 8.72  | -2.82 | 0.0058413 | 0.0256507 | -3.04 |
| ILMN_1675701 | FAM114A2 | 0.07  | 6.54  | 2.82  | 0.0058476 | 0.0256752 | -3.04 |
| ILMN_1805737 | PFKP     | 0.21  | 9.16  | 2.82  | 0.0058525 | 0.0256937 | -3.04 |
| ILMN_3190029 | GUCY2GP  | 0.07  | 6.46  | 2.82  | 0.0058545 | 0.0256992 | -3.04 |
| ILMN_1757272 | THAP1    | -0.10 | 7.18  | -2.82 | 0.0058565 | 0.0257046 | -3.04 |
| ILMN_1670975 | ERICH5   | -0.09 | 6.65  | -2.82 | 0.0058588 | 0.0257114 | -3.04 |
| ILMN_2124790 | NA       | -0.08 | 6.45  | -2.82 | 0.0058601 | 0.0257135 | -3.04 |
| ILMN_2193175 | TIMMDC1  | -0.07 | 6.84  | -2.82 | 0.0058703 | 0.025753  | -3.04 |
| ILMN_3236259 | NA       | 0.13  | 12.53 | 2.82  | 0.0058705 | 0.025753  | -3.04 |
| ILMN_1882045 | NA       | -0.09 | 6.46  | -2.82 | 0.0058776 | 0.0257808 | -3.05 |
| ILMN_1699772 | RRAGD    | 0.13  | 7.18  | 2.82  | 0.0058943 | 0.0258505 | -3.05 |
| ILMN_1662417 | LRPPRC   | -0.17 | 8.48  | -2.81 | 0.0059131 | 0.0259297 | -3.05 |
| ILMN_1761155 | PABPC1   | 0.12  | 11.92 | 2.81  | 0.0059144 | 0.0259322 | -3.05 |
| ILMN_2259633 | KMT2E    | -0.12 | 7.99  | -2.81 | 0.005934  | 0.0260148 | -3.05 |
| ILMN_2407799 | IL24     | 0.09  | 6.79  | 2.81  | 0.0059377 | 0.0260279 | -3.06 |
| ILMN_3187324 | CNRIP1   | 0.09  | 6.61  | 2.81  | 0.0059386 | 0.0260286 | -3.06 |
| ILMN_3300358 | ZNF84    | -0.11 | 7.39  | -2.81 | 0.0059524 | 0.0260856 | -3.06 |
| ILMN_1807825 | LY86     | 0.20  | 7.20  | 2.81  | 0.0059603 | 0.0261167 | -3.06 |
| ILMN_1774973 | SNORD21  | 0.09  | 6.66  | 2.81  | 0.0059668 | 0.0261419 | -3.06 |
| ILMN_1800152 | MAVS     | -0.12 | 6.68  | -2.81 | 0.0059734 | 0.0261674 | -3.06 |

|              |           |       |       |       |           |           |       |
|--------------|-----------|-------|-------|-------|-----------|-----------|-------|
| ILMN_2058782 | IFI27     | -0.35 | 11.95 | -2.81 | 0.0059741 | 0.0261675 | -3.06 |
| ILMN_1803143 | SYVN1     | 0.19  | 9.16  | 2.81  | 0.0059878 | 0.0262239 | -3.06 |
| ILMN_3225624 | TATDN1    | -0.07 | 6.35  | -2.81 | 0.0059953 | 0.0262534 | -3.06 |
| ILMN_2310253 | TARBP2    | -0.09 | 6.83  | -2.81 | 0.0059972 | 0.0262586 | -3.06 |
| ILMN_2377733 | CASP8     | 0.08  | 6.53  | 2.81  | 0.0060286 | 0.0263926 | -3.07 |
| ILMN_2116516 | SCRN3     | -0.09 | 6.71  | -2.81 | 0.0060314 | 0.0264014 | -3.07 |
| ILMN_1707872 | RUFY2     | -0.07 | 6.63  | -2.81 | 0.0060402 | 0.0264364 | -3.07 |
| ILMN_1716368 | PRIMPOL   | -0.09 | 6.99  | -2.81 | 0.0060409 | 0.0264364 | -3.07 |
| ILMN_1656045 | CELF6     | -0.09 | 6.77  | -2.81 | 0.006047  | 0.0264596 | -3.07 |
| ILMN_2221076 | NCBP3     | -0.10 | 7.59  | -2.81 | 0.006055  | 0.0264915 | -3.07 |
| ILMN_1750880 | AMN1      | 0.07  | 6.58  | 2.81  | 0.006056  | 0.0264924 | -3.07 |
| ILMN_1727390 | ATPAF2    | -0.09 | 6.64  | -2.81 | 0.0060663 | 0.026534  | -3.07 |
| ILMN_1715703 | DALRD3    | -0.09 | 6.60  | -2.80 | 0.0060852 | 0.0266134 | -3.08 |
| ILMN_1751034 | ITPRIPL2  | 0.23  | 8.89  | 2.80  | 0.0060922 | 0.0266385 | -3.08 |
| ILMN_3300744 | PRELID1   | -0.21 | 9.18  | -2.80 | 0.0060925 | 0.0266385 | -3.08 |
| ILMN_1700349 | ADCK4     | -0.09 | 6.92  | -2.80 | 0.006094  | 0.0266418 | -3.08 |
| ILMN_3246590 | EXOC3L1   | 0.09  | 6.43  | 2.80  | 0.0061001 | 0.0266652 | -3.08 |
| ILMN_3237473 | NA        | -0.08 | 6.40  | -2.80 | 0.0061073 | 0.0266931 | -3.08 |
| ILMN_1669796 | NA        | -0.07 | 6.49  | -2.80 | 0.0061168 | 0.0267312 | -3.08 |
| ILMN_3245697 | TOMM20L   | -0.06 | 6.46  | -2.80 | 0.0061203 | 0.0267398 | -3.08 |
| ILMN_3247082 | FAM150B   | -0.21 | 7.41  | -2.80 | 0.0061201 | 0.0267398 | -3.08 |
| ILMN_1810826 | NAA35     | -0.09 | 7.28  | -2.80 | 0.0061243 | 0.0267539 | -3.08 |
| ILMN_1784780 | CIC       | 0.09  | 7.06  | 2.80  | 0.0061291 | 0.0267712 | -3.08 |
| ILMN_1881052 | NA        | -0.08 | 6.60  | -2.80 | 0.0061325 | 0.0267831 | -3.08 |
| ILMN_1813746 | CORO2A    | -0.27 | 8.58  | -2.80 | 0.0061346 | 0.0267887 | -3.08 |
| ILMN_1660357 | LINC-PINT | 0.17  | 7.03  | 2.80  | 0.006136  | 0.0267914 | -3.08 |
| ILMN_1792075 | CD22      | 0.15  | 6.70  | 2.80  | 0.0061386 | 0.0267994 | -3.09 |
| ILMN_1728163 | CTDSP1    | -0.13 | 9.06  | -2.80 | 0.0061411 | 0.0268067 | -3.09 |
| ILMN_1743086 | UBE2Z     | -0.08 | 6.55  | -2.80 | 0.0061462 | 0.0268258 | -3.08 |
| ILMN_3241091 | TMEM164   | -0.20 | 9.06  | -2.80 | 0.00616   | 0.0268826 | -3.09 |
| ILMN_1749338 | ANKRD29   | 0.10  | 6.54  | 2.80  | 0.0061646 | 0.0268992 | -3.09 |
| ILMN_1713749 | CORO1A    | 0.34  | 7.70  | 2.80  | 0.0061667 | 0.0269049 | -3.09 |
| ILMN_1710863 | GATAD1    | -0.10 | 7.21  | -2.80 | 0.0061695 | 0.0269138 | -3.09 |
| ILMN_1720745 | NA        | 0.21  | 11.07 | 2.80  | 0.0061704 | 0.0269145 | -3.09 |
| ILMN_2204332 | FRYL      | -0.08 | 6.46  | -2.80 | 0.0061748 | 0.02693   | -3.09 |
| ILMN_1753823 | IL17D     | 0.09  | 6.69  | 2.80  | 0.006176  | 0.0269321 | -3.09 |
| ILMN_1808939 | RPS6      | 0.11  | 12.06 | 2.80  | 0.0061787 | 0.0269403 | -3.09 |
| ILMN_2406439 | SPTBN4    | -0.13 | 6.95  | -2.80 | 0.0061813 | 0.026948  | -3.09 |
| ILMN_3273383 | NA        | -0.08 | 6.54  | -2.80 | 0.0061887 | 0.0269771 | -3.09 |
| ILMN_1684628 | ZFP90     | 0.13  | 7.79  | 2.80  | 0.0061994 | 0.0270201 | -3.09 |
| ILMN_1800332 | NGB       | 0.07  | 6.40  | 2.80  | 0.0062037 | 0.0270355 | -3.09 |
| ILMN_1670611 | MFS6L     | -0.09 | 6.61  | -2.80 | 0.0062212 | 0.0271083 | -3.10 |
| ILMN_1732127 | RBKS      | -0.16 | 7.39  | -2.80 | 0.0062326 | 0.0271549 | -3.10 |
| ILMN_2337492 | RCE1      | -0.08 | 6.70  | -2.80 | 0.0062348 | 0.0271607 | -3.10 |
| ILMN_1700770 | PSKH1     | -0.08 | 6.60  | -2.80 | 0.0062358 | 0.0271619 | -3.10 |
| ILMN_1737709 | RPL10L    | -0.12 | 6.89  | -2.80 | 0.006243  | 0.0271899 | -3.10 |
| ILMN_1675794 | DDR2      | -0.07 | 6.45  | -2.79 | 0.0062562 | 0.0272439 | -3.10 |
| ILMN_1718984 | FCGBP     | -0.38 | 11.86 | -2.79 | 0.0062694 | 0.0272976 | -3.10 |

|              |           |       |       |       |           |           |       |
|--------------|-----------|-------|-------|-------|-----------|-----------|-------|
| ILMN_3272074 | GABPB1    | 0.08  | 6.50  | 2.79  | 0.0062705 | 0.0272993 | -3.10 |
| ILMN_1654543 | MED6      | 0.09  | 8.87  | 2.79  | 0.0062786 | 0.0273192 | -3.11 |
| ILMN_1678775 | NA        | 0.25  | 11.70 | 2.79  | 0.0062791 | 0.0273192 | -3.11 |
| ILMN_1695917 | C5orf15   | -0.13 | 9.68  | -2.79 | 0.006279  | 0.0273192 | -3.11 |
| ILMN_1729533 | NAXE      | -0.12 | 8.94  | -2.79 | 0.0062778 | 0.0273192 | -3.11 |
| ILMN_1784661 | TMEM2     | 0.14  | 9.08  | 2.79  | 0.0062786 | 0.0273192 | -3.11 |
| ILMN_2322597 | LYPD5     | 0.08  | 6.51  | 2.79  | 0.0062837 | 0.0273357 | -3.11 |
| ILMN_1776842 | NA        | 0.11  | 6.42  | 2.79  | 0.0062872 | 0.0273476 | -3.11 |
| ILMN_1694798 | C5orf28   | 0.10  | 6.73  | 2.79  | 0.006296  | 0.0273801 | -3.11 |
| ILMN_1751816 | MCTS1     | 0.14  | 7.44  | 2.79  | 0.0062962 | 0.0273801 | -3.10 |
| ILMN_1671221 | GAPVD1    | 0.09  | 8.53  | 2.79  | 0.0063    | 0.0273931 | -3.11 |
| ILMN_1769993 | LCN9      | -0.06 | 6.30  | -2.79 | 0.0063035 | 0.0274047 | -3.11 |
| ILMN_1725071 | CCDC12    | 0.11  | 8.44  | 2.79  | 0.0063047 | 0.0274066 | -3.11 |
| ILMN_3307757 | SCIMP     | 0.08  | 6.70  | 2.79  | 0.0063069 | 0.0274128 | -3.11 |
| ILMN_1728067 | OR2F1     | 0.07  | 6.24  | 2.79  | 0.0063092 | 0.0274164 | -3.11 |
| ILMN_2403911 | ARFIP1    | -0.07 | 6.53  | -2.79 | 0.0063094 | 0.0274164 | -3.10 |
| ILMN_1725079 | TSPAN31   | -0.12 | 8.43  | -2.79 | 0.0063149 | 0.027437  | -3.11 |
| ILMN_1713086 | RPL27A    | 0.11  | 13.22 | 2.79  | 0.006321  | 0.0274598 | -3.11 |
| ILMN_1747546 | TSPAN1    | -0.28 | 9.20  | -2.79 | 0.0063239 | 0.0274692 | -3.11 |
| ILMN_1804679 | KAT8      | -0.08 | 7.38  | -2.79 | 0.006325  | 0.0274707 | -3.11 |
| ILMN_1655422 | RPL17     | 0.22  | 9.46  | 2.79  | 0.0063266 | 0.0274738 | -3.11 |
| ILMN_1810181 | PCGF6     | 0.09  | 6.70  | 2.79  | 0.0063298 | 0.0274846 | -3.11 |
| ILMN_1788251 | SNN       | 0.12  | 6.71  | 2.79  | 0.006332  | 0.027487  | -3.11 |
| ILMN_3240781 | SNORD17   | 0.06  | 6.64  | 2.79  | 0.0063315 | 0.027487  | -3.11 |
| ILMN_1684168 | GSTZ1     | -0.09 | 6.63  | -2.79 | 0.0063352 | 0.0274939 | -3.10 |
| ILMN_1751400 | SKAP1     | 0.23  | 7.37  | 2.79  | 0.0063348 | 0.0274939 | -3.11 |
| ILMN_1667037 | MFSD4A    | -0.09 | 6.39  | -2.79 | 0.0063567 | 0.0275838 | -3.12 |
| ILMN_1725183 | TBCE      | -0.10 | 8.31  | -2.79 | 0.0063636 | 0.0276105 | -3.11 |
| ILMN_1809193 | PSEN1     | -0.08 | 6.49  | -2.79 | 0.0063758 | 0.0276597 | -3.12 |
| ILMN_1703273 | UACA      | 0.08  | 6.52  | 2.79  | 0.0063822 | 0.0276838 | -3.12 |
| ILMN_1737036 | GGT7      | -0.09 | 6.55  | -2.79 | 0.0063894 | 0.0277084 | -3.12 |
| ILMN_1827211 | NA        | -0.14 | 7.16  | -2.79 | 0.0063887 | 0.0277084 | -3.12 |
| ILMN_3240888 | FAM184B   | -0.07 | 6.60  | -2.79 | 0.0063926 | 0.0277188 | -3.12 |
| ILMN_1753439 | RPTN      | 0.07  | 6.38  | 2.79  | 0.0063957 | 0.0277286 | -3.12 |
| ILMN_1708805 | NCOA3     | 0.15  | 9.08  | 2.79  | 0.0063966 | 0.027729  | -3.12 |
| ILMN_1747355 | NA        | 0.22  | 6.77  | 2.79  | 0.0064083 | 0.0277761 | -3.12 |
| ILMN_1877156 | NA        | -0.08 | 6.46  | -2.79 | 0.0064091 | 0.0277761 | -3.12 |
| ILMN_2055700 | SLBP      | 0.15  | 7.51  | 2.79  | 0.0064115 | 0.0277832 | -3.12 |
| ILMN_3237627 | LOC154761 | 0.07  | 6.56  | 2.79  | 0.0064136 | 0.0277889 | -3.12 |
| ILMN_1727287 | PHF20L1   | 0.08  | 6.49  | 2.79  | 0.0064183 | 0.0278055 | -3.13 |
| ILMN_1675852 | PSMA6     | 0.09  | 10.68 | 2.79  | 0.0064207 | 0.0278127 | -3.13 |
| ILMN_2112599 | CFAP20    | -0.11 | 8.19  | -2.79 | 0.006423  | 0.0278192 | -3.12 |
| ILMN_1658884 | ATP11B    | -0.10 | 7.31  | -2.79 | 0.0064259 | 0.0278244 | -3.13 |
| ILMN_1794818 | LHX8      | 0.06  | 6.23  | 2.79  | 0.0064258 | 0.0278244 | -3.13 |
| ILMN_1846543 | NA        | 0.08  | 6.43  | 2.78  | 0.0064391 | 0.0278784 | -3.12 |
| ILMN_2352401 | ERBIN     | -0.09 | 6.59  | -2.78 | 0.0064549 | 0.027943  | -3.13 |
| ILMN_1787548 | HSPG2     | 0.06  | 6.43  | 2.78  | 0.0064672 | 0.0279895 | -3.13 |
| ILMN_2069821 | C4orf32   | 0.09  | 6.55  | 2.78  | 0.0064665 | 0.0279895 | -3.13 |

|              |           |       |       |       |           |           |       |
|--------------|-----------|-------|-------|-------|-----------|-----------|-------|
| ILMN_3247190 | TNS1      | -0.08 | 6.41  | -2.78 | 0.0064757 | 0.0280228 | -3.13 |
| ILMN_1658677 | DTX3      | 0.10  | 6.74  | 2.78  | 0.0064795 | 0.0280342 | -3.13 |
| ILMN_1663685 | NA        | -0.12 | 7.93  | -2.78 | 0.0064813 | 0.0280342 | -3.13 |
| ILMN_1857507 | NA        | -0.09 | 6.68  | -2.78 | 0.0064816 | 0.0280342 | -3.13 |
| ILMN_2160124 | HAUS3     | -0.08 | 6.42  | -2.78 | 0.0064809 | 0.0280342 | -3.13 |
| ILMN_1679150 | NA        | -0.09 | 6.70  | -2.78 | 0.0064906 | 0.0280589 | -3.14 |
| ILMN_1695851 | PARVG     | 0.20  | 7.19  | 2.78  | 0.0064896 | 0.0280589 | -3.14 |
| ILMN_1738816 | FOXO1     | 0.14  | 8.22  | 2.78  | 0.0064905 | 0.0280589 | -3.13 |
| ILMN_1788887 | LINC01089 | -0.12 | 6.77  | -2.78 | 0.0064884 | 0.0280589 | -3.14 |
| ILMN_3237878 | LILRA3    | 0.07  | 6.41  | 2.78  | 0.0064919 | 0.0280612 | -3.14 |
| ILMN_1706344 | ABHD6     | -0.16 | 7.88  | -2.78 | 0.0064957 | 0.028074  | -3.14 |
| ILMN_2173975 | RTP4      | -0.10 | 6.78  | -2.78 | 0.0065072 | 0.0281203 | -3.14 |
| ILMN_1661673 | NA        | 0.08  | 6.48  | 2.78  | 0.006511  | 0.0281331 | -3.14 |
| ILMN_1767691 | VPS25     | -0.15 | 8.17  | -2.78 | 0.00652   | 0.0281684 | -3.14 |
| ILMN_3245223 | ZSCAN30   | -0.07 | 6.47  | -2.78 | 0.0065218 | 0.0281725 | -3.14 |
| ILMN_2366334 | FERMT3    | 0.12  | 6.85  | 2.78  | 0.0065228 | 0.0281732 | -3.14 |
| ILMN_1778464 | TRAPPC10  | -0.11 | 7.41  | -2.78 | 0.0065238 | 0.0281743 | -3.14 |
| ILMN_1678404 | FBXO11    | 0.08  | 6.63  | 2.78  | 0.0065302 | 0.0281983 | -3.14 |
| ILMN_1789624 | TPM2      | 0.06  | 6.28  | 2.78  | 0.0065365 | 0.0282186 | -3.14 |
| ILMN_1790472 | SLC25A28  | 0.15  | 9.41  | 2.78  | 0.0065358 | 0.0282186 | -3.14 |
| ILMN_1766247 | ZBTB2     | 0.07  | 6.60  | 2.78  | 0.0065442 | 0.0282483 | -3.14 |
| ILMN_1745826 | KATNAL2   | -0.07 | 6.41  | -2.78 | 0.0065453 | 0.0282492 | -3.14 |
| ILMN_1813837 | C9orf9    | 0.07  | 6.48  | 2.78  | 0.0065543 | 0.0282848 | -3.14 |
| ILMN_1805064 | SCARNA9   | 0.18  | 7.36  | 2.78  | 0.0065561 | 0.0282868 | -3.14 |
| ILMN_3307602 | EPHA10    | -0.11 | 6.97  | -2.78 | 0.0065564 | 0.0282868 | -3.14 |
| ILMN_1697670 | SRRM1     | 0.11  | 10.00 | 2.78  | 0.0065635 | 0.0283139 | -3.15 |
| ILMN_1714600 | NAV3      | 0.08  | 6.42  | 2.78  | 0.0065731 | 0.0283516 | -3.14 |
| ILMN_2340052 | NCOR2     | 0.16  | 9.39  | 2.78  | 0.0065741 | 0.0283524 | -3.15 |
| ILMN_1701374 | NUP35     | 0.11  | 6.96  | 2.78  | 0.0065835 | 0.0283891 | -3.15 |
| ILMN_1723871 | OTUB1     | -0.11 | 7.58  | -2.78 | 0.0065893 | 0.0284107 | -3.15 |
| ILMN_2112128 | MAPK4     | 0.07  | 6.38  | 2.78  | 0.0065901 | 0.0284109 | -3.15 |
| ILMN_1684653 | ADGRF4    | -0.09 | 6.34  | -2.78 | 0.0066082 | 0.028485  | -3.15 |
| ILMN_2038775 | TUBB2A    | 0.19  | 7.27  | 2.77  | 0.0066163 | 0.0285165 | -3.15 |
| ILMN_1665289 | OGFOD3    | -0.09 | 6.73  | -2.77 | 0.0066203 | 0.0285301 | -3.15 |
| ILMN_1709877 | TRIML1    | -0.08 | 6.61  | -2.77 | 0.0066263 | 0.0285524 | -3.15 |
| ILMN_1723021 | ICMT      | -0.13 | 7.88  | -2.77 | 0.006628  | 0.0285563 | -3.15 |
| ILMN_2139396 | IGDCC4    | 0.15  | 7.09  | 2.77  | 0.0066425 | 0.0286151 | -3.16 |
| ILMN_1682981 | SMG6      | -0.09 | 6.74  | -2.77 | 0.0066443 | 0.0286192 | -3.16 |
| ILMN_2394750 | EXOC4     | -0.09 | 6.86  | -2.77 | 0.0066453 | 0.02862   | -3.16 |
| ILMN_1670707 | SPATA32   | -0.06 | 6.43  | -2.77 | 0.0066487 | 0.0286309 | -3.16 |
| ILMN_1778078 | VPS16     | -0.12 | 8.28  | -2.77 | 0.0066557 | 0.0286575 | -3.16 |
| ILMN_1746386 | HHLA1     | -0.07 | 6.49  | -2.77 | 0.0066585 | 0.0286662 | -3.16 |
| ILMN_1753819 | NA        | 0.13  | 8.38  | 2.77  | 0.006672  | 0.0287207 | -3.16 |
| ILMN_1731616 | DCLK1     | 0.08  | 6.67  | 2.77  | 0.0066802 | 0.0287524 | -3.16 |
| ILMN_1753862 | SRP54     | 0.10  | 9.63  | 2.77  | 0.0066815 | 0.0287542 | -3.16 |
| ILMN_1771964 | GSTA4     | 0.19  | 7.63  | 2.77  | 0.0066823 | 0.0287542 | -3.16 |
| ILMN_1815895 | NA        | 0.59  | 8.99  | 2.77  | 0.0066987 | 0.0288213 | -3.16 |
| ILMN_1705414 | ELP5      | -0.08 | 6.71  | -2.77 | 0.0067033 | 0.0288373 | -3.16 |

|              |           |       |       |       |           |           |       |
|--------------|-----------|-------|-------|-------|-----------|-----------|-------|
| ILMN_1740903 | C7orf49   | -0.10 | 7.17  | -2.77 | 0.0067197 | 0.0289044 | -3.17 |
| ILMN_2044226 | PPP3CA    | 0.12  | 6.90  | 2.77  | 0.0067218 | 0.02891   | -3.17 |
| ILMN_3246209 | SCARNA10  | 0.07  | 6.67  | 2.77  | 0.0067387 | 0.028979  | -3.17 |
| ILMN_2259818 | MELTF     | -0.07 | 6.62  | -2.77 | 0.0067403 | 0.028982  | -3.17 |
| ILMN_1680225 | OR2L2     | -0.08 | 6.44  | -2.77 | 0.0067465 | 0.0290051 | -3.17 |
| ILMN_1675483 | ANKMY1    | -0.12 | 7.43  | -2.77 | 0.0067706 | 0.0291051 | -3.17 |
| ILMN_1786186 | NA        | -0.10 | 6.88  | -2.77 | 0.006772  | 0.0291074 | -3.17 |
| ILMN_2135272 | GIMAP2    | 0.13  | 6.83  | 2.77  | 0.0067812 | 0.0291436 | -3.18 |
| ILMN_2154950 | ZNF423    | 0.10  | 6.71  | 2.77  | 0.0067836 | 0.0291502 | -3.18 |
| ILMN_1664511 | NDC80     | 0.12  | 6.96  | 2.77  | 0.0067862 | 0.0291514 | -3.18 |
| ILMN_1694011 | WNT2      | 0.07  | 6.44  | 2.77  | 0.0067856 | 0.0291514 | -3.18 |
| ILMN_1751028 | SERPINH1  | 0.20  | 7.85  | 2.77  | 0.0067864 | 0.0291514 | -3.18 |
| ILMN_1788239 | AMDHD1    | 0.08  | 6.44  | 2.77  | 0.00679   | 0.0291631 | -3.17 |
| ILMN_1658261 | MAPKBP1   | 0.08  | 6.50  | 2.77  | 0.0067945 | 0.0291786 | -3.18 |
| ILMN_2364376 | ILK       | 0.11  | 10.37 | 2.77  | 0.006796  | 0.0291816 | -3.18 |
| ILMN_1742889 | WDR77     | 0.10  | 7.31  | 2.76  | 0.0068091 | 0.029234  | -3.18 |
| ILMN_2296510 | SLC5A12   | -0.07 | 6.53  | -2.76 | 0.0068217 | 0.0292847 | -3.18 |
| ILMN_2341467 | PARL      | -0.15 | 9.09  | -2.76 | 0.0068254 | 0.0292968 | -3.18 |
| ILMN_1812477 | DOC2A     | -0.10 | 6.57  | -2.76 | 0.0068301 | 0.0293136 | -3.18 |
| ILMN_1698007 | ACKR4     | 0.09  | 6.56  | 2.76  | 0.0068442 | 0.0293682 | -3.18 |
| ILMN_1810327 | HNRNPUL2  | -0.08 | 9.10  | -2.76 | 0.0068446 | 0.0293682 | -3.18 |
| ILMN_1678934 | POLR1E    | 0.13  | 6.96  | 2.76  | 0.0068517 | 0.0293913 | -3.18 |
| ILMN_2174875 | CCDC13    | -0.08 | 6.57  | -2.76 | 0.0068511 | 0.0293913 | -3.18 |
| ILMN_1695475 | SEMA3C    | -0.15 | 7.41  | -2.76 | 0.0068551 | 0.0294026 | -3.18 |
| ILMN_2313926 | CDC42SE2  | -0.14 | 8.81  | -2.76 | 0.0068563 | 0.0294037 | -3.19 |
| ILMN_2128428 | DAB2      | 0.19  | 9.38  | 2.76  | 0.0068626 | 0.0294273 | -3.19 |
| ILMN_1759312 | AMPD1     | -0.19 | 6.86  | -2.76 | 0.0068729 | 0.0294677 | -3.19 |
| ILMN_1655876 | TMEM159   | -0.11 | 7.43  | -2.76 | 0.006877  | 0.0294817 | -3.19 |
| ILMN_1696830 | AMPD2     | 0.07  | 6.28  | 2.76  | 0.006878  | 0.0294824 | -3.19 |
| ILMN_1672565 | TRMT10C   | 0.15  | 7.51  | 2.76  | 0.0068838 | 0.0295036 | -3.19 |
| ILMN_1746693 | UBTFL1    | -0.07 | 6.38  | -2.76 | 0.006892  | 0.0295347 | -3.19 |
| ILMN_1765649 | IRF3      | -0.12 | 7.85  | -2.76 | 0.0069044 | 0.0295845 | -3.19 |
| ILMN_2073157 | AMY2B     | -0.09 | 6.86  | -2.76 | 0.0069193 | 0.0296407 | -3.19 |
| ILMN_2223130 | SMARCA5   | 0.12  | 7.68  | 2.76  | 0.0069184 | 0.0296407 | -3.19 |
| ILMN_1782753 | LOC153684 | 0.09  | 6.77  | 2.76  | 0.0069248 | 0.0296609 | -3.19 |
| ILMN_2395285 | SNRNP35   | -0.10 | 7.21  | -2.76 | 0.0069271 | 0.0296668 | -3.19 |
| ILMN_1716407 | SORBS2    | 0.22  | 7.79  | 2.76  | 0.0069296 | 0.0296738 | -3.19 |
| ILMN_1799642 | TRIM24    | -0.10 | 7.38  | -2.76 | 0.0069378 | 0.0297052 | -3.20 |
| ILMN_2186597 | NA        | -0.11 | 10.12 | -2.76 | 0.0069472 | 0.0297419 | -3.20 |
| ILMN_1659215 | CYP4B1    | 0.08  | 6.39  | 2.76  | 0.0069516 | 0.0297571 | -3.20 |
| ILMN_1677532 | TARDBP    | -0.11 | 7.82  | -2.76 | 0.0069621 | 0.0297983 | -3.20 |
| ILMN_1694587 | EEF1B2    | 0.18  | 11.43 | 2.76  | 0.0069672 | 0.0298145 | -3.20 |
| ILMN_1775357 | NA        | 0.10  | 6.65  | 2.76  | 0.0069676 | 0.0298145 | -3.20 |
| ILMN_1723177 | ANAPC5    | -0.11 | 9.62  | -2.76 | 0.0069784 | 0.0298571 | -3.20 |
| ILMN_1695079 | ZNF101    | 0.07  | 6.58  | 2.76  | 0.0069827 | 0.0298717 | -3.20 |
| ILMN_1696806 | NA        | -0.13 | 7.31  | -2.75 | 0.0070085 | 0.0299783 | -3.20 |
| ILMN_2128668 | FOXJ3     | -0.10 | 9.38  | -2.75 | 0.0070097 | 0.0299799 | -3.21 |
| ILMN_1779416 | SCUBE2    | -0.11 | 6.70  | -2.75 | 0.0070139 | 0.0299941 | -3.21 |



|              |           |       |       |       |           |           |       |
|--------------|-----------|-------|-------|-------|-----------|-----------|-------|
| ILMN_2275199 | OPRM1     | -0.06 | 6.43  | -2.75 | 0.0070154 | 0.0299967 | -3.21 |
| ILMN_1695461 | PTPRA     | -0.08 | 6.59  | -2.75 | 0.0070216 | 0.0300195 | -3.21 |
| ILMN_1708081 | LCLAT1    | 0.16  | 8.56  | 2.75  | 0.0070302 | 0.0300523 | -3.21 |
| ILMN_1778425 | DPP10     | -0.09 | 6.49  | -2.75 | 0.0070373 | 0.0300791 | -3.21 |
| ILMN_3307786 | L3MBTL2   | -0.12 | 7.43  | -2.75 | 0.0070444 | 0.0301058 | -3.21 |
| ILMN_1763603 | FAM177A1  | -0.17 | 7.45  | -2.75 | 0.0070534 | 0.0301405 | -3.21 |
| ILMN_3281767 | NA        | -0.06 | 6.37  | -2.75 | 0.0070645 | 0.0301841 | -3.21 |
| ILMN_3175715 | LOC286149 | 0.07  | 6.36  | 2.75  | 0.0070664 | 0.0301884 | -3.21 |
| ILMN_2408730 | GCC2      | -0.10 | 6.86  | -2.75 | 0.0070727 | 0.0302115 | -3.21 |
| ILMN_3257566 | DSTYK     | 0.09  | 7.12  | 2.75  | 0.0070739 | 0.030213  | -3.21 |
| ILMN_1728923 | F2RL2     | 0.08  | 6.56  | 2.75  | 0.0070766 | 0.030221  | -3.21 |
| ILMN_1662263 | NA        | -0.09 | 7.13  | -2.75 | 0.0070847 | 0.0302481 | -3.21 |
| ILMN_1775405 | ARL4A     | -0.21 | 9.15  | -2.75 | 0.0070841 | 0.0302481 | -3.21 |
| ILMN_3239606 | NA        | -0.08 | 6.41  | -2.75 | 0.007109  | 0.0303481 | -3.22 |
| ILMN_1800942 | KCTD6     | 0.10  | 7.22  | 2.75  | 0.0071123 | 0.0303583 | -3.22 |
| ILMN_1896741 | NA        | -0.10 | 6.53  | -2.75 | 0.007115  | 0.0303659 | -3.22 |
| ILMN_1737805 | TPCN1     | -0.08 | 6.61  | -2.75 | 0.0071267 | 0.0304121 | -3.22 |
| ILMN_1683990 | RSG1      | -0.06 | 6.52  | -2.75 | 0.0071311 | 0.0304235 | -3.22 |
| ILMN_3243673 | LINC00111 | -0.08 | 6.38  | -2.75 | 0.0071306 | 0.0304235 | -3.22 |
| ILMN_2259223 | TMTC4     | -0.09 | 6.57  | -2.75 | 0.0071348 | 0.0304355 | -3.22 |
| ILMN_2390472 | TTC14     | -0.11 | 8.12  | -2.75 | 0.0071439 | 0.0304706 | -3.22 |
| ILMN_1671151 | RARB      | 0.07  | 6.41  | 2.75  | 0.0071707 | 0.030581  | -3.23 |
| ILMN_1798533 | ZNF22     | 0.14  | 8.51  | 2.75  | 0.0071729 | 0.0305865 | -3.23 |
| ILMN_1710989 | GOLGA8S   | 0.22  | 6.72  | 2.75  | 0.0071748 | 0.0305907 | -3.23 |
| ILMN_1783985 | COQ6      | -0.10 | 7.70  | -2.75 | 0.0071756 | 0.0305907 | -3.22 |
| ILMN_1661335 | SPTBN1    | -0.18 | 9.87  | -2.75 | 0.0071867 | 0.0306343 | -3.23 |
| ILMN_2326071 | MYL6      | -0.10 | 13.13 | -2.75 | 0.0071899 | 0.030644  | -3.23 |
| ILMN_1705213 | TMBIM1    | -0.23 | 9.35  | -2.75 | 0.0071949 | 0.0306613 | -3.23 |
| ILMN_3237991 | NA        | 0.19  | 7.77  | 2.74  | 0.0072011 | 0.0306841 | -3.23 |
| ILMN_1673682 | GATAD2A   | 0.11  | 9.31  | 2.74  | 0.0072122 | 0.0307275 | -3.23 |
| ILMN_1774949 | PIGP      | 0.15  | 7.09  | 2.74  | 0.0072155 | 0.0307302 | -3.23 |
| ILMN_2047676 | OSGEPL1   | -0.09 | 6.81  | -2.74 | 0.0072146 | 0.0307302 | -3.23 |
| ILMN_3229033 | NA        | 0.11  | 7.59  | 2.74  | 0.0072147 | 0.0307302 | -3.23 |
| ILMN_1799104 | SPAG9     | 0.17  | 7.99  | 2.74  | 0.0072201 | 0.0307459 | -3.23 |
| ILMN_1722450 | NA        | -0.11 | 6.76  | -2.74 | 0.0072244 | 0.0307608 | -3.23 |
| ILMN_2407879 | SORBS2    | 0.20  | 7.73  | 2.74  | 0.007226  | 0.0307637 | -3.23 |
| ILMN_1657204 | SAE1      | 0.10  | 10.55 | 2.74  | 0.0072445 | 0.0308386 | -3.23 |
| ILMN_1714710 | CCDC120   | 0.10  | 7.20  | 2.74  | 0.0072589 | 0.0308921 | -3.24 |
| ILMN_1824898 | NA        | 0.12  | 7.32  | 2.74  | 0.0072584 | 0.0308921 | -3.24 |
| ILMN_2397521 | KDM6B     | 0.10  | 6.68  | 2.74  | 0.0072615 | 0.0308995 | -3.24 |
| ILMN_3203186 | NA        | -0.16 | 7.75  | -2.74 | 0.0072672 | 0.0309197 | -3.24 |
| ILMN_1687319 | SLCO1B3   | 0.15  | 6.43  | 2.74  | 0.007269  | 0.0309237 | -3.24 |
| ILMN_2374383 | TSPAN17   | -0.10 | 7.27  | -2.74 | 0.0072703 | 0.0309255 | -3.24 |
| ILMN_1721415 | CDYL      | -0.06 | 6.27  | -2.74 | 0.0072725 | 0.030931  | -3.24 |
| ILMN_1792415 | POMGNT2   | 0.09  | 6.81  | 2.74  | 0.007278  | 0.0309505 | -3.24 |
| ILMN_1808591 | UBE2S     | 0.16  | 7.87  | 2.74  | 0.0072863 | 0.0309821 | -3.24 |
| ILMN_2233513 | LRRIQ4    | 0.10  | 6.47  | 2.74  | 0.0072908 | 0.0309975 | -3.24 |
| ILMN_1798582 | GRB7      | -0.06 | 6.31  | -2.74 | 0.0072978 | 0.0310233 | -3.24 |

|              |          |       |       |       |           |           |       |
|--------------|----------|-------|-------|-------|-----------|-----------|-------|
| ILMN_3249366 | JMJD8    | 0.11  | 9.31  | 2.74  | 0.0073042 | 0.0310467 | -3.24 |
| ILMN_1762046 | ZNF551   | -0.07 | 6.50  | -2.74 | 0.0073062 | 0.0310512 | -3.24 |
| ILMN_1665132 | CD36     | -0.09 | 6.40  | -2.74 | 0.007317  | 0.031087  | -3.24 |
| ILMN_1701220 | PIWIL1   | 0.09  | 6.42  | 2.74  | 0.0073162 | 0.031087  | -3.24 |
| ILMN_3248874 | SNORD8   | -0.06 | 6.49  | -2.74 | 0.0073173 | 0.031087  | -3.24 |
| ILMN_1682098 | PSMA4    | 0.13  | 9.26  | 2.74  | 0.0073277 | 0.0311274 | -3.25 |
| ILMN_2283398 | DUSP4    | 0.08  | 6.43  | 2.74  | 0.0073367 | 0.0311616 | -3.25 |
| ILMN_1718268 | GJB4     | 0.14  | 6.59  | 2.74  | 0.0073398 | 0.0311712 | -3.24 |
| ILMN_2056002 | ANP32AP1 | -0.15 | 7.14  | -2.74 | 0.0073416 | 0.0311748 | -3.24 |
| ILMN_2343264 | PRDM16   | 0.09  | 6.45  | 2.74  | 0.0073469 | 0.0311938 | -3.25 |
| ILMN_1769319 | CNBP     | 0.15  | 10.08 | 2.74  | 0.0073579 | 0.0312365 | -3.25 |
| ILMN_1700238 | ZNF500   | -0.10 | 7.22  | -2.74 | 0.0073708 | 0.0312873 | -3.25 |
| ILMN_1728055 | ASTL     | -0.08 | 6.48  | -2.74 | 0.0073719 | 0.0312883 | -3.25 |
| ILMN_2062687 | FARP2    | -0.08 | 6.91  | -2.74 | 0.0073755 | 0.0312997 | -3.25 |
| ILMN_2173740 | ASB8     | -0.14 | 8.14  | -2.74 | 0.0074032 | 0.0314103 | -3.25 |
| ILMN_3243606 | SAMD15   | -0.08 | 7.13  | -2.74 | 0.0074034 | 0.0314103 | -3.25 |
| ILMN_1888359 | BMPR1B   | 0.12  | 6.60  | 2.73  | 0.0074063 | 0.0314185 | -3.25 |
| ILMN_1716056 | LMF2     | 0.13  | 7.80  | 2.73  | 0.0074076 | 0.0314203 | -3.25 |
| ILMN_1821887 | NA       | 0.16  | 7.62  | 2.73  | 0.0074125 | 0.0314372 | -3.26 |
| ILMN_1789599 | NA       | -0.18 | 10.71 | -2.73 | 0.0074135 | 0.0314377 | -3.26 |
| ILMN_1682494 | RSRC1    | 0.11  | 7.01  | 2.73  | 0.0074162 | 0.031445  | -3.26 |
| ILMN_2194649 | TADA1    | -0.08 | 7.47  | -2.73 | 0.0074212 | 0.0314588 | -3.26 |
| ILMN_2307032 | OSBPL5   | 0.14  | 7.72  | 2.73  | 0.0074207 | 0.0314588 | -3.26 |
| ILMN_1698752 | NLRX1    | -0.09 | 6.71  | -2.73 | 0.0074311 | 0.0314941 | -3.26 |
| ILMN_1705562 | MTCL1    | 0.09  | 6.49  | 2.73  | 0.007432  | 0.0314941 | -3.25 |
| ILMN_3241670 | ARIH2OS  | -0.07 | 6.47  | -2.73 | 0.0074323 | 0.0314941 | -3.26 |
| ILMN_1683416 | MUC6     | -0.07 | 6.44  | -2.73 | 0.0074485 | 0.0315587 | -3.26 |
| ILMN_1716524 | RAB7A    | -0.09 | 10.74 | -2.73 | 0.0074603 | 0.0316051 | -3.26 |
| ILMN_1651428 | SYTL2    | -0.13 | 6.92  | -2.73 | 0.0074657 | 0.0316229 | -3.26 |
| ILMN_1684574 | NA       | -0.07 | 6.39  | -2.73 | 0.0074664 | 0.0316229 | -3.26 |
| ILMN_1775016 | MPZL2    | -0.14 | 7.34  | -2.73 | 0.0074676 | 0.0316241 | -3.26 |
| ILMN_1872605 | NA       | 0.07  | 6.41  | 2.73  | 0.007474  | 0.0316473 | -3.26 |
| ILMN_1718023 | APEH     | -0.14 | 9.39  | -2.73 | 0.0074774 | 0.0316581 | -3.26 |
| ILMN_1665060 | CCDC121  | -0.09 | 6.66  | -2.73 | 0.0074871 | 0.0316946 | -3.26 |
| ILMN_1784822 | PPP1R3F  | 0.07  | 6.52  | 2.73  | 0.0074879 | 0.0316946 | -3.26 |
| ILMN_1812062 | SGPP2    | -0.10 | 6.86  | -2.73 | 0.0075111 | 0.031789  | -3.27 |
| ILMN_1702443 | DNMBP    | -0.07 | 6.62  | -2.73 | 0.0075252 | 0.0318446 | -3.26 |
| ILMN_1695135 | GCM1     | -0.08 | 6.63  | -2.73 | 0.0075325 | 0.0318683 | -3.27 |
| ILMN_3193623 | NA       | 0.23  | 8.71  | 2.73  | 0.0075326 | 0.0318683 | -3.27 |
| ILMN_1668465 | TLDC1    | -0.08 | 6.45  | -2.73 | 0.007535  | 0.0318745 | -3.27 |
| ILMN_1767722 | AFTPH    | -0.10 | 7.00  | -2.73 | 0.0075365 | 0.0318769 | -3.27 |
| ILMN_1661800 | NA       | -0.10 | 6.50  | -2.73 | 0.0075461 | 0.0319137 | -3.27 |
| ILMN_1663002 | STOML2   | -0.09 | 9.75  | -2.73 | 0.0075566 | 0.0319542 | -3.27 |
| ILMN_1803278 | PGM5     | 0.09  | 6.45  | 2.73  | 0.0075692 | 0.0320009 | -3.27 |
| ILMN_1871457 | NA       | 0.10  | 6.82  | 2.73  | 0.0075695 | 0.0320009 | -3.27 |
| ILMN_1726308 | ST13P4   | 0.13  | 8.46  | 2.73  | 0.0075706 | 0.0320015 | -3.27 |
| ILMN_1660021 | PLIN3    | 0.17  | 10.62 | 2.73  | 0.0075736 | 0.0320104 | -3.27 |
| ILMN_1793203 | MIEF1    | -0.12 | 7.99  | -2.73 | 0.0075749 | 0.032012  | -3.27 |

|              |          |       |       |       |           |           |       |
|--------------|----------|-------|-------|-------|-----------|-----------|-------|
| ILMN_1654065 | ATOH8    | 0.09  | 6.65  | 2.73  | 0.0075841 | 0.0320469 | -3.28 |
| ILMN_1675365 | LARP4    | -0.09 | 6.85  | -2.73 | 0.0075872 | 0.032056  | -3.28 |
| ILMN_1343291 | EEF1A1   | 0.10  | 14.00 | 2.73  | 0.0075913 | 0.0320645 | -3.28 |
| ILMN_1680341 | PPIE     | -0.11 | 7.44  | -2.73 | 0.007592  | 0.0320645 | -3.27 |
| ILMN_3239162 | SNORA31  | 0.07  | 6.44  | 2.73  | 0.0075905 | 0.0320645 | -3.28 |
| ILMN_1752455 | DOCK5    | -0.11 | 6.96  | -2.73 | 0.0076036 | 0.0321093 | -3.28 |
| ILMN_3248627 | CHRM3    | 0.10  | 6.56  | 2.73  | 0.0076061 | 0.0321159 | -3.28 |
| ILMN_2160476 | CCL22    | 0.16  | 6.63  | 2.72  | 0.0076323 | 0.0322229 | -3.28 |
| ILMN_3239426 | GPN3     | 0.13  | 7.43  | 2.72  | 0.0076609 | 0.0323398 | -3.29 |
| ILMN_1730307 | MED16    | -0.10 | 7.14  | -2.72 | 0.0076623 | 0.0323417 | -3.28 |
| ILMN_1745513 | MCAT     | -0.10 | 6.86  | -2.72 | 0.007669  | 0.0323656 | -3.29 |
| ILMN_1670554 | WDR78    | -0.07 | 6.41  | -2.72 | 0.0076722 | 0.0323755 | -3.28 |
| ILMN_1738783 | GDF9     | -0.08 | 6.50  | -2.72 | 0.0076879 | 0.0324375 | -3.29 |
| ILMN_1691539 | LAT      | 0.10  | 6.82  | 2.72  | 0.0076965 | 0.0324661 | -3.29 |
| ILMN_1769580 | PRSS35   | 0.10  | 6.55  | 2.72  | 0.0076965 | 0.0324661 | -3.29 |
| ILMN_1790533 | PHACTR2  | -0.11 | 8.30  | -2.72 | 0.0077005 | 0.0324789 | -3.29 |
| ILMN_2412761 | MAFG     | 0.09  | 6.72  | 2.72  | 0.0077024 | 0.032483  | -3.29 |
| ILMN_1767070 | VN1R5    | -0.07 | 6.49  | -2.72 | 0.0077193 | 0.03255   | -3.29 |
| ILMN_2290007 | NELFB    | -0.06 | 6.73  | -2.72 | 0.0077281 | 0.0325831 | -3.29 |
| ILMN_2098446 | PMAIP1   | 0.11  | 6.65  | 2.72  | 0.0077316 | 0.0325941 | -3.29 |
| ILMN_2136133 | PABPC1   | 0.18  | 9.48  | 2.72  | 0.0077334 | 0.0325977 | -3.29 |
| ILMN_2376553 | SLC23A1  | -0.08 | 6.56  | -2.72 | 0.0077403 | 0.0326228 | -3.29 |
| ILMN_3235780 | NA       | 0.06  | 6.46  | 2.72  | 0.0077443 | 0.0326356 | -3.29 |
| ILMN_1655827 | COPS2    | 0.11  | 6.93  | 2.72  | 0.0077465 | 0.0326409 | -3.30 |
| ILMN_1754658 | NA       | 0.09  | 6.56  | 2.72  | 0.0077793 | 0.032766  | -3.30 |
| ILMN_1768311 | NA       | -0.17 | 11.40 | -2.72 | 0.00778   | 0.032766  | -3.30 |
| ILMN_2050654 | SAV1     | 0.10  | 6.75  | 2.72  | 0.00778   | 0.032766  | -3.30 |
| ILMN_2175894 | HNRNPR   | 0.13  | 9.97  | 2.72  | 0.0077792 | 0.032766  | -3.30 |
| ILMN_2128162 | SIPA1L1  | -0.08 | 6.67  | -2.72 | 0.0077831 | 0.0327751 | -3.30 |
| ILMN_1796069 | CBLN2    | -0.10 | 6.57  | -2.72 | 0.0077927 | 0.0328105 | -3.30 |
| ILMN_1819384 | VTRNA1-3 | 0.11  | 6.60  | 2.72  | 0.0077934 | 0.0328105 | -3.30 |
| ILMN_2064917 | AGGF1    | -0.11 | 8.25  | -2.72 | 0.007821  | 0.0329226 | -3.30 |
| ILMN_2055165 | MRFAP1   | 0.14  | 9.63  | 2.72  | 0.0078223 | 0.0329241 | -3.30 |
| ILMN_1808811 | SBNO2    | 0.14  | 7.09  | 2.72  | 0.007824  | 0.0329274 | -3.30 |
| ILMN_2334760 | ARMCX3   | 0.16  | 8.12  | 2.72  | 0.0078316 | 0.0329553 | -3.30 |
| ILMN_1686083 | MAGEA11  | -0.08 | 6.39  | -2.71 | 0.0078377 | 0.0329767 | -3.31 |
| ILMN_1738989 | SYBU     | -0.16 | 8.03  | -2.71 | 0.0078403 | 0.0329798 | -3.31 |
| ILMN_2173919 | MYO9A    | -0.10 | 7.59  | -2.71 | 0.0078403 | 0.0329798 | -3.31 |
| ILMN_1724826 | DNM1L    | 0.09  | 7.02  | 2.71  | 0.00786   | 0.0330588 | -3.31 |
| ILMN_1671600 | EPS8L1   | 0.13  | 7.10  | 2.71  | 0.0078695 | 0.0330907 | -3.31 |
| ILMN_2410713 | FGFR4    | -0.13 | 7.10  | -2.71 | 0.0078692 | 0.0330907 | -3.31 |
| ILMN_1813260 | TIMM17B  | -0.10 | 7.37  | -2.71 | 0.0078713 | 0.0330941 | -3.31 |
| ILMN_1656904 | SLC1A4   | 0.09  | 6.77  | 2.71  | 0.0078746 | 0.0331037 | -3.31 |
| ILMN_2311041 | MRPL52   | -0.10 | 7.21  | -2.71 | 0.0078776 | 0.0331124 | -3.31 |
| ILMN_2350801 | SLC25A29 | 0.08  | 6.71  | 2.71  | 0.0078821 | 0.0331273 | -3.31 |
| ILMN_2380967 | DNASE1L1 | 0.11  | 7.67  | 2.71  | 0.0078849 | 0.0331351 | -3.31 |
| ILMN_1682037 | FBXL8    | -0.07 | 6.51  | -2.71 | 0.0078869 | 0.0331354 | -3.31 |
| ILMN_1743340 | CHST14   | 0.08  | 6.67  | 2.71  | 0.0078861 | 0.0331354 | -3.31 |

|              |          |       |       |       |           |           |       |
|--------------|----------|-------|-------|-------|-----------|-----------|-------|
| ILMN_1711823 | FAAP100  | -0.14 | 8.59  | -2.71 | 0.007891  | 0.0331447 | -3.31 |
| ILMN_1753584 | KRT8     | -0.28 | 11.24 | -2.71 | 0.0078902 | 0.0331447 | -3.31 |
| ILMN_1815519 | EPN2     | 0.10  | 7.23  | 2.71  | 0.0078983 | 0.0331712 | -3.31 |
| ILMN_3194432 | SPTB     | -0.08 | 6.43  | -2.71 | 0.0079004 | 0.033176  | -3.31 |
| ILMN_1662658 | PUS1     | 0.14  | 8.49  | 2.71  | 0.0079022 | 0.0331795 | -3.31 |
| ILMN_1657606 | ZFHX4    | 0.08  | 6.29  | 2.71  | 0.0079073 | 0.0331969 | -3.31 |
| ILMN_1685062 | REG3G    | 0.08  | 6.29  | 2.71  | 0.0079141 | 0.0332213 | -3.31 |
| ILMN_1668876 | HECTD2   | 0.09  | 6.58  | 2.71  | 0.0079151 | 0.0332215 | -3.31 |
| ILMN_1748730 | CTRC     | 0.08  | 6.52  | 2.71  | 0.00792   | 0.0332379 | -3.31 |
| ILMN_2207726 | FAM46D   | -0.08 | 6.53  | -2.71 | 0.0079238 | 0.0332498 | -3.31 |
| ILMN_2314169 | PTHLH    | 0.06  | 6.52  | 2.71  | 0.0079308 | 0.033275  | -3.32 |
| ILMN_1715635 | ATP6V0E1 | -0.12 | 10.18 | -2.71 | 0.0079418 | 0.0333172 | -3.32 |
| ILMN_1779706 | TP53BP2  | 0.12  | 7.63  | 2.71  | 0.007972  | 0.0334398 | -3.32 |
| ILMN_1733841 | TCF7L1   | 0.07  | 6.42  | 2.71  | 0.0079803 | 0.0334708 | -3.32 |
| ILMN_1724148 | ORAI1    | 0.08  | 6.68  | 2.71  | 0.0079939 | 0.0335238 | -3.32 |
| ILMN_1696189 | KCNAB1   | 0.06  | 6.50  | 2.71  | 0.0079986 | 0.0335391 | -3.32 |
| ILMN_1794501 | HAS3     | 0.33  | 7.23  | 2.71  | 0.0080055 | 0.0335642 | -3.32 |
| ILMN_2167011 | ECHDC1   | -0.16 | 7.51  | -2.71 | 0.0080069 | 0.0335657 | -3.32 |
| ILMN_1694757 | CTSL     | 0.11  | 6.70  | 2.71  | 0.0080097 | 0.0335736 | -3.33 |
| ILMN_1676280 | NSUN3    | -0.10 | 7.06  | -2.71 | 0.0080108 | 0.0335741 | -3.33 |
| ILMN_1797933 | MRPL17   | 0.13  | 8.90  | 2.71  | 0.0080179 | 0.0335955 | -3.33 |
| ILMN_1810055 | FAM234A  | -0.15 | 8.52  | -2.71 | 0.0080178 | 0.0335955 | -3.33 |
| ILMN_2336982 | NPTN     | -0.11 | 10.95 | -2.71 | 0.0080243 | 0.0336183 | -3.33 |
| ILMN_2113074 | UFM1     | 0.12  | 7.57  | 2.71  | 0.0080316 | 0.0336448 | -3.33 |
| ILMN_2135321 | CHDH     | -0.09 | 6.57  | -2.71 | 0.0080354 | 0.0336566 | -3.33 |
| ILMN_1783835 | NA       | -0.07 | 6.53  | -2.71 | 0.00805   | 0.0337137 | -3.32 |
| ILMN_1693233 | KIAA0513 | -0.13 | 7.46  | -2.71 | 0.008051  | 0.0337138 | -3.33 |
| ILMN_1726981 | VEGFB    | 0.19  | 9.77  | 2.70  | 0.0080571 | 0.0337355 | -3.33 |
| ILMN_1731928 | LY9      | 0.15  | 6.70  | 2.70  | 0.0080767 | 0.0338132 | -3.33 |
| ILMN_1692473 | PRMT1    | 0.16  | 8.68  | 2.70  | 0.008095  | 0.033886  | -3.33 |
| ILMN_1706779 | LIG1     | -0.12 | 7.25  | -2.70 | 0.0081099 | 0.0339441 | -3.34 |
| ILMN_1712027 | RSBN1L   | -0.09 | 7.54  | -2.70 | 0.0081334 | 0.0340377 | -3.34 |
| ILMN_1727300 | ZNF444   | -0.10 | 7.13  | -2.70 | 0.0081343 | 0.0340377 | -3.34 |
| ILMN_2374778 | DUT      | -0.11 | 7.24  | -2.70 | 0.0081389 | 0.0340531 | -3.33 |
| ILMN_1757370 | SMPD1    | -0.15 | 7.01  | -2.70 | 0.0081402 | 0.0340541 | -3.34 |
| ILMN_3241979 | TMEM179B | -0.10 | 8.55  | -2.70 | 0.0081422 | 0.0340585 | -3.34 |
| ILMN_2202790 | MCFD2    | 0.07  | 6.42  | 2.70  | 0.0081455 | 0.0340641 | -3.34 |
| ILMN_2404063 | APP      | -0.23 | 9.60  | -2.70 | 0.0081453 | 0.0340641 | -3.34 |
| ILMN_1740587 | RPS11    | 0.11  | 13.23 | 2.70  | 0.0081487 | 0.0340701 | -3.34 |
| ILMN_1804812 | ANAPC1   | 0.15  | 8.06  | 2.70  | 0.0081489 | 0.0340701 | -3.34 |
| ILMN_2333440 | TM9SF1   | -0.07 | 6.80  | -2.70 | 0.0081516 | 0.0340773 | -3.34 |
| ILMN_1794780 | SHARPIN  | -0.11 | 6.95  | -2.70 | 0.0081579 | 0.0340992 | -3.34 |
| ILMN_1719343 | WDR26    | 0.12  | 8.23  | 2.70  | 0.0081723 | 0.0341553 | -3.34 |
| ILMN_1794505 | SHFM1    | 0.10  | 7.32  | 2.70  | 0.0081747 | 0.0341614 | -3.34 |
| ILMN_1791656 | EDRF1    | -0.09 | 7.79  | -2.70 | 0.0081835 | 0.0341939 | -3.34 |
| ILMN_1669598 | KMT5B    | -0.13 | 7.42  | -2.70 | 0.0081916 | 0.0342236 | -3.35 |
| ILMN_1699610 | CCT6B    | 0.09  | 6.93  | 2.70  | 0.0082143 | 0.0343142 | -3.35 |
| ILMN_2331266 | NUMB     | -0.09 | 10.09 | -2.70 | 0.0082175 | 0.0343234 | -3.35 |

|              |           |       |       |       |           |           |       |
|--------------|-----------|-------|-------|-------|-----------|-----------|-------|
| ILMN_1810780 | NA        | -0.08 | 6.47  | -2.70 | 0.0082214 | 0.0343358 | -3.35 |
| ILMN_1804090 | SLC25A10  | -0.19 | 7.51  | -2.70 | 0.0082239 | 0.0343419 | -3.35 |
| ILMN_1783621 | CMPK2     | -0.08 | 6.53  | -2.70 | 0.008241  | 0.0344091 | -3.35 |
| ILMN_1672720 | PRSS12    | -0.10 | 6.95  | -2.70 | 0.0082571 | 0.0344721 | -3.35 |
| ILMN_1795007 | C2orf47   | -0.12 | 8.67  | -2.70 | 0.0082611 | 0.0344848 | -3.35 |
| ILMN_3200830 | CCT6P3    | 0.14  | 9.62  | 2.70  | 0.008264  | 0.0344926 | -3.35 |
| ILMN_2166534 | STK17B    | 0.07  | 6.34  | 2.70  | 0.0082826 | 0.034566  | -3.36 |
| ILMN_1666933 | ASH2L     | -0.11 | 8.69  | -2.69 | 0.0082876 | 0.0345829 | -3.36 |
| ILMN_1755487 | TTC28     | 0.08  | 6.54  | 2.69  | 0.0082938 | 0.0346046 | -3.36 |
| ILMN_1705871 | DDHD2     | 0.10  | 7.79  | 2.69  | 0.0083037 | 0.0346417 | -3.36 |
| ILMN_1792571 | ARHGEF15  | 0.06  | 6.36  | 2.69  | 0.0083067 | 0.0346498 | -3.36 |
| ILMN_3248961 | MAPK1IP1L | -0.09 | 6.64  | -2.69 | 0.008308  | 0.0346512 | -3.36 |
| ILMN_1700923 | ATG4C     | 0.12  | 7.37  | 2.69  | 0.0083135 | 0.0346699 | -3.36 |
| ILMN_1751345 | AP1S1     | -0.18 | 7.84  | -2.69 | 0.0083339 | 0.0347507 | -3.36 |
| ILMN_3178252 | RPS29     | 0.19  | 11.92 | 2.69  | 0.0083562 | 0.0348397 | -3.36 |
| ILMN_1669931 | TM9SF3    | -0.11 | 9.68  | -2.69 | 0.0083673 | 0.0348815 | -3.36 |
| ILMN_3239217 | TOMM40    | -0.07 | 6.55  | -2.69 | 0.0083688 | 0.0348837 | -3.36 |
| ILMN_2050790 | NA        | -0.08 | 6.64  | -2.69 | 0.0083866 | 0.0349537 | -3.36 |
| ILMN_1716370 | TNS4      | 0.06  | 6.40  | 2.69  | 0.0083968 | 0.0349917 | -3.37 |
| ILMN_1744534 | LYRM5     | 0.10  | 8.45  | 2.69  | 0.0083978 | 0.0349917 | -3.37 |
| ILMN_3309534 | MIR25     | -0.09 | 6.59  | -2.69 | 0.0084156 | 0.0350618 | -3.37 |
| ILMN_2096322 | ADIPOR1   | 0.10  | 7.73  | 2.69  | 0.0084187 | 0.0350704 | -3.37 |
| ILMN_3310326 | MIR221    | 0.18  | 6.77  | 2.69  | 0.0084228 | 0.0350835 | -3.37 |
| ILMN_1652736 | RPS6KA3   | -0.18 | 7.96  | -2.69 | 0.0084297 | 0.035108  | -3.37 |
| ILMN_1670561 | TCEAL8    | -0.11 | 7.25  | -2.69 | 0.0084322 | 0.0351138 | -3.37 |
| ILMN_1699440 | ZBTB47    | 0.08  | 6.55  | 2.69  | 0.008438  | 0.0351337 | -3.37 |
| ILMN_1753139 | ZG16B     | -0.25 | 7.71  | -2.69 | 0.0084402 | 0.0351388 | -3.37 |
| ILMN_1748923 | SMC2      | 0.10  | 6.90  | 2.69  | 0.008442  | 0.0351419 | -3.37 |
| ILMN_2399769 | WLS       | -0.14 | 8.18  | -2.69 | 0.0084631 | 0.0352257 | -3.37 |
| ILMN_1779015 | ZNF467    | 0.11  | 7.00  | 2.69  | 0.0084714 | 0.0352558 | -3.38 |
| ILMN_1668507 | DDAH1     | -0.15 | 9.56  | -2.69 | 0.0084807 | 0.0352869 | -3.38 |
| ILMN_2169856 | C12orf43  | 0.09  | 6.73  | 2.69  | 0.0084809 | 0.0352869 | -3.38 |
| ILMN_1679721 | CYB561    | -0.07 | 6.66  | -2.69 | 0.0084841 | 0.0352961 | -3.38 |
| ILMN_1706273 | MOB2      | -0.09 | 7.36  | -2.69 | 0.0085012 | 0.035363  | -3.38 |
| ILMN_1670504 | NA        | -0.06 | 6.44  | -2.68 | 0.0085288 | 0.0354733 | -3.38 |
| ILMN_3225941 | NA        | 0.09  | 12.70 | 2.68  | 0.0085386 | 0.03551   | -3.38 |
| ILMN_1684549 | RBM39     | -0.08 | 6.59  | -2.68 | 0.0085416 | 0.035518  | -3.38 |
| ILMN_1735180 | NCSTN     | -0.09 | 9.89  | -2.68 | 0.0085653 | 0.0356123 | -3.39 |
| ILMN_1660658 | MUC12     | -0.17 | 6.94  | -2.68 | 0.0085766 | 0.0356551 | -3.39 |
| ILMN_1716895 | RPA3      | 0.15  | 9.55  | 2.68  | 0.0085796 | 0.0356631 | -3.38 |
| ILMN_3243248 | SNORD87   | 0.07  | 6.60  | 2.68  | 0.0085917 | 0.0357093 | -3.39 |
| ILMN_1823112 | NA        | -0.08 | 6.72  | -2.68 | 0.0086227 | 0.0358339 | -3.39 |
| ILMN_1702384 | ZNF706    | -0.12 | 7.75  | -2.68 | 0.0086329 | 0.0358719 | -3.39 |
| ILMN_1765923 | OGFOD3    | -0.10 | 6.83  | -2.68 | 0.0086471 | 0.0359265 | -3.39 |
| ILMN_3213640 | NA        | 0.08  | 6.73  | 2.68  | 0.0086541 | 0.0359513 | -3.39 |
| ILMN_1655405 | SCARF2    | 0.09  | 6.62  | 2.68  | 0.0086648 | 0.0359914 | -3.40 |
| ILMN_1701434 | RAP1B     | 0.14  | 7.45  | 2.68  | 0.0086824 | 0.0360601 | -3.40 |
| ILMN_3239055 | TMEM208   | 0.11  | 7.53  | 2.68  | 0.0086869 | 0.0360746 | -3.40 |

|              |           |       |       |       |           |           |       |
|--------------|-----------|-------|-------|-------|-----------|-----------|-------|
| ILMN_2347805 | EXOC1     | -0.12 | 8.24  | -2.68 | 0.0086925 | 0.0360935 | -3.40 |
| ILMN_1780618 | TMEM192   | -0.10 | 6.82  | -2.68 | 0.0086936 | 0.0360937 | -3.40 |
| ILMN_1779333 | MSRB3     | 0.09  | 6.39  | 2.68  | 0.0086979 | 0.0360982 | -3.40 |
| ILMN_1794349 | XYLB      | -0.09 | 6.80  | -2.68 | 0.0086977 | 0.0360982 | -3.40 |
| ILMN_2389013 | ADRM1     | 0.10  | 7.59  | 2.68  | 0.0086965 | 0.0360982 | -3.40 |
| ILMN_1672057 | NA        | -0.11 | 6.67  | -2.68 | 0.0087    | 0.0361029 | -3.40 |
| ILMN_1674151 | NA        | -0.10 | 6.90  | -2.68 | 0.0087137 | 0.0361553 | -3.40 |
| ILMN_1687419 | DHX8      | 0.07  | 6.76  | 2.68  | 0.0087151 | 0.0361565 | -3.40 |
| ILMN_1796926 | PABPC5    | -0.10 | 7.45  | -2.68 | 0.0087218 | 0.0361803 | -3.40 |
| ILMN_1672022 | EPHA4     | -0.13 | 7.15  | -2.68 | 0.0087255 | 0.0361865 | -3.40 |
| ILMN_1735052 | ULK1      | 0.14  | 8.60  | 2.68  | 0.0087253 | 0.0361865 | -3.40 |
| ILMN_2377459 | CYTH2     | -0.12 | 7.15  | -2.68 | 0.0087295 | 0.0361991 | -3.40 |
| ILMN_1654566 | HSPA1L    | 0.08  | 6.64  | 2.68  | 0.0087332 | 0.03621   | -3.40 |
| ILMN_1755664 | RPS26     | -0.06 | 6.50  | -2.68 | 0.0087439 | 0.0362501 | -3.40 |
| ILMN_1749612 | IMMP1L    | -0.09 | 7.41  | -2.68 | 0.0087474 | 0.0362601 | -3.40 |
| ILMN_1691501 | LINC00597 | -0.10 | 6.73  | -2.68 | 0.0087494 | 0.0362642 | -3.40 |
| ILMN_1733324 | ITGB3     | 0.07  | 6.47  | 2.68  | 0.0087564 | 0.0362887 | -3.41 |
| ILMN_1700685 | S100BPB   | 0.07  | 6.72  | 2.67  | 0.0087642 | 0.0363166 | -3.41 |
| ILMN_1862963 | LINC01128 | -0.09 | 6.67  | -2.67 | 0.0087701 | 0.0363365 | -3.41 |
| ILMN_2405190 | VAPA      | 0.09  | 6.44  | 2.67  | 0.0088152 | 0.0365192 | -3.41 |
| ILMN_1739805 | NDE1      | 0.16  | 8.26  | 2.67  | 0.0088299 | 0.0365759 | -3.41 |
| ILMN_1693148 | ACAN      | 0.07  | 6.27  | 2.67  | 0.0088358 | 0.0365957 | -3.41 |
| ILMN_1755792 | STK38L    | -0.12 | 7.02  | -2.67 | 0.0088392 | 0.0366054 | -3.41 |
| ILMN_1664577 | DLD       | -0.14 | 8.76  | -2.67 | 0.0088593 | 0.0366761 | -3.42 |
| ILMN_1712678 | RPS27L    | 0.09  | 11.56 | 2.67  | 0.0088595 | 0.0366761 | -3.42 |
| ILMN_1803560 | LAT2      | 0.20  | 7.09  | 2.67  | 0.008858  | 0.0366761 | -3.42 |
| ILMN_3258190 | NA        | 0.07  | 6.34  | 2.67  | 0.0088657 | 0.0366975 | -3.42 |
| ILMN_2340131 | MAPK10    | 0.06  | 6.33  | 2.67  | 0.0088801 | 0.0367528 | -3.42 |
| ILMN_2371119 | EPHA6     | -0.06 | 6.27  | -2.67 | 0.0088826 | 0.0367588 | -3.42 |
| ILMN_1736539 | ALDH1L2   | 0.10  | 6.75  | 2.67  | 0.0088875 | 0.0367745 | -3.42 |
| ILMN_1714418 | FAM101B   | 0.07  | 6.57  | 2.67  | 0.0088947 | 0.0367998 | -3.42 |
| ILMN_1658143 | RFC3      | 0.09  | 6.55  | 2.67  | 0.0088967 | 0.0368037 | -3.42 |
| ILMN_1730658 | YTHDF2    | 0.10  | 8.89  | 2.67  | 0.0089015 | 0.0368192 | -3.42 |
| ILMN_2110084 | ZNF124    | -0.08 | 6.56  | -2.67 | 0.0089115 | 0.0368519 | -3.42 |
| ILMN_2157219 | AASS      | 0.08  | 6.59  | 2.67  | 0.0089109 | 0.0368519 | -3.42 |
| ILMN_1754988 | N6AMT1    | -0.07 | 6.73  | -2.67 | 0.008932  | 0.0369319 | -3.42 |
| ILMN_1810810 | EEF1A1    | 0.12  | 13.81 | 2.67  | 0.008941  | 0.036965  | -3.42 |
| ILMN_3241257 | POLR3E    | 0.15  | 7.77  | 2.67  | 0.0089469 | 0.0369849 | -3.42 |
| ILMN_2394027 | CLK3      | -0.08 | 6.75  | -2.67 | 0.0089525 | 0.0370037 | -3.42 |
| ILMN_1898223 | NA        | -0.07 | 6.54  | -2.67 | 0.0089588 | 0.0370251 | -3.43 |
| ILMN_1753457 | PKP3      | -0.11 | 6.79  | -2.67 | 0.0089676 | 0.037057  | -3.43 |
| ILMN_2350607 | NDUF5     | -0.10 | 7.61  | -2.67 | 0.0089699 | 0.037062  | -3.43 |
| ILMN_1677953 | OGFOD1    | 0.11  | 7.88  | 2.67  | 0.0089731 | 0.0370693 | -3.43 |
| ILMN_1693218 | ART3      | 0.12  | 6.58  | 2.67  | 0.0089742 | 0.0370693 | -3.43 |
| ILMN_2340217 | PTPRC     | 0.12  | 6.61  | 2.67  | 0.0089749 | 0.0370693 | -3.43 |
| ILMN_1797406 | PSMB11    | -0.16 | 6.81  | -2.67 | 0.0089769 | 0.0370732 | -3.43 |
| ILMN_1738751 | LOC728175 | -0.09 | 6.62  | -2.67 | 0.0089942 | 0.0371401 | -3.42 |
| ILMN_1700413 | MAFF      | 0.11  | 6.51  | 2.67  | 0.0089967 | 0.0371462 | -3.43 |

|              |           |       |       |       |           |           |       |
|--------------|-----------|-------|-------|-------|-----------|-----------|-------|
| ILMN_1730685 | MRPL16    | -0.11 | 8.77  | -2.66 | 0.0090112 | 0.0372015 | -3.43 |
| ILMN_1714067 | NTRK2     | -0.23 | 6.86  | -2.66 | 0.0090206 | 0.037236  | -3.43 |
| ILMN_1728331 | ACPT      | -0.07 | 6.59  | -2.66 | 0.009022  | 0.037237  | -3.43 |
| ILMN_1726459 | NPAS4     | 0.07  | 6.49  | 2.66  | 0.0090299 | 0.0372654 | -3.43 |
| ILMN_1813796 | TMEM169   | 0.08  | 6.49  | 2.66  | 0.0090318 | 0.0372687 | -3.43 |
| ILMN_1716053 | AK2       | -0.12 | 9.66  | -2.66 | 0.009035  | 0.0372776 | -3.43 |
| ILMN_1723414 | HACL1     | 0.12  | 8.28  | 2.66  | 0.0090545 | 0.0373536 | -3.44 |
| ILMN_3242176 | UBR3      | 0.09  | 7.46  | 2.66  | 0.0090562 | 0.0373559 | -3.44 |
| ILMN_1696003 | GNAI3     | 0.12  | 7.26  | 2.66  | 0.0090621 | 0.0373746 | -3.44 |
| ILMN_1758719 | NEDD9     | -0.10 | 7.53  | -2.66 | 0.0090629 | 0.0373746 | -3.44 |
| ILMN_1651438 | ZFPM1     | -0.10 | 7.30  | -2.66 | 0.009068  | 0.0373868 | -3.43 |
| ILMN_1710758 | RNF20     | -0.11 | 8.31  | -2.66 | 0.0090679 | 0.0373868 | -3.44 |
| ILMN_1688725 | UTP14A    | 0.11  | 7.16  | 2.66  | 0.0090727 | 0.0374017 | -3.44 |
| ILMN_1679405 | DDX56     | -0.13 | 8.21  | -2.66 | 0.0090807 | 0.0374304 | -3.43 |
| ILMN_2267488 | ITGA6     | 0.07  | 6.48  | 2.66  | 0.0090938 | 0.0374796 | -3.43 |
| ILMN_1801303 | AMY2A     | -0.17 | 7.79  | -2.66 | 0.009101  | 0.037505  | -3.44 |
| ILMN_1672660 | MBP       | 0.12  | 9.39  | 2.66  | 0.0091145 | 0.0375561 | -3.44 |
| ILMN_2050761 | EIF4E     | 0.07  | 6.60  | 2.66  | 0.0091169 | 0.0375616 | -3.44 |
| ILMN_1779828 | EDEM1     | 0.20  | 8.63  | 2.66  | 0.0091293 | 0.0376081 | -3.44 |
| ILMN_2391891 | MAP2K5    | -0.09 | 6.67  | -2.66 | 0.0091442 | 0.0376649 | -3.44 |
| ILMN_1752294 | PCDH9     | 0.09  | 6.54  | 2.66  | 0.0091483 | 0.0376774 | -3.44 |
| ILMN_1658439 | TRAPPC13  | -0.09 | 6.93  | -2.66 | 0.0091515 | 0.037682  | -3.44 |
| ILMN_3249101 | SDR9C7    | -0.08 | 6.35  | -2.66 | 0.0091516 | 0.037682  | -3.44 |
| ILMN_3252901 | NA        | -0.06 | 6.43  | -2.66 | 0.0091594 | 0.0377097 | -3.45 |
| ILMN_1671890 | UBTFL1    | -0.07 | 6.50  | -2.66 | 0.0091733 | 0.0377622 | -3.44 |
| ILMN_1813430 | TRIM69    | 0.09  | 6.58  | 2.66  | 0.0091802 | 0.0377863 | -3.45 |
| ILMN_1701134 | PTEN      | -0.11 | 8.62  | -2.66 | 0.0091818 | 0.0377881 | -3.44 |
| ILMN_2398107 | ASNS      | 0.13  | 7.55  | 2.66  | 0.0091905 | 0.0378197 | -3.44 |
| ILMN_1672834 | SSH2      | 0.14  | 8.00  | 2.66  | 0.0091939 | 0.0378291 | -3.45 |
| ILMN_2374076 | NRDE2     | -0.08 | 7.31  | -2.66 | 0.0092142 | 0.0379078 | -3.45 |
| ILMN_1801408 | GABRA4    | -0.06 | 6.30  | -2.66 | 0.0092194 | 0.0379247 | -3.45 |
| ILMN_1704305 | NIP7      | 0.13  | 8.63  | 2.66  | 0.0092272 | 0.0379523 | -3.45 |
| ILMN_3250209 | CTBP2     | -0.14 | 7.81  | -2.66 | 0.0092294 | 0.037957  | -3.45 |
| ILMN_3262439 | NA        | 0.11  | 6.80  | 2.66  | 0.0092353 | 0.0379766 | -3.45 |
| ILMN_1759475 | TAS2R39   | -0.06 | 6.38  | -2.66 | 0.0092377 | 0.0379818 | -3.45 |
| ILMN_2407824 | ATP1B1    | -0.19 | 12.01 | -2.66 | 0.0092395 | 0.0379847 | -3.45 |
| ILMN_1805395 | LTBP3     | 0.11  | 7.38  | 2.66  | 0.0092444 | 0.0380006 | -3.45 |
| ILMN_1775926 | SPATA6    | 0.07  | 6.52  | 2.66  | 0.0092536 | 0.0380337 | -3.45 |
| ILMN_1671288 | ODF2      | 0.07  | 6.66  | 2.65  | 0.0092596 | 0.0380537 | -3.46 |
| ILMN_3270833 | NA        | 0.08  | 6.53  | 2.65  | 0.0092615 | 0.0380573 | -3.46 |
| ILMN_1893367 | NA        | -0.07 | 6.58  | -2.65 | 0.0092629 | 0.0380585 | -3.46 |
| ILMN_1778456 | LOC648987 | 0.09  | 6.47  | 2.66  | 0.0092648 | 0.0380618 | -3.45 |
| ILMN_2154052 | KDSR      | 0.15  | 8.37  | 2.65  | 0.0092677 | 0.0380691 | -3.46 |
| ILMN_1691487 | TRAF2     | -0.08 | 6.69  | -2.65 | 0.0092696 | 0.0380721 | -3.46 |
| ILMN_2076600 | ITM2A     | 0.27  | 9.46  | 2.65  | 0.0092946 | 0.0381675 | -3.46 |
| ILMN_2086470 | PDGFRA    | 0.19  | 9.24  | 2.65  | 0.009295  | 0.0381675 | -3.45 |
| ILMN_3239548 | NA        | -0.14 | 7.46  | -2.65 | 0.0093014 | 0.0381893 | -3.46 |
| ILMN_1696004 | LRRK1     | 0.12  | 7.23  | 2.65  | 0.0093235 | 0.038273  | -3.46 |

|              |           |       |       |       |           |           |       |
|--------------|-----------|-------|-------|-------|-----------|-----------|-------|
| ILMN_1706805 | TRPM5     | -0.08 | 6.39  | -2.65 | 0.009324  | 0.038273  | -3.46 |
| ILMN_1815051 | API5      | 0.11  | 9.05  | 2.65  | 0.0093433 | 0.0383474 | -3.46 |
| ILMN_1785141 | MICAL2    | -0.14 | 7.31  | -2.65 | 0.0093527 | 0.0383816 | -3.46 |
| ILMN_1767894 | POLB      | 0.12  | 8.07  | 2.65  | 0.0093559 | 0.0383901 | -3.46 |
| ILMN_2325506 | BCAS4     | 0.22  | 7.02  | 2.65  | 0.0093573 | 0.0383912 | -3.46 |
| ILMN_2384857 | DHRS2     | -0.07 | 6.46  | -2.65 | 0.0093627 | 0.038409  | -3.47 |
| ILMN_1706478 | HOXA7     | -0.08 | 6.35  | -2.65 | 0.0093786 | 0.0384695 | -3.47 |
| ILMN_1795495 | NA        | -0.12 | 9.15  | -2.65 | 0.0093992 | 0.0385494 | -3.47 |
| ILMN_1820572 | NA        | -0.09 | 6.90  | -2.65 | 0.0094072 | 0.0385733 | -3.47 |
| ILMN_2228976 | EIF1AY    | 0.25  | 7.03  | 2.65  | 0.0094062 | 0.0385733 | -3.47 |
| ILMN_1703009 | FAM20C    | 0.07  | 6.43  | 2.65  | 0.0094087 | 0.0385745 | -3.47 |
| ILMN_1792682 | MCTP2     | -0.09 | 6.80  | -2.65 | 0.0094189 | 0.038612  | -3.47 |
| ILMN_2269136 | AGAP3     | 0.08  | 6.80  | 2.65  | 0.0094276 | 0.0386431 | -3.47 |
| ILMN_1668593 | HPX       | -0.06 | 6.49  | -2.65 | 0.0094318 | 0.0386556 | -3.47 |
| ILMN_1694084 | CYTH1     | 0.17  | 9.62  | 2.65  | 0.0094346 | 0.0386626 | -3.47 |
| ILMN_2229170 | MED7      | -0.07 | 6.57  | -2.65 | 0.0094551 | 0.038742  | -3.47 |
| ILMN_1798975 | EGFR      | -0.11 | 7.62  | -2.65 | 0.0094579 | 0.0387488 | -3.47 |
| ILMN_1772888 | NA        | 0.16  | 10.13 | 2.65  | 0.0094619 | 0.0387604 | -3.47 |
| ILMN_1803094 | PDGFD     | -0.16 | 7.37  | -2.65 | 0.00949   | 0.0388662 | -3.48 |
| ILMN_3238078 | SNORA3B   | 0.08  | 6.99  | 2.65  | 0.0094899 | 0.0388662 | -3.48 |
| ILMN_2343310 | DYNC2H1   | 0.11  | 7.06  | 2.65  | 0.0094996 | 0.038901  | -3.48 |
| ILMN_2218856 | NA        | 0.17  | 6.48  | 2.65  | 0.0095032 | 0.0389113 | -3.48 |
| ILMN_1751195 | ABHD17A   | -0.11 | 7.42  | -2.65 | 0.0095232 | 0.0389886 | -3.47 |
| ILMN_1699606 | NA        | 0.08  | 6.74  | 2.64  | 0.0095245 | 0.0389893 | -3.48 |
| ILMN_1758214 | RARS2     | -0.09 | 8.21  | -2.64 | 0.0095286 | 0.0390014 | -3.48 |
| ILMN_1696843 | LOC613037 | -0.21 | 9.76  | -2.64 | 0.009534  | 0.039019  | -3.48 |
| ILMN_2096012 | UHMK1     | -0.09 | 7.11  | -2.64 | 0.0095394 | 0.0390362 | -3.48 |
| ILMN_1667826 | SERPINE3  | 0.06  | 6.49  | 2.64  | 0.0095443 | 0.0390515 | -3.48 |
| ILMN_1771949 | TAF4B     | 0.07  | 6.57  | 2.64  | 0.0095478 | 0.0390612 | -3.48 |
| ILMN_1698777 | ADCK1     | -0.10 | 7.13  | -2.64 | 0.0095521 | 0.0390741 | -3.48 |
| ILMN_1703524 | SRP68     | 0.08  | 8.52  | 2.64  | 0.0095575 | 0.0390917 | -3.48 |
| ILMN_1726901 | KLC1      | 0.11  | 7.17  | 2.64  | 0.0095593 | 0.0390943 | -3.48 |
| ILMN_2253300 | TM9SF1    | 0.08  | 6.54  | 2.64  | 0.009563  | 0.039105  | -3.48 |
| ILMN_1811955 | PRMT5     | 0.10  | 7.79  | 2.64  | 0.0095651 | 0.0391087 | -3.48 |
| ILMN_1702168 | HSD17B12  | 0.19  | 9.58  | 2.64  | 0.0095735 | 0.0391386 | -3.48 |
| ILMN_1787324 | ENKD1     | 0.11  | 7.92  | 2.64  | 0.0095764 | 0.039146  | -3.49 |
| ILMN_3289352 | RPL6      | 0.22  | 8.64  | 2.64  | 0.0096098 | 0.0392778 | -3.49 |
| ILMN_1739558 | CRELD1    | -0.12 | 8.05  | -2.64 | 0.0096143 | 0.0392913 | -3.49 |
| ILMN_1718633 | LRP5L     | 0.12  | 7.72  | 2.64  | 0.0096194 | 0.0393077 | -3.49 |
| ILMN_1760294 | ZNF417    | -0.09 | 6.84  | -2.64 | 0.0096217 | 0.0393125 | -3.49 |
| ILMN_2354211 | RCC1      | -0.06 | 6.37  | -2.64 | 0.0096279 | 0.0393328 | -3.49 |
| ILMN_1727389 | CDC16     | -0.11 | 9.16  | -2.64 | 0.0096348 | 0.0393567 | -3.49 |
| ILMN_1739886 | HNF4A     | -0.07 | 6.48  | -2.64 | 0.009644  | 0.0393894 | -3.49 |
| ILMN_1861437 | NA        | -0.08 | 6.49  | -2.64 | 0.0096753 | 0.0395125 | -3.49 |
| ILMN_1776375 | PIN1      | -0.10 | 9.14  | -2.64 | 0.0096805 | 0.039529  | -3.49 |
| ILMN_1697469 | SRSF6     | -0.13 | 11.31 | -2.64 | 0.009699  | 0.0396002 | -3.50 |
| ILMN_1682778 | MXRA8     | 0.09  | 6.65  | 2.64  | 0.0097179 | 0.0396727 | -3.50 |
| ILMN_1760305 | FBRSL1    | -0.11 | 7.01  | -2.64 | 0.0097264 | 0.0397027 | -3.50 |



|              |           |       |       |       |           |           |       |
|--------------|-----------|-------|-------|-------|-----------|-----------|-------|
| ILMN_1722845 | RAB3B     | -0.08 | 6.54  | -2.64 | 0.0097281 | 0.0397048 | -3.50 |
| ILMN_1772700 | TMEM18    | -0.08 | 6.82  | -2.64 | 0.0097354 | 0.0397299 | -3.50 |
| ILMN_1703226 | KTI12     | 0.08  | 7.60  | 2.64  | 0.0097374 | 0.0397332 | -3.50 |
| ILMN_1658160 | NA        | -0.12 | 8.04  | -2.64 | 0.0097606 | 0.0398231 | -3.50 |
| ILMN_2070044 | PPM1K     | 0.09  | 6.73  | 2.64  | 0.0097642 | 0.0398331 | -3.50 |
| ILMN_1654583 | CHD1      | 0.15  | 8.82  | 2.64  | 0.009768  | 0.0398439 | -3.50 |
| ILMN_2053178 | ACTG1     | 0.11  | 13.64 | 2.64  | 0.0097738 | 0.0398629 | -3.50 |
| ILMN_1807662 | IGF2R     | -0.10 | 9.91  | -2.64 | 0.0097803 | 0.0398847 | -3.50 |
| ILMN_1747195 | PSMB8     | 0.16  | 8.64  | 2.64  | 0.0097842 | 0.0398957 | -3.50 |
| ILMN_3210538 | NA        | 0.19  | 11.71 | 2.63  | 0.0097911 | 0.0399192 | -3.51 |
| ILMN_1673738 | RPL6      | 0.15  | 10.75 | 2.63  | 0.0098009 | 0.0399468 | -3.51 |
| ILMN_2150856 | SERPINB2  | 0.20  | 6.56  | 2.63  | 0.0097995 | 0.0399468 | -3.51 |
| ILMN_2243697 | ZDHC13    | -0.10 | 6.65  | -2.63 | 0.0098013 | 0.0399468 | -3.51 |
| ILMN_1805833 | FAM90A27P | -0.07 | 6.81  | -2.63 | 0.0098071 | 0.0399658 | -3.51 |
| ILMN_1805792 | TRIO      | -0.08 | 7.01  | -2.63 | 0.00982   | 0.0400136 | -3.51 |
| ILMN_1657754 | RPAP2     | -0.08 | 7.39  | -2.63 | 0.0098295 | 0.0400476 | -3.51 |
| ILMN_1671276 | FFAR3     | -0.07 | 6.39  | -2.63 | 0.0098368 | 0.040068  | -3.51 |
| ILMN_2236800 | SON       | 0.12  | 7.45  | 2.63  | 0.0098368 | 0.040068  | -3.51 |
| ILMN_3309209 | MIR495    | 0.07  | 6.35  | 2.63  | 0.0098596 | 0.0401559 | -3.51 |
| ILMN_1696556 | URB2      | 0.07  | 6.79  | 2.63  | 0.0098614 | 0.0401583 | -3.51 |
| ILMN_1692739 | ISLR2     | 0.07  | 6.45  | 2.63  | 0.0098674 | 0.040178  | -3.51 |
| ILMN_1719694 | ARID1B    | -0.10 | 7.98  | -2.63 | 0.0098733 | 0.0401974 | -3.51 |
| ILMN_2150284 | RNPC3     | -0.13 | 7.43  | -2.63 | 0.009883  | 0.0402323 | -3.51 |
| ILMN_1767135 | SOS1      | -0.13 | 6.83  | -2.63 | 0.0098866 | 0.0402421 | -3.51 |
| ILMN_1656463 | C11orf73  | 0.08  | 6.64  | 2.63  | 0.0098986 | 0.0402861 | -3.51 |
| ILMN_1790810 | HCN4      | -0.07 | 6.58  | -2.63 | 0.0099014 | 0.040293  | -3.52 |
| ILMN_1914927 | NA        | 0.08  | 6.46  | 2.63  | 0.0099128 | 0.0403344 | -3.52 |
| ILMN_1696302 | FABP5     | 0.19  | 7.38  | 2.63  | 0.0099393 | 0.0404337 | -3.52 |
| ILMN_1734814 | HSPA4     | 0.10  | 7.12  | 2.63  | 0.0099395 | 0.0404337 | -3.52 |
| ILMN_2134110 | SELK      | 0.19  | 8.44  | 2.63  | 0.0099512 | 0.0404765 | -3.52 |
| ILMN_1805590 | LSM8      | -0.08 | 6.95  | -2.63 | 0.0099594 | 0.0405043 | -3.52 |
| ILMN_1901399 | NA        | -0.07 | 6.46  | -2.63 | 0.0099604 | 0.0405043 | -3.52 |
| ILMN_1814971 | TCF25     | -0.10 | 9.77  | -2.63 | 0.0099654 | 0.0405196 | -3.52 |
| ILMN_1815745 | SOX4      | -0.09 | 8.44  | -2.63 | 0.009977  | 0.0405622 | -3.52 |
| ILMN_2324574 | RALGAPA1  | -0.11 | 8.19  | -2.63 | 0.0099799 | 0.040569  | -3.52 |
| ILMN_1738767 | PLP2      | 0.11  | 7.25  | 2.63  | 0.0099839 | 0.0405796 | -3.52 |
| ILMN_1806023 | JUN       | 0.26  | 9.61  | 2.63  | 0.0099848 | 0.0405796 | -3.52 |
| ILMN_2167915 | DSEL      | 0.07  | 6.44  | 2.63  | 0.0099909 | 0.0405997 | -3.52 |
| ILMN_1668374 | ITGB5     | 0.12  | 9.81  | 2.63  | 0.009995  | 0.0406115 | -3.52 |
| ILMN_2319544 | CAMK2D    | -0.08 | 6.73  | -2.63 | 0.0099982 | 0.0406197 | -3.52 |
| ILMN_1654518 | SAP25     | -0.18 | 7.79  | -2.63 | 0.0100098 | 0.040662  | -3.52 |
| ILMN_1744113 | TNFAIP8L2 | 0.07  | 6.39  | 2.63  | 0.0100141 | 0.040672  | -3.53 |
| ILMN_2116075 | TRUB2     | -0.08 | 6.85  | -2.63 | 0.0100146 | 0.040672  | -3.53 |
| ILMN_1662427 | PTP4A3    | 0.10  | 6.59  | 2.63  | 0.0100167 | 0.0406757 | -3.53 |
| ILMN_1685427 | NA        | -0.09 | 6.59  | -2.63 | 0.0100381 | 0.0407578 | -3.53 |
| ILMN_1751431 | PYM1      | -0.12 | 7.57  | -2.63 | 0.0100412 | 0.0407656 | -3.53 |
| ILMN_1675191 | GAPT      | 0.23  | 7.01  | 2.62  | 0.0100548 | 0.0408161 | -3.53 |
| ILMN_3197652 | ERI2      | -0.09 | 6.73  | -2.62 | 0.0100589 | 0.0408278 | -3.53 |

|              |            |       |       |       |           |           |       |
|--------------|------------|-------|-------|-------|-----------|-----------|-------|
| ILMN_2233334 | MYH16      | -0.05 | 6.25  | -2.62 | 0.0100732 | 0.0408809 | -3.53 |
| ILMN_1698395 | GNB5       | 0.07  | 6.46  | 2.62  | 0.0100786 | 0.0408979 | -3.53 |
| ILMN_1721978 | CARD11     | 0.18  | 7.10  | 2.62  | 0.0100814 | 0.0409047 | -3.52 |
| ILMN_3236021 | NA         | 0.17  | 8.69  | 2.62  | 0.0101065 | 0.0410015 | -3.53 |
| ILMN_1804445 | ATF7IP2    | 0.11  | 6.97  | 2.62  | 0.0101084 | 0.0410046 | -3.53 |
| ILMN_1764500 | BRK1       | 0.13  | 9.07  | 2.62  | 0.0101114 | 0.0410222 | -3.53 |
| ILMN_3247223 | TPBG       | 0.10  | 6.95  | 2.62  | 0.0101165 | 0.0410278 | -3.53 |
| ILMN_1708485 | BIN3       | -0.10 | 7.03  | -2.62 | 0.0101269 | 0.0410651 | -3.54 |
| ILMN_1799853 | SPTLC1     | -0.13 | 7.38  | -2.62 | 0.0101308 | 0.041076  | -3.54 |
| ILMN_2293758 | AKAP11     | 0.13  | 8.57  | 2.62  | 0.0101391 | 0.0411047 | -3.54 |
| ILMN_2317923 | TMEM132A   | 0.08  | 6.49  | 2.62  | 0.0101403 | 0.0411047 | -3.54 |
| ILMN_1690473 | NFKBIB     | 0.06  | 6.61  | 2.62  | 0.0101582 | 0.0411725 | -3.54 |
| ILMN_2143427 | LGSN       | -0.17 | 6.46  | -2.62 | 0.0101633 | 0.0411885 | -3.54 |
| ILMN_1779800 | MARK1      | 0.09  | 6.65  | 2.62  | 0.0101678 | 0.0412019 | -3.54 |
| ILMN_1708714 | STMN1      | -0.06 | 6.27  | -2.62 | 0.0101805 | 0.0412483 | -3.54 |
| ILMN_2196335 | ASUN       | 0.10  | 6.81  | 2.62  | 0.0101866 | 0.0412683 | -3.54 |
| ILMN_1798926 | SOCS2      | 0.11  | 7.33  | 2.62  | 0.0101893 | 0.0412742 | -3.54 |
| ILMN_1693227 | ZC3H7A     | 0.10  | 8.68  | 2.62  | 0.0101956 | 0.0412951 | -3.54 |
| ILMN_2375160 | PHF7       | -0.07 | 6.43  | -2.62 | 0.010201  | 0.0413122 | -3.54 |
| ILMN_2381397 | HSPD1      | 0.15  | 11.40 | 2.62  | 0.0102022 | 0.0413122 | -3.54 |
| ILMN_2212999 | KIF5C      | -0.24 | 7.17  | -2.62 | 0.0102064 | 0.0413242 | -3.54 |
| ILMN_1680902 | LINC01114  | 0.09  | 6.48  | 2.62  | 0.0102098 | 0.041333  | -3.54 |
| ILMN_1706644 | BDNF       | 0.06  | 6.42  | 2.62  | 0.010211  | 0.041333  | -3.54 |
| ILMN_3298716 | FOSL1      | 0.07  | 6.46  | 2.62  | 0.0102153 | 0.0413459 | -3.54 |
| ILMN_1750029 | GABPA      | -0.11 | 7.52  | -2.62 | 0.0102286 | 0.0413897 | -3.54 |
| ILMN_2053546 | RPL19      | 0.13  | 11.21 | 2.62  | 0.0102281 | 0.0413897 | -3.54 |
| ILMN_2115633 | CD320      | -0.14 | 7.79  | -2.62 | 0.0102351 | 0.0414065 | -3.54 |
| ILMN_3245314 | EVA1B      | 0.07  | 6.65  | 2.62  | 0.0102341 | 0.0414065 | -3.54 |
| ILMN_2215211 | ZNF514     | -0.12 | 7.50  | -2.62 | 0.0102444 | 0.0414391 | -3.55 |
| ILMN_3307858 | STIM2      | 0.10  | 7.09  | 2.62  | 0.0102487 | 0.0414518 | -3.55 |
| ILMN_2390859 | NFKB2      | 0.11  | 6.80  | 2.62  | 0.0102569 | 0.0414798 | -3.55 |
| ILMN_1684623 | ZNF197     | 0.06  | 6.31  | 2.62  | 0.0102592 | 0.0414802 | -3.55 |
| ILMN_1771003 | HAUS4      | -0.11 | 7.71  | -2.62 | 0.0102594 | 0.0414802 | -3.54 |
| ILMN_1707380 | PRELP      | 0.07  | 6.56  | 2.62  | 0.0102797 | 0.0415574 | -3.55 |
| ILMN_1652753 | PAAF1      | -0.13 | 7.87  | -2.62 | 0.010293  | 0.0416066 | -3.55 |
| ILMN_1700477 | MRPL43     | -0.13 | 7.79  | -2.62 | 0.0102957 | 0.0416125 | -3.55 |
| ILMN_2060578 | INSL5      | -0.57 | 8.03  | -2.62 | 0.0103253 | 0.0417272 | -3.55 |
| ILMN_1761834 | PTGER4P2-C | 0.08  | 6.47  | 2.61  | 0.0103449 | 0.0418015 | -3.55 |
| ILMN_2278246 | PDE11A     | -0.06 | 6.26  | -2.61 | 0.0103552 | 0.0418383 | -3.56 |
| ILMN_2240866 | MASP1      | 0.08  | 6.43  | 2.61  | 0.0103614 | 0.0418584 | -3.56 |
| ILMN_2360229 | MAPKAP1    | -0.10 | 7.26  | -2.61 | 0.0103654 | 0.0418696 | -3.56 |
| ILMN_2357944 | KCNJ1      | 0.06  | 6.34  | 2.61  | 0.0103683 | 0.0418764 | -3.56 |
| ILMN_1782412 | IRX2       | 0.22  | 6.92  | 2.61  | 0.0103813 | 0.0419242 | -3.56 |
| ILMN_1859701 | NA         | -0.08 | 6.75  | -2.61 | 0.0103913 | 0.0419594 | -3.56 |
| ILMN_2273609 | CAMSAP3    | -0.08 | 6.55  | -2.61 | 0.0103956 | 0.0419718 | -3.55 |
| ILMN_1809117 | MAD2L1BP   | 0.06  | 6.26  | 2.61  | 0.0104094 | 0.0420228 | -3.55 |
| ILMN_2285951 | PCDH11X    | 0.07  | 6.45  | 2.61  | 0.0104109 | 0.042024  | -3.56 |
| ILMN_2063114 | TAF1D      | 0.07  | 6.47  | 2.61  | 0.0104166 | 0.042042  | -3.56 |

|              |           |       |       |       |           |           |       |
|--------------|-----------|-------|-------|-------|-----------|-----------|-------|
| ILMN_1753312 | PLXDC2    | 0.12  | 7.31  | 2.61  | 0.0104188 | 0.0420461 | -3.56 |
| ILMN_1692688 | NA        | -0.07 | 6.58  | -2.61 | 0.0104234 | 0.0420546 | -3.56 |
| ILMN_1729269 | LOC285074 | -0.08 | 6.78  | -2.61 | 0.0104228 | 0.0420546 | -3.56 |
| ILMN_1653878 | CACNB2    | 0.13  | 7.17  | 2.61  | 0.0104318 | 0.0420788 | -3.56 |
| ILMN_1681757 | NA        | 0.07  | 6.42  | 2.61  | 0.0104309 | 0.0420788 | -3.56 |
| ILMN_1688404 | ZMYM4     | 0.10  | 7.79  | 2.61  | 0.0104392 | 0.0421036 | -3.56 |
| ILMN_1702322 | ALS2CL    | -0.12 | 6.81  | -2.61 | 0.0104503 | 0.0421435 | -3.56 |
| ILMN_1807737 | AKAP17A   | 0.13  | 8.31  | 2.61  | 0.0104528 | 0.0421488 | -3.56 |
| ILMN_1742881 | SYT1      | 0.07  | 6.35  | 2.61  | 0.0104612 | 0.0421654 | -3.56 |
| ILMN_1749362 | CD28      | 0.10  | 6.58  | 2.61  | 0.0104594 | 0.0421654 | -3.56 |
| ILMN_2408024 | PDE5A     | -0.07 | 6.51  | -2.61 | 0.0104619 | 0.0421654 | -3.56 |
| ILMN_3212373 | NA        | 0.14  | 8.15  | 2.61  | 0.0104585 | 0.0421654 | -3.56 |
| ILMN_1729713 | RAB23     | 0.07  | 6.39  | 2.61  | 0.0104728 | 0.0422045 | -3.57 |
| ILMN_1815878 | LAMTOR1   | -0.12 | 9.18  | -2.61 | 0.0104932 | 0.0422819 | -3.57 |
| ILMN_1753773 | ANAPC11   | -0.06 | 6.52  | -2.61 | 0.0105008 | 0.0423077 | -3.56 |
| ILMN_2387471 | PRR36     | 0.10  | 6.59  | 2.61  | 0.0105065 | 0.0423256 | -3.57 |
| ILMN_3260017 | HNRNPK    | -0.08 | 6.75  | -2.61 | 0.0105086 | 0.0423291 | -3.57 |
| ILMN_1711270 | SUGP2     | -0.12 | 9.78  | -2.61 | 0.0105281 | 0.0424028 | -3.57 |
| ILMN_1701289 | NA        | 0.09  | 6.69  | 2.61  | 0.0105329 | 0.042417  | -3.57 |
| ILMN_1681888 | PRKAR2A   | -0.12 | 7.22  | -2.61 | 0.0105455 | 0.042458  | -3.57 |
| ILMN_1687782 | RAD17     | -0.08 | 6.95  | -2.61 | 0.0105443 | 0.042458  | -3.57 |
| ILMN_2159453 | STXBP2    | -0.18 | 8.49  | -2.61 | 0.0105748 | 0.0425709 | -3.57 |
| ILMN_1655921 | GTF2E1    | 0.09  | 7.27  | 2.61  | 0.0105807 | 0.0425894 | -3.57 |
| ILMN_1766991 | ABRA      | -0.06 | 6.29  | -2.61 | 0.010585  | 0.042602  | -3.57 |
| ILMN_3239378 | TADA2B    | -0.11 | 7.46  | -2.61 | 0.0106006 | 0.0426597 | -3.58 |
| ILMN_2059549 | SYK       | 0.16  | 8.70  | 2.61  | 0.0106105 | 0.0426948 | -3.58 |
| ILMN_1769027 | CDC42SE1  | 0.11  | 6.92  | 2.61  | 0.0106153 | 0.0427091 | -3.58 |
| ILMN_1791052 | FKBPL     | -0.08 | 6.55  | -2.60 | 0.0106192 | 0.0427195 | -3.58 |
| ILMN_2103720 | MRPL15    | -0.10 | 8.11  | -2.60 | 0.0106358 | 0.0427816 | -3.58 |
| ILMN_1793854 | INTS1     | -0.09 | 7.05  | -2.60 | 0.0106487 | 0.0428284 | -3.58 |
| ILMN_1882708 | NA        | -0.06 | 6.55  | -2.60 | 0.0106594 | 0.0428663 | -3.58 |
| ILMN_1673704 | INA       | 0.07  | 6.36  | 2.60  | 0.010665  | 0.0428838 | -3.58 |
| ILMN_1779852 | FABP5P3   | 0.13  | 7.07  | 2.60  | 0.0106689 | 0.0428945 | -3.58 |
| ILMN_1756982 | CLIC1     | 0.15  | 10.95 | 2.60  | 0.0106744 | 0.0429116 | -3.58 |
| ILMN_2389590 | PRKAR1A   | 0.46  | 9.33  | 2.60  | 0.0106758 | 0.0429123 | -3.58 |
| ILMN_1676322 | KDF1      | -0.09 | 6.85  | -2.60 | 0.0106772 | 0.0429129 | -3.58 |
| ILMN_1657893 | TXNRD2    | -0.09 | 7.43  | -2.60 | 0.0107091 | 0.0430361 | -3.59 |
| ILMN_2373285 | MSR1      | 0.10  | 6.57  | 2.60  | 0.0107161 | 0.0430591 | -3.57 |
| ILMN_1752682 | WDR78     | -0.10 | 6.63  | -2.60 | 0.0107326 | 0.0431207 | -3.58 |
| ILMN_1668027 | NDUFB4    | 0.13  | 7.38  | 2.60  | 0.0107359 | 0.0431285 | -3.58 |
| ILMN_1842582 | TTC39C    | 0.10  | 6.91  | 2.60  | 0.0107388 | 0.0431355 | -3.59 |
| ILMN_1723607 | GPHN      | -0.07 | 6.65  | -2.60 | 0.010763  | 0.0432274 | -3.58 |
| ILMN_1809483 | HSD17B14  | 0.08  | 6.41  | 2.60  | 0.01077   | 0.0432506 | -3.59 |
| ILMN_1684193 | NA        | -0.08 | 6.37  | -2.60 | 0.0107894 | 0.0433236 | -3.59 |
| ILMN_1804490 | NA        | -0.10 | 7.44  | -2.60 | 0.0107983 | 0.0433543 | -3.59 |
| ILMN_1690616 | SMIM5     | -0.11 | 6.58  | -2.60 | 0.0108015 | 0.0433593 | -3.59 |
| ILMN_1747412 | DPP3      | -0.10 | 6.77  | -2.60 | 0.0108021 | 0.0433593 | -3.59 |
| ILMN_2393169 | THOC5     | 0.08  | 7.28  | 2.60  | 0.0108172 | 0.0434148 | -3.59 |

|              |            |       |       |       |           |           |       |
|--------------|------------|-------|-------|-------|-----------|-----------|-------|
| ILMN_1785389 | ABHD2      | -0.07 | 6.34  | -2.60 | 0.0108236 | 0.0434356 | -3.59 |
| ILMN_2045729 | WDR12      | 0.12  | 8.06  | 2.60  | 0.0108279 | 0.0434477 | -3.59 |
| ILMN_1780887 | USP21      | -0.09 | 7.28  | -2.60 | 0.0108308 | 0.0434542 | -3.60 |
| ILMN_1708922 | ABL1       | 0.07  | 6.44  | 2.60  | 0.0108411 | 0.0434905 | -3.60 |
| ILMN_1810759 | MMADHC     | 0.12  | 9.99  | 2.60  | 0.0108494 | 0.0435186 | -3.60 |
| ILMN_1725139 | CA9        | 0.13  | 6.43  | 2.60  | 0.0108512 | 0.0435211 | -3.60 |
| ILMN_1715259 | OR6V1      | -0.06 | 6.40  | -2.60 | 0.0108729 | 0.0436029 | -3.60 |
| ILMN_2295252 | C9orf72    | 0.07  | 6.56  | 2.60  | 0.0108796 | 0.0436248 | -3.60 |
| ILMN_1677979 | NA         | -0.07 | 6.48  | -2.60 | 0.010892  | 0.0436691 | -3.60 |
| ILMN_1769787 | SELO       | -0.09 | 7.22  | -2.60 | 0.0108967 | 0.0436832 | -3.60 |
| ILMN_3292297 | LOC1001321 | -0.07 | 6.40  | -2.59 | 0.0109143 | 0.0437484 | -3.60 |
| ILMN_1784227 | MCRS1      | -0.11 | 9.01  | -2.59 | 0.0109279 | 0.0437981 | -3.60 |
| ILMN_1801302 | SCN1B      | 0.07  | 6.40  | 2.59  | 0.0109296 | 0.0437996 | -3.60 |
| ILMN_1775734 | SH2D3C     | 0.11  | 6.74  | 2.59  | 0.0109372 | 0.0438252 | -3.60 |
| ILMN_1674866 | TADA3      | -0.09 | 8.08  | -2.59 | 0.010944  | 0.0438473 | -3.60 |
| ILMN_1805828 | VRK1       | 0.11  | 7.25  | 2.59  | 0.0109557 | 0.0438892 | -3.61 |
| ILMN_2407703 | SYN1       | 0.06  | 6.56  | 2.59  | 0.0109697 | 0.0439398 | -3.61 |
| ILMN_2197247 | POLR3A     | -0.09 | 7.67  | -2.59 | 0.0109729 | 0.0439475 | -3.61 |
| ILMN_1775111 | SND1       | 0.13  | 8.75  | 2.59  | 0.0109847 | 0.0439897 | -3.61 |
| ILMN_1795949 | CORO7      | 0.10  | 7.45  | 2.59  | 0.0110115 | 0.0440817 | -3.61 |
| ILMN_1800390 | ZNF511     | -0.12 | 8.51  | -2.59 | 0.0110103 | 0.0440817 | -3.61 |
| ILMN_3298065 | NA         | 0.07  | 6.37  | 2.59  | 0.011011  | 0.0440817 | -3.60 |
| ILMN_1718706 | ERAL1      | -0.09 | 8.53  | -2.59 | 0.0110288 | 0.0441458 | -3.61 |
| ILMN_1667081 | CCND2      | -0.23 | 9.67  | -2.59 | 0.0110443 | 0.0442007 | -3.61 |
| ILMN_2110532 | RPL26L1    | 0.11  | 8.36  | 2.59  | 0.011045  | 0.0442007 | -3.61 |
| ILMN_1742788 | PKD1L2     | 0.08  | 6.38  | 2.59  | 0.0110525 | 0.0442253 | -3.61 |
| ILMN_1683933 | SERPINA9   | 0.12  | 6.43  | 2.59  | 0.0110926 | 0.0443808 | -3.62 |
| ILMN_1767690 | SENP8      | -0.07 | 6.48  | -2.59 | 0.0111009 | 0.0444086 | -3.62 |
| ILMN_1790149 | HGF        | 0.06  | 6.39  | 2.59  | 0.0111073 | 0.0444293 | -3.62 |
| ILMN_1700727 | KLF6       | -0.12 | 6.73  | -2.59 | 0.0111287 | 0.0445095 | -3.62 |
| ILMN_1890924 | NA         | -0.07 | 6.44  | -2.59 | 0.011135  | 0.0445298 | -3.62 |
| ILMN_2054271 | GPR135     | 0.08  | 6.44  | 2.59  | 0.0111372 | 0.0445334 | -3.62 |
| ILMN_2199362 | FBXL22     | -0.07 | 6.46  | -2.59 | 0.0111439 | 0.0445522 | -3.62 |
| ILMN_2338268 | ABHD11     | -0.12 | 6.99  | -2.59 | 0.0111445 | 0.0445522 | -3.62 |
| ILMN_2301083 | UBE2C      | 0.26  | 8.29  | 2.59  | 0.0111479 | 0.0445607 | -3.62 |
| ILMN_1677261 | LZTS1      | 0.07  | 6.34  | 2.59  | 0.0111559 | 0.0445874 | -3.62 |
| ILMN_1673395 | PIGO       | -0.08 | 6.65  | -2.59 | 0.0111622 | 0.0446072 | -3.62 |
| ILMN_1707943 | SWSAP1     | -0.07 | 6.54  | -2.59 | 0.0111796 | 0.0446677 | -3.62 |
| ILMN_1774017 | TRIM51GP   | -0.10 | 6.41  | -2.59 | 0.0111799 | 0.0446677 | -3.62 |
| ILMN_1768363 | BAP1       | -0.12 | 7.21  | -2.59 | 0.0111816 | 0.0446692 | -3.62 |
| ILMN_1778294 | SENP7      | -0.07 | 6.67  | -2.58 | 0.0112201 | 0.0448179 | -3.63 |
| ILMN_1677607 | SC5D       | -0.15 | 8.54  | -2.58 | 0.0112234 | 0.0448261 | -3.63 |
| ILMN_1676289 | NCAM1      | 0.10  | 6.69  | 2.58  | 0.0112261 | 0.0448317 | -3.63 |
| ILMN_1779984 | ACE        | -0.08 | 6.51  | -2.58 | 0.0112381 | 0.0448741 | -3.63 |
| ILMN_2167616 | NACA       | 0.12  | 11.61 | 2.58  | 0.0112471 | 0.0449052 | -3.63 |
| ILMN_2397230 | USP16      | 0.12  | 8.56  | 2.58  | 0.0112521 | 0.0449196 | -3.62 |
| ILMN_1766079 | SULT1C2    | 0.26  | 6.77  | 2.58  | 0.0112589 | 0.0449367 | -3.63 |
| ILMN_1793549 | PTPN4      | 0.09  | 7.41  | 2.58  | 0.0112589 | 0.0449367 | -3.63 |

|              |           |       |       |       |           |           |       |
|--------------|-----------|-------|-------|-------|-----------|-----------|-------|
| ILMN_1763409 | LRR8D     | -0.09 | 7.34  | -2.58 | 0.0112613 | 0.0449407 | -3.63 |
| ILMN_1767643 | CTRB2     | -0.07 | 6.53  | -2.58 | 0.0112684 | 0.0449642 | -3.63 |
| ILMN_1854383 | NA        | -0.10 | 6.98  | -2.58 | 0.0112737 | 0.0449801 | -3.63 |
| ILMN_1667261 | PJA1      | 0.09  | 6.37  | 2.58  | 0.0112757 | 0.0449826 | -3.62 |
| ILMN_1655904 | ROR1      | 0.10  | 6.83  | 2.58  | 0.0112801 | 0.0449901 | -3.63 |
| ILMN_3249035 | NFE2L3    | -0.06 | 6.40  | -2.58 | 0.0112801 | 0.0449901 | -3.63 |
| ILMN_1733831 | PGBD5     | -0.06 | 6.37  | -2.58 | 0.0112827 | 0.044995  | -3.63 |
| ILMN_1731180 | EXOC2     | -0.08 | 7.00  | -2.58 | 0.0112901 | 0.0450196 | -3.63 |
| ILMN_1678841 | UBD       | 0.45  | 7.76  | 2.58  | 0.0113028 | 0.0450595 | -3.63 |
| ILMN_3225471 | NA        | -0.08 | 6.68  | -2.58 | 0.0113023 | 0.0450595 | -3.63 |
| ILMN_2336094 | TENM3     | 0.09  | 6.54  | 2.58  | 0.0113055 | 0.0450652 | -3.63 |
| ILMN_1692398 | CNTNAP1   | 0.17  | 7.08  | 2.58  | 0.0113118 | 0.0450852 | -3.63 |
| ILMN_3240557 | NA        | -0.06 | 6.41  | -2.58 | 0.0113235 | 0.0451266 | -3.63 |
| ILMN_1746213 | SNX20     | -0.06 | 6.32  | -2.58 | 0.0113633 | 0.0452767 | -3.64 |
| ILMN_1749907 | CCT6P3    | -0.08 | 6.65  | -2.58 | 0.0113638 | 0.0452767 | -3.64 |
| ILMN_1745116 | ABHD12    | 0.13  | 7.52  | 2.58  | 0.0113683 | 0.0452894 | -3.64 |
| ILMN_1719883 | CYP4F11   | -0.23 | 6.91  | -2.58 | 0.0113708 | 0.0452913 | -3.64 |
| ILMN_2192316 | TOP1      | 0.12  | 7.24  | 2.58  | 0.0113714 | 0.0452913 | -3.63 |
| ILMN_2231985 | HSPA13    | 0.09  | 6.72  | 2.58  | 0.0113728 | 0.0452916 | -3.64 |
| ILMN_1677487 | ANKZF1    | -0.11 | 7.52  | -2.58 | 0.0113755 | 0.0452971 | -3.64 |
| ILMN_1759915 | ARPC1A    | -0.15 | 9.96  | -2.58 | 0.0113775 | 0.0452998 | -3.63 |
| ILMN_1872419 | NA        | -0.24 | 10.32 | -2.58 | 0.0113811 | 0.0453087 | -3.64 |
| ILMN_2181363 | UBE3C     | 0.10  | 9.79  | 2.58  | 0.0113875 | 0.045329  | -3.64 |
| ILMN_3306028 | NA        | 0.07  | 6.64  | 2.58  | 0.0113901 | 0.0453344 | -3.64 |
| ILMN_2269256 | DNAJC12   | 0.27  | 7.76  | 2.58  | 0.0114031 | 0.0453809 | -3.64 |
| ILMN_1701375 | FBXW5     | -0.12 | 7.62  | -2.58 | 0.0114252 | 0.0454633 | -3.64 |
| ILMN_1657550 | MVD       | -0.12 | 6.96  | -2.58 | 0.0114344 | 0.045495  | -3.64 |
| ILMN_1680726 | SYTL5     | -0.06 | 6.54  | -2.58 | 0.0114397 | 0.0455107 | -3.64 |
| ILMN_2352633 | ARHGAP24  | 0.08  | 6.68  | 2.58  | 0.0114547 | 0.0455651 | -3.65 |
| ILMN_3249175 | LINC00426 | 0.09  | 6.67  | 2.58  | 0.0114603 | 0.0455821 | -3.65 |
| ILMN_3245365 | SNORA6    | 0.09  | 6.86  | 2.58  | 0.0114675 | 0.0456053 | -3.62 |
| ILMN_1764795 | FMN2      | -0.08 | 6.50  | -2.58 | 0.0114829 | 0.0456615 | -3.65 |
| ILMN_1779404 | PUF60     | -0.13 | 9.63  | -2.58 | 0.011497  | 0.0457121 | -3.65 |
| ILMN_1780382 | SPCS2P4   | 0.26  | 8.86  | 2.58  | 0.0114994 | 0.0457163 | -3.65 |
| ILMN_2071826 | RNF152    | -0.07 | 6.65  | -2.58 | 0.0115117 | 0.0457603 | -3.65 |
| ILMN_1845347 | NA        | -0.07 | 6.50  | -2.58 | 0.0115143 | 0.0457653 | -3.65 |
| ILMN_3213261 | BTBD6     | -0.08 | 6.60  | -2.57 | 0.0115475 | 0.045892  | -3.65 |
| ILMN_1686679 | ZNF462    | -0.14 | 7.68  | -2.57 | 0.011551  | 0.0459003 | -3.65 |
| ILMN_1733746 | REEP1     | 0.23  | 6.95  | 2.57  | 0.0115532 | 0.0459037 | -3.65 |
| ILMN_1739345 | LBHD1     | -0.14 | 8.34  | -2.57 | 0.0115595 | 0.0459217 | -3.65 |
| ILMN_2205032 | MAGEE1    | 0.09  | 6.90  | 2.57  | 0.0115604 | 0.0459217 | -3.65 |
| ILMN_1704206 | NPSR1     | 0.12  | 6.55  | 2.57  | 0.0115811 | 0.0459989 | -3.65 |
| ILMN_3282436 | EIF3F     | 0.13  | 8.32  | 2.57  | 0.0115842 | 0.0460058 | -3.66 |
| ILMN_1684278 | SNORD38A  | 0.07  | 6.54  | 2.57  | 0.0115967 | 0.0460502 | -3.66 |
| ILMN_1717029 | NA        | 0.09  | 6.58  | 2.57  | 0.011601  | 0.0460566 | -3.66 |
| ILMN_1792528 | RPS25     | 0.08  | 13.44 | 2.57  | 0.0116001 | 0.0460566 | -3.66 |
| ILMN_2411127 | YBEY      | -0.12 | 6.92  | -2.57 | 0.0116107 | 0.0460898 | -3.66 |
| ILMN_1776395 | ARMC4     | 0.06  | 6.32  | 2.57  | 0.0116184 | 0.046115  | -3.66 |

|              |           |       |       |       |           |           |       |
|--------------|-----------|-------|-------|-------|-----------|-----------|-------|
| ILMN_2317348 | APTX      | -0.10 | 8.45  | -2.57 | 0.011628  | 0.0461479 | -3.66 |
| ILMN_2048982 | ZBTB25    | 0.08  | 6.84  | 2.57  | 0.0116553 | 0.046251  | -3.66 |
| ILMN_1762436 | UBB       | -0.12 | 12.39 | -2.57 | 0.0116589 | 0.04626   | -3.66 |
| ILMN_2396148 | HIP1R     | -0.10 | 6.92  | -2.57 | 0.0116609 | 0.0462625 | -3.66 |
| ILMN_1811836 | DYNC2LI1  | 0.10  | 7.45  | 2.57  | 0.0116891 | 0.046369  | -3.66 |
| ILMN_1727051 | DDX19A    | 0.09  | 7.12  | 2.57  | 0.0117096 | 0.046445  | -3.66 |
| ILMN_2061310 | ZNF280C   | 0.09  | 7.16  | 2.57  | 0.0117144 | 0.0464587 | -3.67 |
| ILMN_1729188 | HAMP      | 0.08  | 6.51  | 2.57  | 0.0117239 | 0.046491  | -3.67 |
| ILMN_3247681 | C2orf68   | -0.09 | 7.08  | -2.57 | 0.0117409 | 0.0465529 | -3.67 |
| ILMN_1776047 | HSP90AB3P | 0.12  | 7.33  | 2.57  | 0.0117483 | 0.0465557 | -3.66 |
| ILMN_1780769 | TUBB4B    | -0.16 | 10.29 | -2.57 | 0.0117455 | 0.0465557 | -3.67 |
| ILMN_2076602 | ITM2A     | 0.07  | 6.43  | 2.57  | 0.0117483 | 0.0465557 | -3.67 |
| ILMN_2355462 | CYFIP1    | -0.12 | 8.97  | -2.57 | 0.011744  | 0.0465557 | -3.67 |
| ILMN_3209220 | NA        | 0.06  | 6.52  | 2.57  | 0.0117459 | 0.0465557 | -3.67 |
| ILMN_1811719 | MYO7A     | 0.07  | 6.54  | 2.57  | 0.0117515 | 0.0465632 | -3.67 |
| ILMN_1781816 | CHD6      | 0.11  | 6.87  | 2.57  | 0.011757  | 0.0465793 | -3.67 |
| ILMN_1731354 | PARL      | -0.13 | 9.27  | -2.57 | 0.0117629 | 0.0465975 | -3.67 |
| ILMN_2358980 | ILK       | 0.10  | 7.44  | 2.57  | 0.011772  | 0.046628  | -3.67 |
| ILMN_1701551 | ABCA6     | 0.12  | 6.87  | 2.57  | 0.0117937 | 0.0466741 | -3.67 |
| ILMN_1730117 | TMC5      | -0.25 | 8.20  | -2.57 | 0.0117931 | 0.0466741 | -3.67 |
| ILMN_1735680 | TMEM30A   | 0.11  | 8.04  | 2.57  | 0.0117907 | 0.0466741 | -3.67 |
| ILMN_1751464 | TNFSF9    | 0.11  | 6.63  | 2.57  | 0.0117906 | 0.0466741 | -3.66 |
| ILMN_1785198 | POLE3     | 0.11  | 9.57  | 2.57  | 0.0117944 | 0.0466741 | -3.67 |
| ILMN_1814044 | CABIN1    | -0.09 | 7.13  | -2.57 | 0.0117866 | 0.0466741 | -3.67 |
| ILMN_1850842 | NA        | 0.07  | 6.37  | 2.57  | 0.0117917 | 0.0466741 | -3.67 |
| ILMN_3263393 | OR7E156P  | -0.08 | 6.48  | -2.57 | 0.0117924 | 0.0466741 | -3.67 |
| ILMN_2256953 | CASZ1     | -0.11 | 6.80  | -2.57 | 0.0118071 | 0.0467187 | -3.67 |
| ILMN_1662557 | MAP7D3    | 0.08  | 6.62  | 2.57  | 0.0118138 | 0.0467399 | -3.67 |
| ILMN_1753498 | COASY     | -0.12 | 9.26  | -2.57 | 0.0118249 | 0.0467786 | -3.67 |
| ILMN_2056074 | NA        | 0.10  | 6.60  | 2.57  | 0.011834  | 0.0468092 | -3.67 |
| ILMN_1787567 | TSC22D1   | 0.13  | 10.88 | 2.56  | 0.0118386 | 0.046822  | -3.67 |
| ILMN_1784031 | TIMM44    | -0.09 | 6.88  | -2.56 | 0.0118479 | 0.0468532 | -3.68 |
| ILMN_3258955 | COL6A5    | 0.10  | 6.53  | 2.56  | 0.0118801 | 0.0469753 | -3.68 |
| ILMN_1732410 | SLC16A9   | -0.38 | 9.17  | -2.56 | 0.0118853 | 0.0469906 | -3.68 |
| ILMN_1844919 | NA        | 0.07  | 6.48  | 2.56  | 0.0118903 | 0.0470051 | -3.68 |
| ILMN_1808379 | PLCD4     | 0.06  | 6.41  | 2.56  | 0.0118935 | 0.0470121 | -3.68 |
| ILMN_2154115 | PSD4      | -0.11 | 7.43  | -2.56 | 0.0119115 | 0.0470726 | -3.68 |
| ILMN_2367707 | PKN1      | 0.09  | 6.77  | 2.56  | 0.0119104 | 0.0470726 | -3.68 |
| ILMN_1815033 | HPCA      | -0.05 | 6.46  | -2.56 | 0.0119187 | 0.0470955 | -3.68 |
| ILMN_3309864 | MIR449B   | -0.07 | 6.37  | -2.56 | 0.0119435 | 0.047188  | -3.68 |
| ILMN_1796113 | BCDIN3D   | -0.09 | 7.63  | -2.56 | 0.0119469 | 0.0471948 | -3.68 |
| ILMN_2328433 | NOP2      | 0.11  | 6.90  | 2.56  | 0.0119479 | 0.0471948 | -3.68 |
| ILMN_2370160 | HERC4     | 0.10  | 6.93  | 2.56  | 0.0119534 | 0.0472112 | -3.68 |
| ILMN_1753279 | HNRNPA0   | 0.12  | 9.37  | 2.56  | 0.0119565 | 0.0472178 | -3.68 |
| ILMN_3241921 | GLRA4     | -0.07 | 6.43  | -2.56 | 0.0119698 | 0.0472651 | -3.68 |
| ILMN_3237884 | LINC01096 | -0.07 | 6.40  | -2.56 | 0.0119785 | 0.0472938 | -3.68 |
| ILMN_1756408 | PARVA     | 0.11  | 7.43  | 2.56  | 0.0119975 | 0.047358  | -3.69 |
| ILMN_3307992 | MIR656    | -0.07 | 6.36  | -2.56 | 0.0119961 | 0.047358  | -3.69 |

|              |           |       |       |       |           |           |       |
|--------------|-----------|-------|-------|-------|-----------|-----------|-------|
| ILMN_1691849 | LIN7C     | -0.10 | 6.81  | -2.56 | 0.0120101 | 0.0474024 | -3.68 |
| ILMN_1723895 | GTF3C5    | -0.12 | 7.44  | -2.56 | 0.0120188 | 0.0474315 | -3.69 |
| ILMN_1714730 | UBE2C     | 0.23  | 8.07  | 2.56  | 0.0120295 | 0.0474681 | -3.69 |
| ILMN_1765060 | FBXO34    | -0.14 | 8.87  | -2.56 | 0.0120374 | 0.0474941 | -3.69 |
| ILMN_1761797 | CSTB      | 0.19  | 10.92 | 2.56  | 0.0120545 | 0.0475544 | -3.69 |
| ILMN_2112256 | TNFRSF4   | 0.18  | 7.11  | 2.56  | 0.0120555 | 0.0475544 | -3.69 |
| ILMN_1733799 | FAM195B   | 0.09  | 6.90  | 2.56  | 0.0120637 | 0.0475813 | -3.69 |
| ILMN_2113126 | RNASE3    | 0.07  | 6.26  | 2.56  | 0.0120712 | 0.0476053 | -3.69 |
| ILMN_1694323 | GLE1      | -0.08 | 6.69  | -2.56 | 0.012086  | 0.0476583 | -3.69 |
| ILMN_1694730 | RNPEPL1   | -0.08 | 6.85  | -2.56 | 0.0120925 | 0.0476785 | -3.69 |
| ILMN_1789467 | VMAC      | -0.08 | 6.36  | -2.56 | 0.0121021 | 0.0477107 | -3.69 |
| ILMN_2202423 | HELLS     | 0.09  | 6.79  | 2.56  | 0.0121078 | 0.0477277 | -3.69 |
| ILMN_1652989 | NUP160    | 0.12  | 8.33  | 2.56  | 0.0121116 | 0.0477376 | -3.69 |
| ILMN_2372398 | ALDH5A1   | -0.15 | 7.65  | -2.56 | 0.0121219 | 0.0477727 | -3.70 |
| ILMN_2381121 | UQCC1     | -0.08 | 7.08  | -2.56 | 0.0121331 | 0.0478112 | -3.70 |
| ILMN_1743995 | ALG12     | -0.07 | 6.72  | -2.56 | 0.0121513 | 0.0478775 | -3.70 |
| ILMN_2052871 | TMEM116   | -0.11 | 7.17  | -2.56 | 0.0121589 | 0.0479019 | -3.69 |
| ILMN_1825822 | NA        | -0.07 | 6.46  | -2.55 | 0.0121893 | 0.0480164 | -3.70 |
| ILMN_1664466 | KLHL9     | -0.12 | 8.92  | -2.55 | 0.0122123 | 0.0481015 | -3.70 |
| ILMN_1748427 | ZNF239    | 0.11  | 7.05  | 2.55  | 0.0122245 | 0.0481437 | -3.70 |
| ILMN_1703617 | AHSA1     | -0.12 | 8.36  | -2.55 | 0.0122274 | 0.04815   | -3.70 |
| ILMN_1778132 | C2CD2L    | -0.09 | 6.62  | -2.55 | 0.0122296 | 0.048153  | -3.70 |
| ILMN_3247064 | SNRNP40   | 0.11  | 8.38  | 2.55  | 0.0122326 | 0.0481591 | -3.70 |
| ILMN_1726990 | DXO       | 0.09  | 7.05  | 2.55  | 0.0122376 | 0.0481735 | -3.70 |
| ILMN_2358647 | FBXO21    | 0.09  | 7.51  | 2.55  | 0.0122495 | 0.0482149 | -3.70 |
| ILMN_1656662 | RPL24     | 0.10  | 11.98 | 2.55  | 0.0122535 | 0.0482253 | -3.71 |
| ILMN_1661595 | C1orf53   | -0.14 | 7.52  | -2.55 | 0.0122753 | 0.0483054 | -3.71 |
| ILMN_1717887 | GOLGA7B   | 0.07  | 6.34  | 2.55  | 0.0122802 | 0.0483189 | -3.71 |
| ILMN_2038776 | TXN       | -0.12 | 12.82 | -2.55 | 0.0122982 | 0.0483845 | -3.71 |
| ILMN_1802190 | FOXJ1     | 0.09  | 6.48  | 2.55  | 0.0123054 | 0.0484074 | -3.71 |
| ILMN_1797025 | NA        | -0.08 | 6.68  | -2.55 | 0.012324  | 0.0484749 | -3.71 |
| ILMN_1701681 | SEC11C    | 0.20  | 10.45 | 2.55  | 0.0123297 | 0.0484874 | -3.71 |
| ILMN_1782954 | UBE2K     | -0.11 | 8.58  | -2.55 | 0.01233   | 0.0484874 | -3.71 |
| ILMN_3228822 | NEMP1     | 0.11  | 7.75  | 2.55  | 0.0123322 | 0.048488  | -3.71 |
| ILMN_3249583 | POM121L1P | 0.08  | 6.47  | 2.55  | 0.012333  | 0.048488  | -3.71 |
| ILMN_1698367 | CD84      | 0.13  | 6.93  | 2.55  | 0.0123395 | 0.0485081 | -3.71 |
| ILMN_1795937 | EZR       | 0.17  | 11.79 | 2.55  | 0.0123434 | 0.0485179 | -3.71 |
| ILMN_2327947 | SLC25A25  | 0.09  | 6.68  | 2.55  | 0.0123466 | 0.0485251 | -3.71 |
| ILMN_3238889 | RPRD2     | -0.11 | 7.88  | -2.55 | 0.0123715 | 0.0486172 | -3.71 |
| ILMN_2316173 | AP1S1     | -0.17 | 7.82  | -2.55 | 0.0123779 | 0.0486369 | -3.71 |
| ILMN_1724704 | GRIPAP1   | -0.07 | 6.68  | -2.55 | 0.0123803 | 0.0486409 | -3.71 |
| ILMN_1728984 | PA2G4     | 0.13  | 8.77  | 2.55  | 0.0123975 | 0.048703  | -3.72 |
| ILMN_1799860 | PIGM      | -0.09 | 8.22  | -2.55 | 0.0124174 | 0.0487755 | -3.72 |
| ILMN_3253579 | HAUS8     | -0.08 | 6.81  | -2.55 | 0.0124239 | 0.0487955 | -3.72 |
| ILMN_1786628 | CNTNAP3B  | -0.09 | 6.64  | -2.55 | 0.0124317 | 0.0488206 | -3.72 |
| ILMN_1736729 | OAS2      | 0.10  | 6.56  | 2.55  | 0.012434  | 0.0488239 | -3.72 |
| ILMN_3247261 | RAPGEF2   | -0.09 | 8.75  | -2.55 | 0.0124396 | 0.0488404 | -3.72 |
| ILMN_1777168 | CSRP2BP   | -0.06 | 6.47  | -2.55 | 0.0124481 | 0.0488684 | -3.72 |

|              |           |       |       |       |           |           |       |
|--------------|-----------|-------|-------|-------|-----------|-----------|-------|
| ILMN_1711439 | EMILIN1   | 0.11  | 6.86  | 2.55  | 0.0124608 | 0.0489015 | -3.72 |
| ILMN_1742250 | CCNH      | 0.10  | 7.18  | 2.55  | 0.0124601 | 0.0489015 | -3.72 |
| ILMN_1881865 | NA        | -0.12 | 6.70  | -2.55 | 0.0124587 | 0.0489015 | -3.72 |
| ILMN_1780799 | ENPP2     | 0.23  | 8.04  | 2.55  | 0.0124627 | 0.0489031 | -3.72 |
| ILMN_1776213 | RGMB      | -0.23 | 7.56  | -2.55 | 0.0124681 | 0.0489187 | -3.72 |
| ILMN_1751636 | ANKS3     | -0.08 | 6.64  | -2.55 | 0.0124698 | 0.0489199 | -3.72 |
| ILMN_3244029 | ANKRD52   | -0.07 | 6.70  | -2.55 | 0.0124788 | 0.0489498 | -3.72 |
| ILMN_1791951 | KRTAP13-2 | -0.13 | 6.58  | -2.54 | 0.0124956 | 0.0490101 | -3.72 |
| ILMN_1693878 | GMPPA     | 0.08  | 6.50  | 2.54  | 0.0125047 | 0.04904   | -3.72 |
| ILMN_1732300 | POLR2C    | -0.09 | 7.53  | -2.54 | 0.012507  | 0.0490435 | -3.72 |
| ILMN_1727458 | HDAC1     | -0.12 | 11.22 | -2.54 | 0.0125245 | 0.0491065 | -3.72 |
| ILMN_1687351 | ANKRA2    | -0.11 | 8.18  | -2.54 | 0.0125292 | 0.0491137 | -3.72 |
| ILMN_1699172 | AFG3L1P   | -0.06 | 6.42  | -2.54 | 0.012528  | 0.0491137 | -3.72 |
| ILMN_1794729 | KRT20     | -0.32 | 11.23 | -2.54 | 0.0125362 | 0.0491357 | -3.73 |
| ILMN_1753518 | NA        | 0.18  | 6.69  | 2.54  | 0.0125416 | 0.0491511 | -3.73 |
| ILMN_1665714 | C4orf22   | -0.07 | 6.47  | -2.54 | 0.0125476 | 0.0491692 | -3.73 |
| ILMN_1892859 | ONECUT2   | 0.17  | 6.58  | 2.54  | 0.0125539 | 0.0491885 | -3.73 |
| ILMN_1664691 | DAPP1     | 0.09  | 6.64  | 2.54  | 0.0125717 | 0.0492525 | -3.73 |
| ILMN_1681543 | RHBDD1    | 0.09  | 7.19  | 2.54  | 0.0125993 | 0.0493515 | -3.73 |
| ILMN_1703279 | CXorf57   | 0.09  | 6.72  | 2.54  | 0.0125998 | 0.0493515 | -3.73 |
| ILMN_1796962 | PPP3R1    | 0.15  | 8.83  | 2.54  | 0.0126207 | 0.0494277 | -3.73 |
| ILMN_1798379 | NTM       | 0.09  | 6.61  | 2.54  | 0.0126699 | 0.0496147 | -3.73 |
| ILMN_2099528 | BTLA      | 0.10  | 6.60  | 2.54  | 0.0126789 | 0.0496443 | -3.74 |
| ILMN_2096747 | SNORA33   | 0.10  | 6.95  | 2.54  | 0.0126871 | 0.0496706 | -3.74 |
| ILMN_1666050 | TMUB1     | -0.13 | 8.08  | -2.54 | 0.0127081 | 0.0497416 | -3.74 |
| ILMN_1815652 | NA        | 0.24  | 6.84  | 2.54  | 0.0127077 | 0.0497416 | -3.74 |
| ILMN_1666593 | NA        | -0.07 | 6.42  | -2.54 | 0.0127151 | 0.0497576 | -3.74 |
| ILMN_1787949 | RPS15A    | 0.14  | 12.89 | 2.54  | 0.012714  | 0.0497576 | -3.74 |
| ILMN_1702972 | GJA5      | 0.07  | 6.44  | 2.54  | 0.0127344 | 0.0498232 | -3.74 |
| ILMN_1780825 | RRAS      | 0.18  | 8.92  | 2.54  | 0.0127347 | 0.0498232 | -3.73 |
| ILMN_1651628 | EXOC6     | 0.10  | 7.98  | 2.54  | 0.0127434 | 0.0498509 | -3.74 |
| ILMN_1677959 | NA        | 0.07  | 6.35  | 2.54  | 0.0127447 | 0.0498509 | -3.74 |
| ILMN_3245287 | SCN5A     | -0.10 | 6.91  | -2.54 | 0.0127529 | 0.0498775 | -3.74 |
| ILMN_1658717 | DEPDC5    | -0.07 | 6.91  | -2.54 | 0.0127661 | 0.0499231 | -3.74 |
| ILMN_2305116 | CTH       | -0.07 | 6.65  | -2.54 | 0.0127675 | 0.0499231 | -3.74 |
| ILMN_1701025 | EPHX1     | -0.11 | 7.35  | -2.54 | 0.0127697 | 0.0499261 | -3.74 |
| ILMN_1657682 | GFM1      | -0.15 | 8.96  | -2.54 | 0.0127827 | 0.0499708 | -3.74 |
| ILMN_2372639 | TRAPPC5   | -0.13 | 8.37  | -2.54 | 0.012784  | 0.0499708 | -3.74 |
| ILMN_1693088 | SDC4P     | -0.07 | 6.45  | -2.54 | 0.0127896 | 0.049987  | -3.74 |
| ILMN_1773380 | UNC13D    | 0.10  | 6.82  | 2.54  | 0.0128018 | 0.0500258 | -3.74 |
| ILMN_2141452 | RPL18A    | 0.09  | 13.01 | 2.54  | 0.0128025 | 0.0500258 | -3.74 |
| ILMN_1739497 | GTF2H5    | 0.10  | 9.24  | 2.54  | 0.0128187 | 0.0500837 | -3.74 |
| ILMN_1667199 | SQRDL     | -0.19 | 8.46  | -2.53 | 0.0128325 | 0.0501316 | -3.75 |
| ILMN_1760245 | TMEM42    | -0.08 | 7.46  | -2.53 | 0.0128439 | 0.0501701 | -3.75 |
| ILMN_2126832 | SEC24A    | 0.14  | 7.48  | 2.53  | 0.0128452 | 0.0501701 | -3.75 |
| ILMN_2282077 | MIB2      | -0.12 | 7.34  | -2.53 | 0.0128467 | 0.0501701 | -3.75 |
| ILMN_3262217 | NA        | -0.08 | 6.37  | -2.53 | 0.012853  | 0.0501893 | -3.75 |
| ILMN_1798212 | LLGL1     | 0.11  | 7.44  | 2.53  | 0.012855  | 0.0501913 | -3.75 |



|              |           |       |       |       |           |           |       |
|--------------|-----------|-------|-------|-------|-----------|-----------|-------|
| ILMN_1802096 | ABTB1     | 0.13  | 7.64  | 2.53  | 0.0128992 | 0.0503582 | -3.75 |
| ILMN_2204526 | TCTEX1D4  | -0.06 | 6.46  | -2.53 | 0.0129066 | 0.0503813 | -3.75 |
| ILMN_3223798 | ZNF84     | -0.10 | 7.05  | -2.53 | 0.0129097 | 0.0503879 | -3.75 |
| ILMN_1682100 | IGSF10    | 0.07  | 6.48  | 2.53  | 0.012925  | 0.0504416 | -3.75 |
| ILMN_1773751 | HRAS      | -0.10 | 7.36  | -2.53 | 0.0129463 | 0.050519  | -3.75 |
| ILMN_1672547 | MYO9B     | 0.12  | 7.77  | 2.53  | 0.0129495 | 0.050526  | -3.75 |
| ILMN_1809141 | ING4      | -0.09 | 6.83  | -2.53 | 0.0129549 | 0.0505414 | -3.75 |
| ILMN_1677793 | NA        | 0.08  | 6.39  | 2.53  | 0.0129626 | 0.0505597 | -3.76 |
| ILMN_1792168 | GALE      | -0.17 | 8.62  | -2.53 | 0.0129622 | 0.0505597 | -3.76 |
| ILMN_1789136 | NA        | -0.13 | 11.45 | -2.53 | 0.0129667 | 0.0505703 | -3.76 |
| ILMN_1791396 | NA        | -0.12 | 8.10  | -2.53 | 0.0129769 | 0.0506042 | -3.76 |
| ILMN_1652085 | MPHOSPH1C | 0.11  | 8.33  | 2.53  | 0.0129796 | 0.0506089 | -3.76 |
| ILMN_1700109 | PTOV1     | -0.11 | 9.07  | -2.53 | 0.0129878 | 0.0506237 | -3.76 |
| ILMN_1703415 | NA        | -0.07 | 6.50  | -2.53 | 0.0129872 | 0.0506237 | -3.76 |
| ILMN_1770020 | PPIL3     | 0.14  | 9.66  | 2.53  | 0.0129861 | 0.0506237 | -3.76 |
| ILMN_1791568 | CEP57     | 0.08  | 6.82  | 2.53  | 0.0130005 | 0.0506675 | -3.76 |
| ILMN_1678087 | MAP3K4    | 0.09  | 8.15  | 2.53  | 0.0130107 | 0.0506957 | -3.76 |
| ILMN_1688625 | AIM1      | -0.10 | 7.17  | -2.53 | 0.0130094 | 0.0506957 | -3.76 |
| ILMN_1779685 | ASIC2     | -0.07 | 6.35  | -2.53 | 0.0130198 | 0.0507256 | -3.76 |
| ILMN_1790978 | ATG7      | 0.11  | 7.62  | 2.53  | 0.0130238 | 0.0507353 | -3.75 |
| ILMN_1715947 | NA        | 0.22  | 10.23 | 2.53  | 0.0130299 | 0.0507535 | -3.76 |
| ILMN_3245020 | WASH1     | -0.13 | 7.18  | -2.53 | 0.0130317 | 0.0507546 | -3.75 |
| ILMN_1760563 | PRRC2A    | 0.11  | 7.61  | 2.53  | 0.0130411 | 0.0507856 | -3.76 |
| ILMN_1718177 | CYP20A1   | 0.10  | 7.79  | 2.53  | 0.0130709 | 0.0508959 | -3.76 |
| ILMN_1753729 | KNG1      | -0.09 | 6.46  | -2.53 | 0.0130834 | 0.0509386 | -3.76 |
| ILMN_1687002 | OSR2      | 0.07  | 6.35  | 2.53  | 0.0130865 | 0.0509402 | -3.76 |
| ILMN_2369286 | NME7      | 0.07  | 6.63  | 2.53  | 0.0130867 | 0.0509402 | -3.76 |
| ILMN_1652434 | MTHFD2L   | 0.08  | 6.81  | 2.53  | 0.0130885 | 0.0509414 | -3.76 |
| ILMN_3268717 | LOC146880 | 0.08  | 6.65  | 2.53  | 0.0130919 | 0.0509489 | -3.76 |
| ILMN_1683129 | CCNL1     | 0.10  | 7.19  | 2.53  | 0.0130988 | 0.0509585 | -3.76 |
| ILMN_2302075 | MSI2      | 0.06  | 6.32  | 2.53  | 0.0130959 | 0.0509585 | -3.76 |
| ILMN_2405009 | NA        | -0.16 | 10.12 | -2.53 | 0.0130983 | 0.0509585 | -3.76 |
| ILMN_3187210 | NA        | 0.08  | 6.48  | 2.53  | 0.0131031 | 0.0509695 | -3.76 |
| ILMN_2051469 | E2F1      | 0.09  | 6.71  | 2.53  | 0.0131066 | 0.0509772 | -3.76 |
| ILMN_1751444 | NCAPG     | 0.19  | 7.64  | 2.53  | 0.0131244 | 0.0510407 | -3.77 |
| ILMN_2331525 | PRKD2     | 0.07  | 6.73  | 2.53  | 0.0131543 | 0.0511514 | -3.77 |
| ILMN_1757910 | HIP1R     | -0.08 | 6.62  | -2.53 | 0.0131588 | 0.0511632 | -3.77 |
| ILMN_3225634 | NA        | 0.10  | 12.24 | 2.53  | 0.0131606 | 0.0511644 | -3.77 |
| ILMN_1787879 | ARL2      | -0.11 | 9.13  | -2.53 | 0.0131701 | 0.0511954 | -3.77 |
| ILMN_1800619 | BRI3BP    | -0.10 | 7.14  | -2.52 | 0.013194  | 0.0512826 | -3.77 |
| ILMN_1714774 | TRIM71    | -0.06 | 6.36  | -2.52 | 0.0132121 | 0.0513472 | -3.77 |
| ILMN_1792885 | CTSC      | 0.28  | 8.27  | 2.52  | 0.0132143 | 0.0513497 | -3.77 |
| ILMN_1702385 | LILRA4    | -0.08 | 6.44  | -2.52 | 0.0132174 | 0.0513524 | -3.77 |
| ILMN_1776870 | ESPNP     | -0.10 | 6.53  | -2.52 | 0.0132179 | 0.0513524 | -3.77 |
| ILMN_2135232 | SRSF3     | 0.06  | 6.53  | 2.52  | 0.0132314 | 0.0513989 | -3.77 |
| ILMN_2309180 | SMARCD3   | 0.08  | 6.85  | 2.52  | 0.0132352 | 0.0514079 | -3.77 |
| ILMN_1725014 | TMPRSS6   | -0.07 | 6.42  | -2.52 | 0.0132795 | 0.0515688 | -3.78 |
| ILMN_2382724 | METTL23   | 0.12  | 8.12  | 2.52  | 0.0132796 | 0.0515688 | -3.78 |

|              |          |       |       |       |           |           |       |
|--------------|----------|-------|-------|-------|-----------|-----------|-------|
| ILMN_3253471 | KLHL29   | 0.08  | 6.55  | 2.52  | 0.0132883 | 0.0515969 | -3.78 |
| ILMN_1815205 | LYZ      | 0.64  | 10.49 | 2.52  | 0.0132914 | 0.0516028 | -3.78 |
| ILMN_1724959 | SEC31A   | 0.11  | 8.50  | 2.52  | 0.0132999 | 0.0516242 | -3.78 |
| ILMN_2338038 | AK4      | -0.18 | 7.55  | -2.52 | 0.0132988 | 0.0516242 | -3.78 |
| ILMN_1786039 | RNF34    | -0.09 | 9.11  | -2.52 | 0.0133093 | 0.0516491 | -3.78 |
| ILMN_2053527 | PARP9    | 0.16  | 7.44  | 2.52  | 0.0133084 | 0.0516491 | -3.78 |
| ILMN_1788895 | SRD5A2   | -0.07 | 6.45  | -2.52 | 0.0133177 | 0.0516761 | -3.77 |
| ILMN_1766195 | ZNF558   | -0.09 | 7.24  | -2.52 | 0.0133247 | 0.0516971 | -3.78 |
| ILMN_1673708 | HDAC9    | 0.06  | 6.30  | 2.52  | 0.0133341 | 0.0517238 | -3.78 |
| ILMN_1737320 | ZDHHC15  | 0.08  | 6.31  | 2.52  | 0.0133335 | 0.0517238 | -3.78 |
| ILMN_2352216 | FBXL6    | -0.14 | 7.42  | -2.52 | 0.0133336 | 0.0517238 | -3.78 |
| ILMN_1672743 | ZNF334   | -0.10 | 6.64  | -2.52 | 0.0133676 | 0.0518404 | -3.78 |
| ILMN_1747744 | LHFPL2   | 0.19  | 8.92  | 2.52  | 0.0133714 | 0.0518495 | -3.78 |
| ILMN_2365023 | C9orf24  | -0.11 | 6.76  | -2.52 | 0.0133857 | 0.0518988 | -3.78 |
| ILMN_1801516 | GPC1     | 0.08  | 6.61  | 2.52  | 0.0133922 | 0.0519182 | -3.78 |
| ILMN_1730294 | INO80C   | -0.13 | 8.02  | -2.52 | 0.0134056 | 0.0519584 | -3.78 |
| ILMN_2406313 | RBCK1    | -0.09 | 7.34  | -2.52 | 0.0134054 | 0.0519584 | -3.78 |
| ILMN_1794956 | BBS9     | 0.07  | 6.82  | 2.52  | 0.01341   | 0.0519698 | -3.79 |
| ILMN_1656297 | YBEY     | -0.12 | 6.92  | -2.52 | 0.0134152 | 0.0519781 | -3.79 |
| ILMN_1755658 | ABI3     | 0.11  | 6.93  | 2.52  | 0.0134145 | 0.0519781 | -3.79 |
| ILMN_1739428 | IFIT2    | -0.27 | 7.64  | -2.52 | 0.0134244 | 0.0520079 | -3.78 |
| ILMN_1673941 | RBM24    | -0.13 | 6.69  | -2.52 | 0.0134313 | 0.0520291 | -3.79 |
| ILMN_1694847 | TERF1    | -0.14 | 7.70  | -2.52 | 0.0134375 | 0.0520472 | -3.79 |
| ILMN_1693987 | MLXIP    | -0.06 | 6.43  | -2.52 | 0.0134399 | 0.0520507 | -3.79 |
| ILMN_1661646 | BANK1    | 0.16  | 6.78  | 2.52  | 0.0134539 | 0.052099  | -3.79 |
| ILMN_1717745 | TIAL1    | 0.11  | 7.45  | 2.52  | 0.0134586 | 0.0521115 | -3.79 |
| ILMN_1695317 | RCBTB1   | 0.06  | 6.49  | 2.52  | 0.0135176 | 0.052334  | -3.79 |
| ILMN_2363634 | ADHFE1   | -0.11 | 6.81  | -2.52 | 0.0135264 | 0.052362  | -3.79 |
| ILMN_2249288 | TIPRL    | -0.11 | 7.25  | -2.52 | 0.013528  | 0.0523622 | -3.79 |
| ILMN_2398926 | C17orf58 | -0.10 | 8.51  | -2.51 | 0.0135391 | 0.0523984 | -3.79 |
| ILMN_3249645 | HSPA13   | 0.09  | 6.64  | 2.51  | 0.0135404 | 0.0523984 | -3.79 |
| ILMN_1712754 | NFKBIB   | -0.08 | 7.17  | -2.51 | 0.0135731 | 0.0525194 | -3.80 |
| ILMN_2357062 | IL1RAP   | 0.08  | 6.45  | 2.51  | 0.0135798 | 0.0525391 | -3.80 |
| ILMN_1901532 | NA       | -0.08 | 6.66  | -2.51 | 0.0135877 | 0.0525638 | -3.79 |
| ILMN_1689446 | EIF3G    | 0.12  | 9.37  | 2.51  | 0.0136016 | 0.0526117 | -3.80 |
| ILMN_1803302 | CRK      | -0.12 | 8.24  | -2.51 | 0.0136227 | 0.0526825 | -3.80 |
| ILMN_1881909 | NA       | -0.31 | 7.47  | -2.51 | 0.0136229 | 0.0526825 | -3.80 |
| ILMN_3248008 | TUBB     | 0.06  | 6.42  | 2.51  | 0.0136312 | 0.0527087 | -3.80 |
| ILMN_1852041 | NA       | -0.07 | 6.48  | -2.51 | 0.0136346 | 0.0527159 | -3.80 |
| ILMN_1836218 | PP7080   | -0.66 | 8.65  | -2.51 | 0.013642  | 0.0527383 | -3.80 |
| ILMN_1748352 | CTSV     | 0.26  | 7.36  | 2.51  | 0.0136618 | 0.0528084 | -3.80 |
| ILMN_1780659 | NUDT6    | -0.09 | 6.75  | -2.51 | 0.0136632 | 0.0528084 | -3.80 |
| ILMN_2209163 | CHD6     | 0.08  | 6.95  | 2.51  | 0.0136795 | 0.0528658 | -3.80 |
| ILMN_1721842 | RYBP     | 0.11  | 9.06  | 2.51  | 0.0136831 | 0.0528735 | -3.80 |
| ILMN_2248589 | DHX40    | 0.10  | 8.40  | 2.51  | 0.0136966 | 0.05292   | -3.80 |
| ILMN_2145250 | NACAP1   | 0.11  | 7.19  | 2.51  | 0.0137042 | 0.0529434 | -3.80 |
| ILMN_1803376 | AEBP2    | 0.10  | 7.27  | 2.51  | 0.0137073 | 0.0529495 | -3.80 |
| ILMN_1676799 | MFAP1    | -0.09 | 7.92  | -2.51 | 0.0137275 | 0.0530215 | -3.81 |

|              |           |       |       |       |           |           |       |
|--------------|-----------|-------|-------|-------|-----------|-----------|-------|
| ILMN_1772489 | NEMF      | -0.09 | 7.52  | -2.51 | 0.0137574 | 0.053119  | -3.81 |
| ILMN_1782070 | NPL       | 0.16  | 7.45  | 2.51  | 0.0137556 | 0.053119  | -3.81 |
| ILMN_1791890 | SPON1     | -0.24 | 10.02 | -2.51 | 0.0137565 | 0.053119  | -3.80 |
| ILMN_2119937 | NDUFB3    | -0.14 | 11.13 | -2.51 | 0.0137778 | 0.0531918 | -3.81 |
| ILMN_1671076 | ADGRB3    | 0.09  | 6.57  | 2.51  | 0.0137967 | 0.0532589 | -3.81 |
| ILMN_1809963 | RSAD1     | -0.09 | 7.22  | -2.51 | 0.0138175 | 0.0533334 | -3.81 |
| ILMN_1801090 | KRT222    | 0.08  | 6.43  | 2.51  | 0.0138324 | 0.0533847 | -3.81 |
| ILMN_1725633 | MACROD2   | -0.06 | 6.31  | -2.51 | 0.0138453 | 0.0534227 | -3.81 |
| ILMN_1764628 | LYPLA2    | -0.09 | 7.27  | -2.51 | 0.0138448 | 0.0534227 | -3.81 |
| ILMN_1690818 | AKAP5     | -0.07 | 6.39  | -2.51 | 0.013861  | 0.053474  | -3.81 |
| ILMN_1772163 | PRKY      | 0.19  | 6.95  | 2.51  | 0.0138617 | 0.053474  | -3.81 |
| ILMN_1673605 | PRSS57    | 0.07  | 6.43  | 2.51  | 0.0138653 | 0.0534819 | -3.81 |
| ILMN_1680844 | NA        | -0.06 | 6.39  | -2.51 | 0.0138778 | 0.0535239 | -3.82 |
| ILMN_1801889 | MYO16     | 0.07  | 6.47  | 2.51  | 0.0138796 | 0.0535248 | -3.80 |
| ILMN_1653466 | HES4      | 0.17  | 8.44  | 2.51  | 0.0138811 | 0.0535249 | -3.82 |
| ILMN_2309156 | PMEPA1    | 0.13  | 7.60  | 2.51  | 0.0138855 | 0.0535358 | -3.82 |
| ILMN_1703314 | KLHL36    | 0.09  | 7.70  | 2.51  | 0.0138905 | 0.0535431 | -3.82 |
| ILMN_1770824 | ARHGAP4   | 0.19  | 7.64  | 2.51  | 0.0138895 | 0.0535431 | -3.82 |
| ILMN_1772458 | SPAG6     | 0.06  | 6.39  | 2.51  | 0.0138923 | 0.0535439 | -3.82 |
| ILMN_2373791 | ENPP2     | 0.23  | 8.29  | 2.50  | 0.0139111 | 0.0536084 | -3.82 |
| ILMN_3304505 | NA        | -0.07 | 6.36  | -2.50 | 0.0139121 | 0.0536084 | -3.81 |
| ILMN_2166865 | ENY2      | 0.11  | 9.69  | 2.50  | 0.013918  | 0.053625  | -3.82 |
| ILMN_2109156 | RANBP1    | 0.13  | 9.53  | 2.50  | 0.013941  | 0.0537076 | -3.82 |
| ILMN_3306672 | PATL2     | 0.10  | 6.75  | 2.50  | 0.0139561 | 0.0537597 | -3.82 |
| ILMN_1741171 | TM2D2     | 0.08  | 7.14  | 2.50  | 0.013968  | 0.0537998 | -3.82 |
| ILMN_2183424 | TPTE2P6   | -0.09 | 6.54  | -2.50 | 0.0139751 | 0.0538211 | -3.82 |
| ILMN_1794233 | LINC-PINT | 0.10  | 6.68  | 2.50  | 0.0139915 | 0.053878  | -3.82 |
| ILMN_2327974 | CORO2A    | -0.12 | 6.99  | -2.50 | 0.0139935 | 0.0538799 | -3.82 |
| ILMN_2061950 | RABGAP1   | 0.13  | 9.16  | 2.50  | 0.014008  | 0.0539297 | -3.82 |
| ILMN_1676241 | NA        | -0.09 | 7.10  | -2.50 | 0.0140138 | 0.0539397 | -3.82 |
| ILMN_1678052 | C19orf24  | -0.08 | 7.14  | -2.50 | 0.0140128 | 0.0539397 | -3.82 |
| ILMN_1679483 | INTS10    | 0.09  | 8.52  | 2.50  | 0.0140174 | 0.0539477 | -3.82 |
| ILMN_1665219 | LTBP4     | 0.14  | 8.63  | 2.50  | 0.0140191 | 0.0539481 | -3.82 |
| ILMN_1780827 | EPS8L2    | -0.07 | 6.55  | -2.50 | 0.0140346 | 0.0539959 | -3.83 |
| ILMN_1795678 | POLR3C    | 0.09  | 8.32  | 2.50  | 0.0140339 | 0.0539959 | -3.82 |
| ILMN_1793830 | NA        | -0.08 | 6.47  | -2.50 | 0.0140428 | 0.0540214 | -3.83 |
| ILMN_1786612 | PSME2     | 0.17  | 10.48 | 2.50  | 0.014066  | 0.0541046 | -3.83 |
| ILMN_1721563 | TMEM127   | -0.11 | 7.36  | -2.50 | 0.0140739 | 0.0541289 | -3.82 |
| ILMN_1779225 | C7orf33   | 0.06  | 6.24  | 2.50  | 0.01408   | 0.0541463 | -3.83 |
| ILMN_1766094 | MOSPD2    | 0.12  | 7.50  | 2.50  | 0.0140817 | 0.054147  | -3.83 |
| ILMN_1725220 | FER1L5    | -0.07 | 6.45  | -2.50 | 0.0140862 | 0.0541582 | -3.83 |
| ILMN_1785404 | FGFBP1    | -0.32 | 8.48  | -2.50 | 0.0140953 | 0.0541871 | -3.83 |
| ILMN_1706326 | MRPL33    | 0.13  | 10.64 | 2.50  | 0.0140991 | 0.0541957 | -3.83 |
| ILMN_1672149 | CHCHD1    | -0.08 | 7.20  | -2.50 | 0.0141017 | 0.0541996 | -3.83 |
| ILMN_1737685 | CRLS1     | -0.10 | 9.62  | -2.50 | 0.0141043 | 0.0542036 | -3.83 |
| ILMN_1744508 | FAM53C    | 0.12  | 7.88  | 2.50  | 0.0141077 | 0.0542107 | -3.83 |
| ILMN_2252813 | TAF5L     | -0.09 | 6.81  | -2.50 | 0.0141156 | 0.0542349 | -3.83 |
| ILMN_1810159 | LVRN      | 0.07  | 6.47  | 2.50  | 0.0141173 | 0.0542355 | -3.82 |

|              |          |       |      |       |           |           |       |
|--------------|----------|-------|------|-------|-----------|-----------|-------|
| ILMN_1756501 | ST6GAL1  | 0.24  | 9.69 | 2.50  | 0.0141247 | 0.0542578 | -3.83 |
| ILMN_1787265 | ZNF503   | 0.10  | 7.11 | 2.50  | 0.0141354 | 0.0542928 | -3.83 |
| ILMN_1713006 | CDC34    | -0.10 | 7.27 | -2.50 | 0.0141407 | 0.0543071 | -3.83 |
| ILMN_2043265 | ZNF106   | 0.13  | 8.78 | 2.50  | 0.0141465 | 0.0543233 | -3.83 |
| ILMN_1806601 | GRSF1    | -0.11 | 9.01 | -2.50 | 0.0141558 | 0.054353  | -3.83 |
| ILMN_1769783 | ZDHHC2   | -0.10 | 7.02 | -2.50 | 0.0141776 | 0.0544305 | -3.83 |
| ILMN_1667449 | GCSAM    | 0.10  | 6.60 | 2.50  | 0.0142067 | 0.0545266 | -3.84 |
| ILMN_1681628 | ZNF277   | 0.11  | 8.10 | 2.50  | 0.0142053 | 0.0545266 | -3.84 |
| ILMN_1886515 | NA       | 0.09  | 7.22 | 2.50  | 0.0142073 | 0.0545266 | -3.84 |
| ILMN_1718271 | MTIF3    | -0.12 | 8.85 | -2.50 | 0.014215  | 0.054544  | -3.84 |
| ILMN_2108366 | RBM41    | -0.08 | 6.51 | -2.50 | 0.0142139 | 0.054544  | -3.84 |
| ILMN_1772557 | SLC22A10 | 0.06  | 6.46 | 2.50  | 0.0142465 | 0.0546524 | -3.84 |
| ILMN_1786766 | SNTB2    | 0.09  | 6.89 | 2.50  | 0.014246  | 0.0546524 | -3.84 |
| ILMN_1763842 | PTRH1    | 0.09  | 6.88 | 2.50  | 0.0142602 | 0.054699  | -3.84 |
| ILMN_3243686 | LTN1     | -0.09 | 7.32 | -2.49 | 0.0142699 | 0.0547301 | -3.84 |
| ILMN_1801377 | SLC29A4  | -0.21 | 7.16 | -2.49 | 0.0142719 | 0.0547318 | -3.84 |
| ILMN_1699226 | UBR4     | 0.11  | 9.04 | 2.49  | 0.0142744 | 0.0547354 | -3.84 |
| ILMN_1760037 | ATAT1    | -0.05 | 6.29 | -2.50 | 0.0142786 | 0.0547451 | -3.84 |
| ILMN_1729650 | PEX7     | -0.11 | 7.64 | -2.49 | 0.0142851 | 0.054764  | -3.84 |
| ILMN_1699049 | NA       | -0.08 | 6.85 | -2.49 | 0.0143065 | 0.0548399 | -3.84 |
| ILMN_1767556 | C10orf10 | 0.22  | 7.07 | 2.49  | 0.0143086 | 0.0548418 | -3.84 |
| ILMN_1811029 | TLK1     | -0.10 | 7.76 | -2.49 | 0.014318  | 0.054872  | -3.84 |
| ILMN_1682402 | SNORD46  | 0.11  | 6.70 | 2.49  | 0.0143276 | 0.0549026 | -3.84 |
| ILMN_1796900 | NUDCD3   | -0.08 | 7.44 | -2.49 | 0.014331  | 0.0549096 | -3.84 |
| ILMN_1756860 | TXNL1    | 0.13  | 7.23 | 2.49  | 0.0143355 | 0.0549204 | -3.84 |
| ILMN_2048700 | ATAD2    | 0.15  | 7.17 | 2.49  | 0.0144628 | 0.0553653 | -3.85 |
