# Supplementary material
Source: PubMed Central journal article supplement (PMC5535754)
Supplement: NIHMS884641-supplement-Supplementary_Table_2.pdf [file NIHMS884641-supplement-Supplementary_Table_2.pdf]

**Supplementary Table 2: Up-regulated gene ontology pathways in IBD patients harboring proximal neoplasia using DAVID webtool**

| Category         | Term                                                              | Count | Fold Enrichment | Bonferroni | Benjamini | FDR      |
|------------------|-------------------------------------------------------------------|-------|-----------------|------------|-----------|----------|
| UP_KEYWORDS      | Secreted                                                          | 51    | 4.77            | 3.62E-20   | 3.62E-20  | 2.15E-19 |
| UP_KEYWORDS      | Disulfide bond                                                    | 55    | 2.91            | 2.36E-12   | 1.18E-12  | 1.41E-11 |
| GOTERM_CC_DIRECT | GO:0005576~extracellular region                                   | 38    | 4.16            | 5.21E-12   | 2.60E-12  | 3.97E-11 |
| GOTERM_CC_DIRECT | GO:0005615~extracellular space                                    | 36    | 4.48            | 3.82E-12   | 3.82E-12  | 2.92E-11 |
| GOTERM_CC_DIRECT | GO:0031012~extracellular matrix                                   | 16    | 15.01           | 2.46E-11   | 8.21E-12  | 1.88E-10 |
| UP_SEQ_FEATURE   | disulfide bond                                                    | 50    | 3.04            | 4.26E-11   | 2.13E-11  | 1.13E-10 |
| UP_KEYWORDS      | Signal                                                            | 54    | 2.73            | 6.78E-11   | 2.26E-11  | 4.03E-10 |
| UP_SEQ_FEATURE   | signal peptide                                                    | 54    | 2.86            | 2.39E-11   | 2.39E-11  | 6.36E-11 |
| UP_KEYWORDS      | Extracellular matrix                                              | 15    | 10.39           | 3.63E-08   | 9.07E-09  | 2.16E-07 |
| GOTERM_CC_DIRECT | GO:0005578~proteinaceous extracellular matrix                     | 15    | 9.72            | 6.15E-08   | 1.54E-08  | 4.69E-07 |
| GOTERM_MF_DIRECT | GO:0005201~extracellular matrix structural constituent            | 9     | 26.16           | 3.56E-07   | 3.56E-07  | 2.00E-06 |
| GOTERM_CC_DIRECT | GO:0070062~extracellular exosome                                  | 42    | 2.42            | 4.11E-06   | 8.23E-07  | 3.14E-05 |
| UP_KEYWORDS      | Glycoprotein                                                      | 53    | 2.07            | 5.06E-06   | 1.01E-06  | 3.01E-05 |
| GOTERM_BP_DIRECT | GO:0030198~extracellular matrix organization                      | 15    | 7.42            | 1.35E-05   | 1.35E-05  | 1.95E-05 |
| GOTERM_CC_DIRECT | GO:0005604~basement membrane                                      | 7     | 13.95           | 0.002      | 0.0003    | 0.01     |
| UP_KEYWORDS      | Proteoglycan                                                      | 6     | 21.72           | 0.002      | 0.0003    | 0.01     |
| GOTERM_BP_DIRECT | GO:0030307~positive regulation of cell growth                     | 8     | 15.34           | 0.001      | 0.0005    | 0.001    |
| GOTERM_MF_DIRECT | GO:0008201~heparin binding                                        | 9     | 9.00            | 0.002      | 0.001     | 0.01     |
| UP_KEYWORDS      | EGF-like domain                                                   | 9     | 6.82            | 0.01       | 0.002     | 0.06     |
| UP_KEYWORDS      | Pyrrolidone carboxylic acid                                       | 6     | 13.82           | 0.02       | 0.002     | 0.09     |
| KEGG_PATHWAY     | hsa04510:Focal adhesion                                           | 10    | 6.08            | 0.00       | 0.003     | 0.03     |
| KEGG_PATHWAY     | hsa04512:ECM-receptor interaction                                 | 7     | 10.08           | 0.01       | 0.003     | 0.06     |
| GOTERM_CC_DIRECT | GO:0009986~cell surface                                           | 13    | 3.82            | 0.02       | 0.003     | 0.17     |
| UP_KEYWORDS      | Inflammatory response                                             | 7     | 8.22            | 0.04       | 0.005     | 0.26     |
| UP_KEYWORDS      | S-nitrosylation                                                   | 5     | 16.12           | 0.05       | 0.01      | 0.32     |
| GOTERM_CC_DIRECT | GO:0005796~Golgi lumen                                            | 6     | 10.29           | 0.04       | 0.01      | 0.34     |
| UP_KEYWORDS      | Cell adhesion                                                     | 11    | 4.07            | 0.07       | 0.01      | 0.45     |
| UP_KEYWORDS      | Muscle protein                                                    | 5     | 14.30           | 0.08       | 0.01      | 0.51     |
| SMART            | SM00181:SM00181                                                   | 9     | 5.17            | 0.02       | 0.01      | 0.31     |
| UP_SEQ_FEATURE   | glycosylation site:O-linked (Xyl...) (glycosaminoglycan)          | 4     | 50.73           | 0.03       | 0.01      | 0.09     |
| INTERPRO         | IPR001007: von Willebrand factor, type C                          | 5     | 21.03           | 0.03       | 0.01      | 0.12     |
| INTERPRO         | IPR009030: Insulin-like growth factor binding protein, N-terminal | 7     | 8.97            | 0.04       | 0.01      | 0.17     |
| SMART            | SM00214:SM00214                                                   | 5     | 15.75           | 0.02       | 0.01      | 0.27     |
| UP_SEQ_FEATURE   | glycosylation site:N-linked (GlcNAc...)                           | 43    | 1.80            | 0.03       | 0.01      | 0.07     |
| INTERPRO         | IPR000742: Epidermal growth factor-like domain                    | 9     | 6.42            | 0.02       | 0.01      | 0.10     |
| SMART            | SM00209:SM00209                                                   | 6     | 11.34           | 0.01       | 0.01      | 0.17     |
| SMART            | SM00041:SM00041                                                   | 4     | 22.34           | 0.05       | 0.01      | 0.71     |
| INTERPRO         | IPR000884: Thrombospondin, type 1 repeat                          | 6     | 15.14           | 0.01       | 0.01      | 0.06     |
| UP_SEQ_FEATURE   | domain:VWFC                                                       | 4     | 39.46           | 0.07       | 0.01      | 0.19     |
| INTERPRO         | IPR001134: Netrin domain                                          | 4     | 28.52           | 0.10       | 0.02      | 0.46     |
| GOTERM_MF_DIRECT | GO:0050840~extracellular matrix binding                           | 4     | 30.81           | 0.06       | 0.02      | 0.35     |
| INTERPRO         | IPR008993: Tissue inhibitor of metalloproteinases-like, OB-fold   | 4     | 26.24           | 0.12       | 0.02      | 0.59     |
| INTERPRO         | IPR006207: Cystine knot, C-terminal                               | 4     | 26.24           | 0.12       | 0.02      | 0.59     |
| UP_KEYWORDS      | Heparin-binding                                                   | 5     | 10.43           | 0.25       | 0.02      | 1.66     |
| UP_SEQ_FEATURE   | domain:NTR                                                        | 4     | 32.28           | 0.12       | 0.02      | 0.35     |
| INTERPRO         | IPR016187: C-type lectin fold                                     | 6     | 8.95            | 0.14       | 0.02      | 0.72     |
| UP_SEQ_FEATURE   | domain:CTCK                                                       | 4     | 28.41           | 0.18       | 0.03      | 0.52     |
| UP_KEYWORDS      | Collagen                                                          | 5     | 9.54            | 0.32       | 0.03      | 2.31     |
| GOTERM_BP_DIRECT | GO:0030199~collagen fibril organization                           | 5     | 19.17           | 0.13       | 0.03      | 0.20     |
| GOTERM_BP_DIRECT | GO:0043434~response to peptide hormone                            | 5     | 17.04           | 0.20       | 0.04      | 0.32     |
| UP_KEYWORDS      | Antimicrobial                                                     | 5     | 8.45            | 0.46       | 0.04      | 3.57     |
| GOTERM_BP_DIRECT | GO:0006954~inflammatory response                                  | 11    | 4.69            | 0.12       | 0.04      | 0.18     |
| UP_KEYWORDS      | Calcium                                                           | 13    | 2.66            | 0.51       | 0.04      | 4.17     |
| UP_KEYWORDS      | Immunity                                                          | 9     | 3.58            | 0.53       | 0.04      | 4.44     |
| GOTERM_BP_DIRECT | GO:0042493~response to drug                                       | 10    | 4.69            | 0.26       | 0.04      | 0.43     |
| UP_KEYWORDS      | Sushi                                                             | 4     | 12.67           | 0.56       | 0.04      | 4.70     |
| UP_KEYWORDS      | Innate immunity                                                   | 7     | 4.83            | 0.50       | 0.04      | 4.02     |
| GOTERM_BP_DIRECT | GO:0007229~integrin-mediated signaling pathway                    | 6     | 11.09           | 0.20       | 0.04      | 0.32     |
| INTERPRO         | IPR013032: EGF-like, conserved site                               | 7     | 5.83            | 0.30       | 0.04      | 1.65     |
| GOTERM_MF_DIRECT | GO:0001968~fibronectin binding                                    | 4     | 21.25           | 0.17       | 0.05      | 1.07     |

|                  |                                                                     |    |        |      |      |       |
|------------------|---------------------------------------------------------------------|----|--------|------|------|-------|
| GOTERM_BP_DIRECT | GO:0042346~positive regulation of NF-kappaB import into nucleus     | 4  | 27.89  | 0.34 | 0.05 | 0.59  |
| UP_KEYWORDS      | Protease inhibitor                                                  | 5  | 7.21   | 0.66 | 0.05 | 6.20  |
| UP_KEYWORDS      | Acute phase                                                         | 3  | 28.00  | 0.65 | 0.05 | 6.12  |
| GOTERM_CC_DIRECT | GO:0005925~focal adhesion                                           | 9  | 3.67   | 0.38 | 0.05 | 3.62  |
| UP_KEYWORDS      | Host-virus interaction                                              | 8  | 3.70   | 0.71 | 0.05 | 7.13  |
| UP_SEQ_FEATURE   | domain:EGF-like 4; calcium-binding                                  | 4  | 20.89  | 0.39 | 0.06 | 1.29  |
| INTERPRO         | IPR017891:Insulin-like growth factor binding protein, N-terminal, ( | 3  | 44.73  | 0.43 | 0.06 | 2.52  |
| GOTERM_MF_DIRECT | GO:0005509~calcium ion binding                                      | 13 | 2.93   | 0.28 | 0.06 | 1.84  |
| UP_SEQ_FEATURE   | domain:EGF-like 3; calcium-binding                                  | 4  | 18.69  | 0.49 | 0.07 | 1.79  |
| UP_SEQ_FEATURE   | domain:EGF-like 5; calcium-binding                                  | 4  | 18.69  | 0.49 | 0.07 | 1.79  |
| GOTERM_MF_DIRECT | GO:0050786~RAGE receptor binding                                    | 3  | 42.01  | 0.39 | 0.08 | 2.74  |
| GOTERM_MF_DIRECT | GO:0048407~platelet-derived growth factor binding                   | 3  | 42.01  | 0.39 | 0.08 | 2.74  |
| GOTERM_BP_DIRECT | GO:0072593~reactive oxygen species metabolic process                | 4  | 18.59  | 0.75 | 0.09 | 1.97  |
| GOTERM_BP_DIRECT | GO:0048662~negative regulation of smooth muscle cell proliferati    | 4  | 18.59  | 0.75 | 0.09 | 1.97  |
| GOTERM_BP_DIRECT | GO:0030308~negative regulation of cell growth                       | 6  | 7.54   | 0.73 | 0.09 | 1.85  |
| GOTERM_BP_DIRECT | GO:0022617~extracellular matrix disassembly                         | 6  | 7.67   | 0.70 | 0.09 | 1.72  |
| UP_SEQ_FEATURE   | short sequence motif:Cell attachment site                           | 5  | 9.76   | 0.60 | 0.09 | 2.44  |
| GOTERM_BP_DIRECT | GO:0050832~defense response to fungus                               | 4  | 21.91  | 0.57 | 0.09 | 1.21  |
| GOTERM_BP_DIRECT | GO:0001666~response to hypoxia                                      | 7  | 6.03   | 0.69 | 0.09 | 1.66  |
| INTERPRO         | IPR016186:C-type lectin-like                                        | 5  | 8.04   | 0.63 | 0.09 | 4.43  |
| GOTERM_BP_DIRECT | GO:0007155~cell adhesion                                            | 10 | 3.68   | 0.81 | 0.09 | 2.40  |
| INTERPRO         | IPR001881:EGF-like calcium-binding                                  | 5  | 7.81   | 0.66 | 0.09 | 4.90  |
| SMART            | SM00032:SM00032                                                     | 4  | 8.94   | 0.50 | 0.10 | 9.64  |
| GOTERM_BP_DIRECT | GO:0043589~skin morphogenesis                                       | 3  | 51.13  | 0.80 | 0.10 | 2.29  |
| UP_SEQ_FEATURE   | domain:Sushi 2                                                      | 4  | 15.78  | 0.67 | 0.10 | 2.91  |
| UP_SEQ_FEATURE   | domain:Sushi 1                                                      | 4  | 15.78  | 0.67 | 0.10 | 2.91  |
| GOTERM_BP_DIRECT | GO:0032355~response to estradiol                                    | 6  | 7.80   | 0.67 | 0.10 | 1.59  |
| INTERPRO         | IPR004827:Basic-leucine zipper domain                               | 4  | 12.15  | 0.71 | 0.10 | 5.51  |
| GOTERM_BP_DIRECT | GO:0050873~brown fat cell differentiation                           | 4  | 20.45  | 0.65 | 0.10 | 1.49  |
| SMART            | SM00121:SM00121                                                     | 3  | 20.48  | 0.48 | 0.10 | 8.95  |
| INTERPRO         | IPR000436:Sushi/SCR/CCP                                             | 4  | 11.51  | 0.76 | 0.10 | 6.38  |
| SMART            | SM00338:SM00338                                                     | 4  | 9.45   | 0.45 | 0.11 | 8.31  |
| UP_KEYWORDS      | Hereditary hemolytic anemia                                         | 3  | 17.16  | 0.94 | 0.11 | 15.21 |
| GOTERM_BP_DIRECT | GO:0006953~acute-phase response                                     | 4  | 14.96  | 0.93 | 0.12 | 3.67  |
| INTERPRO         | IPR000867:Insulin-like growth factor-binding protein, IGFBP         | 3  | 24.60  | 0.84 | 0.12 | 8.18  |
| GOTERM_BP_DIRECT | GO:0030514~negative regulation of BMP signaling pathway             | 4  | 14.61  | 0.94 | 0.12 | 3.93  |
| UP_KEYWORDS      | Lectin                                                              | 5  | 5.25   | 0.96 | 0.13 | 17.40 |
| GOTERM_BP_DIRECT | GO:0071305~cellular response to vitamin D                           | 3  | 41.83  | 0.91 | 0.13 | 3.45  |
| UP_KEYWORDS      | Hydroxylation                                                       | 4  | 7.55   | 0.97 | 0.13 | 18.22 |
| GOTERM_BP_DIRECT | GO:0006928~movement of cell or subcellular component                | 5  | 8.92   | 0.92 | 0.13 | 3.66  |
| KEGG_PATHWAY     | hsa04151:PI3K-Akt signaling pathway                                 | 9  | 3.27   | 0.43 | 0.13 | 5.55  |
| KEGG_PATHWAY     | hsa05144:Malaria                                                    | 4  | 10.23  | 0.52 | 0.14 | 7.12  |
| GOTERM_BP_DIRECT | GO:0006898~receptor-mediated endocytosis                            | 6  | 6.05   | 0.97 | 0.14 | 4.78  |
| GOTERM_MF_DIRECT | GO:0005178~integrin binding                                         | 5  | 7.27   | 0.67 | 0.15 | 6.04  |
| KEGG_PATHWAY     | hsa05205:Proteoglycans in cancer                                    | 7  | 4.43   | 0.38 | 0.15 | 4.74  |
| GOTERM_MF_DIRECT | GO:0005539~glycosaminoglycan binding                                | 3  | 25.67  | 0.74 | 0.15 | 7.25  |
| GOTERM_BP_DIRECT | GO:2000811~negative regulation of anoikis                           | 3  | 27.07  | 1.00 | 0.15 | 8.12  |
| UP_SEQ_FEATURE   | domain:Leucine-zipper                                               | 5  | 7.86   | 0.87 | 0.16 | 5.28  |
| GOTERM_BP_DIRECT | GO:0006936~muscle contraction                                       | 5  | 7.24   | 1.00 | 0.16 | 7.61  |
| GOTERM_CC_DIRECT | GO:0043202~lysosomal lumen                                          | 4  | 7.87   | 0.89 | 0.16 | 15.65 |
| GOTERM_BP_DIRECT | GO:0001649~osteoblast differentiation                               | 5  | 7.10   | 1.00 | 0.16 | 8.11  |
| GOTERM_BP_DIRECT | GO:0051591~response to cAMP                                         | 4  | 11.36  | 1.00 | 0.16 | 7.88  |
| GOTERM_BP_DIRECT | GO:0050727~regulation of inflammatory response                      | 4  | 11.36  | 1.00 | 0.16 | 7.88  |
| GOTERM_BP_DIRECT | GO:0030207~chondroitin sulfate catabolic process                    | 3  | 32.87  | 0.98 | 0.16 | 5.57  |
| GOTERM_BP_DIRECT | GO:0007568~aging                                                    | 6  | 5.48   | 0.99 | 0.16 | 7.23  |
| GOTERM_BP_DIRECT | GO:0042542~response to hydrogen peroxide                            | 4  | 11.58  | 1.00 | 0.16 | 7.49  |
| GOTERM_BP_DIRECT | GO:0010628~positive regulation of gene expression                   | 7  | 4.63   | 0.99 | 0.16 | 6.13  |
| GOTERM_BP_DIRECT | GO:0090303~positive regulation of wound healing                     | 3  | 30.68  | 0.99 | 0.16 | 6.38  |
| INTERPRO         | IPR026823:Complement Clr-like EGF domain                            | 3  | 20.50  | 0.93 | 0.16 | 11.50 |
| GOTERM_BP_DIRECT | GO:0045087~innate immune response                                   | 14 | 2.43   | 0.99 | 0.16 | 6.94  |
| GOTERM_CC_DIRECT | GO:0005584~collagen type I trimer                                   | 2  | 159.47 | 0.86 | 0.16 | 13.95 |
| INTERPRO         | IPR001751:S100/Calbindin-D9k, conserved site                        | 3  | 19.68  | 0.94 | 0.16 | 12.39 |

|                  |                                                                     |    |        |      |      |       |
|------------------|---------------------------------------------------------------------|----|--------|------|------|-------|
| GOTERM_BP_DIRECT | GO:0014002~astrocyte development                                    | 3  | 28.76  | 0.99 | 0.16 | 7.23  |
| GOTERM_BP_DIRECT | GO:0070373~negative regulation of ERK1 and ERK2 cascade             | 4  | 12.03  | 0.99 | 0.16 | 6.75  |
| UP_KEYWORDS      | Polymorphism                                                        | 79 | 1.17   | 0.99 | 0.16 | 24.30 |
| GOTERM_BP_DIRECT | GO:0071230~cellular response to amino acid stimulus                 | 4  | 12.52  | 0.99 | 0.17 | 6.05  |
| GOTERM_CC_DIRECT | GO:0030133~transport vesicle                                        | 4  | 8.50   | 0.84 | 0.17 | 12.91 |
| GOTERM_BP_DIRECT | GO:0007267~cell-cell signaling                                      | 7  | 4.26   | 1.00 | 0.17 | 9.00  |
| GOTERM_MF_DIRECT | GO:0004601~peroxidase activity                                      | 3  | 23.11  | 0.81 | 0.17 | 8.86  |
| INTERPRO         | IPR013787:S100/CaBP-9k-type, calcium binding, subdomain             | 3  | 18.22  | 0.96 | 0.17 | 14.25 |
| GOTERM_CC_DIRECT | GO:0031410~cytoplasmic vesicle                                      | 5  | 5.35   | 0.89 | 0.17 | 15.61 |
| INTERPRO         | IPR008160:Collagen triple helix repeat                              | 4  | 8.63   | 0.96 | 0.17 | 13.62 |
| GOTERM_BP_DIRECT | GO:0009612~response to mechanical stimulus                          | 4  | 10.58  | 1.00 | 0.17 | 9.54  |
| GOTERM_BP_DIRECT | GO:0007165~signal transduction                                      | 15 | 2.22   | 1.00 | 0.18 | 10.27 |
| GOTERM_BP_DIRECT | GO:0031668~cellular response to extracellular stimulus              | 3  | 24.22  | 1.00 | 0.18 | 10.03 |
| GOTERM_BP_DIRECT | GO:0030203~glycosaminoglycan metabolic process                      | 5  | 6.50   | 1.00 | 0.18 | 10.90 |
| BIOCARTA         | h_slrpPathway:Small Leucine-rich Proteoglycan (SLRP) molecules      | 3  | 32.54  | 0.18 | 0.18 | 3.05  |
| GOTERM_CC_DIRECT | GO:0042383~sarcolemma                                               | 4  | 6.93   | 0.96 | 0.19 | 21.28 |
| UP_SEQ_FEATURE   | calcium-binding region:1; low affinity                              | 3  | 28.04  | 0.93 | 0.19 | 7.00  |
| GOTERM_CC_DIRECT | GO:0005589~collagen type VI trimer                                  | 2  | 106.31 | 0.95 | 0.19 | 20.18 |
| UP_SEQ_FEATURE   | region of interest:Heparin-binding                                  | 3  | 26.63  | 0.95 | 0.19 | 7.72  |
| UP_SEQ_FEATURE   | domain:IGFBP N-terminal                                             | 3  | 26.63  | 0.95 | 0.19 | 7.72  |
| UP_SEQ_FEATURE   | domain:TSP type-1                                                   | 3  | 25.37  | 0.96 | 0.20 | 8.47  |
| UP_SEQ_FEATURE   | calcium-binding region:2; high affinity                             | 3  | 24.21  | 0.97 | 0.20 | 9.25  |
| GOTERM_BP_DIRECT | GO:0007613~memory                                                   | 4  | 9.44   | 1.00 | 0.21 | 12.86 |
| UP_SEQ_FEATURE   | region of interest:Triple-helical region                            | 3  | 23.16  | 0.98 | 0.21 | 10.05 |
| GOTERM_MF_DIRECT | GO:0001618~virus receptor activity                                  | 4  | 8.80   | 0.91 | 0.21 | 12.48 |
| PIR_SUPERFAMILY  | PIRSF000939:dual specificity protein phosphatase (MAP kinase ph     | 2  | 23.71  | 0.70 | 0.22 | 42.95 |
| GOTERM_CC_DIRECT | GO:0031838~haptoglobin-hemoglobin complex                           | 2  | 79.73  | 0.98 | 0.22 | 25.95 |
| GOTERM_BP_DIRECT | GO:0008217~regulation of blood pressure                             | 4  | 9.16   | 1.00 | 0.22 | 13.90 |
| INTERPRO         | IPR001304:C-type lectin                                             | 4  | 7.45   | 0.99 | 0.22 | 19.55 |
| GOTERM_BP_DIRECT | GO:0001816~cytokine production                                      | 3  | 20.01  | 1.00 | 0.22 | 14.27 |
| INTERPRO         | IPR003410:Hyalin                                                    | 2  | 109.34 | 0.99 | 0.22 | 21.45 |
| INTERPRO         | IPR016352:Small leucine-rich proteoglycan, class I, decorin/asporn  | 2  | 109.34 | 0.99 | 0.22 | 21.45 |
| UP_KEYWORDS      | Disease mutation                                                    | 22 | 1.58   | 1.00 | 0.22 | 33.11 |
| GOTERM_BP_DIRECT | GO:0008284~positive regulation of cell proliferation                | 9  | 2.99   | 1.00 | 0.22 | 14.87 |
| UP_KEYWORDS      | Congenital generalized lipodystrophy                                | 2  | 59.12  | 1.00 | 0.23 | 34.68 |
| PIR_SUPERFAMILY  | PIRSF001875:alpha-defensin                                          | 2  | 27.67  | 0.65 | 0.23 | 38.18 |
| INTERPRO         | IPR000566:Lipocalin/cytosolic fatty-acid binding protein domain     | 3  | 14.47  | 0.99 | 0.23 | 21.32 |
| INTERPRO         | IPR018097:EGF-like calcium-binding, conserved site                  | 4  | 6.76   | 1.00 | 0.23 | 24.56 |
| INTERPRO         | IPR027465:Proteinase inhibitor I35, tissue inhibitor of metalloprot | 2  | 82.00  | 1.00 | 0.24 | 27.53 |
| INTERPRO         | IPR001820:Proteinase inhibitor I35, tissue inhibitor of metalloprot | 2  | 82.00  | 1.00 | 0.24 | 27.53 |
| INTERPRO         | IPR016468:CCAAT/enhancer-binding                                    | 2  | 82.00  | 1.00 | 0.24 | 27.53 |
| INTERPRO         | IPR000152:EGF-type aspartate/asparagine hydroxylation site          | 4  | 6.50   | 1.00 | 0.24 | 26.91 |
| SMART            | SM00034:SM00034                                                     | 4  | 5.58   | 0.91 | 0.24 | 29.94 |
| GOTERM_BP_DIRECT | GO:0010951~negative regulation of endopeptidase activity            | 5  | 5.72   | 1.00 | 0.24 | 16.39 |
| INTERPRO         | IPR012674:Calycin                                                   | 3  | 13.30  | 1.00 | 0.24 | 24.56 |
| UP_SEQ_FEATURE   | domain:Anaphylatoxin-like 2                                         | 2  | 177.56 | 1.00 | 0.24 | 15.07 |
| UP_SEQ_FEATURE   | domain:Anaphylatoxin-like 1                                         | 2  | 177.56 | 1.00 | 0.24 | 15.07 |
| UP_SEQ_FEATURE   | domain:Anaphylatoxin-like 3                                         | 2  | 177.56 | 1.00 | 0.24 | 15.07 |
| UP_SEQ_FEATURE   | domain:EGF-like 6; calcium-binding                                  | 3  | 20.49  | 0.99 | 0.25 | 12.61 |
| INTERPRO         | IPR011038:Calycin-like                                              | 3  | 12.62  | 1.00 | 0.25 | 26.76 |
| UP_SEQ_FEATURE   | domain:C-type lectin                                                | 4  | 8.66   | 1.00 | 0.25 | 14.77 |
| GOTERM_BP_DIRECT | GO:0000188~inactivation of MAPK activity                            | 3  | 17.04  | 1.00 | 0.25 | 18.98 |
| PIR_SUPERFAMILY  | PIRSF036495:IGFBP-related protein, CNN type                         | 2  | 33.20  | 0.58 | 0.25 | 33.01 |
| GOTERM_BP_DIRECT | GO:0001558~regulation of cell growth                                | 4  | 8.29   | 1.00 | 0.25 | 17.82 |
| SMART            | SM00206:SM00206                                                     | 2  | 61.43  | 0.90 | 0.25 | 28.53 |
| GOTERM_BP_DIRECT | GO:0043065~positive regulation of apoptotic process                 | 7  | 3.59   | 1.00 | 0.25 | 18.90 |
| UP_SEQ_FEATURE   | domain:EGF-like 7; calcium-binding                                  | 3  | 19.02  | 1.00 | 0.25 | 14.42 |
| GOTERM_BP_DIRECT | GO:0046851~negative regulation of bone remodeling                   | 2  | 153.38 | 1.00 | 0.25 | 18.74 |
| GOTERM_BP_DIRECT | GO:0032602~chemokine production                                     | 2  | 153.38 | 1.00 | 0.25 | 18.74 |
| GOTERM_BP_DIRECT | GO:2000041~negative regulation of planar cell polarity pathway ir   | 2  | 153.38 | 1.00 | 0.25 | 18.74 |
| GOTERM_BP_DIRECT | GO:0070488~neutrophil aggregation                                   | 2  | 153.38 | 1.00 | 0.25 | 18.74 |
| GOTERM_BP_DIRECT | GO:0042060~wound healing                                            | 4  | 8.18   | 1.00 | 0.25 | 18.42 |

|                  |                                                                    |    |        |      |      |       |
|------------------|--------------------------------------------------------------------|----|--------|------|------|-------|
| GOTERM_BP_DIRECT | GO:0030574~collagen catabolic process                              | 4  | 8.18   | 1.00 | 0.25 | 18.42 |
| GOTERM_BP_DIRECT | GO:0044344~cellular response to fibroblast growth factor stimulu:  | 3  | 17.70  | 1.00 | 0.26 | 17.76 |
| UP_SEQ_FEATURE   | domain:EGF-like                                                    | 4  | 8.88   | 1.00 | 0.26 | 13.87 |
| GOTERM_BP_DIRECT | GO:0043066~negative regulation of apoptotic process                | 9  | 2.83   | 1.00 | 0.26 | 19.87 |
| GOTERM_BP_DIRECT | GO:0001525~angiogenesis                                            | 6  | 4.18   | 1.00 | 0.26 | 20.28 |
| GOTERM_BP_DIRECT | GO:0051384~response to glucocorticoid                              | 4  | 7.77   | 1.00 | 0.26 | 20.88 |
| GOTERM_CC_DIRECT | GO:0031093~platelet alpha granule lumen                            | 3  | 9.97   | 1.00 | 0.26 | 35.60 |
| GOTERM_BP_DIRECT | GO:0071260~cellular response to mechanical stimulus                | 4  | 7.67   | 1.00 | 0.26 | 21.52 |
| GOTERM_CC_DIRECT | GO:0005788~endoplasmic reticulum lumen                             | 5  | 4.13   | 0.99 | 0.26 | 32.74 |
| INTERPRO         | IPR012395:IGFBP-related, CNN                                       | 2  | 65.60  | 1.00 | 0.27 | 33.13 |
| INTERPRO         | IPR018378:C-type lectin, conserved site                            | 3  | 11.18  | 1.00 | 0.27 | 32.37 |
| GOTERM_CC_DIRECT | GO:0005829~cytosol                                                 | 29 | 1.44   | 1.00 | 0.27 | 35.08 |
| UP_SEQ_FEATURE   | repeat:LRR 12                                                      | 4  | 7.89   | 1.00 | 0.28 | 18.58 |
| UP_SEQ_FEATURE   | domain:Sushi 3                                                     | 3  | 16.65  | 1.00 | 0.28 | 18.27 |
| SMART            | SM00179:SM00179                                                    | 4  | 4.91   | 0.97 | 0.29 | 38.94 |
| PIR_SUPERFAMILY  | PIRSF005879:CCAAT/enhancer-binding protein                         | 2  | 41.50  | 0.50 | 0.29 | 27.42 |
| INTERPRO         | IPR006081:Mammalian defensins                                      | 2  | 54.67  | 1.00 | 0.30 | 38.31 |
| INTERPRO         | IPR016327:Alpha-defensin                                           | 2  | 54.67  | 1.00 | 0.30 | 38.31 |
| INTERPRO         | IPR025155:WxxW domain                                              | 2  | 54.67  | 1.00 | 0.30 | 38.31 |
| INTERPRO         | IPR002366:Defensin propeptide                                      | 2  | 54.67  | 1.00 | 0.30 | 38.31 |
| GOTERM_BP_DIRECT | GO:2001244~positive regulation of intrinsic apoptotic signaling pa | 3  | 14.38  | 1.00 | 0.30 | 25.32 |
| SMART            | SM00104:SM00104                                                    | 2  | 35.10  | 0.98 | 0.31 | 44.45 |
| UP_KEYWORDS      | Host cell receptor for virus entry                                 | 3  | 8.31   | 1.00 | 0.31 | 47.67 |
| GOTERM_BP_DIRECT | GO:0044691~tooth eruption                                          | 2  | 102.26 | 1.00 | 0.32 | 26.75 |
| GOTERM_CC_DIRECT | GO:0043005~neuron projection                                       | 5  | 3.62   | 1.00 | 0.32 | 45.02 |
| GOTERM_BP_DIRECT | GO:0007517~muscle organ development                                | 4  | 6.82   | 1.00 | 0.33 | 28.24 |
| UP_KEYWORDS      | Prostaglandin biosynthesis                                         | 2  | 35.47  | 1.00 | 0.33 | 50.83 |
| UP_KEYWORDS      | Metalloprotease inhibitor                                          | 2  | 35.47  | 1.00 | 0.33 | 50.83 |
| GOTERM_MF_DIRECT | GO:0031720~haptoglobin binding                                     | 2  | 102.70 | 0.99 | 0.33 | 21.95 |
| INTERPRO         | IPR000020:Anaphylatoxin/fibulin                                    | 2  | 46.86  | 1.00 | 0.33 | 43.08 |
| UP_SEQ_FEATURE   | repeat:LRR 11                                                      | 4  | 7.03   | 1.00 | 0.34 | 24.41 |
| UP_KEYWORDS      | Prostaglandin metabolism                                           | 2  | 32.25  | 1.00 | 0.35 | 54.20 |
| UP_KEYWORDS      | Metalloenzyme inhibitor                                            | 2  | 32.25  | 1.00 | 0.35 | 54.20 |
| GOTERM_CC_DIRECT | GO:0072562~blood microparticle                                     | 4  | 4.52   | 1.00 | 0.35 | 51.15 |
| GOTERM_BP_DIRECT | GO:0043407~negative regulation of MAP kinase activity              | 3  | 12.78  | 1.00 | 0.35 | 30.62 |
| GOTERM_MF_DIRECT | GO:0005516~calmodulin binding                                      | 5  | 4.33   | 1.00 | 0.35 | 30.39 |
| KEGG_PATHWAY     | hsa04974:Protein digestion and absorption                          | 4  | 5.76   | 0.97 | 0.35 | 29.50 |
| UP_KEYWORDS      | Actin-binding                                                      | 5  | 3.32   | 1.00 | 0.35 | 56.05 |
| GOTERM_MF_DIRECT | GO:0050544~arachidonic acid binding                                | 2  | 61.62  | 1.00 | 0.35 | 33.84 |
| UP_KEYWORDS      | Complement alternate pathway                                       | 2  | 29.56  | 1.00 | 0.35 | 57.34 |
| UP_KEYWORDS      | Glycation                                                          | 2  | 29.56  | 1.00 | 0.35 | 57.34 |
| KEGG_PATHWAY     | hsa05206:MicroRNAs in cancer                                       | 7  | 3.08   | 0.93 | 0.35 | 23.34 |
| GOTERM_CC_DIRECT | GO:0005811~lipid particle                                          | 3  | 7.72   | 1.00 | 0.36 | 50.61 |
| KEGG_PATHWAY     | hsa05143:African trypanosomiasis                                   | 3  | 11.39  | 0.95 | 0.36 | 26.89 |
| UP_KEYWORDS      | Fungicide                                                          | 2  | 27.29  | 1.00 | 0.36 | 60.26 |
| UP_KEYWORDS      | Oxygen transport                                                   | 2  | 27.29  | 1.00 | 0.36 | 60.26 |
| UP_KEYWORDS      | Phosphoprotein                                                     | 51 | 1.21   | 1.00 | 0.36 | 59.40 |
| GOTERM_MF_DIRECT | GO:0004867~serine-type endopeptidase inhibitor activity            | 4  | 6.49   | 1.00 | 0.36 | 26.10 |
| GOTERM_CC_DIRECT | GO:0005901~caveola                                                 | 3  | 6.93   | 1.00 | 0.36 | 57.54 |
| GOTERM_MF_DIRECT | GO:0005515~protein binding                                         | 67 | 1.19   | 1.00 | 0.36 | 33.26 |
| GOTERM_MF_DIRECT | GO:0008307~structural constituent of muscle                        | 3  | 11.55  | 1.00 | 0.36 | 29.81 |
| INTERPRO         | IPR002345:Lipocalin                                                | 2  | 41.00  | 1.00 | 0.36 | 47.48 |
| GOTERM_CC_DIRECT | GO:0030666~endocytic vesicle membrane                              | 3  | 7.25   | 1.00 | 0.36 | 54.63 |
| GOTERM_MF_DIRECT | GO:0035662~Toll-like receptor 4 binding                            | 2  | 77.02  | 1.00 | 0.36 | 28.14 |
| GOTERM_CC_DIRECT | GO:0005833~hemoglobin complex                                      | 2  | 26.58  | 1.00 | 0.37 | 59.41 |
| GOTERM_BP_DIRECT | GO:0010811~positive regulation of cell-substrate adhesion          | 3  | 12.11  | 1.00 | 0.37 | 33.30 |
| GOTERM_BP_DIRECT | GO:0046426~negative regulation of JAK-STAT cascade                 | 3  | 12.11  | 1.00 | 0.37 | 33.30 |
| GOTERM_CC_DIRECT | GO:0005856~cytoskeleton                                            | 6  | 2.73   | 1.00 | 0.37 | 57.16 |
| GOTERM_BP_DIRECT | GO:0005975~carbohydrate metabolic process                          | 7  | 3.10   | 1.00 | 0.37 | 33.02 |
| UP_KEYWORDS      | Ehlers-Danlos syndrome                                             | 2  | 25.34  | 1.00 | 0.37 | 62.98 |
| GOTERM_BP_DIRECT | GO:0070459~prolactin secretion                                     | 2  | 76.69  | 1.00 | 0.37 | 33.97 |
| GOTERM_BP_DIRECT | GO:0045629~negative regulation of T-helper 2 cell differentiation  | 2  | 76.69  | 1.00 | 0.37 | 33.97 |

|                  |                                                                    |    |       |      |      |       |
|------------------|--------------------------------------------------------------------|----|-------|------|------|-------|
| GOTERM_BP_DIRECT | GO:0032119~sequestering of zinc ion                                | 2  | 76.69 | 1.00 | 0.37 | 33.97 |
| GOTERM_BP_DIRECT | GO:0002793~positive regulation of peptide secretion                | 2  | 76.69 | 1.00 | 0.37 | 33.97 |
| GOTERM_CC_DIRECT | GO:0030141~secretory granule                                       | 3  | 6.38  | 1.00 | 0.37 | 63.03 |
| UP_KEYWORDS      | Serine protease inhibitor                                          | 3  | 6.26  | 1.00 | 0.37 | 66.13 |
| UP_KEYWORDS      | Pyruvate                                                           | 2  | 23.65 | 1.00 | 0.38 | 65.52 |
| UP_SEQ_FEATURE   | metal ion-binding site:Zinc; via amide nitrogen and carbonyl oxyge | 2  | 88.78 | 1.00 | 0.38 | 27.86 |
| UP_SEQ_FEATURE   | region of interest:Involved in metalloproteinase-binding           | 2  | 88.78 | 1.00 | 0.38 | 27.86 |
| GOTERM_CC_DIRECT | GO:0005737~cytoplasm                                               | 38 | 1.26  | 1.00 | 0.38 | 62.18 |
| UP_KEYWORDS      | Apoptosis                                                          | 7  | 2.32  | 1.00 | 0.38 | 65.28 |
| SMART            | SM00048:SM00048                                                    | 2  | 24.57 | 1.00 | 0.38 | 56.83 |
| GOTERM_MF_DIRECT | GO:0043184~vascular endothelial growth factor receptor 2 bindin    | 2  | 51.35 | 1.00 | 0.39 | 39.08 |
| INTERPRO         | IPR000837:Fos transforming protein                                 | 2  | 36.45 | 1.00 | 0.39 | 51.54 |
| GOTERM_BP_DIRECT | GO:0032570~response to progesterone                                | 3  | 11.50 | 1.00 | 0.39 | 35.99 |
| SMART            | SM00038:SM00038                                                    | 2  | 22.34 | 1.00 | 0.39 | 60.31 |
| UP_KEYWORDS      | Growth factor binding                                              | 2  | 19.71 | 1.00 | 0.40 | 72.14 |
| UP_KEYWORDS      | Cytoplasm                                                          | 34 | 1.27  | 1.00 | 0.40 | 71.48 |
| PIR_SUPERFAMILY  | PIRSF002490:class I small leucine-rich proteoglycan, decorin/aspo  | 2  | 55.33 | 0.40 | 0.40 | 21.36 |
| UP_KEYWORDS      | Deafness                                                           | 4  | 3.68  | 1.00 | 0.41 | 71.31 |
| INTERPRO         | IPR006080:Beta defensin/Neutrophil defensin                        | 2  | 32.80 | 1.00 | 0.41 | 55.29 |
| INTERPRO         | IPR008343:Mitogen-activated protein (MAP) kinase phosphatase       | 2  | 32.80 | 1.00 | 0.41 | 55.29 |
| GOTERM_BP_DIRECT | GO:0032870~cellular response to hormone stimulus                   | 3  | 10.96 | 1.00 | 0.41 | 38.68 |
| UP_SEQ_FEATURE   | domain:TSP type-1 1                                                | 3  | 11.84 | 1.00 | 0.42 | 32.06 |
| UP_SEQ_FEATURE   | site:Reactive bond                                                 | 3  | 11.84 | 1.00 | 0.42 | 32.06 |
| UP_SEQ_FEATURE   | domain:TSP type-1 2                                                | 3  | 11.84 | 1.00 | 0.42 | 32.06 |
| UP_SEQ_FEATURE   | repeat:LRR 10                                                      | 4  | 6.12  | 1.00 | 0.42 | 33.14 |
| GOTERM_CC_DIRECT | GO:0071682~endocytic vesicle lumen                                 | 2  | 19.93 | 1.00 | 0.42 | 69.95 |
| GOTERM_CC_DIRECT | GO:0032982~myosin filament                                         | 2  | 19.93 | 1.00 | 0.42 | 69.95 |
| GOTERM_BP_DIRECT | GO:0045766~positive regulation of angiogenesis                     | 4  | 5.68  | 1.00 | 0.42 | 41.39 |
| GOTERM_BP_DIRECT | GO:0060355~positive regulation of cell adhesion molecule produc    | 2  | 61.35 | 1.00 | 0.42 | 40.48 |
| GOTERM_BP_DIRECT | GO:0019731~antibacterial humoral response                          | 3  | 10.70 | 1.00 | 0.42 | 40.02 |
| GOTERM_BP_DIRECT | GO:0007566~embryo implantation                                     | 3  | 10.70 | 1.00 | 0.42 | 40.02 |
| GOTERM_BP_DIRECT | GO:0045429~positive regulation of nitric oxide biosynthetic proce: | 3  | 10.46 | 1.00 | 0.42 | 41.36 |
| GOTERM_BP_DIRECT | GO:0045600~positive regulation of fat cell differentiation         | 3  | 10.46 | 1.00 | 0.42 | 41.36 |
| INTERPRO         | IPR000885:Fibrillar collagen, C-terminal                           | 2  | 29.82 | 1.00 | 0.43 | 58.75 |
| UP_SEQ_FEATURE   | domain:EGF-like 1                                                  | 4  | 5.92  | 1.00 | 0.43 | 35.58 |
| KEGG_PATHWAY     | hsa05146:Amoebiasis                                                | 4  | 4.73  | 1.00 | 0.44 | 44.00 |
| GOTERM_BP_DIRECT | GO:0035556~intracellular signal transduction                       | 7  | 2.84  | 1.00 | 0.44 | 44.26 |
| GOTERM_BP_DIRECT | GO:0009267~cellular response to starvation                         | 3  | 10.00 | 1.00 | 0.44 | 44.01 |
| INTERPRO         | IPR022272:Lipocalin conserved site                                 | 2  | 27.33 | 1.00 | 0.45 | 61.94 |
| GOTERM_BP_DIRECT | GO:0031394~positive regulation of prostaglandin biosynthetic pro   | 2  | 51.13 | 1.00 | 0.46 | 46.34 |
| GOTERM_BP_DIRECT | GO:0019800~peptide cross-linking via chondroitin 4-sulfate glycos  | 2  | 51.13 | 1.00 | 0.46 | 46.34 |
| GOTERM_BP_DIRECT | GO:0060056~mammary gland involution                                | 2  | 51.13 | 1.00 | 0.46 | 46.34 |
| GOTERM_BP_DIRECT | GO:0048553~negative regulation of metalloenzyme activity           | 2  | 51.13 | 1.00 | 0.46 | 46.34 |
| GOTERM_BP_DIRECT | GO:0051045~negative regulation of membrane protein ectodoma        | 2  | 51.13 | 1.00 | 0.46 | 46.34 |
| UP_SEQ_FEATURE   | propeptide:N-terminal propeptide                                   | 2  | 59.19 | 1.00 | 0.46 | 38.73 |
| GOTERM_BP_DIRECT | GO:0007596~blood coagulation                                       | 8  | 2.49  | 1.00 | 0.46 | 48.16 |
| GOTERM_BP_DIRECT | GO:0050900~leukocyte migration                                     | 4  | 5.29  | 1.00 | 0.46 | 47.35 |
| GOTERM_BP_DIRECT | GO:0071560~cellular response to transforming growth factor beta    | 3  | 9.39  | 1.00 | 0.46 | 47.91 |
| GOTERM_BP_DIRECT | GO:0030204~chondroitin sulfate metabolic process                   | 3  | 9.39  | 1.00 | 0.46 | 47.91 |
| KEGG_PATHWAY     | hsa04668:TNF signaling pathway                                     | 4  | 4.77  | 1.00 | 0.46 | 43.23 |
| INTERPRO         | IPR000971:Globin                                                   | 2  | 25.23 | 1.00 | 0.47 | 64.89 |
| INTERPRO         | IPR009050:Globin-like                                              | 2  | 25.23 | 1.00 | 0.47 | 64.89 |
| INTERPRO         | IPR012292:Globin, structural domain                                | 2  | 23.43 | 1.00 | 0.48 | 67.61 |
| GOTERM_BP_DIRECT | GO:0014012~peripheral nervous system axon regeneration             | 2  | 43.82 | 1.00 | 0.48 | 51.63 |
| GOTERM_BP_DIRECT | GO:0030213~hyaluronan biosynthetic process                         | 2  | 43.82 | 1.00 | 0.48 | 51.63 |
| GOTERM_BP_DIRECT | GO:0060452~positive regulation of cardiac muscle contraction       | 2  | 43.82 | 1.00 | 0.48 | 51.63 |
| GOTERM_BP_DIRECT | GO:0071481~cellular response to X-ray                              | 2  | 43.82 | 1.00 | 0.48 | 51.63 |
| UP_SEQ_FEATURE   | repeat:LRR 9                                                       | 4  | 5.30  | 1.00 | 0.49 | 44.21 |
| GOTERM_MF_DIRECT | GO:0016504~peptidase activator activity                            | 2  | 30.81 | 1.00 | 0.49 | 56.23 |
| UP_SEQ_FEATURE   | sequence variant                                                   | 80 | 1.14  | 1.00 | 0.49 | 42.46 |
| GOTERM_BP_DIRECT | GO:0008285~negative regulation of cell proliferation               | 7  | 2.70  | 1.00 | 0.49 | 51.53 |
| UP_SEQ_FEATURE   | site:Not glycosylated                                              | 2  | 50.73 | 1.00 | 0.49 | 43.54 |

|                  |                                                                    |    |       |      |      |       |
|------------------|--------------------------------------------------------------------|----|-------|------|------|-------|
| GOTERM_BP_DIRECT | GO:0044281~small molecule metabolic process                        | 18 | 1.62  | 1.00 | 0.49 | 53.13 |
| UP_SEQ_FEATURE   | domain:EGF-like 2; calcium-binding                                 | 3  | 9.18  | 1.00 | 0.50 | 46.26 |
| GOTERM_MF_DIRECT | GO:0005518~collagen binding                                        | 3  | 7.34  | 1.00 | 0.50 | 55.99 |
| UP_SEQ_FEATURE   | propeptide:C-terminal propeptide                                   | 2  | 44.39 | 1.00 | 0.50 | 47.97 |
| GOTERM_MF_DIRECT | GO:0008289~lipid binding                                           | 4  | 4.43  | 1.00 | 0.51 | 55.02 |
| GOTERM_BP_DIRECT | GO:0071407~cellular response to organic cyclic compound            | 3  | 8.07  | 1.00 | 0.51 | 57.77 |
| GOTERM_BP_DIRECT | GO:0030168~platelet activation                                     | 5  | 3.53  | 1.00 | 0.52 | 57.55 |
| GOTERM_BP_DIRECT | GO:0006006~glucose metabolic process                               | 4  | 4.76  | 1.00 | 0.52 | 56.78 |
| GOTERM_BP_DIRECT | GO:0051092~positive regulation of NF-kappaB transcription factor   | 4  | 4.72  | 1.00 | 0.52 | 57.48 |
| GOTERM_BP_DIRECT | GO:0050680~negative regulation of epithelial cell proliferation    | 3  | 8.22  | 1.00 | 0.52 | 56.59 |
| GOTERM_BP_DIRECT | GO:0009611~response to wounding                                    | 3  | 7.93  | 1.00 | 0.52 | 58.93 |
| INTERPRO         | IPR015526:Frizzled/secreted frizzled-related protein               | 2  | 20.50 | 1.00 | 0.52 | 72.43 |
| INTERPRO         | IPR006208:Cystine knot                                             | 2  | 20.50 | 1.00 | 0.52 | 72.43 |
| INTERPRO         | IPR013111:EGF, extracellular                                       | 2  | 20.50 | 1.00 | 0.52 | 72.43 |
| GOTERM_BP_DIRECT | GO:0002523~leukocyte migration involved in inflammatory respor     | 2  | 38.35 | 1.00 | 0.52 | 56.40 |
| GOTERM_BP_DIRECT | GO:0031622~positive regulation of fever generation                 | 2  | 38.35 | 1.00 | 0.52 | 56.40 |
| GOTERM_BP_DIRECT | GO:0043569~negative regulation of insulin-like growth factor rece  | 2  | 38.35 | 1.00 | 0.52 | 56.40 |
| GOTERM_BP_DIRECT | GO:0060346~bone trabecula formation                                | 2  | 38.35 | 1.00 | 0.52 | 56.40 |
| GOTERM_BP_DIRECT | GO:0090263~positive regulation of canonical Wnt signaling pathw    | 4  | 4.61  | 1.00 | 0.52 | 59.56 |
| GOTERM_MF_DIRECT | GO:0001077~transcriptional activator activity, RNA polymerase II c | 5  | 3.36  | 1.00 | 0.53 | 54.93 |
| GOTERM_BP_DIRECT | GO:0007179~transforming growth factor beta receptor signaling p    | 4  | 4.54  | 1.00 | 0.53 | 60.92 |
| GOTERM_BP_DIRECT | GO:0033689~negative regulation of osteoblast proliferation         | 2  | 34.09 | 1.00 | 0.53 | 60.70 |
| GOTERM_BP_DIRECT | GO:0030728~ovulation                                               | 2  | 34.09 | 1.00 | 0.53 | 60.70 |
| GOTERM_BP_DIRECT | GO:0090244~Wnt signaling pathway involved in somitogenesis         | 2  | 34.09 | 1.00 | 0.53 | 60.70 |
| GOTERM_BP_DIRECT | GO:0050776~regulation of immune response                           | 4  | 4.51  | 1.00 | 0.53 | 61.59 |
| GOTERM_BP_DIRECT | GO:0051216~cartilage development                                   | 3  | 7.54  | 1.00 | 0.53 | 62.31 |
| GOTERM_BP_DIRECT | GO:0045669~positive regulation of osteoblast differentiation       | 3  | 7.54  | 1.00 | 0.53 | 62.31 |
| UP_SEQ_FEATURE   | repeat:LRR 8                                                       | 4  | 4.80  | 1.00 | 0.53 | 52.76 |
| UP_SEQ_FEATURE   | glycosylation site:O-linked (Gal...)                               | 2  | 39.46 | 1.00 | 0.54 | 52.05 |
| UP_SEQ_FEATURE   | glycosylation site:N-linked (Glc) (glycation)                      | 2  | 39.46 | 1.00 | 0.54 | 52.05 |
| GOTERM_MF_DIRECT | GO:0008191~metalloendopeptidase inhibitor activity                 | 2  | 22.01 | 1.00 | 0.55 | 68.55 |
| GOTERM_MF_DIRECT | GO:0005344~oxygen transporter activity                             | 2  | 22.01 | 1.00 | 0.55 | 68.55 |
| GOTERM_MF_DIRECT | GO:0008083~growth factor activity                                  | 4  | 3.85  | 1.00 | 0.55 | 67.57 |
| GOTERM_MF_DIRECT | GO:0030674~protein binding, bridging                               | 3  | 6.25  | 1.00 | 0.56 | 66.62 |
| GOTERM_MF_DIRECT | GO:0048018~receptor agonist activity                               | 2  | 20.54 | 1.00 | 0.56 | 71.05 |
| GOTERM_MF_DIRECT | GO:0005504~fatty acid binding                                      | 2  | 20.54 | 1.00 | 0.56 | 71.05 |
| GOTERM_MF_DIRECT | GO:0035259~glucocorticoid receptor binding                         | 2  | 23.70 | 1.00 | 0.56 | 65.84 |
| GOTERM_MF_DIRECT | GO:0017017~MAP kinase tyrosine/serine/threonine phosphatase        | 2  | 23.70 | 1.00 | 0.56 | 65.84 |
| KEGG_PATHWAY     | hsa04380:Osteoclast differentiation                                | 4  | 3.86  | 1.00 | 0.58 | 61.75 |
| UP_SEQ_FEATURE   | domain:Fibrillar collagen NC1                                      | 2  | 32.28 | 1.00 | 0.58 | 59.28 |
| GOTERM_BP_DIRECT | GO:0030593~neutrophil chemotaxis                                   | 3  | 6.97  | 1.00 | 0.58 | 67.56 |
| GOTERM_BP_DIRECT | GO:0031100~organ regeneration                                      | 3  | 6.97  | 1.00 | 0.58 | 67.56 |
| GOTERM_BP_DIRECT | GO:0035313~wound healing, spreading of epidermal cells             | 2  | 27.89 | 1.00 | 0.58 | 68.07 |
| UP_SEQ_FEATURE   | compositionally biased region:Cys-rich                             | 4  | 4.47  | 1.00 | 0.59 | 59.19 |
| UP_SEQ_FEATURE   | DNA-binding region:Basic motif                                     | 4  | 4.36  | 1.00 | 0.59 | 61.44 |
| GOTERM_BP_DIRECT | GO:0006869~lipid transport                                         | 3  | 6.67  | 1.00 | 0.60 | 70.47 |
| GOTERM_BP_DIRECT | GO:0050732~negative regulation of peptidyl-tyrosine phosphoryla    | 2  | 25.56 | 1.00 | 0.61 | 71.22 |
| GOTERM_BP_DIRECT | GO:0030208~dermatan sulfate biosynthetic process                   | 2  | 25.56 | 1.00 | 0.61 | 71.22 |
| GOTERM_BP_DIRECT | GO:0045820~negative regulation of glycolytic process               | 2  | 25.56 | 1.00 | 0.61 | 71.22 |
| GOTERM_BP_DIRECT | GO:0090179~planar cell polarity pathway involved in neural tube c  | 2  | 25.56 | 1.00 | 0.61 | 71.22 |
| GOTERM_BP_DIRECT | GO:0050729~positive regulation of inflammatory response            | 3  | 6.48  | 1.00 | 0.61 | 72.30 |
| KEGG_PATHWAY     | hsa03320:PPAR signaling pathway                                    | 3  | 5.61  | 1.00 | 0.61 | 68.37 |
| UP_SEQ_FEATURE   | metal ion-binding site:Iron (heme distal ligand)                   | 2  | 27.32 | 1.00 | 0.62 | 65.42 |
| GOTERM_BP_DIRECT | GO:0010952~positive regulation of peptidase activity               | 2  | 23.60 | 1.00 | 0.63 | 74.06 |
| GOTERM_BP_DIRECT | GO:0006957~complement activation, alternative pathway              | 2  | 23.60 | 1.00 | 0.63 | 74.06 |
| UP_SEQ_FEATURE   | repeat:LRR 7                                                       | 4  | 4.04  | 1.00 | 0.63 | 68.32 |
| UP_SEQ_FEATURE   | glycosylation site:C-linked (Man)                                  | 2  | 25.37 | 1.00 | 0.64 | 68.13 |
| GOTERM_BP_DIRECT | GO:0071347~cellular response to interleukin-1                      | 3  | 6.14  | 1.00 | 0.64 | 75.74 |
| GOTERM_BP_DIRECT | GO:0090090~negative regulation of canonical Wnt signaling pathw    | 4  | 3.79  | 1.00 | 0.65 | 76.92 |
| GOTERM_BP_DIRECT | GO:0030502~negative regulation of bone mineralization              | 2  | 21.91 | 1.00 | 0.65 | 76.61 |
| GOTERM_BP_DIRECT | GO:0001706~endoderm formation                                      | 2  | 21.91 | 1.00 | 0.65 | 76.61 |
| GOTERM_BP_DIRECT | GO:0043508~negative regulation of JUN kinase activity              | 2  | 21.91 | 1.00 | 0.65 | 76.61 |

|                  |                                                                  |    |        |      |      |       |
|------------------|------------------------------------------------------------------|----|--------|------|------|-------|
| GOTERM_BP_DIRECT | GO:0001516~prostaglandin biosynthetic process                    | 2  | 21.91  | 1.00 | 0.65 | 76.61 |
| GOTERM_BP_DIRECT | GO:0070208~protein heterotrimerization                           | 2  | 21.91  | 1.00 | 0.65 | 76.61 |
| GOTERM_BP_DIRECT | GO:0031640~killing of cells of other organism                    | 2  | 21.91  | 1.00 | 0.65 | 76.61 |
| GOTERM_BP_DIRECT | GO:0060347~heart trabecula formation                             | 2  | 21.91  | 1.00 | 0.65 | 76.61 |
| GOTERM_BP_DIRECT | GO:0019371~cyclooxygenase pathway                                | 2  | 21.91  | 1.00 | 0.65 | 76.61 |
| GOTERM_BP_DIRECT | GO:0031116~positive regulation of microtubule polymerization     | 2  | 21.91  | 1.00 | 0.65 | 76.61 |
| GOTERM_BP_DIRECT | GO:0045892~negative regulation of transcription, DNA-templated   | 7  | 2.22   | 1.00 | 0.66 | 78.94 |
| GOTERM_BP_DIRECT | GO:0045944~positive regulation of transcription from RNA polym   | 11 | 1.75   | 1.00 | 0.66 | 79.49 |
| GOTERM_BP_DIRECT | GO:0030214~hyaluronan catabolic process                          | 2  | 20.45  | 1.00 | 0.66 | 78.92 |
| GOTERM_BP_DIRECT | GO:0015671~oxygen transport                                      | 2  | 20.45  | 1.00 | 0.66 | 78.92 |
| GOTERM_BP_DIRECT | GO:0043409~negative regulation of MAPK cascade                   | 2  | 20.45  | 1.00 | 0.66 | 78.92 |
| GOTERM_BP_DIRECT | GO:0006915~apoptotic process                                     | 8  | 2.05   | 1.00 | 0.66 | 78.78 |
| GOTERM_BP_DIRECT | GO:0030949~positive regulation of vascular endothelial growth fa | 2  | 19.17  | 1.00 | 0.67 | 81.00 |
| GOTERM_BP_DIRECT | GO:0048546~digestive tract morphogenesis                         | 2  | 19.17  | 1.00 | 0.67 | 81.00 |
| UP_SEQ_FEATURE   | domain:EGF-like 9; calcium-binding                               | 2  | 22.19  | 1.00 | 0.67 | 72.93 |
| UP_SEQ_FEATURE   | metal ion-binding site:Iron (heme proximal ligand)               | 2  | 22.19  | 1.00 | 0.67 | 72.93 |
| GOTERM_BP_DIRECT | GO:0007584~response to nutrient                                  | 3  | 5.61   | 1.00 | 0.67 | 80.98 |
| UP_SEQ_FEATURE   | domain:EGF-like 2                                                | 3  | 5.99   | 1.00 | 0.68 | 74.10 |
| OMIM_DISEASE     | 166220:Osteogenesis imperfecta, type IV                          | 2  | 131.67 | 0.69 | 0.69 | 14.58 |
| OMIM_DISEASE     | 166210:Osteogenesis imperfecta, type II                          | 2  | 131.67 | 0.69 | 0.69 | 14.58 |
| OMIM_DISEASE     | 259420:Osteogenesis imperfecta, type III                         | 2  | 131.67 | 0.69 | 0.69 | 14.58 |
