# Supplementary material
Source: PubMed Central journal article supplement (PMC5535754)
Supplement: NIHMS884641-supplement-Supplementary_Table_3.pdf [file NIHMS884641-supplement-Supplementary_Table_3.pdf]

**Supplementary Table 3: Down-regulated gene ontology pathways in UC patients harboring remote neoplasia using DAVID webtool**

| Category         | Term                                                            | Count | Fold Enrichment | Bonferroni | Benjamini | FDR   |
|------------------|-----------------------------------------------------------------|-------|-----------------|------------|-----------|-------|
| GOTERM_BP_DIRECT | GO:0015701~bicarbonate transport                                | 5     | 41.87           | 0.002      | 0.002     | 0.01  |
| UP_SEQ_FEATURE   | signal peptide                                                  | 25    | 2.50            | 0.002      | 0.002     | 0.01  |
| KEGG_PATHWAY     | hsa04976:Bile secretion                                         | 5     | 19.21           | 0.01       | 0.01      | 0.10  |
| UP_KEYWORDS      | Signal                                                          | 24    | 2.29            | 0.01       | 0.01      | 0.09  |
| PIR_SUPERFAMILY  | PIRSF001849:guanylin                                            | 2     | 237.14          | 0.04       | 0.04      | 3.41  |
| SMART            | SM01057:SM01057                                                 | 3     | 53.85           | 0.05       | 0.05      | 1.16  |
| KEGG_PATHWAY     | hsa00910:Nitrogen metabolism                                    | 3     | 46.77           | 0.10       | 0.05      | 1.66  |
| INTERPRO         | IPR013098:Immunoglobulin I-set                                  | 5     | 10.04           | 0.21       | 0.06      | 1.74  |
| KEGG_PATHWAY     | hsa04964:Proximal tubule bicarbonate reclamation                | 3     | 34.57           | 0.17       | 0.06      | 3.03  |
| GOTERM_MF_DIRECT | GO:0004089~carbonate dehydratase activity                       | 3     | 69.26           | 0.07       | 0.07      | 0.87  |
| INTERPRO         | IPR001148:Alpha carbonic anhydrase                              | 3     | 53.23           | 0.20       | 0.07      | 1.66  |
| GOTERM_BP_DIRECT | GO:0055085~transmembrane transport                              | 9     | 4.69            | 0.14       | 0.07      | 0.67  |
| INTERPRO         | IPR023561:Carbonic anhydrase, alpha-class                       | 3     | 59.88           | 0.16       | 0.08      | 1.31  |
| INTERPRO         | IPR018338:Carbonic anhydrase, alpha-class, conserved site       | 3     | 79.85           | 0.09       | 0.09      | 0.73  |
| SMART            | SM00408:SM00408                                                 | 5     | 6.84            | 0.18       | 0.09      | 4.54  |
| UP_KEYWORDS      | Transmembrane                                                   | 26    | 1.65            | 0.52       | 0.12      | 6.00  |
| UP_KEYWORDS      | Glycoprotein                                                    | 24    | 1.77            | 0.39       | 0.12      | 4.07  |
| UP_KEYWORDS      | Secreted                                                        | 14    | 2.47            | 0.35       | 0.13      | 3.47  |
| UP_KEYWORDS      | Transmembrane helix                                             | 26    | 1.66            | 0.51       | 0.13      | 5.72  |
| INTERPRO         | IPR003598:Immunoglobulin subtype 2                              | 5     | 7.16            | 0.55       | 0.15      | 5.77  |
| UP_KEYWORDS      | Membrane                                                        | 33    | 1.55            | 0.28       | 0.15      | 2.74  |
| INTERPRO         | IPR000879:Guanylin                                              | 2     | 319.39          | 0.63       | 0.15      | 7.19  |
| GOTERM_CC_DIRECT | GO:0070062~extracellular exosome                                | 18    | 1.95            | 0.37       | 0.21      | 6.27  |
| GOTERM_CC_DIRECT | GO:0016323~basolateral plasma membrane                          | 5     | 7.98            | 0.22       | 0.22      | 3.45  |
| GOTERM_BP_DIRECT | GO:0006730~one-carbon metabolic process                         | 3     | 33.49           | 0.66       | 0.30      | 4.54  |
| GOTERM_BP_DIRECT | GO:0034220~ion transmembrane transport                          | 5     | 6.98            | 0.80       | 0.33      | 6.81  |
| UP_SEQ_FEATURE   | topological domain:Cytoplasmic                                  | 20    | 1.94            | 0.56       | 0.34      | 4.57  |
| UP_KEYWORDS      | Antibiotic                                                      | 3     | 10.89           | 0.99       | 0.38      | 30.35 |
| GOTERM_CC_DIRECT | GO:0045177~apical part of cell                                  | 3     | 11.54           | 0.87       | 0.40      | 24.99 |
| UP_KEYWORDS      | Cell membrane                                                   | 16    | 1.74            | 0.99       | 0.41      | 29.99 |
| UP_KEYWORDS      | Transport                                                       | 12    | 2.04            | 0.98       | 0.42      | 27.45 |
| GOTERM_MF_DIRECT | GO:0004064~arylesterase activity                                | 2     | 107.73          | 0.81       | 0.42      | 18.02 |
| UP_KEYWORDS      | Antimicrobial                                                   | 3     | 9.54            | 1.00       | 0.43      | 37.02 |
| GOTERM_MF_DIRECT | GO:0005254~chloride channel activity                            | 3     | 17.31           | 0.68       | 0.44      | 12.83 |
| INTERPRO         | IPR026845:Neurexophilin/NXPE                                    | 2     | 79.85           | 0.98       | 0.44      | 25.81 |
| GOTERM_CC_DIRECT | GO:0005615~extracellular space                                  | 10    | 2.34            | 0.82       | 0.44      | 21.49 |
| UP_KEYWORDS      | Polymorphism                                                    | 43    | 1.19            | 1.00       | 0.48      | 45.51 |
| KEGG_PATHWAY     | hsa04972:Pancreatic secretion                                   | 3     | 8.64            | 0.93       | 0.49      | 35.97 |
| UP_SEQ_FEATURE   | transmembrane region                                            | 24    | 1.59            | 0.95       | 0.53      | 15.93 |
| UP_KEYWORDS      | Immunoglobulin domain                                           | 5     | 3.27            | 1.00       | 0.54      | 53.74 |
| GOTERM_MF_DIRECT | GO:0005179~hormone activity                                     | 3     | 10.21           | 0.96       | 0.54      | 31.16 |
| UP_KEYWORDS      | Lyase                                                           | 3     | 6.86            | 1.00       | 0.54      | 57.01 |
| GOTERM_BP_DIRECT | GO:0007586~digestion                                            | 3     | 16.75           | 0.98       | 0.56      | 16.46 |
| UP_KEYWORDS      | Lectin                                                          | 3     | 5.93            | 1.00       | 0.61      | 66.61 |
| UP_SEQ_FEATURE   | topological domain:Extracellular                                | 16    | 1.92            | 0.95       | 0.63      | 15.49 |
| GOTERM_CC_DIRECT | GO:0005886~plasma membrane                                      | 19    | 1.46            | 1.00       | 0.67      | 53.80 |
| UP_SEQ_FEATURE   | glycosylation site:N-linked (GlcNAc...)                         | 20    | 1.58            | 1.00       | 0.76      | 33.11 |
| GOTERM_BP_DIRECT | GO:0031284~positive regulation of guanylate cyclase activity    | 2     | 60.90           | 1.00       | 0.76      | 35.12 |
| GOTERM_BP_DIRECT | GO:0002009~morphogenesis of an epithelium                       | 2     | 51.53           | 1.00       | 0.77      | 40.03 |
| GOTERM_BP_DIRECT | GO:1902476~chloride transmembrane transport                     | 3     | 11.16           | 1.00       | 0.77      | 32.16 |
| GOTERM_BP_DIRECT | GO:0051453~regulation of intracellular pH                       | 2     | 39.40           | 1.00       | 0.82      | 48.76 |
| GOTERM_BP_DIRECT | GO:0006810~transport                                            | 4     | 4.51            | 1.00       | 0.83      | 53.79 |
| INTERPRO         | IPR007110:Immunoglobulin-like domain                            | 5     | 2.93            | 1.00       | 0.84      | 66.54 |
| GOTERM_BP_DIRECT | GO:0006811~ion transport                                        | 3     | 6.79            | 1.00       | 0.87      | 62.03 |
| GOTERM_BP_DIRECT | GO:0043552~positive regulation of phosphatidylinositol 3-kinase | 2     | 22.33           | 1.00       | 0.88      | 69.29 |
| GOTERM_BP_DIRECT | GO:0050832~defense response to fungus                           | 2     | 23.92           | 1.00       | 0.88      | 66.77 |
| UP_SEQ_FEATURE   | metal ion-binding site:Zinc; catalytic                          | 3     | 7.78            | 1.00       | 0.88      | 51.65 |
| GOTERM_BP_DIRECT | GO:0045597~positive regulation of cell differentiation          | 2     | 19.14           | 1.00       | 0.90      | 74.78 |
| UP_SEQ_FEATURE   | sequence variant                                                | 43    | 1.16            | 1.00       | 0.95      | 70.86 |
