# Supplementary material
Source: PubMed Central journal article supplement (PMC5535754)
Supplement: NIHMS884641-supplement-Supplementary_Table_4.pdf [file NIHMS884641-supplement-Supplementary_Table_4.pdf]

## miRNA Expression

| ProbeID | Annotation        | logFC | AvgExpr | AvgHy3 | P.Value  | adj.P.Val |
|---------|-------------------|-------|---------|--------|----------|-----------|
| 169159  | hsa-miR-4521      | -0.60 | -0.46   | 5.96   | 9.98E-08 | 3.95E-05  |
| 168642  | hsa-miR-642b-3p   | 0.81  | -0.57   | 6.01   | 1.28E-07 | 3.95E-05  |
| 169110  | hsa-miR-4497      | 0.88  | -0.34   | 9.02   | 3.66E-07 | 7.53E-05  |
| 145852  | hsa-miR-210       | -0.62 | -0.13   | 7.16   | 1.32E-06 | 2.03E-04  |
| 42502   | hsa-miR-204-3p    | 0.77  | -0.32   | 9.01   | 3.20E-06 | 3.95E-04  |
| 10986   | hsa-miR-193a-3p   | 0.74  | -0.26   | 7.14   | 6.19E-06 | 5.61E-04  |
| 147790  | hsv2-miR-H7-3p    | -0.90 | -0.42   | 9.42   | 6.36E-06 | 5.61E-04  |
| 147595  | hsa-miR-3178      | 0.75  | -0.39   | 7.37   | 7.86E-06 | 6.07E-04  |
| 27537   | ebv-miR-BART13-3p | 0.63  | -0.37   | 7.01   | 1.20E-05 | 6.77E-04  |
| 146090  | hsv1-miR-H7-3p    | -0.94 | -0.46   | 10.02  | 1.21E-05 | 6.77E-04  |
| 147884  | hsv2-miR-H25      | -0.74 | -0.39   | 8.95   | 1.19E-05 | 6.77E-04  |
| 42708   | hsa-miR-99a-5p    | 1.03  | -0.61   | 5.71   | 1.53E-05 | 7.87E-04  |
| 148481  | hsa-miR-3646      | 0.71  | -0.39   | 9.99   | 1.66E-05 | 7.88E-04  |
| 169116  | hsa-miR-4788      | 1.09  | -1.05   | 6.10   | 1.98E-05 | 8.74E-04  |
| 30787   | hsa-miR-125b-5p   | 1.14  | -0.40   | 9.81   | 2.92E-05 | 1.07E-03  |
| 148032  | hsa-miR-3685      | 1.24  | -0.52   | 9.14   | 2.85E-05 | 1.07E-03  |
| 147889  | hsv1-miR-H14-3p   | 0.20  | 0.00    | 5.86   | 2.96E-05 | 1.07E-03  |
| 168933  | hsa-miR-5581-3p   | -0.43 | -0.36   | 8.05   | 3.39E-05 | 1.16E-03  |
| 146196  | hsa-miR-711       | 0.46  | -0.49   | 6.19   | 3.86E-05 | 1.25E-03  |
| 168968  | hsa-miR-147b      | -0.46 | -0.14   | 6.92   | 4.30E-05 | 1.33E-03  |
| 33596   | hsa-miR-126-5p    | 0.65  | 0.54    | 6.68   | 6.25E-05 | 1.54E-03  |
| 17953   | hsa-miR-183-3p    | 0.57  | -0.50   | 7.17   | 5.79E-05 | 1.54E-03  |
| 147604  | hsa-miR-4285      | -0.70 | -0.31   | 11.09  | 5.95E-05 | 1.54E-03  |
| 147603  | hsa-miR-4300      | -0.29 | -0.10   | 5.86   | 6.23E-05 | 1.54E-03  |
| 42866   | hsa-miR-451a      | 1.91  | -0.32   | 10.36  | 5.25E-05 | 1.54E-03  |
| 148317  | hsa-miR-3621      | 0.71  | -0.68   | 7.53   | 6.73E-05 | 1.60E-03  |
| 147836  | hsv2-miR-H7-5p    | 0.84  | -0.66   | 5.79   | 7.42E-05 | 1.69E-03  |
| 29802   | hsa-miR-144-3p    | 1.22  | -0.74   | 6.38   | 1.04E-04 | 2.28E-03  |
| 168661  | hsa-miR-4531      | 0.60  | -0.38   | 9.37   | 1.11E-04 | 2.34E-03  |
| 168605  | hsa-miR-4653-3p   | 0.91  | -0.46   | 6.55   | 1.14E-04 | 2.34E-03  |
| 148379  | hsa-miR-3654      | -0.39 | -0.21   | 9.31   | 1.35E-04 | 2.69E-03  |
| 17272   | hsa-miR-551a      | 0.28  | 0.00    | 6.72   | 1.66E-04 | 3.20E-03  |
| 42929   | hsa-miR-25-5p     | 0.42  | -0.38   | 7.37   | 1.72E-04 | 3.22E-03  |
| 169182  | hsa-miR-4728-3p   | -0.42 | -0.18   | 8.34   | 1.92E-04 | 3.48E-03  |
| 147830  | hsv1-miR-H18      | 0.42  | -0.57   | 5.90   | 2.10E-04 | 3.61E-03  |
| 19007   | SNORD3@           | 0.44  | -0.11   | 11.16  | 2.11E-04 | 3.61E-03  |
| 169282  | hsa-miR-4290      | -0.47 | -0.16   | 11.60  | 2.31E-04 | 3.76E-03  |
| 42808   | hsa-miR-874       | 0.33  | -0.51   | 6.49   | 2.25E-04 | 3.76E-03  |
| 145943  | hsa-miR-100-5p    | 0.72  | -0.17   | 6.71   | 2.77E-04 | 4.31E-03  |
| 29379   | hsa-miR-452-5p    | 0.21  | 0.35    | 6.13   | 2.80E-04 | 4.31E-03  |
| 169395  | hsa-miR-4484      | 0.74  | -0.77   | 7.22   | 3.22E-04 | 4.73E-03  |
| 27740   | hsa-miR-574-5p    | -0.27 | 0.12    | 8.63   | 3.22E-04 | 4.73E-03  |
| 146179  | hsa-miR-2113      | 0.51  | -0.27   | 6.67   | 3.40E-04 | 4.87E-03  |
| 4700    | hsa-miR-140-5p    | 0.40  | 0.52    | 6.88   | 4.29E-04 | 5.29E-03  |

|        |                                   |       |       |       |          |          |
|--------|-----------------------------------|-------|-------|-------|----------|----------|
| 148687 | hsa-miR-1908                      | -0.57 | -0.33 | 10.55 | 4.36E-04 | 5.29E-03 |
| 17427  | hsa-miR-200c-3p                   | -0.94 | 0.11  | 10.16 | 4.37E-04 | 5.29E-03 |
| 148000 | hsa-miR-3195                      | 0.27  | -0.28 | 5.79  | 4.26E-04 | 5.29E-03 |
| 147942 | hsa-miR-4268                      | -0.52 | -0.19 | 11.06 | 3.94E-04 | 5.29E-03 |
| 168849 | hsa-miR-4635                      | 0.50  | -0.95 | 5.57  | 4.31E-04 | 5.29E-03 |
| 168954 | hsa-miR-5580-5p                   | -0.35 | -0.38 | 5.72  | 3.93E-04 | 5.29E-03 |
| 17892  | hsa-miRPlus-C1087                 | 0.51  | -0.25 | 5.55  | 3.99E-04 | 5.29E-03 |
| 168653 | hsa-miR-3158-5p                   | 0.83  | -0.77 | 8.13  | 4.72E-04 | 5.50E-03 |
| 148085 | hsa-miR-3687                      | -0.66 | -0.35 | 7.88  | 4.90E-04 | 5.50E-03 |
| 145736 | hsa-miR-605                       | -0.33 | -0.06 | 5.73  | 4.84E-04 | 5.50E-03 |
| 42838  | hsa-miRPlus-C1076                 | 0.23  | 0.05  | 6.00  | 4.83E-04 | 5.50E-03 |
| 13177  | hsa-miR-143-3p                    | 1.22  | -0.47 | 11.29 | 5.16E-04 | 5.59E-03 |
| 168980 | hsa-miR-4324                      | 0.49  | -0.43 | 7.23  | 5.09E-04 | 5.59E-03 |
| 4610   | hsa-miR-126-3p                    | 0.96  | 0.20  | 9.04  | 5.44E-04 | 5.79E-03 |
| 148684 | hsa-miR-628-3p                    | -0.23 | -0.18 | 6.44  | 5.58E-04 | 5.84E-03 |
| 148621 | hsa-miR-892a                      | -0.21 | 0.27  | 6.38  | 5.76E-04 | 5.92E-03 |
| 169312 | hsa-miR-548an                     | -0.22 | -0.19 | 6.09  | 6.01E-04 | 6.08E-03 |
| 169358 | hsa-miR-4417                      | -0.48 | -0.40 | 6.35  | 6.38E-04 | 6.35E-03 |
| 169375 | hsa-miR-660-3p                    | -0.58 | -0.12 | 12.50 | 6.75E-04 | 6.61E-03 |
| 42630  | hsa-miR-140-3p                    | 0.47  | -0.15 | 7.53  | 7.09E-04 | 6.83E-03 |
| 17561  | ebv-miR-BART6-3p                  | 0.91  | -0.65 | 7.24  | 7.87E-04 | 7.36E-03 |
| 146180 | hsa-miR-1909-3p                   | -0.34 | -0.19 | 5.73  | 7.86E-04 | 7.36E-03 |
| 145789 | hsa-miR-550a-3-5p/hsa-miR-550a-5p | -0.20 | -0.05 | 6.04  | 8.05E-04 | 7.41E-03 |
| 11184  | hsa-miR-99b-5p                    | 0.52  | -0.55 | 6.45  | 8.19E-04 | 7.43E-03 |
| 19591  | hsa-miR-199b-5p                   | 0.59  | 0.20  | 6.82  | 9.06E-04 | 7.99E-03 |
| 168680 | hsa-miR-378f                      | -0.56 | -0.40 | 6.14  | 9.07E-04 | 7.99E-03 |
| 42898  | hsa-miR-124-5p                    | -0.27 | 0.16  | 6.62  | 9.33E-04 | 8.11E-03 |
| 46381  | hsa-miR-1298                      | -0.42 | 0.09  | 6.25  | 9.88E-04 | 8.27E-03 |
| 147530 | hsa-miR-378b                      | -0.37 | -0.22 | 6.36  | 9.92E-04 | 8.27E-03 |
| 168943 | hsa-miR-4769-3p                   | -0.19 | 0.08  | 5.98  | 9.92E-04 | 8.27E-03 |
| 169024 | hsa-miR-3960                      | -0.46 | -0.08 | 13.96 | 1.01E-03 | 8.33E-03 |
| 42522  | ebv-miR-BART19-3p                 | 0.91  | -0.28 | 9.54  | 1.05E-03 | 8.49E-03 |
| 168640 | hsa-miR-4475                      | 0.57  | -0.33 | 8.84  | 1.06E-03 | 8.52E-03 |
| 46918  | hsa-miR-375                       | -0.89 | -0.10 | 8.85  | 1.14E-03 | 9.01E-03 |
| 42641  | hsa-miR-145-5p                    | 0.91  | -0.65 | 9.58  | 1.22E-03 | 9.39E-03 |
| 147806 | hsa-miR-3149                      | -0.34 | 0.02  | 9.02  | 1.22E-03 | 9.39E-03 |
| 11078  | hsa-miR-365a-3p/hsa-miR-365b-3p   | 0.50  | 0.09  | 6.94  | 1.23E-03 | 9.40E-03 |
| 14272  | hsa-miR-542-3p                    | 0.36  | 0.06  | 5.85  | 1.28E-03 | 9.63E-03 |
| 169022 | hsa-miR-4797-5p                   | -0.32 | -0.78 | 5.64  | 1.30E-03 | 9.68E-03 |
| 147771 | hsa-miR-4328                      | 0.91  | -0.68 | 9.24  | 1.46E-03 | 1.08E-02 |
| 168635 | hsa-miR-378e                      | -0.62 | -0.20 | 7.21  | 1.48E-03 | 1.08E-02 |
| 13132  | hsa-miR-519e-5p                   | 0.30  | -0.43 | 7.03  | 1.50E-03 | 1.08E-02 |
| 29872  | hsa-miR-340-5p                    | -0.22 | -0.03 | 7.00  | 1.84E-03 | 1.30E-02 |
| 29575  | hsa-miR-32-3p                     | -0.34 | 0.01  | 9.70  | 1.94E-03 | 1.36E-02 |
| 168971 | hsa-miR-4449                      | 0.65  | -0.58 | 6.11  | 1.97E-03 | 1.37E-02 |
| 145647 | hsa-miR-584-5p                    | 0.20  | 0.08  | 6.71  | 2.00E-03 | 1.37E-02 |

|        |                    |       |       |       |          |          |
|--------|--------------------|-------|-------|-------|----------|----------|
| 168625 | hsa-miR-4539       | -0.56 | -0.27 | 6.69  | 2.13E-03 | 1.44E-02 |
| 169266 | hsa-miR-378d       | -0.68 | -0.12 | 8.26  | 2.27E-03 | 1.52E-02 |
| 168950 | hsa-miR-4646-3p    | -0.14 | 0.05  | 6.47  | 2.29E-03 | 1.52E-02 |
| 168638 | hsa-miR-4530       | -0.53 | -0.40 | 9.63  | 2.36E-03 | 1.55E-02 |
| 169082 | hsa-miR-1275       | 0.57  | -0.33 | 9.73  | 2.46E-03 | 1.58E-02 |
| 169305 | hsa-miR-4455       | -0.34 | -0.03 | 9.53  | 2.44E-03 | 1.58E-02 |
| 42738  | hsa-miR-340-3p     | 0.16  | -0.05 | 5.92  | 2.50E-03 | 1.59E-02 |
| 147947 | hsa-miR-4308       | -0.23 | 0.06  | 6.44  | 2.64E-03 | 1.66E-02 |
| 11014  | hsa-miR-214-3p     | 0.46  | -0.22 | 8.32  | 2.74E-03 | 1.69E-02 |
| 11024  | hsa-miR-223-3p     | 0.91  | -0.16 | 8.63  | 2.77E-03 | 1.69E-02 |
| 168586 | hsa-miR-34a-5p     | 0.55  | -0.06 | 7.56  | 2.75E-03 | 1.69E-02 |
| 147792 | hsa-miR-3165       | 0.33  | -0.25 | 6.14  | 2.82E-03 | 1.70E-02 |
| 42570  | hsa-miR-194-3p     | -0.19 | 0.20  | 5.97  | 2.86E-03 | 1.72E-02 |
| 145838 | hsa-miR-125b-1-3p  | 0.23  | 0.19  | 5.87  | 3.00E-03 | 1.72E-02 |
| 145974 | hsa-miR-200b-5p    | -0.29 | 0.09  | 6.32  | 3.03E-03 | 1.72E-02 |
| 11052  | hsa-miR-31-5p      | 0.59  | -0.10 | 5.50  | 2.96E-03 | 1.72E-02 |
| 169299 | hsa-miR-4538       | -0.37 | -0.25 | 6.08  | 3.02E-03 | 1.72E-02 |
| 169079 | hsa-miR-4667-5p    | 0.41  | -0.29 | 7.70  | 2.93E-03 | 1.72E-02 |
| 46507  | hsa-miR-921        | 0.43  | -0.64 | 6.11  | 3.00E-03 | 1.72E-02 |
| 17532  | ebv-miR-BART5-5p   | -0.39 | -0.53 | 5.70  | 3.14E-03 | 1.74E-02 |
| 147805 | hsa-miR-3183       | -0.17 | -0.19 | 6.58  | 3.11E-03 | 1.74E-02 |
| 148049 | hsa-miR-3924       | -0.31 | -0.03 | 7.73  | 3.17E-03 | 1.74E-02 |
| 42661  | hsa-miR-492        | 0.18  | -0.13 | 6.03  | 3.43E-03 | 1.87E-02 |
| 46467  | hsa-miR-143-5p     | 0.44  | -0.10 | 6.28  | 3.65E-03 | 1.98E-02 |
| 10990  | hsa-miR-196a-5p    | -0.37 | 0.37  | 6.93  | 3.84E-03 | 2.02E-02 |
| 147755 | hsa-miR-378c       | -0.49 | 0.27  | 8.01  | 3.80E-03 | 2.02E-02 |
| 169244 | hsa-miR-5572       | 0.39  | -0.27 | 7.63  | 3.86E-03 | 2.02E-02 |
| 147919 | kshv-miR-K12-12-3p | -0.40 | -0.02 | 6.86  | 3.79E-03 | 2.02E-02 |
| 17732  | hsa-miR-192-5p     | -0.86 | 0.06  | 10.46 | 4.01E-03 | 2.05E-02 |
| 42965  | hsa-miR-424-5p     | 0.36  | 0.23  | 6.85  | 4.16E-03 | 2.05E-02 |
| 169285 | hsa-miR-4467       | -0.37 | -0.15 | 12.89 | 4.02E-03 | 2.05E-02 |
| 169194 | hsa-miR-4513       | 0.41  | -0.68 | 5.74  | 4.08E-03 | 2.05E-02 |
| 168789 | hsa-miR-4686       | -0.21 | 0.07  | 5.76  | 4.09E-03 | 2.05E-02 |
| 168668 | hsa-miR-4732-3p    | -0.51 | -0.41 | 8.46  | 4.13E-03 | 2.05E-02 |
| 148118 | hsa-miR-676-5p     | -0.37 | -0.40 | 6.29  | 4.16E-03 | 2.05E-02 |
| 147904 | hsa-miR-3148       | -0.27 | -0.18 | 7.47  | 4.23E-03 | 2.07E-02 |
| 147186 | hsa-miR-200b-3p    | -0.72 | 0.07  | 10.44 | 4.36E-03 | 2.12E-02 |
| 148641 | hsa-miR-518b       | -0.14 | -0.10 | 5.83  | 4.40E-03 | 2.12E-02 |
| 10916  | hsa-miR-1          | 0.70  | 0.31  | 6.76  | 4.61E-03 | 2.19E-02 |
| 32946  | hsa-miR-486-5p     | 0.28  | 0.26  | 6.44  | 4.59E-03 | 2.19E-02 |
| 148622 | hsa-miR-877-3p     | -0.22 | 0.07  | 8.05  | 4.66E-03 | 2.20E-02 |
| 10138  | hsa-miR-130a-3p    | 0.57  | 0.02  | 7.72  | 4.82E-03 | 2.25E-02 |
| 46788  | hsa-miR-1299       | -0.20 | 0.04  | 7.66  | 4.93E-03 | 2.26E-02 |
| 31867  | hsa-miR-145-3p     | 0.57  | -0.27 | 6.11  | 4.95E-03 | 2.26E-02 |
| 168994 | hsa-miR-3591-5p    | -0.20 | -0.12 | 7.32  | 4.89E-03 | 2.26E-02 |
| 46732  | hsa-miR-1264       | -0.19 | -0.11 | 8.53  | 5.01E-03 | 2.27E-02 |

|        |                                                                                               |       |       |       |          |          |
|--------|-----------------------------------------------------------------------------------------------|-------|-------|-------|----------|----------|
| 169399 | hsa-miR-4750-5p                                                                               | -0.43 | -0.26 | 10.10 | 5.07E-03 | 2.28E-02 |
| 146072 | hsa-miR-1469                                                                                  | -0.48 | -0.32 | 8.43  | 5.27E-03 | 2.36E-02 |
| 147776 | hsa-miR-4317                                                                                  | 0.37  | 0.06  | 6.70  | 5.46E-03 | 2.36E-02 |
| 169100 | hsa-miR-4758-3p                                                                               | -0.30 | -0.64 | 7.10  | 5.47E-03 | 2.36E-02 |
| 147701 | hsa-miR-491-3p                                                                                | -0.63 | -0.28 | 12.94 | 5.40E-03 | 2.36E-02 |
| 28302  | hsa-miRPlus-A1015                                                                             | -0.31 | -0.22 | 9.38  | 5.40E-03 | 2.36E-02 |
| 146098 | hsv1-miR-H5-3p                                                                                | -0.27 | -0.25 | 6.66  | 5.45E-03 | 2.36E-02 |
| 17946  | hsa-miR-192-3p                                                                                | -0.35 | 0.23  | 6.53  | 5.61E-03 | 2.40E-02 |
| 147616 | hsa-miR-4291                                                                                  | 0.31  | -0.35 | 7.17  | 5.64E-03 | 2.40E-02 |
| 148377 | hsa-miR-3653                                                                                  | -0.33 | 0.10  | 8.82  | 5.70E-03 | 2.41E-02 |
| 168639 | hsa-miR-4533                                                                                  | -0.40 | -0.26 | 8.30  | 5.88E-03 | 2.47E-02 |
| 169313 | hsa-miR-4800-3p                                                                               | 0.42  | -0.10 | 13.04 | 6.23E-03 | 2.60E-02 |
| 10946  | hsa-miR-141-3p                                                                                | -0.73 | -0.08 | 9.68  | 6.39E-03 | 2.63E-02 |
| 42902  | hsa-miR-185-5p                                                                                | 0.14  | -0.02 | 6.96  | 6.43E-03 | 2.63E-02 |
| 169380 | hsa-miR-3124-3p                                                                               | -0.31 | -0.13 | 11.49 | 6.44E-03 | 2.63E-02 |
| 169412 | hsa-miR-1260a                                                                                 | -0.25 | -0.39 | 8.54  | 6.88E-03 | 2.79E-02 |
| 17506  | hsa-miR-24-3p                                                                                 | 0.55  | -0.01 | 10.39 | 7.18E-03 | 2.89E-02 |
| 42592  | hsa-miR-338-3p                                                                                | 0.34  | 0.19  | 6.77  | 7.49E-03 | 2.98E-02 |
| 148668 | hsa-miR-378a-3p                                                                               | -0.52 | 0.03  | 9.03  | 7.50E-03 | 2.98E-02 |
| 46483  | hsa-miR-27a-3p                                                                                | 0.71  | 0.01  | 7.99  | 7.66E-03 | 2.99E-02 |
| 169189 | hsa-miR-4795-5p                                                                               | 0.38  | -0.35 | 7.99  | 7.70E-03 | 2.99E-02 |
| 46789  | hsa-miR-513b                                                                                  | 0.22  | 0.41  | 6.19  | 7.70E-03 | 2.99E-02 |
| 168717 | hsa-miR-5193                                                                                  | -0.21 | -0.25 | 7.58  | 7.60E-03 | 2.99E-02 |
| 29460  | hsa-miR-553                                                                                   | -0.12 | 0.03  | 5.79  | 7.77E-03 | 3.00E-02 |
| 10988  | hsa-miR-194-5p                                                                                | -0.70 | 0.00  | 10.23 | 8.16E-03 | 3.13E-02 |
| 146068 | hsa-miR-1915-3p                                                                               | 0.24  | -0.12 | 5.80  | 8.29E-03 | 3.16E-02 |
| 17676  | hsa-miR-152                                                                                   | 0.28  | 0.04  | 6.31  | 8.57E-03 | 3.24E-02 |
| 147772 | hsa-miR-4303                                                                                  | -0.24 | -0.10 | 5.88  | 8.82E-03 | 3.32E-02 |
| 147614 | hsa-miR-4299                                                                                  | 0.48  | -0.35 | 9.32  | 8.92E-03 | 3.33E-02 |
| 145677 | hsa-miR-139-5p                                                                                | 0.41  | -0.35 | 5.82  | 9.39E-03 | 3.48E-02 |
| 42702  | hsa-miR-30c-1-3p                                                                              | 0.21  | 0.00  | 5.80  | 9.42E-03 | 3.48E-02 |
| 13171  | hsa-miR-429                                                                                   | -0.51 | 0.14  | 7.71  | 9.51E-03 | 3.49E-02 |
| 169239 | hsa-miR-4732-5p                                                                               | 0.40  | -0.39 | 6.95  | 9.71E-03 | 3.52E-02 |
| 17668  | hsa-miR-552                                                                                   | 0.34  | -0.25 | 5.92  | 9.67E-03 | 3.52E-02 |
| 11020  | hsa-miR-22-3p                                                                                 | 0.32  | 0.01  | 10.14 | 1.03E-02 | 3.72E-02 |
| 169028 | hsa-miR-4708-3p                                                                               | -0.36 | -0.09 | 13.99 | 1.05E-02 | 3.75E-02 |
| 146086 | hsa-miR-30a-5p                                                                                | 0.39  | 0.05  | 7.03  | 1.07E-02 | 3.83E-02 |
|        | hsa-miR-518e-5p/hsa-miR-519a-5p/hsa-miR-519b-5p/hsa-miR-519c-5p/hsa-miR-522-5p/hsa-miR-523-5p |       |       |       |          |          |
| 13137  | hsa-miR-522-5p/hsa-miR-523-5p                                                                 | -0.39 | -0.28 | 7.73  | 1.08E-02 | 3.84E-02 |
| 146160 | hsa-miR-133b                                                                                  | 0.47  | -0.21 | 6.39  | 1.09E-02 | 3.84E-02 |
| 168689 | hsa-miR-361-3p                                                                                | 0.16  | 0.08  | 6.12  | 1.09E-02 | 3.84E-02 |
| 9938   | hsa-let-7i-5p                                                                                 | 0.35  | 0.12  | 8.92  | 1.12E-02 | 3.90E-02 |
| 11038  | hsa-miR-299-5p                                                                                | 0.12  | 0.44  | 5.97  | 1.15E-02 | 3.98E-02 |

|        |                                 |       |       |       |          |          |
|--------|---------------------------------|-------|-------|-------|----------|----------|
| 147506 | hsa-miR-21-5p                   | 0.60  | 0.26  | 10.52 | 1.16E-02 | 3.99E-02 |
| 147199 | hsa-miR-27b-3p                  | 0.55  | 0.07  | 8.85  | 1.21E-02 | 4.13E-02 |
| 14285  | hsa-miR-487b                    | -0.16 | -0.12 | 6.11  | 1.23E-02 | 4.18E-02 |
| 169330 | hsa-miR-23b-3p                  | 0.63  | 0.00  | 10.08 | 1.26E-02 | 4.28E-02 |
| 169274 | hsa-miR-5196-3p                 | -0.19 | -0.68 | 6.65  | 1.28E-02 | 4.33E-02 |
| 148420 | hsa-miR-3607-3p                 | -0.25 | -0.01 | 8.74  | 1.33E-02 | 4.47E-02 |
| 169402 | hsa-miR-625-3p                  | -0.12 | 0.03  | 5.95  | 1.36E-02 | 4.53E-02 |
| 46624  | hsa-miR-1236-3p                 | -0.15 | 0.31  | 6.94  | 1.37E-02 | 4.53E-02 |
| 10995  | hsa-miR-199a-3p/hsa-miR-199b-3p | 0.57  | 0.08  | 8.33  | 1.37E-02 | 4.53E-02 |
| 42744  | hsa-miR-23a-3p                  | 0.34  | -0.02 | 10.38 | 1.41E-02 | 4.59E-02 |
| 148410 | hsa-miR-3676-3p                 | 0.24  | -0.01 | 8.15  | 1.40E-02 | 4.59E-02 |
| 29562  | hsa-miR-199a-5p                 | 0.40  | -0.09 | 9.00  | 1.44E-02 | 4.62E-02 |
| 168844 | hsa-miR-4532                    | 0.30  | -0.64 | 10.41 | 1.43E-02 | 4.62E-02 |
| 168809 | hsa-miR-5698                    | -0.12 | 0.22  | 5.98  | 1.43E-02 | 4.62E-02 |
| 11045  | hsa-miR-302c-5p                 | -0.16 | -0.11 | 6.13  | 1.47E-02 | 4.65E-02 |
| 169326 | hsa-miR-451b                    | -0.17 | -0.45 | 6.50  | 1.46E-02 | 4.65E-02 |
| 168656 | hsa-miR-5002-3p                 | -0.14 | -0.60 | 6.35  | 1.47E-02 | 4.65E-02 |
| 146010 | hsa-miR-2116-5p                 | -0.22 | -0.10 | 7.95  | 1.51E-02 | 4.74E-02 |
| 168965 | hsa-miR-4765                    | -0.16 | -0.35 | 5.80  | 1.59E-02 | 4.95E-02 |
| 147900 | hsv2-miR-H6-3p                  | -0.17 | -0.09 | 8.38  | 1.58E-02 | 4.95E-02 |
| 168846 | hsa-miR-1273f                   | -0.29 | -0.14 | 7.44  | 1.60E-02 | 4.97E-02 |
| 147767 | hsa-miR-4279                    | -0.27 | -0.12 | 11.47 | 1.73E-02 | 5.34E-02 |
| 169360 | hsa-miR-4445-5p                 | 0.33  | -0.20 | 7.01  | 1.89E-02 | 5.81E-02 |
| 11121  | hsa-miR-489                     | 0.20  | -0.14 | 5.76  | 2.01E-02 | 6.14E-02 |
| 148349 | hsa-miR-3938                    | 0.22  | -0.07 | 6.10  | 2.03E-02 | 6.16E-02 |
| 145844 | hsa-miR-374a-5p                 | 0.49  | 0.27  | 6.63  | 2.10E-02 | 6.33E-02 |
| 11151  | hsa-miR-516b-5p                 | 0.16  | -0.07 | 6.60  | 2.10E-02 | 6.33E-02 |
| 146140 | hsa-miR-1976                    | -0.10 | 0.24  | 6.57  | 2.15E-02 | 6.45E-02 |
| 11040  | hsa-miR-29b-3p                  | 0.46  | 0.07  | 9.36  | 2.25E-02 | 6.72E-02 |
| 168776 | hsa-miR-4795-3p                 | 0.55  | -0.21 | 8.23  | 2.28E-02 | 6.76E-02 |
| 168805 | hsa-miR-4478                    | -0.28 | -0.23 | 8.06  | 2.35E-02 | 6.94E-02 |
| 168995 | hsa-miR-4791                    | 0.41  | -0.10 | 8.14  | 2.36E-02 | 6.94E-02 |
| 42839  | hsa-miR-135a-5p                 | 0.19  | 0.71  | 5.95  | 2.38E-02 | 6.97E-02 |
| 147851 | hsa-miR-3201                    | -0.19 | -0.20 | 6.20  | 2.40E-02 | 6.98E-02 |
| 168904 | hsa-miR-4473                    | -0.26 | -0.45 | 8.09  | 2.44E-02 | 7.07E-02 |
| 46866  | hsa-miR-1321                    | -0.16 | 0.01  | 7.14  | 2.46E-02 | 7.08E-02 |
| 148682 | hsa-miR-483-3p                  | -0.28 | -0.14 | 10.81 | 2.47E-02 | 7.08E-02 |
| 168597 | hsa-miR-5699                    | -0.12 | -0.10 | 5.82  | 2.49E-02 | 7.13E-02 |
| 146163 | hsa-miR-224-3p                  | -0.26 | -0.18 | 6.43  | 2.56E-02 | 7.29E-02 |
| 31026  | hsa-miR-101-3p                  | 0.44  | 0.00  | 8.31  | 2.58E-02 | 7.30E-02 |
| 46479  | hsa-miR-1304-5p                 | -0.18 | 0.05  | 7.57  | 2.65E-02 | 7.43E-02 |
| 169411 | hsa-miR-205-3p                  | -0.26 | -0.14 | 7.98  | 2.65E-02 | 7.43E-02 |
| 42761  | hsa-miR-675-5p                  | 0.36  | -0.57 | 7.53  | 2.67E-02 | 7.45E-02 |
| 169070 | hsa-miR-4695-3p                 | -0.19 | -0.29 | 8.42  | 2.79E-02 | 7.74E-02 |
| 42538  | hsa-miR-196a-3p                 | -0.15 | -0.29 | 7.04  | 2.82E-02 | 7.79E-02 |
| 168578 | hsa-miR-5190                    | -0.27 | -0.61 | 5.62  | 2.86E-02 | 7.87E-02 |

|        |                    |       |       |       |          |          |
|--------|--------------------|-------|-------|-------|----------|----------|
| 6880   | hsa-miR-297        | -0.07 | 0.31  | 5.91  | 2.95E-02 | 8.10E-02 |
| 148098 | hsa-miR-374b-5p    | 0.31  | 0.02  | 7.22  | 3.22E-02 | 8.78E-02 |
| 27720  | hsa-miR-15a-5p     | 0.40  | 0.29  | 8.85  | 3.24E-02 | 8.80E-02 |
| 169311 | hsa-miR-4714-5p    | 0.27  | -0.37 | 9.76  | 3.28E-02 | 8.89E-02 |
| 42887  | hsa-miR-331-3p     | 0.27  | -0.10 | 6.25  | 3.32E-02 | 8.94E-02 |
| 145670 | hsa-miR-18b-5p     | 0.19  | 0.13  | 5.72  | 3.40E-02 | 9.11E-02 |
| 11023  | hsa-miR-222-3p     | 0.30  | -0.11 | 8.76  | 3.46E-02 | 9.23E-02 |
| 11053  | hsa-miR-32-5p      | 0.33  | 0.37  | 6.04  | 3.52E-02 | 9.37E-02 |
| 169260 | hsa-miR-4436b-3p   | -0.26 | -0.41 | 6.43  | 3.59E-02 | 9.51E-02 |
| 42847  | hsa-miR-497-5p     | 0.28  | -0.27 | 6.34  | 3.68E-02 | 9.70E-02 |
| 148495 | hsa-miR-3915       | -0.26 | -0.22 | 7.85  | 3.74E-02 | 9.83E-02 |
| 148652 | hsa-miR-620        | -0.10 | -0.14 | 6.37  | 3.77E-02 | 9.86E-02 |
| 146137 | hsa-miR-133a       | 0.37  | -0.11 | 5.99  | 3.85E-02 | 1.00E-01 |
| 11104  | hsa-miR-422a       | -0.15 | 0.30  | 6.44  | 3.89E-02 | 1.00E-01 |
| 168869 | hsa-miR-5010-3p    | -0.07 | 0.14  | 5.84  | 3.88E-02 | 1.00E-01 |
| 46731  | hsa-miR-4657       | -0.21 | -0.15 | 9.48  | 3.93E-02 | 1.01E-01 |
| 148217 | hsa-miR-23c        | 0.32  | -0.29 | 8.09  | 4.05E-02 | 1.04E-01 |
| 169407 | hsa-miR-4301       | 0.31  | 0.16  | 10.62 | 4.15E-02 | 1.06E-01 |
| 168986 | hsa-miR-4677-3p    | -0.23 | -0.43 | 6.36  | 4.16E-02 | 1.06E-01 |
| 169031 | hsa-miR-4726-5p    | 0.22  | -0.46 | 10.35 | 4.19E-02 | 1.06E-01 |
| 42746  | hsa-miR-647        | -0.13 | -0.33 | 5.88  | 4.20E-02 | 1.06E-01 |
| 146165 | hsa-miR-1973       | -0.59 | 0.03  | 9.18  | 4.23E-02 | 1.06E-01 |
| 169050 | hsa-miR-4787-5p    | -0.27 | -0.13 | 13.76 | 4.25E-02 | 1.06E-01 |
| 147722 | hsa-miR-4306       | 0.20  | -0.23 | 8.88  | 4.29E-02 | 1.07E-01 |
| 10987  | hsa-miR-193b-3p    | 0.29  | -0.36 | 6.33  | 4.32E-02 | 1.07E-01 |
| 17377  | hsa-miR-600        | -0.12 | -0.42 | 6.12  | 4.36E-02 | 1.08E-01 |
| 169320 | hsa-miR-4468       | 0.21  | -0.31 | 7.29  | 4.55E-02 | 1.12E-01 |
| 168882 | hsa-miR-664b-3p    | -0.16 | -0.21 | 9.74  | 4.57E-02 | 1.12E-01 |
| 42490  | hsa-miR-505-5p     | -0.10 | 0.26  | 6.80  | 4.70E-02 | 1.15E-01 |
| 148156 | hsa-miR-3686       | 0.14  | -0.10 | 10.94 | 4.75E-02 | 1.15E-01 |
| 169096 | hsa-miR-4804-3p    | -0.19 | -0.58 | 5.70  | 4.74E-02 | 1.15E-01 |
| 169319 | hsa-miR-3136-3p    | 0.27  | -0.25 | 8.76  | 4.86E-02 | 1.17E-01 |
| 17498  | hsa-miR-601        | -0.12 | -0.02 | 6.40  | 4.87E-02 | 1.17E-01 |
| 168702 | hsa-miR-4540       | -0.16 | -0.24 | 7.09  | 4.96E-02 | 1.19E-01 |
| 148077 | hsa-miR-3690       | 0.14  | -0.40 | 5.92  | 5.03E-02 | 1.19E-01 |
| 168722 | hsa-miR-4742-3p    | -0.15 | -0.24 | 7.14  | 5.01E-02 | 1.19E-01 |
| 168852 | hsa-miR-4764-5p    | -0.15 | -0.03 | 6.70  | 4.99E-02 | 1.19E-01 |
| 168811 | hsa-miR-1255b-2-3p | 0.18  | -0.28 | 6.62  | 5.16E-02 | 1.22E-01 |
| 169271 | hsa-miR-4784       | -0.19 | -0.24 | 7.39  | 5.20E-02 | 1.22E-01 |
| 42782  | hcmv-miR-UL148D    | -0.13 | 0.06  | 6.94  | 5.35E-02 | 1.25E-01 |
| 169034 | hsa-miR-642b-5p    | -0.20 | -0.09 | 11.43 | 5.53E-02 | 1.29E-01 |
| 168964 | hsa-miR-4450       | -0.13 | -0.05 | 6.85  | 5.57E-02 | 1.29E-01 |
| 148335 | hsa-miR-3606-5p    | 0.12  | -0.07 | 6.21  | 5.86E-02 | 1.35E-01 |
| 10943  | hsa-miR-136-5p     | 0.13  | 0.41  | 6.51  | 6.00E-02 | 1.38E-01 |
| 168978 | hsa-miR-371b-5p    | -0.24 | -0.14 | 13.15 | 6.08E-02 | 1.39E-01 |
| 148430 | hsa-miR-374c-5p    | 0.27  | -0.05 | 6.85  | 6.23E-02 | 1.42E-01 |

|        |                               |       |       |       |          |          |
|--------|-------------------------------|-------|-------|-------|----------|----------|
| 147923 | hsa-miR-3142                  | -0.13 | -0.34 | 5.90  | 6.50E-02 | 1.47E-01 |
| 27961  | hsa-miR-891a                  | -0.23 | -0.23 | 6.89  | 6.49E-02 | 1.47E-01 |
| 168815 | hsa-miR-4488                  | 0.20  | -0.30 | 7.10  | 6.56E-02 | 1.48E-01 |
| 168769 | hsa-miR-5002-5p               | 0.15  | -0.17 | 8.45  | 6.55E-02 | 1.48E-01 |
| 169188 | hsa-miR-4443                  | 0.12  | -0.08 | 11.32 | 6.60E-02 | 1.48E-01 |
| 168727 | hsa-miR-4426                  | -0.15 | -0.38 | 6.38  | 6.67E-02 | 1.49E-01 |
| 11022  | hsa-miR-221-3p                | 0.24  | 0.04  | 7.69  | 6.72E-02 | 1.49E-01 |
| 145638 | hsa-miR-29a-5p                | 0.15  | 0.20  | 6.00  | 6.73E-02 | 1.49E-01 |
| 168572 | hsa-miR-4507                  | 0.22  | -0.23 | 7.27  | 6.95E-02 | 1.54E-01 |
| 145693 | hsa-miR-92a-3p                | -0.20 | 0.02  | 7.92  | 7.14E-02 | 1.57E-01 |
| 46944  | hsa-miR-1297                  | 0.28  | 0.46  | 6.87  | 7.42E-02 | 1.63E-01 |
| 168959 | hsa-miR-4778-5p               | -0.20 | -0.22 | 6.55  | 7.50E-02 | 1.64E-01 |
| 168989 | hsa-miR-4447                  | -0.09 | 0.18  | 5.95  | 7.61E-02 | 1.66E-01 |
| 11041  | hsa-miR-29c-3p                | 0.28  | 0.02  | 9.46  | 7.91E-02 | 1.72E-01 |
| 19013  | SNORD14B                      | 0.14  | 0.04  | 6.55  | 7.96E-02 | 1.72E-01 |
| 13148  | hsa-miR-195-5p                | 0.41  | 0.14  | 9.15  | 8.04E-02 | 1.73E-01 |
| 148465 | hsa-miR-3611                  | -0.21 | -0.12 | 8.23  | 8.03E-02 | 1.73E-01 |
| 147664 | hsa-miR-4311                  | -0.08 | 0.06  | 5.76  | 8.10E-02 | 1.74E-01 |
| 148493 | hsa-miR-3613-3p               | 0.21  | 0.00  | 13.02 | 8.28E-02 | 1.77E-01 |
| 10985  | hsa-miR-191-5p                | -0.17 | 0.04  | 8.76  | 8.48E-02 | 1.80E-01 |
| 42932  | hsa-miR-920                   | -0.12 | -0.14 | 6.71  | 8.56E-02 | 1.82E-01 |
| 148206 | hsa-miR-3664-5p               | -0.08 | 0.69  | 5.95  | 8.62E-02 | 1.82E-01 |
| 148657 | hsa-miR-381-5p                | 0.12  | -0.17 | 5.63  | 8.76E-02 | 1.84E-01 |
| 168955 | hsa-miR-4756-3p               | -0.11 | -0.25 | 6.51  | 9.01E-02 | 1.89E-01 |
| 169203 | hsa-miR-5095                  | -0.16 | -0.36 | 6.64  | 9.02E-02 | 1.89E-01 |
| 19005  | SNORD118                      | -0.27 | -0.26 | 8.74  | 9.34E-02 | 1.95E-01 |
| 168672 | hsa-miR-1587                  | 0.23  | -0.20 | 8.46  | 9.73E-02 | 2.02E-01 |
| 10928  | hsa-miR-125a-5p               | 0.26  | -0.14 | 9.38  | 9.97E-02 | 2.05E-01 |
| 10967  | hsa-miR-16-5p                 | 0.45  | 0.37  | 10.07 | 1.00E-01 | 2.05E-01 |
| 46810  | hsa-miR-1827                  | -0.09 | -0.01 | 9.26  | 1.00E-01 | 2.05E-01 |
| 148327 | hsa-miR-3651                  | -0.18 | -0.12 | 6.86  | 9.93E-02 | 2.05E-01 |
| 148361 | hsa-miR-3911                  | -0.08 | 0.24  | 6.32  | 1.01E-01 | 2.06E-01 |
| 17882  | hsa-miR-20b-3p                | -0.09 | 0.18  | 6.03  | 1.02E-01 | 2.07E-01 |
| 169228 | hsa-miR-4698                  | -0.25 | -0.31 | 7.87  | 1.02E-01 | 2.07E-01 |
| 42532  | hsa-miR-22-5p                 | 0.14  | 0.34  | 6.47  | 1.04E-01 | 2.10E-01 |
| 169035 | hsa-miR-4658                  | -0.14 | -0.15 | 6.73  | 1.04E-01 | 2.10E-01 |
| 147864 | hsv2-miR-H24                  | 0.07  | 0.24  | 5.89  | 1.04E-01 | 2.10E-01 |
| 169408 | hsa-miR-181d                  | 0.11  | 0.05  | 6.31  | 1.06E-01 | 2.11E-01 |
| 147907 | hsa-miR-4312                  | 0.08  | 0.18  | 6.45  | 1.06E-01 | 2.11E-01 |
| 168819 | hsa-miR-200a-3p               | -0.47 | -0.04 | 8.78  | 1.07E-01 | 2.12E-01 |
| 169171 | hsa-miR-4436b-5p              | -0.15 | -0.10 | 7.50  | 1.07E-01 | 2.12E-01 |
| 169009 | hsa-miR-548ap-5p/hsa-miR-548j | 0.23  | -0.48 | 6.95  | 1.08E-01 | 2.13E-01 |
| 168998 | hsa-miR-4508                  | 0.22  | -0.33 | 8.60  | 1.10E-01 | 2.16E-01 |
| 42923  | hsa-miR-30c-5p                | 0.25  | -0.08 | 9.08  | 1.12E-01 | 2.21E-01 |
| 148086 | hsa-miR-548aa/hsa-miR-548t-3p | 0.18  | -0.26 | 6.17  | 1.13E-01 | 2.21E-01 |
| 169393 | hsa-miR-4747-5p               | -0.18 | -0.19 | 8.96  | 1.14E-01 | 2.23E-01 |

|        |                   |       |       |       |          |          |
|--------|-------------------|-------|-------|-------|----------|----------|
| 46206  | SNORD44           | 0.30  | -0.04 | 8.73  | 1.17E-01 | 2.26E-01 |
| 19604  | SNORD4A           | -0.16 | -0.08 | 8.70  | 1.16E-01 | 2.26E-01 |
| 146091 | hsa-miR-1914-5p   | -0.11 | -0.08 | 6.02  | 1.17E-01 | 2.27E-01 |
| 168687 | hsa-miR-29a-3p    | 0.24  | 0.01  | 10.34 | 1.18E-01 | 2.27E-01 |
| 168557 | hsa-miR-4777-5p   | -0.15 | -0.31 | 6.92  | 1.20E-01 | 2.29E-01 |
| 27568  | hsa-miR-744-5p    | -0.18 | -0.30 | 7.61  | 1.20E-01 | 2.29E-01 |
| 10947  | hsa-miR-142-3p    | 0.50  | -0.02 | 9.66  | 1.21E-01 | 2.30E-01 |
| 42723  | hsa-miR-195-3p    | -0.08 | 0.00  | 5.94  | 1.21E-01 | 2.30E-01 |
| 168911 | hsa-miR-4682      | 0.22  | -0.41 | 7.15  | 1.21E-01 | 2.30E-01 |
| 11182  | hsa-miR-98-5p     | 0.19  | 0.31  | 7.42  | 1.21E-01 | 2.30E-01 |
| 169170 | hsa-miR-4472      | -0.17 | -0.03 | 7.22  | 1.22E-01 | 2.30E-01 |
| 17608  | hsa-miR-425-5p    | -0.11 | 0.01  | 6.59  | 1.24E-01 | 2.32E-01 |
| 147803 | hsv2-miR-H10      | 0.20  | -0.22 | 8.33  | 1.23E-01 | 2.32E-01 |
| 169238 | hsa-miR-4654      | 0.12  | -0.41 | 6.24  | 1.24E-01 | 2.32E-01 |
| 42783  | hsa-miR-197-3p    | 0.19  | -0.19 | 7.15  | 1.26E-01 | 2.35E-01 |
| 17567  | kshv-miR-K12-1-5p | -0.07 | 0.24  | 6.06  | 1.26E-01 | 2.35E-01 |
| 147735 | hsa-miR-4289      | 0.20  | -0.10 | 6.34  | 1.28E-01 | 2.37E-01 |
| 147738 | hsv2-miR-H20      | -0.07 | -0.01 | 6.42  | 1.30E-01 | 2.40E-01 |
| 168972 | hsa-miR-5004-3p   | -0.20 | -0.32 | 6.72  | 1.31E-01 | 2.41E-01 |
| 169316 | hsa-miR-3976      | 0.13  | -0.15 | 9.86  | 1.31E-01 | 2.41E-01 |
| 147840 | hsv2-miR-H9-3p    | -0.09 | -0.09 | 6.27  | 1.32E-01 | 2.41E-01 |
| 145968 | hsa-let-7d-5p     | 0.25  | 0.02  | 8.62  | 1.33E-01 | 2.42E-01 |
| 10925  | hsa-miR-10b-5p    | 0.39  | -0.10 | 7.77  | 1.33E-01 | 2.42E-01 |
| 168558 | hsa-miR-5585-3p   | -0.12 | -0.31 | 6.45  | 1.35E-01 | 2.45E-01 |
| 169132 | hsa-miR-382-3p    | 0.17  | -1.32 | 5.68  | 1.39E-01 | 2.52E-01 |
| 168798 | hsa-miR-4668-5p   | 0.18  | 0.07  | 13.43 | 1.39E-01 | 2.52E-01 |
| 17752  | hsa-let-7f-5p     | 0.24  | 0.48  | 7.33  | 1.41E-01 | 2.54E-01 |
| 147823 | hsa-miR-3146      | -0.08 | 0.09  | 5.93  | 1.46E-01 | 2.62E-01 |
| 145820 | hsa-let-7c        | 0.19  | -0.15 | 9.20  | 1.47E-01 | 2.63E-01 |
| 148247 | hsa-miR-2355-3p   | -0.08 | -0.02 | 7.19  | 1.48E-01 | 2.64E-01 |
| 42682  | hsa-miR-25-3p     | 0.11  | 0.09  | 7.08  | 1.49E-01 | 2.65E-01 |
| 46924  | hsa-miR-1252      | -0.10 | -0.02 | 6.00  | 1.52E-01 | 2.69E-01 |
| 10306  | hsa-miR-146b-5p   | 0.26  | 0.12  | 8.25  | 1.53E-01 | 2.70E-01 |
| 168948 | hsa-miR-4514      | -0.10 | -0.39 | 5.75  | 1.54E-01 | 2.71E-01 |
| 145678 | hsa-miR-150-5p    | 0.16  | -0.13 | 8.85  | 1.54E-01 | 2.71E-01 |
| 168763 | hsa-miR-3676-5p   | 0.18  | -0.31 | 7.18  | 1.55E-01 | 2.73E-01 |
| 28966  | hsa-miR-574-3p    | 0.18  | -0.11 | 8.26  | 1.57E-01 | 2.74E-01 |
| 10997  | hsa-miR-19a-3p    | 0.24  | 0.10  | 7.31  | 1.58E-01 | 2.76E-01 |
| 168878 | hsa-miR-5100      | 0.17  | -0.05 | 13.38 | 1.59E-01 | 2.76E-01 |
| 145846 | hsa-let-7e-5p     | 0.12  | 0.00  | 8.97  | 1.60E-01 | 2.77E-01 |
| 169416 | hsa-miRPlus-A1086 | 0.27  | -0.47 | 6.20  | 1.62E-01 | 2.79E-01 |
| 147743 | hsa-miR-4275      | 0.11  | -0.20 | 5.67  | 1.65E-01 | 2.84E-01 |
| 148234 | hsa-miR-3667-5p   | 0.14  | -0.22 | 9.29  | 1.66E-01 | 2.85E-01 |
| 145768 | hsa-miR-665       | -0.21 | -0.24 | 8.60  | 1.66E-01 | 2.85E-01 |
| 146158 | hsa-miR-3202      | 0.17  | -0.30 | 7.67  | 1.67E-01 | 2.86E-01 |
| 147885 | kshv-miR-K12-5-5p | -0.17 | -0.13 | 8.07  | 1.70E-01 | 2.90E-01 |



|        |                              |       |       |       |          |          |
|--------|------------------------------|-------|-------|-------|----------|----------|
| 169381 | hsa-miR-4421                 | -0.14 | -0.12 | 9.72  | 1.72E-01 | 2.92E-01 |
| 145745 | hsa-miR-335-3p               | -0.13 | -0.09 | 9.70  | 1.74E-01 | 2.95E-01 |
| 17358  | ebv-miR-BART16               | -0.11 | -0.14 | 7.14  | 1.76E-01 | 2.96E-01 |
| 42672  | hsa-miR-323b-5p              | 0.07  | 0.71  | 5.83  | 1.76E-01 | 2.96E-01 |
| 168768 | hsa-miR-4423-5p              | -0.10 | -0.30 | 6.55  | 1.77E-01 | 2.96E-01 |
| 169102 | hsa-miR-4639-3p              | -0.10 | -0.12 | 10.22 | 1.77E-01 | 2.96E-01 |
| 30033  | hsa-miR-877-5p               | 0.07  | 0.36  | 6.89  | 1.77E-01 | 2.96E-01 |
| 146008 | hsa-miR-26b-5p               | 0.31  | 0.33  | 9.42  | 1.80E-01 | 3.01E-01 |
| 46380  | hsa-miR-1255a                | -0.09 | -0.09 | 8.40  | 1.85E-01 | 3.07E-01 |
| 11260  | hsa-miR-151a-5p              | 0.17  | 0.19  | 7.01  | 1.86E-01 | 3.08E-01 |
| 169211 | hsa-miR-5704                 | -0.11 | -0.26 | 9.17  | 1.88E-01 | 3.10E-01 |
| 145933 | hsa-miR-652-5p               | 0.18  | -0.11 | 6.34  | 1.87E-01 | 3.10E-01 |
| 17280  | hsa-miR-15b-5p               | 0.22  | 0.19  | 8.50  | 1.90E-01 | 3.12E-01 |
| 169023 | hsa-miR-4712-3p              | -0.12 | -0.26 | 7.98  | 1.90E-01 | 3.12E-01 |
| 10923  | hsa-miR-107                  | 0.13  | 0.12  | 7.54  | 1.92E-01 | 3.14E-01 |
| 146117 | hsv1-miR-H6-3p               | 0.15  | -0.16 | 10.94 | 1.94E-01 | 3.17E-01 |
| 13485  | hsa-miR-10a-5p               | 0.29  | 0.10  | 8.44  | 1.95E-01 | 3.17E-01 |
| 17848  | hsa-miRPlus-A1087            | 0.16  | -0.09 | 6.63  | 1.97E-01 | 3.19E-01 |
| 42951  | ebv-miR-BHRF1-2-3p           | -0.14 | -0.15 | 9.03  | 2.00E-01 | 3.24E-01 |
| 46336  | hsa-miR-1284                 | -0.07 | -0.16 | 6.32  | 2.05E-01 | 3.31E-01 |
| 46356  | hsa-miR-30b-3p               | -0.06 | 0.27  | 5.88  | 2.07E-01 | 3.33E-01 |
| 46808  | hsa-miR-4485                 | -0.22 | -0.50 | 5.66  | 2.08E-01 | 3.34E-01 |
| 168925 | hsa-miR-1273g-3p             | 0.10  | -0.14 | 11.04 | 2.08E-01 | 3.34E-01 |
| 148059 | hsa-miR-493-5p               | -0.11 | -0.22 | 7.45  | 2.09E-01 | 3.34E-01 |
| 147662 | hsv2-miR-H6-5p               | 0.15  | -0.42 | 5.76  | 2.10E-01 | 3.35E-01 |
| 169091 | hsa-miR-5006-5p              | 0.07  | 0.07  | 5.75  | 2.14E-01 | 3.40E-01 |
| 147804 | hsv1-miR-H17                 | -0.10 | -0.20 | 6.21  | 2.17E-01 | 3.44E-01 |
| 169232 | hsa-miR-3156-3p              | 0.07  | -0.27 | 8.18  | 2.21E-01 | 3.49E-01 |
| 168922 | hsa-miR-5584-3p              | -0.10 | -0.33 | 6.39  | 2.23E-01 | 3.52E-01 |
| 147631 | hsa-miR-4258                 | 0.10  | 0.70  | 7.18  | 2.26E-01 | 3.56E-01 |
| 147576 | hsv1-miR-H1-3p               | 0.06  | 0.71  | 5.96  | 2.27E-01 | 3.56E-01 |
| 46634  | hsa-miR-1281                 | -0.06 | 0.69  | 6.25  | 2.28E-01 | 3.56E-01 |
| 147165 | hsa-let-7b-5p                | 0.15  | -0.02 | 10.93 | 2.31E-01 | 3.59E-01 |
| 42703  | hsa-miR-490-3p               | -0.14 | -0.49 | 6.34  | 2.31E-01 | 3.59E-01 |
| 147415 | hsa-miR-495-5p               | -0.06 | -0.13 | 6.29  | 2.31E-01 | 3.59E-01 |
| 169390 | hsa-miR-4800-5p              | -0.14 | -0.41 | 6.30  | 2.32E-01 | 3.60E-01 |
| 46443  | hsa-miR-193a-5p              | 0.08  | 0.54  | 6.02  | 2.38E-01 | 3.67E-01 |
| 147632 | hsa-miR-4297                 | -0.07 | -0.01 | 6.91  | 2.39E-01 | 3.68E-01 |
| 168871 | hsa-miR-151a-5p/hsa-miR-151b | 0.19  | -0.13 | 7.07  | 2.40E-01 | 3.70E-01 |
| 148418 | hsa-miR-3607-5p              | -0.12 | -0.15 | 7.42  | 2.44E-01 | 3.75E-01 |
| 169341 | hsa-miR-4632-3p              | -0.07 | 0.17  | 6.43  | 2.45E-01 | 3.75E-01 |
| 147162 | hsa-let-7a-5p                | 0.28  | 0.07  | 9.87  | 2.47E-01 | 3.77E-01 |
| 19582  | hsa-miR-106b-5p              | 0.14  | 0.17  | 8.18  | 2.49E-01 | 3.79E-01 |
| 19008  | SNORD2                       | 0.13  | -0.04 | 9.70  | 2.50E-01 | 3.79E-01 |
| 169183 | hsa-miR-4644                 | -0.14 | -0.24 | 8.99  | 2.52E-01 | 3.81E-01 |
| 17875  | hsa-miR-500a-5p              | -0.04 | 0.11  | 5.85  | 2.52E-01 | 3.81E-01 |

|        |                   |       |       |       |          |          |
|--------|-------------------|-------|-------|-------|----------|----------|
| 145666 | SNORD110          | 0.10  | -0.03 | 7.35  | 2.52E-01 | 3.81E-01 |
| 145676 | hsa-miR-30e-3p    | 0.17  | 0.04  | 6.64  | 2.53E-01 | 3.81E-01 |
| 169193 | hsa-miR-4725-5p   | -0.11 | -0.55 | 6.90  | 2.54E-01 | 3.81E-01 |
| 169185 | hsa-miR-5187-3p   | -0.12 | -0.37 | 7.56  | 2.55E-01 | 3.82E-01 |
| 42640  | hsa-miR-20b-5p    | 0.23  | 0.08  | 6.30  | 2.60E-01 | 3.88E-01 |
| 46438  | hsa-let-7g-5p     | 0.21  | 0.22  | 9.64  | 2.64E-01 | 3.90E-01 |
| 148263 | hsa-miR-1273e     | -0.12 | -0.22 | 7.66  | 2.62E-01 | 3.90E-01 |
| 145798 | hsa-miR-142-5p    | 0.27  | -0.27 | 7.61  | 2.63E-01 | 3.90E-01 |
| 168863 | hsa-miR-4441      | -0.10 | -0.36 | 5.89  | 2.64E-01 | 3.90E-01 |
| 19603  | SNORD13           | 0.16  | -0.11 | 9.27  | 2.66E-01 | 3.93E-01 |
| 147600 | hsa-miR-4292      | 0.07  | 0.18  | 5.83  | 2.68E-01 | 3.95E-01 |
| 169385 | hsa-miR-4500      | 0.12  | -0.01 | 9.18  | 2.70E-01 | 3.95E-01 |
| 168893 | hsa-miR-4505      | -0.16 | -0.25 | 8.99  | 2.70E-01 | 3.95E-01 |
| 27672  | hsa-miR-615-3p    | -0.06 | 0.09  | 6.43  | 2.70E-01 | 3.95E-01 |
| 46880  | hsa-miR-1183      | -0.04 | 0.18  | 5.78  | 2.72E-01 | 3.97E-01 |
| 168682 | hsa-miR-4502      | -0.06 | -0.15 | 5.79  | 2.73E-01 | 3.97E-01 |
| 46462  | hsa-miR-1224-5p   | 0.06  | 0.67  | 5.80  | 2.79E-01 | 4.04E-01 |
| 14300  | hsa-miR-29c-5p    | 0.10  | 0.24  | 6.16  | 2.81E-01 | 4.07E-01 |
| 13140  | hsa-miR-138-5p    | -0.08 | 0.06  | 5.94  | 2.84E-01 | 4.09E-01 |
| 169264 | hsa-miR-4762-5p   | 0.13  | -0.41 | 7.01  | 2.84E-01 | 4.09E-01 |
| 169388 | hsa-miR-663a      | -0.20 | -0.57 | 7.33  | 2.85E-01 | 4.09E-01 |
| 168750 | hsa-miR-4645-5p   | -0.07 | -0.38 | 5.94  | 2.86E-01 | 4.11E-01 |
| 17488  | kshv-miR-K12-6-3p | -0.14 | -0.27 | 8.18  | 2.87E-01 | 4.11E-01 |
| 145675 | hsa-miR-501-5p    | -0.12 | 0.32  | 6.14  | 2.88E-01 | 4.11E-01 |
| 19606  | SNORD12           | -0.06 | 0.08  | 6.49  | 2.89E-01 | 4.11E-01 |
| 46204  | SNORD38B          | 0.19  | -0.15 | 8.94  | 2.89E-01 | 4.11E-01 |
| 46205  | SNORD48           | 0.12  | -0.09 | 9.28  | 2.90E-01 | 4.11E-01 |
| 17810  | hsa-miR-29b-1-5p  | 0.06  | 0.86  | 6.56  | 2.92E-01 | 4.13E-01 |
| 42869  | hsa-miR-936       | -0.06 | 0.03  | 5.73  | 2.92E-01 | 4.13E-01 |
| 46623  | hsa-miR-1273a     | -0.06 | -0.30 | 6.20  | 3.01E-01 | 4.24E-01 |
| 168709 | hsa-miR-4429      | -0.07 | -0.11 | 8.42  | 3.03E-01 | 4.25E-01 |
| 146103 | hsa-miR-1913      | 0.05  | 0.75  | 6.01  | 3.05E-01 | 4.26E-01 |
| 168802 | hsa-miR-4516      | -0.15 | -0.25 | 10.67 | 3.05E-01 | 4.26E-01 |
| 146112 | hsa-miR-30b-5p    | 0.22  | 0.10  | 8.95  | 3.06E-01 | 4.27E-01 |
| 28191  | hsa-miR-30e-5p    | 0.17  | 0.07  | 7.88  | 3.15E-01 | 4.38E-01 |
| 11141  | hsa-miR-509-3p    | 0.07  | 1.07  | 5.88  | 3.15E-01 | 4.38E-01 |
| 168648 | hsa-miR-4687-5p   | 0.07  | -0.08 | 6.06  | 3.16E-01 | 4.39E-01 |
| 148038 | hsa-miR-3679-3p   | 0.07  | 1.19  | 7.53  | 3.18E-01 | 4.40E-01 |
| 145845 | hsa-miR-20a-5p    | 0.24  | 0.33  | 8.22  | 3.19E-01 | 4.41E-01 |
| 169123 | hsa-miR-3184-3p   | -0.04 | 0.00  | 6.05  | 3.22E-01 | 4.44E-01 |
| 42739  | hsa-miR-339-5p    | 0.08  | -0.32 | 6.12  | 3.26E-01 | 4.47E-01 |
| 42696  | hsa-miR-943       | 0.13  | -0.24 | 8.36  | 3.33E-01 | 4.57E-01 |
| 148228 | hsa-miR-3656      | 0.12  | -0.15 | 8.02  | 3.40E-01 | 4.66E-01 |
| 17328  | ebv-miR-BART8-3p  | 0.12  | -0.30 | 7.35  | 3.47E-01 | 4.71E-01 |
| 46752  | hsa-miR-1270      | -0.05 | 0.52  | 6.48  | 3.46E-01 | 4.71E-01 |
| 11065  | hsa-miR-335-5p    | 0.16  | 0.20  | 6.31  | 3.47E-01 | 4.71E-01 |

|        |                   |       |       |       |          |          |
|--------|-------------------|-------|-------|-------|----------|----------|
| 147817 | hsa-miR-3196      | -0.15 | -0.35 | 8.57  | 3.54E-01 | 4.79E-01 |
| 169322 | hsa-miR-4534      | 0.14  | -0.35 | 6.65  | 3.54E-01 | 4.79E-01 |
| 42950  | hsa-miR-24-2-5p   | 0.06  | 0.07  | 5.91  | 3.55E-01 | 4.79E-01 |
| 17327  | hsa-miR-630       | -0.06 | 0.01  | 7.01  | 3.66E-01 | 4.93E-01 |
| 42466  | ebv-miR-BART18-3p | -0.04 | 0.56  | 6.22  | 3.75E-01 | 5.05E-01 |
| 17546  | hsa-miR-585       | -0.08 | -0.16 | 5.81  | 3.77E-01 | 5.06E-01 |
| 42694  | hsa-miR-485-3p    | -0.07 | -0.23 | 7.09  | 3.79E-01 | 5.08E-01 |
| 42906  | ebv-miR-BHRF1-1   | -0.07 | -0.42 | 6.35  | 3.86E-01 | 5.16E-01 |
| 42769  | hsa-let-7b-3p     | -0.05 | -0.22 | 6.28  | 3.89E-01 | 5.17E-01 |
| 147588 | hsa-miR-4288      | 0.10  | -0.10 | 8.29  | 3.88E-01 | 5.17E-01 |
| 168870 | hsa-miR-1246      | 0.14  | 0.09  | 12.97 | 3.97E-01 | 5.27E-01 |
| 11007  | hsa-miR-206       | -0.04 | 0.44  | 6.06  | 3.99E-01 | 5.29E-01 |
| 42581  | hsa-miR-513a-5p   | 0.12  | 0.03  | 9.05  | 4.02E-01 | 5.32E-01 |
| 11111  | hsa-miR-432-5p    | 0.04  | 0.58  | 5.91  | 4.05E-01 | 5.34E-01 |
| 168958 | hsa-miR-2681-5p   | -0.08 | -0.54 | 6.96  | 4.07E-01 | 5.36E-01 |
| 17961  | hsa-miR-629-5p    | -0.03 | 0.48  | 6.02  | 4.08E-01 | 5.36E-01 |
| 169409 | hsa-miR-4286      | -0.09 | -0.07 | 8.82  | 4.09E-01 | 5.36E-01 |
| 147975 | hsa-miRPlus-J1003 | -0.03 | 0.39  | 5.98  | 4.12E-01 | 5.38E-01 |
| 148052 | hsa-miR-374c-3p   | 0.03  | 0.54  | 5.84  | 4.13E-01 | 5.39E-01 |
| 148214 | hsa-miR-3675-3p   | -0.06 | -0.48 | 6.62  | 4.20E-01 | 5.43E-01 |
| 27565  | hsa-miR-423-5p    | 0.06  | -0.24 | 8.78  | 4.20E-01 | 5.43E-01 |
| 169167 | hsa-miR-4451      | 0.06  | -0.26 | 7.81  | 4.19E-01 | 5.43E-01 |
| 42591  | hsa-miR-634       | 0.11  | -0.17 | 8.78  | 4.20E-01 | 5.43E-01 |
| 145663 | SNORD68           | -0.09 | -0.01 | 11.43 | 4.20E-01 | 5.43E-01 |
| 168919 | hsa-miR-4456      | 0.06  | -0.17 | 10.49 | 4.21E-01 | 5.43E-01 |
| 42442  | hsa-miR-498       | -0.06 | 0.04  | 7.29  | 4.23E-01 | 5.43E-01 |
| 145705 | hsa-miR-431-5p    | 0.05  | 0.84  | 5.91  | 4.25E-01 | 5.44E-01 |
| 19605  | SNORD6            | -0.08 | -0.11 | 9.82  | 4.25E-01 | 5.44E-01 |
| 169272 | hsa-miR-4419b     | 0.08  | -0.13 | 10.53 | 4.30E-01 | 5.50E-01 |
| 145753 | hsa-miR-484       | -0.04 | 0.05  | 5.88  | 4.31E-01 | 5.50E-01 |
| 168619 | hsa-miR-1260b     | -0.07 | -0.08 | 12.97 | 4.44E-01 | 5.65E-01 |
| 42530  | hsa-let-7a-2-3p   | 0.03  | -0.06 | 6.20  | 4.46E-01 | 5.66E-01 |
| 169336 | hsa-miR-17-5p     | 0.14  | 0.05  | 7.45  | 4.52E-01 | 5.72E-01 |
| 169295 | hsa-miR-4725-3p   | 0.07  | -0.37 | 6.37  | 4.52E-01 | 5.72E-01 |
| 148057 | hsa-miR-186-3p    | 0.14  | 0.14  | 6.04  | 4.54E-01 | 5.73E-01 |
| 19585  | hsa-miR-148b-3p   | 0.06  | 0.25  | 6.79  | 4.58E-01 | 5.77E-01 |
| 146161 | hsa-miR-2115-3p   | 0.04  | -0.19 | 6.13  | 4.59E-01 | 5.77E-01 |
| 145889 | hsa-miR-196b-5p   | -0.08 | 0.39  | 6.43  | 4.62E-01 | 5.79E-01 |
| 146111 | hsa-miR-767-5p    | -0.06 | -0.09 | 7.21  | 4.63E-01 | 5.79E-01 |
| 168674 | hsa-miR-4716-5p   | -0.05 | -0.13 | 6.93  | 4.68E-01 | 5.85E-01 |
| 10919  | hsa-miR-103a-3p   | 0.08  | 0.18  | 8.61  | 4.70E-01 | 5.85E-01 |
| 148265 | hsa-miR-3935      | 0.05  | -0.25 | 7.68  | 4.70E-01 | 5.85E-01 |
| 46222  | hsa-miR-1228-5p   | 0.04  | 0.86  | 5.95  | 4.73E-01 | 5.87E-01 |
| 46258  | hsa-miR-1184      | 0.08  | -0.37 | 7.00  | 4.77E-01 | 5.91E-01 |
| 10972  | hsa-miR-181b-5p   | 0.04  | 0.18  | 6.24  | 4.81E-01 | 5.95E-01 |
| 10964  | hsa-miR-155-5p    | 0.10  | 0.24  | 8.01  | 4.83E-01 | 5.96E-01 |

|        |                      |       |       |       |          |          |
|--------|----------------------|-------|-------|-------|----------|----------|
| 147891 | hsa-miR-3175         | -0.07 | -0.16 | 8.08  | 5.04E-01 | 6.19E-01 |
| 17493  | hsa-miR-622          | 0.04  | 0.05  | 6.34  | 5.03E-01 | 6.19E-01 |
| 169376 | hsa-miR-5701         | -0.09 | 0.08  | 10.78 | 5.11E-01 | 6.27E-01 |
| 148278 | hsa-miR-138-2-3p     | -0.05 | 0.18  | 5.84  | 5.16E-01 | 6.32E-01 |
| 147187 | hsa-miR-215          | 0.20  | 0.11  | 7.58  | 5.27E-01 | 6.43E-01 |
| 42523  | hsa-miR-26b-3p       | -0.04 | 0.79  | 5.87  | 5.27E-01 | 6.43E-01 |
| 10955  | hsa-miR-148a-3p      | 0.11  | 0.08  | 7.31  | 5.34E-01 | 6.50E-01 |
| 42793  | hsa-miRPlus-A1072    | 0.08  | -0.32 | 7.43  | 5.38E-01 | 6.54E-01 |
| 17858  | hsa-miRPlus-A1073    | 0.04  | 1.23  | 6.45  | 5.41E-01 | 6.56E-01 |
| 46801  | hsa-miR-106a-5p      | 0.10  | 0.05  | 7.08  | 5.46E-01 | 6.58E-01 |
| 18739  | hsa-miR-186-5p       | -0.04 | 0.20  | 6.73  | 5.45E-01 | 6.58E-01 |
| 147667 | hsa-miR-3182         | -0.13 | -0.20 | 9.87  | 5.45E-01 | 6.58E-01 |
| 11134  | hsa-miR-502-5p       | -0.03 | 0.63  | 6.01  | 5.48E-01 | 6.59E-01 |
| 168917 | hsa-miR-4511         | -0.13 | -0.57 | 7.30  | 5.52E-01 | 6.62E-01 |
| 19588  | hsa-miR-17-3p        | 0.04  | -0.16 | 5.75  | 5.57E-01 | 6.67E-01 |
| 169169 | hsa-miR-5684         | 0.05  | -0.19 | 10.58 | 5.59E-01 | 6.68E-01 |
| 42832  | hsa-miR-638          | -0.08 | -0.25 | 7.92  | 5.60E-01 | 6.69E-01 |
| 168637 | hsa-miR-3940-5p      | 0.07  | -0.22 | 11.26 | 5.63E-01 | 6.71E-01 |
| 10936  | hsa-miR-130b-3p      | 0.03  | 0.18  | 6.41  | 5.76E-01 | 6.84E-01 |
| 11004  | hsa-miR-203a         | -0.12 | 0.20  | 6.85  | 5.85E-01 | 6.94E-01 |
| 17898  | hsa-miR-99b-3p       | 0.03  | 0.24  | 6.46  | 5.88E-01 | 6.96E-01 |
| 14313  | hsa-miR-499a-5p      | -0.03 | 1.04  | 5.92  | 5.93E-01 | 7.01E-01 |
| 17463  | hsa-miR-151a-3p      | -0.04 | 0.20  | 6.82  | 6.05E-01 | 7.12E-01 |
| 148599 | hsa-miR-3680-5p      | 0.03  | -0.01 | 6.59  | 6.05E-01 | 7.12E-01 |
| 169136 | hsa-miR-5006-3p      | -0.04 | -0.21 | 6.33  | 6.06E-01 | 7.12E-01 |
| 169129 | hsa-miR-4284         | 0.13  | -0.04 | 13.49 | 6.10E-01 | 7.16E-01 |
| 146113 | hsa-miRPlus-G1246-3p | -0.04 | -0.14 | 6.41  | 6.16E-01 | 7.21E-01 |
| 168899 | hsa-miR-1285-5p      | -0.03 | -0.14 | 6.83  | 6.19E-01 | 7.24E-01 |
| 145840 | hsa-let-7f-1-3p      | 0.03  | -0.21 | 5.77  | 6.22E-01 | 7.24E-01 |
| 27533  | hsa-miR-320a         | -0.05 | 0.04  | 8.69  | 6.22E-01 | 7.24E-01 |
| 46427  | hsa-miR-1248         | 0.04  | 0.41  | 6.48  | 6.34E-01 | 7.36E-01 |
| 169087 | hsa-miR-149-3p       | -0.06 | -0.56 | 8.04  | 6.44E-01 | 7.47E-01 |
| 19011  | SNORD10              | -0.07 | -0.11 | 9.32  | 6.60E-01 | 7.64E-01 |
| 169130 | hsa-miR-4764-3p      | -0.06 | 0.05  | 10.16 | 6.64E-01 | 7.67E-01 |
| 169363 | hsa-miR-320c         | -0.04 | -0.04 | 8.17  | 6.82E-01 | 7.86E-01 |
| 147926 | hsa-miR-4329         | -0.02 | -0.30 | 6.44  | 6.84E-01 | 7.87E-01 |
| 46210  | hsa-miR-1249         | 0.03  | 1.39  | 6.71  | 6.91E-01 | 7.93E-01 |
| 168758 | hsa-miR-4425         | 0.05  | -0.58 | 7.39  | 6.92E-01 | 7.93E-01 |
| 11181  | hsa-miR-95           | 0.04  | 0.30  | 5.75  | 6.94E-01 | 7.93E-01 |
| 46203  | SNORD49A             | 0.07  | -0.21 | 8.18  | 6.93E-01 | 7.93E-01 |
| 27544  | hsa-miR-363-5p       | 0.02  | 0.01  | 5.85  | 7.04E-01 | 8.03E-01 |
| 146110 | hsa-miR-3164         | 0.02  | 1.07  | 6.05  | 7.07E-01 | 8.04E-01 |
| 168748 | hsa-miR-320e         | -0.03 | -0.22 | 6.25  | 7.10E-01 | 8.07E-01 |
| 147751 | hsa-miR-4274         | 0.02  | 1.17  | 6.44  | 7.21E-01 | 8.18E-01 |
| 28019  | hsa-miR-10a-3p       | -0.03 | -0.18 | 5.80  | 7.23E-01 | 8.19E-01 |
| 146159 | hsv1-miR-H4-3p       | -0.02 | -0.19 | 7.14  | 7.26E-01 | 8.20E-01 |

|        |                     |       |       |       |          |          |
|--------|---------------------|-------|-------|-------|----------|----------|
| 168868 | hsa-miR-5681b       | -0.03 | -0.07 | 9.35  | 7.28E-01 | 8.21E-01 |
| 46324  | hsa-miR-320b        | -0.04 | -0.05 | 8.73  | 7.33E-01 | 8.23E-01 |
| 168915 | hsa-miR-4780        | -0.03 | -0.02 | 8.72  | 7.33E-01 | 8.23E-01 |
| 146042 | hsv1-miR-H8-3p      | -0.03 | 0.53  | 7.05  | 7.34E-01 | 8.23E-01 |
| 10954  | hsa-miR-147a        | -0.02 | 0.95  | 6.19  | 7.37E-01 | 8.25E-01 |
| 147739 | hsa-miR-3161        | 0.02  | -0.15 | 6.60  | 7.42E-01 | 8.29E-01 |
| 46791  | hsa-miR-1204        | -0.03 | 0.16  | 6.00  | 7.46E-01 | 8.33E-01 |
| 11140  | hsa-miR-508-3p      | 0.02  | 0.91  | 5.88  | 7.48E-01 | 8.33E-01 |
| 42865  | hsa-miR-181a-5p     | 0.03  | 0.14  | 7.81  | 7.62E-01 | 8.44E-01 |
| 148285 | hsa-miR-3941        | -0.03 | -0.03 | 8.28  | 7.63E-01 | 8.44E-01 |
| 168942 | hsa-miR-4636        | -0.08 | -0.37 | 7.16  | 7.62E-01 | 8.44E-01 |
| 168696 | hsa-miR-4739        | 0.03  | -0.31 | 7.19  | 7.62E-01 | 8.44E-01 |
| 42528  | hsa-miR-296-3p      | -0.02 | -0.15 | 5.91  | 7.65E-01 | 8.45E-01 |
| 42656  | kshv-miR-K12-10a-3p | 0.02  | 0.75  | 6.00  | 7.68E-01 | 8.47E-01 |
| 145633 | hsa-let-7d-3p       | 0.04  | -0.24 | 7.10  | 7.72E-01 | 8.49E-01 |
| 42654  | hsa-miR-483-5p      | 0.03  | -0.12 | 7.18  | 7.74E-01 | 8.49E-01 |
| 168944 | hsa-miR-4707-5p     | 0.03  | -0.28 | 7.47  | 7.79E-01 | 8.53E-01 |
| 168935 | hsa-miR-4687-3p     | -0.04 | -0.33 | 7.32  | 7.82E-01 | 8.54E-01 |
| 168963 | hsa-miR-664b-5p     | 0.03  | -0.01 | 6.86  | 7.81E-01 | 8.54E-01 |
| 146064 | hsa-miR-718         | -0.02 | 1.69  | 6.90  | 7.84E-01 | 8.54E-01 |
| 168864 | hsa-miR-320d        | -0.02 | -0.12 | 6.89  | 7.91E-01 | 8.61E-01 |
| 42749  | hsa-miR-659-3p      | -0.03 | -0.06 | 7.55  | 7.97E-01 | 8.66E-01 |
| 169015 | hsa-miR-4454        | -0.03 | -0.02 | 14.29 | 8.01E-01 | 8.68E-01 |
| 14301  | hsa-miR-361-5p      | 0.02  | 0.28  | 7.66  | 8.02E-01 | 8.68E-01 |
| 42571  | hsa-miR-129-1-3p    | 0.03  | -0.23 | 5.92  | 8.08E-01 | 8.72E-01 |
| 145962 | hsa-miR-639         | -0.01 | 0.32  | 6.04  | 8.07E-01 | 8.72E-01 |
| 147820 | hsa-miR-3133        | 0.04  | -0.17 | 6.94  | 8.13E-01 | 8.75E-01 |
| 168568 | hsa-miR-1290        | 0.04  | -0.14 | 8.32  | 8.16E-01 | 8.76E-01 |
| 42730  | hsa-miR-423-3p      | -0.02 | -0.16 | 7.01  | 8.17E-01 | 8.76E-01 |
| 27536  | hsa-miR-190a        | 0.03  | 0.83  | 6.49  | 8.25E-01 | 8.84E-01 |
| 10998  | hsa-miR-19b-3p      | 0.03  | 0.01  | 8.16  | 8.27E-01 | 8.84E-01 |
| 148064 | hsa-miR-3926        | -0.01 | -0.27 | 5.91  | 8.29E-01 | 8.85E-01 |
| 145973 | hsa-miR-664a-3p     | -0.01 | 0.11  | 7.19  | 8.37E-01 | 8.92E-01 |
| 145701 | hsa-miR-668         | -0.01 | 0.11  | 5.97  | 8.44E-01 | 8.98E-01 |
| 17863  | hsa-miR-934         | -0.01 | -0.08 | 6.44  | 8.46E-01 | 8.99E-01 |
| 42674  | hsa-miR-431-3p      | 0.01  | 0.71  | 5.83  | 8.54E-01 | 9.04E-01 |
| 169323 | hsa-miR-4723-3p     | 0.01  | 0.57  | 6.39  | 8.54E-01 | 9.04E-01 |
| 46264  | hsa-miR-298         | 0.01  | -0.14 | 5.99  | 8.69E-01 | 9.18E-01 |
| 42638  | hsa-miR-23a-5p      | 0.01  | 0.01  | 5.83  | 8.84E-01 | 9.31E-01 |
| 168951 | hsa-miR-548as-3p    | 0.02  | -0.20 | 9.39  | 8.85E-01 | 9.31E-01 |
| 28047  | hsa-miR-890         | 0.01  | 0.65  | 6.02  | 8.85E-01 | 9.31E-01 |
| 10952  | hsa-miR-146a-5p     | 0.02  | 0.03  | 7.99  | 9.09E-01 | 9.45E-01 |
| 147198 | hsa-miR-26a-5p      | 0.02  | 0.12  | 8.45  | 9.08E-01 | 9.45E-01 |
| 148413 | hsa-miR-3614-3p     | 0.01  | 1.06  | 6.13  | 9.05E-01 | 9.45E-01 |
| 169204 | hsa-miR-4709-3p     | -0.01 | -0.24 | 9.38  | 9.05E-01 | 9.45E-01 |
| 42504  | hsa-miR-593-3p      | 0.01  | 0.94  | 5.98  | 9.06E-01 | 9.45E-01 |

|        |                   |       |       |      |          |          |
|--------|-------------------|-------|-------|------|----------|----------|
| 29490  | hsa-miR-7-5p      | -0.01 | 0.42  | 7.13 | 9.03E-01 | 9.45E-01 |
| 17349  | hsa-miR-595       | -0.01 | 0.72  | 5.92 | 9.12E-01 | 9.48E-01 |
| 147988 | hsa-miR-3135a     | -0.01 | -0.29 | 6.06 | 9.17E-01 | 9.50E-01 |
| 32884  | hsa-miR-342-3p    | 0.02  | -0.25 | 7.12 | 9.27E-01 | 9.60E-01 |
| 11005  | hsa-miR-204-5p    | 0.00  | 0.72  | 5.83 | 9.31E-01 | 9.62E-01 |
| 42624  | kshv-miR-K12-10b  | 0.01  | 1.26  | 6.38 | 9.34E-01 | 9.64E-01 |
| 17492  | sv40-miR-S1-5p    | 0.02  | -0.37 | 9.95 | 9.36E-01 | 9.64E-01 |
| 46259  | hsa-miR-885-5p    | 0.00  | 0.71  | 5.94 | 9.38E-01 | 9.65E-01 |
| 46345  | hsa-miR-1207-3p   | 0.00  | 1.26  | 6.36 | 9.42E-01 | 9.67E-01 |
| 46565  | hsa-miR-1207-5p   | 0.00  | 0.78  | 5.83 | 9.51E-01 | 9.74E-01 |
| 46368  | hsa-miR-1282      | 0.00  | 1.18  | 6.09 | 9.53E-01 | 9.74E-01 |
| 145714 | hsa-miR-28-3p     | -0.01 | -0.09 | 5.78 | 9.54E-01 | 9.74E-01 |
| 145981 | hsa-miR-1285-3p   | 0.00  | -0.24 | 7.04 | 9.61E-01 | 9.78E-01 |
| 19596  | hsa-miR-30d-5p    | 0.00  | 0.14  | 7.94 | 9.65E-01 | 9.78E-01 |
| 46556  | hsa-miR-623       | 0.00  | 1.01  | 5.82 | 9.65E-01 | 9.78E-01 |
| 30687  | hsa-miR-93-5p     | 0.01  | 0.20  | 7.88 | 9.59E-01 | 9.78E-01 |
| 42795  | kshv-miR-K12-3-5p | 0.00  | -0.26 | 8.10 | 9.63E-01 | 9.78E-01 |
| 17306  | ebv-miR-BART12    | 0.00  | 0.86  | 6.07 | 9.71E-01 | 9.79E-01 |
| 46266  | hsa-miR-1825      | 0.00  | 0.80  | 5.83 | 9.68E-01 | 9.79E-01 |
| 147203 | hsa-miR-302a-3p   | 0.00  | -0.14 | 8.84 | 9.71E-01 | 9.79E-01 |
| 46416  | hsa-miR-1293      | 0.00  | 0.83  | 5.82 | 9.77E-01 | 9.84E-01 |
| 169143 | hsa-miR-4459      | 0.00  | -0.24 | 7.16 | 9.81E-01 | 9.85E-01 |
| 42476  | hsa-miR-374b-3p   | 0.00  | 0.33  | 6.05 | 9.87E-01 | 9.89E-01 |
| 148624 | hsa-miR-942       | 0.00  | 0.43  | 5.95 | 9.87E-01 | 9.89E-01 |
| 17854  | hsa-miR-106b-3p   | 0.00  | 0.94  | 6.64 | 9.96E-01 | 9.96E-01 |
